# Supplementary material for: Assessing the non-inferiority of prosthesis constructs used in hip replacement using data from the National Joint Registry of England, Wales, Northern Ireland and the Isle of Man: a benchmarking study
Source: PubMed Central journal article supplement (PMC6502009; doi:10.1136/bmjopen-2018-026685), 2019-04-29
Supplement: bmjopen-2018-026685.draft_revisions.pdf [file bmjopen-2018-026685.draft_revisions.pdf]

# BMJ Open

BMJ Open is committed to open peer review. As part of this commitment we make the peer review history of every article we publish publicly available.

When an article is published we post the peer reviewers' comments and the authors' responses online. We also post the versions of the paper that were used during peer review. These are the versions that the peer review comments apply to.

The versions of the paper that follow are the versions that were submitted during the peer review process. They are not the versions of record or the final published versions. They should not be cited or distributed as the published version of this manuscript.

BMJ Open is an open access journal and the full, final, typeset and author-corrected version of record of the manuscript is available on our site with no access controls, subscription charges or pay-per-view fees (<http://bmjopen.bmj.com>).

If you have any questions on BMJ Open's open peer review process please email [info.bmjopen@bmj.com](mailto:info.bmjopen@bmj.com)

# BMJ Open

## Assessing the non-inferiority of prosthesis constructs used in hip replacement using data from the National Joint Registry of England, Wales, Northern Ireland and the Isle of Man: A Benchmarking study

|                               |                                                                                                                                                                                                                                                                                                              |
|-------------------------------|--------------------------------------------------------------------------------------------------------------------------------------------------------------------------------------------------------------------------------------------------------------------------------------------------------------|
| Journal:                      | <i>BMJ Open</i>                                                                                                                                                                                                                                                                                              |
| Manuscript ID                 | bmjopen-2018-026685                                                                                                                                                                                                                                                                                          |
| Article Type:                 | Research                                                                                                                                                                                                                                                                                                     |
| Date Submitted by the Author: | 21-Sep-2018                                                                                                                                                                                                                                                                                                  |
| Complete List of Authors:     | Deere, Kevin; University of Bristol, School of Social & Community Medicine<br>Whitehouse, Michael; University of Bristol, Musculoskeletal Research Unit<br>Porter, Martyn; Wrightington Hospital<br>Blom, AW; University of Bristol,<br>Sayers, Adrian; University of Bristol, Musculoskeletal Research Unit |
| Keywords:                     | hip arthroplasty, non-inferiority, National Joint Registry, benchmarking, medical devices                                                                                                                                                                                                                    |
|                               |                                                                                                                                                                                                                                                                                                              |

SCHOLARONE™  
Manuscripts

Peer Review Only

1  
2  
3 **Assessing the non-inferiority of prosthesis constructs used in hip replacement using data from the**  
4 **National Joint Registry of England, Wales, Northern Ireland and the Isle of Man: A Benchmarking**  
5 **study.**  
6

7 Kevin Deere, Michael R Whitehouse, Martyn L Porter, Ashley W Blom, Adrian Sayers

8  
9  
10 Musculoskeletal Research Unit, Bristol Medical School, 1st Floor Learning & Research Building,  
11 Southmead Hospital, Bristol, BS10 5NB, UK

12  
13 Kevin Deere  
14 Senior research Associate

15  
16 Michael R Whitehouse  
17 Consultant Senior Lecturer in Trauma and Orthopaedics

18  
19 Ashley W Blom  
20 Professor of Orthopaedic Surgery and Head of Translational Health Sciences

21  
22 Adrian Sayers  
23 Senior Research Fellow

24  
25 National Institute for Health Research Bristol Biomedical Research Centre, University of Bristol

26  
27 Michael R Whitehouse  
28 Consultant Senior Lecturer in Trauma and Orthopaedics

29  
30 Ashley W Blom  
31 Professor of Orthopaedic Surgery and Head of Translational Health Sciences

32  
33 Centre for Hip Surgery, Wrightington Hospital, Lancashire, WN6 9EP, UK

34  
35 Martyn L Porter  
36 Consultant Orthopaedic Surgeon

37  
38 Bristol Medical School, Population Health Sciences, University of Bristol, Bristol, UK

39  
40 Adrian Sayers  
41 Senior Research Fellow

42  
43 **Corresponding author:** Adrian Sayers

44  
45 Musculoskeletal Research Unit,  
46 1st Floor Learning & Research Building,  
47 Southmead Hospital,  
48 Bristol,  
49 BS10 5NB, UK

50  
51 Email: [adrian.sayers@bristol.ac.uk](mailto:adrian.sayers@bristol.ac.uk)

52  
53 Tel: 0117 4147880

54  
55  
56  
57  
58  
59  
60 **Word count:** 4,021

## ABSTRACT

**Objectives** To investigate the relative performance of hip prosthesis constructs as compared to the best performing prosthesis constructs and illustrate the substantial variability in performance of currently used prostheses.

**Design** A non-inferiority study.

**Setting** The National Joint Registry for England, Wales, Northern Ireland and the Isle of Man (NJR)

**Participants** All patients with a primary total hip replacement registered in the NJR between 1<sup>st</sup> April 2003 and 31<sup>st</sup> December 2016.

**Main outcome measures** Kaplan-Meier failure function for hip prosthesis constructs. Failure difference between best performing construct and remaining constructs.

**Methods** Using a non-inferiority analysis, the performance of hip prosthesis constructs by brand were compared to the best performing contemporary construct. Construct failure was estimated using the 1-Kaplan Meier method, i.e. an estimate of net failure. The difference in failure between the contemporary benchmark and all other constructs was tested.

**Results** Of the 4,442 constructs used, only 134 had  $\geq 500$  procedures at risk at 3 years post-surgery, 89 of which were not demonstrated to be inferior to the benchmark by at least 100% relative risk. By 10 years post-surgery there were 26 constructs with  $\geq 500$  at risk, 13 of which were not demonstrated to be inferior by at least 20% relative risk.

Even fewer constructs were not inferior to the benchmark when analysed by age and gender. At 5 years post-surgery there were 15 constructs in males and 11 in females, aged 55-75, not shown to be inferior.

**Conclusions** There is great variability in construct performance and the majority of constructs have not been demonstrated to be non-inferior to contemporary benchmarks. We have a duty to inform patients, clinicians and commissioners of this variability in performance.

**ARTICLE SUMMARY****Strengths and limitations of this study**

- Data collected from the largest joint registry in the world
- For the first time we have explicitly compared the performance of prosthesis constructs to a contemporary reference.
- Unambiguous presentation of data allows surgeons, patients and policy makers to directly compare commonly used prosthesis constructs to a reference construct.
- Residual and unmeasured confounding factors are likely to be present.
- The number of patients remaining at risk after extended follow up is low, and therefore the power to detect non-inferiority after extended follow up is also low.

## INTRODUCTION

When patients are considering a hip replacement, they would be forgiven for thinking that all hip prostheses function equally.[1] However, all prostheses are not equal as evidenced by the failure of the 3M Capital hip implant, and Metal-on-Metal bearings.[2] The extent to which patients and clinicians are aware of this lack of equality is unclear.

The National Joint Registry for England, Wales, Northern Ireland and the Isle of Man (NJR) was established to identify poorly performing implants. It has not focused on identifying exceptionally well performing implants due to limitations inherent with routine data collection and interpreting data from a standpoint of cause and effect. The NJR publishes the unadjusted cumulative failure rates of the most commonly used stem and cup brand combinations used in hip replacement surgery.[3]

Therefore the role of promoting perceived good practice has been filled by other organisations such as the Orthopaedic Device Evaluation Panel (ODEP) in the UK,[4] NOV in the Netherlands,[5] and the Australian superior clinical performance program.[6] Benchmarking bodies typically attempt to provide some type of classification to describe whether an implant is functioning at an acceptable level or not.

In the absence of evidence from randomised control trials, benchmarking organisations and prostheses registries are currently the best sources of evidence for prosthesis performance. However, both registries and benchmarking bodies have limitations which make the interpretation of prosthesis, or prosthesis construct, performance difficult. The cumulative failure reported by the NJR gives an indication of implant construct performance in absolute terms, but head-to-head comparison of different constructs is difficult to estimate without more advanced statistical manipulation. The ODEP grading system is focused on individual implants rather than the constructs they form and is based on meeting an acceptable externally decided benchmark. This simple dichotomisation does not facilitate comparison between the many different prosthesis constructs being used today or illustrate the extensive variability in so called well performing prostheses.[7]

Sayers et al. recently proposed a method of comparison for joint replacement prostheses using a non-inferiority design against an external benchmark.[8] However, the primary limitation of this method is the arbitrary requirement for an externally specified benchmark.

In a non-inferiority clinical trial[9] that has failure as an outcome, two treatments (comparator and reference) can be directly compared to ensure that the comparator treatment is within a clinically acceptable range (non-inferiority margin) of the performance of the reference treatment at a

1  
2  
3 specified point in time.[10, 11] Therefore, standard methods for conducting non-inferiority trials  
4 could be applied in an orthopaedic benchmarking setting, assuming an appropriate comparator,  
5 non-inferiority margin, and time of interest can be identified.  
6  
7

8 Choosing an appropriate contemporary reference is difficult. There is no evidence from randomised  
9 trials that suggests any prosthesis construct outperforms all others, therefore the choice of  
10 reference is more heuristic. Patients would like to receive the best available care and clinicians  
11 would like to provide the best possible care, or at least care that it is non-inferior to the best.  
12 Therefore, the natural choice of reference against which all other prostheses should be compared is  
13 the construct with the lowest failure rate. However, in order to protect against chance, good fortune  
14 and a low observed failure rate, the construct should be used in large enough numbers to mitigate  
15 sampling variability.  
16  
17  
18  
19  
20

21 As the failure rate of prostheses is known to be influenced by both age and gender, the choice of  
22 reference should reflect this specificity.[12] Whereas the selection of an appropriate time and non-  
23 inferiority margin to assess prosthesis performance is much more subjective, as is the reader's  
24 specific interest. For example, a surgeon interested in an older patient with lower life expectancy,  
25 may be interested in minimising short-term complications opposed to ensuring long-term implant  
26 survivorship.  
27  
28  
29  
30

31 The aim of this study is to investigate the relative performance of hip prosthesis constructs as  
32 compared to the best performing prosthesis constructs using a non-inferiority study design, and  
33 illustrate the substantial variability in performance of currently used prostheses. Stem, bearing and  
34 cup brand combinations (constructs) are examined against non-inferiority margins of 20% relative  
35 risk and 100% relative risk at 3, 5, 7 and 10 years following surgery.  
36  
37  
38  
39  
40  
41  
42  
43  
44  
45  
46  
47  
48  
49  
50  
51  
52  
53  
54  
55  
56  
57  
58  
59  
60

## METHODS

### Patients and Data Sources

We identified all patients with a primary total hip replacement (THR) registered in the NJR between 1<sup>st</sup> April 2003 and 31<sup>st</sup> December 2016. All patients were consented to be included in the NJR as part of the standard NJR process.

Procedures were excluded if the patient age and gender were missing, or the National Health Service (NHS) number was untraceable and therefore mortality unknown. Procedures where the bearing surface was unknown or was not either Metal-on-Polyethylene (MoP), Ceramic-on-Polyethylene (CoP) or Ceramic-on-Ceramic (CoC) were also excluded from the analysis. Metal-on-Metal prosthesis constructs were excluded as their very high failure rates across all ages and both genders have already been demonstrated[2, 13] and their use no longer reflects contemporary practice.[7]

### Patient and public involvement

Patient representatives sit on the committee structure of the National Joint Registry. The research priorities of the National Joint Registry are identified by this committee structure and approved by the patient representatives.

### Statistical methods

Using a non-inferiority analysis, the performance of hip prosthesis constructs were compared to an internally identified reference group. Prosthesis construct failure was estimated using the 1-Kaplan Meier method i.e. an estimate of net failure.

Failure is defined using the first linked surgical revision; patients were censored at death or administratively censored on 31<sup>st</sup> December 2016. The difference in stratum specific failure probabilities compared to the reference were calculated at 3, 5, 7 and 10 years for all prosthesis (stem-cup) combinations, stratified by gender, and stratified by gender and age group (<55 years, 55 to 75 years, >75 years).

The difference and 95% confidence interval (CI) of the difference between the comparator prosthesis construct and the reference prosthesis construct was estimated at the specified time points. The standard error of the difference was constructed using a pooled estimate of the Greenwood Standard error,[14]

$$SE(\widehat{Diff}) = \sqrt{GSE_x^2 + GSE_{ref}^2},$$



and a z-test comparing the difference between the reference and test prosthesis was then constructed,

$$Z = \left( (\widehat{F}_{test} - \widehat{F}_{ref}) + \delta \right) / SE(\widehat{Diff}).$$

The stratum specific contemporaneous reference construct was selected as the stem-cup combination with the lowest failure rate with at least 1,000 patients at risk at the time point of interest.

Two non-inferiority margins were chosen to illustrate the sensitivity of the choice. The first margin was conservatively set at a 20% increase in relative risk of failure compared to the reference, in line with clinical trials using this methodology, albeit towards the upper end.[15] The second was a 100% increase in relative risk, i.e. a doubling in cumulative probability of failure, as this is an easily interpretable outcome.

Results are graphically reported for all comparator prosthesis constructs with at least 500 patients still at risk at the beginning of the time point of interest. Results are also reported in a tabular format for all comparator prosthesis constructs with at least 250 patients at risk at the beginning of the time point of interest (See supplementary tables).

Prosthesis constructs were either classified as non-inferior, inconclusive, or inferior. If the upper confidence interval is less than or equal to the 20% non-inferiority margin, the prosthesis construct was non-inferior. If the lower confidence interval of the difference was greater than the non-inferiority margin at either 20% or 100% the prosthesis construct was classed as inferior at 20% or 100% respectively. If the lower confidence limit is less than the non-inferiority margin, and the upper confidence greater than non-inferiority margin the construct was described as inconclusive, see figure 1 for graphical representation of the classification.

### **Sensitivity analysis**

We repeated all analyses using a historic reference group, this specified the reference at 3, 5, and 7 years as the best performing stem-cup prosthesis construct at 10 years with at least 1,000 still at risk in the stratum of interest.

All analyses were carried out using Stata 14.2 (College Station, Texas, USA).

## RESULTS

There were 890,681 primary hip replacements included in the NJR between 1<sup>st</sup> April 2003 and 31<sup>st</sup> December 2016. Following the application of the exclusion criteria defined above, 797,178 procedures were included in the final analysis, see supplementary figure 1. In total 4,442 different prosthesis constructs were used at least once. A detailed description of non-inferiority across all procedures is provided. Due to the large number of clinically relevant subdivisions and sensitivity analyses, results will be described more broadly. Constructs are described using by bearing and brand. Bearings are either ceramic (C), metal (M) or polythene (P). Brands are described listing the stem and cup combination [stem/cup].

Figures were produced for each stratification of gender, age group and time since primary. To view data at 3 years post primary for all men, men<55 years, men aged 55-75 and men>75 years see supplementary figures 2a, 2b, 2c and 2d respectively. To view data at 5 years post primary for all men, men<55 years, men aged 55-75 and men>75 years see supplementary figures 3a, 3b, 3c and 3d respectively. To view data at 7 years post primary for all men, men aged 55-75 and men>75 years see supplementary figures 4a, 4b, and 4c respectively. To view data at 10 years post primary for all men and men aged 55-75 see supplementary figures 5a and 5b respectively. To view data at 3 years post primary for all women, women<55 years, women aged 55-75 and women>75 years see supplementary figures 6a, 6b, 6c and 6d respectively. To view data at 5 years post primary for all women, women<55 years, women aged 55-75 and women>75 years see supplementary figures 7a, 7b, 7c and 7d respectively. To view data at 7 years post primary for all women, women<55 years, women aged 55-75 and women>75 years see supplementary figures 8a, 8b, 8c and 8d respectively. To view data at 10 years post primary for all women and women aged 55-75 see supplementary figures 9a and 9b respectively

Estimates for the difference in failure between the reference and comparator prosthesis constructs with  $\geq 250$  procedure at risk at the time of interest for all, and for each stratification of gender and age group were tabulated. To view data for all at 3, 5, 7 and 10 years post primary see supplementary tables 1a, 1b, 1c and 1d respectively. To view data in all women at 3, 5, 7 and 10 years post primary see supplementary tables 2a, 2b, 2c and 2d respectively. To view data for women <55 years at 3, 5 and 7 years post primary see supplementary tables 3a, 3b and 3c respectively. To view data for women between 55-75 years at 3, 5, 7 and 10 years post primary see supplementary tables 4a, 4b, 4c and 4d respectively. To view data for women >75 years at 3, 5 and 7 years post primary see supplementary tables 5a, 5b and 5c respectively. To view data in all men at 3, 5, 7 and 10 years post primary see supplementary tables 6a, 6b, 6c and 6d respectively. To view data in men <55 years at 3 and 5 years post primary see supplementary tables 7a and 7b respectively. To view

1  
2  
3 data in men between 55 and 75 years at 3, 5, 7 and 10 years post primary see supplementary tables  
4 8a, 8b, 8c and 8d respectively. To view data in men >75 years at 3, 5 and 7 years post primary see  
5 supplementary tables 9a, 9b and 9c respectively. The total number of implants at risk and total  
6 implant failures at each time-point can be seen in supplementary tables 10a and 10b respectively.  
7  
8  
9

### 12 **Non-inferiority - All procedures**

14 The reference prosthesis construct at 3 years was identified as the CoP MS-30/Low profile Muller.  
15 There were 1,554 procedures remaining at risk and the failure rate was 0.39% (95%CI 0.19 – 0.82).  
16 There were 134 prosthesis combinations with  $\geq 500$  procedures at risk. 90 combinations were  
17 classified as inferior to the reference by at least 20% relative risk of failure. 44 of the 90 were shown  
18 to be inferior by at least 100% relative risk (figure 2). No prosthesis constructs could be described as  
19 non-inferior.  
20  
21  
22

24 The reference prosthesis construct at 5 years was again identified as CoP MS-30/Low profile Muller.  
25 There were 1,125 procedures remaining at risk and the failure rate was 0.55% (95%CI 0.29 – 1.08).  
26 There were 99 prosthesis constructs with  $\geq 500$  procedures at risk. 74 prosthesis constructs were  
27 classified as inferior to the reference by at least 20% relative risk of failure. 39 of the 74 were shown  
28 to be inferior by at least 100% relative risk (figure 3). No prosthesis constructs could be described as  
29 non-inferior.  
30  
31  
32

34 The reference prosthesis constructs at 7 years was identified as the MoP Exeter V40/Elite Plus  
35 Cemented Cup. There were 1,173 procedures remaining at risk and the failure rate was 0.91%  
36 (95%CI 0.64 – 1.28). There were 69 prosthesis constructs with  $\geq 500$  procedures at risk. 48 prosthesis  
37 constructs were classified as inferior to the reference by at least 20% relative risk of failure. 20 of the  
38 48 were shown to be inferior by at least 100% relative risk (figure 4). No prosthesis constructs could  
39 be described as non-inferior.  
40  
41  
42

44 The reference prosthesis constructs at 10 years was identified as the MoP Exeter V40/Elite Plus  
45 Ogee. There were 3,580 procedures remaining at risk and the failure rate was 2.14% (95%CI 1.87 –  
46 2.45). There were 26 prosthesis constructs with  $\geq 500$  procedures at risk. 12 prosthesis constructs  
47 were classified as inferior to the reference by at least 20% relative risk of failure. 1 of the 12 was  
48 shown to be inferior by at least 100% relative risk (figure 5). Two prosthesis constructs were  
49 identified as non-inferior.  
50  
51  
52

### 54 **Non-inferiority - Gender specific.**

1  
2  
3 Gender specific non-inferiority analyses were also performed at 3, 5, 7, and 10 years after the  
4 primary operation.  
5

6  
7 At 3 years only a small number of prosthesis constructs demonstrated non-inferiority in comparison  
8 to the reference. Most striking is the large variability of prosthesis constructs used in females  
9 compared to males (58 different prosthesis constructs were used more than 500 times in males  
10 versus 93 in females), and the gender specific heterogeneity in performance. For example, the CoP  
11 Exeter V40/Exeter Contemporary Flanged is used as the reference at 3 years in males, yet is inferior  
12 by 20% compared to the reference in females at 3 years. A performance difference was also noted in  
13 the CoC SL-Plus cementless Stem/EP-Fit Plus between the genders. At 3 years the failure rate for this  
14 prosthesis constructs in all females was 1.75% yet in males after the same period the failure was  
15 5.11% ( $p < 0.001$ ).  
16  
17  
18  
19  
20

21 At 5 years the reference failure rate in females is less than half that in males. Whilst there are only 3  
22 prosthesis constructs marked as 100% worse than the reference prosthesis construct in males, there  
23 are 24 prosthesis constructs that are 100% worse than the reference in females. Some prosthesis  
24 constructs have been used in large numbers despite having relatively poor performance.  
25  
26  
27

28 At 7 years the reference failure rate in females remained less than half that of males. There were no  
29 prosthesis constructs, used in sufficient numbers, which could be described as non-inferior to the  
30 reference in both males and females. One prosthesis construct in males was at least 100% worse  
31 than the reference, whilst 14 prosthesis constructs were at least 100% worse in females.  
32  
33  
34

35 At 10 years no prosthesis constructs were described as non-inferior to the reference in both males  
36 and females and there were no implants inferior by 100% in either males or females.  
37  
38

### 39 **Non-inferiority- Gender and Age specific.**

40

41 Sub-dividing procedures by age and gender highlights the paucity of information available pertaining  
42 to either male or female patients <55 years undergoing THR. Similarly, the volume of longer-term  
43 outcomes on patients beyond 7 years is relatively low in comparison to the number of implanted  
44 prosthesis constructs. Most strikingly is the preference for hard-on-hard bearing surfaces (such as  
45 CoC) in younger male patients (<55 years). Five of the six prosthesis constructs with at least 500  
46 procedures at 3 years were CoC, contrasted with the vast majority of prosthesis constructs used in  
47 older male patients ( $\geq 55$  years) where either MoP or CoP bearing couples were used. In addition,  
48 changes to the distribution of failure rates of prostheses become increasingly apparent. For  
49 example, the reference prosthesis construct in males less than 55 years has a 60% increase in  
50 relative failure rate compared to the reference procedure for males over 75 years old.  
51  
52  
53  
54  
55  
56  
57  
58  
59  
60

1  
2  
3 The paucity of constructs in each age/gender group which have been utilised over 500 times and for  
4 which non-inferiority to the reference prosthesis construct is demonstrated is notable. For males  
5 <55 years, only 4 prosthesis constructs (including the reference construct) meet this requirement at  
6 3 years, 3 prosthesis constructs at 5 years and none thereafter. For women of the same age the  
7 numbers are 4 at 3 years, 3 at 5 years and 7 at 7 years, with none at 10 years. In the largest  
8 grouping, those aged between 55 and 75 years, for males, 16 prosthesis constructs meet this  
9 requirement at 5 years and only 7 at 10 years, whilst for women the number are 12 at 5 years and 9  
10 at 10 years.  
11  
12  
13  
14  
15

### 16 **Sensitivity Analysis**

17  
18 Using the reference prosthesis construct at 10 years as the reference at 3, 5, and 7 years, illustrates  
19 the temporal improvements in failure and the selective trajectory tracking of new prostheses  
20 constructs. The reference construct in all procedures at 10 years is the Exeter V40/Elite Plus Ogee  
21 with a failure rate of 2.14% (95%CI 1.87 – 2.45). Only 1 prosthesis construct is non-inferior and  
22 statistically superior i.e. the Exeter V40/Elite Plus Cemented cup, but it does not have 1,000 implants  
23 at risk at 10 years and therefore is not considered to be the reference construct. At 7, 5, and 3 years,  
24 the contemporary reference has a 0.59%, a 0.55%, and 0.40% lower failure rate than the historical  
25 reference respectively. Whilst the good performance of many prosthesis constructs appear to track,  
26 some exhibit substantially variability in their relative performance at the times of interest.  
27 Specifically, the MoP Exeter V40/Charnley Ogee is non-inferior to the historical reference at 10  
28 years, but is inferior by 20% at 5 years.  
29  
30  
31  
32  
33  
34  
35  
36  
37  
38  
39  
40  
41  
42  
43  
44  
45  
46  
47  
48  
49  
50  
51  
52  
53  
54  
55  
56  
57  
58  
59  
60

## DISCUSSION

We have demonstrated in 797,178 primary total hip replacements the relative performance of implanted prosthesis constructs in comparison to an internally selected contemporary reference. There is substantial variation in the performance of prosthesis constructs. A non-inferiority approach to benchmarking provides an immediate comparison of commonly used implanted prosthesis constructs compared to an internal contemporary reference and conveys distinct advantages opposed to standard Kaplan-Meier analyses as currently reported in the NJR annual reports or categorical grades provided by ODEP. The heterogeneity in implanted constructs in females compared to males is aptly illustrated, as is the paucity of information in clinically relevant sub-strata. The marked differences in outcomes between the different age/gender sub-strata confirm the importance of comparing prosthesis constructs within these strata.[12] We present this study as a novel way of assessing hip prosthesis constructs and as such there is, in the authors opinion, no relevant evidence published to date.

What is most striking is that so few prosthesis constructs in each age/gender strata meet the criteria of 500 cases at each time point and are at least classified as “inferiority not shown”. Of the 4,442 constructs used, only 7 meet these criteria in males aged 55-75 years (supplementary figure 5b) and 9 in females aged 55-75 years at 10 years (supplementary figure 9b). None meet the criteria in any other age/gender sub-strata at 10 years. Even at the relatively short follow-up of 5 years, only 16 constructs in men (supplementary figure 3c) and 12 in women age 55-75 years (supplementary figure 7c) meet these criteria. Patients would have a reasonable expectation that the implants they receive have a proven track record and have not been demonstrated as having a 20% or more increased revision rate for patients of the same age and gender. It is important to note that some prosthesis constructs have a higher early relative failure rate and a lower relative failure rate in later years and thus are inferior at 3 and 5 years, but non-inferior at 7 and 10 years. Examples of this in men aged 55-75 years are the MoP Corail/Pinnacle and MoP Exeter/Contemporary hooded. Late failure is preferential to early failure from the patient, societal and health economic perspectives, particularly as revision is unfortunately associated with a high rate of re-revision.[16]

One of the most obvious trends across all stratifications is the outstanding performance of the Exeter V40 stem as part of various prosthesis constructs. However, the heterogeneity in acetabular prostheses paired with the Exeter V40 stem is substantial, as is the subsequent variation in performance. This aptly illustrates the need to benchmark constructs opposed to individual implants which make up prosthesis constructs, which has the potential to provide false reassurance in terms of efficacy as the individual elements of a construct are not independent. Patient specific construct

1  
2  
3 selection is another strong feature of the data, with the majority of younger patient receiving CoC  
4 bearing surfaces, whereas the majority of older patients receive MoP bearing surfaces.  
5

6  
7 This analysis does show that certain constructs are either the reference or are non-inferior to the  
8 reference prosthesis construct across almost all age and gender strata. This strongly suggests that  
9 they could appropriately be used as default options for the majority of patients. This is particularly  
10 relevant for inexperienced surgical teams, as they can focus training on, and become expert with, a  
11 single prosthesis construct. This has the potential to reduce the risk of technical error, to be cost  
12 saving through bulk purchasing arrangements and via a reduction in failure rates. The absolute level  
13 of failure of commonly used constructs is relatively low, and less than 5% in many instances. This  
14 apparently excellent (ODEP 10A\*) performance is exhibited by nearly all prosthesis constructs with  
15 sufficient data at 10 years ( $\geq 500$  patients at risk) and raises questions about whether an externally  
16 placed benchmark is the optimal way to ensure best care.  
17  
18  
19  
20  
21  
22

23 Encouragingly, the sensitivity analysis demonstrates the prognosis for patients undergoing hip  
24 replacement is continually improving, and the currently best performing implant at 10 years is  
25 unlikely to be as good as the contemporary references at 3, 5, and 7 years when these reach 10  
26 years of follow up. Whilst the refinement of clinical practice and development of prosthesis  
27 constructs appears to be raising the bar in performance, it is clear that these improvements are not  
28 universal. This raises questions about how implants are introduced into a market safely; ensuring  
29 enough prosthesis constructs are implanted to ascertain their relative performance, but no more  
30 than the necessary number of prosthesis constructs are implanted to minimise the exposure of  
31 patients to poor performing implants, and finally to ensure there is sufficient incentive for implant  
32 manufacturers to develop new prostheses that benefit patients.  
33  
34  
35  
36  
37  
38

39 This analysis has a number of important strengths. We explicitly compare prosthesis constructs to a  
40 contemporary reference, and a historical defined reference with known performance using a non-  
41 inferiority study design. The unambiguous presentation of data allows surgeons, patients and policy  
42 makers to directly compare commonly used prosthesis constructs to a reference construct. We  
43 illustrate the paucity of information in clinically relevant sub-strata and the need to compare implant  
44 constructs opposed to implant elements. The analysis has a number of limitations; case-mix  
45 adjustment by stratification is difficult to assimilate despite the restricted set of confounding factors.  
46 Residual and unmeasured confounding factors are likely to be present, and the ability to interpret  
47 analyses from a causal perspective is limited. The number of patients remaining at risk after  
48 extended follow up is low, and therefore the power to detect non-inferiority assuming there is truly  
49 no difference in prosthesis constructs compared to the reference is also low. Data entry is mandated  
50  
51  
52  
53  
54  
55  
56  
57  
58  
59  
60

1  
2  
3 and data capture is extremely high (over 95%),[17] thus the findings in this study are highly likely to  
4 be generalisable.  
5

### 6 **Conclusions, policy and future research implications**

7  
8 The use of product benchmarking has the potential to be highly informative for patients, change the  
9 practice of surgeons, and influence policy makers if presented clearly and unambiguously. The use of  
10 a contemporary reference prosthesis construct is essential to ensure that benchmarks are clinically  
11 relevant.  
12  
13  
14  
15  
16  
17  
18  
19  
20  
21  
22  
23  
24  
25  
26  
27  
28  
29  
30  
31  
32  
33  
34  
35  
36  
37  
38  
39  
40  
41  
42  
43  
44  
45  
46  
47  
48  
49  
50  
51  
52  
53  
54  
55  
56  
57  
58  
59  
60

For peer review only



### **Acknowledgments**

We thank the patients and staff of all the hospitals who have contributed data to the National Joint Registry. We are grateful to the Healthcare Quality Improvement Partnership, the National Joint Registry Steering Committee, and staff at the National Joint Registry for facilitating this work. The views expressed represent those of the authors and do not necessarily reflect those of the NHS, the National Institute for Health Research, the Department of Health, the National Joint Registry Steering Committee or Healthcare Quality Improvement Partnership, who do not vouch for how the information is presented.

### **Funding**

Posts of members of the research team are funded by a contract grant from the National Joint Registry for England, Wales, Northern Ireland and the Isle of Man. This study was also supported by the NIHR Biomedical Research Centre at the University Hospitals Bristol NHS Foundation Trust and the University of Bristol. AS is funded by an MRC Strategic Skills Fellowship MR/L01226X/1.

### **Competing interest statement**

All authors have completed the Unified Competing Interest form at [www.icmje.org/coi\\_disclosure.pdf](http://www.icmje.org/coi_disclosure.pdf) (available on request from the corresponding author) and declare: funding was received for the submitted work as described in the Funding statement; no financial relationships with any organisations that might have an interest in the submitted work in the previous three years, no other relationships or activities that could appear to have influenced the submitted work.

### **Author Contributions**

AS, MRW and AWB conceived the study. KD, AS and AWB designed the study. The data were extracted by Northgate (Hemel Hempstead, UK). KD and AS managed and analysed data. MRW, AS, MLP and AWB reviewed the published work. All authors critically inputted into final design of the study, interpreted the data and co-wrote the manuscript. AS is the guarantor and attests on behalf of the authors that the manuscript is a true and transparent reflection of the study without omissions.

### **Role of the funding source**

The sponsor of the study had no role in the study design, data collection, analysis, interpretation, or writing of the final report. KD and AS had full access to all of the data and AS had final responsibility for manuscript submission.

### **Ethical approval**

1  
2  
3 Not required for this study. Patient data in the NJR is only available by consent of the patient.  
4

5 **Data sharing**  
6

7 Access to data is available from the National Joint Registry for England and Wales  
8  
9  
10  
11  
12  
13  
14  
15  
16  
17  
18  
19  
20  
21  
22  
23  
24  
25  
26  
27  
28  
29  
30  
31  
32  
33  
34  
35  
36  
37  
38  
39  
40  
41  
42  
43  
44  
45  
46  
47  
48  
49  
50  
51  
52  
53  
54  
55  
56  
57  
58  
59  
60

For peer review only

1  
2  
3 **Figures**

4 **Figure 1: Schematic representation of inferiority and non-inferiority**

5  
6 **Figure 2: Difference in failure of implanted constructs compared to a contemporary reference at 3**  
7 **years, using all stem-cup combinations with  $\geq 500$  procedures remaining at risk.**

8  
9 **Figure 3: Difference in failure of implanted constructs compared to a contemporary reference at 5**  
10 **years, using all stem-cup combinations with  $\geq 500$  procedures remaining at risk.**

11  
12 **Figure 4: Difference in failure of implanted constructs compared to a contemporary reference at 7**  
13 **years, using all stem-cup combinations with  $\geq 500$  procedures remaining at risk.**

14  
15 **Figure 5: Difference in failure of implanted constructs compared to a contemporary reference at**  
16 **10 years, using all stem-cup combinations with  $\geq 500$  procedures remaining at risk.**

## References

1. Warden J. Warning issued over hip implants. *BMJ* 1998;316(7132):650.
2. Smith AJ, Dieppe P, Howard PW, et al. Failure rates of metal-on-metal hip resurfacings: analysis of data from the National Joint Registry for England and Wales. *Lancet* 2012;380(9855):1759-66. doi: 10.1016/S0140-6736(12)60989-1
3. NJR Steering Committee. National Joint Registry for England, Wales, Northern Ireland and the Isle of Man: 13th Annual Report. Hemel Hempstead, 2016
4. Tucker K. Orthopaedic Data Evaluation Panel: ODEP. Northgate Public Services (UK) Ltd. 2017 [Available from: <http://www.odep.org.uk/ODEPProcess/ODEPStatement.aspx>.
5. Nederlandse Orthopaedische Vereniging. Classification Orthopaedic Implants: NOV Total Knee Prosthesis 2016-2017 [Available from: <https://www.orthopeden.org/downloads/146/classificatie-knie-2017.pdf>.
6. Prostheses and Devices Committee (PDC) and Prostheses List Advisory Committee (PLAC) Bulletins. Australian Government; Department of Health [Available from: <http://www.health.gov.au/internet/main/publishing.nsf/Content/health-privatehealth-prostheselist.htm>.
7. NJR Reports Prosthesis document. National Joint Registry (NJR), 2016 [Available from: <http://www.njrreports.org.uk/Portals/0/PDFdownloads/NJR%2013th%20AR%20Prostheses%20used%20in%20joint%20replacements%202015.pdf>.
8. Sayers A, Crowther MJ, Judge A, et al. Determining the sample size required to establish whether a medical device is non-inferior to an external benchmark. *BMJ Open* 2017;7(8):e015397. doi: 10.1136/bmjopen-2016-015397 [published Online First: 2017/08/31]
9. Schumi J, Wittes JT. Through the looking glass: understanding non-inferiority. *Trials* 2011;12:106. doi: 10.1186/1745-6215-12-106
10. Tunes da Silva G, Logan BR, Klein JP. Methods for equivalence and noninferiority testing. *Biol Blood Marrow Transplant* 2009;15(1 Suppl):120-7. doi: 10.1016/j.bbmt.2008.10.004
11. Com-Nougue C, Rodary C, Patte C. How to establish equivalence when data are censored: a randomized trial of treatments for B non-Hodgkin lymphoma. *Stat Med* 1993;12(14):1353-64.
12. Bayliss LE, Culliford D, Monk AP, et al. The effect of patient age at intervention on risk of implant revision after total replacement of the hip or knee: a population-based cohort study. *Lancet* 2017;389(10077):1424-30. doi: 10.1016/S0140-6736(17)30059-4
13. Smith AJ, Dieppe P, Vernon K, et al. Failure rates of stemmed metal-on-metal hip replacements: analysis of data from the National Joint Registry of England and Wales. *Lancet* 2012;379(9822):1199-204. doi: 10.1016/S0140-6736(12)60353-5
14. Greenwood M. The natural duration of cancer. *Rep Public Health Med Subj (Lond)* 1926;33: 1-26
15. Donken R, de Melker HE, Rots NY, et al. Comparing vaccines: a systematic review of the use of the non-inferiority margin in vaccine trials. *Vaccine* 2015;33(12):1426-32. doi: 10.1016/j.vaccine.2015.01.072
16. Hunt LP WM, Beswick A, Porter ML, Howard P, Blom AW. Implications of the Introduction of New Technology: Comparative Survivorship Modelling of Metal-on-Metal Hip Replacement to Contemporary Alternatives in the National Joint Registry. *J Bone Joint Surg Am* 2017, *In press*
17. NJR Data Quality Audit 2017 [Available from: <http://www.njrcentre.org.uk/njrcentre/NewsandEvents/DataQualityAudit-updateSeptember2017/tabid/1451/Default.aspx>.

1  
2  
3  
4  
5  
6  
7  
8  
9  
10  
11  
12  
13  
14  
15  
16  
17  
18  
19  
20  
21  
22  
23  
24  
25  
26  
27  
28  
29  
30  
31  
32  
33  
34  
35  
36  
37  
38  
39  
40  
41  
42  
43  
44  
45  
46  
47  
48  
49  
50  
51  
52  
53  
54  
55  
56  
57  
58  
59  
60

### Schematic representation of inferiority and non-inferiority

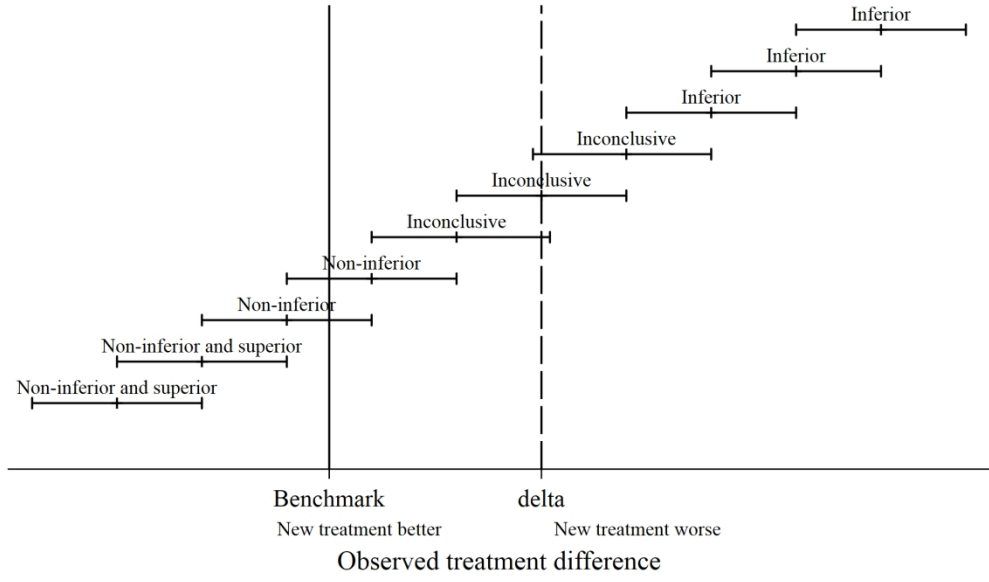

177x124mm (300 x 300 DPI)

All stem-cup combinations by bearing type at 3 years

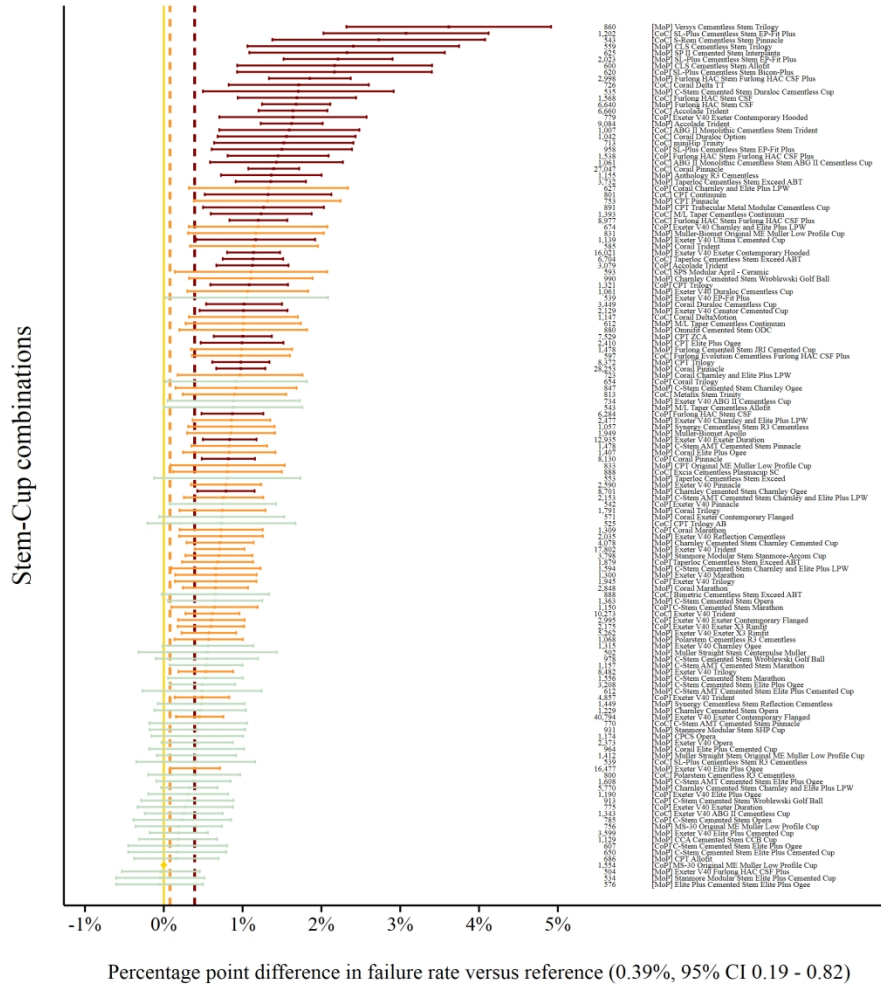

— Non-inferior   
 — Non-inferiority not shown   
 — Inferior by ≥20%   
 — Inferior by ≥100%   
 • Reference

203x254mm (300 x 300 DPI)

### All stem-cup combinations by bearing type at 5 years

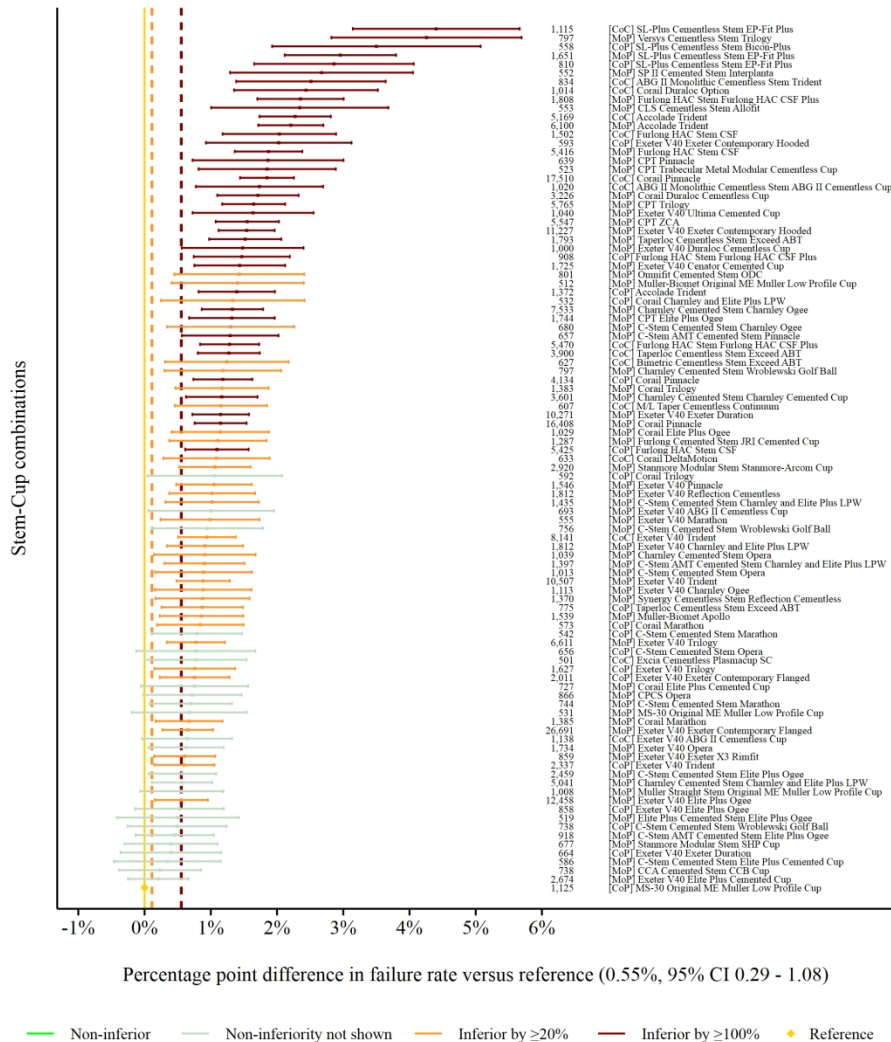

189x237mm (300 x 300 DPI)

### All stem-cup combinations by bearing type at 7 years

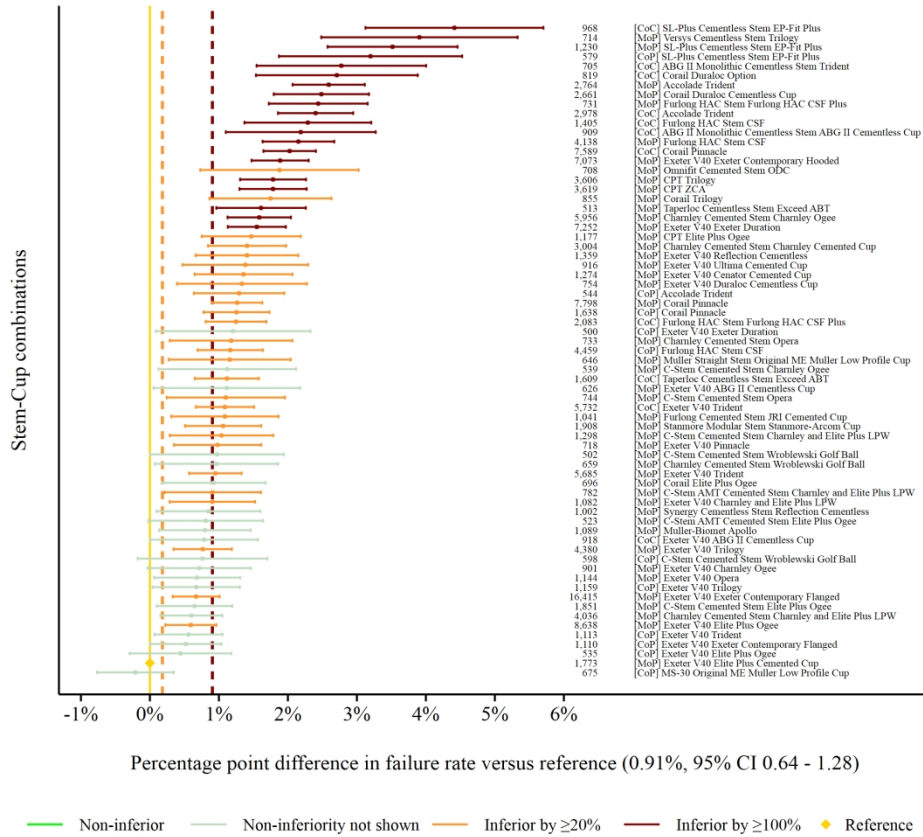

211x211mm (300 x 300 DPI)



1  
2  
3  
4  
5  
6  
7  
8  
9  
10  
11  
12  
13  
14  
15  
16  
17  
18  
19  
20  
21  
22  
23  
24  
25  
26  
27  
28  
29  
30  
31  
32  
33  
34  
35  
36  
37  
38  
39  
40  
41  
42  
43  
44  
45  
46  
47  
48  
49  
50  
51  
52  
53  
54  
55  
56  
57  
58  
59  
60

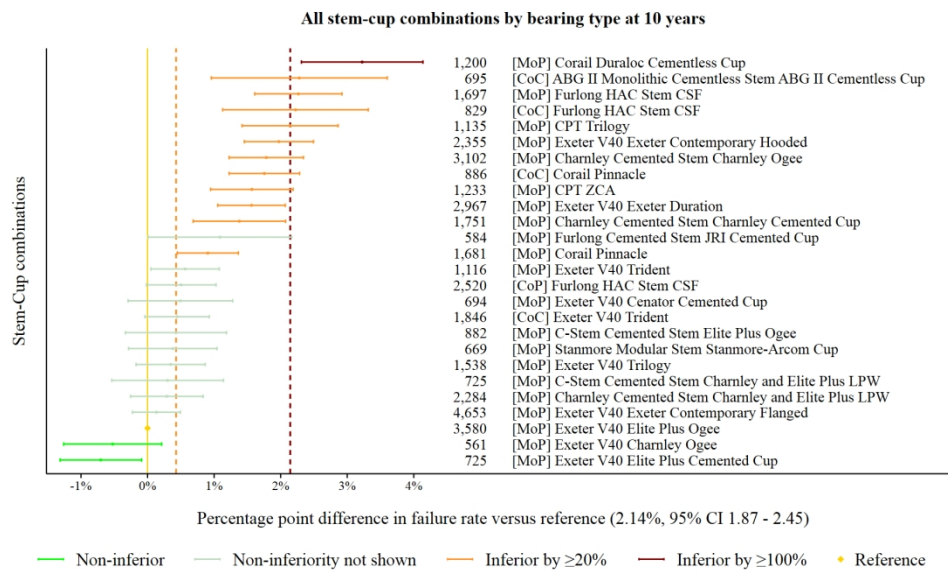

169x105mm (300 x 300 DPI)

Supplementary Figure 1: Flow diagram of showing derivation of procedures used in analyses

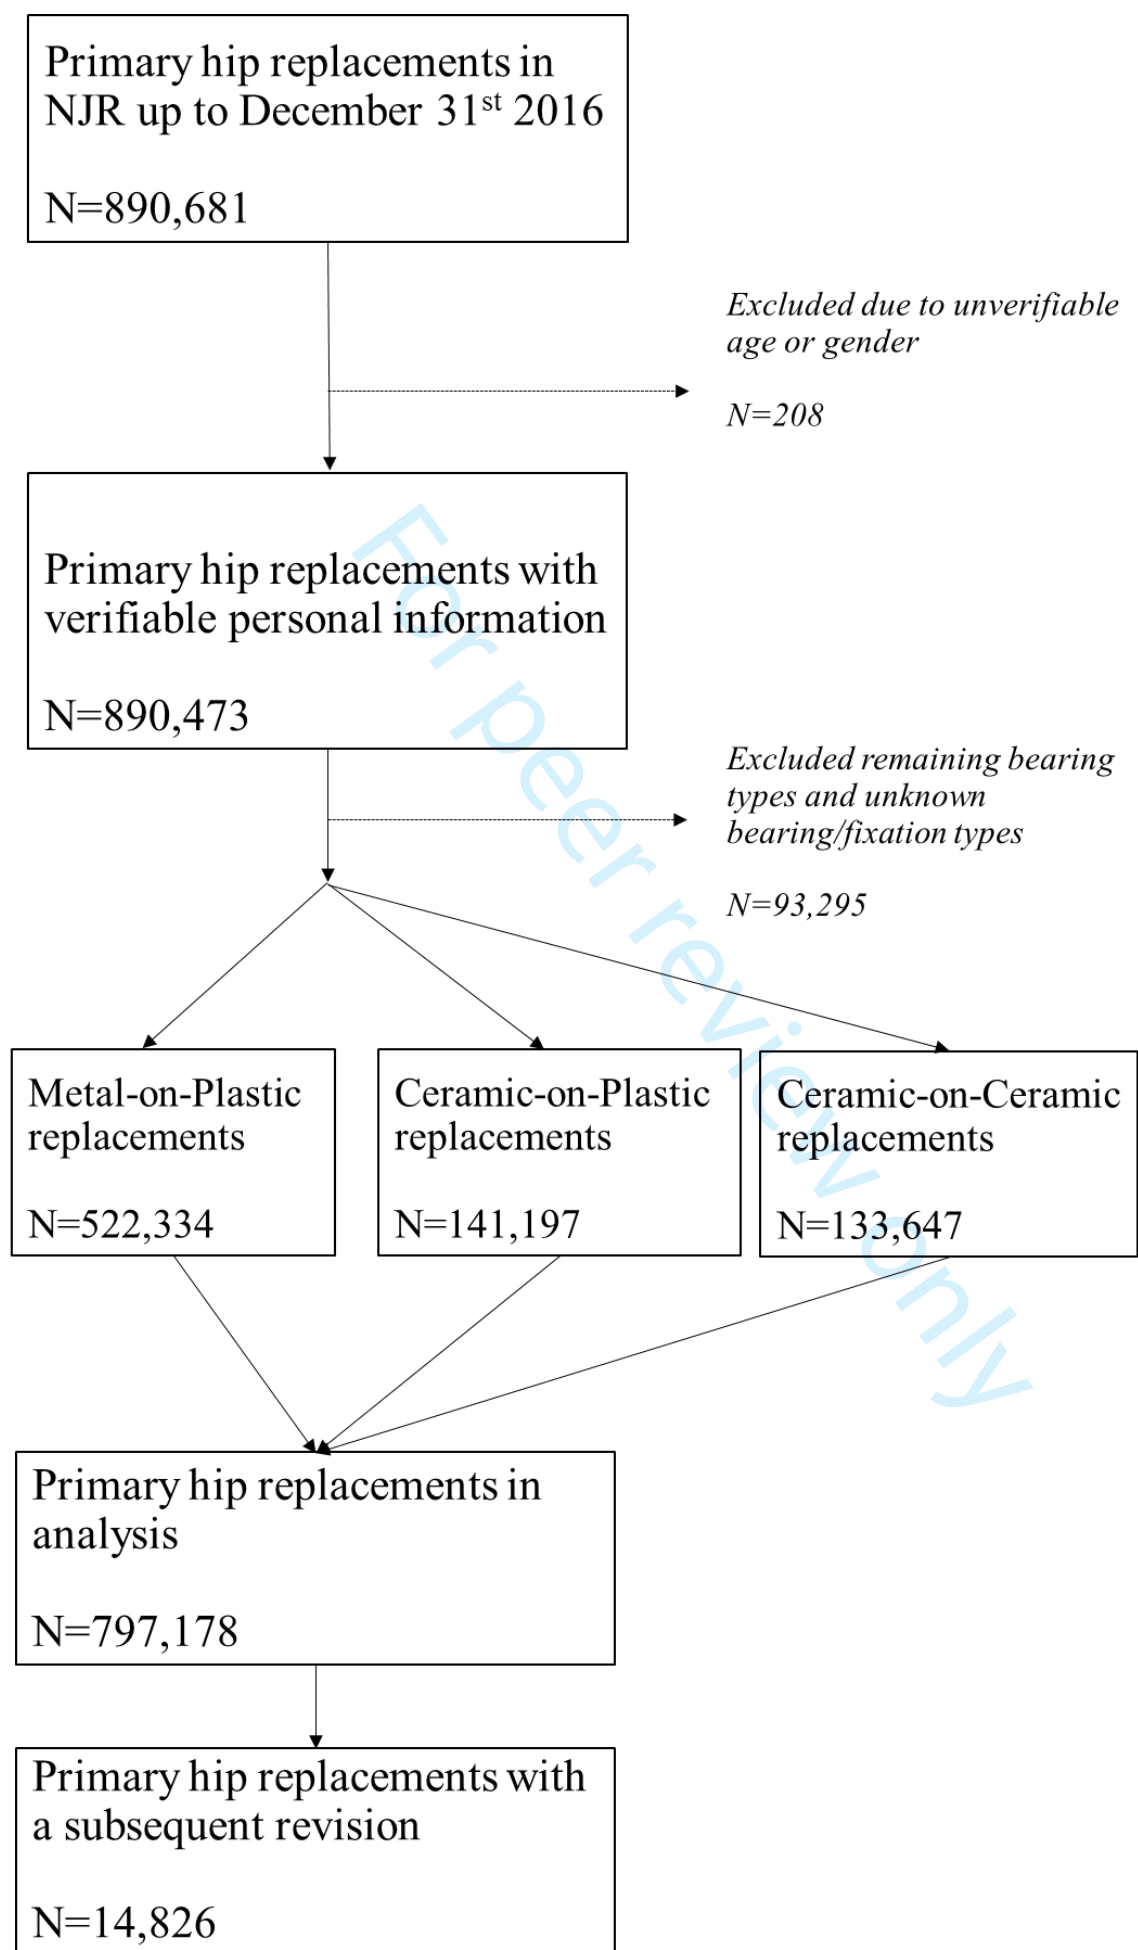

Supplementary Figure 2a: Difference in failure of implanted constructs compared to a contemporary reference at 3 years in men, using all stem-cup combinations with ≥500 procedures remaining at risk

1  
2  
3  
4  
5  
6  
7  
8  
9  
10  
11  
12  
13  
14  
15  
16  
17  
18  
19  
20  
21  
22  
23  
24  
25  
26  
27  
28  
29  
30  
31  
32  
33  
34  
35  
36  
37  
38  
39  
40  
41  
42  
43  
44  
45  
46

### All stem-cup combinations by bearing type at 3 years in Men

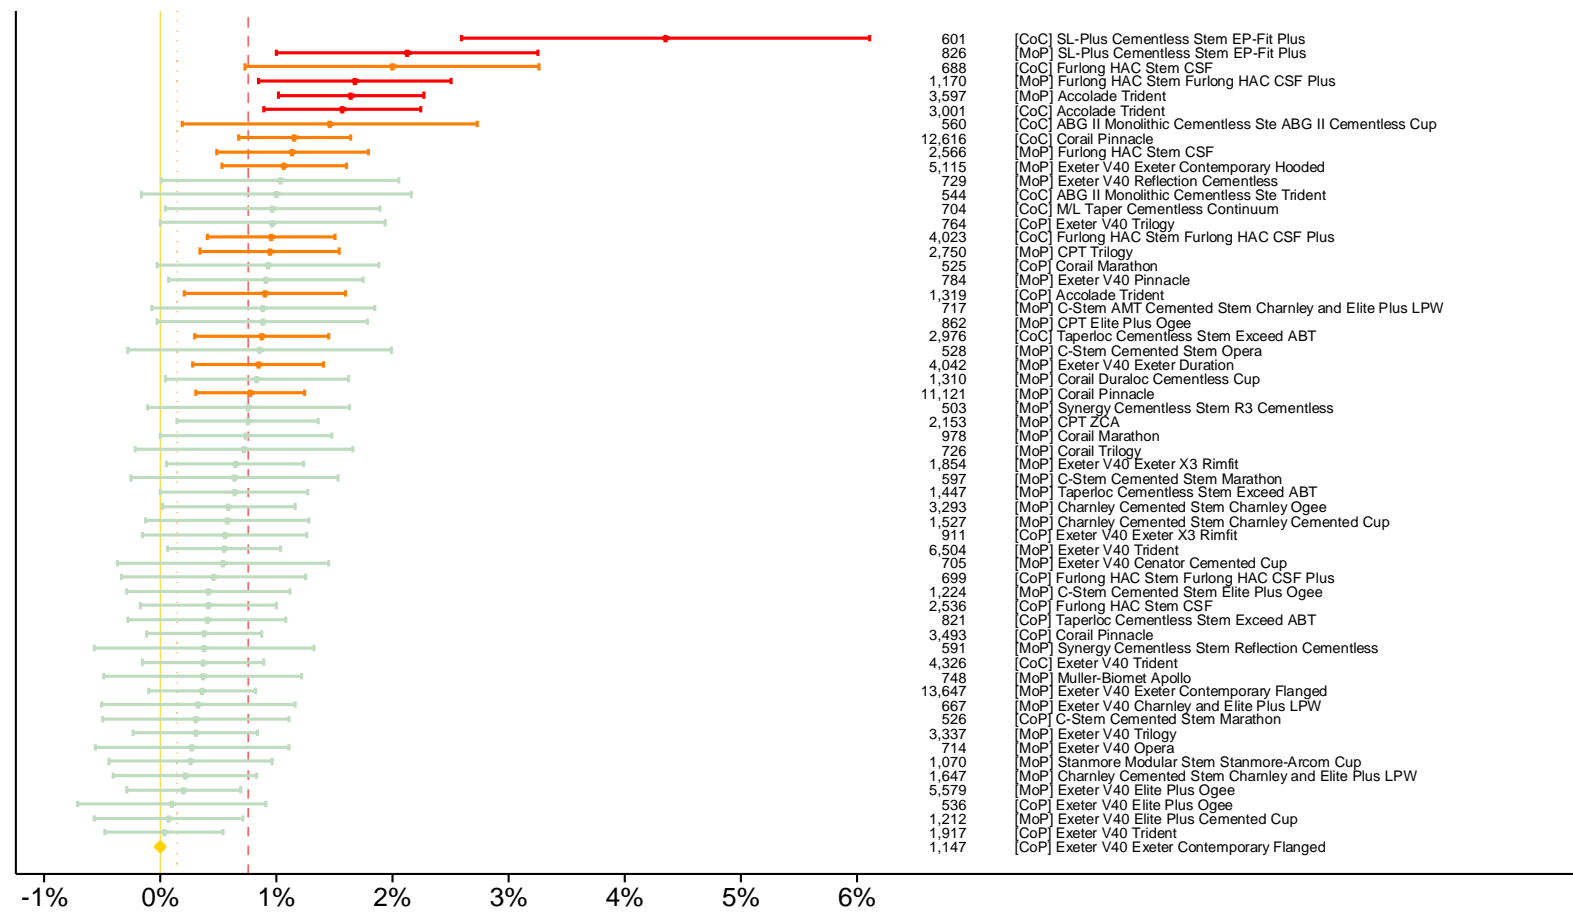

Percentage point difference in failure rate versus reference (0.76%, 95% CI 0.43 - 1.34)

— Non-inferior    
 — Non-inferiority not shown    
 — Inferior by ≥20%    
 — Inferior by ≥100%    
 ◆ Reference

Supplementary Figure 2b: Difference in failure of implanted constructs compared to a contemporary reference at 3 years in men less than 55 years, using all stem-cup combinations with  $\geq 500$  procedures remaining at risk

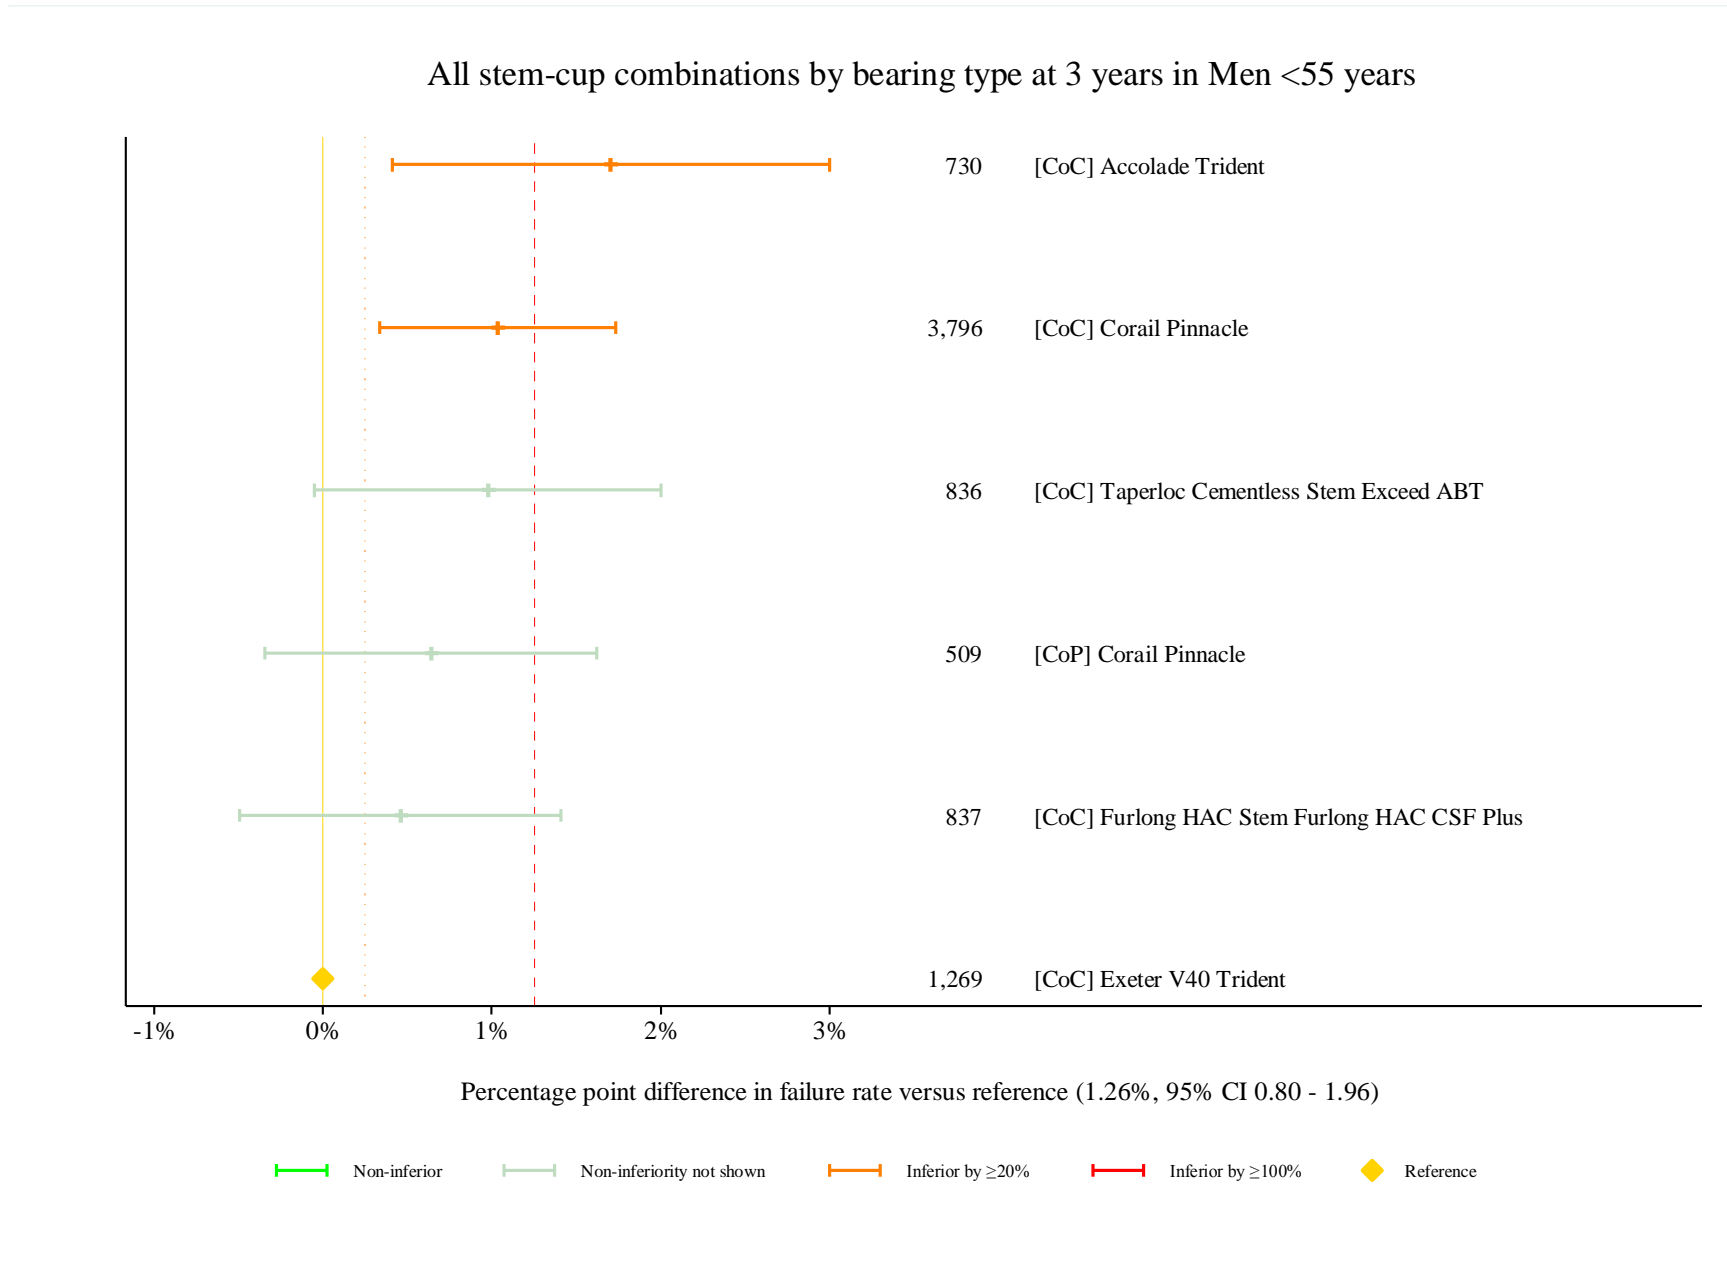

Supplementary Figure 2c: Difference in failure of implanted constructs compared to a contemporary reference at 3 years in men between 55 and 75 years, using all stem-cup combinations with ≥500 procedures remaining at risk

All stem-cup combinations by bearing type at 3 years in Men 55-75 years

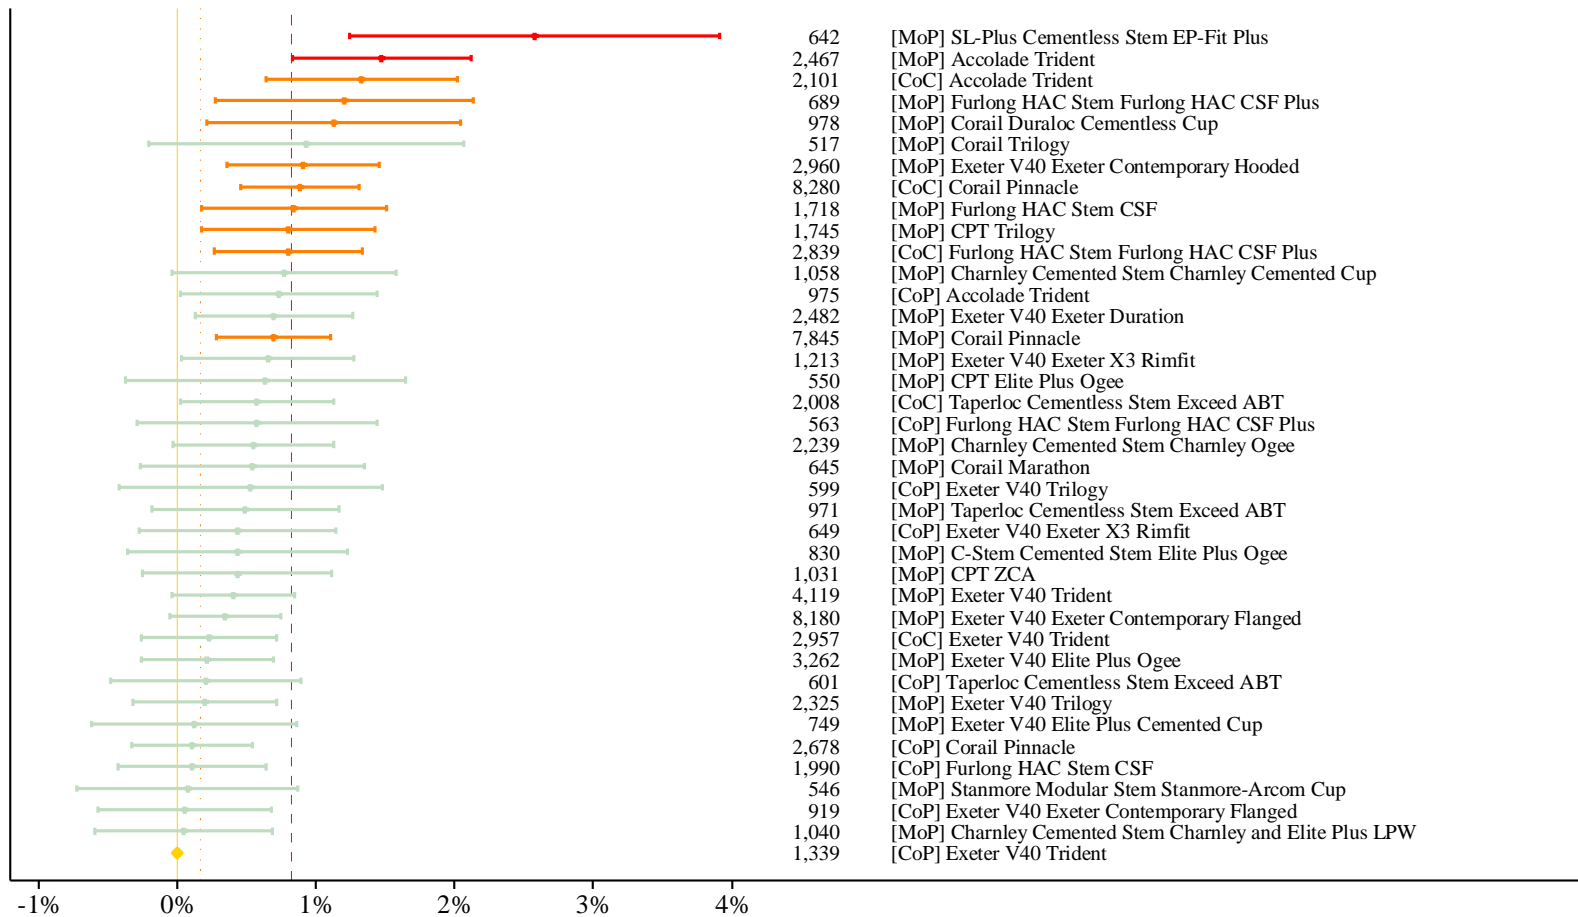

Percentage point difference in failure rate versus reference (0.83%, 95% CI 0.55 - 1.26)

Legend: Non-inferior (green), Non-inferiority not shown (light green), Inferior by ≥20% (orange), Inferior by ≥100% (red), Reference (yellow diamond)

Supplementary Figure 2d: Difference in failure of implanted constructs compared to a contemporary reference at 3 years in men greater than 75 years, using all stem-cup combinations with  $\geq 500$  procedures remaining at risk

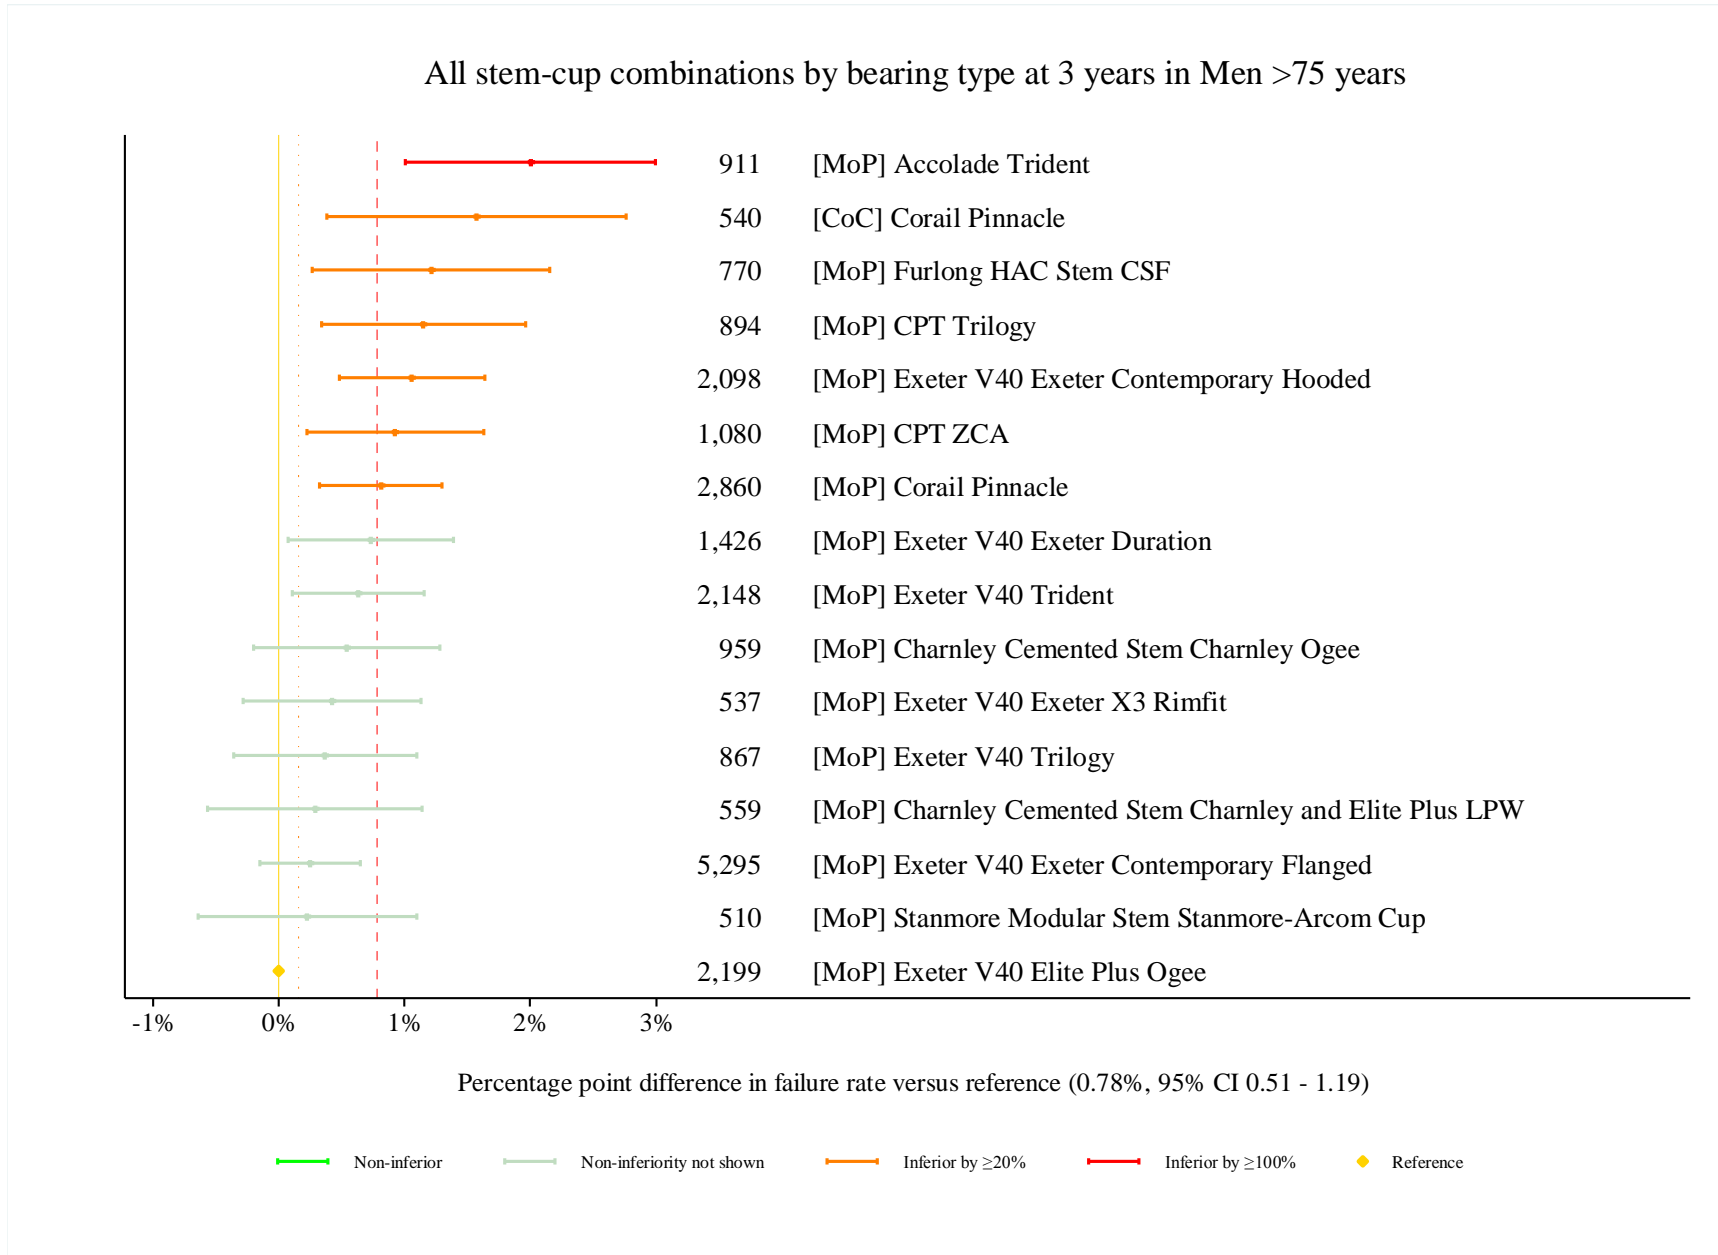

Supplementary Figure 3a: Difference in failure of implanted constructs compared to a contemporary reference at 5 years in men, using all stem-cup combinations with ≥500 procedures remaining at risk

All stem-cup combinations by bearing type at 5 years in Men

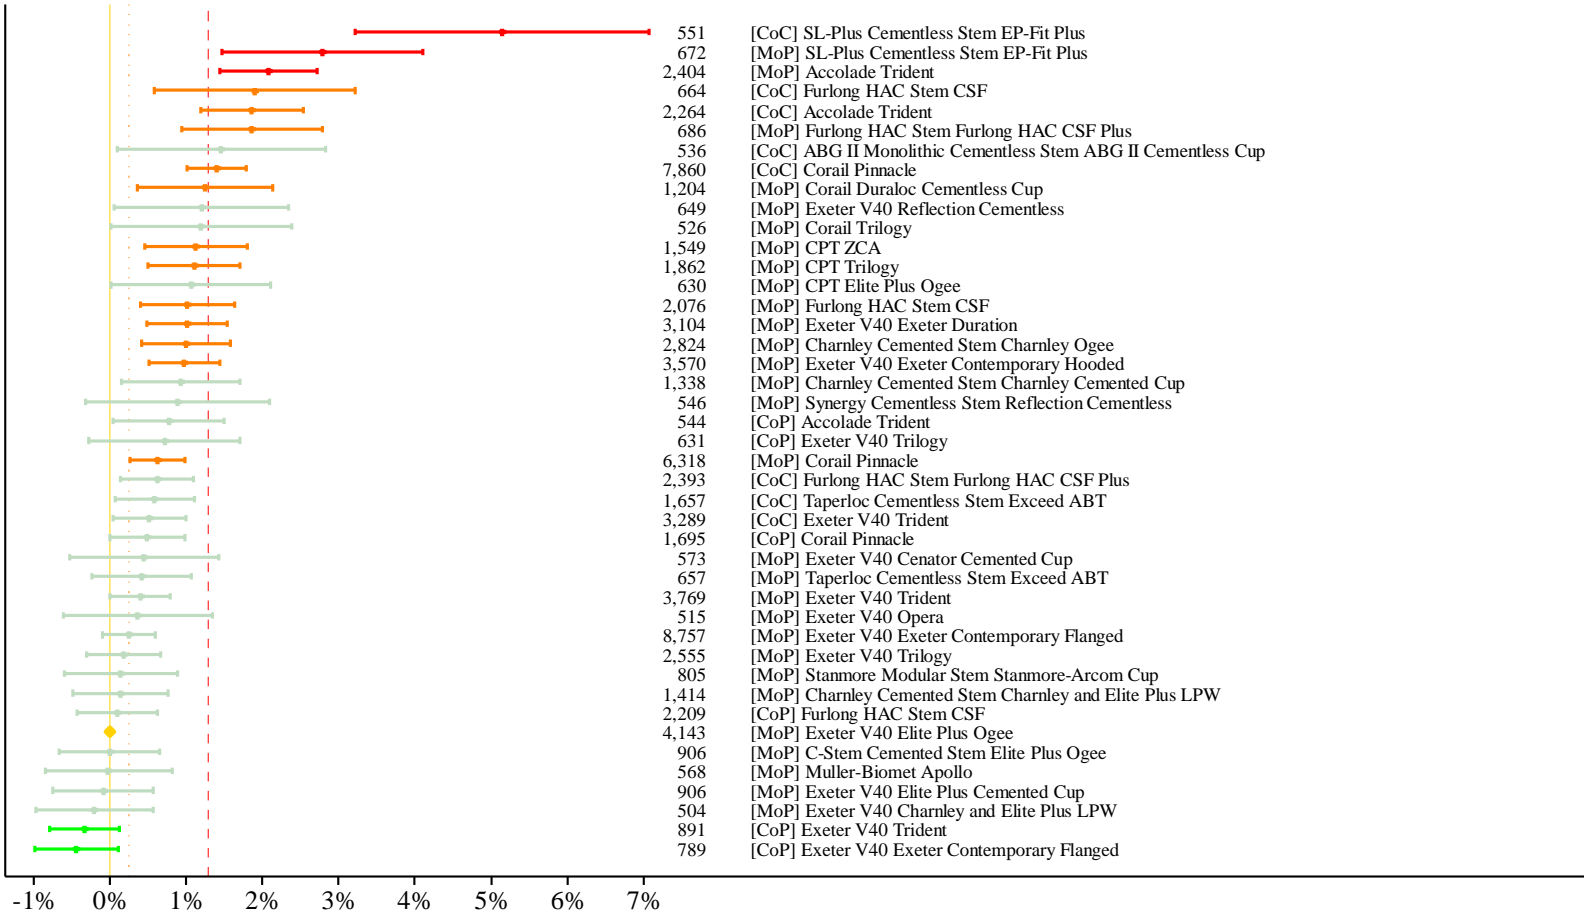

Percentage point difference in failure rate versus reference (1.29%, 95% CI 1.03 - 1.60)

Legend: Non-inferior (green), Non-inferiority not shown (grey), Inferior by ≥20% (orange), Inferior by ≥100% (red), Reference (yellow diamond)

Supplementary Figure 3b: Difference in failure of implanted constructs compared to a contemporary reference at 5 years in men less than 55 years, using all stem-cup combinations with  $\geq 500$  procedures remaining at risk

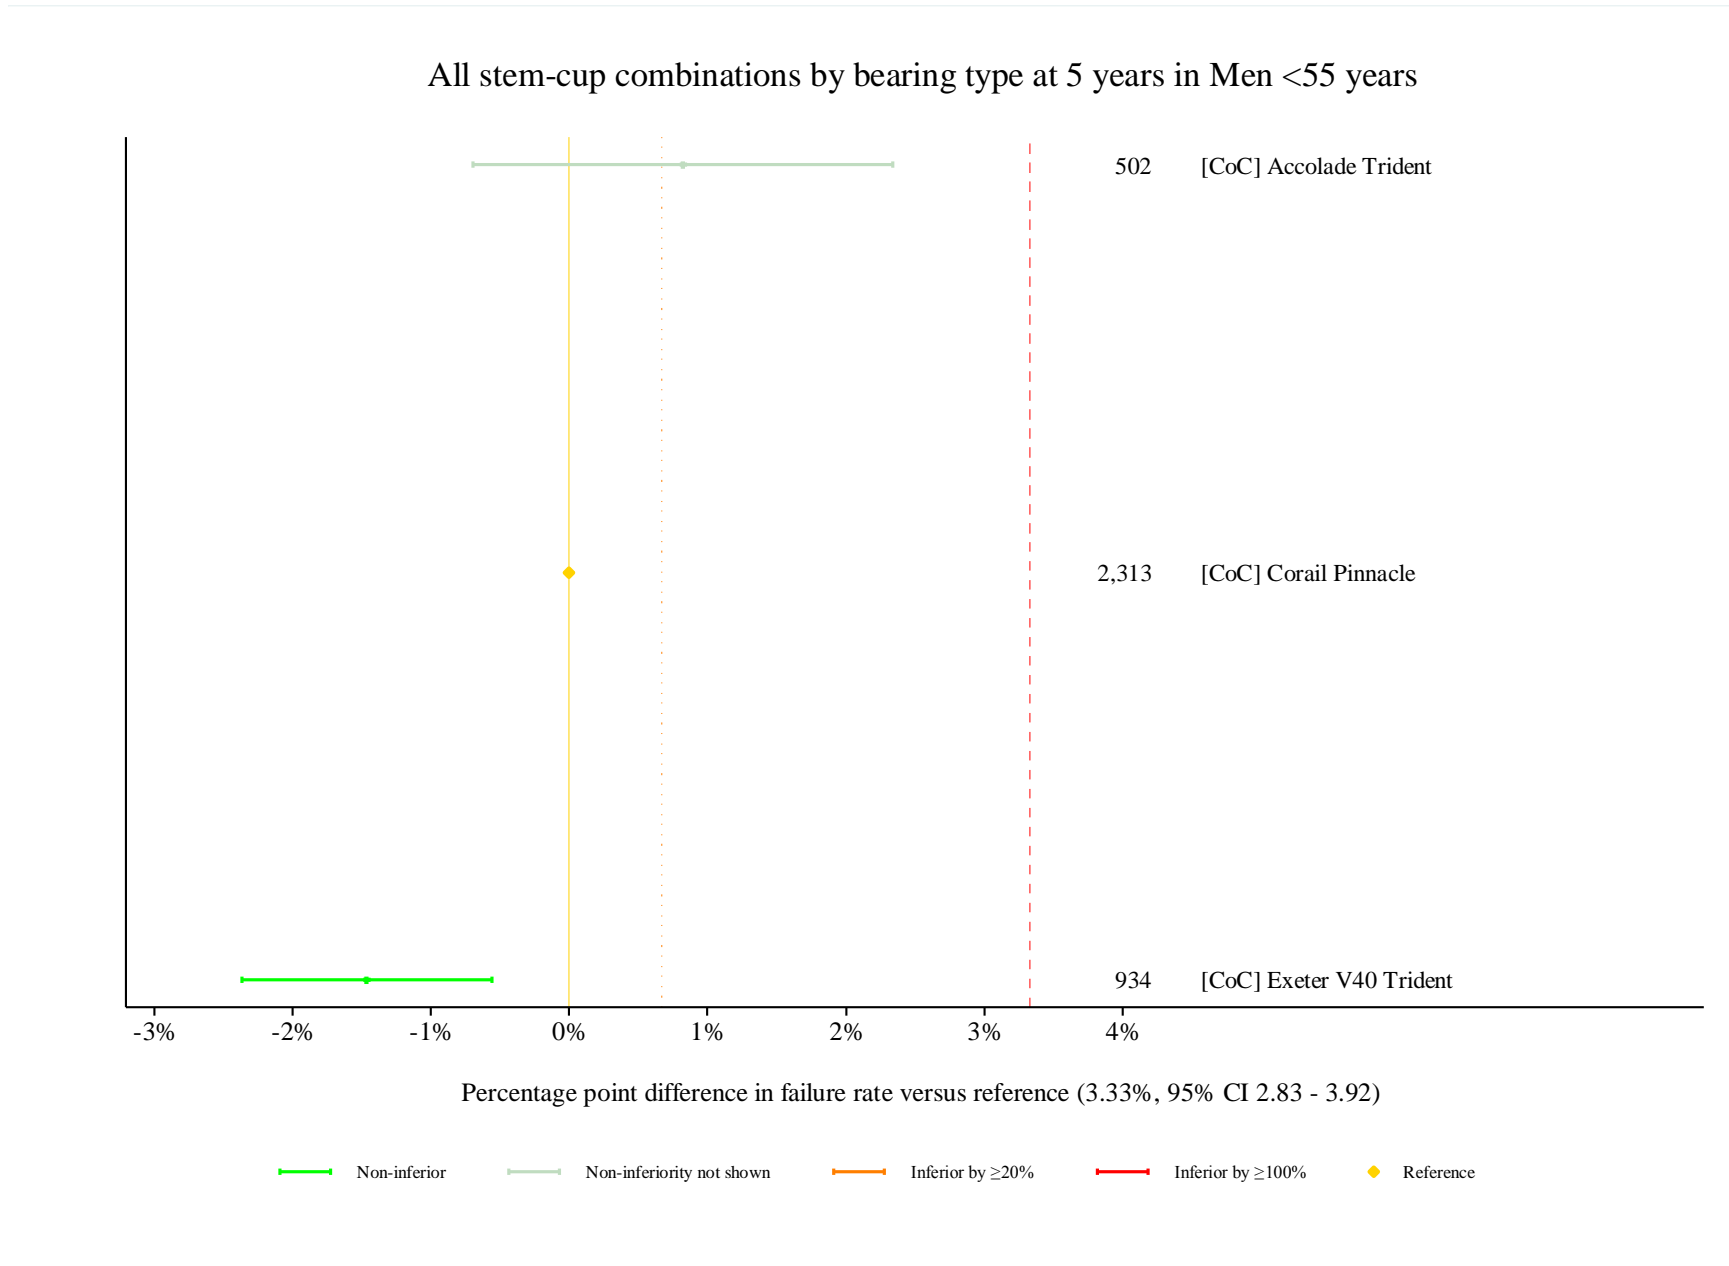



Supplementary Figure 3c: Difference in failure of implanted constructs compared to a contemporary reference at 5 years in men between 55 and 75 years, using all stem-cup combinations with ≥500 procedures remaining at risk

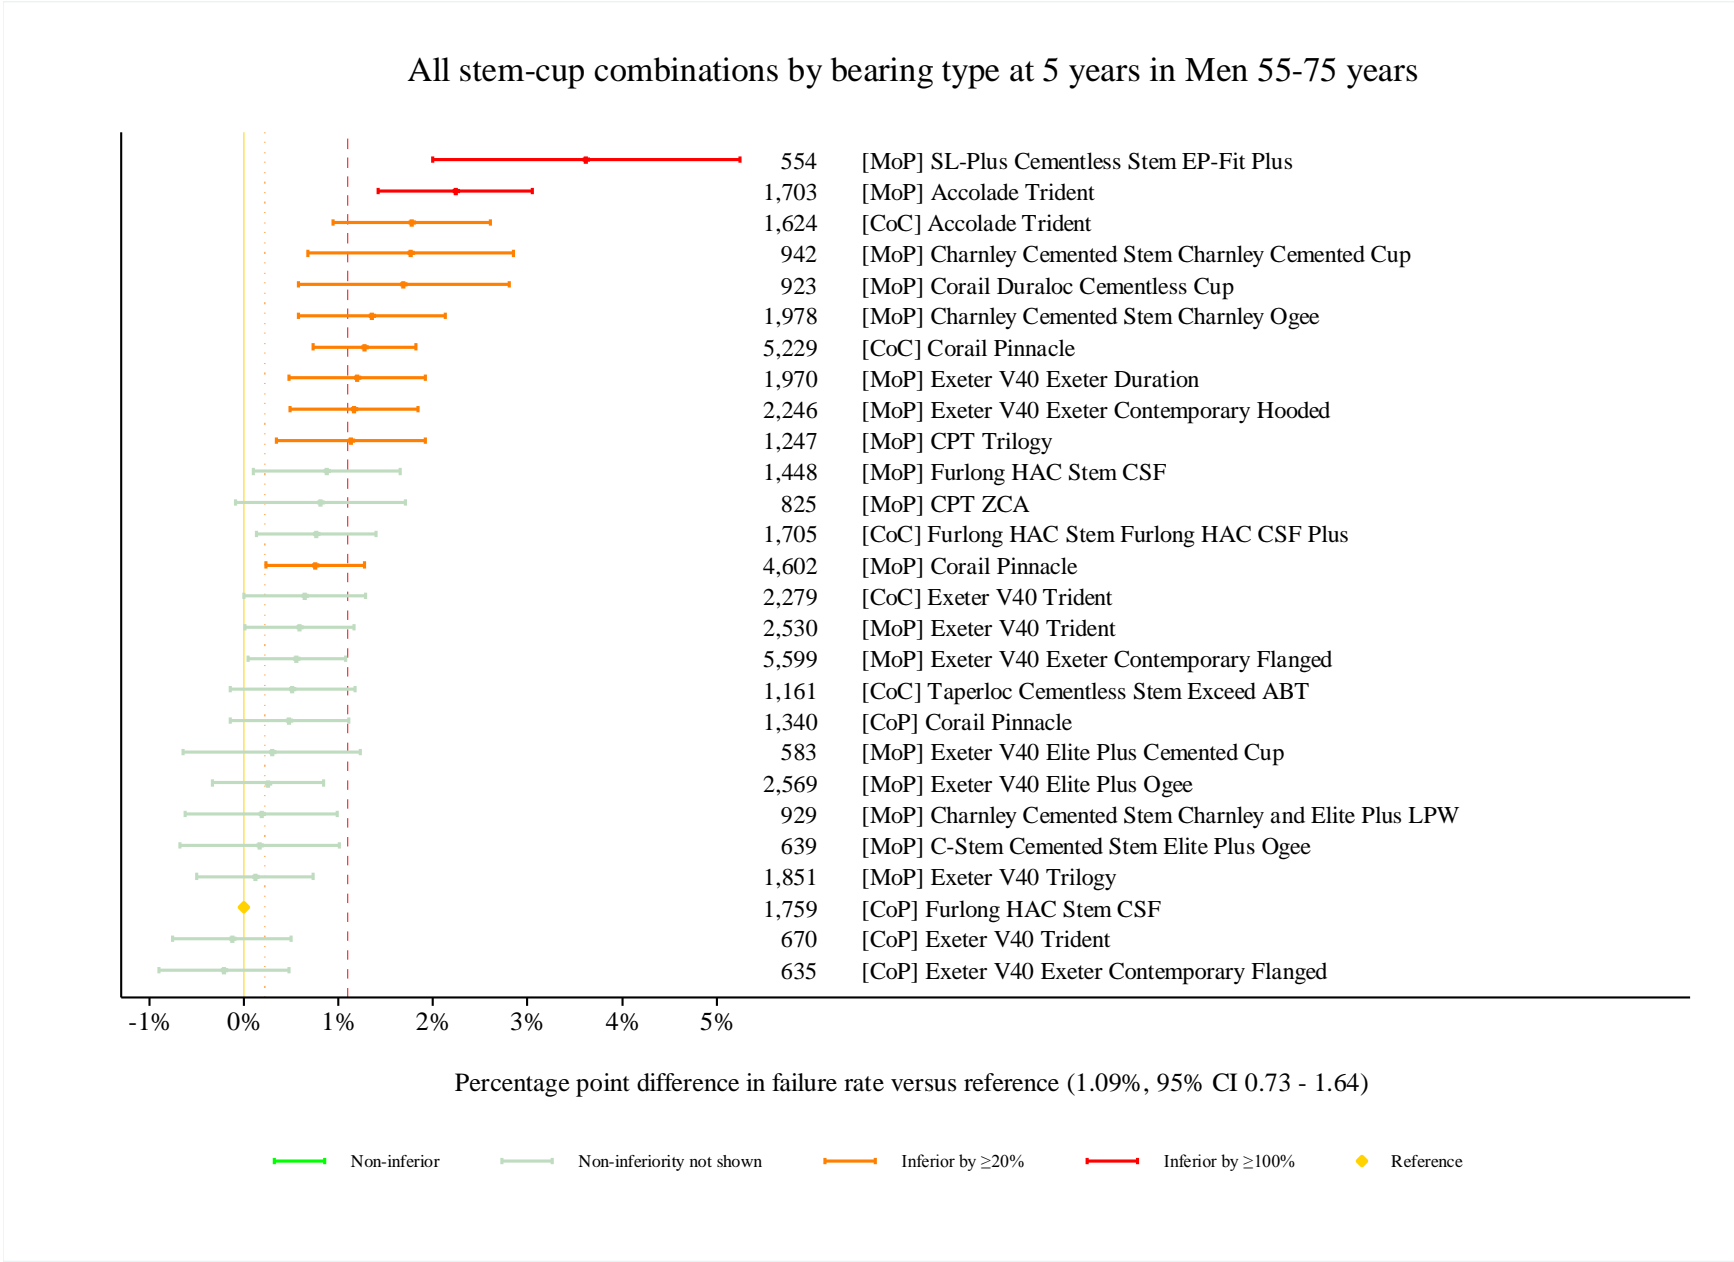

Supplementary Figure 3d: Difference in failure of implanted constructs compared to a contemporary reference at 5 years in men greater than 75 years, using all stem-cup combinations with  $\geq 500$  procedures remaining at risk

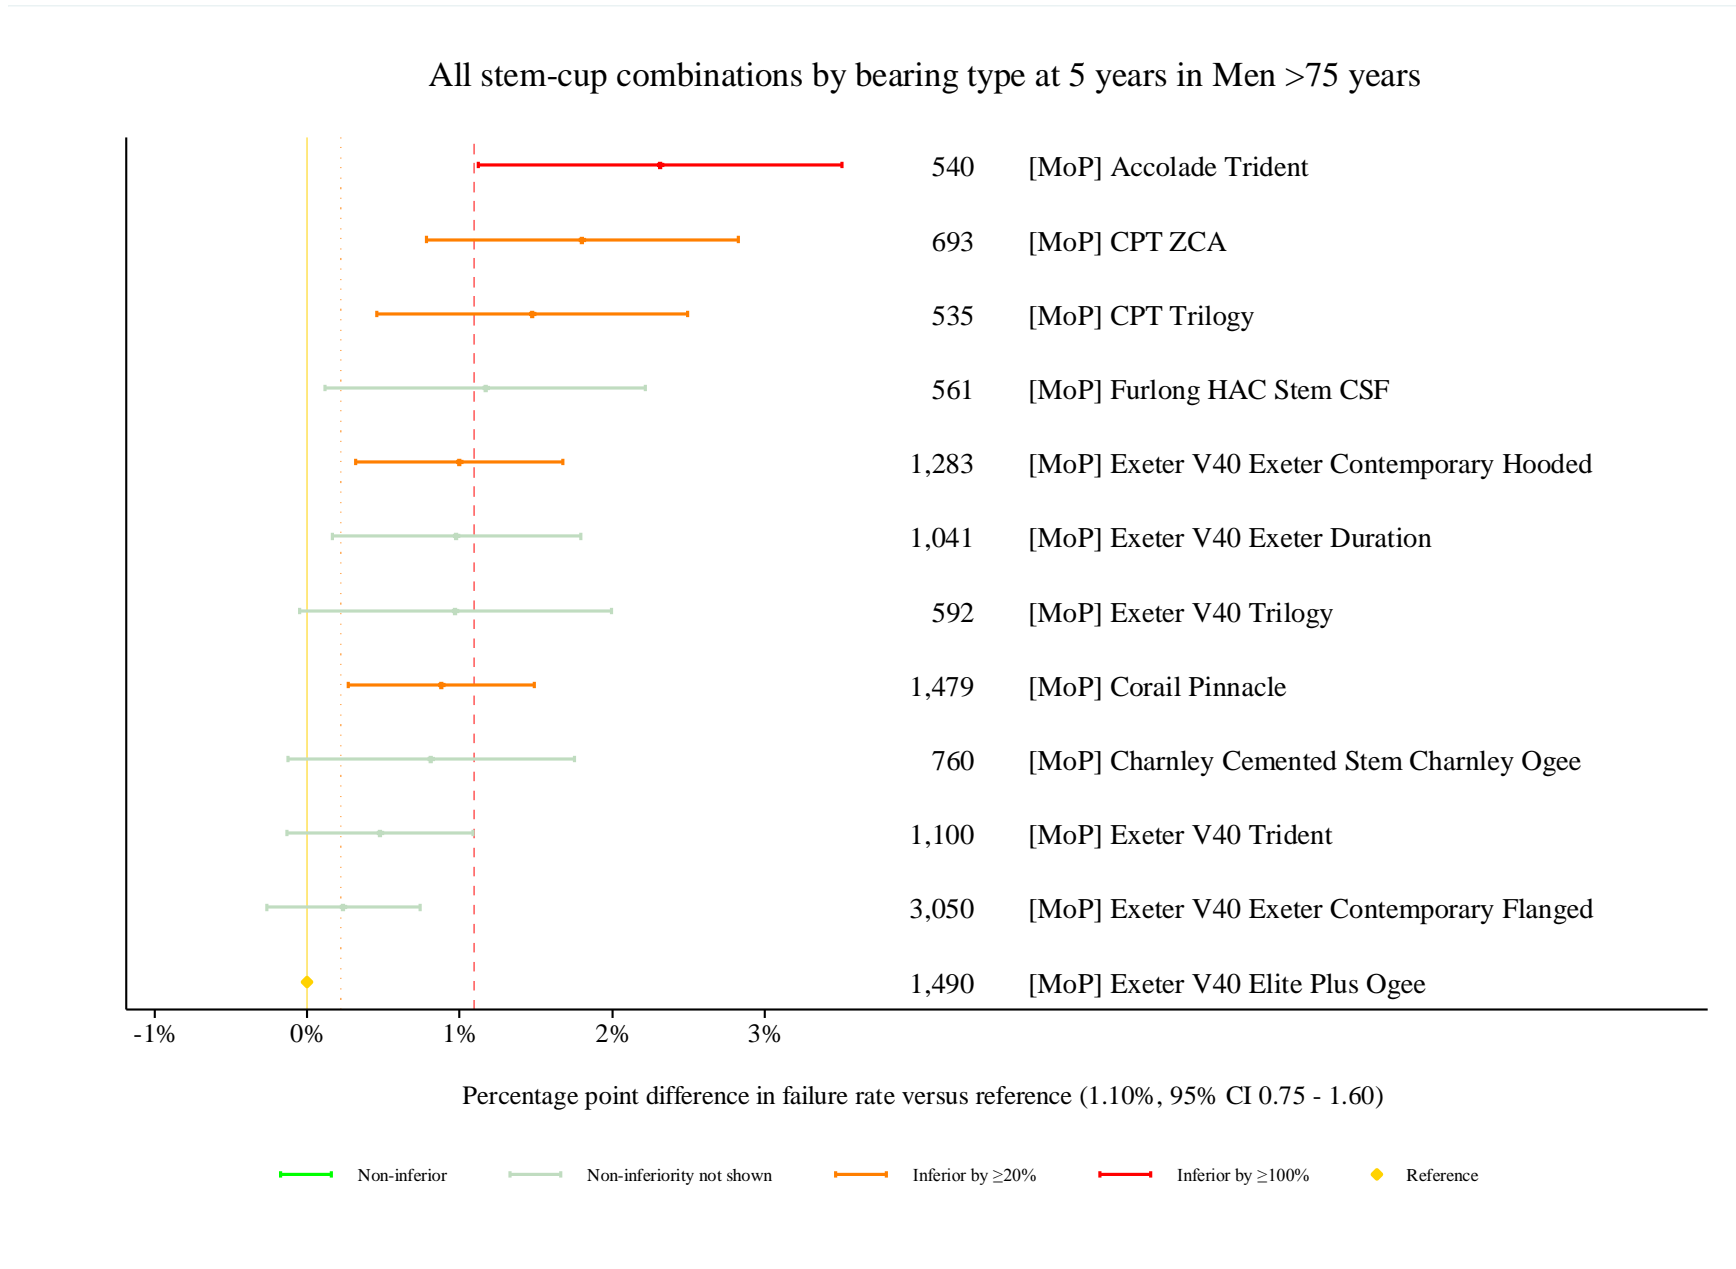

Supplementary Figure 4a: Difference in failure of implanted constructs compared to a contemporary reference at 7 years in men, using all stem-cup combinations with ≥500 procedures remaining at risk

All stem-cup combinations by bearing type at 7 years in Men

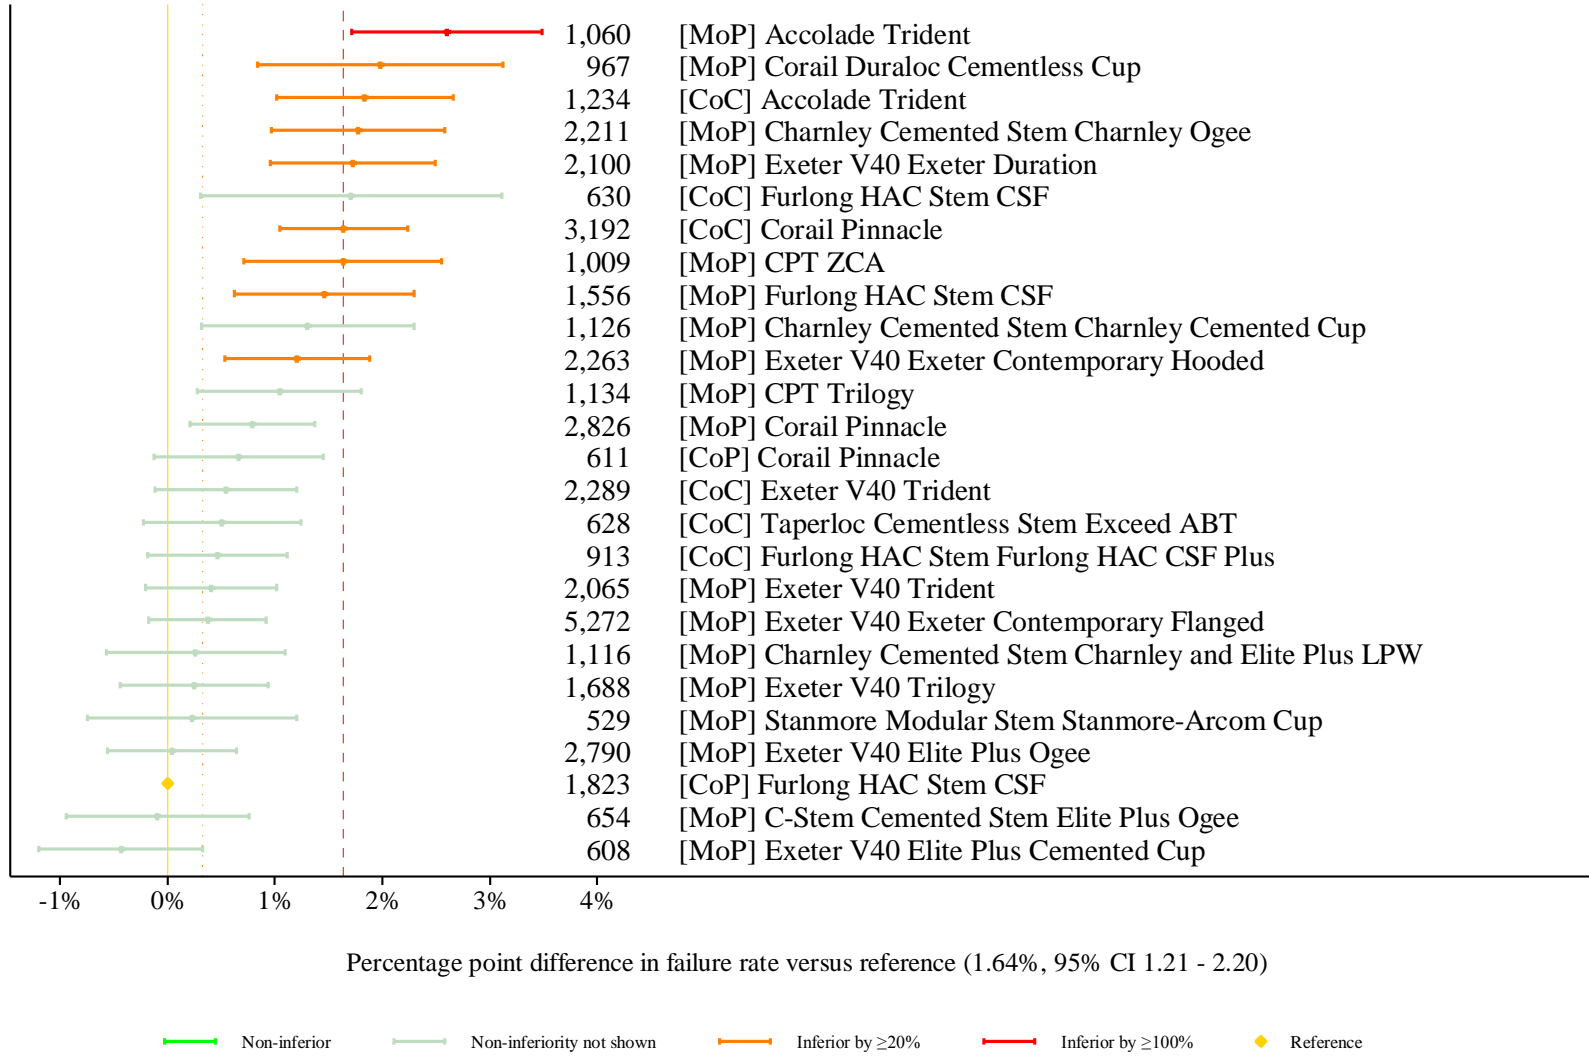

Supplementary Figure 4b: Difference in failure of implanted constructs compared to a contemporary reference at 7 years in men between 55 and 75 years, using all stem-cup combinations with  $\geq 500$  procedures remaining at risk

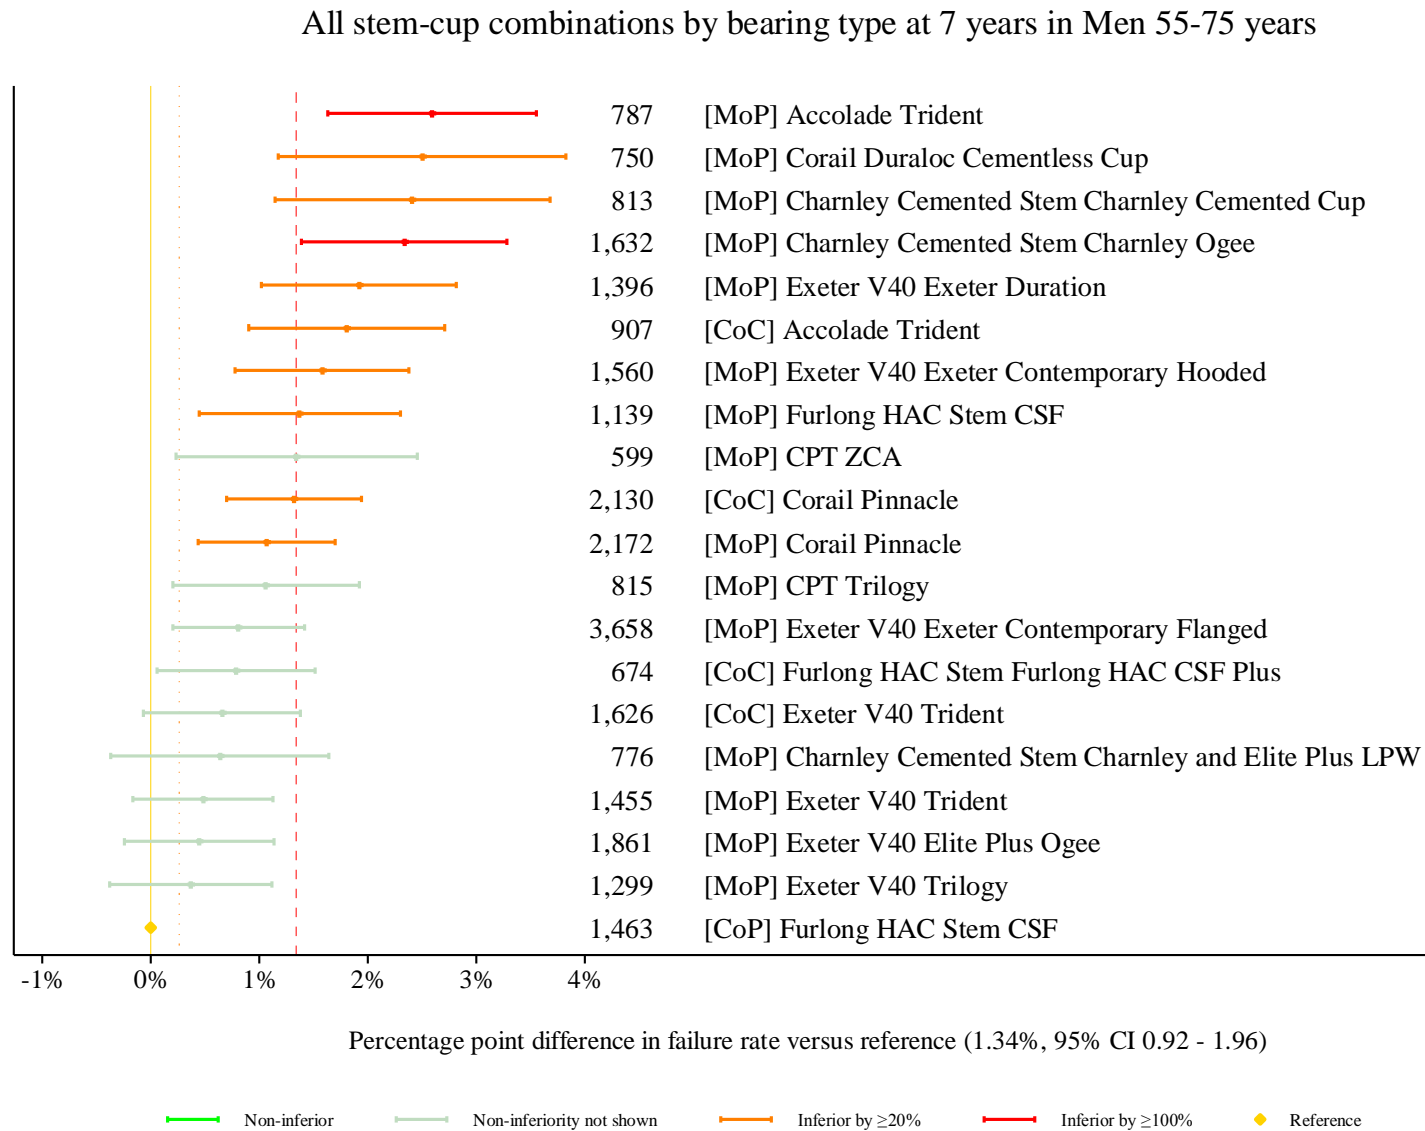

Supplementary Figure 4c: Difference in failure of implanted constructs compared to a contemporary reference at 7 years in men greater than 75 years, using all stem-cup combinations with ≥500 procedures remaining at risk

1  
2  
3  
4  
5  
6  
7  
8  
9  
10  
11  
12  
13  
14  
15  
16  
17  
18  
19  
20  
21  
22  
23  
24  
25  
26  
27  
28  
29  
30  
31  
32  
33  
34  
35  
36  
37  
38  
39  
40  
41  
42  
43  
44  
45  
46

All stem-cup combinations by bearing type at 7 years in Men >75 years

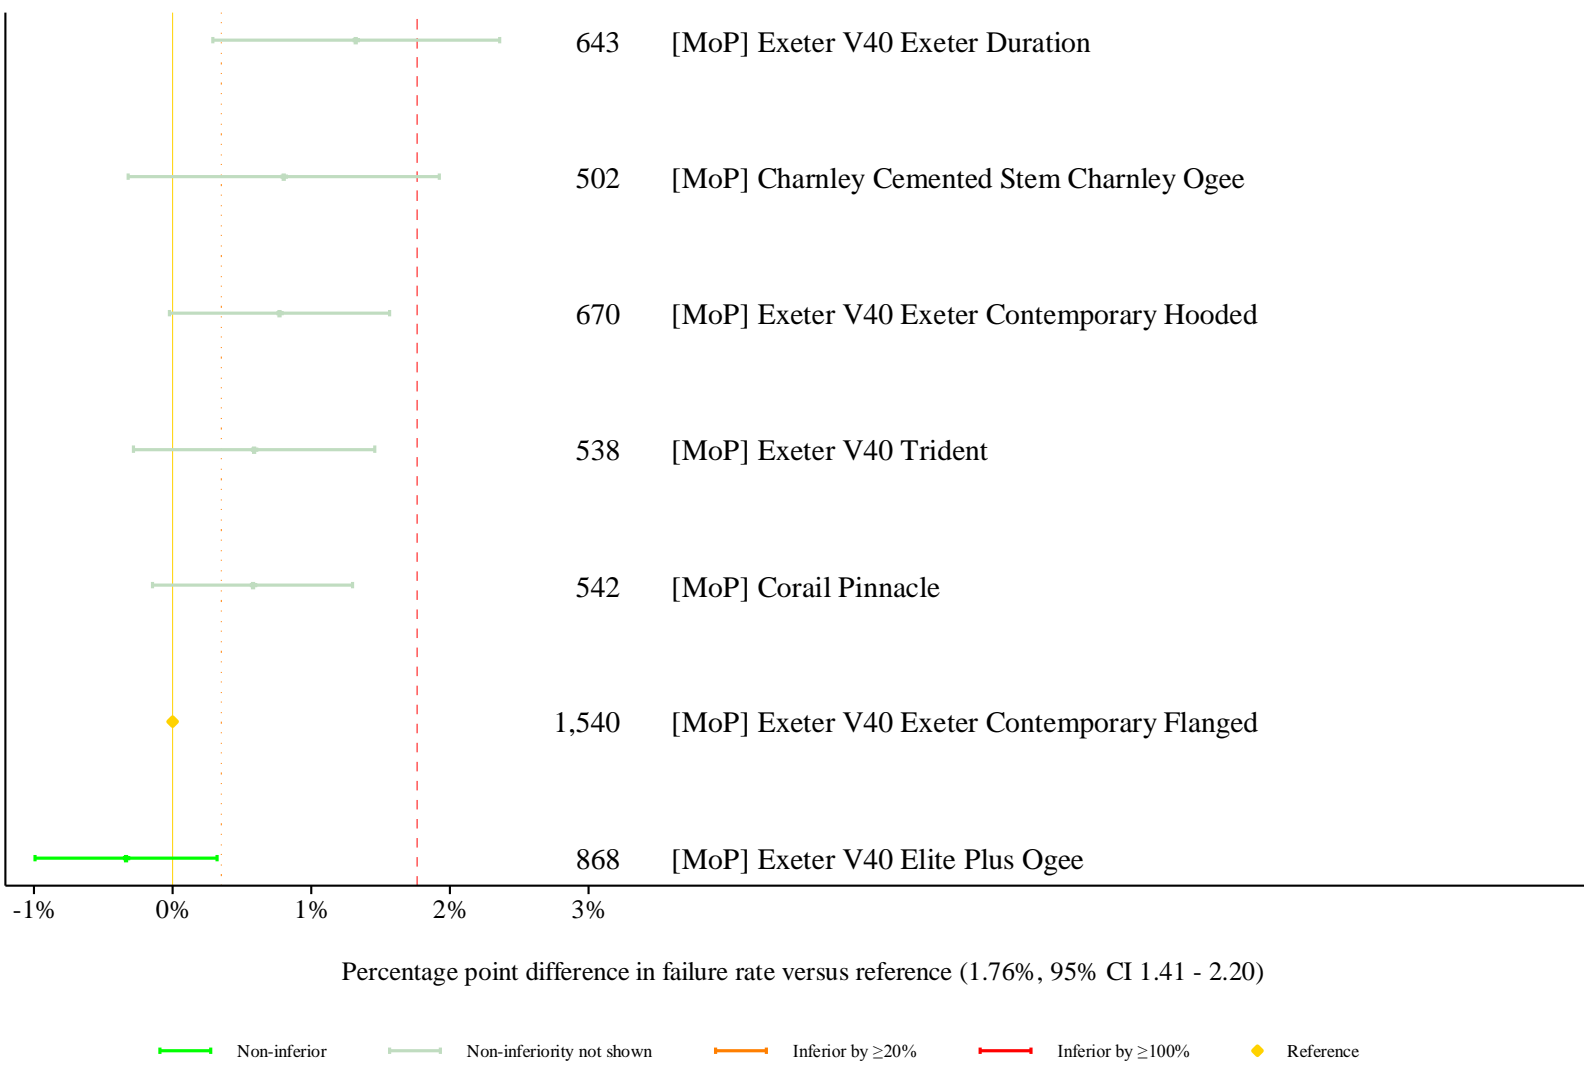

Supplementary Figure 5a: Difference in failure of implanted constructs compared to a contemporary reference at 10 years, using all stem-cup combinations with  $\geq 500$  procedures remaining at risk

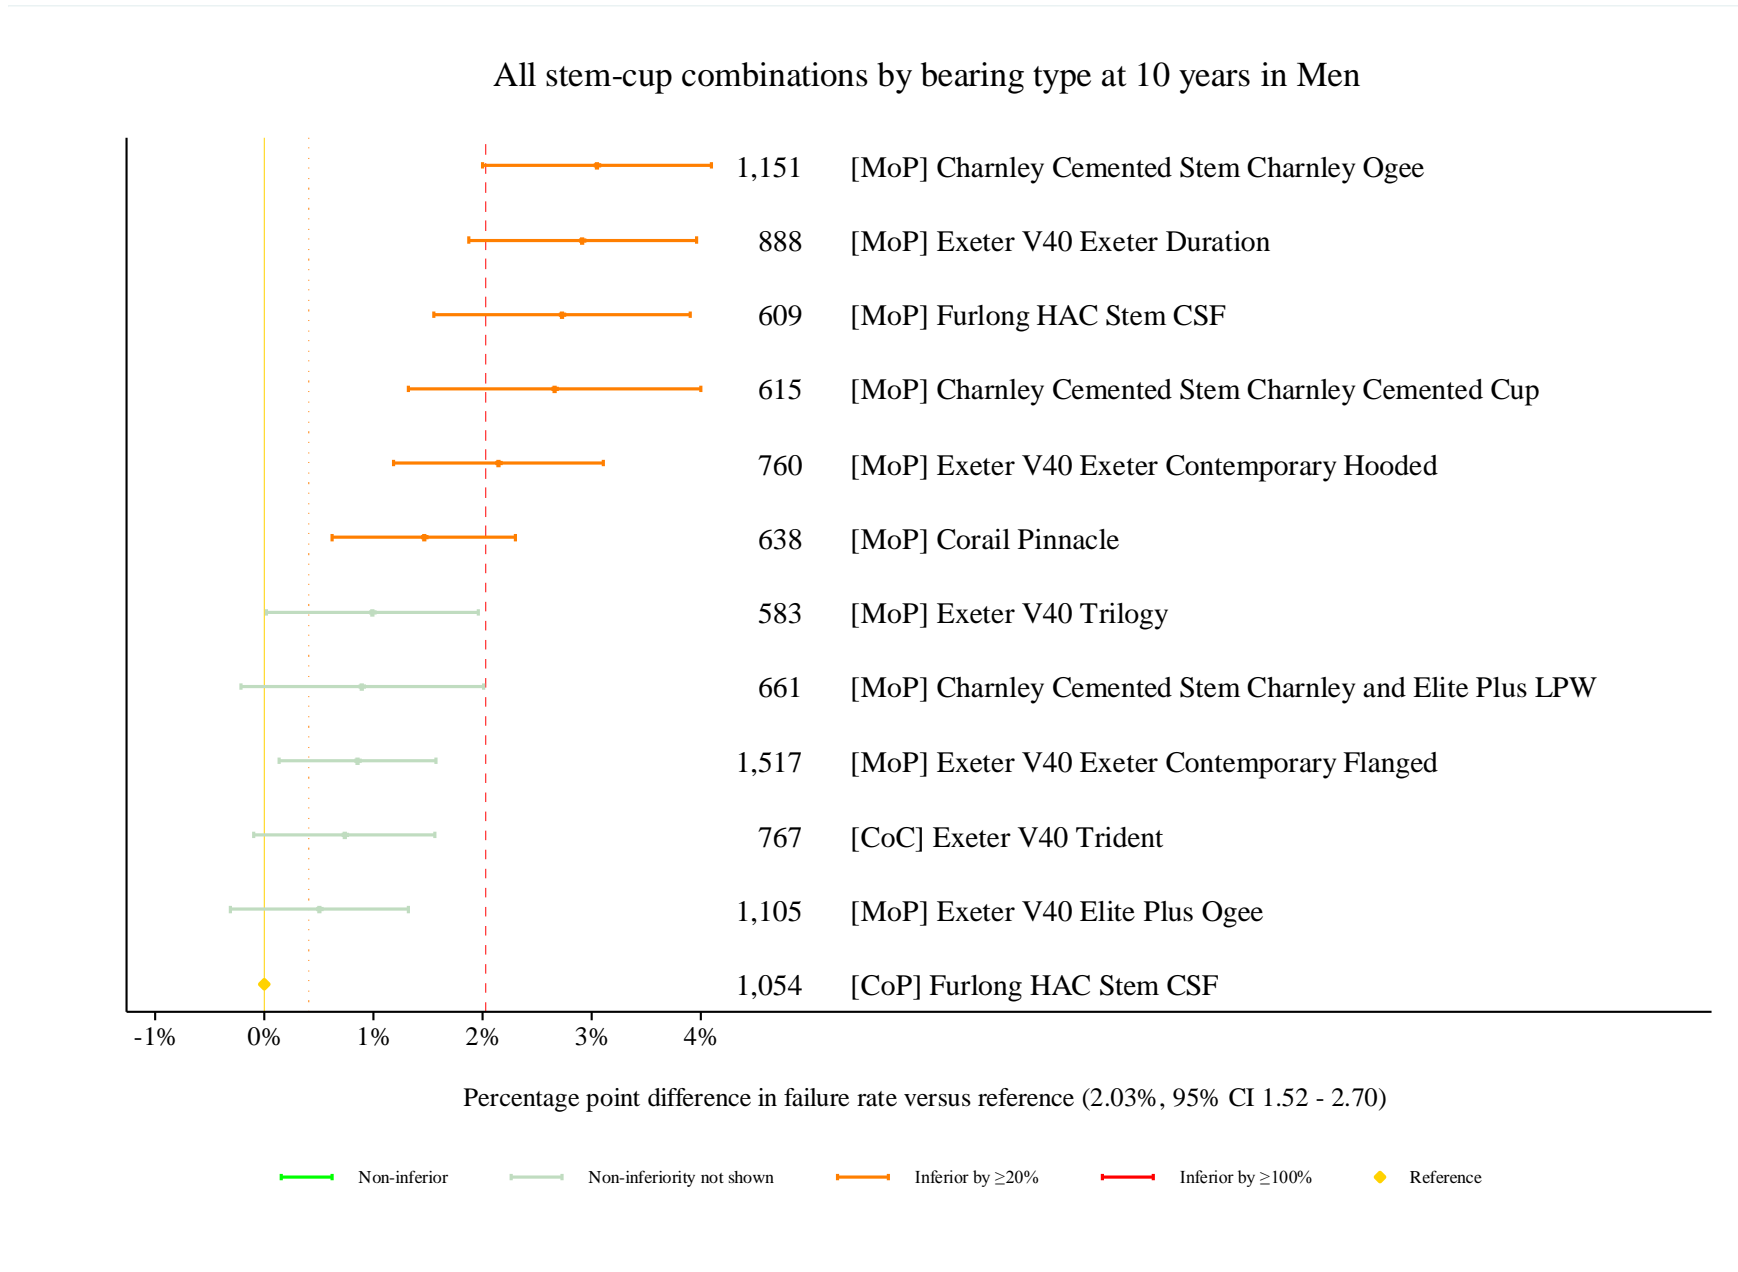

Supplementary Figure 5b: Difference in failure of implanted constructs compared to a contemporary reference at 10 years in men between 55 and 75 years, using all stem-cup combinations with ≥500 procedures remaining at risk

1  
2  
3  
4  
5  
6  
7  
8  
9  
10  
11  
12  
13  
14  
15  
16  
17  
18  
19  
20  
21  
22  
23  
24  
25  
26  
27  
28  
29  
30  
31  
32  
33  
34  
35  
36  
37  
38  
39  
40  
41  
42  
43  
44  
45  
46

All stem-cup combinations by bearing type at 10 years in Men 55-75 years

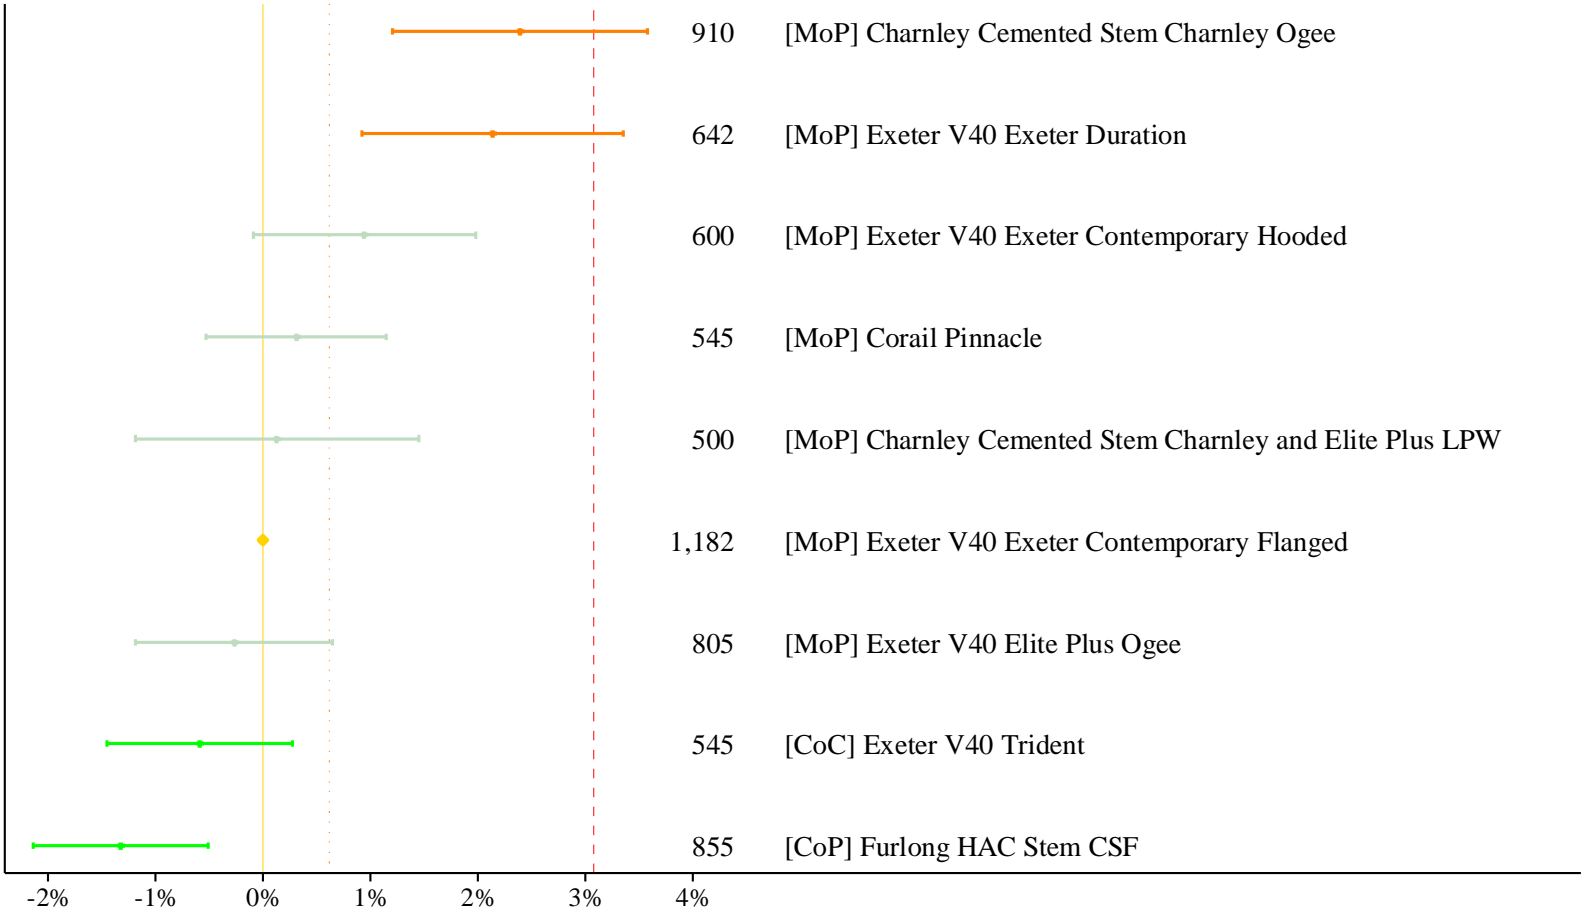

Percentage point difference in failure rate versus reference (3.08%, 95% CI 2.59 - 3.65)

Legend: Non-inferior (green line), Non-inferiority not shown (light green line), Inferior by ≥20% (orange line), Inferior by ≥100% (red line), Reference (yellow diamond)

Supplementary Figure 6a: Difference in failure of implanted constructs compared to a contemporary reference at 3 years in women, using all stem-cup combinations with ≥500 procedures remaining at risk

All stem-cup combinations by bearing type at 3 years in Women

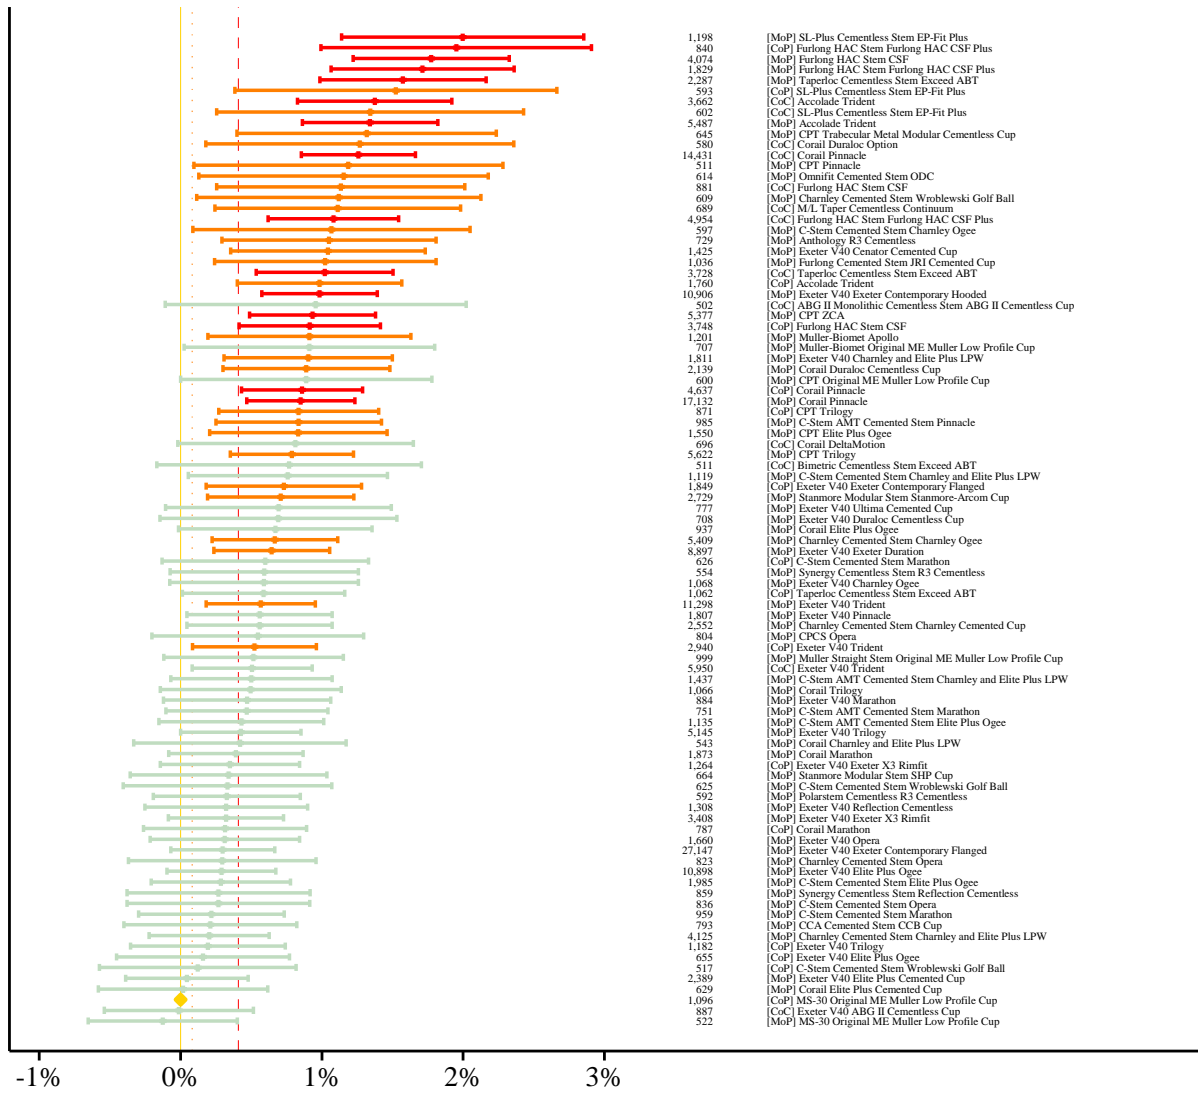

Percentage point difference in failure rate versus reference (0.41%, 95% CI 0.17 - 0.98)

■ Non-inferior    
 ■ Non-inferiority not shown    
 ■ Inferior by ≥20%    
 ■ Inferior by ≥100%    
 ◆ Reference



Supplementary Figure 6b: Difference in failure of implanted constructs compared to a contemporary reference at 3 years in women less than 55 years, using all stem-cup combinations with ≥500 procedures remaining at risk

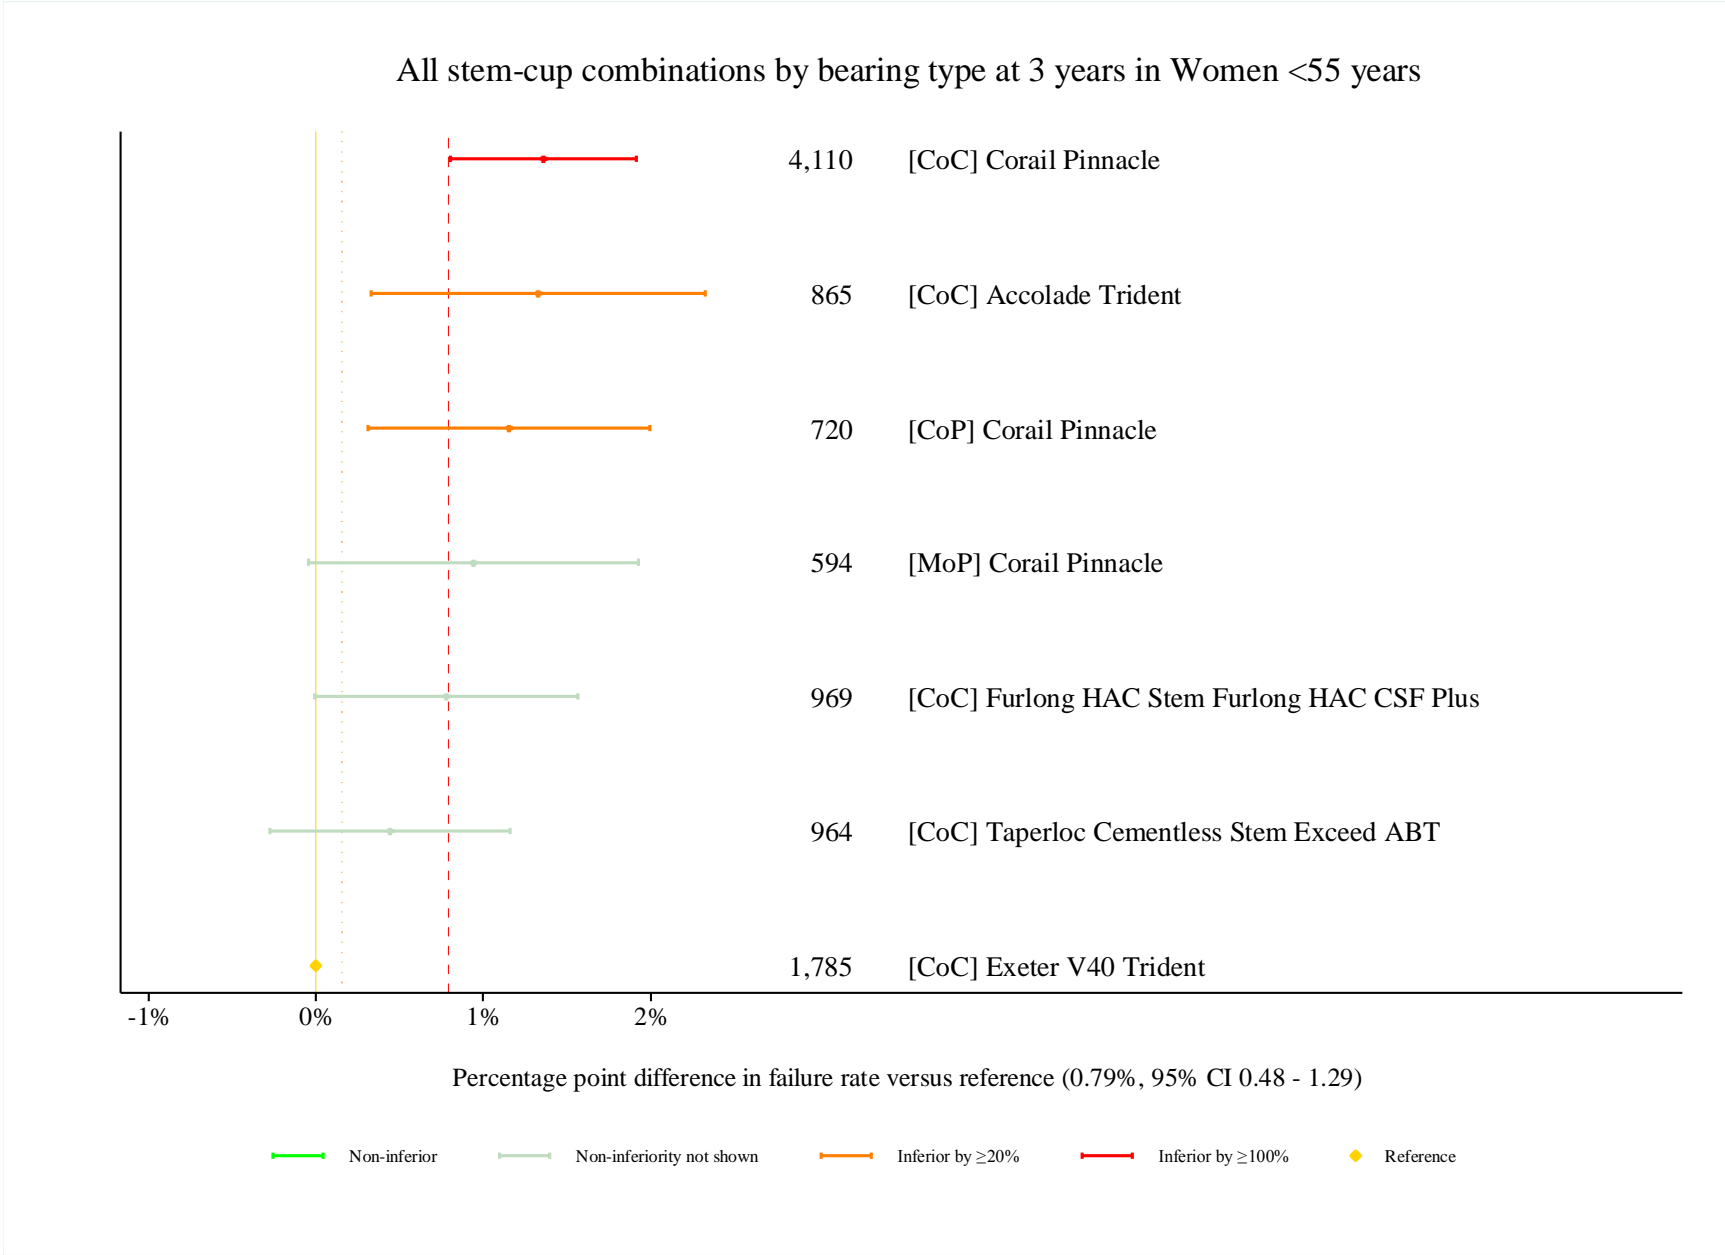

Supplementary Figure 6c: Difference in failure of implanted constructs compared to a contemporary reference at 3 years in women between 55 and 75 years, using all stem-cup combinations with  $\geq 500$  procedures remaining at risk

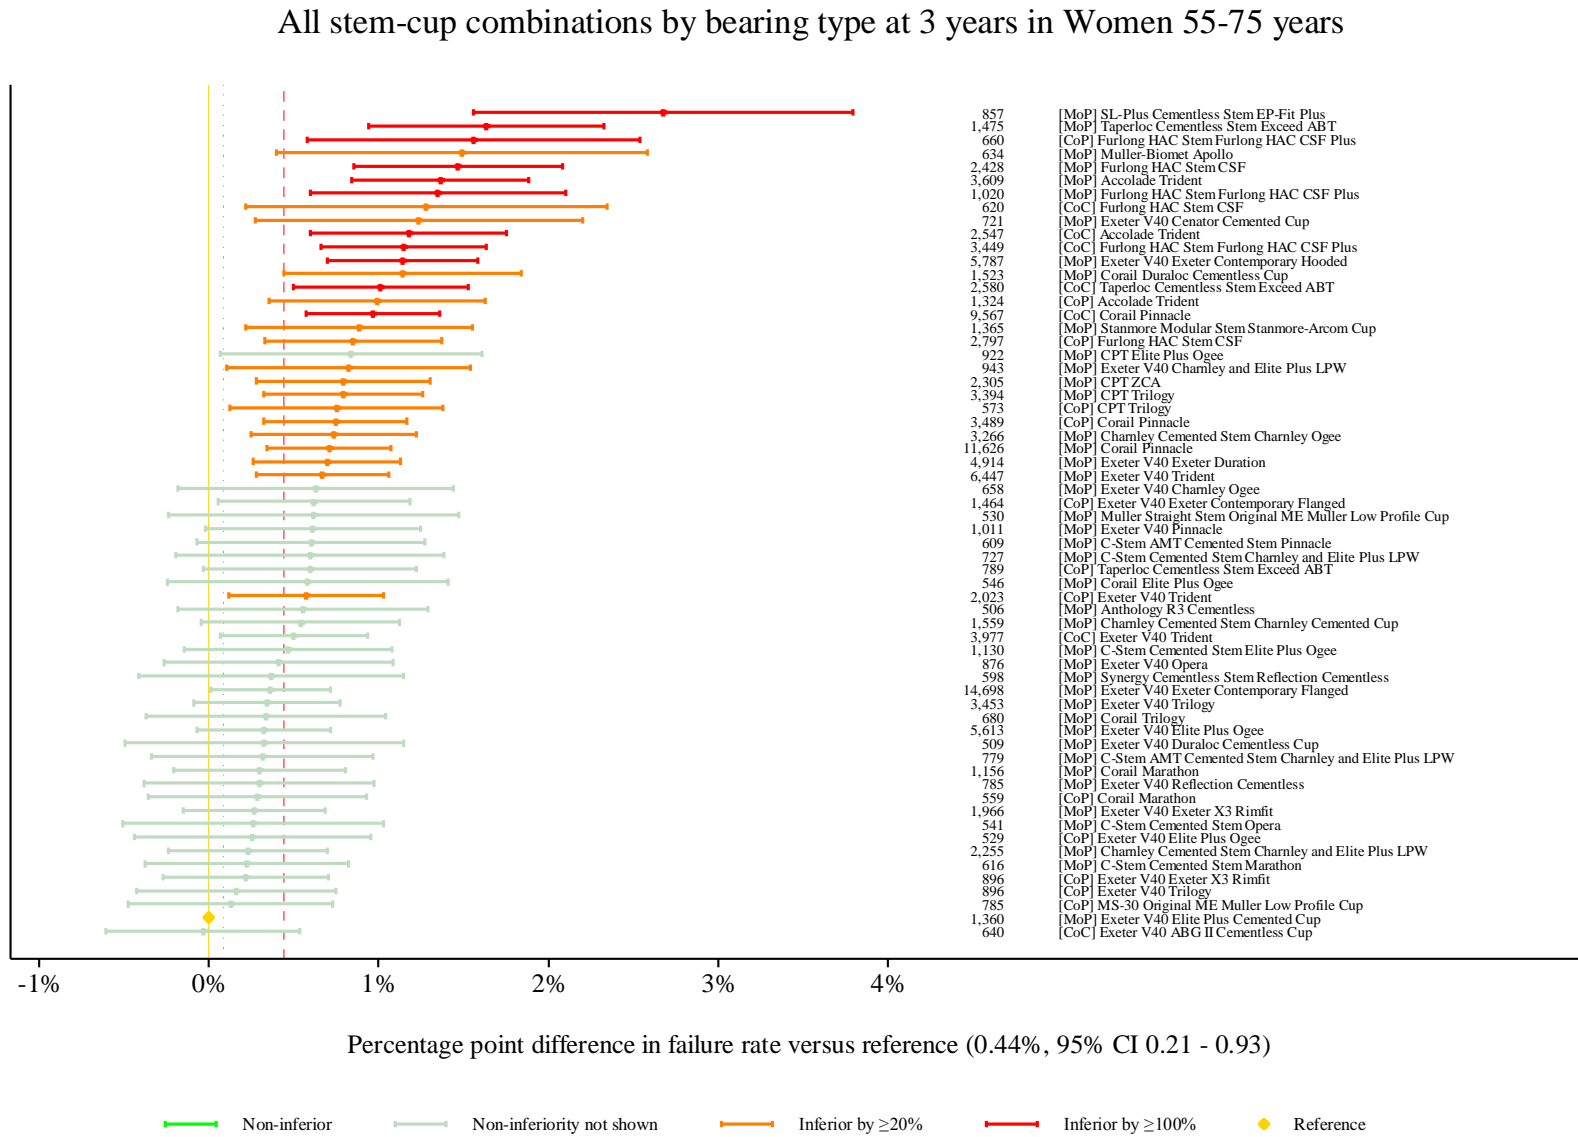

Supplementary Figure 6d: Difference in failure of implanted constructs compared to a contemporary reference at 3 years in women greater than 75 years, using all stem-cup combinations with ≥500 procedures remaining at risk

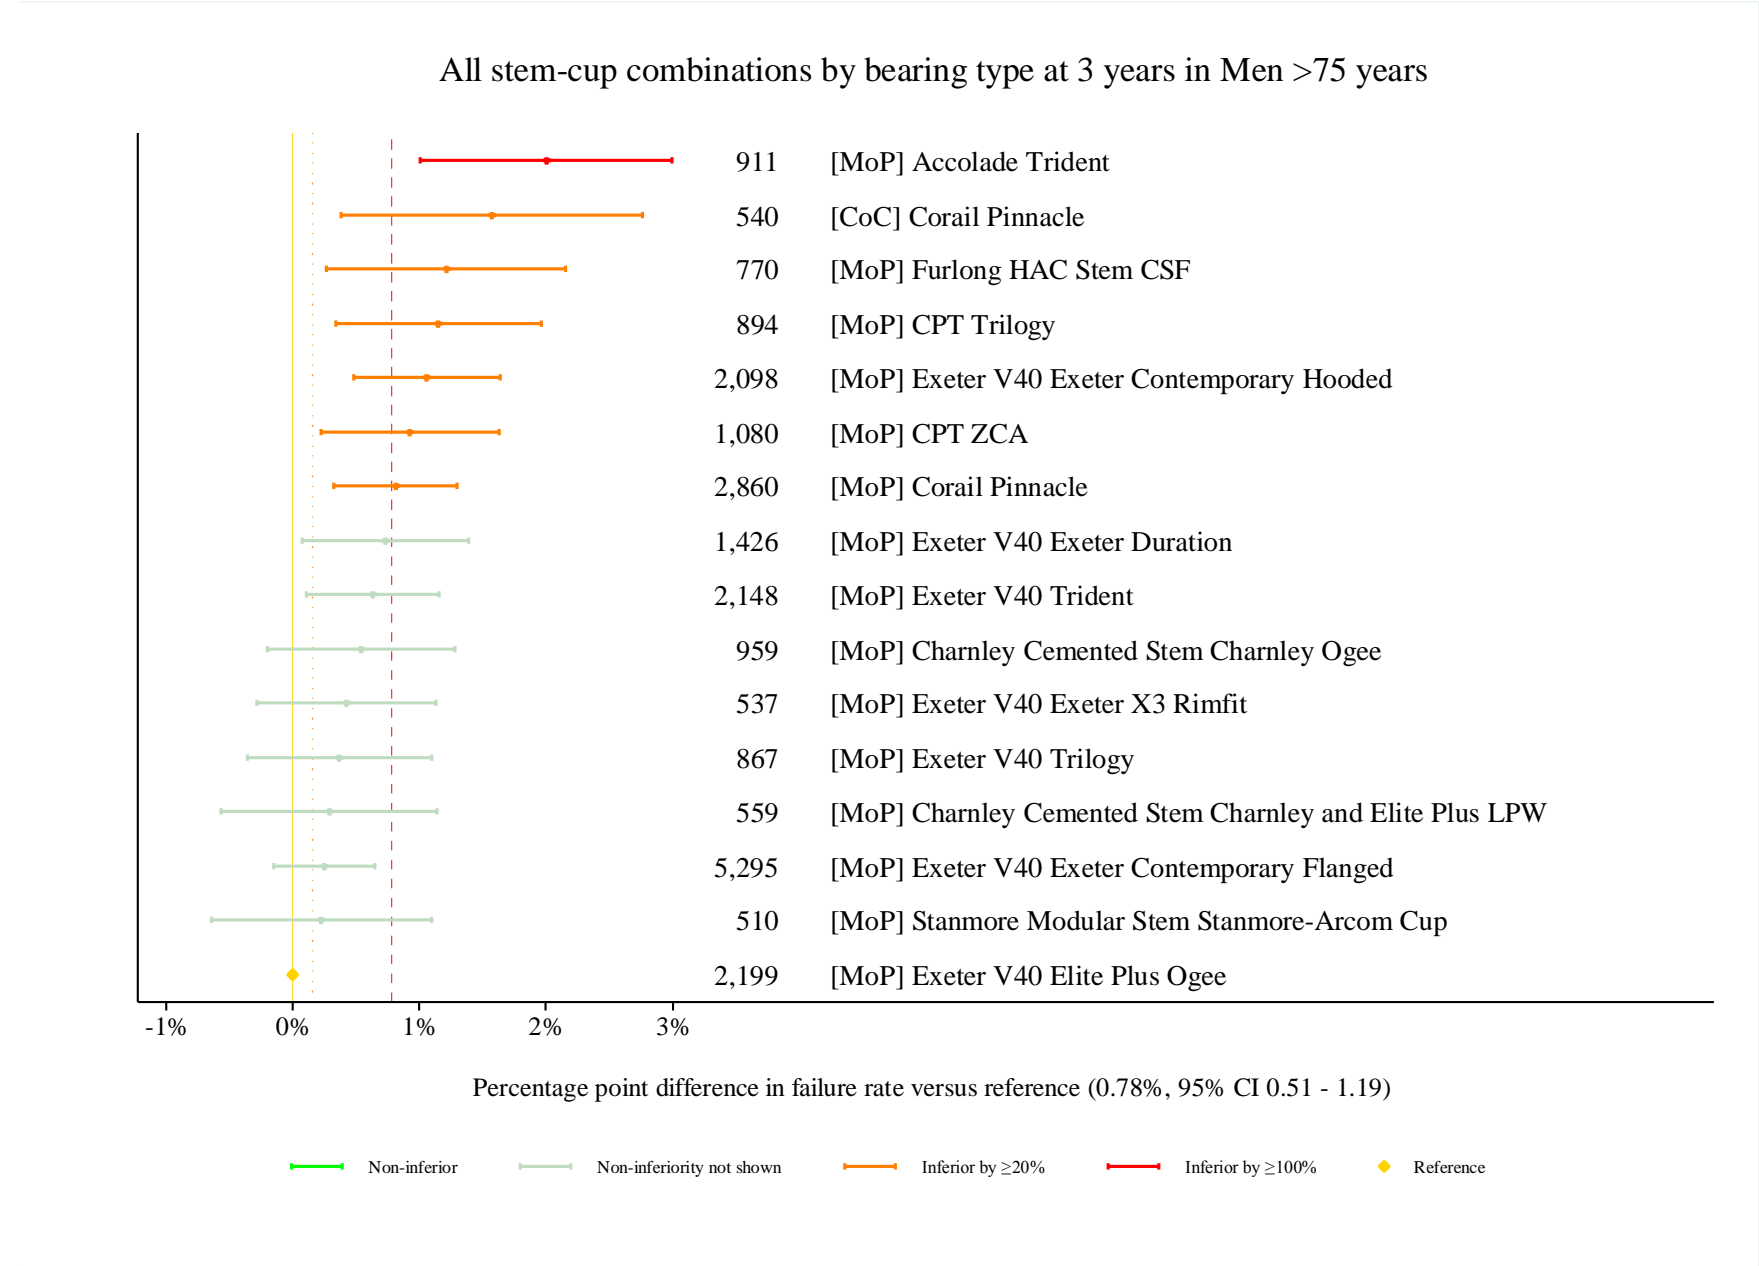

Supplementary Figure 7a: Difference in failure of implanted constructs compared to a contemporary reference at 5 years in women, using all stem-cup combinations with  $\geq 500$  procedures remaining at risk

All stem-cup combinations by bearing type at 5 years in Women

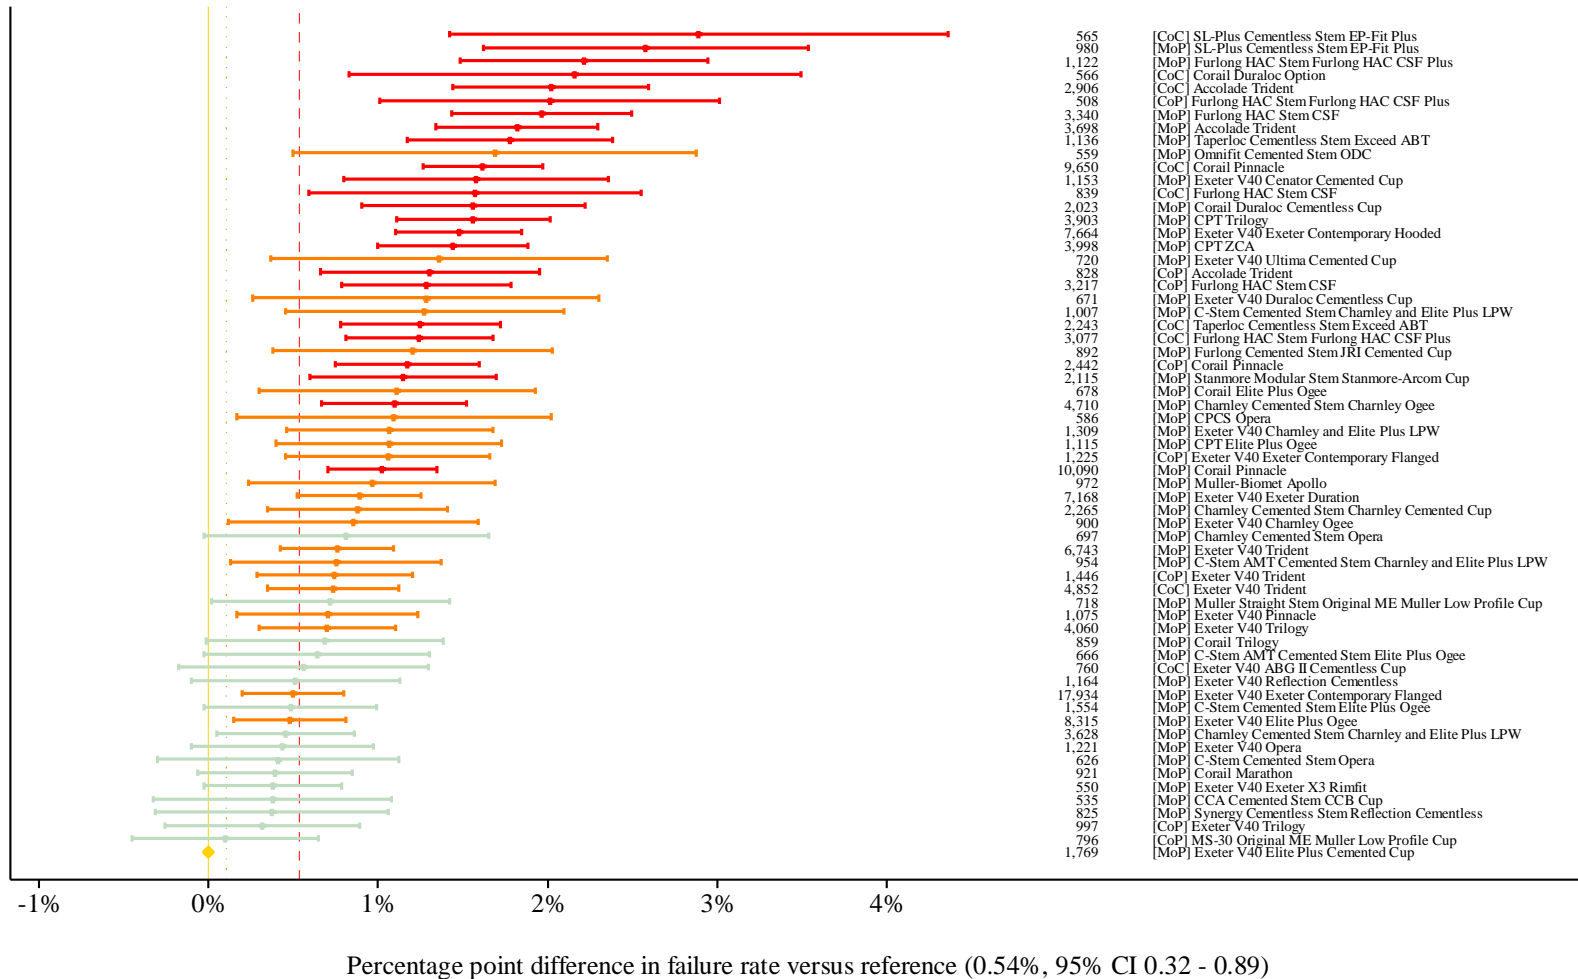

— Non-inferior   
 — Non-inferiority not shown   
 — Inferior by  $\geq 20\%$    
 — Inferior by  $\geq 100\%$    
 ◆ Reference

Supplementary Figure 7b: Difference in failure of implanted constructs compared to a contemporary reference at 5 years in women less than 55 years, using all stem-cup combinations with ≥500 procedures remaining at risk

1  
2  
3  
4  
5  
6  
7  
8  
9  
10  
11  
12  
13  
14  
15  
16  
17  
18  
19  
20  
21  
22  
23  
24  
25  
26  
27  
28  
29  
30  
31  
32  
33  
34  
35  
36  
37  
38  
39  
40  
41  
42  
43  
44  
45  
46

All stem-cup combinations by bearing type at 5 years in Women <55 years

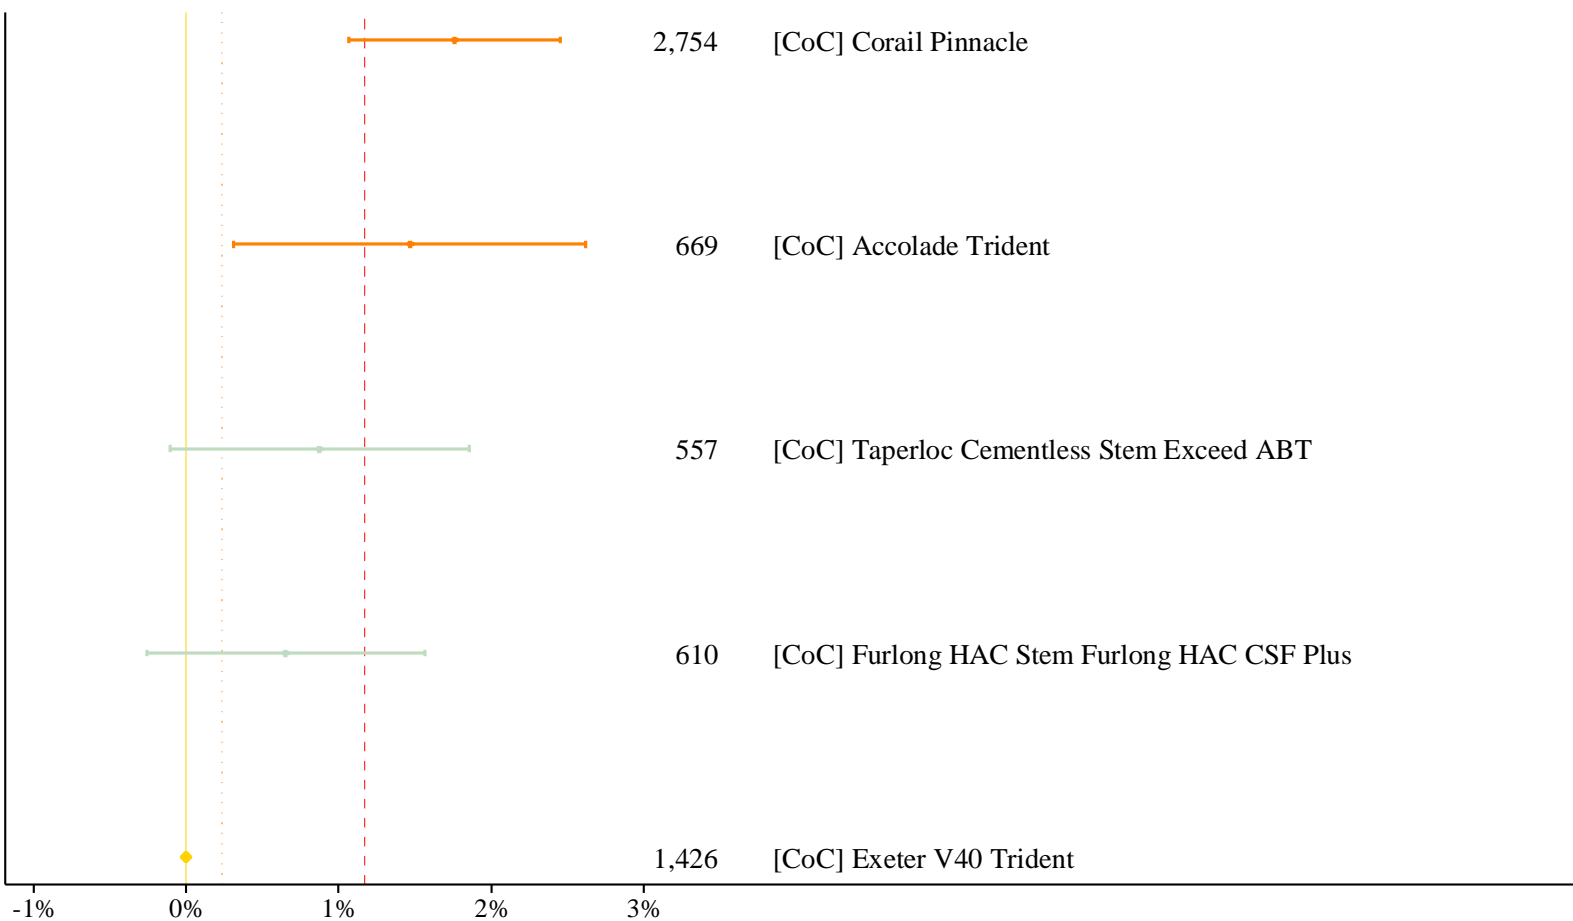

Percentage point difference in failure rate versus reference (1.17%, 95% CI 0.77 - 1.78)

Legend: Non-inferior (green line), Non-inferiority not shown (grey line), Inferior by ≥20% (orange line), Inferior by ≥100% (red line), Reference (yellow diamond)

Supplementary Figure 7c: Difference in failure of implanted constructs compared to a contemporary reference at 5 years in women between 55 and 75 years, using all stem-cup combinations with  $\geq 500$  procedures remaining at risk

All stem-cup combinations by bearing type at 5 years in Women 55-75 years

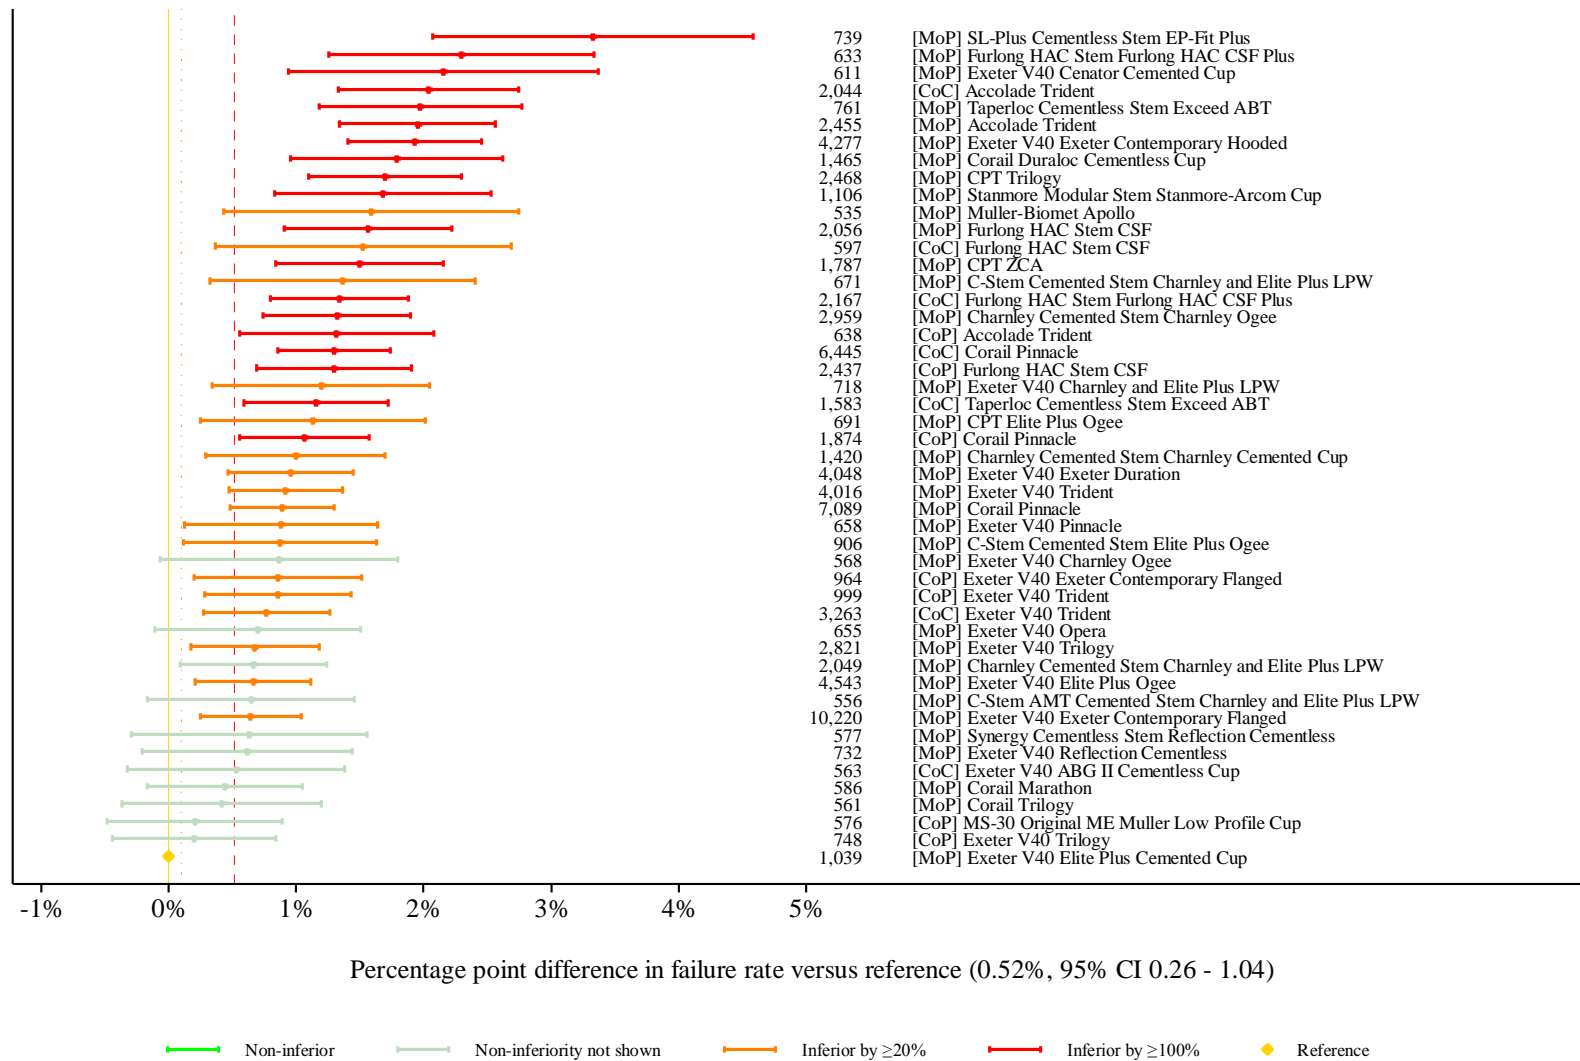

Supplementary Figure 7d: Difference in failure of implanted constructs compared to a contemporary reference at 5 years in women greater than 75 years, using all stem-cup combinations with ≥500 procedures remaining at risk

All stem-cup combinations by bearing type at 5 years in Women >75 years

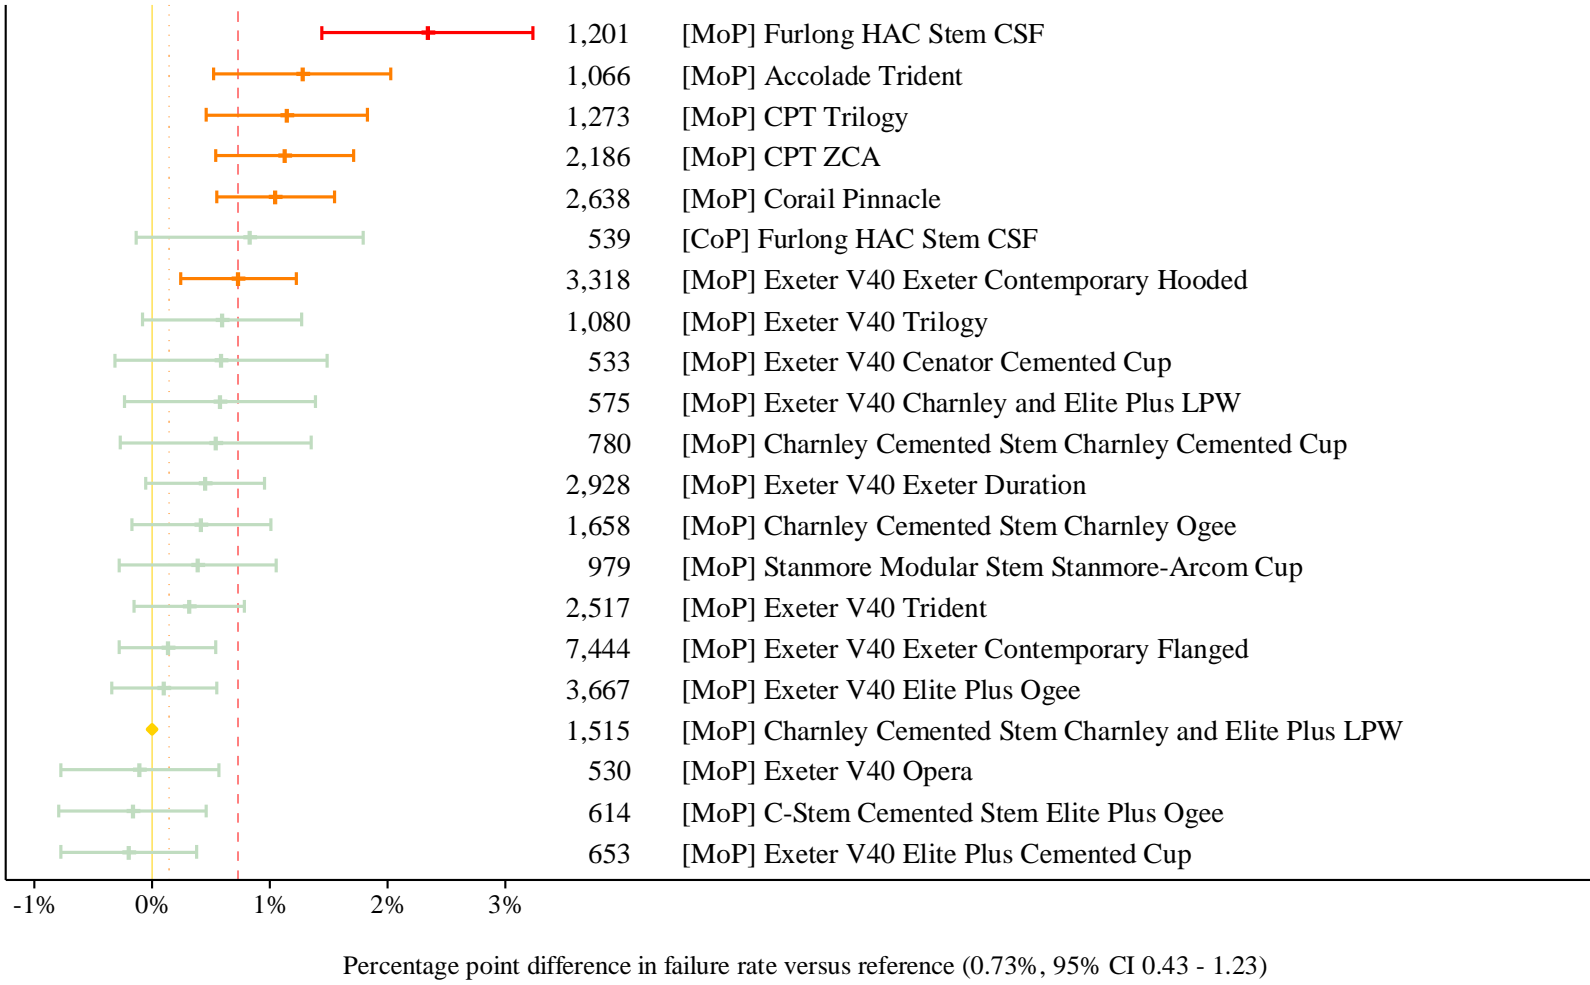

Legend: Non-inferior (green), Non-inferiority not shown (light green), Inferior by ≥20% (orange), Inferior by ≥100% (red), Reference (yellow diamond)

Supplementary Figure 8a: Difference in failure of implanted constructs compared to a contemporary reference at 7 years in women, using all stem-cup combinations with  $\geq 500$  procedures remaining at risk

All stem-cup combinations by bearing type at 7 years in Women

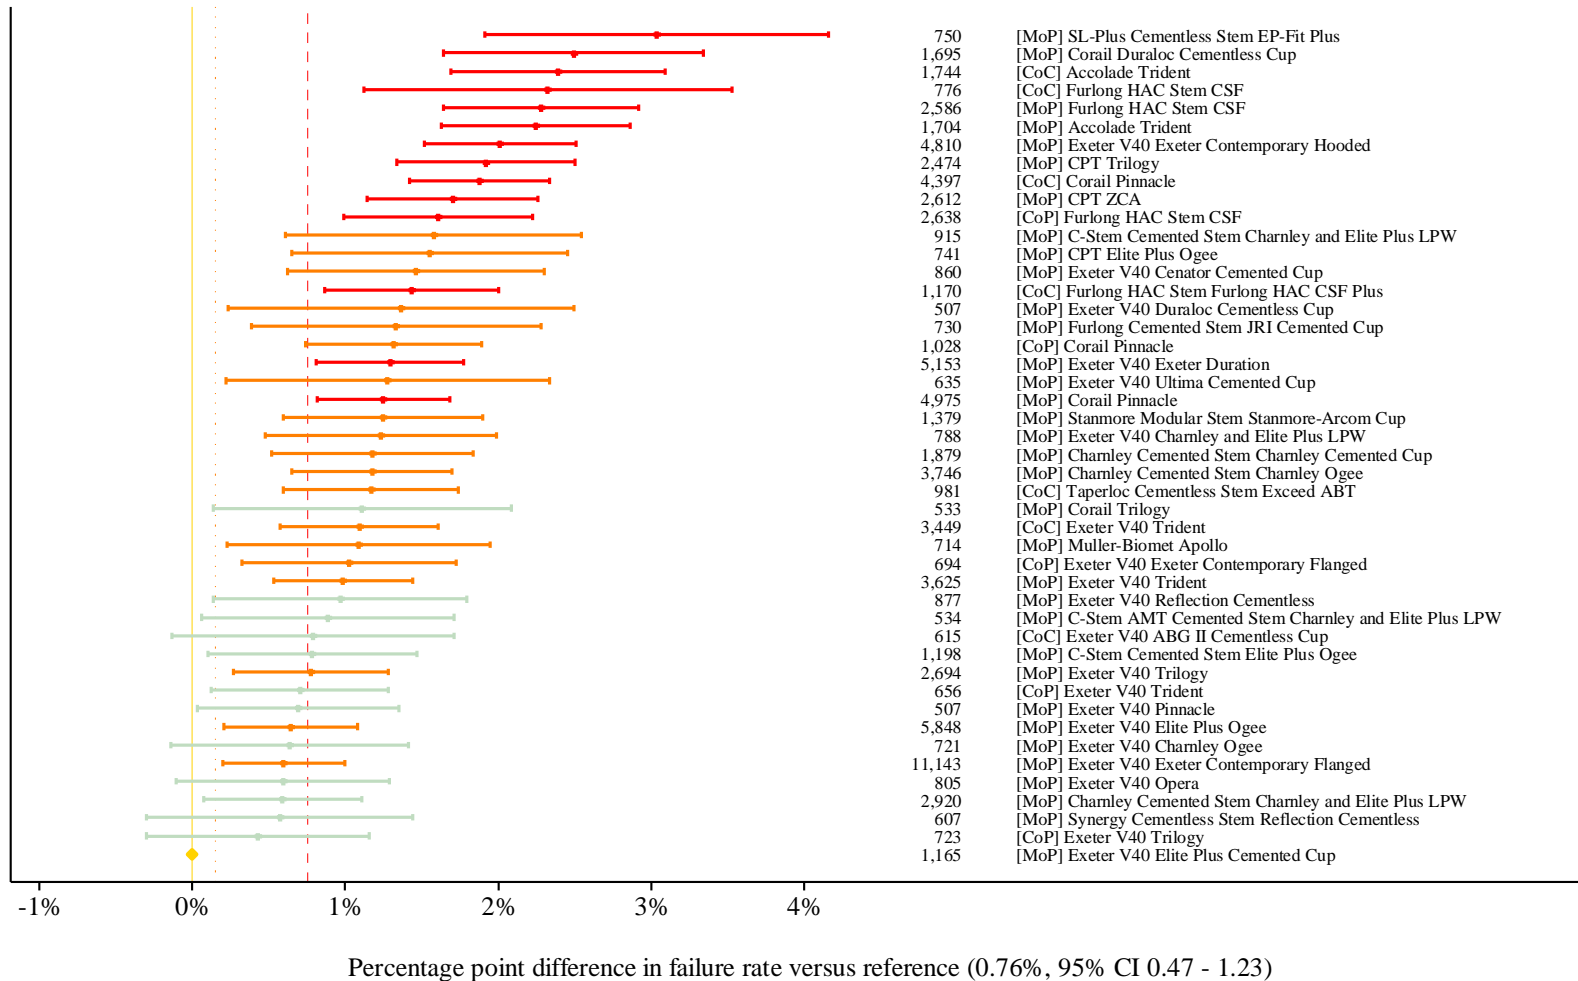



Supplementary Figure 8b: Difference in failure of implanted constructs compared to a contemporary reference at 7 years in women less than 55 years, using all stem-cup combinations with ≥500 procedures remaining at risk

1  
2  
3  
4  
5  
6  
7  
8  
9  
10  
11  
12  
13  
14  
15  
16  
17  
18  
19  
20  
21  
22  
23  
24  
25  
26  
27  
28  
29  
30  
31  
32  
33  
34  
35  
36  
37  
38  
39  
40  
41  
42  
43  
44  
45  
46

All stem-cup combinations by bearing type at 7 years in Women <55 years

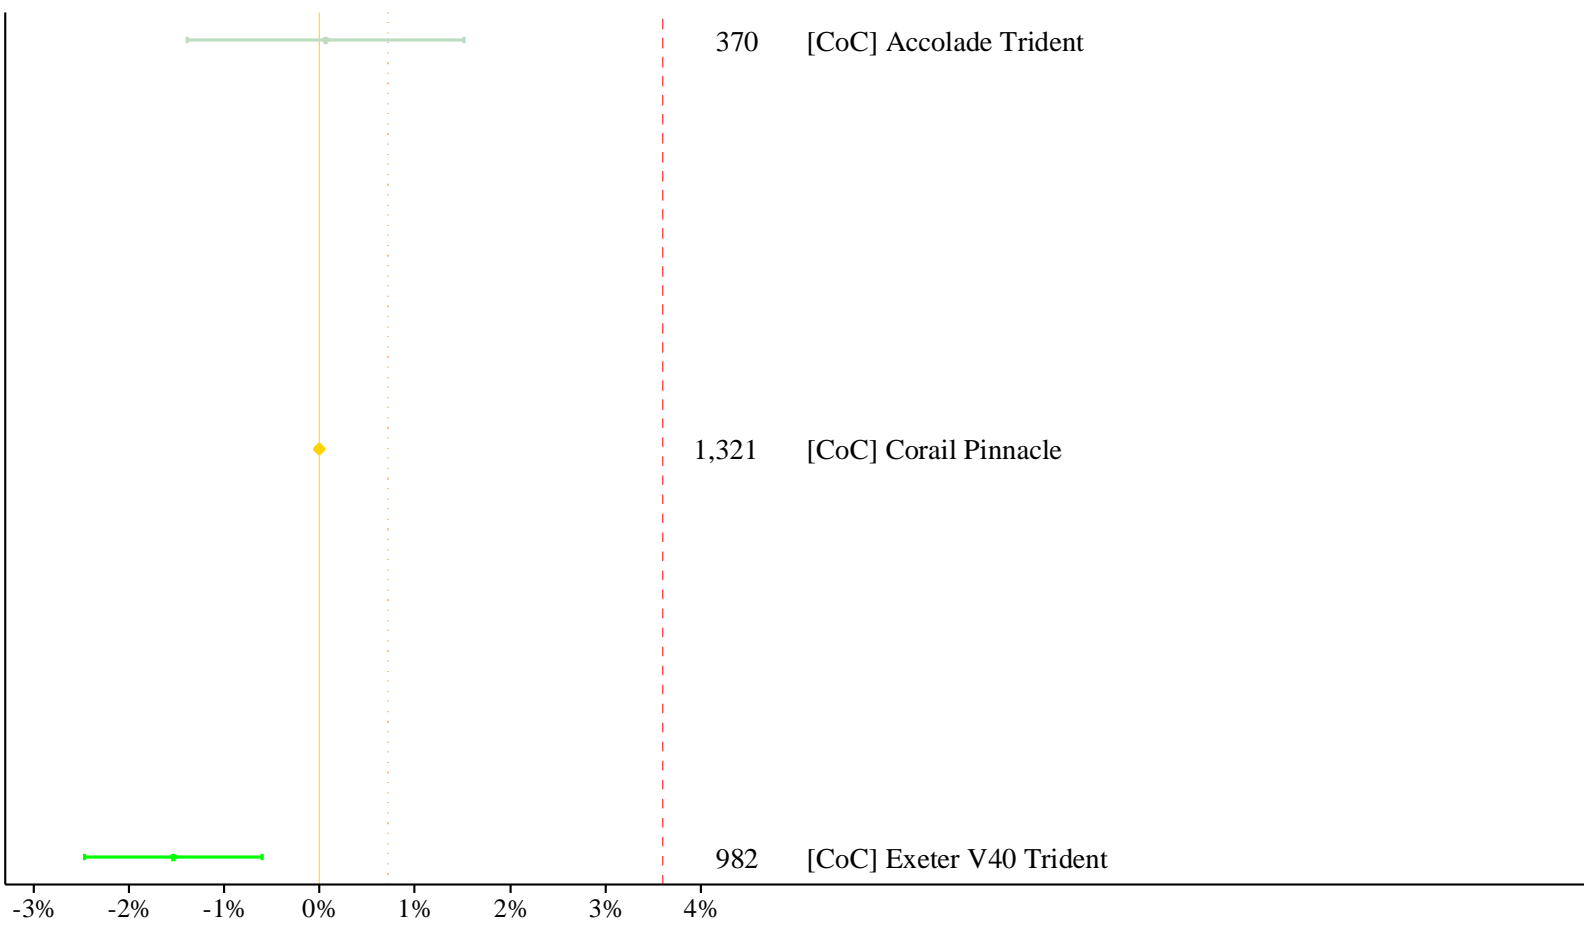

Percentage point difference in failure rate versus reference (3.60%, 95% CI 3.05 - 4.24)

— Non-inferior    
 — Non-inferiority not shown    
 — Inferior by ≥20%    
 — Inferior by ≥100%    
 ◆ Reference

Supplementary Figure 8c: Difference in failure of implanted constructs compared to a contemporary reference at 7 years in women between 55 and 75 years, using all stem-cup combinations with ≥500 procedures remaining at risk

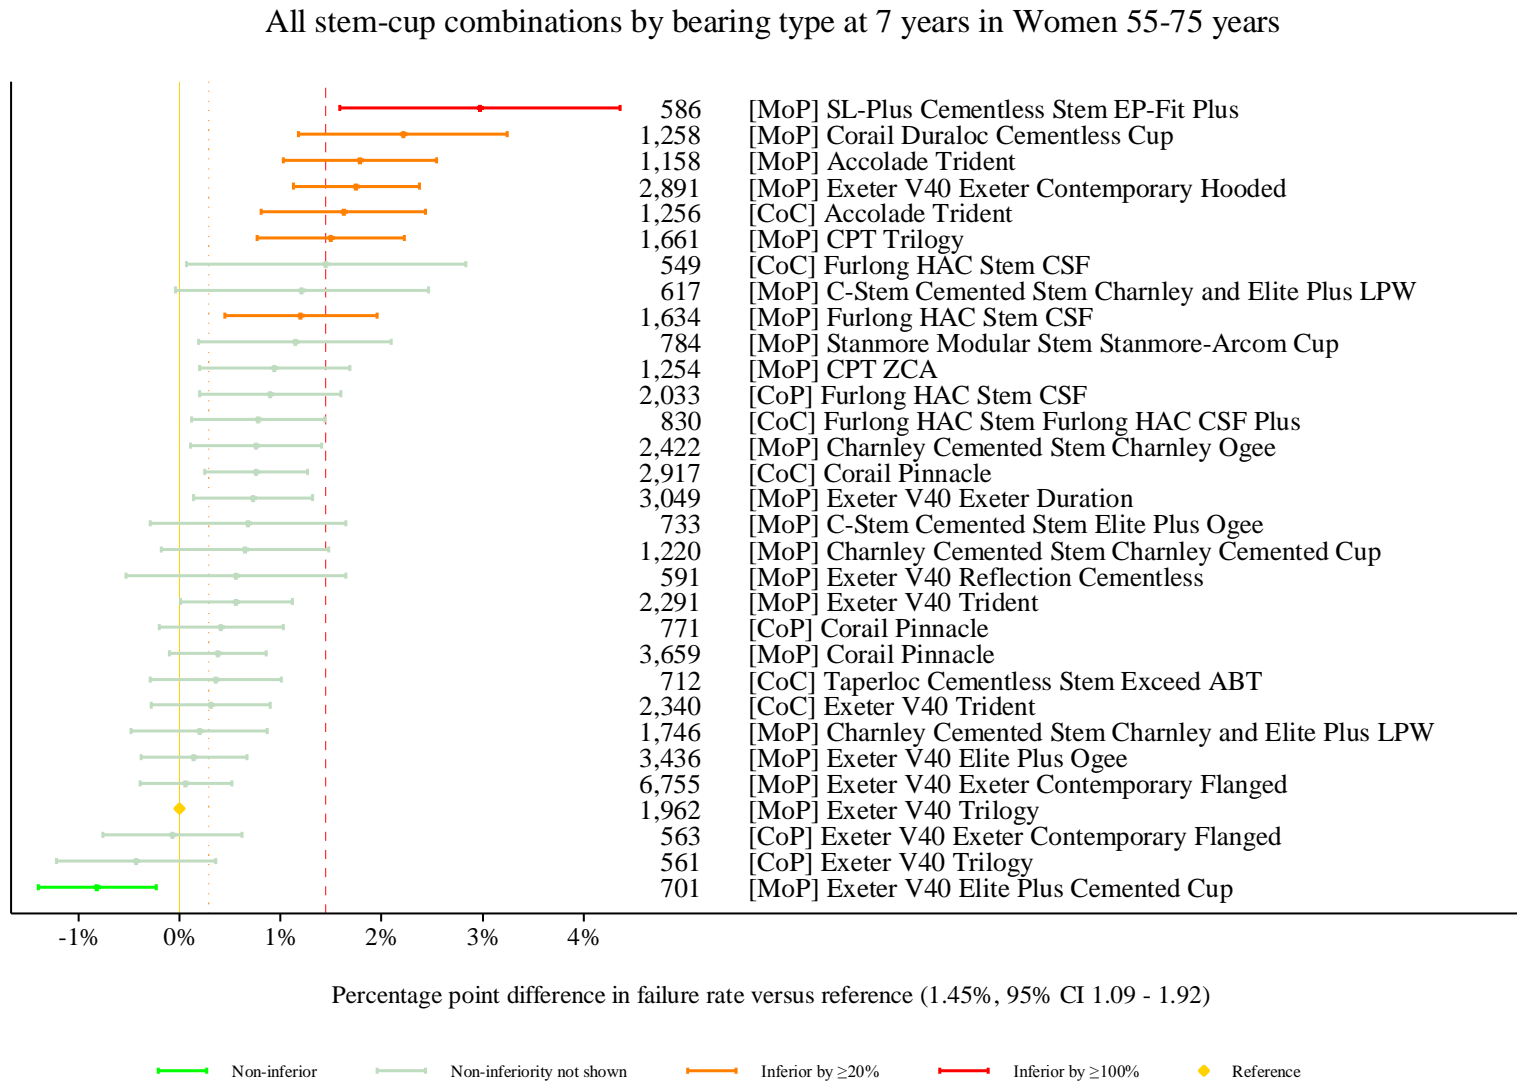

Supplementary Figure 8d: Difference in failure of implanted constructs compared to a contemporary reference at 7 years in women greater than 75 years, using all stem-cup combinations with ≥500 procedures remaining at risk

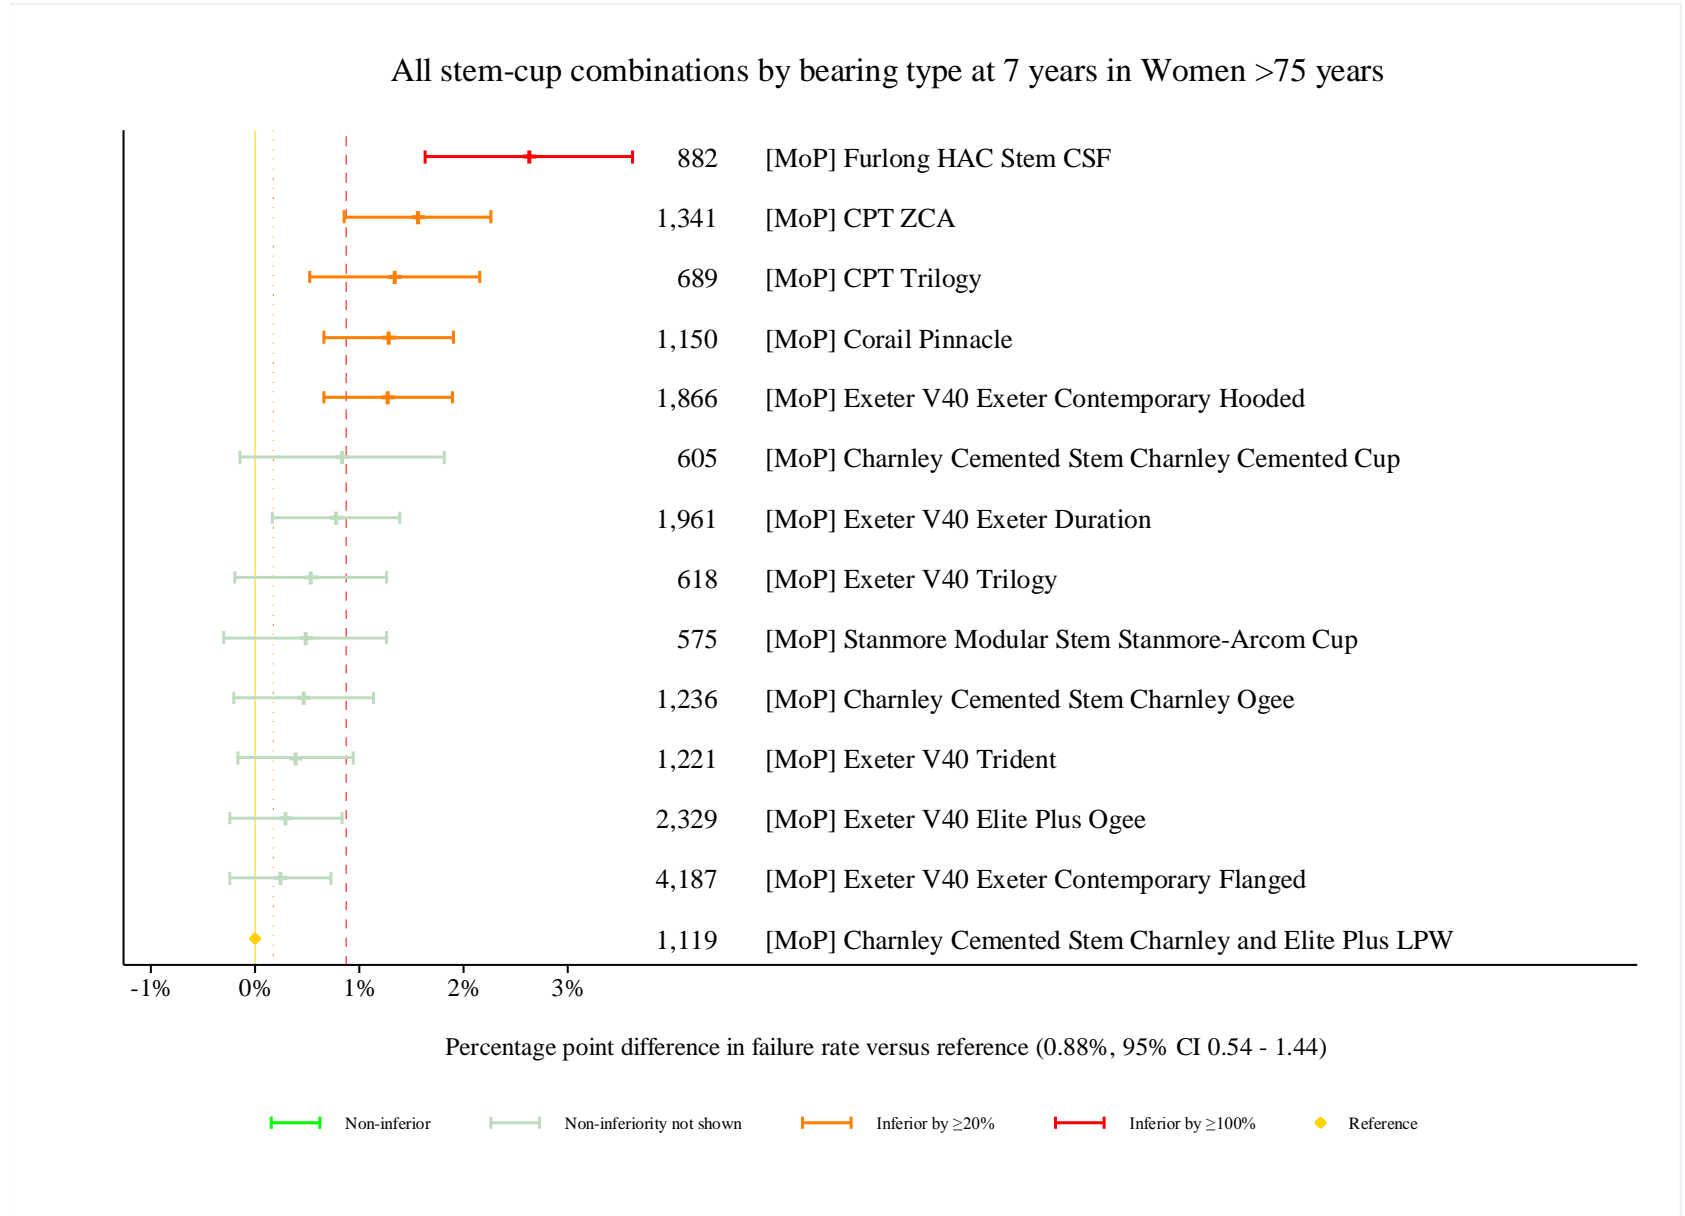

Supplementary Figure 9a: Difference in failure of implanted constructs compared to a contemporary reference at 10 years in women, using all stem-cup combinations with  $\geq 500$  procedures remaining at risk

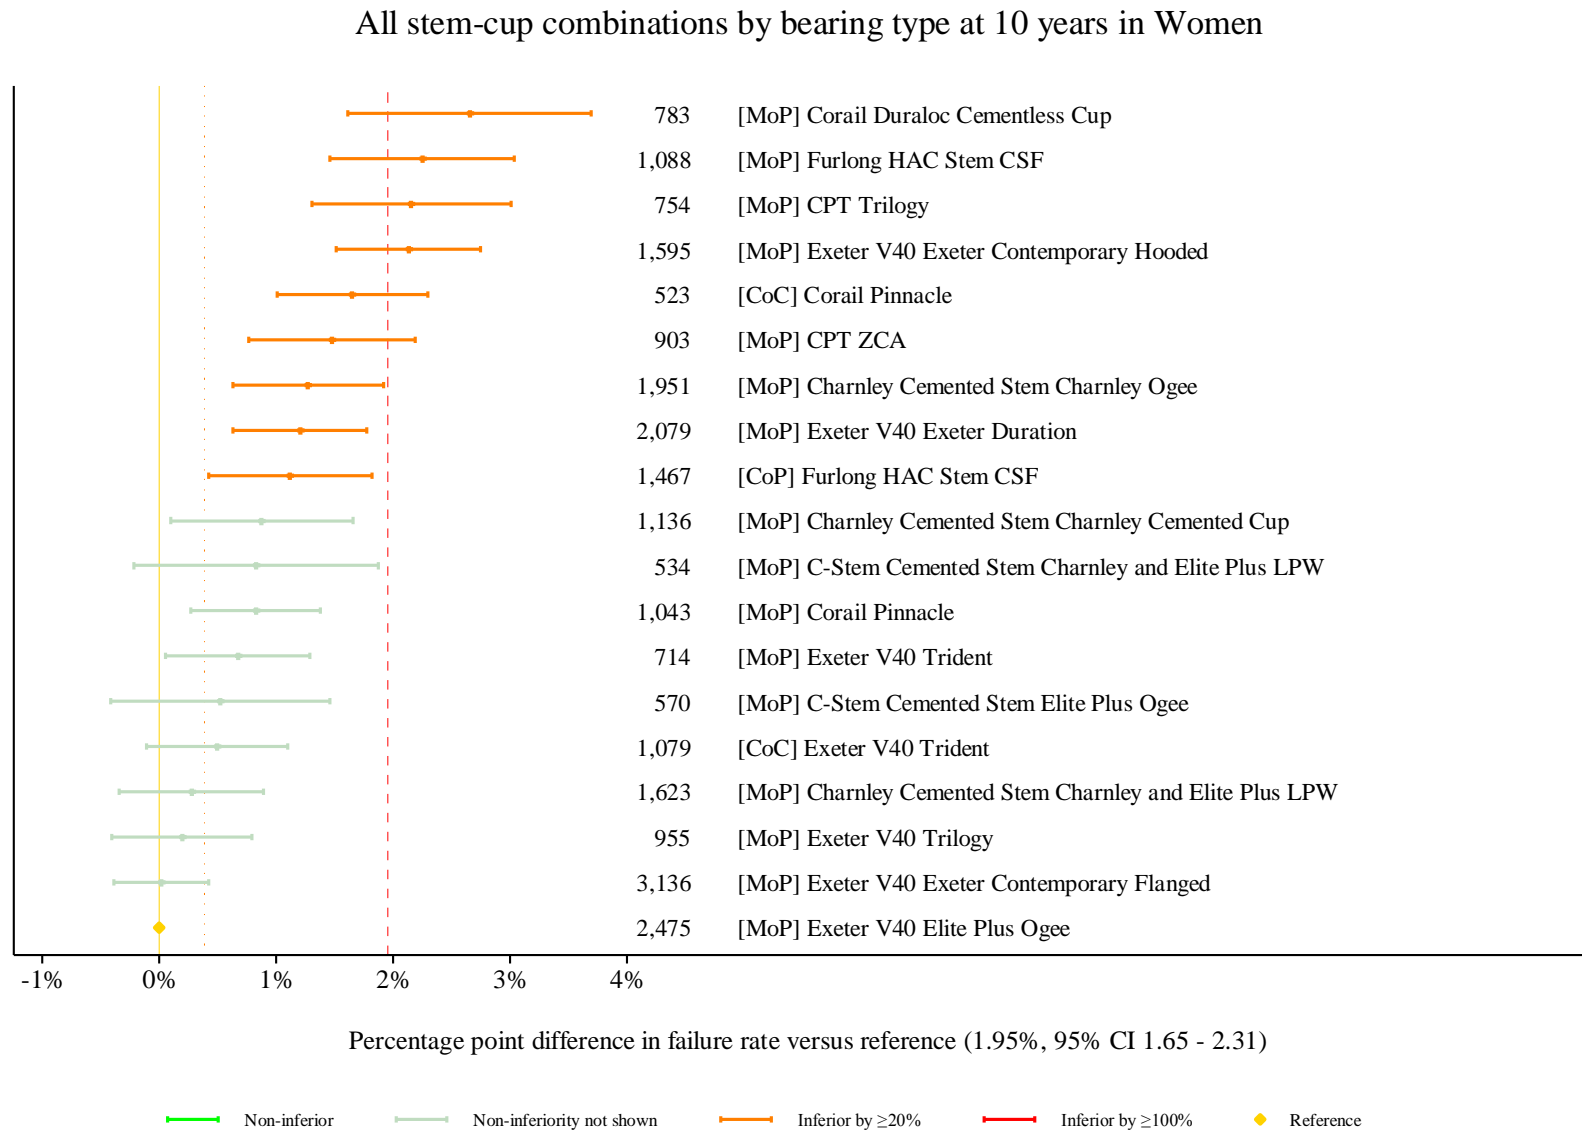

Supplementary Figure 9b: Difference in failure of implanted constructs compared to a contemporary reference at 10 years in women between 55 and 75 years, using all stem-cup combinations with ≥500 procedures remaining at risk

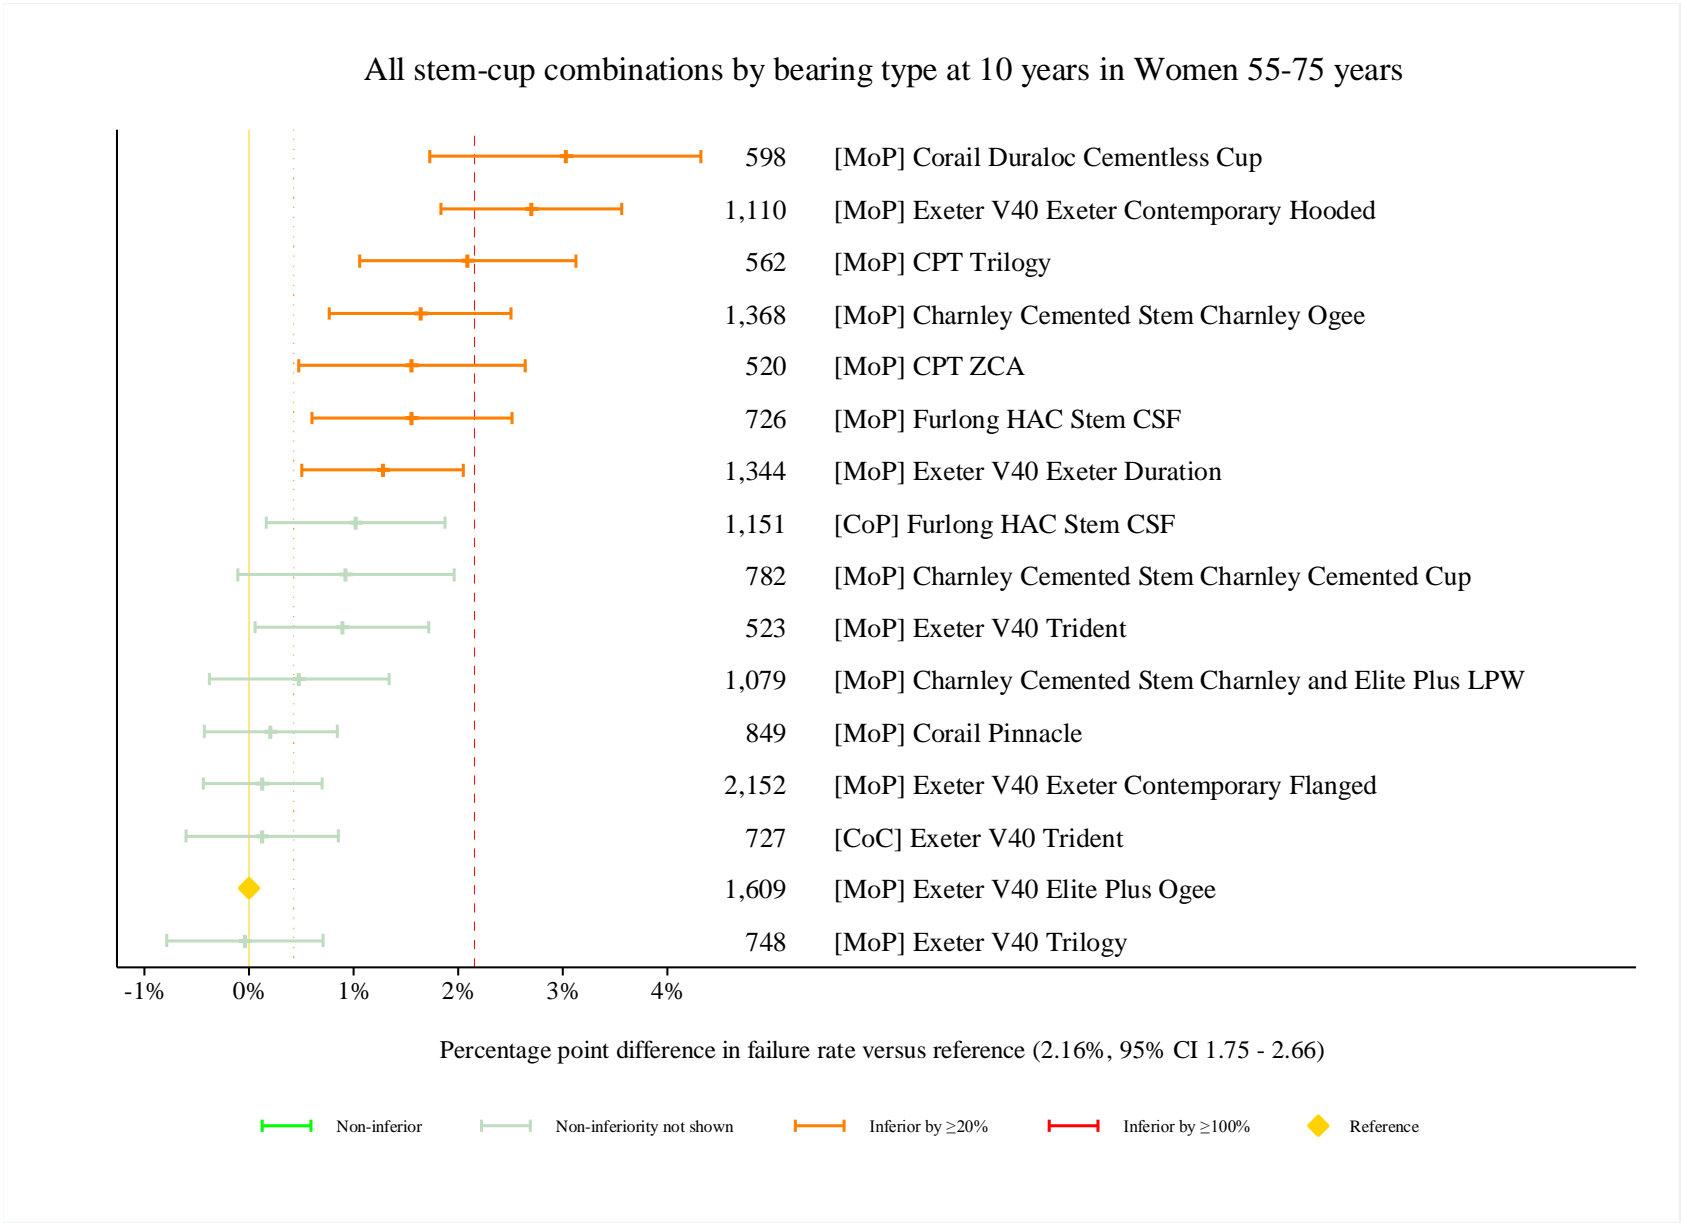

**Supplementary table 1a: Difference in Kaplan-Meier failure estimate between a contemporary reference and implants with at least 250 at risk at 3 years since primary**

| Stem/cup brand                                                | Number at risk | Cumulative failure (%) | Difference in failure (%) | 95% CI         | Equivalence status        | p-value |
|---------------------------------------------------------------|----------------|------------------------|---------------------------|----------------|---------------------------|---------|
| [CoP] MS-30 Original ME Muller Low Profile Cup                | 1,554          | 0.39                   | [REFERENCE]               |                |                           |         |
| [CoC] ABG II Monolithic Cementless Stem ABG II Cementless Cup | 1,061          | 1.82                   | 1.43                      | [ 0.59 , 2.27] | Inferior by $\geq 100\%$  | 0.001   |
| [CoC] ABG II Monolithic Cementless Stem Trident               | 1,007          | 1.98                   | 1.59                      | [ 0.70 , 2.48] | Inferior by $\geq 100\%$  | <0.001  |
| [CoC] AMIStem-H Versafit CC Trio                              | 331            | 2.00                   | 1.61                      | [ 0.44 , 2.77] | Inferior by $\geq 100\%$  | 0.007   |
| [CoC] Accolade Trident                                        | 6,660          | 2.03                   | 1.64                      | [ 1.20 , 2.08] | Inferior by $\geq 100\%$  | <0.001  |
| [CoC] Anthology R3 Cementless                                 | 327            | 1.13                   | 0.74                      | [-0.24 , 1.72] | Non-inferiority not shown | 0.140   |
| [CoC] Bicontact Cementless Stem Plasmacup SC                  | 346            | 1.01                   | 0.62                      | [-0.41 , 1.65] | Non-inferiority not shown | 0.237   |
| [CoC] Bimetric Cementless Stem Exceed ABT                     | 888            | 1.05                   | 0.65                      | [-0.03 , 1.34] | Non-inferiority not shown | 0.059   |
| [CoC] C-Stem AMT Cemented Stem Pinnacle                       | 770            | 0.83                   | 0.44                      | [-0.18 , 1.06] | Non-inferiority not shown | 0.168   |
| [CoC] C-Stem Cemented Stem Pinnacle                           | 342            | 0.54                   | 0.15                      | [-0.65 , 0.95] | Non-inferiority not shown | 0.715   |
| [CoC] CPT Continuum                                           | 801            | 1.71                   | 1.32                      | [ 0.52 , 2.13] | Inferior by $\geq 100\%$  | 0.001   |
| [CoC] CPT Trilogy AB                                          | 525            | 1.12                   | 0.73                      | [-0.21 , 1.67] | Non-inferiority not shown | 0.127   |
| [CoC] CPT Trilogy IT                                          | 314            | 1.14                   | 0.74                      | [-0.13 , 1.62] | Non-inferiority not shown | 0.095   |
| [CoC] Charnley Modular Trilogy AB                             | 252            | 0.39                   | 0.00                      | [-0.82 , 0.81] | Non-inferiority not shown | 0.996   |
| [CoC] Corail Delta TT                                         | 726            | 2.10                   | 1.71                      | [ 0.82 , 2.60] | Inferior by $\geq 100\%$  | <0.001  |
| [CoC] Corail DeltaMotion                                      | 1,147          | 1.40                   | 1.01                      | [ 0.32 , 1.70] | Inferior by $\geq 20\%$   | 0.004   |
| [CoC] Corail Duraloc Option                                   | 1,042          | 1.95                   | 1.56                      | [ 0.68 , 2.43] | Inferior by $\geq 100\%$  | <0.001  |
| [CoC] Corail Pinnacle                                         | 27,047         | 1.79                   | 1.40                      | [ 1.07 , 1.72] | Inferior by $\geq 100\%$  | <0.001  |
| [CoC] Corail Pinnacle Gription                                | 452            | 2.41                   | 2.02                      | [ 0.97 , 3.07] | Inferior by $\geq 100\%$  | <0.001  |
| [CoC] Corail Trinity                                          | 431            | 0.65                   | 0.26                      | [-0.38 , 0.89] | Non-inferiority not shown | 0.430   |
| [CoC] Excia Cementless Plasmacup SC                           | 888            | 1.20                   | 0.81                      | [ 0.12 , 1.50] | Inferior by $\geq 20\%$   | 0.022   |
| [CoC] Exeter V40 ABG II Cementless Cup                        | 1,343          | 0.64                   | 0.25                      | [-0.24 , 0.75] | Non-inferiority not shown | 0.315   |
| [CoC] Exeter V40 Trident                                      | 10,273         | 1.01                   | 0.62                      | [ 0.27 , 0.96] | Inferior by $\geq 20\%$   | <0.001  |
| [CoC] Furlong Evolution Cementless Furlong HAC CSF Plus       | 597            | 1.37                   | 0.98                      | [ 0.36 , 1.60] | Inferior by $\geq 20\%$   | 0.002   |
| [CoC] Furlong HAC Stem CSF                                    | 1,568          | 2.08                   | 1.69                      | [ 0.94 , 2.44] | Inferior by $\geq 100\%$  | <0.001  |
| [CoC] Furlong HAC Stem Furlong HAC CSF Plus                   | 8,977          | 1.59                   | 1.20                      | [ 0.83 , 1.57] | Inferior by $\geq 100\%$  | <0.001  |
| [CoC] Furlong HAC Stem Furlong Threaded                       | 323            | 2.10                   | 1.71                      | [ 0.14 , 3.28] | Inferior by $\geq 20\%$   | 0.033   |
| [CoC] M/L Taper Cementless Continuum                          | 1,393          | 1.63                   | 1.24                      | [ 0.60 , 1.88] | Inferior by $\geq 100\%$  | <0.001  |
| [CoC] M/L Taper Cementless Trilogy IT                         | 257            | 2.94                   | 2.55                      | [ 0.93 , 4.18] | Inferior by $\geq 100\%$  | 0.002   |
| [CoC] M/L Taper Kinectiv Cementless Continuum                 | 258            | 3.39                   | 3.00                      | [ 0.91 , 5.08] | Inferior by $\geq 100\%$  | 0.005   |
| [CoC] Metafix Stem Trinity                                    | 813            | 1.29                   | 0.90                      | [ 0.24 , 1.55] | Inferior by $\geq 20\%$   | 0.007   |
| [CoC] Omnifit Cementless Stem Trident                         | 486            | 1.99                   | 1.60                      | [ 0.34 , 2.85] | Inferior by $\geq 20\%$   | 0.013   |
| [CoC] Polarstem Cementless R3 Cementless                      | 800            | 0.78                   | 0.39                      | [-0.20 , 0.97] | Non-inferiority not shown | 0.195   |
| [CoC] S-Rom Cementless Stem Pinnacle                          | 543            | 3.12                   | 2.73                      | [ 1.38 , 4.08] | Inferior by $\geq 100\%$  | <0.001  |
| [CoC] SL-Plus Cementless Stem EP-Fit Plus                     | 1,202          | 3.46                   | 3.07                      | [ 2.03 , 4.12] | Inferior by $\geq 100\%$  | <0.001  |
| [CoC] SL-Plus Cementless Stem R3 Cementless                   | 539            | 0.80                   | 0.41                      | [-0.35 , 1.16] | Non-inferiority not shown | 0.292   |
| [CoC] SPS Modular April - Ceramic                             | 593            | 1.50                   | 1.11                      | [ 0.14 , 2.07] | Inferior by $\geq 20\%$   | 0.025   |
| [CoC] Summit Cementless Stem Pinnacle                         | 482            | 1.33                   | 0.94                      | [ 0.02 , 1.87] | Non-inferiority not shown | 0.046   |
| [CoC] Synergy Cementless Stem R3 Cementless                   | 280            | 0.96                   | 0.57                      | [-0.41 , 1.54] | Non-inferiority not shown | 0.257   |

|    |                                                               |       |      |       |                |                           |        |
|----|---------------------------------------------------------------|-------|------|-------|----------------|---------------------------|--------|
| 1  | [CoC] Taperloc Cementless Stem Exceed ABT                     | 6,704 | 1.52 | 1.13  | [ 0.75 , 1.51] | Inferior by $\geq 100\%$  | <0.001 |
| 2  | [CoC] Trilock BPS Pinnacle                                    | 341   | 2.06 | 1.67  | [ 0.36 , 2.98] | Inferior by $\geq 20\%$   | 0.012  |
| 3  | [CoC] miniHip Trinity                                         | 713   | 1.91 | 1.52  | [ 0.64 , 2.41] | Inferior by $\geq 100\%$  | 0.001  |
| 4  | [CoP] Accolade Trident                                        | 3,079 | 1.52 | 1.12  | [ 0.67 , 1.58] | Inferior by $\geq 100\%$  | <0.001 |
| 5  | [CoP] C-Stem AMT Cemented Stem Marathon                       | 321   | 0.80 | 0.41  | [-0.34 , 1.15] | Non-inferiority not shown | 0.285  |
| 6  | [CoP] C-Stem AMT Cemented Stem Pinnacle                       | 346   | 1.63 | 1.24  | [ 0.36 , 2.12] | Inferior by $\geq 20\%$   | 0.006  |
| 7  | [CoP] C-Stem Cemented Stem Elite Plus Ogee                    | 607   | 0.57 | 0.18  | [-0.45 , 0.80] | Non-inferiority not shown | 0.583  |
| 8  | [CoP] C-Stem Cemented Stem Marathon                           | 1,150 | 1.03 | 0.64  | [ 0.10 , 1.19] | Inferior by $\geq 20\%$   | 0.021  |
| 9  | [CoP] C-Stem Cemented Stem Opera                              | 785   | 0.63 | 0.23  | [-0.38 , 0.85] | Non-inferiority not shown | 0.457  |
| 10 | [CoP] C-Stem Cemented Stem Wroblewski Golf Ball               | 913   | 0.69 | 0.30  | [-0.29 , 0.88] | Non-inferiority not shown | 0.320  |
| 11 | [CoP] CLS Cementless Stem Trilogy                             | 283   | 0.59 | 0.20  | [-0.67 , 1.06] | Non-inferiority not shown | 0.656  |
| 12 | [CoP] CPT Trilogy                                             | 1,321 | 1.47 | 1.08  | [ 0.59 , 1.58] | Inferior by $\geq 100\%$  | <0.001 |
| 13 | [CoP] CPT ZCA                                                 | 349   | 0.39 | -0.01 | [-0.62 , 0.61] | Non-inferiority not shown | 0.987  |
| 14 | [CoP] Corail Charnley and Elite Plus LPW                      | 627   | 1.72 | 1.33  | [ 0.32 , 2.34] | Inferior by $\geq 20\%$   | 0.010  |
| 15 | [CoP] Corail Duraloc Cementless Cup                           | 301   | 4.40 | 4.01  | [ 1.74 , 6.28] | Inferior by $\geq 100\%$  | 0.001  |
| 16 | [CoP] Corail Elite Plus Cemented Cup                          | 409   | 0.95 | 0.56  | [-0.32 , 1.43] | Non-inferiority not shown | 0.214  |
| 17 | [CoP] Corail Elite Plus Ogee                                  | 464   | 1.70 | 1.31  | [ 0.17 , 2.46] | Inferior by $\geq 20\%$   | 0.024  |
| 18 | [CoP] Corail Marathon                                         | 1,309 | 1.12 | 0.73  | [ 0.20 , 1.26] | Inferior by $\geq 20\%$   | 0.007  |
| 19 | [CoP] Corail Pinnacle                                         | 8,130 | 1.21 | 0.82  | [ 0.48 , 1.16] | Inferior by $\geq 100\%$  | <0.001 |
| 20 | [CoP] Corail Trabecular Metal Modular Cementless Cup          | 335   | 2.76 | 2.36  | [ 0.85 , 3.88] | Inferior by $\geq 100\%$  | 0.002  |
| 21 | [CoP] Corail Trident                                          | 300   | 0.26 | -0.13 | [-0.72 , 0.45] | Non-inferiority not shown | 0.660  |
| 22 | [CoP] Corail Trilogy                                          | 654   | 1.31 | 0.92  | [ 0.02 , 1.81] | Non-inferiority not shown | 0.045  |
| 23 | [CoP] Excia Cementless Plasmacup SC                           | 301   | 0.96 | 0.57  | [-0.32 , 1.47] | Non-inferiority not shown | 0.210  |
| 24 | [CoP] Exeter V40 Charnley and Elite Plus LPW                  | 674   | 1.59 | 1.20  | [ 0.32 , 2.07] | Inferior by $\geq 20\%$   | 0.008  |
| 25 | [CoP] Exeter V40 Elite Plus Ogee                              | 1,190 | 0.70 | 0.31  | [-0.20 , 0.81] | Non-inferiority not shown | 0.231  |
| 26 | [CoP] Exeter V40 Exeter Contemporary Flanged                  | 2,995 | 0.99 | 0.60  | [ 0.18 , 1.03] | Inferior by $\geq 20\%$   | 0.005  |
| 27 | [CoP] Exeter V40 Exeter Contemporary Hooded                   | 779   | 2.03 | 1.64  | [ 0.70 , 2.57] | Inferior by $\geq 100\%$  | 0.001  |
| 28 | [CoP] Exeter V40 Exeter Duration                              | 775   | 0.66 | 0.27  | [-0.33 , 0.88] | Non-inferiority not shown | 0.378  |
| 29 | [CoP] Exeter V40 Exeter X3 Rimfit                             | 2,175 | 0.99 | 0.60  | [ 0.18 , 1.02] | Inferior by $\geq 20\%$   | 0.005  |
| 30 | [CoP] Exeter V40 Marathon                                     | 485   | 0.70 | 0.31  | [-0.34 , 0.96] | Non-inferiority not shown | 0.349  |
| 31 | [CoP] Exeter V40 Pinnacle                                     | 542   | 1.14 | 0.75  | [ 0.07 , 1.42] | Non-inferiority not shown | 0.030  |
| 32 | [CoP] Exeter V40 Trident                                      | 4,857 | 0.88 | 0.48  | [ 0.14 , 0.83] | Inferior by $\geq 20\%$   | 0.006  |
| 33 | [CoP] Exeter V40 Trilogy                                      | 1,945 | 1.05 | 0.66  | [ 0.14 , 1.17] | Inferior by $\geq 20\%$   | 0.013  |
| 34 | [CoP] Exeter V40 Tritanium                                    | 437   | 1.91 | 1.52  | [ 0.60 , 2.45] | Inferior by $\geq 100\%$  | 0.001  |
| 35 | [CoP] Furlong HAC Stem CSF                                    | 6,284 | 1.26 | 0.87  | [ 0.48 , 1.26] | Inferior by $\geq 100\%$  | <0.001 |
| 36 | [CoP] Furlong HAC Stem Furlong HAC CSF Plus                   | 1,538 | 1.84 | 1.45  | [ 0.81 , 2.09] | Inferior by $\geq 100\%$  | <0.001 |
| 37 | [CoP] Furlong HAC Stem Furlong Threaded                       | 388   | 0.50 | 0.11  | [-0.64 , 0.86] | Non-inferiority not shown | 0.778  |
| 38 | [CoP] M/L Taper Cementless Continuum                          | 391   | 2.79 | 2.40  | [ 1.26 , 3.53] | Inferior by $\geq 100\%$  | <0.001 |
| 39 | [CoP] Muller Straight Stem Original ME Muller Low Profile Cup | 364   | 1.22 | 0.83  | [-0.19 , 1.85] | Non-inferiority not shown | 0.110  |
| 40 | [CoP] SL-Plus Cementless Stem Bicon-Plus                      | 620   | 2.56 | 2.17  | [ 0.93 , 3.40] | Inferior by $\geq 100\%$  | 0.001  |
| 41 | [CoP] SL-Plus Cementless Stem EP-Fit Plus                     | 958   | 1.89 | 1.50  | [ 0.61 , 2.39] | Inferior by $\geq 100\%$  | 0.001  |
| 42 | [CoP] SP II Cemented Stem Interplanta                         | 310   | 0.00 | --    | [ -- , -- ]    | No failures to date       |        |
| 43 | [CoP] Stanmore Modular Stem Stanmore-Arcom Cup                | 355   | 1.19 | 0.80  | [-0.28 , 1.88] | Non-inferiority not shown | 0.145  |
| 44 | [CoP] Taperloc Cementless Stem Exceed ABT                     | 1,879 | 1.07 | 0.68  | [ 0.23 , 1.13] | Inferior by $\geq 20\%$   | 0.003  |
| 45 | [CoP] Versys Cementless Stem Trilogy                          | 363   | 1.07 | 0.68  | [-0.40 , 1.76] | Non-inferiority not shown | 0.220  |
| 46 | [MoP] ABG II Monolithic Cementless Stem ABG II Cementless Cup | 442   | 1.70 | 1.31  | [ 0.10 , 2.51] | Inferior by $\geq 20\%$   | 0.033  |

|    |                                                            |       |      |       |                |                           |        |
|----|------------------------------------------------------------|-------|------|-------|----------------|---------------------------|--------|
| 1  | [MoP] ABG II Monolithic Cementless Stem Trident            | 440   | 3.19 | 2.80  | [ 1.18 , 4.42] | Inferior by $\geq 100\%$  | 0.001  |
| 2  | [MoP] Accolade Trident                                     | 9,084 | 2.01 | 1.62  | [ 1.23 , 2.02] | Inferior by $\geq 100\%$  | <0.001 |
| 3  | [MoP] Anthology R3 Cementless                              | 1,155 | 1.76 | 1.36  | [ 0.73 , 2.00] | Inferior by $\geq 100\%$  | <0.001 |
| 4  | [MoP] Bimetric Cementless Stem Mallory-Head Cementless Cup | 359   | 2.05 | 1.66  | [ 0.42 , 2.90] | Inferior by $\geq 100\%$  | 0.009  |
| 5  | [MoP] C-Stem AMT Cemented Stem Charnley and Elite Plus LPW | 2,153 | 1.15 | 0.76  | [ 0.26 , 1.26] | Inferior by $\geq 20\%$   | 0.003  |
| 6  | [MoP] C-Stem AMT Cemented Stem Elite Plus Cemented Cup     | 612   | 0.88 | 0.48  | [-0.27 , 1.24] | Non-inferiority not shown | 0.209  |
| 7  | [MoP] C-Stem AMT Cemented Stem Ogee                        | 1,608 | 0.77 | 0.38  | [-0.09 , 0.85] | Non-inferiority not shown | 0.116  |
| 8  | [MoP] C-Stem AMT Cemented Stem Marathon                    | 1,157 | 0.93 | 0.54  | [ 0.07 , 1.00] | Non-inferiority not shown | 0.023  |
| 9  | [MoP] C-Stem AMT Cemented Stem Pinnacle                    | 1,478 | 1.22 | 0.83  | [ 0.35 , 1.31] | Inferior by $\geq 20\%$   | 0.001  |
| 10 | [MoP] C-Stem Cemented Stem Charnley Ogee                   | 847   | 1.31 | 0.92  | [ 0.15 , 1.68] | Inferior by $\geq 20\%$   | 0.019  |
| 11 | [MoP] C-Stem Cemented Stem Charnley and Elite Plus LPW     | 1,594 | 1.05 | 0.66  | [ 0.10 , 1.23] | Inferior by $\geq 20\%$   | 0.022  |
| 12 | [MoP] C-Stem Cemented Stem Duraloc Cementless Cup          | 535   | 2.10 | 1.71  | [ 0.50 , 2.92] | Inferior by $\geq 100\%$  | 0.006  |
| 13 | [MoP] C-Stem Cemented Stem Elite Plus Cemented Cup         | 650   | 0.56 | 0.17  | [-0.45 , 0.79] | Non-inferiority not shown | 0.590  |
| 14 | [MoP] C-Stem Cemented Stem Elite Plus Ogee                 | 3,208 | 0.88 | 0.49  | [ 0.07 , 0.91] | Non-inferiority not shown | 0.022  |
| 15 | [MoP] C-Stem Cemented Stem Marathon                        | 1,556 | 0.92 | 0.53  | [ 0.05 , 1.00] | Non-inferiority not shown | 0.029  |
| 16 | [MoP] C-Stem Cemented Stem Opera                           | 1,363 | 1.04 | 0.65  | [ 0.05 , 1.25] | Non-inferiority not shown | 0.033  |
| 17 | [MoP] C-Stem Cemented Stem Pinnacle                        | 417   | 1.56 | 1.17  | [ 0.06 , 2.28] | Non-inferiority not shown | 0.039  |
| 18 | [MoP] C-Stem Cemented Stem Polarcup Cementless             | 268   | 0.71 | 0.32  | [-0.70 , 1.35] | Non-inferiority not shown | 0.539  |
| 19 | [MoP] C-Stem Cemented Stem Trilogy                         | 364   | 0.53 | 0.14  | [-0.65 , 0.93] | Non-inferiority not shown | 0.730  |
| 20 | [MoP] C-Stem Cemented Stem Wroblewski Golf Ball            | 978   | 0.94 | 0.55  | [-0.10 , 1.20] | Non-inferiority not shown | 0.098  |
| 21 | [MoP] CCA Cemented Stem CCB Cup                            | 1,129 | 0.57 | 0.18  | [-0.31 , 0.68] | Non-inferiority not shown | 0.469  |
| 22 | [MoP] CLS Cementless Stem Allofit                          | 600   | 2.56 | 2.17  | [ 0.93 , 3.40] | Inferior by $\geq 100\%$  | 0.001  |
| 23 | [MoP] CLS Cementless Stem Trilogy                          | 559   | 2.80 | 2.40  | [ 1.06 , 3.75] | Inferior by $\geq 100\%$  | <0.001 |
| 24 | [MoP] CMK Modular Cemented Stem CMK Cemented Cup           | 462   | 0.41 | 0.02  | [-0.62 , 0.67] | Non-inferiority not shown | 0.943  |
| 25 | [MoP] CPCS Opera                                           | 1,174 | 0.82 | 0.42  | [-0.16 , 1.01] | Non-inferiority not shown | 0.152  |
| 26 | [MoP] CPCS Polarcup Cementless                             | 400   | 0.49 | 0.09  | [-0.64 , 0.83] | Non-inferiority not shown | 0.801  |
| 27 | [MoP] CPCS Reflection Cemented                             | 382   | 1.02 | 0.63  | [-0.14 , 1.40] | Non-inferiority not shown | 0.107  |
| 28 | [MoP] CPS Plus Cenator Cemented Cup                        | 381   | 0.26 | -0.13 | [-0.72 , 0.46] | Non-inferiority not shown | 0.662  |
| 29 | [MoP] CPS Plus EP-Fit Plus                                 | 301   | 1.58 | 1.19  | [-0.21 , 2.60] | Non-inferiority not shown | 0.097  |
| 30 | [MoP] CPS Plus Opera                                       | 490   | 1.55 | 1.16  | [ 0.05 , 2.27] | Non-inferiority not shown | 0.040  |
| 31 | [MoP] CPT Allofit                                          | 686   | 0.55 | 0.16  | [-0.38 , 0.69] | Non-inferiority not shown | 0.561  |
| 32 | [MoP] CPT Continuum                                        | 480   | 2.60 | 2.20  | [ 1.33 , 3.08] | Inferior by $\geq 100\%$  | <0.001 |
| 33 | [MoP] CPT Elite Plus Ogee                                  | 2,410 | 1.38 | 0.99  | [ 0.47 , 1.52] | Inferior by $\geq 100\%$  | <0.001 |
| 34 | [MoP] CPT Exceed                                           | 284   | 3.02 | 2.63  | [ 0.66 , 4.59] | Inferior by $\geq 100\%$  | 0.009  |
| 35 | [MoP] CPT Exeter Contemporary Flanged                      | 386   | 2.10 | 1.71  | [ 0.50 , 2.92] | Inferior by $\geq 100\%$  | 0.006  |
| 36 | [MoP] CPT Opera                                            | 406   | 1.40 | 1.01  | [-0.14 , 2.16] | Non-inferiority not shown | 0.086  |
| 37 | [MoP] CPT Original ME Muller Low Profile Cup               | 833   | 1.20 | 0.81  | [ 0.09 , 1.53] | Inferior by $\geq 20\%$   | 0.028  |
| 38 | [MoP] CPT Pinnacle                                         | 753   | 1.70 | 1.31  | [ 0.38 , 2.24] | Inferior by $\geq 20\%$   | 0.006  |
| 39 | [MoP] CPT Trabecular Metal Modular Cementless Cup          | 891   | 1.66 | 1.27  | [ 0.50 , 2.03] | Inferior by $\geq 100\%$  | 0.001  |
| 40 | [MoP] CPT Trilogy                                          | 8,372 | 1.37 | 0.98  | [ 0.62 , 1.34] | Inferior by $\geq 100\%$  | <0.001 |
| 41 | [MoP] CPT Trilogy IT                                       | 450   | 2.89 | 2.50  | [ 1.61 , 3.40] | Inferior by $\geq 100\%$  | <0.001 |
| 42 | [MoP] CPT ZCA                                              | 7,529 | 1.39 | 1.00  | [ 0.63 , 1.37] | Inferior by $\geq 100\%$  | <0.001 |
| 43 | [MoP] Centrament Chirulen                                  | 378   | 0.24 | -0.15 | [-0.71 , 0.41] | Non-inferiority not shown | 0.608  |
| 44 | [MoP] Charnley Cemented Stem Charnley Cemented Cup         | 4,078 | 1.11 | 0.71  | [ 0.29 , 1.14] | Inferior by $\geq 20\%$   | 0.001  |
| 45 | [MoP] Charnley Cemented Stem Charnley Ogee                 | 8,701 | 1.18 | 0.79  | [ 0.43 , 1.15] | Inferior by $\geq 100\%$  | <0.001 |
| 46 | [MoP] Charnley Cemented Stem Charnley and Elite Plus LPW   | 5,770 | 0.72 | 0.32  | [-0.03 , 0.68] | Non-inferiority not shown | 0.075  |



|    |                                                            |        |      |       |                |                           |        |
|----|------------------------------------------------------------|--------|------|-------|----------------|---------------------------|--------|
| 1  | [MoP] Charnley Cemented Stem Opera                         | 1,229  | 0.85 | 0.46  | [-0.12 , 1.04] | Non-inferiority not shown | 0.119  |
| 2  | [MoP] Charnley Cemented Stem Wroblewski Golf Ball          | 990    | 1.50 | 1.10  | [ 0.32 , 1.89] | Inferior by $\geq 20\%$   | 0.006  |
| 3  | [MoP] Charnley Modular Charnley and Elite Plus LPW         | 363    | 0.27 | -0.12 | [-0.73 , 0.49] | Non-inferiority not shown | 0.702  |
| 4  | [MoP] Corail Charnley and Elite Plus LPW                   | 723    | 1.36 | 0.97  | [ 0.18 , 1.76] | Inferior by $\geq 20\%$   | 0.017  |
| 5  | [MoP] Corail Duraloc Cementless Cup                        | 3,449  | 1.41 | 1.02  | [ 0.54 , 1.50] | Inferior by $\geq 100\%$  | <0.001 |
| 6  | [MoP] Corail Elite Plus Cemented Cup                       | 964    | 0.81 | 0.42  | [-0.19 , 1.02] | Non-inferiority not shown | 0.175  |
| 7  | [MoP] Corail Elite Plus Ogee                               | 1,407  | 1.22 | 0.83  | [ 0.24 , 1.42] | Inferior by $\geq 20\%$   | 0.005  |
| 8  | [MoP] Corail Exeter Contemporary Flanged                   | 571    | 1.13 | 0.73  | [-0.06 , 1.53] | Non-inferiority not shown | 0.070  |
| 9  | [MoP] Corail Marathon                                      | 2,848  | 1.05 | 0.66  | [ 0.24 , 1.07] | Inferior by $\geq 20\%$   | 0.002  |
| 10 | [MoP] Corail Pinnacle                                      | 28,253 | 1.37 | 0.98  | [ 0.67 , 1.29] | Inferior by $\geq 100\%$  | <0.001 |
| 11 | [MoP] Corail Pinnacle Gription                             | 382    | 1.54 | 1.15  | [ 0.34 , 1.95] | Inferior by $\geq 20\%$   | 0.005  |
| 12 | [MoP] Corail Trident                                       | 585    | 1.54 | 1.15  | [ 0.33 , 1.96] | Inferior by $\geq 20\%$   | 0.006  |
| 13 | [MoP] Corail Trilogy                                       | 1,791  | 1.14 | 0.74  | [ 0.20 , 1.29] | Inferior by $\geq 20\%$   | 0.007  |
| 14 | [MoP] Elite Plus Cemented Stem Charnley and Elite Plus LPW | 331    | 1.66 | 1.27  | [-0.08 , 2.62] | Non-inferiority not shown | 0.065  |
| 15 | [MoP] Elite Plus Cemented Stem Elite Plus Ogee             | 576    | 0.34 | -0.05 | [-0.60 , 0.50] | Non-inferiority not shown | 0.848  |
| 16 | [MoP] Excia Cementless Plasmacup SC                        | 316    | 3.20 | 2.81  | [ 1.00 , 4.62] | Inferior by $\geq 100\%$  | 0.002  |
| 17 | [MoP] Exeter Elite Plus Ogee                               | 282    | 0.33 | -0.06 | [-0.77 , 0.65] | Non-inferiority not shown | 0.871  |
| 18 | [MoP] Exeter V40 ABG II Cementless Cup                     | 734    | 1.28 | 0.89  | [ 0.05 , 1.73] | Non-inferiority not shown | 0.038  |
| 19 | [MoP] Exeter V40 Cenator Cemented Cup                      | 2,129  | 1.40 | 1.01  | [ 0.45 , 1.57] | Inferior by $\geq 100\%$  | <0.001 |
| 20 | [MoP] Exeter V40 Charnley Cemented Cup                     | 314    | 0.87 | 0.48  | [-0.55 , 1.51] | Non-inferiority not shown | 0.358  |
| 21 | [MoP] Exeter V40 Charnley Ogee                             | 1,315  | 0.95 | 0.56  | [-0.02 , 1.14] | Non-inferiority not shown | 0.057  |
| 22 | [MoP] Exeter V40 Charnley and Elite Plus LPW               | 2,477  | 1.25 | 0.86  | [ 0.37 , 1.35] | Inferior by $\geq 20\%$   | 0.001  |
| 23 | [MoP] Exeter V40 Duraloc Cementless Cup                    | 1,061  | 1.46 | 1.06  | [ 0.30 , 1.83] | Inferior by $\geq 20\%$   | 0.006  |
| 24 | [MoP] Exeter V40 EP-Fit Plus                               | 539    | 1.44 | 1.05  | [ 0.02 , 2.08] | Non-inferiority not shown | 0.046  |
| 25 | [MoP] Exeter V40 Elite Plus Cemented Cup                   | 3,599  | 0.58 | 0.19  | [-0.18 , 0.56] | Non-inferiority not shown | 0.314  |
| 26 | [MoP] Exeter V40 Elite Plus Ogee                           | 16,477 | 0.79 | 0.40  | [ 0.08 , 0.71] | Inferior by $\geq 20\%$   | 0.014  |
| 27 | [MoP] Exeter V40 Exceed                                    | 494    | 0.94 | 0.55  | [-0.32 , 1.42] | Non-inferiority not shown | 0.215  |
| 28 | [MoP] Exeter V40 Exceed ABT                                | 456    | 0.60 | 0.21  | [-0.45 , 0.87] | Non-inferiority not shown | 0.528  |
| 29 | [MoP] Exeter V40 Exeter Contemporary Flanged               | 40,794 | 0.85 | 0.46  | [ 0.15 , 0.76] | Inferior by $\geq 20\%$   | 0.003  |
| 30 | [MoP] Exeter V40 Exeter Contemporary Hooded                | 16,021 | 1.53 | 1.14  | [ 0.80 , 1.47] | Inferior by $\geq 100\%$  | <0.001 |
| 31 | [MoP] Exeter V40 Exeter Duration                           | 12,935 | 1.23 | 0.84  | [ 0.50 , 1.18] | Inferior by $\geq 100\%$  | <0.001 |
| 32 | [MoP] Exeter V40 Exeter X3 Rimfit                          | 5,262  | 0.96 | 0.57  | [ 0.23 , 0.92] | Inferior by $\geq 20\%$   | 0.001  |
| 33 | [MoP] Exeter V40 Furlong HAC CSF Plus                      | 504    | 0.35 | -0.04 | [-0.53 , 0.46] | Non-inferiority not shown | 0.882  |
| 34 | [MoP] Exeter V40 Marathon                                  | 1,300  | 1.05 | 0.66  | [ 0.15 , 1.18] | Inferior by $\geq 20\%$   | 0.012  |
| 35 | [MoP] Exeter V40 Opera                                     | 2,373  | 0.81 | 0.42  | [-0.03 , 0.88] | Non-inferiority not shown | 0.067  |
| 36 | [MoP] Exeter V40 Pinnacle                                  | 2,590  | 1.18 | 0.79  | [ 0.35 , 1.24] | Inferior by $\geq 20\%$   | <0.001 |
| 37 | [MoP] Exeter V40 R3 Cementless                             | 461    | 1.23 | 0.84  | [ 0.10 , 1.57] | Inferior by $\geq 20\%$   | 0.025  |
| 38 | [MoP] Exeter V40 Reflection Cementless                     | 2,035  | 1.12 | 0.73  | [ 0.19 , 1.26] | Inferior by $\geq 20\%$   | 0.007  |
| 39 | [MoP] Exeter V40 Trabecular Metal Modular Cementless Cup   | 411    | 1.22 | 0.83  | [-0.12 , 1.77] | Non-inferiority not shown | 0.086  |
| 40 | [MoP] Exeter V40 Trabecular Metal Natural Cup              | 318    | 3.43 | 3.04  | [ 1.11 , 4.97] | Inferior by $\geq 100\%$  | 0.002  |
| 41 | [MoP] Exeter V40 Trident                                   | 17,802 | 1.10 | 0.71  | [ 0.39 , 1.02] | Inferior by $\geq 20\%$   | <0.001 |
| 42 | [MoP] Exeter V40 Trilogy                                   | 8,482  | 0.92 | 0.53  | [ 0.19 , 0.88] | Inferior by $\geq 20\%$   | 0.003  |
| 43 | [MoP] Exeter V40 Tritanium                                 | 475    | 2.06 | 1.67  | [ 0.71 , 2.63] | Inferior by $\geq 100\%$  | 0.001  |
| 44 | [MoP] Exeter V40 Ultima Cemented Cup                       | 1,139  | 1.56 | 1.17  | [ 0.41 , 1.92] | Inferior by $\geq 100\%$  | 0.002  |
| 45 | [MoP] Exeter V40 ZCA                                       | 274    | 0.36 | -0.03 | [-0.79 , 0.73] | Non-inferiority not shown | 0.933  |
| 46 | [MoP] Furlong Cemented Stem JRI Cemented Cup               | 1,478  | 1.38 | 0.99  | [ 0.34 , 1.63] | Inferior by $\geq 20\%$   | 0.003  |

|    |                                                               |       |      |       |                |                           |        |
|----|---------------------------------------------------------------|-------|------|-------|----------------|---------------------------|--------|
| 1  | [MoP] Furlong HAC Stem CSF                                    | 6,640 | 2.07 | 1.68  | [ 1.25 , 2.11] | Inferior by $\geq 100\%$  | <0.001 |
| 2  | [MoP] Furlong HAC Stem Furlong HAC CSF Plus                   | 2,998 | 2.24 | 1.85  | [ 1.33 , 2.37] | Inferior by $\geq 100\%$  | <0.001 |
| 3  | [MoP] Furlong HAC Stem Furlong Threaded                       | 479   | 2.13 | 1.74  | [ 0.46 , 3.02] | Inferior by $\geq 100\%$  | 0.008  |
| 4  | [MoP] Furlong HAC Stem Trilogy                                | 341   | 1.90 | 1.51  | [ 0.09 , 2.94] | Inferior by $\geq 20\%$   | 0.038  |
| 5  | [MoP] M/L Taper Cementless Allofit                            | 543   | 1.27 | 0.88  | [ 0.00 , 1.76] | Non-inferiority not shown | 0.049  |
| 6  | [MoP] M/L Taper Cementless Continuum                          | 612   | 1.40 | 1.01  | [ 0.28 , 1.74] | Inferior by $\geq 20\%$   | 0.007  |
| 7  | [MoP] M/L Taper Cementless Trilogy                            | 475   | 2.08 | 1.69  | [ 0.63 , 2.74] | Inferior by $\geq 100\%$  | 0.002  |
| 8  | [MoP] M/L Taper Cementless Trilogy IT                         | 270   | 1.86 | 1.47  | [ 0.46 , 2.47] | Inferior by $\geq 100\%$  | 0.004  |
| 9  | [MoP] MS-30 Allofit                                           | 314   | 0.57 | 0.17  | [-0.66 , 1.01] | Non-inferiority not shown | 0.683  |
| 10 | [MoP] MS-30 Original ME Muller Low Profile Cup                | 756   | 0.58 | 0.19  | [-0.36 , 0.74] | Non-inferiority not shown | 0.497  |
| 11 | [MoP] Mem Original ME Muller Low Profile Cup                  | 337   | 0.56 | 0.17  | [-0.66 , 1.00] | Non-inferiority not shown | 0.688  |
| 12 | [MoP] Muller Straight Stem Centerpulse Muller                 | 502   | 0.95 | 0.56  | [-0.32 , 1.43] | Non-inferiority not shown | 0.213  |
| 13 | [MoP] Muller Straight Stem Original ME Muller Low Profile Cup | 1,412 | 0.81 | 0.41  | [-0.09 , 0.92] | Non-inferiority not shown | 0.106  |
| 14 | [MoP] Muller-Biomet Apollo                                    | 1,949 | 1.24 | 0.85  | [ 0.30 , 1.41] | Inferior by $\geq 20\%$   | 0.003  |
| 15 | [MoP] Muller-Biomet Original ME Muller Low Profile Cup        | 831   | 1.56 | 1.17  | [ 0.31 , 2.03] | Inferior by $\geq 20\%$   | 0.008  |
| 16 | [MoP] Omnifit Cemented Stem ODC                               | 880   | 1.40 | 1.01  | [ 0.20 , 1.82] | Inferior by $\geq 20\%$   | 0.015  |
| 17 | [MoP] Omnifit Cemented Stem Trident                           | 270   | 0.36 | -0.03 | [-0.80 , 0.74] | Non-inferiority not shown | 0.947  |
| 18 | [MoP] Omnifit Cementless Stem Secure Fit Cementless Cup       | 283   | 0.69 | 0.30  | [-0.70 , 1.30] | Non-inferiority not shown | 0.554  |
| 19 | [MoP] Omnifit Cementless Stem Trident                         | 426   | 3.34 | 2.95  | [ 1.31 , 4.58] | Inferior by $\geq 100\%$  | <0.001 |
| 20 | [MoP] P10 Muller Original ME Muller Low Profile Cup           | 415   | 0.96 | 0.57  | [-0.33 , 1.47] | Non-inferiority not shown | 0.213  |
| 21 | [MoP] Polarstem Cementless R3 Cementless                      | 1,068 | 0.96 | 0.57  | [ 0.14 , 1.00] | Inferior by $\geq 20\%$   | 0.010  |
| 22 | [MoP] SL-Plus Cementless Stem EP-Fit Plus                     | 2,023 | 2.60 | 2.21  | [ 1.52 , 2.90] | Inferior by $\geq 100\%$  | <0.001 |
| 23 | [MoP] SP II Cemented Stem Interplanta                         | 625   | 2.72 | 2.33  | [ 1.09 , 3.57] | Inferior by $\geq 100\%$  | <0.001 |
| 24 | [MoP] SP II Cemented Stem Link Flange Cup                     | 274   | 0.69 | 0.29  | [-0.70 , 1.29] | Non-inferiority not shown | 0.560  |
| 25 | [MoP] Spectron Reflection Cementless                          | 298   | 1.24 | 0.84  | [-0.39 , 2.08] | Non-inferiority not shown | 0.182  |
| 26 | [MoP] Stanmore Modular Stem Elite Plus Cemented Cup           | 534   | 0.35 | -0.05 | [-0.61 , 0.51] | Non-inferiority not shown | 0.872  |
| 27 | [MoP] Stanmore Modular Stem SHP Cup                           | 931   | 0.82 | 0.43  | [-0.18 , 1.03] | Non-inferiority not shown | 0.169  |
| 28 | [MoP] Stanmore Modular Stem Stanmore-Arcom Cup                | 3,798 | 1.09 | 0.70  | [ 0.27 , 1.12] | Inferior by $\geq 20\%$   | 0.001  |
| 29 | [MoP] Synergy Cementless Stem R3 Cementless                   | 1,057 | 1.25 | 0.86  | [ 0.31 , 1.41] | Inferior by $\geq 20\%$   | 0.002  |
| 30 | [MoP] Synergy Cementless Stem Reflection Cementless           | 1,449 | 0.87 | 0.47  | [-0.08 , 1.03] | Non-inferiority not shown | 0.092  |
| 31 | [MoP] Taperfit Cemented Stem Atlas IIIp                       | 444   | 0.84 | 0.45  | [-0.34 , 1.24] | Non-inferiority not shown | 0.268  |
| 32 | [MoP] Taperloc Cemented Stem Exceed ABT                       | 280   | 0.97 | 0.58  | [-0.21 , 1.38] | Non-inferiority not shown | 0.152  |
| 33 | [MoP] Taperloc Cementless Stem Exceed                         | 553   | 1.20 | 0.81  | [-0.12 , 1.73] | Non-inferiority not shown | 0.089  |
| 34 | [MoP] Taperloc Cementless Stem Exceed ABT                     | 3,732 | 1.75 | 1.36  | [ 0.91 , 1.80] | Inferior by $\geq 100\%$  | <0.001 |
| 35 | [MoP] Trilock BPS Pinnacle                                    | 264   | 1.65 | 1.26  | [ 0.01 , 2.51] | Non-inferiority not shown | 0.048  |
| 36 | [MoP] Trilock BPS Pinnacle Gription                           | 275   | 1.37 | 0.98  | [-0.19 , 2.15] | Non-inferiority not shown | 0.100  |
| 37 | [MoP] VerSys Cemented Stem Trilogy                            | 263   | 1.11 | 0.71  | [-0.56 , 1.99] | Non-inferiority not shown | 0.273  |
| 38 | [MoP] Versys Cementless Stem Trilogy                          | 860   | 4.01 | 3.62  | [ 2.32 , 4.91] | Inferior by $\geq 100\%$  | <0.001 |

**Supplementary table 1b: Difference in Kaplan-Meier failure estimate between a contemporary reference and implants with at least 250 at risk at 5 years since primary**

| Stem/cup brand                                                | Number at risk | Cumulative failure (%) | Difference in failure (%) | 95% CI         | Equivalence status        | p-value |
|---------------------------------------------------------------|----------------|------------------------|---------------------------|----------------|---------------------------|---------|
| [CoP] MS-30 Original ME Muller Low Profile Cup                | 1,125          | 0.55                   | [REFERENCE]               |                |                           |         |
| [CoC] ABG II Monolithic Cementless Stem ABG II Cementless Cup | 1,020          | 2.29                   | 1.73                      | [ 0.77 , 2.70] | Inferior by $\geq 100\%$  | <0.001  |
| [CoC] ABG II Monolithic Cementless Stem Trident               | 834            | 3.07                   | 2.51                      | [ 1.38 , 3.64] | Inferior by $\geq 100\%$  | <0.001  |
| [CoC] Accolade Trident                                        | 5,169          | 2.83                   | 2.27                      | [ 1.74 , 2.81] | Inferior by $\geq 100\%$  | <0.001  |
| [CoC] Bicontact Cementless Stem Plasmacup SC                  | 289            | 1.01                   | 0.46                      | [-0.60 , 1.51] | Non-inferiority not shown | 0.395   |
| [CoC] Bimetric Cementless Stem Exceed ABT                     | 627            | 1.80                   | 1.24                      | [ 0.31 , 2.17] | Inferior by $\geq 20\%$   | 0.009   |
| [CoC] C-Stem AMT Cemented Stem Pinnacle                       | 427            | 1.30                   | 0.74                      | [-0.10 , 1.59] | Non-inferiority not shown | 0.085   |
| [CoC] C-Stem Cemented Stem Pinnacle                           | 310            | 1.44                   | 0.88                      | [-0.42 , 2.19] | Non-inferiority not shown | 0.185   |
| [CoC] CPT Continuum                                           | 379            | 2.40                   | 1.85                      | [ 0.77 , 2.92] | Inferior by $\geq 100\%$  | 0.001   |
| [CoC] CPT Trilogy AB                                          | 468            | 1.70                   | 1.15                      | [-0.02 , 2.31] | Non-inferiority not shown | 0.053   |
| [CoC] Corail DeltaMotion                                      | 633            | 1.64                   | 1.08                      | [ 0.28 , 1.89] | Inferior by $\geq 20\%$   | 0.008   |
| [CoC] Corail Duraloc Option                                   | 1,014          | 2.99                   | 2.44                      | [ 1.35 , 3.52] | Inferior by $\geq 100\%$  | <0.001  |
| [CoC] Corail Pinnacle                                         | 17,510         | 2.40                   | 1.85                      | [ 1.44 , 2.26] | Inferior by $\geq 100\%$  | <0.001  |
| [CoC] Excia Cementless Plasmacup SC                           | 501            | 1.33                   | 0.77                      | [ 0.00 , 1.54] | Non-inferiority not shown | 0.049   |
| [CoC] Exeter V40 ABG II Cementless Cup                        | 1,138          | 1.20                   | 0.64                      | [-0.04 , 1.32] | Non-inferiority not shown | 0.063   |
| [CoC] Exeter V40 Trident                                      | 8,141          | 1.50                   | 0.94                      | [ 0.51 , 1.38] | Inferior by $\geq 20\%$   | <0.001  |
| [CoC] Furlong HAC Stem CSF                                    | 1,502          | 2.59                   | 2.03                      | [ 1.18 , 2.89] | Inferior by $\geq 100\%$  | <0.001  |
| [CoC] Furlong HAC Stem Furlong HAC CSF Plus                   | 5,470          | 1.84                   | 1.28                      | [ 0.84 , 1.73] | Inferior by $\geq 100\%$  | <0.001  |
| [CoC] Furlong HAC Stem Furlong Threaded                       | 318            | 3.01                   | 2.46                      | [ 0.58 , 4.34] | Inferior by $\geq 100\%$  | 0.010   |
| [CoC] M/L Taper Cementless Continuum                          | 607            | 1.71                   | 1.15                      | [ 0.46 , 1.85] | Inferior by $\geq 20\%$   | 0.001   |
| [CoC] Metafix Stem Trinity                                    | 280            | 1.52                   | 0.96                      | [ 0.14 , 1.79] | Inferior by $\geq 20\%$   | 0.022   |
| [CoC] Omnifit Cementless Stem Trident                         | 387            | 3.10                   | 2.54                      | [ 0.95 , 4.13] | Inferior by $\geq 100\%$  | 0.002   |
| [CoC] Polarstem Cementless R3 Cementless                      | 300            | 0.78                   | 0.22                      | [-0.40 , 0.85] | Non-inferiority not shown | 0.487   |
| [CoC] S-Rom Cementless Stem Pinnacle                          | 407            | 4.35                   | 3.79                      | [ 2.12 , 5.46] | Inferior by $\geq 100\%$  | <0.001  |
| [CoC] SL-Plus Cementless Stem EP-Fit Plus                     | 1,115          | 4.96                   | 4.40                      | [ 3.14 , 5.66] | Inferior by $\geq 100\%$  | <0.001  |
| [CoC] SPS Modular April - Ceramic                             | 321            | 2.99                   | 2.43                      | [ 0.95 , 3.92] | Inferior by $\geq 100\%$  | 0.001   |
| [CoC] Summit Cementless Stem Pinnacle                         | 385            | 1.33                   | 0.78                      | [-0.18 , 1.73] | Non-inferiority not shown | 0.110   |
| [CoC] Taperloc Cementless Stem Exceed ABT                     | 3,900          | 1.83                   | 1.27                      | [ 0.80 , 1.74] | Inferior by $\geq 100\%$  | <0.001  |
| [CoP] Accolade Trident                                        | 1,372          | 1.95                   | 1.39                      | [ 0.82 , 1.97] | Inferior by $\geq 100\%$  | <0.001  |
| [CoP] C-Stem Cemented Stem Elite Plus Ogee                    | 474            | 0.75                   | 0.20                      | [-0.56 , 0.96] | Non-inferiority not shown | 0.609   |
| [CoP] C-Stem Cemented Stem Marathon                           | 542            | 1.34                   | 0.79                      | [ 0.10 , 1.47] | Non-inferiority not shown | 0.024   |
| [CoP] C-Stem Cemented Stem Opera                              | 656            | 1.33                   | 0.77                      | [-0.12 , 1.67] | Non-inferiority not shown | 0.091   |
| [CoP] C-Stem Cemented Stem Wroblewski Golf Ball               | 738            | 1.05                   | 0.49                      | [-0.25 , 1.24] | Non-inferiority not shown | 0.196   |
| [CoP] CPT ZCA                                                 | 261            | 0.39                   | -0.17                     | [-0.82 , 0.48] | Non-inferiority not shown | 0.611   |
| [CoP] Corail Charnley and Elite Plus LPW                      | 532            | 1.89                   | 1.33                      | [ 0.25 , 2.42] | Inferior by $\geq 20\%$   | 0.016   |
| [CoP] Corail Duraloc Cementless Cup                           | 289            | 4.72                   | 4.17                      | [ 1.81 , 6.53] | Inferior by $\geq 100\%$  | 0.001   |
| [CoP] Corail Elite Plus Cemented Cup                          | 328            | 1.50                   | 0.95                      | [-0.24 , 2.13] | Non-inferiority not shown | 0.117   |
| [CoP] Corail Elite Plus Ogee                                  | 340            | 2.64                   | 2.08                      | [ 0.61 , 3.55] | Inferior by $\geq 100\%$  | 0.006   |
| [CoP] Corail Marathon                                         | 573            | 1.40                   | 0.84                      | [ 0.19 , 1.49] | Inferior by $\geq 20\%$   | 0.012   |
| [CoP] Corail Pinnacle                                         | 4,134          | 1.74                   | 1.18                      | [ 0.74 , 1.63] | Inferior by $\geq 100\%$  | <0.001  |

|    |                                                               |       |      |      |                |                           |        |
|----|---------------------------------------------------------------|-------|------|------|----------------|---------------------------|--------|
| 1  | [CoP] Corail Trilogy                                          | 592   | 1.61 | 1.06 | [ 0.04 , 2.07] | Non-inferiority not shown | 0.041  |
| 2  | [CoP] Exeter V40 Charnley and Elite Plus LPW                  | 433   | 2.02 | 1.47 | [ 0.38 , 2.55] | Inferior by $\geq 20\%$   | 0.008  |
| 3  | [CoP] Exeter V40 Elite Plus Ogee                              | 858   | 1.08 | 0.53 | [-0.14 , 1.20] | Non-inferiority not shown | 0.122  |
| 4  | [CoP] Exeter V40 Exeter Contemporary Flanged                  | 2,011 | 1.31 | 0.76 | [ 0.23 , 1.28] | Inferior by $\geq 20\%$   | 0.005  |
| 5  | [CoP] Exeter V40 Exeter Contemporary Hooded                   | 593   | 2.58 | 2.03 | [ 0.93 , 3.12] | Inferior by $\geq 100\%$  | <0.001 |
| 6  | [CoP] Exeter V40 Exeter Duration                              | 664   | 0.95 | 0.40 | [-0.36 , 1.16] | Non-inferiority not shown | 0.304  |
| 7  | [CoP] Exeter V40 Exeter X3 Rimfit                             | 363   | 1.16 | 0.60 | [ 0.09 , 1.12] | Non-inferiority not shown | 0.022  |
| 8  | [CoP] Exeter V40 Marathon                                     | 258   | 0.94 | 0.38 | [-0.44 , 1.21] | Non-inferiority not shown | 0.365  |
| 9  | [CoP] Exeter V40 Pinnacle                                     | 297   | 1.53 | 0.98 | [ 0.08 , 1.87] | Non-inferiority not shown | 0.032  |
| 10 | [CoP] Exeter V40 Trident                                      | 2,337 | 1.16 | 0.60 | [ 0.15 , 1.06] | Inferior by $\geq 20\%$   | 0.009  |
| 11 | [CoP] Exeter V40 Trilogy                                      | 1,627 | 1.31 | 0.76 | [ 0.15 , 1.37] | Inferior by $\geq 20\%$   | 0.015  |
| 12 | [CoP] Furlong HAC Stem CSF                                    | 5,425 | 1.65 | 1.09 | [ 0.61 , 1.57] | Inferior by $\geq 100\%$  | <0.001 |
| 13 | [CoP] Furlong HAC Stem Furlong HAC CSF Plus                   | 908   | 2.02 | 1.47 | [ 0.74 , 2.19] | Inferior by $\geq 100\%$  | <0.001 |
| 14 | [CoP] Furlong HAC Stem Furlong Threaded                       | 362   | 1.29 | 0.73 | [-0.45 , 1.91] | Non-inferiority not shown | 0.225  |
| 15 | [CoP] Muller Straight Stem Original ME Muller Low Profile Cup | 298   | 1.22 | 0.67 | [-0.38 , 1.71] | Non-inferiority not shown | 0.210  |
| 16 | [CoP] SL-Plus Cementless Stem Bicon-Plus                      | 558   | 4.05 | 3.50 | [ 1.93 , 5.07] | Inferior by $\geq 100\%$  | <0.001 |
| 17 | [CoP] SL-Plus Cementless Stem EP-Fit Plus                     | 810   | 3.41 | 2.86 | [ 1.65 , 4.06] | Inferior by $\geq 100\%$  | <0.001 |
| 18 | [CoP] Stanmore Modular Stem Stanmore-Arcom Cup                | 257   | 1.19 | 0.64 | [-0.46 , 1.74] | Non-inferiority not shown | 0.257  |
| 19 | [CoP] Taperloc Cementless Stem Exceed ABT                     | 775   | 1.43 | 0.87 | [ 0.26 , 1.49] | Inferior by $\geq 20\%$   | 0.006  |
| 20 | [CoP] Versys Cementless Stem Trilogy                          | 342   | 1.07 | 0.51 | [-0.59 , 1.61] | Non-inferiority not shown | 0.363  |
| 21 | [MoP] ABG II Monolithic Cementless Stem ABG II Cementless Cup | 419   | 1.92 | 1.37 | [ 0.07 , 2.66] | Non-inferiority not shown | 0.039  |
| 22 | [MoP] ABG II Monolithic Cementless Stem Trident               | 402   | 4.11 | 3.56 | [ 1.71 , 5.41] | Inferior by $\geq 100\%$  | <0.001 |
| 23 | [MoP] Accolade Trident                                        | 6,100 | 2.76 | 2.21 | [ 1.72 , 2.70] | Inferior by $\geq 100\%$  | <0.001 |
| 24 | [MoP] Anthology R3 Cementless                                 | 353   | 2.14 | 1.59 | [ 0.69 , 2.48] | Inferior by $\geq 100\%$  | <0.001 |
| 25 | [MoP] Bimetric Cementless Stem Mallory-Head Cementless Cup    | 271   | 2.05 | 1.50 | [ 0.23 , 2.76] | Inferior by $\geq 20\%$   | 0.020  |
| 26 | [MoP] C-Stem AMT Cemented Stem Charnley and Elite Plus LPW    | 1,397 | 1.46 | 0.90 | [ 0.30 , 1.51] | Inferior by $\geq 20\%$   | 0.003  |
| 27 | [MoP] C-Stem AMT Cemented Stem Elite Plus Cemented Cup        | 435   | 1.22 | 0.66 | [-0.26 , 1.58] | Non-inferiority not shown | 0.157  |
| 28 | [MoP] C-Stem AMT Cemented Stem Elite Plus Ogee                | 918   | 1.01 | 0.46 | [-0.13 , 1.05] | Non-inferiority not shown | 0.130  |
| 29 | [MoP] C-Stem AMT Cemented Stem Marathon                       | 356   | 1.46 | 0.90 | [ 0.10 , 1.71] | Non-inferiority not shown | 0.028  |
| 30 | [MoP] C-Stem AMT Cemented Stem Pinnacle                       | 657   | 1.85 | 1.29 | [ 0.56 , 2.02] | Inferior by $\geq 100\%$  | 0.001  |
| 31 | [MoP] C-Stem Cemented Stem Charnley Ogee                      | 680   | 1.86 | 1.30 | [ 0.34 , 2.26] | Inferior by $\geq 20\%$   | 0.008  |
| 32 | [MoP] C-Stem Cemented Stem Charnley and Elite Plus LPW        | 1,435 | 1.57 | 1.02 | [ 0.31 , 1.72] | Inferior by $\geq 20\%$   | 0.005  |
| 33 | [MoP] C-Stem Cemented Stem Duraloc Cementless Cup             | 496   | 2.67 | 2.12 | [ 0.73 , 3.50] | Inferior by $\geq 100\%$  | 0.003  |
| 34 | [MoP] C-Stem Cemented Stem Elite Plus Cemented Cup            | 586   | 0.90 | 0.34 | [-0.46 , 1.15] | Non-inferiority not shown | 0.405  |
| 35 | [MoP] C-Stem Cemented Stem Elite Plus Ogee                    | 2,459 | 1.13 | 0.57 | [ 0.06 , 1.08] | Non-inferiority not shown | 0.028  |
| 36 | [MoP] C-Stem Cemented Stem Marathon                           | 744   | 1.25 | 0.70 | [ 0.08 , 1.32] | Non-inferiority not shown | 0.028  |
| 37 | [MoP] C-Stem Cemented Stem Opera                              | 1,013 | 1.44 | 0.89 | [ 0.16 , 1.62] | Inferior by $\geq 20\%$   | 0.017  |
| 38 | [MoP] C-Stem Cemented Stem Pinnacle                           | 331   | 1.56 | 1.01 | [-0.13 , 2.14] | Non-inferiority not shown | 0.083  |
| 39 | [MoP] C-Stem Cemented Stem Polarcup Cementless                | 255   | 0.71 | 0.16 | [-0.89 , 1.21] | Non-inferiority not shown | 0.768  |
| 40 | [MoP] C-Stem Cemented Stem Trilogy                            | 338   | 0.82 | 0.26 | [-0.73 , 1.25] | Non-inferiority not shown | 0.606  |
| 41 | [MoP] C-Stem Cemented Stem Wroblewski Golf Ball               | 756   | 1.50 | 0.94 | [ 0.10 , 1.79] | Non-inferiority not shown | 0.028  |
| 42 | [MoP] CCA Cemented Stem CCB Cup                               | 738   | 0.79 | 0.23 | [-0.38 , 0.85] | Non-inferiority not shown | 0.459  |
| 43 | [MoP] CLS Cementless Stem Allofit                             | 553   | 2.90 | 2.34 | [ 1.01 , 3.68] | Inferior by $\geq 100\%$  | 0.001  |
| 44 | [MoP] CLS Cementless Stem Trilogy                             | 419   | 3.18 | 2.63 | [ 1.17 , 4.09] | Inferior by $\geq 100\%$  | <0.001 |
| 45 | [MoP] CMK Modular Cemented Stem CMK Cemented Cup              | 418   | 1.08 | 0.52 | [-0.49 , 1.53] | Non-inferiority not shown | 0.310  |
| 46 | [MoP] CPCS Opera                                              | 866   | 1.28 | 0.72 | [-0.02 , 1.46] | Non-inferiority not shown | 0.056  |

|    |                                                            |        |      |       |                |                           |        |
|----|------------------------------------------------------------|--------|------|-------|----------------|---------------------------|--------|
| 1  | [MoP] CPCS Polarcup Cementless                             | 368    | 0.99 | 0.43  | [-0.60 , 1.46] | Non-inferiority not shown | 0.410  |
| 2  | [MoP] CPS Plus Cenator Cemented Cup                        | 339    | 0.80 | 0.25  | [-0.73 , 1.23] | Non-inferiority not shown | 0.618  |
| 3  | [MoP] CPS Plus EP-Fit Plus                                 | 282    | 3.23 | 2.68  | [ 0.67 , 4.69] | Inferior by $\geq 100\%$  | 0.009  |
| 4  | [MoP] CPS Plus Opera                                       | 464    | 2.16 | 1.61  | [ 0.29 , 2.92] | Inferior by $\geq 20\%$   | 0.017  |
| 5  | [MoP] CPT Allofit                                          | 430    | 0.94 | 0.39  | [-0.41 , 1.18] | Non-inferiority not shown | 0.339  |
| 6  | [MoP] CPT Elite Plus Ogee                                  | 1,744  | 1.87 | 1.32  | [ 0.67 , 1.97] | Inferior by $\geq 100\%$  | <0.001 |
| 7  | [MoP] CPT Exceed                                           | 263    | 4.10 | 3.55  | [ 1.24 , 5.85] | Inferior by $\geq 100\%$  | 0.003  |
| 8  | [MoP] CPT Opera                                            | 378    | 2.17 | 1.62  | [ 0.16 , 3.07] | Inferior by $\geq 20\%$   | 0.029  |
| 9  | [MoP] CPT Original ME Muller Low Profile Cup               | 422    | 2.20 | 1.64  | [ 0.54 , 2.75] | Inferior by $\geq 20\%$   | 0.004  |
| 10 | [MoP] CPT Pinnacle                                         | 639    | 2.42 | 1.86  | [ 0.72 , 3.00] | Inferior by $\geq 100\%$  | 0.001  |
| 11 | [MoP] CPT Trabecular Metal Modular Cementless Cup          | 523    | 2.41 | 1.85  | [ 0.82 , 2.89] | Inferior by $\geq 100\%$  | <0.001 |
| 12 | [MoP] CPT Trilogy                                          | 5,765  | 2.20 | 1.65  | [ 1.17 , 2.12] | Inferior by $\geq 100\%$  | <0.001 |
| 13 | [MoP] CPT ZCA                                              | 5,547  | 2.11 | 1.55  | [ 1.07 , 2.03] | Inferior by $\geq 100\%$  | <0.001 |
| 14 | [MoP] Centrament Chirulen                                  | 310    | 1.12 | 0.57  | [-0.59 , 1.72] | Non-inferiority not shown | 0.337  |
| 15 | [MoP] Charnley Cemented Stem Charnley Cemented Cup         | 3,601  | 1.72 | 1.17  | [ 0.63 , 1.71] | Inferior by $\geq 100\%$  | <0.001 |
| 16 | [MoP] Charnley Cemented Stem Charnley Ogee                 | 7,533  | 1.88 | 1.33  | [ 0.86 , 1.79] | Inferior by $\geq 100\%$  | <0.001 |
| 17 | [MoP] Charnley Cemented Stem Charnley and Elite Plus LPW   | 5,041  | 1.12 | 0.56  | [ 0.11 , 1.02] | Non-inferiority not shown | 0.015  |
| 18 | [MoP] Charnley Cemented Stem Opera                         | 1,039  | 1.46 | 0.91  | [ 0.14 , 1.67] | Inferior by $\geq 20\%$   | 0.020  |
| 19 | [MoP] Charnley Cemented Stem Wroblewski Golf Ball          | 797    | 1.74 | 1.18  | [ 0.30 , 2.06] | Inferior by $\geq 20\%$   | 0.008  |
| 20 | [MoP] Charnley Modular Charnley and Elite Plus LPW         | 277    | 0.27 | -0.28 | [-0.93 , 0.37] | Non-inferiority not shown | 0.393  |
| 21 | [MoP] Corail Charnley and Elite Plus LPW                   | 448    | 1.85 | 1.30  | [ 0.30 , 2.29] | Inferior by $\geq 20\%$   | 0.010  |
| 22 | [MoP] Corail Duraloc Cementless Cup                        | 3,226  | 2.27 | 1.71  | [ 1.10 , 2.33] | Inferior by $\geq 100\%$  | <0.001 |
| 23 | [MoP] Corail Elite Plus Cemented Cup                       | 727    | 1.31 | 0.75  | [-0.05 , 1.56] | Non-inferiority not shown | 0.067  |
| 24 | [MoP] Corail Elite Plus Ogee                               | 1,029  | 1.70 | 1.14  | [ 0.41 , 1.88] | Inferior by $\geq 20\%$   | 0.002  |
| 25 | [MoP] Corail Exeter Contemporary Flanged                   | 328    | 1.35 | 0.79  | [-0.14 , 1.72] | Non-inferiority not shown | 0.095  |
| 26 | [MoP] Corail Marathon                                      | 1,385  | 1.23 | 0.67  | [ 0.17 , 1.18] | Inferior by $\geq 20\%$   | 0.009  |
| 27 | [MoP] Corail Pinnacle                                      | 16,408 | 1.70 | 1.15  | [ 0.76 , 1.54] | Inferior by $\geq 100\%$  | <0.001 |
| 28 | [MoP] Corail Trilogy                                       | 1,383  | 1.72 | 1.17  | [ 0.47 , 1.87] | Inferior by $\geq 20\%$   | 0.001  |
| 29 | [MoP] Elite Plus Cemented Stem Charnley and Elite Plus LPW | 308    | 1.66 | 1.11  | [-0.26 , 2.47] | Non-inferiority not shown | 0.113  |
| 30 | [MoP] Elite Plus Cemented Stem Elite Plus Ogee             | 519    | 1.06 | 0.50  | [-0.42 , 1.42] | Non-inferiority not shown | 0.284  |
| 31 | [MoP] Exeter Elite Plus Ogee                               | 259    | 0.71 | 0.15  | [-0.89 , 1.20] | Non-inferiority not shown | 0.775  |
| 32 | [MoP] Exeter V40 ABG II Cementless Cup                     | 693    | 1.56 | 1.00  | [ 0.05 , 1.95] | Non-inferiority not shown | 0.038  |
| 33 | [MoP] Exeter V40 Cenator Cemented Cup                      | 1,725  | 1.99 | 1.44  | [ 0.75 , 2.12] | Inferior by $\geq 100\%$  | <0.001 |
| 34 | [MoP] Exeter V40 Charnley Cemented Cup                     | 286    | 0.87 | 0.32  | [-0.73 , 1.37] | Non-inferiority not shown | 0.553  |
| 35 | [MoP] Exeter V40 Charnley Ogee                             | 1,113  | 1.44 | 0.88  | [ 0.15 , 1.61] | Inferior by $\geq 20\%$   | 0.018  |
| 36 | [MoP] Exeter V40 Charnley and Elite Plus LPW               | 1,812  | 1.47 | 0.91  | [ 0.34 , 1.48] | Inferior by $\geq 20\%$   | 0.002  |
| 37 | [MoP] Exeter V40 Duraloc Cementless Cup                    | 1,000  | 2.04 | 1.48  | [ 0.56 , 2.40] | Inferior by $\geq 100\%$  | 0.002  |
| 38 | [MoP] Exeter V40 EP-Fit Plus                               | 496    | 2.56 | 2.01  | [ 0.63 , 3.38] | Inferior by $\geq 100\%$  | 0.004  |
| 39 | [MoP] Exeter V40 Elite Plus Cemented Cup                   | 2,674  | 0.76 | 0.21  | [-0.25 , 0.66] | Non-inferiority not shown | 0.376  |
| 40 | [MoP] Exeter V40 Elite Plus Ogee                           | 12,458 | 1.11 | 0.56  | [ 0.16 , 0.96] | Inferior by $\geq 20\%$   | 0.006  |
| 41 | [MoP] Exeter V40 Exceed                                    | 375    | 0.94 | 0.39  | [-0.51 , 1.29] | Non-inferiority not shown | 0.399  |
| 42 | [MoP] Exeter V40 Exceed ABT                                | 305    | 1.17 | 0.62  | [-0.43 , 1.67] | Non-inferiority not shown | 0.251  |
| 43 | [MoP] Exeter V40 Exeter Contemporary Flanged               | 26,691 | 1.21 | 0.65  | [ 0.27 , 1.03] | Inferior by $\geq 20\%$   | 0.001  |
| 44 | [MoP] Exeter V40 Exeter Contemporary Hooded                | 11,227 | 2.10 | 1.54  | [ 1.12 , 1.96] | Inferior by $\geq 100\%$  | <0.001 |
| 45 | [MoP] Exeter V40 Exeter Duration                           | 10,271 | 1.70 | 1.15  | [ 0.72 , 1.57] | Inferior by $\geq 100\%$  | <0.001 |
| 46 | [MoP] Exeter V40 Exeter X3 Rimfit                          | 859    | 1.16 | 0.61  | [ 0.14 , 1.07] | Inferior by $\geq 20\%$   | 0.010  |

|    |                                                               |        |      |      |                |                           |        |
|----|---------------------------------------------------------------|--------|------|------|----------------|---------------------------|--------|
| 1  | [MoP] Exeter V40 Marathon                                     | 555    | 1.54 | 0.99 | [ 0.24 , 1.73] | Inferior by $\geq 20\%$   | 0.010  |
| 2  | [MoP] Exeter V40 Opera                                        | 1,734  | 1.18 | 0.63 | [ 0.06 , 1.19] | Non-inferiority not shown | 0.030  |
| 3  | [MoP] Exeter V40 Pinnacle                                     | 1,546  | 1.60 | 1.05 | [ 0.48 , 1.62] | Inferior by $\geq 20\%$   | <0.001 |
| 4  | [MoP] Exeter V40 Reflection Cementless                        | 1,812  | 1.58 | 1.02 | [ 0.37 , 1.67] | Inferior by $\geq 20\%$   | 0.002  |
| 5  | [MoP] Exeter V40 Trabecular Metal Modular Cementless Cup      | 276    | 2.23 | 1.68 | [ 0.19 , 3.17] | Inferior by $\geq 20\%$   | 0.028  |
| 6  | [MoP] Exeter V40 Trabecular Metal Natural Cup                 | 284    | 4.06 | 3.51 | [ 1.39 , 5.63] | Inferior by $\geq 100\%$  | 0.001  |
| 7  | [MoP] Exeter V40 Trident                                      | 10,507 | 1.44 | 0.88 | [ 0.48 , 1.29] | Inferior by $\geq 20\%$   | <0.001 |
| 8  | [MoP] Exeter V40 Trilogy                                      | 6,611  | 1.33 | 0.77 | [ 0.34 , 1.21] | Inferior by $\geq 20\%$   | 0.001  |
| 9  | [MoP] Exeter V40 Ultima Cemented Cup                          | 1,040  | 2.19 | 1.64 | [ 0.73 , 2.55] | Inferior by $\geq 100\%$  | <0.001 |
| 10 | [MoP] Furlong Cemented Stem JRI Cemented Cup                  | 1,287  | 1.66 | 1.11 | [ 0.37 , 1.84] | Inferior by $\geq 20\%$   | 0.003  |
| 11 | [MoP] Furlong HAC Stem CSF                                    | 5,416  | 2.43 | 1.87 | [ 1.36 , 2.38] | Inferior by $\geq 100\%$  | <0.001 |
| 12 | [MoP] Furlong HAC Stem Furlong HAC CSF Plus                   | 1,808  | 2.91 | 2.35 | [ 1.70 , 3.01] | Inferior by $\geq 100\%$  | <0.001 |
| 13 | [MoP] Furlong HAC Stem Furlong Threaded                       | 416    | 3.01 | 2.46 | [ 0.91 , 4.00] | Inferior by $\geq 100\%$  | 0.002  |
| 14 | [MoP] Furlong HAC Stem Trilogy                                | 264    | 1.90 | 1.35 | [-0.10 , 2.80] | Non-inferiority not shown | 0.067  |
| 15 | [MoP] M/L Taper Cementless Allofit                            | 295    | 2.04 | 1.48 | [ 0.22 , 2.74] | Inferior by $\geq 20\%$   | 0.021  |
| 16 | [MoP] M/L Taper Cementless Trilogy                            | 328    | 2.54 | 1.98 | [ 0.73 , 3.23] | Inferior by $\geq 100\%$  | 0.002  |
| 17 | [MoP] MS-30 Allofit                                           | 269    | 0.57 | 0.01 | [-0.85 , 0.87] | Non-inferiority not shown | 0.981  |
| 18 | [MoP] MS-30 Original ME Muller Low Profile Cup                | 531    | 1.23 | 0.67 | [-0.19 , 1.54] | Non-inferiority not shown | 0.128  |
| 19 | [MoP] Mem Original ME Muller Low Profile Cup                  | 313    | 0.86 | 0.30 | [-0.73 , 1.34] | Non-inferiority not shown | 0.567  |
| 20 | [MoP] Muller Straight Stem Centerpulse Muller                 | 442    | 1.79 | 1.24 | [ 0.02 , 2.46] | Non-inferiority not shown | 0.047  |
| 21 | [MoP] Muller Straight Stem Original ME Muller Low Profile Cup | 1,008  | 1.12 | 0.56 | [-0.07 , 1.19] | Non-inferiority not shown | 0.080  |
| 22 | [MoP] Muller-Biomet Apollo                                    | 1,539  | 1.41 | 0.86 | [ 0.23 , 1.49] | Inferior by $\geq 20\%$   | 0.008  |
| 23 | [MoP] Muller-Biomet Original ME Muller Low Profile Cup        | 512    | 1.96 | 1.41 | [ 0.41 , 2.40] | Inferior by $\geq 20\%$   | 0.006  |
| 24 | [MoP] Omnifit Cemented Stem ODC                               | 801    | 1.98 | 1.43 | [ 0.45 , 2.41] | Inferior by $\geq 20\%$   | 0.004  |
| 25 | [MoP] Omnifit Cemented Stem Trident                           | 250    | 1.89 | 1.34 | [-0.35 , 3.02] | Non-inferiority not shown | 0.120  |
| 26 | [MoP] Omnifit Cementless Stem Secure Fit Cementless Cup       | 275    | 0.69 | 0.14 | [-0.89 , 1.16] | Non-inferiority not shown | 0.791  |
| 27 | [MoP] Omnifit Cementless Stem Trident                         | 385    | 5.46 | 4.90 | [ 2.78 , 7.02] | Inferior by $\geq 100\%$  | <0.001 |
| 28 | [MoP] P10 Muller Original ME Muller Low Profile Cup           | 293    | 0.96 | 0.41 | [-0.52 , 1.34] | Non-inferiority not shown | 0.388  |
| 29 | [MoP] SL-Plus Cementless Stem EP-Fit Plus                     | 1,651  | 3.51 | 2.96 | [ 2.12 , 3.80] | Inferior by $\geq 100\%$  | <0.001 |
| 30 | [MoP] SP II Cemented Stem Interplanta                         | 552    | 3.23 | 2.67 | [ 1.29 , 4.05] | Inferior by $\geq 100\%$  | <0.001 |
| 31 | [MoP] Spectron Reflection Cementless                          | 267    | 1.24 | 0.68 | [-0.58 , 1.94] | Non-inferiority not shown | 0.289  |
| 32 | [MoP] Stanmore Modular Stem Elite Plus Cemented Cup           | 406    | 0.98 | 0.42 | [-0.51 , 1.36] | Non-inferiority not shown | 0.375  |
| 33 | [MoP] Stanmore Modular Stem SHP Cup                           | 677    | 0.95 | 0.40 | [-0.30 , 1.10] | Non-inferiority not shown | 0.265  |
| 34 | [MoP] Stanmore Modular Stem Stanmore-Arcom Cup                | 2,920  | 1.62 | 1.06 | [ 0.52 , 1.60] | Inferior by $\geq 20\%$   | <0.001 |
| 35 | [MoP] Synergy Cementless Stem Reflection Cementless           | 1,370  | 1.43 | 0.87 | [ 0.16 , 1.59] | Inferior by $\geq 20\%$   | 0.016  |
| 36 | [MoP] Taperfit Cemented Stem Atlas IIIp                       | 250    | 2.18 | 1.63 | [ 0.20 , 3.06] | Inferior by $\geq 20\%$   | 0.026  |
| 37 | [MoP] Taperloc Cementless Stem Exceed                         | 470    | 1.57 | 1.01 | [-0.07 , 2.10] | Non-inferiority not shown | 0.066  |
| 38 | [MoP] Taperloc Cementless Stem Exceed ABT                     | 1,793  | 2.07 | 1.52 | [ 0.98 , 2.06] | Inferior by $\geq 100\%$  | <0.001 |
| 39 | [MoP] Versys Cementless Stem Trilogy                          | 797    | 4.81 | 4.26 | [ 2.82 , 5.69] | Inferior by $\geq 100\%$  | <0.001 |

**Supplementary table 1c: Difference in Kaplan-Meier failure estimate between a contemporary reference and implants with at least 250 at risk at 7 years since primary**

| Stem/cup brand                                                | Number at risk | Cumulative failure (%) | Difference in failure (%) | 95% CI         | Equivalence status        | p-value |
|---------------------------------------------------------------|----------------|------------------------|---------------------------|----------------|---------------------------|---------|
| [MoP] Exeter V40 Elite Plus Cemented Cup                      | 1,773          | 0.91                   | [REFERENCE]               |                |                           |         |
| [CoC] ABG II Monolithic Cementless Stem ABG II Cementless Cup | 909            | 3.09                   | 2.19                      | [ 1.10 , 3.27] | Inferior by $\geq 100\%$  | <0.001  |
| [CoC] ABG II Monolithic Cementless Stem Trident               | 705            | 3.68                   | 2.77                      | [ 1.55 , 4.00] | Inferior by $\geq 100\%$  | <0.001  |
| [CoC] Accolade Trident                                        | 2,978          | 3.31                   | 2.40                      | [ 1.86 , 2.95] | Inferior by $\geq 100\%$  | <0.001  |
| [CoC] C-Stem Cemented Stem Pinnacle                           | 286            | 1.44                   | 0.53                      | [-0.76 , 1.82] | Non-inferiority not shown | 0.420   |
| [CoC] CPT Trilogy AB                                          | 265            | 1.93                   | 1.03                      | [-0.20 , 2.26] | Non-inferiority not shown | 0.101   |
| [CoC] Corail Duraloc Option                                   | 819            | 3.61                   | 2.71                      | [ 1.54 , 3.88] | Inferior by $\geq 100\%$  | <0.001  |
| [CoC] Corail Pinnacle                                         | 7,589          | 2.93                   | 2.03                      | [ 1.65 , 2.40] | Inferior by $\geq 100\%$  | <0.001  |
| [CoC] Exeter V40 ABG II Cementless Cup                        | 918            | 1.69                   | 0.79                      | [ 0.01 , 1.57] | Non-inferiority not shown | 0.048   |
| [CoC] Exeter V40 Trident                                      | 5,732          | 1.99                   | 1.09                      | [ 0.67 , 1.51] | Inferior by $\geq 20\%$   | <0.001  |
| [CoC] Furlong HAC Stem CSF                                    | 1,405          | 3.19                   | 2.29                      | [ 1.37 , 3.21] | Inferior by $\geq 100\%$  | <0.001  |
| [CoC] Furlong HAC Stem Furlong HAC CSF Plus                   | 2,083          | 2.15                   | 1.25                      | [ 0.81 , 1.69] | Inferior by $\geq 20\%$   | <0.001  |
| [CoC] Furlong HAC Stem Furlong Threaded                       | 308            | 4.24                   | 3.34                      | [ 1.14 , 5.53] | Inferior by $\geq 100\%$  | 0.003   |
| [CoC] Omnifit Cementless Stem Trident                         | 313            | 4.21                   | 3.31                      | [ 1.41 , 5.21] | Inferior by $\geq 100\%$  | 0.001   |
| [CoC] SL-Plus Cementless Stem EP-Fit Plus                     | 968            | 5.32                   | 4.41                      | [ 3.12 , 5.70] | Inferior by $\geq 100\%$  | <0.001  |
| [CoC] Summit Cementless Stem Pinnacle                         | 301            | 1.60                   | 0.69                      | [-0.37 , 1.76] | Non-inferiority not shown | 0.203   |
| [CoC] Taperloc Cementless Stem Exceed ABT                     | 1,609          | 2.02                   | 1.12                      | [ 0.65 , 1.58] | Inferior by $\geq 20\%$   | <0.001  |
| [CoP] Accolade Trident                                        | 544            | 2.20                   | 1.29                      | [ 0.64 , 1.95] | Inferior by $\geq 20\%$   | <0.001  |
| [CoP] C-Stem Cemented Stem Elite Plus Ogee                    | 342            | 0.75                   | -0.15                     | [-0.89 , 0.58] | Non-inferiority not shown | 0.684   |
| [CoP] C-Stem Cemented Stem Opera                              | 478            | 1.69                   | 0.79                      | [-0.22 , 1.80] | Non-inferiority not shown | 0.127   |
| [CoP] C-Stem Cemented Stem Wroblewski Golf Ball               | 598            | 1.67                   | 0.76                      | [-0.18 , 1.70] | Non-inferiority not shown | 0.112   |
| [CoP] Corail Charnley and Elite Plus LPW                      | 335            | 2.49                   | 1.59                      | [ 0.32 , 2.85] | Inferior by $\geq 20\%$   | 0.014   |
| [CoP] Corail Duraloc Cementless Cup                           | 266            | 5.06                   | 4.15                      | [ 1.72 , 6.59] | Inferior by $\geq 100\%$  | 0.001   |
| [CoP] Corail Pinnacle                                         | 1,638          | 2.16                   | 1.25                      | [ 0.78 , 1.73] | Inferior by $\geq 20\%$   | <0.001  |
| [CoP] Corail Trilogy                                          | 477            | 1.61                   | 0.71                      | [-0.29 , 1.71] | Non-inferiority not shown | 0.164   |
| [CoP] Exeter V40 Charnley and Elite Plus LPW                  | 250            | 2.02                   | 1.12                      | [ 0.05 , 2.19] | Non-inferiority not shown | 0.040   |
| [CoP] Exeter V40 Elite Plus Ogee                              | 535            | 1.35                   | 0.44                      | [-0.29 , 1.18] | Non-inferiority not shown | 0.240   |
| [CoP] Exeter V40 Exeter Contemporary Flanged                  | 1,110          | 1.42                   | 0.52                      | [ 0.00 , 1.03] | Non-inferiority not shown | 0.048   |
| [CoP] Exeter V40 Exeter Contemporary Hooded                   | 410            | 3.14                   | 2.23                      | [ 0.98 , 3.48] | Inferior by $\geq 100\%$  | <0.001  |
| [CoP] Exeter V40 Exeter Duration                              | 500            | 2.11                   | 1.21                      | [ 0.08 , 2.33] | Non-inferiority not shown | 0.035   |
| [CoP] Exeter V40 Trident                                      | 1,113          | 1.46                   | 0.56                      | [ 0.07 , 1.05] | Non-inferiority not shown | 0.026   |
| [CoP] Exeter V40 Trilogy                                      | 1,159          | 1.58                   | 0.67                      | [ 0.04 , 1.30] | Non-inferiority not shown | 0.037   |
| [CoP] Furlong HAC Stem CSF                                    | 4,459          | 2.07                   | 1.16                      | [ 0.69 , 1.64] | Inferior by $\geq 20\%$   | <0.001  |
| [CoP] Furlong HAC Stem Furlong HAC CSF Plus                   | 345            | 2.46                   | 1.55                      | [ 0.69 , 2.41] | Inferior by $\geq 20\%$   | <0.001  |
| [CoP] Furlong HAC Stem Furlong Threaded                       | 327            | 1.84                   | 0.94                      | [-0.45 , 2.33] | Non-inferiority not shown | 0.187   |
| [CoP] MS-30 Original ME Muller Low Profile Cup                | 675            | 0.70                   | -0.21                     | [-0.77 , 0.35] | Non-inferiority not shown | 0.460   |
| [CoP] SL-Plus Cementless Stem Bicon-Plus                      | 406            | 4.66                   | 3.75                      | [ 2.06 , 5.45] | Inferior by $\geq 100\%$  | <0.001  |
| [CoP] SL-Plus Cementless Stem EP-Fit Plus                     | 579            | 4.10                   | 3.20                      | [ 1.87 , 4.53] | Inferior by $\geq 100\%$  | <0.001  |
| [CoP] Versys Cementless Stem Trilogy                          | 303            | 1.36                   | 0.46                      | [-0.77 , 1.69] | Non-inferiority not shown | 0.465   |
| [MoP] ABG II Monolithic Cementless Stem ABG II Cementless Cup | 376            | 2.40                   | 1.50                      | [ 0.06 , 2.94] | Non-inferiority not shown | 0.041   |

|    |                                                            |       |      |       |                |                           |        |
|----|------------------------------------------------------------|-------|------|-------|----------------|---------------------------|--------|
| 1  | [MoP] ABG II Monolithic Cementless Stem Trident            | 301   | 5.72 | 4.81  | [ 2.60 , 7.02] | Inferior by $\geq 100\%$  | <0.001 |
| 2  | [MoP] Accolade Trident                                     | 2,764 | 3.50 | 2.59  | [ 2.07 , 3.11] | Inferior by $\geq 100\%$  | <0.001 |
| 3  | [MoP] C-Stem AMT Cemented Stem Charnley and Elite Plus LPW | 782   | 1.81 | 0.91  | [ 0.21 , 1.61] | Inferior by $\geq 20\%$   | 0.011  |
| 4  | [MoP] C-Stem AMT Cemented Stem Elite Plus Ogee             | 523   | 1.71 | 0.81  | [-0.02 , 1.64] | Non-inferiority not shown | 0.057  |
| 5  | [MoP] C-Stem AMT Cemented Stem Pinnacle                    | 298   | 2.08 | 1.18  | [ 0.34 , 2.02] | Inferior by $\geq 20\%$   | 0.006  |
| 6  | [MoP] C-Stem Cemented Stem Charnley Ogee                   | 539   | 2.03 | 1.12  | [ 0.12 , 2.12] | Non-inferiority not shown | 0.028  |
| 7  | [MoP] C-Stem Cemented Stem Charnley and Elite Plus LPW     | 1,298 | 1.94 | 1.04  | [ 0.29 , 1.79] | Inferior by $\geq 20\%$   | 0.007  |
| 8  | [MoP] C-Stem Cemented Stem Duraloc Cementless Cup          | 391   | 3.73 | 2.83  | [ 1.18 , 4.47] | Inferior by $\geq 100\%$  | 0.001  |
| 9  | [MoP] C-Stem Cemented Stem Elite Plus Cemented Cup         | 472   | 1.62 | 0.71  | [-0.34 , 1.76] | Non-inferiority not shown | 0.184  |
| 10 | [MoP] C-Stem Cemented Stem Elite Plus Ogee                 | 1,851 | 1.55 | 0.65  | [ 0.10 , 1.19] | Non-inferiority not shown | 0.020  |
| 11 | [MoP] C-Stem Cemented Stem Opera                           | 744   | 2.01 | 1.10  | [ 0.24 , 1.96] | Inferior by $\geq 20\%$   | 0.012  |
| 12 | [MoP] C-Stem Cemented Stem Pinnacle                        | 258   | 1.94 | 1.04  | [-0.30 , 2.38] | Non-inferiority not shown | 0.130  |
| 13 | [MoP] C-Stem Cemented Stem Trilogy                         | 278   | 1.11 | 0.21  | [-0.92 , 1.34] | Non-inferiority not shown | 0.719  |
| 14 | [MoP] C-Stem Cemented Stem Wroblewski Golf Ball            | 502   | 1.88 | 0.97  | [ 0.00 , 1.94] | Non-inferiority not shown | 0.050  |
| 15 | [MoP] CCA Cemented Stem CCB Cup                            | 328   | 1.69 | 0.78  | [-0.20 , 1.77] | Non-inferiority not shown | 0.119  |
| 16 | [MoP] CLS Cementless Stem Allofit                          | 350   | 3.77 | 2.87  | [ 1.30 , 4.44] | Inferior by $\geq 100\%$  | <0.001 |
| 17 | [MoP] CMK Modular Cemented Stem CMK Cemented Cup           | 329   | 1.08 | 0.17  | [-0.82 , 1.16] | Non-inferiority not shown | 0.734  |
| 18 | [MoP] CPCS Opera                                           | 324   | 2.86 | 1.95  | [ 0.78 , 3.12] | Inferior by $\geq 20\%$   | 0.001  |
| 19 | [MoP] CPS Plus Cenator Cemented Cup                        | 250   | 0.80 | -0.10 | [-1.06 , 0.86] | Non-inferiority not shown | 0.836  |
| 20 | [MoP] CPS Plus Opera                                       | 421   | 3.49 | 2.58  | [ 0.92 , 4.25] | Inferior by $\geq 100\%$  | 0.002  |
| 21 | [MoP] CPT Elite Plus Ogee                                  | 1,177 | 2.37 | 1.47  | [ 0.75 , 2.19] | Inferior by $\geq 20\%$   | <0.001 |
| 22 | [MoP] CPT Opera                                            | 276   | 3.01 | 2.11  | [ 0.39 , 3.82] | Inferior by $\geq 20\%$   | 0.016  |
| 23 | [MoP] CPT Trabecular Metal Modular Cementless Cup          | 270   | 3.00 | 2.09  | [ 0.78 , 3.40] | Inferior by $\geq 20\%$   | 0.002  |
| 24 | [MoP] CPT Trilogy                                          | 3,606 | 2.69 | 1.78  | [ 1.31 , 2.26] | Inferior by $\geq 100\%$  | <0.001 |
| 25 | [MoP] CPT ZCA                                              | 3,619 | 2.69 | 1.78  | [ 1.30 , 2.27] | Inferior by $\geq 100\%$  | <0.001 |
| 26 | [MoP] Centrament Chirulen                                  | 257   | 1.12 | 0.22  | [-0.93 , 1.36] | Non-inferiority not shown | 0.710  |
| 27 | [MoP] Charnley Cemented Stem Charnley Cemented Cup         | 3,004 | 2.31 | 1.41  | [ 0.84 , 1.97] | Inferior by $\geq 20\%$   | <0.001 |
| 28 | [MoP] Charnley Cemented Stem Charnley Ogee                 | 5,956 | 2.49 | 1.58  | [ 1.13 , 2.04] | Inferior by $\geq 100\%$  | <0.001 |
| 29 | [MoP] Charnley Cemented Stem Charnley and Elite Plus LPW   | 4,036 | 1.51 | 0.60  | [ 0.15 , 1.05] | Non-inferiority not shown | 0.009  |
| 30 | [MoP] Charnley Cemented Stem Opera                         | 733   | 2.08 | 1.18  | [ 0.29 , 2.07] | Inferior by $\geq 20\%$   | 0.009  |
| 31 | [MoP] Charnley Cemented Stem Wroblewski Golf Ball          | 659   | 1.87 | 0.96  | [ 0.07 , 1.86] | Non-inferiority not shown | 0.035  |
| 32 | [MoP] Corail Duraloc Cementless Cup                        | 2,661 | 3.39 | 2.48  | [ 1.79 , 3.18] | Inferior by $\geq 100\%$  | <0.001 |
| 33 | [MoP] Corail Elite Plus Cemented Cup                       | 467   | 1.82 | 0.91  | [-0.06 , 1.88] | Non-inferiority not shown | 0.065  |
| 34 | [MoP] Corail Elite Plus Ogee                               | 696   | 1.83 | 0.92  | [ 0.17 , 1.68] | Non-inferiority not shown | 0.016  |
| 35 | [MoP] Corail Marathon                                      | 354   | 1.49 | 0.59  | [ 0.03 , 1.15] | Non-inferiority not shown | 0.038  |
| 36 | [MoP] Corail Pinnacle                                      | 7,798 | 2.17 | 1.26  | [ 0.90 , 1.63] | Inferior by $\geq 20\%$   | <0.001 |
| 37 | [MoP] Corail Trilogy                                       | 855   | 2.65 | 1.75  | [ 0.86 , 2.63] | Inferior by $\geq 20\%$   | <0.001 |
| 38 | [MoP] Elite Plus Cemented Stem Charnley and Elite Plus LPW | 281   | 2.00 | 1.10  | [-0.41 , 2.60] | Non-inferiority not shown | 0.154  |
| 39 | [MoP] Elite Plus Cemented Stem Elite Plus Ogee             | 465   | 1.26 | 0.35  | [-0.63 , 1.33] | Non-inferiority not shown | 0.480  |
| 40 | [MoP] Exeter V40 ABG II Cementless Cup                     | 626   | 2.02 | 1.11  | [ 0.05 , 2.18] | Non-inferiority not shown | 0.040  |
| 41 | [MoP] Exeter V40 Cenator Cemented Cup                      | 1,274 | 2.26 | 1.36  | [ 0.65 , 2.07] | Inferior by $\geq 20\%$   | <0.001 |
| 42 | [MoP] Exeter V40 Charnley Ogee                             | 901   | 1.62 | 0.71  | [-0.03 , 1.46] | Non-inferiority not shown | 0.061  |
| 43 | [MoP] Exeter V40 Charnley and Elite Plus LPW               | 1,082 | 1.81 | 0.91  | [ 0.29 , 1.53] | Inferior by $\geq 20\%$   | 0.004  |
| 44 | [MoP] Exeter V40 Duraloc Cementless Cup                    | 754   | 2.24 | 1.33  | [ 0.39 , 2.27] | Inferior by $\geq 20\%$   | 0.005  |
| 45 | [MoP] Exeter V40 EP-Fit Plus                               | 424   | 3.64 | 2.74  | [ 1.09 , 4.38] | Inferior by $\geq 100\%$  | 0.001  |
| 46 | [MoP] Exeter V40 Elite Plus Ogee                           | 8,638 | 1.50 | 0.59  | [ 0.22 , 0.96] | Inferior by $\geq 20\%$   | 0.002  |



|    |                                                               |        |      |       |                |                           |        |
|----|---------------------------------------------------------------|--------|------|-------|----------------|---------------------------|--------|
| 1  | [MoP] Exeter V40 Exceed                                       | 265    | 0.94 | 0.04  | [-0.84 , 0.92] | Non-inferiority not shown | 0.934  |
| 2  | [MoP] Exeter V40 Exeter Contemporary Flanged                  | 16,415 | 1.58 | 0.67  | [ 0.33 , 1.01] | Inferior by $\geq 20\%$   | <0.001 |
| 3  | [MoP] Exeter V40 Exeter Contemporary Hooded                   | 7,073  | 2.79 | 1.89  | [ 1.47 , 2.30] | Inferior by $\geq 100\%$  | <0.001 |
| 4  | [MoP] Exeter V40 Exeter Duration                              | 7,252  | 2.45 | 1.55  | [ 1.13 , 1.97] | Inferior by $\geq 100\%$  | <0.001 |
| 5  | [MoP] Exeter V40 Opera                                        | 1,144  | 1.59 | 0.68  | [ 0.06 , 1.31] | Non-inferiority not shown | 0.032  |
| 6  | [MoP] Exeter V40 Pinnacle                                     | 718    | 1.89 | 0.98  | [ 0.35 , 1.61] | Inferior by $\geq 20\%$   | 0.002  |
| 7  | [MoP] Exeter V40 Reflection Cementless                        | 1,359  | 2.31 | 1.41  | [ 0.66 , 2.15] | Inferior by $\geq 20\%$   | <0.001 |
| 8  | [MoP] Exeter V40 Trident                                      | 5,685  | 1.85 | 0.95  | [ 0.57 , 1.33] | Inferior by $\geq 20\%$   | <0.001 |
| 9  | [MoP] Exeter V40 Trilogy                                      | 4,380  | 1.67 | 0.77  | [ 0.34 , 1.19] | Inferior by $\geq 20\%$   | <0.001 |
| 10 | [MoP] Exeter V40 Ultima Cemented Cup                          | 916    | 2.29 | 1.38  | [ 0.47 , 2.29] | Inferior by $\geq 20\%$   | 0.003  |
| 11 | [MoP] Furlong Cemented Stem JRI Cemented Cup                  | 1,041  | 1.99 | 1.09  | [ 0.31 , 1.86] | Inferior by $\geq 20\%$   | 0.006  |
| 12 | [MoP] Furlong HAC Stem CSF                                    | 4,138  | 3.06 | 2.15  | [ 1.63 , 2.67] | Inferior by $\geq 100\%$  | <0.001 |
| 13 | [MoP] Furlong HAC Stem Furlong HAC CSF Plus                   | 731    | 3.34 | 2.44  | [ 1.72 , 3.16] | Inferior by $\geq 100\%$  | <0.001 |
| 14 | [MoP] Furlong HAC Stem Furlong Threaded                       | 348    | 3.27 | 2.37  | [ 0.75 , 3.98] | Inferior by $\geq 20\%$   | 0.004  |
| 15 | [MoP] MS-30 Original ME Muller Low Profile Cup                | 334    | 1.74 | 0.83  | [-0.27 , 1.93] | Non-inferiority not shown | 0.139  |
| 16 | [MoP] Mem Original ME Muller Low Profile Cup                  | 286    | 0.86 | -0.05 | [-1.06 , 0.97] | Non-inferiority not shown | 0.926  |
| 17 | [MoP] Muller Straight Stem Centerpulse Muller                 | 316    | 3.15 | 2.24  | [ 0.56 , 3.92] | Inferior by $\geq 20\%$   | 0.009  |
| 18 | [MoP] Muller Straight Stem Original ME Muller Low Profile Cup | 646    | 2.06 | 1.16  | [ 0.27 , 2.04] | Inferior by $\geq 20\%$   | 0.010  |
| 19 | [MoP] Muller-Biomet Apollo                                    | 1,089  | 1.70 | 0.80  | [ 0.13 , 1.46] | Non-inferiority not shown | 0.019  |
| 20 | [MoP] Muller-Biomet Original ME Muller Low Profile Cup        | 267    | 2.22 | 1.32  | [ 0.21 , 2.42] | Inferior by $\geq 20\%$   | 0.019  |
| 21 | [MoP] Omnifit Cemented Stem ODC                               | 708    | 2.78 | 1.88  | [ 0.73 , 3.03] | Inferior by $\geq 20\%$   | 0.001  |
| 22 | [MoP] Omnifit Cementless Stem Secure Fit Cementless Cup       | 255    | 1.42 | 0.52  | [-0.90 , 1.93] | Non-inferiority not shown | 0.476  |
| 23 | [MoP] Omnifit Cementless Stem Trident                         | 321    | 6.51 | 5.61  | [ 3.28 , 7.94] | Inferior by $\geq 100\%$  | <0.001 |
| 24 | [MoP] SL-Plus Cementless Stem EP-Fit Plus                     | 1,230  | 4.42 | 3.52  | [ 2.58 , 4.46] | Inferior by $\geq 100\%$  | <0.001 |
| 25 | [MoP] SP II Cemented Stem Interplanta                         | 455    | 4.00 | 3.09  | [ 1.54 , 4.65] | Inferior by $\geq 100\%$  | <0.001 |
| 26 | [MoP] Stanmore Modular Stem SHP Cup                           | 480    | 1.46 | 0.55  | [-0.33 , 1.44] | Non-inferiority not shown | 0.222  |
| 27 | [MoP] Stanmore Modular Stem Stanmore-Arcom Cup                | 1,908  | 1.97 | 1.06  | [ 0.51 , 1.61] | Inferior by $\geq 20\%$   | <0.001 |
| 28 | [MoP] Synergy Cementless Stem Reflection Cementless           | 1,002  | 1.75 | 0.85  | [ 0.10 , 1.60] | Non-inferiority not shown | 0.027  |
| 29 | [MoP] Taperloc Cementless Stem Exceed                         | 370    | 2.27 | 1.37  | [ 0.04 , 2.69] | Non-inferiority not shown | 0.043  |
| 30 | [MoP] Taperloc Cementless Stem Exceed ABT                     | 513    | 2.52 | 1.61  | [ 0.96 , 2.26] | Inferior by $\geq 100\%$  | <0.001 |
| 31 | [MoP] Versys Cementless Stem Trilogy                          | 714    | 4.81 | 3.91  | [ 2.48 , 5.33] | Inferior by $\geq 100\%$  | <0.001 |

Supplementary table 1d: Difference in Kaplan-Meier failure estimate between a contemporary reference and implants with at least 250 at risk at 10 years since primary

| Stem/cup brand                                                | Number at risk | Cumulative failure (%) | Difference in failure (%) | 95% CI          | Equivalence status        | p-value |
|---------------------------------------------------------------|----------------|------------------------|---------------------------|-----------------|---------------------------|---------|
| [MoP] Exeter V40 Elite Plus Ogee                              | 3,580          | 2.14                   | [REFERENCE]               |                 |                           |         |
| [CoC] ABG II Monolithic Cementless Stem ABG II Cementless Cup | 695            | 4.42                   | 2.28                      | [ 0.96 , 3.60]  | Inferior by $\geq 20\%$   | 0.001   |
| [CoC] ABG II Monolithic Cementless Stem Trident               | 412            | 4.15                   | 2.01                      | [ 0.68 , 3.34]  | Inferior by $\geq 20\%$   | 0.003   |
| [CoC] Accolade Trident                                        | 454            | 4.38                   | 2.24                      | [ 1.48 , 3.00]  | Inferior by $\geq 20\%$   | <0.001  |
| [CoC] Corail Duraloc Option                                   | 383            | 4.45                   | 2.31                      | [ 0.93 , 3.68]  | Inferior by $\geq 20\%$   | 0.001   |
| [CoC] Corail Pinnacle                                         | 886            | 3.90                   | 1.76                      | [ 1.23 , 2.29]  | Inferior by $\geq 20\%$   | <0.001  |
| [CoC] Exeter V40 ABG II Cementless Cup                        | 440            | 2.66                   | 0.52                      | [-0.54 , 1.58]  | Non-inferiority not shown | 0.334   |
| [CoC] Exeter V40 Trident                                      | 1,846          | 2.59                   | 0.44                      | [-0.04 , 0.93]  | Non-inferiority not shown | 0.072   |
| [CoC] Furlong HAC Stem CSF                                    | 829            | 4.37                   | 2.22                      | [ 1.13 , 3.32]  | Inferior by $\geq 20\%$   | <0.001  |
| [CoC] SL-Plus Cementless Stem EP-Fit Plus                     | 288            | 6.94                   | 4.80                      | [ 3.25 , 6.35]  | Inferior by $\geq 100\%$  | <0.001  |
| [CoP] C-Stem Cemented Stem Wroblewski Golf Ball               | 317            | 2.51                   | 0.36                      | [-0.88 , 1.61]  | Non-inferiority not shown | 0.567   |
| [CoP] Exeter V40 Exeter Contemporary Flanged                  | 269            | 2.10                   | -0.05                     | [-0.90 , 0.80]  | Non-inferiority not shown | 0.913   |
| [CoP] Exeter V40 Trilogy                                      | 494            | 1.91                   | -0.23                     | [-0.96 , 0.50]  | Non-inferiority not shown | 0.537   |
| [CoP] Furlong HAC Stem CSF                                    | 2,520          | 2.65                   | 0.51                      | [-0.02 , 1.03]  | Non-inferiority not shown | 0.058   |
| [MoP] ABG II Monolithic Cementless Stem ABG II Cementless Cup | 278            | 4.37                   | 2.22                      | [ 0.21 , 4.24]  | Non-inferiority not shown | 0.031   |
| [MoP] C-Stem Cemented Stem Charnley Ogee                      | 293            | 2.25                   | 0.11                      | [-0.97 , 1.19]  | Non-inferiority not shown | 0.846   |
| [MoP] C-Stem Cemented Stem Charnley and Elite Plus LPW        | 725            | 2.45                   | 0.30                      | [-0.54 , 1.14]  | Non-inferiority not shown | 0.481   |
| [MoP] C-Stem Cemented Stem Elite Plus Cemented Cup            | 267            | 2.49                   | 0.35                      | [-1.08 , 1.79]  | Non-inferiority not shown | 0.632   |
| [MoP] C-Stem Cemented Stem Elite Plus Ogee                    | 882            | 2.57                   | 0.43                      | [-0.33 , 1.19]  | Non-inferiority not shown | 0.271   |
| [MoP] C-Stem Cemented Stem Opera                              | 356            | 3.79                   | 1.64                      | [ 0.21 , 3.08]  | Non-inferiority not shown | 0.025   |
| [MoP] C-Stem Cemented Stem Wroblewski Golf Ball               | 259            | 2.47                   | 0.33                      | [-0.94 , 1.59]  | Non-inferiority not shown | 0.614   |
| [MoP] CPT Elite Plus Ogee                                     | 408            | 3.16                   | 1.01                      | [ 0.04 , 1.98]  | Non-inferiority not shown | 0.041   |
| [MoP] CPT Trilogy                                             | 1,135          | 4.29                   | 2.14                      | [ 1.42 , 2.86]  | Inferior by $\geq 20\%$   | <0.001  |
| [MoP] CPT ZCA                                                 | 1,233          | 3.71                   | 1.57                      | [ 0.95 , 2.19]  | Inferior by $\geq 20\%$   | <0.001  |
| [MoP] Charnley Cemented Stem Charnley Cemented Cup            | 1,751          | 3.52                   | 1.38                      | [ 0.69 , 2.07]  | Inferior by $\geq 20\%$   | <0.001  |
| [MoP] Charnley Cemented Stem Charnley Ogee                    | 3,102          | 3.93                   | 1.78                      | [ 1.23 , 2.34]  | Inferior by $\geq 20\%$   | <0.001  |
| [MoP] Charnley Cemented Stem Charnley and Elite Plus LPW      | 2,284          | 2.43                   | 0.29                      | [-0.25 , 0.83]  | Non-inferiority not shown | 0.297   |
| [MoP] Charnley Cemented Stem Opera                            | 254            | 3.99                   | 1.85                      | [ 0.19 , 3.51]  | Non-inferiority not shown | 0.029   |
| [MoP] Charnley Cemented Stem Wroblewski Golf Ball             | 419            | 2.42                   | 0.28                      | [-0.81 , 1.36]  | Non-inferiority not shown | 0.619   |
| [MoP] Corail Duraloc Cementless Cup                           | 1,200          | 5.37                   | 3.22                      | [ 2.31 , 4.14]  | Inferior by $\geq 100\%$  | <0.001  |
| [MoP] Corail Pinnacle                                         | 1,681          | 3.05                   | 0.91                      | [ 0.45 , 1.36]  | Inferior by $\geq 20\%$   | <0.001  |
| [MoP] Elite Plus Cemented Stem Elite Plus Ogee                | 351            | 2.03                   | -0.11                     | [-1.41 , 1.19]  | Non-inferiority not shown | 0.865   |
| [MoP] Exeter V40 ABG II Cementless Cup                        | 429            | 2.62                   | 0.48                      | [-0.77 , 1.73]  | Non-inferiority not shown | 0.456   |
| [MoP] Exeter V40 Cenator Cemented Cup                         | 694            | 2.64                   | 0.49                      | [-0.29 , 1.28]  | Non-inferiority not shown | 0.219   |
| [MoP] Exeter V40 Charnley Ogee                                | 561            | 1.62                   | -0.52                     | [-1.26 , 0.21]  | Non-inferior              | 0.163   |
| [MoP] Exeter V40 Charnley and Elite Plus LPW                  | 404            | 2.44                   | 0.30                      | [-0.53 , 1.12]  | Non-inferiority not shown | 0.484   |
| [MoP] Exeter V40 Duraloc Cementless Cup                       | 451            | 4.19                   | 2.05                      | [ 0.62 , 3.48]  | Inferior by $\geq 20\%$   | 0.005   |
| [MoP] Exeter V40 Elite Plus Cemented Cup                      | 725            | 1.44                   | -0.70                     | [-1.31 , -0.09] | Non-inferior              | 0.024   |
| [MoP] Exeter V40 Exeter Contemporary Flanged                  | 4,653          | 2.28                   | 0.13                      | [-0.23 , 0.49]  | Non-inferiority not shown | 0.469   |

|    |                                                     |       |      |      |                |                           |        |
|----|-----------------------------------------------------|-------|------|------|----------------|---------------------------|--------|
| 1  | [MoP] Exeter V40 Exeter Contemporary Hooded         | 2,355 | 4.12 | 1.97 | [ 1.45 , 2.49] | Inferior by $\geq 20\%$   | <0.001 |
| 2  | [MoP] Exeter V40 Exeter Duration                    | 2,967 | 3.71 | 1.56 | [ 1.05 , 2.07] | Inferior by $\geq 20\%$   | <0.001 |
| 3  | [MoP] Exeter V40 Opera                              | 443   | 3.23 | 1.09 | [-0.03 , 2.21] | Non-inferiority not shown | 0.057  |
| 4  | [MoP] Exeter V40 Reflection Cementless              | 393   | 4.18 | 2.03 | [ 0.76 , 3.30] | Inferior by $\geq 20\%$   | 0.002  |
| 5  | [MoP] Exeter V40 Trident                            | 1,116 | 2.71 | 0.56 | [ 0.05 , 1.08] | Non-inferiority not shown | 0.031  |
| 6  | [MoP] Exeter V40 Trilogy                            | 1,538 | 2.49 | 0.35 | [-0.17 , 0.87] | Non-inferiority not shown | 0.191  |
| 7  | [MoP] Exeter V40 Ultima Cemented Cup                | 498   | 3.27 | 1.12 | [-0.03 , 2.27] | Non-inferiority not shown | 0.056  |
| 8  | [MoP] Furlong Cemented Stem JRI Cemented Cup        | 584   | 3.23 | 1.09 | [ 0.01 , 2.17] | Non-inferiority not shown | 0.048  |
| 9  | [MoP] Furlong HAC Stem CSF                          | 1,697 | 4.41 | 2.27 | [ 1.61 , 2.92] | Inferior by $\geq 20\%$   | <0.001 |
| 10 | [MoP] Muller-Biomet Apollo                          | 371   | 2.67 | 0.53 | [-0.56 , 1.62] | Non-inferiority not shown | 0.345  |
| 11 | [MoP] Omnifit Cemented Stem ODC                     | 458   | 3.89 | 1.74 | [ 0.35 , 3.14] | Non-inferiority not shown | 0.014  |
| 12 | [MoP] SP II Cemented Stem Interplanta               | 258   | 5.45 | 3.31 | [ 1.32 , 5.30] | Inferior by $\geq 20\%$   | 0.001  |
| 13 | [MoP] Stanmore Modular Stem Stanmore-Arcom Cup      | 669   | 2.52 | 0.38 | [-0.29 , 1.04] | Non-inferiority not shown | 0.264  |
| 14 | [MoP] Synergy Cementless Stem Reflection Cementless | 322   | 2.38 | 0.24 | [-0.80 , 1.28] | Non-inferiority not shown | 0.651  |
| 14 | [MoP] Versys Cementless Stem Trilogy                | 464   | 5.47 | 3.32 | [ 1.77 , 4.87] | Inferior by $\geq 20\%$   | <0.001 |

For peer review only

15  
16  
17  
18  
19  
20  
21  
22  
23  
24  
25  
26  
27  
28  
29  
30  
31  
32  
33  
34  
35  
36  
37  
38  
39  
40  
41  
42  
43  
44  
45  
46

Supplemental table 2a: Difference in Kaplan-Meier failure estimate between a contemporary reference and implants with at least 250 at risk at 3 years since primary in females

| Stem/cup brand                                                | Number at risk | Cumulative failure (%) | Difference in failure (%) | 95% CI        | Equivalence status        | p-value |
|---------------------------------------------------------------|----------------|------------------------|---------------------------|---------------|---------------------------|---------|
| [CoP] MS-30 Original ME Muller Low Profile Cup                | 1,096          | 0.41                   | [REFERENCE]               |               |                           |         |
| [CoC] ABG II Monolithic Cementless Stem ABG II Cementless Cup | 502            | 1.36                   | 0.96                      | [-0.11, 2.02] | Non-inferiority not shown | 0.079   |
| [CoC] ABG II Monolithic Cementless Stem Trident               | 465            | 2.24                   | 1.84                      | [ 0.48, 3.19] | Inferior by $\geq 100\%$  | 0.008   |
| [CoC] Accolade Trident                                        | 3,662          | 1.78                   | 1.37                      | [ 0.83, 1.92] | Inferior by $\geq 100\%$  | <0.001  |
| [CoC] Bimetric Cementless Stem Exceed ABT                     | 511            | 1.18                   | 0.77                      | [-0.17, 1.70] | Non-inferiority not shown | 0.108   |
| [CoC] C-Stem AMT Cemented Stem Pinnacle                       | 487            | 1.06                   | 0.65                      | [-0.22, 1.52] | Non-inferiority not shown | 0.143   |
| [CoC] CPT Continuum                                           | 481            | 1.17                   | 0.76                      | [-0.13, 1.64] | Non-inferiority not shown | 0.093   |
| [CoC] CPT Trilogy AB                                          | 305            | 0.97                   | 0.56                      | [-0.59, 1.71] | Non-inferiority not shown | 0.339   |
| [CoC] Corail Delta TT                                         | 453            | 1.90                   | 1.49                      | [ 0.44, 2.54] | Inferior by $\geq 100\%$  | 0.005   |
| [CoC] Corail DeltaMotion                                      | 696            | 1.22                   | 0.81                      | [-0.02, 1.65] | Non-inferiority not shown | 0.056   |
| [CoC] Corail Duraloc Option                                   | 580            | 1.68                   | 1.27                      | [ 0.18, 2.36] | Inferior by $\geq 20\%$   | 0.023   |
| [CoC] Corail Pinnacle                                         | 14,431         | 1.67                   | 1.26                      | [ 0.85, 1.66] | Inferior by $\geq 100\%$  | <0.001  |
| [CoC] Corail Pinnacle Gription                                | 292            | 2.28                   | 1.87                      | [ 0.57, 3.17] | Inferior by $\geq 100\%$  | 0.005   |
| [CoC] Corail Trinity                                          | 256            | 0.21                   | -0.20                     | [-0.74, 0.35] | Non-inferiority not shown | 0.474   |
| [CoC] Excia Cementless Plasmacup SC                           | 471            | 1.52                   | 1.11                      | [ 0.06, 2.17] | Non-inferiority not shown | 0.038   |
| [CoC] Exeter V40 ABG II Cementless Cup                        | 887            | 0.40                   | -0.01                     | [-0.54, 0.52] | Non-inferiority not shown | 0.964   |
| [CoC] Exeter V40 Trident                                      | 5,950          | 0.91                   | 0.51                      | [ 0.08, 0.93] | Non-inferiority not shown | 0.020   |
| [CoC] Furlong Evolution Cementless Furlong HAC CSF Plus       | 323            | 0.90                   | 0.49                      | [-0.17, 1.16] | Non-inferiority not shown | 0.147   |
| [CoC] Furlong HAC Stem CSF                                    | 881            | 1.54                   | 1.13                      | [ 0.26, 2.01] | Inferior by $\geq 20\%$   | 0.011   |
| [CoC] Furlong HAC Stem Furlong HAC CSF Plus                   | 4,954          | 1.49                   | 1.08                      | [ 0.62, 1.54] | Inferior by $\geq 100\%$  | <0.001  |
| [CoC] M/L Taper Cementless Continuum                          | 689            | 1.52                   | 1.11                      | [ 0.24, 1.98] | Inferior by $\geq 20\%$   | 0.012   |
| [CoC] Metafix Stem Trinity                                    | 469            | 1.43                   | 1.03                      | [ 0.13, 1.93] | Inferior by $\geq 20\%$   | 0.025   |
| [CoC] Omnifit Cementless Stem Trident                         | 267            | 2.20                   | 1.79                      | [ 0.01, 3.57] | Non-inferiority not shown | 0.048   |
| [CoC] Polarstem Cementless R3 Cementless                      | 460            | 1.10                   | 0.70                      | [-0.19, 1.59] | Non-inferiority not shown | 0.125   |
| [CoC] S-Rom Cementless Stem Pinnacle                          | 327            | 2.46                   | 2.06                      | [ 0.50, 3.61] | Inferior by $\geq 100\%$  | 0.010   |
| [CoC] SL-Plus Cementless Stem EP-Fit Plus                     | 602            | 1.75                   | 1.34                      | [ 0.26, 2.43] | Inferior by $\geq 20\%$   | 0.015   |
| [CoC] SPS Modular April - Ceramic                             | 302            | 2.39                   | 1.98                      | [ 0.31, 3.66] | Inferior by $\geq 20\%$   | 0.020   |
| [CoC] Summit Cementless Stem Pinnacle                         | 269            | 1.14                   | 0.73                      | [-0.44, 1.90] | Non-inferiority not shown | 0.223   |
| [CoC] Taperloc Cementless Stem Exceed ABT                     | 3,728          | 1.43                   | 1.02                      | [ 0.54, 1.50] | Inferior by $\geq 100\%$  | <0.001  |
| [CoC] miniHip Trinity                                         | 441            | 1.11                   | 0.70                      | [-0.19, 1.60] | Non-inferiority not shown | 0.125   |
| [CoP] Accolade Trident                                        | 1,760          | 1.39                   | 0.98                      | [ 0.40, 1.56] | Inferior by $\geq 20\%$   | 0.001   |
| [CoP] C-Stem Cemented Stem Elite Plus Ogee                    | 342            | 0.28                   | -0.12                     | [-0.79, 0.54] | Non-inferiority not shown | 0.716   |
| [CoP] C-Stem Cemented Stem Marathon                           | 626            | 1.01                   | 0.60                      | [-0.13, 1.33] | Non-inferiority not shown | 0.108   |
| [CoP] C-Stem Cemented Stem Opera                              | 445            | 0.22                   | -0.19                     | [-0.75, 0.38] | Non-inferiority not shown | 0.515   |
| [CoP] C-Stem Cemented Stem Wroblewski Golf Ball               | 517            | 0.53                   | 0.12                      | [-0.57, 0.82] | Non-inferiority not shown | 0.732   |
| [CoP] CPT Trilogy                                             | 871            | 1.24                   | 0.84                      | [ 0.27, 1.40] | Inferior by $\geq 20\%$   | 0.004   |
| [CoP] Corail Charnley and Elite Plus LPW                      | 376            | 2.14                   | 1.73                      | [ 0.30, 3.16] | Inferior by $\geq 20\%$   | 0.018   |
| [CoP] Corail Elite Plus Cemented Cup                          | 267            | 0.91                   | 0.50                      | [-0.58, 1.58] | Non-inferiority not shown | 0.367   |
| [CoP] Corail Elite Plus Ogee                                  | 268            | 1.67                   | 1.26                      | [-0.23, 2.76] | Non-inferiority not shown | 0.098   |
| [CoP] Corail Marathon                                         | 787            | 0.72                   | 0.31                      | [-0.26, 0.89] | Non-inferiority not shown | 0.285   |

|    |                                                            |       |      |       |                |                           |        |
|----|------------------------------------------------------------|-------|------|-------|----------------|---------------------------|--------|
| 1  | [CoP] Corail Pinnacle                                      | 4,637 | 1.27 | 0.86  | [ 0.43 , 1.29] | Inferior by $\geq 100\%$  | <0.001 |
| 2  | [CoP] Corail Trilogy                                       | 437   | 0.87 | 0.46  | [-0.46 , 1.39] | Non-inferiority not shown | 0.324  |
| 3  | [CoP] Exeter V40 Charnley and Elite Plus LPW               | 374   | 1.99 | 1.58  | [ 0.30 , 2.86] | Inferior by $\geq 20\%$   | 0.015  |
| 4  | [CoP] Exeter V40 Elite Plus Ogee                           | 655   | 0.57 | 0.16  | [-0.45 , 0.77] | Non-inferiority not shown | 0.611  |
| 5  | [CoP] Exeter V40 Exeter Contemporary Flanged               | 1,849 | 1.14 | 0.73  | [ 0.18 , 1.28] | Inferior by $\geq 20\%$   | 0.009  |
| 6  | [CoP] Exeter V40 Exeter Contemporary Hooded                | 482   | 1.83 | 1.42  | [ 0.29 , 2.56] | Inferior by $\geq 20\%$   | 0.014  |
| 7  | [CoP] Exeter V40 Exeter Duration                           | 476   | 0.93 | 0.52  | [-0.37 , 1.40] | Non-inferiority not shown | 0.251  |
| 8  | [CoP] Exeter V40 Exeter X3 Rimfit                          | 1,264 | 0.76 | 0.35  | [-0.14 , 0.84] | Non-inferiority not shown | 0.164  |
| 9  | [CoP] Exeter V40 Marathon                                  | 284   | 0.92 | 0.51  | [-0.48 , 1.49] | Non-inferiority not shown | 0.312  |
| 10 | [CoP] Exeter V40 Pinnacle                                  | 292   | 1.12 | 0.71  | [-0.20 , 1.62] | Non-inferiority not shown | 0.127  |
| 11 | [CoP] Exeter V40 Trident                                   | 2,940 | 0.93 | 0.52  | [ 0.08 , 0.96] | Inferior by $\geq 20\%$   | 0.020  |
| 12 | [CoP] Exeter V40 Trilogy                                   | 1,182 | 0.60 | 0.19  | [-0.36 , 0.74] | Non-inferiority not shown | 0.491  |
| 13 | [CoP] Exeter V40 Tritanium                                 | 250   | 1.74 | 1.33  | [ 0.12 , 2.55] | Inferior by $\geq 20\%$   | 0.032  |
| 14 | [CoP] Furlong HAC Stem CSF                                 | 3,748 | 1.32 | 0.91  | [ 0.41 , 1.41] | Inferior by $\geq 100\%$  | <0.001 |
| 15 | [CoP] Furlong HAC Stem Furlong HAC CSF Plus                | 840   | 2.36 | 1.95  | [ 0.99 , 2.91] | Inferior by $\geq 100\%$  | <0.001 |
| 16 | [CoP] SL-Plus Cementless Stem Bicon-Plus                   | 342   | 1.66 | 1.25  | [-0.11 , 2.61] | Non-inferiority not shown | 0.073  |
| 17 | [CoP] SL-Plus Cementless Stem EP-Fit Plus                  | 593   | 1.93 | 1.52  | [ 0.38 , 2.66] | Inferior by $\geq 20\%$   | 0.009  |
| 18 | [CoP] Stanmore Modular Stem Stanmore-Arcom Cup             | 262   | 1.58 | 1.17  | [-0.25 , 2.59] | Non-inferiority not shown | 0.106  |
| 19 | [CoP] Taperloc Cementless Stem Exceed ABT                  | 1,062 | 0.99 | 0.59  | [ 0.01 , 1.16] | Non-inferiority not shown | 0.046  |
| 20 | [MoP] Accolade Trident                                     | 5,487 | 1.75 | 1.34  | [ 0.86 , 1.82] | Inferior by $\geq 100\%$  | <0.001 |
| 21 | [MoP] Anthology R3 Cementless                              | 729   | 1.46 | 1.05  | [ 0.29 , 1.81] | Inferior by $\geq 20\%$   | 0.007  |
| 22 | [MoP] C-Stem AMT Cemented Stem Charnley and Elite Plus LPW | 1,437 | 0.91 | 0.50  | [-0.07 , 1.07] | Non-inferiority not shown | 0.085  |
| 23 | [MoP] C-Stem AMT Cemented Stem Elite Plus Cemented Cup     | 438   | 0.61 | 0.20  | [-0.57 , 0.97] | Non-inferiority not shown | 0.614  |
| 24 | [MoP] C-Stem AMT Cemented Stem Elite Plus Ogee             | 1,135 | 0.84 | 0.43  | [-0.15 , 1.01] | Non-inferiority not shown | 0.149  |
| 25 | [MoP] C-Stem AMT Cemented Stem Marathon                    | 751   | 0.88 | 0.47  | [-0.10 , 1.04] | Non-inferiority not shown | 0.108  |
| 26 | [MoP] C-Stem AMT Cemented Stem Pinnacle                    | 985   | 1.24 | 0.84  | [ 0.25 , 1.42] | Inferior by $\geq 20\%$   | 0.005  |
| 27 | [MoP] C-Stem Cemented Stem Charnley Ogee                   | 597   | 1.48 | 1.07  | [ 0.09 , 2.05] | Inferior by $\geq 20\%$   | 0.033  |
| 28 | [MoP] C-Stem Cemented Stem Charnley and Elite Plus LPW     | 1,119 | 1.17 | 0.76  | [ 0.05 , 1.46] | Non-inferiority not shown | 0.035  |
| 29 | [MoP] C-Stem Cemented Stem Duraloc Cementless Cup          | 420   | 1.59 | 1.18  | [-0.04 , 2.41] | Non-inferiority not shown | 0.058  |
| 30 | [MoP] C-Stem Cemented Stem Elite Plus Cemented Cup         | 390   | 0.47 | 0.06  | [-0.68 , 0.80] | Non-inferiority not shown | 0.870  |
| 31 | [MoP] C-Stem Cemented Stem Elite Plus Ogee                 | 1,985 | 0.69 | 0.28  | [-0.21 , 0.78] | Non-inferiority not shown | 0.257  |
| 32 | [MoP] C-Stem Cemented Stem Marathon                        | 959   | 0.63 | 0.22  | [-0.30 , 0.73] | Non-inferiority not shown | 0.407  |
| 33 | [MoP] C-Stem Cemented Stem Opera                           | 836   | 0.68 | 0.27  | [-0.38 , 0.91] | Non-inferiority not shown | 0.417  |
| 34 | [MoP] C-Stem Cemented Stem Pinnacle                        | 301   | 1.59 | 1.19  | [-0.13 , 2.50] | Non-inferiority not shown | 0.077  |
| 35 | [MoP] C-Stem Cemented Stem Wroblewski Golf Ball            | 625   | 0.74 | 0.33  | [-0.41 , 1.07] | Non-inferiority not shown | 0.379  |
| 36 | [MoP] CCA Cemented Stem CCB Cup                            | 793   | 0.62 | 0.21  | [-0.40 , 0.82] | Non-inferiority not shown | 0.501  |
| 37 | [MoP] CLS Cementless Stem Allofit                          | 336   | 1.93 | 1.52  | [ 0.06 , 2.99] | Non-inferiority not shown | 0.041  |
| 38 | [MoP] CLS Cementless Stem Trilogy                          | 321   | 3.16 | 2.75  | [ 0.88 , 4.62] | Inferior by $\geq 100\%$  | 0.004  |
| 39 | [MoP] CMK Modular Cemented Stem CMK Cemented Cup           | 319   | 0.30 | -0.11 | [-0.79 , 0.58] | Non-inferiority not shown | 0.755  |
| 40 | [MoP] CPCS Opera                                           | 804   | 0.95 | 0.55  | [-0.20 , 1.30] | Non-inferiority not shown | 0.153  |
| 41 | [MoP] CPCS Polarcup Cementless                             | 259   | 0.76 | 0.35  | [-0.76 , 1.46] | Non-inferiority not shown | 0.535  |
| 42 | [MoP] CPCS Reflection Cemented                             | 264   | 1.10 | 0.69  | [-0.26 , 1.64] | Non-inferiority not shown | 0.156  |
| 43 | [MoP] CPS Plus Cenator Cemented Cup                        | 268   | 0.37 | -0.04 | [-0.85 , 0.77] | Non-inferiority not shown | 0.931  |
| 44 | [MoP] CPS Plus Opera                                       | 327   | 1.17 | 0.76  | [-0.43 , 1.96] | Non-inferiority not shown | 0.211  |
| 45 | [MoP] CPT Allofit                                          | 485   | 0.32 | -0.09 | [-0.66 , 0.48] | Non-inferiority not shown | 0.752  |
| 46 | [MoP] CPT Continuum                                        | 315   | 2.66 | 2.25  | [ 1.17 , 3.33] | Inferior by $\geq 100\%$  | <0.001 |

|    |                                                          |        |      |       |                |                           |        |
|----|----------------------------------------------------------|--------|------|-------|----------------|---------------------------|--------|
| 1  | [MoP] CPT Elite Plus Ogee                                | 1,550  | 1.24 | 0.83  | [ 0.21 , 1.46] | Inferior by $\geq 20\%$   | 0.009  |
| 2  | [MoP] CPT Exeter Contemporary Flanged                    | 283    | 2.17 | 1.76  | [ 0.31 , 3.21] | Inferior by $\geq 20\%$   | 0.017  |
| 3  | [MoP] CPT Opera                                          | 268    | 1.06 | 0.66  | [-0.59 , 1.91] | Non-inferiority not shown | 0.303  |
| 4  | [MoP] CPT Original ME Muller Low Profile Cup             | 600    | 1.30 | 0.89  | [ 0.00 , 1.78] | Non-inferiority not shown | 0.050  |
| 5  | [MoP] CPT Pinnacle                                       | 511    | 1.59 | 1.19  | [ 0.09 , 2.28] | Inferior by $\geq 20\%$   | 0.033  |
| 6  | [MoP] CPT Trabecular Metal Modular Cementless Cup        | 645    | 1.72 | 1.32  | [ 0.40 , 2.23] | Inferior by $\geq 20\%$   | 0.005  |
| 7  | [MoP] CPT Trilogy                                        | 5,622  | 1.20 | 0.79  | [ 0.35 , 1.22] | Inferior by $\geq 20\%$   | <0.001 |
| 8  | [MoP] CPT Trilogy IT                                     | 304    | 2.93 | 2.52  | [ 1.48 , 3.57] | Inferior by $\geq 100\%$  | <0.001 |
| 9  | [MoP] CPT ZCA                                            | 5,377  | 1.34 | 0.93  | [ 0.49 , 1.38] | Inferior by $\geq 100\%$  | <0.001 |
| 10 | [MoP] Centrament Chirulen                                | 294    | 0.00 | --    | [ -- , -- ]    | No failures to date       |        |
| 11 | [MoP] Charnley Cemented Stem Charnley Cemented Cup       | 2,552  | 0.97 | 0.56  | [ 0.04 , 1.07] | Non-inferiority not shown | 0.033  |
| 12 | [MoP] Charnley Cemented Stem Charnley Ogee               | 5,409  | 1.08 | 0.67  | [ 0.22 , 1.11] | Inferior by $\geq 20\%$   | 0.003  |
| 13 | [MoP] Charnley Cemented Stem Charnley and Elite Plus LPW | 4,125  | 0.61 | 0.20  | [-0.22 , 0.63] | Non-inferiority not shown | 0.352  |
| 14 | [MoP] Charnley Cemented Stem Opera                       | 823    | 0.70 | 0.29  | [-0.37 , 0.96] | Non-inferiority not shown | 0.385  |
| 15 | [MoP] Charnley Cemented Stem Wroblewski Golf Ball        | 609    | 1.53 | 1.12  | [ 0.11 , 2.12] | Inferior by $\geq 20\%$   | 0.029  |
| 16 | [MoP] Charnley Modular Charnley and Elite Plus LPW       | 275    | 0.36 | -0.05 | [-0.84 , 0.75] | Non-inferiority not shown | 0.908  |
| 17 | [MoP] Corail Charnley and Elite Plus LPW                 | 543    | 0.83 | 0.42  | [-0.33 , 1.17] | Non-inferiority not shown | 0.274  |
| 18 | [MoP] Corail Duraloc Cementless Cup                      | 2,139  | 1.30 | 0.89  | [ 0.30 , 1.48] | Inferior by $\geq 20\%$   | 0.003  |
| 19 | [MoP] Corail Elite Plus Cemented Cup                     | 629    | 0.42 | 0.02  | [-0.58 , 0.62] | Non-inferiority not shown | 0.955  |
| 20 | [MoP] Corail Elite Plus Ogee                             | 937    | 1.08 | 0.67  | [-0.01 , 1.36] | Non-inferiority not shown | 0.055  |
| 21 | [MoP] Corail Exeter Contemporary Flanged                 | 376    | 0.95 | 0.54  | [-0.37 , 1.45] | Non-inferiority not shown | 0.246  |
| 22 | [MoP] Corail Marathon                                    | 1,873  | 0.80 | 0.39  | [-0.08 , 0.87] | Non-inferiority not shown | 0.107  |
| 23 | [MoP] Corail Pinnacle                                    | 17,132 | 1.26 | 0.85  | [ 0.47 , 1.23] | Inferior by $\geq 100\%$  | <0.001 |
| 24 | [MoP] Corail Trident                                     | 385    | 1.01 | 0.60  | [-0.23 , 1.43] | Non-inferiority not shown | 0.154  |
| 25 | [MoP] Corail Trilogy                                     | 1,066  | 0.90 | 0.50  | [-0.15 , 1.14] | Non-inferiority not shown | 0.129  |
| 26 | [MoP] Elite Plus Cemented Stem Elite Plus Ogee           | 402    | 0.49 | 0.08  | [-0.68 , 0.84] | Non-inferiority not shown | 0.842  |
| 27 | [MoP] Exeter V40 ABG II Cementless Cup                   | 477    | 0.80 | 0.39  | [-0.47 , 1.25] | Non-inferiority not shown | 0.373  |
| 28 | [MoP] Exeter V40 Cenator Cemented Cup                    | 1,425  | 1.45 | 1.04  | [ 0.35 , 1.73] | Inferior by $\geq 20\%$   | 0.003  |
| 29 | [MoP] Exeter V40 Charnley Ogee                           | 1,068  | 1.00 | 0.59  | [-0.08 , 1.26] | Non-inferiority not shown | 0.083  |
| 30 | [MoP] Exeter V40 Charnley and Elite Plus LPW             | 1,811  | 1.31 | 0.90  | [ 0.31 , 1.50] | Inferior by $\geq 20\%$   | 0.003  |
| 31 | [MoP] Exeter V40 Duraloc Cementless Cup                  | 708    | 1.10 | 0.69  | [-0.15 , 1.53] | Non-inferiority not shown | 0.106  |
| 32 | [MoP] Exeter V40 EP-Fit Plus                             | 333    | 1.17 | 0.77  | [-0.43 , 1.96] | Non-inferiority not shown | 0.210  |
| 33 | [MoP] Exeter V40 Elite Plus Cemented Cup                 | 2,389  | 0.45 | 0.04  | [-0.39 , 0.48] | Non-inferiority not shown | 0.842  |
| 34 | [MoP] Exeter V40 Elite Plus Ogee                         | 10,898 | 0.70 | 0.29  | [-0.10 , 0.67] | Non-inferiority not shown | 0.142  |
| 35 | [MoP] Exeter V40 Exceed                                  | 333    | 0.85 | 0.44  | [-0.58 , 1.46] | Non-inferiority not shown | 0.397  |
| 36 | [MoP] Exeter V40 Exceed ABT                              | 284    | 0.94 | 0.53  | [-0.45 , 1.52] | Non-inferiority not shown | 0.290  |
| 37 | [MoP] Exeter V40 Exeter Contemporary Flanged             | 27,147 | 0.71 | 0.30  | [-0.07 , 0.67] | Non-inferiority not shown | 0.113  |
| 38 | [MoP] Exeter V40 Exeter Contemporary Hooded              | 10,906 | 1.39 | 0.98  | [ 0.58 , 1.39] | Inferior by $\geq 100\%$  | <0.001 |
| 39 | [MoP] Exeter V40 Exeter Duration                         | 8,897  | 1.05 | 0.64  | [ 0.23 , 1.05] | Inferior by $\geq 20\%$   | 0.002  |
| 40 | [MoP] Exeter V40 Exeter X3 Rimfit                        | 3,408  | 0.73 | 0.32  | [-0.09 , 0.73] | Non-inferiority not shown | 0.123  |
| 41 | [MoP] Exeter V40 Furlong HAC CSF Plus                    | 340    | 0.17 | -0.24 | [-0.73 , 0.25] | Non-inferiority not shown | 0.333  |
| 42 | [MoP] Exeter V40 Marathon                                | 884    | 0.88 | 0.47  | [-0.12 , 1.06] | Non-inferiority not shown | 0.119  |
| 43 | [MoP] Exeter V40 Opera                                   | 1,660  | 0.72 | 0.31  | [-0.22 , 0.84] | Non-inferiority not shown | 0.248  |
| 44 | [MoP] Exeter V40 Pinnacle                                | 1,807  | 0.97 | 0.56  | [ 0.05 , 1.07] | Non-inferiority not shown | 0.033  |
| 45 | [MoP] Exeter V40 R3 Cementless                           | 363    | 0.90 | 0.49  | [-0.27 , 1.26] | Non-inferiority not shown | 0.205  |
| 46 | [MoP] Exeter V40 Reflection Cementless                   | 1,308  | 0.73 | 0.32  | [-0.25 , 0.90] | Non-inferiority not shown | 0.273  |

|    |                                                               |        |      |       |                |                           |        |
|----|---------------------------------------------------------------|--------|------|-------|----------------|---------------------------|--------|
| 1  | [MoP] Exeter V40 Trabecular Metal Modular Cementless Cup      | 286    | 1.55 | 1.14  | [-0.14 , 2.42] | Non-inferiority not shown | 0.081  |
| 2  | [MoP] Exeter V40 Trident                                      | 11,298 | 0.97 | 0.57  | [ 0.18 , 0.95] | Inferior by $\geq 20\%$   | 0.004  |
| 3  | [MoP] Exeter V40 Trilogy                                      | 5,145  | 0.83 | 0.43  | [ 0.00 , 0.85] | Non-inferiority not shown | 0.050  |
| 4  | [MoP] Exeter V40 Tritanium                                    | 282    | 1.60 | 1.19  | [ 0.12 , 2.25] | Inferior by $\geq 20\%$   | 0.029  |
| 5  | [MoP] Exeter V40 Ultima Cemented Cup                          | 777    | 1.10 | 0.69  | [-0.11 , 1.49] | Non-inferiority not shown | 0.090  |
| 6  | [MoP] Furlong Cemented Stem JRI Cemented Cup                  | 1,036  | 1.43 | 1.02  | [ 0.24 , 1.81] | Inferior by $\geq 20\%$   | 0.010  |
| 7  | [MoP] Furlong HAC Stem CSF                                    | 4,074  | 2.18 | 1.77  | [ 1.22 , 2.33] | Inferior by $\geq 100\%$  | <0.001 |
| 8  | [MoP] Furlong HAC Stem Furlong HAC CSF Plus                   | 1,829  | 2.12 | 1.71  | [ 1.07 , 2.36] | Inferior by $\geq 100\%$  | <0.001 |
| 9  | [MoP] Furlong HAC Stem Furlong Threaded                       | 311    | 1.83 | 1.42  | [-0.07 , 2.92] | Non-inferiority not shown | 0.062  |
| 10 | [MoP] M/L Taper Cementless Continuum                          | 381    | 1.72 | 1.31  | [ 0.24 , 2.37] | Inferior by $\geq 20\%$   | 0.016  |
| 11 | [MoP] M/L Taper Cementless Trilogy                            | 281    | 2.08 | 1.68  | [ 0.34 , 3.01] | Inferior by $\geq 20\%$   | 0.014  |
| 12 | [MoP] MS-30 Original ME Muller Low Profile Cup                | 522    | 0.28 | -0.13 | [-0.66 , 0.40] | Non-inferiority not shown | 0.637  |
| 13 | [MoP] Muller Straight Stem Centerpulse Muller                 | 328    | 0.88 | 0.47  | [-0.58 , 1.52] | Non-inferiority not shown | 0.382  |
| 14 | [MoP] Muller Straight Stem Original ME Muller Low Profile Cup | 999    | 0.92 | 0.52  | [-0.12 , 1.15] | Non-inferiority not shown | 0.112  |
| 15 | [MoP] Muller-Biomet Apollo                                    | 1,201  | 1.32 | 0.91  | [ 0.19 , 1.63] | Inferior by $\geq 20\%$   | 0.013  |
| 16 | [MoP] Muller-Biomet Original ME Muller Low Profile Cup        | 707    | 1.32 | 0.91  | [ 0.02 , 1.80] | Non-inferiority not shown | 0.044  |
| 17 | [MoP] Omnifit Cemented Stem ODC                               | 614    | 1.56 | 1.15  | [ 0.13 , 2.18] | Inferior by $\geq 20\%$   | 0.027  |
| 18 | [MoP] Omnifit Cementless Stem Trident                         | 251    | 2.95 | 2.55  | [ 0.50 , 4.60] | Inferior by $\geq 100\%$  | 0.015  |
| 19 | [MoP] P10 Muller Original ME Muller Low Profile Cup           | 268    | 1.03 | 0.62  | [-0.59 , 1.83] | Non-inferiority not shown | 0.317  |
| 20 | [MoP] Polarstem Cementless R3 Cementless                      | 592    | 0.73 | 0.33  | [-0.19 , 0.85] | Non-inferiority not shown | 0.217  |
| 21 | [MoP] SL-Plus Cementless Stem EP-Fit Plus                     | 1,198  | 2.40 | 2.00  | [ 1.14 , 2.85] | Inferior by $\geq 100\%$  | <0.001 |
| 22 | [MoP] SP II Cemented Stem Interplanta                         | 444    | 1.84 | 1.43  | [ 0.19 , 2.68] | Inferior by $\geq 20\%$   | 0.024  |
| 23 | [MoP] Stanmore Modular Stem Elite Plus Cemented Cup           | 367    | 0.26 | -0.15 | [-0.77 , 0.48] | Non-inferiority not shown | 0.647  |
| 24 | [MoP] Stanmore Modular Stem SHP Cup                           | 664    | 0.75 | 0.34  | [-0.36 , 1.04] | Non-inferiority not shown | 0.339  |
| 25 | [MoP] Stanmore Modular Stem Stanmore-Arcom Cup                | 2,729  | 1.12 | 0.71  | [ 0.19 , 1.23] | Inferior by $\geq 20\%$   | 0.007  |
| 26 | [MoP] Synergy Cementless Stem R3 Cementless                   | 554    | 1.00 | 0.59  | [-0.08 , 1.26] | Non-inferiority not shown | 0.082  |
| 27 | [MoP] Synergy Cementless Stem Reflection Cementless           | 859    | 0.68 | 0.27  | [-0.38 , 0.92] | Non-inferiority not shown | 0.416  |
| 28 | [MoP] Taperfit Cemented Stem Atlas IIIp                       | 327    | 1.14 | 0.73  | [-0.33 , 1.79] | Non-inferiority not shown | 0.177  |
| 29 | [MoP] Taperloc Cementless Stem Exceed                         | 318    | 1.20 | 0.79  | [-0.43 , 2.01] | Non-inferiority not shown | 0.204  |
| 30 | [MoP] Taperloc Cementless Stem Exceed ABT                     | 2,287  | 1.98 | 1.57  | [ 0.98 , 2.16] | Inferior by $\geq 100\%$  | <0.001 |
| 31 | [MoP] Versys Cementless Stem Trilogy                          | 492    | 3.79 | 3.38  | [ 1.71 , 5.05] | Inferior by $\geq 100\%$  | <0.001 |

**Supplemental table 2b: Difference in Kaplan-Meier failure estimate between a contemporary reference and implants with at least 250 at risk at 5 years since primary in females**

| Stem/cup brand                                                | Number at risk | Cumulative failure (%) | Difference in failure (%) | 95% CI         | Equivalence status        | p-value |
|---------------------------------------------------------------|----------------|------------------------|---------------------------|----------------|---------------------------|---------|
| [MoP] Exeter V40 Elite Plus Cemented Cup                      | 1,769          | 0.54                   | [REFERENCE]               |                |                           |         |
| [CoC] ABG II Monolithic Cementless Stem ABG II Cementless Cup | 485            | 1.76                   | 1.22                      | [ 0.05 , 2.40] | Non-inferiority not shown | 0.041   |
| [CoC] ABG II Monolithic Cementless Stem Trident               | 372            | 2.95                   | 2.41                      | [ 0.86 , 3.96] | Inferior by $\geq 100\%$  | 0.002   |
| [CoC] Accolade Trident                                        | 2,906          | 2.56                   | 2.02                      | [ 1.44 , 2.59] | Inferior by $\geq 100\%$  | <0.001  |
| [CoC] Bimetric Cementless Stem Exceed ABT                     | 369            | 1.84                   | 1.30                      | [ 0.13 , 2.48] | Inferior by $\geq 20\%$   | 0.030   |
| [CoC] C-Stem AMT Cemented Stem Pinnacle                       | 268            | 1.80                   | 1.26                      | [ 0.08 , 2.44] | Non-inferiority not shown | 0.037   |
| [CoC] CPT Trilogy AB                                          | 278            | 1.64                   | 1.10                      | [-0.35 , 2.55] | Non-inferiority not shown | 0.138   |
| [CoC] Corail DeltaMotion                                      | 373            | 1.47                   | 0.93                      | [-0.01 , 1.86] | Non-inferiority not shown | 0.051   |
| [CoC] Corail Duraloc Option                                   | 566            | 2.70                   | 2.16                      | [ 0.83 , 3.49] | Inferior by $\geq 100\%$  | 0.001   |
| [CoC] Corail Pinnacle                                         | 9,650          | 2.16                   | 1.62                      | [ 1.26 , 1.97] | Inferior by $\geq 100\%$  | <0.001  |
| [CoC] Excia Cementless Plasmacup SC                           | 266            | 1.52                   | 0.98                      | [-0.04 , 2.01] | Non-inferiority not shown | 0.061   |
| [CoC] Exeter V40 ABG II Cementless Cup                        | 760            | 1.10                   | 0.56                      | [-0.17 , 1.30] | Non-inferiority not shown | 0.133   |
| [CoC] Exeter V40 Trident                                      | 4,852          | 1.27                   | 0.74                      | [ 0.35 , 1.13] | Inferior by $\geq 20\%$   | <0.001  |
| [CoC] Furlong HAC Stem CSF                                    | 839            | 2.11                   | 1.57                      | [ 0.59 , 2.55] | Inferior by $\geq 100\%$  | 0.002   |
| [CoC] Furlong HAC Stem Furlong HAC CSF Plus                   | 3,077          | 1.78                   | 1.24                      | [ 0.81 , 1.68] | Inferior by $\geq 100\%$  | <0.001  |
| [CoC] M/L Taper Cementless Continuum                          | 304            | 1.68                   | 1.14                      | [ 0.25 , 2.04] | Inferior by $\geq 20\%$   | 0.012   |
| [CoC] S-Rom Cementless Stem Pinnacle                          | 251            | 3.21                   | 2.67                      | [ 0.83 , 4.52] | Inferior by $\geq 100\%$  | 0.004   |
| [CoC] SL-Plus Cementless Stem EP-Fit Plus                     | 565            | 3.43                   | 2.89                      | [ 1.42 , 4.36] | Inferior by $\geq 100\%$  | <0.001  |
| [CoC] Taperloc Cementless Stem Exceed ABT                     | 2,243          | 1.79                   | 1.25                      | [ 0.78 , 1.72] | Inferior by $\geq 100\%$  | <0.001  |
| [CoP] Accolade Trident                                        | 828            | 1.84                   | 1.31                      | [ 0.66 , 1.95] | Inferior by $\geq 100\%$  | <0.001  |
| [CoP] C-Stem Cemented Stem Elite Plus Ogee                    | 262            | 0.62                   | 0.08                      | [-0.82 , 0.98] | Non-inferiority not shown | 0.860   |
| [CoP] C-Stem Cemented Stem Marathon                           | 297            | 1.21                   | 0.67                      | [-0.13 , 1.48] | Non-inferiority not shown | 0.099   |
| [CoP] C-Stem Cemented Stem Opera                              | 374            | 1.20                   | 0.66                      | [-0.42 , 1.74] | Non-inferiority not shown | 0.232   |
| [CoP] C-Stem Cemented Stem Wroblewski Golf Ball               | 417            | 0.73                   | 0.19                      | [-0.57 , 0.95] | Non-inferiority not shown | 0.628   |
| [CoP] Corail Charnley and Elite Plus LPW                      | 321            | 2.42                   | 1.88                      | [ 0.37 , 3.39] | Inferior by $\geq 20\%$   | 0.015   |
| [CoP] Corail Marathon                                         | 333            | 1.04                   | 0.50                      | [-0.19 , 1.19] | Non-inferiority not shown | 0.153   |
| [CoP] Corail Pinnacle                                         | 2,442          | 1.71                   | 1.17                      | [ 0.75 , 1.59] | Inferior by $\geq 100\%$  | <0.001  |
| [CoP] Corail Trilogy                                          | 397            | 1.10                   | 0.56                      | [-0.44 , 1.56] | Non-inferiority not shown | 0.269   |
| [CoP] Exeter V40 Elite Plus Ogee                              | 478            | 1.06                   | 0.52                      | [-0.27 , 1.31] | Non-inferiority not shown | 0.198   |
| [CoP] Exeter V40 Exeter Contemporary Flanged                  | 1,225          | 1.60                   | 1.06                      | [ 0.45 , 1.66] | Inferior by $\geq 20\%$   | 0.001   |
| [CoP] Exeter V40 Exeter Contemporary Hooded                   | 358            | 2.31                   | 1.77                      | [ 0.48 , 3.06] | Inferior by $\geq 20\%$   | 0.007   |
| [CoP] Exeter V40 Exeter Duration                              | 405            | 0.93                   | 0.39                      | [-0.47 , 1.24] | Non-inferiority not shown | 0.374   |
| [CoP] Exeter V40 Trident                                      | 1,446          | 1.28                   | 0.75                      | [ 0.29 , 1.20] | Inferior by $\geq 20\%$   | 0.001   |
| [CoP] Exeter V40 Trilogy                                      | 997            | 0.86                   | 0.32                      | [-0.26 , 0.89] | Non-inferiority not shown | 0.278   |
| [CoP] Furlong HAC Stem CSF                                    | 3,217          | 1.83                   | 1.29                      | [ 0.79 , 1.79] | Inferior by $\geq 100\%$  | <0.001  |
| [CoP] Furlong HAC Stem Furlong HAC CSF Plus                   | 508            | 2.55                   | 2.01                      | [ 1.01 , 3.01] | Inferior by $\geq 100\%$  | <0.001  |
| [CoP] MS-30 Original ME Muller Low Profile Cup                | 796            | 0.64                   | 0.10                      | [-0.45 , 0.65] | Non-inferiority not shown | 0.725   |
| [CoP] SL-Plus Cementless Stem Bicon-Plus                      | 306            | 3.49                   | 2.95                      | [ 0.99 , 4.91] | Inferior by $\geq 100\%$  | 0.003   |
| [CoP] SL-Plus Cementless Stem EP-Fit Plus                     | 499            | 3.49                   | 2.95                      | [ 1.46 , 4.45] | Inferior by $\geq 100\%$  | <0.001  |
| [CoP] Taperloc Cementless Stem Exceed ABT                     | 466            | 1.23                   | 0.69                      | [ 0.07 , 1.31] | Non-inferiority not shown | 0.029   |



|    |                                                            |        |      |       |                |                           |        |
|----|------------------------------------------------------------|--------|------|-------|----------------|---------------------------|--------|
| 1  | [MoP] Accolade Trident                                     | 3,698  | 2.36 | 1.82  | [ 1.34 , 2.29] | Inferior by $\geq 100\%$  | <0.001 |
| 2  | [MoP] C-Stem AMT Cemented Stem Charnley and Elite Plus LPW | 954    | 1.29 | 0.75  | [ 0.13 , 1.37] | Inferior by $\geq 20\%$   | 0.017  |
| 3  | [MoP] C-Stem AMT Cemented Stem Elite Plus Cemented Cup     | 313    | 0.85 | 0.31  | [-0.57 , 1.18] | Non-inferiority not shown | 0.488  |
| 4  | [MoP] C-Stem AMT Cemented Stem Elite Plus Ogee             | 666    | 1.18 | 0.64  | [-0.02 , 1.30] | Non-inferiority not shown | 0.058  |
| 5  | [MoP] C-Stem AMT Cemented Stem Pinnacle                    | 426    | 1.66 | 1.12  | [ 0.40 , 1.83] | Inferior by $\geq 20\%$   | 0.002  |
| 6  | [MoP] C-Stem Cemented Stem Charnley Ogee                   | 480    | 2.25 | 1.71  | [ 0.50 , 2.92] | Inferior by $\geq 20\%$   | 0.006  |
| 7  | [MoP] C-Stem Cemented Stem Charnley and Elite Plus LPW     | 1,007  | 1.81 | 1.28  | [ 0.46 , 2.09] | Inferior by $\geq 20\%$   | 0.002  |
| 8  | [MoP] C-Stem Cemented Stem Duraloc Cementless Cup          | 388    | 2.33 | 1.79  | [ 0.34 , 3.24] | Inferior by $\geq 20\%$   | 0.016  |
| 9  | [MoP] C-Stem Cemented Stem Elite Plus Cemented Cup         | 357    | 0.47 | -0.07 | [-0.77 , 0.64] | Non-inferiority not shown | 0.848  |
| 10 | [MoP] C-Stem Cemented Stem Elite Plus Ogee                 | 1,554  | 1.02 | 0.49  | [-0.02 , 0.99] | Non-inferiority not shown | 0.062  |
| 11 | [MoP] C-Stem Cemented Stem Marathon                        | 473    | 0.91 | 0.37  | [-0.24 , 0.98] | Non-inferiority not shown | 0.235  |
| 12 | [MoP] C-Stem Cemented Stem Opera                           | 626    | 0.95 | 0.41  | [-0.30 , 1.13] | Non-inferiority not shown | 0.259  |
| 13 | [MoP] C-Stem Cemented Stem Wroblewski Golf Ball            | 488    | 1.61 | 1.07  | [ 0.04 , 2.11] | Non-inferiority not shown | 0.042  |
| 14 | [MoP] CCA Cemented Stem CCB Cup                            | 535    | 0.92 | 0.38  | [-0.32 , 1.08] | Non-inferiority not shown | 0.289  |
| 15 | [MoP] CLS Cementless Stem Allofit                          | 316    | 2.53 | 1.99  | [ 0.33 , 3.64] | Inferior by $\geq 20\%$   | 0.019  |
| 16 | [MoP] CMK Modular Cemented Stem CMK Cemented Cup           | 291    | 1.25 | 0.72  | [-0.54 , 1.97] | Non-inferiority not shown | 0.263  |
| 17 | [MoP] CPCS Opera                                           | 586    | 1.63 | 1.09  | [ 0.17 , 2.02] | Inferior by $\geq 20\%$   | 0.020  |
| 18 | [MoP] CPS Plus Opera                                       | 309    | 1.78 | 1.25  | [-0.20 , 2.69] | Non-inferiority not shown | 0.090  |
| 19 | [MoP] CPT Allofit                                          | 308    | 0.58 | 0.04  | [-0.69 , 0.77] | Non-inferiority not shown | 0.921  |
| 20 | [MoP] CPT Elite Plus Ogee                                  | 1,115  | 1.60 | 1.06  | [ 0.40 , 1.73] | Inferior by $\geq 20\%$   | 0.002  |
| 21 | [MoP] CPT Opera                                            | 252    | 1.84 | 1.30  | [-0.32 , 2.92] | Non-inferiority not shown | 0.116  |
| 22 | [MoP] CPT Original ME Muller Low Profile Cup               | 322    | 1.98 | 1.44  | [ 0.28 , 2.60] | Inferior by $\geq 20\%$   | 0.015  |
| 23 | [MoP] CPT Pinnacle                                         | 433    | 2.03 | 1.49  | [ 0.27 , 2.72] | Inferior by $\geq 20\%$   | 0.017  |
| 24 | [MoP] CPT Trabecular Metal Modular Cementless Cup          | 399    | 2.48 | 1.95  | [ 0.79 , 3.10] | Inferior by $\geq 100\%$  | 0.001  |
| 25 | [MoP] CPT Trilogy                                          | 3,903  | 2.10 | 1.56  | [ 1.11 , 2.01] | Inferior by $\geq 100\%$  | <0.001 |
| 26 | [MoP] CPT ZCA                                              | 3,998  | 1.98 | 1.44  | [ 1.00 , 1.88] | Inferior by $\geq 100\%$  | <0.001 |
| 27 | [MoP] Charnley Cemented Stem Charnley Cemented Cup         | 2,265  | 1.42 | 0.88  | [ 0.35 , 1.41] | Inferior by $\geq 20\%$   | 0.001  |
| 28 | [MoP] Charnley Cemented Stem Charnley Ogee                 | 4,710  | 1.63 | 1.10  | [ 0.67 , 1.53] | Inferior by $\geq 100\%$  | <0.001 |
| 29 | [MoP] Charnley Cemented Stem Charnley and Elite Plus LPW   | 3,628  | 1.00 | 0.46  | [ 0.05 , 0.86] | Non-inferiority not shown | 0.027  |
| 30 | [MoP] Charnley Cemented Stem Opera                         | 697    | 1.35 | 0.81  | [-0.03 , 1.65] | Non-inferiority not shown | 0.058  |
| 31 | [MoP] Charnley Cemented Stem Wroblewski Golf Ball          | 487    | 1.73 | 1.19  | [ 0.14 , 2.24] | Inferior by $\geq 20\%$   | 0.027  |
| 32 | [MoP] Corail Charnley and Elite Plus LPW                   | 332    | 1.29 | 0.75  | [-0.21 , 1.71] | Non-inferiority not shown | 0.126  |
| 33 | [MoP] Corail Duraloc Cementless Cup                        | 2,023  | 2.10 | 1.56  | [ 0.90 , 2.22] | Inferior by $\geq 100\%$  | <0.001 |
| 34 | [MoP] Corail Elite Plus Cemented Cup                       | 481    | 0.99 | 0.45  | [-0.39 , 1.29] | Non-inferiority not shown | 0.295  |
| 35 | [MoP] Corail Elite Plus Ogee                               | 678    | 1.65 | 1.11  | [ 0.30 , 1.93] | Inferior by $\geq 20\%$   | 0.007  |
| 36 | [MoP] Corail Marathon                                      | 921    | 0.93 | 0.40  | [-0.06 , 0.85] | Non-inferiority not shown | 0.089  |
| 37 | [MoP] Corail Pinnacle                                      | 10,090 | 1.56 | 1.03  | [ 0.71 , 1.35] | Inferior by $\geq 100\%$  | <0.001 |
| 38 | [MoP] Corail Trilogy                                       | 859    | 1.22 | 0.69  | [-0.01 , 1.38] | Non-inferiority not shown | 0.054  |
| 39 | [MoP] Elite Plus Cemented Stem Elite Plus Ogee             | 362    | 1.26 | 0.72  | [-0.41 , 1.86] | Non-inferiority not shown | 0.211  |
| 40 | [MoP] Exeter V40 ABG II Cementless Cup                     | 458    | 1.01 | 0.47  | [-0.45 , 1.40] | Non-inferiority not shown | 0.315  |
| 41 | [MoP] Exeter V40 Cenator Cemented Cup                      | 1,153  | 2.12 | 1.58  | [ 0.80 , 2.36] | Inferior by $\geq 100\%$  | <0.001 |
| 42 | [MoP] Exeter V40 Charnley Ogee                             | 900    | 1.39 | 0.85  | [ 0.12 , 1.59] | Inferior by $\geq 20\%$   | 0.023  |
| 43 | [MoP] Exeter V40 Charnley and Elite Plus LPW               | 1,309  | 1.61 | 1.07  | [ 0.46 , 1.68] | Inferior by $\geq 20\%$   | 0.001  |
| 44 | [MoP] Exeter V40 Duraloc Cementless Cup                    | 671    | 1.82 | 1.28  | [ 0.26 , 2.30] | Inferior by $\geq 20\%$   | 0.014  |
| 45 | [MoP] Exeter V40 EP-Fit Plus                               | 312    | 2.98 | 2.44  | [ 0.60 , 4.29] | Inferior by $\geq 100\%$  | 0.009  |
| 46 | [MoP] Exeter V40 Elite Plus Ogee                           | 8,315  | 1.02 | 0.48  | [ 0.15 , 0.81] | Inferior by $\geq 20\%$   | 0.004  |

|    |                                                               |        |      |      |                |                           |        |
|----|---------------------------------------------------------------|--------|------|------|----------------|---------------------------|--------|
| 1  | [MoP] Exeter V40 Exceed                                       | 250    | 0.85 | 0.31 | [-0.68 , 1.30] | Non-inferiority not shown | 0.541  |
| 2  | [MoP] Exeter V40 Exeter Contemporary Flanged                  | 17,934 | 1.04 | 0.50 | [ 0.20 , 0.80] | Inferior by $\geq 20\%$   | 0.001  |
| 3  | [MoP] Exeter V40 Exeter Contemporary Hooded                   | 7,664  | 2.02 | 1.48 | [ 1.10 , 1.85] | Inferior by $\geq 100\%$  | <0.001 |
| 4  | [MoP] Exeter V40 Exeter Duration                              | 7,168  | 1.43 | 0.89 | [ 0.53 , 1.25] | Inferior by $\geq 20\%$   | <0.001 |
| 5  | [MoP] Exeter V40 Exeter X3 Rimfit                             | 550    | 0.92 | 0.38 | [-0.02 , 0.79] | Non-inferiority not shown | 0.066  |
| 6  | [MoP] Exeter V40 Marathon                                     | 364    | 1.25 | 0.71 | [-0.04 , 1.46] | Non-inferiority not shown | 0.064  |
| 7  | [MoP] Exeter V40 Opera                                        | 1,221  | 0.98 | 0.44 | [-0.10 , 0.98] | Non-inferiority not shown | 0.110  |
| 8  | [MoP] Exeter V40 Pinnacle                                     | 1,075  | 1.24 | 0.70 | [ 0.17 , 1.24] | Inferior by $\geq 20\%$   | 0.010  |
| 9  | [MoP] Exeter V40 Reflection Cementless                        | 1,164  | 1.05 | 0.51 | [-0.10 , 1.13] | Non-inferiority not shown | 0.100  |
| 10 | [MoP] Exeter V40 Trident                                      | 6,743  | 1.30 | 0.76 | [ 0.43 , 1.09] | Inferior by $\geq 20\%$   | <0.001 |
| 11 | [MoP] Exeter V40 Trilogy                                      | 4,060  | 1.24 | 0.70 | [ 0.30 , 1.10] | Inferior by $\geq 20\%$   | 0.001  |
| 12 | [MoP] Exeter V40 Ultima Cemented Cup                          | 720    | 1.90 | 1.36 | [ 0.37 , 2.35] | Inferior by $\geq 20\%$   | 0.007  |
| 13 | [MoP] Furlong Cemented Stem JRI Cemented Cup                  | 892    | 1.74 | 1.20 | [ 0.38 , 2.03] | Inferior by $\geq 20\%$   | 0.004  |
| 14 | [MoP] Furlong HAC Stem CSF                                    | 3,340  | 2.50 | 1.96 | [ 1.43 , 2.50] | Inferior by $\geq 100\%$  | <0.001 |
| 15 | [MoP] Furlong HAC Stem Furlong HAC CSF Plus                   | 1,122  | 2.75 | 2.21 | [ 1.48 , 2.94] | Inferior by $\geq 100\%$  | <0.001 |
| 16 | [MoP] Furlong HAC Stem Furlong Threaded                       | 269    | 2.84 | 2.30 | [ 0.45 , 4.15] | Inferior by $\geq 20\%$   | 0.015  |
| 17 | [MoP] MS-30 Original ME Muller Low Profile Cup                | 366    | 0.98 | 0.44 | [-0.48 , 1.36] | Non-inferiority not shown | 0.351  |
| 18 | [MoP] Muller Straight Stem Centerpulse Muller                 | 291    | 1.85 | 1.31 | [-0.18 , 2.81] | Non-inferiority not shown | 0.085  |
| 19 | [MoP] Muller Straight Stem Original ME Muller Low Profile Cup | 718    | 1.26 | 0.72 | [ 0.02 , 1.42] | Non-inferiority not shown | 0.044  |
| 20 | [MoP] Muller-Biomet Apollo                                    | 972    | 1.50 | 0.97 | [ 0.24 , 1.69] | Inferior by $\geq 20\%$   | 0.009  |
| 21 | [MoP] Muller-Biomet Original ME Muller Low Profile Cup        | 442    | 1.79 | 1.25 | [ 0.25 , 2.26] | Inferior by $\geq 20\%$   | 0.015  |
| 22 | [MoP] Omnifit Cemented Stem ODC                               | 559    | 2.23 | 1.69 | [ 0.50 , 2.87] | Inferior by $\geq 20\%$   | 0.005  |
| 23 | [MoP] SL-Plus Cementless Stem EP-Fit Plus                     | 980    | 3.12 | 2.58 | [ 1.62 , 3.54] | Inferior by $\geq 100\%$  | <0.001 |
| 24 | [MoP] SP II Cemented Stem Interplanta                         | 392    | 2.33 | 1.79 | [ 0.40 , 3.18] | Inferior by $\geq 20\%$   | 0.012  |
| 25 | [MoP] Stanmore Modular Stem Elite Plus Cemented Cup           | 273    | 1.19 | 0.65 | [-0.55 , 1.85] | Non-inferiority not shown | 0.287  |
| 26 | [MoP] Stanmore Modular Stem SHP Cup                           | 483    | 0.75 | 0.21 | [-0.45 , 0.87] | Non-inferiority not shown | 0.534  |
| 27 | [MoP] Stanmore Modular Stem Stanmore-Arcom Cup                | 2,115  | 1.69 | 1.15 | [ 0.60 , 1.70] | Inferior by $\geq 100\%$  | <0.001 |
| 28 | [MoP] Synergy Cementless Stem Reflection Cementless           | 825    | 0.91 | 0.38 | [-0.31 , 1.06] | Non-inferiority not shown | 0.284  |
| 29 | [MoP] Taperloc Cementless Stem Exceed                         | 277    | 1.84 | 1.30 | [-0.18 , 2.79] | Non-inferiority not shown | 0.086  |
| 30 | [MoP] Taperloc Cementless Stem Exceed ABT                     | 1,136  | 2.32 | 1.78 | [ 1.17 , 2.38] | Inferior by $\geq 100\%$  | <0.001 |
| 31 | [MoP] Versys Cementless Stem Trilogy                          | 462    | 4.99 | 4.45 | [ 2.56 , 6.34] | Inferior by $\geq 100\%$  | <0.001 |

## Supplemental table 2c: Difference in Kaplan-Meier failure estimate between a contemporary reference and implants with at least 250 at risk at 7 years since primary in females

| Stem/cup brand                                                | Number at risk | Cumulative failure (%) | Difference in failure (%) | 95% CI         | Equivalence status        | p-value |
|---------------------------------------------------------------|----------------|------------------------|---------------------------|----------------|---------------------------|---------|
| [MoP] Exeter V40 Elite Plus Cemented Cup                      | 1,165          | 0.76                   | [REFERENCE]               |                |                           |         |
| [CoC] ABG II Monolithic Cementless Stem ABG II Cementless Cup | 441            | 2.60                   | 1.84                      | [ 0.40 , 3.29] | Inferior by $\geq 20\%$   | 0.012   |
| [CoC] ABG II Monolithic Cementless Stem Trident               | 341            | 3.21                   | 2.45                      | [ 0.80 , 4.10] | Inferior by $\geq 100\%$  | 0.004   |
| [CoC] Accolade Trident                                        | 1,744          | 3.15                   | 2.39                      | [ 1.69 , 3.09] | Inferior by $\geq 100\%$  | <0.001  |
| [CoC] Corail Duraloc Option                                   | 466            | 3.09                   | 2.33                      | [ 0.88 , 3.79] | Inferior by $\geq 100\%$  | 0.002   |
| [CoC] Corail Pinnacle                                         | 4,397          | 2.64                   | 1.88                      | [ 1.42 , 2.34] | Inferior by $\geq 100\%$  | <0.001  |
| [CoC] Exeter V40 ABG II Cementless Cup                        | 615            | 1.55                   | 0.79                      | [-0.13 , 1.71] | Non-inferiority not shown | 0.094   |
| [CoC] Exeter V40 Trident                                      | 3,449          | 1.85                   | 1.09                      | [ 0.58 , 1.61] | Inferior by $\geq 20\%$   | <0.001  |
| [CoC] Furlong HAC Stem CSF                                    | 776            | 3.08                   | 2.32                      | [ 1.12 , 3.53] | Inferior by $\geq 100\%$  | <0.001  |
| [CoC] Furlong HAC Stem Furlong HAC CSF Plus                   | 1,170          | 2.19                   | 1.43                      | [ 0.87 , 2.00] | Inferior by $\geq 100\%$  | <0.001  |
| [CoC] SL-Plus Cementless Stem EP-Fit Plus                     | 486            | 3.61                   | 2.85                      | [ 1.32 , 4.38] | Inferior by $\geq 100\%$  | <0.001  |
| [CoC] Taperloc Cementless Stem Exceed ABT                     | 981            | 1.93                   | 1.17                      | [ 0.60 , 1.74] | Inferior by $\geq 20\%$   | <0.001  |
| [CoP] Accolade Trident                                        | 345            | 1.98                   | 1.22                      | [ 0.48 , 1.96] | Inferior by $\geq 20\%$   | 0.001   |
| [CoP] C-Stem Cemented Stem Opera                              | 274            | 1.84                   | 1.08                      | [-0.34 , 2.49] | Non-inferiority not shown | 0.135   |
| [CoP] C-Stem Cemented Stem Wroblewski Golf Ball               | 347            | 1.80                   | 1.05                      | [-0.27 , 2.37] | Non-inferiority not shown | 0.120   |
| [CoP] Corail Pinnacle                                         | 1,028          | 2.07                   | 1.32                      | [ 0.74 , 1.89] | Inferior by $\geq 20\%$   | <0.001  |
| [CoP] Corail Trilogy                                          | 310            | 1.10                   | 0.34                      | [-0.69 , 1.37] | Non-inferiority not shown | 0.513   |
| [CoP] Exeter V40 Elite Plus Ogee                              | 304            | 1.29                   | 0.54                      | [-0.41 , 1.49] | Non-inferiority not shown | 0.268   |
| [CoP] Exeter V40 Exeter Contemporary Flanged                  | 694            | 1.78                   | 1.02                      | [ 0.32 , 1.73] | Inferior by $\geq 20\%$   | 0.004   |
| [CoP] Exeter V40 Exeter Duration                              | 309            | 2.02                   | 1.26                      | [-0.12 , 2.65] | Non-inferiority not shown | 0.074   |
| [CoP] Exeter V40 Trident                                      | 656            | 1.46                   | 0.71                      | [ 0.13 , 1.28] | Non-inferiority not shown | 0.017   |
| [CoP] Exeter V40 Trilogy                                      | 723            | 1.19                   | 0.43                      | [-0.30 , 1.16] | Non-inferiority not shown | 0.249   |
| [CoP] Furlong HAC Stem CSF                                    | 2,638          | 2.37                   | 1.61                      | [ 0.99 , 2.22] | Inferior by $\geq 100\%$  | <0.001  |
| [CoP] MS-30 Original ME Muller Low Profile Cup                | 489            | 0.64                   | -0.12                     | [-0.72 , 0.48] | Non-inferiority not shown | 0.696   |
| [CoP] SL-Plus Cementless Stem EP-Fit Plus                     | 364            | 4.38                   | 3.63                      | [ 1.89 , 5.37] | Inferior by $\geq 100\%$  | <0.001  |
| [MoP] Accolade Trident                                        | 1,704          | 3.00                   | 2.25                      | [ 1.63 , 2.86] | Inferior by $\geq 100\%$  | <0.001  |
| [MoP] C-Stem AMT Cemented Stem Charnley and Elite Plus LPW    | 534            | 1.65                   | 0.89                      | [ 0.06 , 1.71] | Non-inferiority not shown | 0.035   |
| [MoP] C-Stem AMT Cemented Stem Elite Plus Ogee                | 378            | 1.98                   | 1.22                      | [ 0.17 , 2.28] | Inferior by $\geq 20\%$   | 0.023   |
| [MoP] C-Stem Cemented Stem Charnley Ogee                      | 384            | 2.49                   | 1.73                      | [ 0.41 , 3.05] | Inferior by $\geq 20\%$   | 0.010   |
| [MoP] C-Stem Cemented Stem Charnley and Elite Plus LPW        | 915            | 2.34                   | 1.58                      | [ 0.61 , 2.54] | Inferior by $\geq 20\%$   | 0.001   |
| [MoP] C-Stem Cemented Stem Duraloc Cementless Cup             | 300            | 3.44                   | 2.68                      | [ 0.86 , 4.49] | Inferior by $\geq 100\%$  | 0.004   |
| [MoP] C-Stem Cemented Stem Elite Plus Cemented Cup            | 295            | 1.05                   | 0.30                      | [-0.80 , 1.39] | Non-inferiority not shown | 0.598   |
| [MoP] C-Stem Cemented Stem Elite Plus Ogee                    | 1,198          | 1.54                   | 0.79                      | [ 0.10 , 1.47] | Non-inferiority not shown | 0.024   |
| [MoP] C-Stem Cemented Stem Opera                              | 463            | 1.66                   | 0.90                      | [-0.12 , 1.93] | Non-inferiority not shown | 0.084   |
| [MoP] C-Stem Cemented Stem Wroblewski Golf Ball               | 333            | 2.18                   | 1.42                      | [ 0.10 , 2.73] | Non-inferiority not shown | 0.034   |
| [MoP] CPS Plus Opera                                          | 279            | 2.13                   | 1.37                      | [-0.24 , 2.97] | Non-inferiority not shown | 0.095   |
| [MoP] CPT Elite Plus Ogee                                     | 741            | 2.31                   | 1.55                      | [ 0.65 , 2.45] | Inferior by $\geq 20\%$   | 0.001   |
| [MoP] CPT Trilogy                                             | 2,474          | 2.68                   | 1.92                      | [ 1.34 , 2.50] | Inferior by $\geq 100\%$  | <0.001  |
| [MoP] CPT ZCA                                                 | 2,612          | 2.46                   | 1.70                      | [ 1.15 , 2.26] | Inferior by $\geq 100\%$  | <0.001  |
| [MoP] Charnley Cemented Stem Charnley Cemented Cup            | 1,879          | 1.93                   | 1.18                      | [ 0.52 , 1.83] | Inferior by $\geq 20\%$   | <0.001  |

|    |                                                               |        |      |      |                |                           |        |
|----|---------------------------------------------------------------|--------|------|------|----------------|---------------------------|--------|
| 1  | [MoP] Charnley Cemented Stem Charnley Ogee                    | 3,746  | 1.93 | 1.18 | [ 0.65 , 1.70] | Inferior by $\geq 20\%$   | <0.001 |
| 2  | [MoP] Charnley Cemented Stem Charnley and Elite Plus LPW      | 2,920  | 1.35 | 0.59 | [ 0.08 , 1.11] | Non-inferiority not shown | 0.024  |
| 3  | [MoP] Charnley Cemented Stem Opera                            | 496    | 2.12 | 1.37 | [ 0.26 , 2.47] | Inferior by $\geq 20\%$   | 0.015  |
| 4  | [MoP] Charnley Cemented Stem Wroblewski Golf Ball             | 404    | 1.73 | 0.97 | [-0.11 , 2.05] | Non-inferiority not shown | 0.079  |
| 5  | [MoP] Corail Duraloc Cementless Cup                           | 1,695  | 3.25 | 2.49 | [ 1.65 , 3.34] | Inferior by $\geq 100\%$  | <0.001 |
| 6  | [MoP] Corail Elite Plus Cemented Cup                          | 322    | 1.46 | 0.70 | [-0.39 , 1.79] | Non-inferiority not shown | 0.208  |
| 7  | [MoP] Corail Elite Plus Ogee                                  | 456    | 1.85 | 1.09 | [ 0.16 , 2.03] | Inferior by $\geq 20\%$   | 0.022  |
| 8  | [MoP] Corail Pinnacle                                         | 4,975  | 2.01 | 1.25 | [ 0.82 , 1.68] | Inferior by $\geq 100\%$  | <0.001 |
| 9  | [MoP] Corail Trilogy                                          | 533    | 1.87 | 1.11 | [ 0.14 , 2.08] | Non-inferiority not shown | 0.025  |
| 10 | [MoP] Elite Plus Cemented Stem Elite Plus Ogee                | 329    | 1.26 | 0.50 | [-0.66 , 1.67] | Non-inferiority not shown | 0.394  |
| 11 | [MoP] Exeter V40 ABG II Cementless Cup                        | 416    | 1.25 | 0.49 | [-0.57 , 1.55] | Non-inferiority not shown | 0.365  |
| 12 | [MoP] Exeter V40 Cenator Cemented Cup                         | 860    | 2.22 | 1.46 | [ 0.62 , 2.30] | Inferior by $\geq 20\%$   | 0.001  |
| 13 | [MoP] Exeter V40 Charnley Ogee                                | 721    | 1.39 | 0.64 | [-0.14 , 1.41] | Non-inferiority not shown | 0.108  |
| 14 | [MoP] Exeter V40 Charnley and Elite Plus LPW                  | 788    | 1.99 | 1.23 | [ 0.48 , 1.99] | Inferior by $\geq 20\%$   | 0.001  |
| 15 | [MoP] Exeter V40 Duraloc Cementless Cup                       | 507    | 2.12 | 1.37 | [ 0.24 , 2.49] | Inferior by $\geq 20\%$   | 0.017  |
| 16 | [MoP] Exeter V40 EP-Fit Plus                                  | 268    | 3.64 | 2.88 | [ 0.82 , 4.94] | Inferior by $\geq 100\%$  | 0.006  |
| 17 | [MoP] Exeter V40 Elite Plus Ogee                              | 5,848  | 1.40 | 0.65 | [ 0.21 , 1.08] | Inferior by $\geq 20\%$   | 0.004  |
| 18 | [MoP] Exeter V40 Exeter Contemporary Flanged                  | 11,143 | 1.36 | 0.60 | [ 0.20 , 1.00] | Inferior by $\geq 20\%$   | 0.003  |
| 19 | [MoP] Exeter V40 Exeter Contemporary Hooded                   | 4,810  | 2.77 | 2.01 | [ 1.52 , 2.51] | Inferior by $\geq 100\%$  | <0.001 |
| 20 | [MoP] Exeter V40 Exeter Duration                              | 5,153  | 2.05 | 1.29 | [ 0.81 , 1.77] | Inferior by $\geq 100\%$  | <0.001 |
| 21 | [MoP] Exeter V40 Opera                                        | 805    | 1.35 | 0.59 | [-0.10 , 1.29] | Non-inferiority not shown | 0.095  |
| 22 | [MoP] Exeter V40 Pinnacle                                     | 507    | 1.45 | 0.69 | [ 0.04 , 1.35] | Non-inferiority not shown | 0.038  |
| 23 | [MoP] Exeter V40 Reflection Cementless                        | 877    | 1.73 | 0.97 | [ 0.14 , 1.80] | Non-inferiority not shown | 0.022  |
| 24 | [MoP] Exeter V40 Trident                                      | 3,625  | 1.74 | 0.99 | [ 0.53 , 1.44] | Inferior by $\geq 20\%$   | <0.001 |
| 25 | [MoP] Exeter V40 Trilogy                                      | 2,694  | 1.53 | 0.77 | [ 0.27 , 1.28] | Inferior by $\geq 20\%$   | 0.003  |
| 26 | [MoP] Exeter V40 Ultima Cemented Cup                          | 635    | 2.04 | 1.28 | [ 0.22 , 2.33] | Inferior by $\geq 20\%$   | 0.018  |
| 27 | [MoP] Furlong Cemented Stem JRI Cemented Cup                  | 730    | 2.09 | 1.33 | [ 0.39 , 2.28] | Inferior by $\geq 20\%$   | 0.006  |
| 28 | [MoP] Furlong HAC Stem CSF                                    | 2,586  | 3.04 | 2.28 | [ 1.64 , 2.92] | Inferior by $\geq 100\%$  | <0.001 |
| 29 | [MoP] Furlong HAC Stem Furlong HAC CSF Plus                   | 469    | 3.16 | 2.40 | [ 1.53 , 3.27] | Inferior by $\geq 100\%$  | <0.001 |
| 30 | [MoP] Muller Straight Stem Original ME Muller Low Profile Cup | 474    | 2.09 | 1.33 | [ 0.29 , 2.37] | Inferior by $\geq 20\%$   | 0.012  |
| 31 | [MoP] Muller-Biomet Apollo                                    | 714    | 1.85 | 1.09 | [ 0.23 , 1.95] | Inferior by $\geq 20\%$   | 0.013  |
| 32 | [MoP] Omnifit Cemented Stem ODC                               | 495    | 3.36 | 2.60 | [ 1.10 , 4.10] | Inferior by $\geq 100\%$  | 0.001  |
| 33 | [MoP] SL-Plus Cementless Stem EP-Fit Plus                     | 750    | 3.80 | 3.04 | [ 1.92 , 4.16] | Inferior by $\geq 100\%$  | <0.001 |
| 34 | [MoP] SP II Cemented Stem Interplanta                         | 326    | 2.88 | 2.12 | [ 0.52 , 3.72] | Inferior by $\geq 20\%$   | 0.009  |
| 35 | [MoP] Stanmore Modular Stem SHP Cup                           | 352    | 1.24 | 0.48 | [-0.50 , 1.46] | Non-inferiority not shown | 0.338  |
| 36 | [MoP] Stanmore Modular Stem Stanmore-Arcom Cup                | 1,379  | 2.01 | 1.25 | [ 0.59 , 1.90] | Inferior by $\geq 20\%$   | <0.001 |
| 37 | [MoP] Synergy Cementless Stem Reflection Cementless           | 607    | 1.33 | 0.57 | [-0.30 , 1.44] | Non-inferiority not shown | 0.196  |
| 38 | [MoP] Taperloc Cementless Stem Exceed ABT                     | 346    | 2.99 | 2.24 | [ 1.34 , 3.13] | Inferior by $\geq 100\%$  | <0.001 |
| 39 | [MoP] Versys Cementless Stem Trilogy                          | 418    | 4.99 | 4.23 | [ 2.32 , 6.14] | Inferior by $\geq 100\%$  | <0.001 |

**Supplemental table 2d: Difference in Kaplan-Meier failure estimate between a contemporary reference and implants with at least 250 at risk at 10 years since primary in females**

| Stem/cup brand                                                | Number at risk | Cumulative failure (%) | Difference in failure (%) | 95% CI          | Equivalence status        | p-value |
|---------------------------------------------------------------|----------------|------------------------|---------------------------|-----------------|---------------------------|---------|
| [MoP] Exeter V40 Elite Plus Ogee                              | 2,475          | 1.95                   | [REFERENCE]               |                 |                           |         |
| [CoC] ABG II Monolithic Cementless Stem ABG II Cementless Cup | 347            | 3.34                   | 1.38                      | [-0.27 , 3.03]  | Non-inferiority not shown | 0.100   |
| [CoC] Accolade Trident                                        | 255            | 4.07                   | 2.11                      | [ 1.17 , 3.05]  | Inferior by $\geq 20\%$   | <0.001  |
| [CoC] Corail Pinnacle                                         | 523            | 3.61                   | 1.65                      | [ 1.01 , 2.30]  | Inferior by $\geq 20\%$   | <0.001  |
| [CoC] Exeter V40 ABG II Cementless Cup                        | 302            | 2.63                   | 0.67                      | [-0.64 , 1.98]  | Non-inferiority not shown | 0.317   |
| [CoC] Exeter V40 Trident                                      | 1,079          | 2.45                   | 0.50                      | [-0.11 , 1.11]  | Non-inferiority not shown | 0.106   |
| [CoC] Furlong HAC Stem CSF                                    | 470            | 4.44                   | 2.49                      | [ 1.01 , 3.97]  | Inferior by $\geq 20\%$   | 0.001   |
| [CoP] Exeter V40 Trilogy                                      | 300            | 1.58                   | -0.37                     | [-1.28 , 0.53]  | Non-inferiority not shown | 0.417   |
| [CoP] Furlong HAC Stem CSF                                    | 1,467          | 3.08                   | 1.12                      | [ 0.42 , 1.82]  | Inferior by $\geq 20\%$   | 0.002   |
| [MoP] C-Stem Cemented Stem Charnley and Elite Plus LPW        | 534            | 2.79                   | 0.84                      | [-0.21 , 1.88]  | Non-inferiority not shown | 0.117   |
| [MoP] C-Stem Cemented Stem Elite Plus Ogee                    | 570            | 2.48                   | 0.53                      | [-0.41 , 1.46]  | Non-inferiority not shown | 0.271   |
| [MoP] CPT Elite Plus Ogee                                     | 256            | 2.80                   | 0.85                      | [-0.31 , 2.01]  | Non-inferiority not shown | 0.151   |
| [MoP] CPT Trilogy                                             | 754            | 4.11                   | 2.16                      | [ 1.31 , 3.01]  | Inferior by $\geq 20\%$   | <0.001  |
| [MoP] CPT ZCA                                                 | 903            | 3.43                   | 1.48                      | [ 0.76 , 2.19]  | Inferior by $\geq 20\%$   | <0.001  |
| [MoP] Charnley Cemented Stem Charnley Cemented Cup            | 1,136          | 2.83                   | 0.88                      | [ 0.10 , 1.66]  | Non-inferiority not shown | 0.027   |
| [MoP] Charnley Cemented Stem Charnley Ogee                    | 1,951          | 3.23                   | 1.28                      | [ 0.63 , 1.92]  | Inferior by $\geq 20\%$   | <0.001  |
| [MoP] Charnley Cemented Stem Charnley and Elite Plus LPW      | 1,623          | 2.23                   | 0.28                      | [-0.34 , 0.90]  | Non-inferiority not shown | 0.376   |
| [MoP] Charnley Cemented Stem Wroblewski Golf Ball             | 252            | 2.62                   | 0.67                      | [-0.81 , 2.14]  | Non-inferiority not shown | 0.375   |
| [MoP] Corail Duraloc Cementless Cup                           | 783            | 4.61                   | 2.66                      | [ 1.62 , 3.70]  | Inferior by $\geq 20\%$   | <0.001  |
| [MoP] Corail Pinnacle                                         | 1,043          | 2.78                   | 0.83                      | [ 0.28 , 1.38]  | Non-inferiority not shown | 0.003   |
| [MoP] Exeter V40 ABG II Cementless Cup                        | 279            | 1.55                   | -0.40                     | [-1.60 , 0.80]  | Non-inferiority not shown | 0.515   |
| [MoP] Exeter V40 Cenator Cemented Cup                         | 468            | 2.50                   | 0.55                      | [-0.36 , 1.45]  | Non-inferiority not shown | 0.239   |
| [MoP] Exeter V40 Charnley Ogee                                | 434            | 1.39                   | -0.56                     | [-1.32 , 0.20]  | Non-inferior              | 0.146   |
| [MoP] Exeter V40 Charnley and Elite Plus LPW                  | 292            | 2.60                   | 0.65                      | [-0.30 , 1.60]  | Non-inferiority not shown | 0.180   |
| [MoP] Exeter V40 Duraloc Cementless Cup                       | 301            | 3.88                   | 1.92                      | [ 0.23 , 3.62]  | Non-inferiority not shown | 0.026   |
| [MoP] Exeter V40 Elite Plus Cemented Cup                      | 480            | 1.04                   | -0.91                     | [-1.55 , -0.28] | Non-inferior              | 0.005   |
| [MoP] Exeter V40 Exeter Contemporary Flanged                  | 3,136          | 1.98                   | 0.02                      | [-0.39 , 0.43]  | Non-inferiority not shown | 0.919   |
| [MoP] Exeter V40 Exeter Contemporary Hooded                   | 1,595          | 4.09                   | 2.14                      | [ 1.52 , 2.75]  | Inferior by $\geq 20\%$   | <0.001  |
| [MoP] Exeter V40 Exeter Duration                              | 2,079          | 3.16                   | 1.21                      | [ 0.64 , 1.78]  | Inferior by $\geq 20\%$   | <0.001  |
| [MoP] Exeter V40 Opera                                        | 315            | 2.79                   | 0.83                      | [-0.44 , 2.11]  | Non-inferiority not shown | 0.200   |
| [MoP] Exeter V40 Trident                                      | 714            | 2.63                   | 0.68                      | [ 0.06 , 1.29]  | Non-inferiority not shown | 0.031   |
| [MoP] Exeter V40 Trilogy                                      | 955            | 2.15                   | 0.20                      | [-0.40 , 0.80]  | Non-inferiority not shown | 0.518   |
| [MoP] Exeter V40 Ultima Cemented Cup                          | 334            | 2.65                   | 0.70                      | [-0.55 , 1.94]  | Non-inferiority not shown | 0.275   |
| [MoP] Furlong Cemented Stem JRI Cemented Cup                  | 413            | 3.49                   | 1.53                      | [ 0.20 , 2.87]  | Non-inferiority not shown | 0.024   |
| [MoP] Furlong HAC Stem CSF                                    | 1,088          | 4.21                   | 2.25                      | [ 1.46 , 3.04]  | Inferior by $\geq 20\%$   | <0.001  |
| [MoP] Muller-Biomet Apollo                                    | 256            | 2.18                   | 0.23                      | [-0.84 , 1.30]  | Non-inferiority not shown | 0.673   |
| [MoP] Omnifit Cemented Stem ODC                               | 321            | 4.49                   | 2.54                      | [ 0.76 , 4.32]  | Inferior by $\geq 20\%$   | 0.005   |
| [MoP] Stanmore Modular Stem Stanmore-Arcom Cup                | 489            | 2.78                   | 0.83                      | [-0.01 , 1.66]  | Non-inferiority not shown | 0.052   |
| [MoP] Versys Cementless Stem Trilogy                          | 263            | 5.52                   | 3.57                      | [ 1.54 , 5.60]  | Inferior by $\geq 20\%$   | 0.001   |

1  
2  
3  
4  
5  
6  
7  
8  
9  
10  
11  
12  
13  
14  
15  
16  
17  
18  
19  
20  
21  
22  
23  
24  
25  
26  
27  
28  
29  
30  
31  
32  
33  
34  
35  
36  
37  
38  
39  
40  
41  
42  
43  
44  
45  
46

For peer review only

**Supplemental table 3a: Difference in Kaplan-Meier failure estimate between a contemporary reference and implants with at least 250 at risk at 3 years since primary in females <55 years**

| Stem/cup brand                               | Number at risk | Cumulative failure (%) | Difference in failure (%) | 95% CI         | Equivalence status        | p-value |
|----------------------------------------------|----------------|------------------------|---------------------------|----------------|---------------------------|---------|
| [CoC] Exeter V40 Trident                     | 1,785          | 0.79                   | [REFERENCE]               |                |                           |         |
| [CoC] Accolade Trident                       | 865            | 2.12                   | 1.33                      | [ 0.33 , 2.33] | Inferior by $\geq 20\%$   | 0.009   |
| [CoC] Corail DeltaMotion                     | 342            | 1.53                   | 0.74                      | [-0.54 , 2.02] | Non-inferiority not shown | 0.256   |
| [CoC] Corail Pinnacle                        | 4,110          | 2.15                   | 1.36                      | [ 0.81 , 1.92] | Inferior by $\geq 100\%$  | <0.001  |
| [CoC] Furlong HAC Stem Furlong HAC CSF Plus  | 969            | 1.57                   | 0.78                      | [-0.01 , 1.57] | Non-inferiority not shown | 0.052   |
| [CoC] M/L Taper Cementless Continuum         | 324            | 1.22                   | 0.43                      | [-0.70 , 1.57] | Non-inferiority not shown | 0.456   |
| [CoC] Taperloc Cementless Stem Exceed ABT    | 964            | 1.23                   | 0.44                      | [-0.27 , 1.16] | Non-inferiority not shown | 0.225   |
| [CoP] Accolade Trident                       | 313            | 1.01                   | 0.22                      | [-0.67 , 1.12] | Non-inferiority not shown | 0.629   |
| [CoP] C-Stem Cemented Stem Marathon          | 251            | 1.23                   | 0.44                      | [-0.71 , 1.58] | Non-inferiority not shown | 0.457   |
| [CoP] Corail Pinnacle                        | 720            | 1.95                   | 1.16                      | [ 0.31 , 2.00] | Inferior by $\geq 20\%$   | 0.007   |
| [CoP] Exeter V40 Exeter X3 Rimfit            | 309            | 1.29                   | 0.50                      | [-0.55 , 1.56] | Non-inferiority not shown | 0.351   |
| [CoP] Exeter V40 Trident                     | 493            | 1.06                   | 0.27                      | [-0.51 , 1.05] | Non-inferiority not shown | 0.501   |
| [CoP] Furlong HAC Stem CSF                   | 259            | 1.81                   | 1.02                      | [-0.60 , 2.64] | Non-inferiority not shown | 0.217   |
| [MoP] Accolade Trident                       | 256            | 1.87                   | 1.08                      | [-0.45 , 2.61] | Non-inferiority not shown | 0.168   |
| [MoP] Corail Pinnacle                        | 594            | 1.73                   | 0.94                      | [-0.05 , 1.93] | Non-inferiority not shown | 0.062   |
| [MoP] Exeter V40 Exeter Contemporary Flanged | 366            | 0.56                   | -0.23                     | [-0.97 , 0.50] | Non-inferiority not shown | 0.535   |
| [MoP] Exeter V40 Trident                     | 344            | 1.05                   | 0.26                      | [-0.74 , 1.27] | Non-inferiority not shown | 0.610   |

Supplemental table 3b: Difference in Kaplan-Meier failure estimate between a contemporary reference and implants with at least 250 at risk at 5 years since primary in females <55 years

| Stem/cup brand                               | Number at risk | Cumulative failure (%) | Difference in failure (%) | 95% CI         | Equivalence status        | p-value |
|----------------------------------------------|----------------|------------------------|---------------------------|----------------|---------------------------|---------|
| [CoC] Exeter V40 Trident                     | 1,426          | 1.17                   | [REFERENCE]               |                |                           |         |
| [CoC] Accolade Trident                       | 669            | 2.64                   | 1.47                      | [ 0.31 , 2.62] | Inferior by $\geq 20\%$   | 0.013   |
| [CoC] Corail Pinnacle                        | 2,754          | 2.93                   | 1.76                      | [ 1.07 , 2.45] | Inferior by $\geq 20\%$   | <0.001  |
| [CoC] Furlong HAC Stem Furlong HAC CSF Plus  | 610            | 1.82                   | 0.65                      | [-0.26 , 1.57] | Non-inferiority not shown | 0.161   |
| [CoC] Taperloc Cementless Stem Exceed ABT    | 557            | 2.05                   | 0.88                      | [-0.11 , 1.86] | Non-inferiority not shown | 0.080   |
| [CoP] Corail Pinnacle                        | 369            | 2.59                   | 1.42                      | [ 0.33 , 2.52] | Inferior by $\geq 20\%$   | 0.011   |
| [MoP] Corail Pinnacle                        | 365            | 2.65                   | 1.48                      | [ 0.18 , 2.78] | Non-inferiority not shown | 0.026   |
| [MoP] Exeter V40 Exeter Contemporary Flanged | 279            | 1.81                   | 0.64                      | [-0.82 , 2.10] | Non-inferiority not shown | 0.391   |



**Supplemental table 3c: Difference in Kaplan-Meier failure estimate between a contemporary reference and implants with at least 250 at risk at 7 years since primary in females <55 years**

| Stem/cup brand           | Number at risk | Cumulative failure (%) | Difference in failure (%) | 95% CI          | Equivalence status        | p-value |
|--------------------------|----------------|------------------------|---------------------------|-----------------|---------------------------|---------|
| [CoC] Corail Pinnacle    | 1,321          | 3.60                   | [REFERENCE]               |                 |                           |         |
| [CoC] Accolade Trident   | 370            | 3.66                   | 0.06                      | [-1.38 , 1.51]  | Non-inferiority not shown | 0.930   |
| [CoC] Exeter V40 Trident | 982            | 2.07                   | -1.53                     | [-2.47 , -0.60] | Non-inferior              | 0.001   |

For peer review only

**Supplemental table 4a: Difference in Kaplan-Meier failure estimate between a contemporary reference and implants with at least 250 at risk at 3 years since primary in females between 55 and 75 years**

| Stem/cup brand                                                | Number at risk | Cumulative failure (%) | Difference in failure (%) | 95% CI         | Equivalence status        | p-value |
|---------------------------------------------------------------|----------------|------------------------|---------------------------|----------------|---------------------------|---------|
| [MoP] Exeter V40 Elite Plus Cemented Cup                      | 1,360          | 0.44                   | [REFERENCE]               |                |                           |         |
| [CoC] ABG II Monolithic Cementless Stem ABG II Cementless Cup | 375            | 1.57                   | 1.13                      | [-0.16 , 2.42] | Non-inferiority not shown | 0.087   |
| [CoC] ABG II Monolithic Cementless Stem Trident               | 325            | 2.05                   | 1.61                      | [ 0.07 , 3.14] | Non-inferiority not shown | 0.041   |
| [CoC] Accolade Trident                                        | 2,547          | 1.62                   | 1.18                      | [ 0.60 , 1.75] | Inferior by $\geq 100\%$  | <0.001  |
| [CoC] Bimetric Cementless Stem Exceed ABT                     | 407            | 1.48                   | 1.04                      | [-0.10 , 2.17] | Non-inferiority not shown | 0.074   |
| [CoC] C-Stem AMT Cemented Stem Pinnacle                       | 368            | 1.00                   | 0.56                      | [-0.38 , 1.50] | Non-inferiority not shown | 0.245   |
| [CoC] CPT Continuum                                           | 275            | 0.90                   | 0.45                      | [-0.61 , 1.52] | Non-inferiority not shown | 0.405   |
| [CoC] Corail Delta TT                                         | 293            | 2.02                   | 1.58                      | [ 0.29 , 2.86] | Inferior by $\geq 20\%$   | 0.016   |
| [CoC] Corail DeltaMotion                                      | 347            | 0.95                   | 0.51                      | [-0.48 , 1.50] | Non-inferiority not shown | 0.312   |
| [CoC] Corail Duraloc Option                                   | 382            | 1.52                   | 1.08                      | [-0.17 , 2.33] | Non-inferiority not shown | 0.092   |
| [CoC] Corail Pinnacle                                         | 9,567          | 1.41                   | 0.97                      | [ 0.57 , 1.36] | Inferior by $\geq 100\%$  | <0.001  |
| [CoC] Excia Cementless Plasmacup SC                           | 325            | 1.03                   | 0.58                      | [-0.48 , 1.64] | Non-inferiority not shown | 0.281   |
| [CoC] Exeter V40 ABG II Cementless Cup                        | 640            | 0.41                   | -0.03                     | [-0.60 , 0.54] | Non-inferiority not shown | 0.909   |
| [CoC] Exeter V40 Trident                                      | 3,977          | 0.95                   | 0.50                      | [ 0.07 , 0.94] | Non-inferiority not shown | 0.024   |
| [CoC] Furlong HAC Stem CSF                                    | 620            | 1.73                   | 1.28                      | [ 0.22 , 2.34] | Inferior by $\geq 20\%$   | 0.018   |
| [CoC] Furlong HAC Stem Furlong HAC CSF Plus                   | 3,449          | 1.59                   | 1.15                      | [ 0.66 , 1.63] | Inferior by $\geq 100\%$  | <0.001  |
| [CoC] M/L Taper Cementless Continuum                          | 363            | 1.61                   | 1.16                      | [ 0.01 , 2.32] | Non-inferiority not shown | 0.048   |
| [CoC] Metafix Stem Trinity                                    | 290            | 1.39                   | 0.94                      | [-0.16 , 2.04] | Non-inferiority not shown | 0.093   |
| [CoC] Polarstem Cementless R3 Cementless                      | 370            | 0.84                   | 0.40                      | [-0.49 , 1.29] | Non-inferiority not shown | 0.377   |
| [CoC] SL-Plus Cementless Stem EP-Fit Plus                     | 376            | 1.53                   | 1.09                      | [-0.17 , 2.34] | Non-inferiority not shown | 0.091   |
| [CoC] Taperloc Cementless Stem Exceed ABT                     | 2,580          | 1.46                   | 1.01                      | [ 0.50 , 1.53] | Inferior by $\geq 100\%$  | <0.001  |
| [CoP] Accolade Trident                                        | 1,324          | 1.44                   | 0.99                      | [ 0.36 , 1.63] | Inferior by $\geq 20\%$   | 0.002   |
| [CoP] C-Stem Cemented Stem Elite Plus Ogee                    | 279            | 0.35                   | -0.09                     | [-0.85 , 0.66] | Non-inferiority not shown | 0.807   |
| [CoP] C-Stem Cemented Stem Marathon                           | 364            | 0.59                   | 0.15                      | [-0.62 , 0.91] | Non-inferiority not shown | 0.706   |
| [CoP] C-Stem Cemented Stem Opera                              | 295            | 0.00                   | --                        | [ -- , -- ]    | No failures to date       |         |
| [CoP] C-Stem Cemented Stem Wroblewski Golf Ball               | 346            | 0.53                   | 0.08                      | [-0.72 , 0.89] | Non-inferiority not shown | 0.836   |
| [CoP] CPT Trilogy                                             | 573            | 1.20                   | 0.75                      | [ 0.13 , 1.38] | Inferior by $\geq 20\%$   | 0.018   |
| [CoP] Corail Charnley and Elite Plus LPW                      | 296            | 2.41                   | 1.97                      | [ 0.28 , 3.65] | Inferior by $\geq 20\%$   | 0.022   |
| [CoP] Corail Marathon                                         | 559            | 0.73                   | 0.29                      | [-0.35 , 0.93] | Non-inferiority not shown | 0.378   |
| [CoP] Corail Pinnacle                                         | 3,489          | 1.19                   | 0.75                      | [ 0.33 , 1.17] | Inferior by $\geq 20\%$   | <0.001  |
| [CoP] Corail Trilogy                                          | 355            | 0.81                   | 0.37                      | [-0.60 , 1.34] | Non-inferiority not shown | 0.460   |
| [CoP] Exeter V40 Charnley and Elite Plus LPW                  | 355            | 1.69                   | 1.24                      | [ 0.03 , 2.45] | Non-inferiority not shown | 0.044   |
| [CoP] Exeter V40 Elite Plus Ogee                              | 529            | 0.70                   | 0.26                      | [-0.44 , 0.95] | Non-inferiority not shown | 0.468   |
| [CoP] Exeter V40 Exeter Contemporary Flanged                  | 1,464          | 1.06                   | 0.62                      | [ 0.05 , 1.18] | Non-inferiority not shown | 0.032   |
| [CoP] Exeter V40 Exeter Contemporary Hooded                   | 376            | 1.55                   | 1.11                      | [-0.08 , 2.30] | Non-inferiority not shown | 0.068   |
| [CoP] Exeter V40 Exeter Duration                              | 369            | 0.98                   | 0.54                      | [-0.48 , 1.55] | Non-inferiority not shown | 0.299   |
| [CoP] Exeter V40 Exeter X3 Rimfit                             | 896            | 0.66                   | 0.22                      | [-0.27 , 0.70] | Non-inferiority not shown | 0.385   |
| [CoP] Exeter V40 Trident                                      | 2,023          | 1.02                   | 0.57                      | [ 0.12 , 1.03] | Inferior by $\geq 20\%$   | 0.014   |
| [CoP] Exeter V40 Trilogy                                      | 896            | 0.61                   | 0.16                      | [-0.42 , 0.75] | Non-inferiority not shown | 0.587   |
| [CoP] Furlong HAC Stem CSF                                    | 2,797          | 1.29                   | 0.85                      | [ 0.33 , 1.37] | Inferior by $\geq 20\%$   | 0.001   |

|    |                                                            |        |      |       |                |                           |        |
|----|------------------------------------------------------------|--------|------|-------|----------------|---------------------------|--------|
| 1  | [CoP] Furlong HAC Stem Furlong HAC CSF Plus                | 660    | 2.00 | 1.56  | [ 0.58 , 2.54] | Inferior by $\geq 100\%$  | 0.002  |
| 2  | [CoP] MS-30 Original ME Muller Low Profile Cup             | 785    | 0.57 | 0.13  | [-0.47 , 0.73] | Non-inferiority not shown | 0.674  |
| 3  | [CoP] SL-Plus Cementless Stem EP-Fit Plus                  | 368    | 1.82 | 1.38  | [-0.00 , 2.75] | Non-inferiority not shown | 0.050  |
| 4  | [CoP] Taperloc Cementless Stem Exceed ABT                  | 789    | 1.04 | 0.60  | [-0.03 , 1.22] | Non-inferiority not shown | 0.062  |
| 5  | [MoP] Accolade Trident                                     | 3,609  | 1.81 | 1.36  | [ 0.84 , 1.89] | Inferior by $\geq 100\%$  | <0.001 |
| 6  | [MoP] Anthology R3 Cementless                              | 506    | 1.00 | 0.56  | [-0.18 , 1.29] | Non-inferiority not shown | 0.138  |
| 7  | [MoP] C-Stem AMT Cemented Stem Charnley and Elite Plus LPW | 779    | 0.76 | 0.32  | [-0.34 , 0.97] | Non-inferiority not shown | 0.341  |
| 8  | [MoP] C-Stem AMT Cemented Stem Elite Plus Ogee             | 482    | 0.79 | 0.35  | [-0.43 , 1.12] | Non-inferiority not shown | 0.380  |
| 9  | [MoP] C-Stem AMT Cemented Stem Marathon                    | 406    | 1.09 | 0.65  | [-0.12 , 1.42] | Non-inferiority not shown | 0.099  |
| 10 | [MoP] C-Stem AMT Cemented Stem Pinnacle                    | 609    | 1.05 | 0.60  | [-0.07 , 1.27] | Non-inferiority not shown | 0.077  |
| 11 | [MoP] C-Stem Cemented Stem Charnley Ogee                   | 400    | 1.80 | 1.35  | [ 0.07 , 2.64] | Non-inferiority not shown | 0.038  |
| 12 | [MoP] C-Stem Cemented Stem Charnley and Elite Plus LPW     | 727    | 1.04 | 0.60  | [-0.19 , 1.39] | Non-inferiority not shown | 0.138  |
| 13 | [MoP] C-Stem Cemented Stem Duraloc Cementless Cup          | 298    | 1.64 | 1.20  | [-0.27 , 2.67] | Non-inferiority not shown | 0.109  |
| 14 | [MoP] C-Stem Cemented Stem Elite Plus Ogee                 | 1,130  | 0.91 | 0.47  | [-0.14 , 1.08] | Non-inferiority not shown | 0.132  |
| 15 | [MoP] C-Stem Cemented Stem Marathon                        | 616    | 0.67 | 0.22  | [-0.37 , 0.82] | Non-inferiority not shown | 0.461  |
| 16 | [MoP] C-Stem Cemented Stem Opera                           | 541    | 0.71 | 0.26  | [-0.50 , 1.03] | Non-inferiority not shown | 0.500  |
| 17 | [MoP] C-Stem Cemented Stem Wroblewski Golf Ball            | 397    | 0.48 | 0.04  | [-0.71 , 0.78] | Non-inferiority not shown | 0.925  |
| 18 | [MoP] CCA Cemented Stem CCB Cup                            | 457    | 0.34 | -0.10 | [-0.68 , 0.47] | Non-inferiority not shown | 0.728  |
| 19 | [MoP] CLS Cementless Stem Allofit                          | 259    | 1.45 | 1.01  | [-0.44 , 2.46] | Non-inferiority not shown | 0.174  |
| 20 | [MoP] CPCS Opera                                           | 488    | 1.19 | 0.75  | [-0.26 , 1.75] | Non-inferiority not shown | 0.145  |
| 21 | [MoP] CPT Allofit                                          | 386    | 0.16 | -0.28 | [-0.74 , 0.17] | Non-inferiority not shown | 0.220  |
| 22 | [MoP] CPT Elite Plus Ogee                                  | 922    | 1.28 | 0.84  | [ 0.07 , 1.61] | Non-inferiority not shown | 0.032  |
| 23 | [MoP] CPT Original ME Muller Low Profile Cup               | 324    | 0.92 | 0.48  | [-0.48 , 1.44] | Non-inferiority not shown | 0.329  |
| 24 | [MoP] CPT Pinnacle                                         | 290    | 0.64 | 0.20  | [-0.75 , 1.15] | Non-inferiority not shown | 0.680  |
| 25 | [MoP] CPT Trabecular Metal Modular Cementless Cup          | 317    | 2.73 | 2.29  | [ 0.72 , 3.86] | Inferior by $\geq 100\%$  | 0.004  |
| 26 | [MoP] CPT Trilogy                                          | 3,394  | 1.23 | 0.79  | [ 0.32 , 1.26] | Inferior by $\geq 20\%$   | 0.001  |
| 27 | [MoP] CPT ZCA                                              | 2,305  | 1.24 | 0.79  | [ 0.28 , 1.31] | Inferior by $\geq 20\%$   | 0.003  |
| 28 | [MoP] Charnley Cemented Stem Charnley Cemented Cup         | 1,559  | 0.98 | 0.54  | [-0.04 , 1.12] | Non-inferiority not shown | 0.069  |
| 29 | [MoP] Charnley Cemented Stem Charnley Ogee                 | 3,266  | 1.18 | 0.73  | [ 0.25 , 1.22] | Inferior by $\geq 20\%$   | 0.003  |
| 30 | [MoP] Charnley Cemented Stem Charnley and Elite Plus LPW   | 2,255  | 0.68 | 0.23  | [-0.24 , 0.70] | Non-inferiority not shown | 0.331  |
| 31 | [MoP] Charnley Cemented Stem Opera                         | 498    | 0.39 | -0.05 | [-0.69 , 0.58] | Non-inferiority not shown | 0.868  |
| 32 | [MoP] Charnley Cemented Stem Wroblewski Golf Ball          | 333    | 1.43 | 0.98  | [-0.30 , 2.27] | Non-inferiority not shown | 0.134  |
| 33 | [MoP] Corail Charnley and Elite Plus LPW                   | 334    | 0.23 | -0.21 | [-0.77 , 0.35] | Non-inferiority not shown | 0.454  |
| 34 | [MoP] Corail Duraloc Cementless Cup                        | 1,523  | 1.59 | 1.14  | [ 0.44 , 1.84] | Inferior by $\geq 20\%$   | 0.001  |
| 35 | [MoP] Corail Elite Plus Cemented Cup                       | 354    | 0.25 | -0.20 | [-0.78 , 0.39] | Non-inferiority not shown | 0.510  |
| 36 | [MoP] Corail Elite Plus Ogee                               | 546    | 1.03 | 0.58  | [-0.24 , 1.41] | Non-inferiority not shown | 0.167  |
| 37 | [MoP] Corail Marathon                                      | 1,156  | 0.74 | 0.30  | [-0.21 , 0.80] | Non-inferiority not shown | 0.246  |
| 38 | [MoP] Corail Pinnacle                                      | 11,626 | 1.15 | 0.71  | [ 0.34 , 1.08] | Inferior by $\geq 20\%$   | <0.001 |
| 39 | [MoP] Corail Trilogy                                       | 680    | 0.78 | 0.34  | [-0.37 , 1.04] | Non-inferiority not shown | 0.350  |
| 40 | [MoP] Exeter V40 ABG II Cementless Cup                     | 288    | 1.01 | 0.56  | [-0.62 , 1.74] | Non-inferiority not shown | 0.351  |
| 41 | [MoP] Exeter V40 Cenator Cemented Cup                      | 721    | 1.68 | 1.24  | [ 0.27 , 2.20] | Inferior by $\geq 20\%$   | 0.012  |
| 42 | [MoP] Exeter V40 Charnley Ogee                             | 658    | 1.07 | 0.63  | [-0.18 , 1.44] | Non-inferiority not shown | 0.129  |
| 43 | [MoP] Exeter V40 Charnley and Elite Plus LPW               | 943    | 1.27 | 0.82  | [ 0.11 , 1.54] | Inferior by $\geq 20\%$   | 0.025  |
| 44 | [MoP] Exeter V40 Duraloc Cementless Cup                    | 509    | 0.77 | 0.33  | [-0.49 , 1.15] | Non-inferiority not shown | 0.437  |
| 45 | [MoP] Exeter V40 EP-Fit Plus                               | 265    | 1.11 | 0.67  | [-0.63 , 1.96] | Non-inferiority not shown | 0.312  |
| 46 | [MoP] Exeter V40 Elite Plus Ogee                           | 5,613  | 0.77 | 0.33  | [-0.07 , 0.72] | Non-inferiority not shown | 0.103  |

|    |                                                               |        |      |      |                 |                           |        |
|----|---------------------------------------------------------------|--------|------|------|-----------------|---------------------------|--------|
| 1  | [MoP] Exeter V40 Exeter Contemporary Flanged                  | 14,698 | 0.81 | 0.36 | [ 0.01 , 0.72]  | Non-inferiority not shown | 0.043  |
| 2  | [MoP] Exeter V40 Exeter Contemporary Hooded                   | 5,787  | 1.59 | 1.14 | [ 0.70 , 1.58]  | Inferior by $\geq 100\%$  | <0.001 |
| 3  | [MoP] Exeter V40 Exeter Duration                              | 4,914  | 1.14 | 0.70 | [ 0.26 , 1.13]  | Inferior by $\geq 20\%$   | 0.002  |
| 4  | [MoP] Exeter V40 Exeter X3 Rimfit                             | 1,966  | 0.71 | 0.27 | [ -0.15 , 0.68] | Non-inferiority not shown | 0.210  |
| 5  | [MoP] Exeter V40 Marathon                                     | 486    | 0.87 | 0.42 | [ -0.31 , 1.16] | Non-inferiority not shown | 0.261  |
| 6  | [MoP] Exeter V40 Opera                                        | 876    | 0.86 | 0.41 | [ -0.26 , 1.09] | Non-inferiority not shown | 0.232  |
| 7  | [MoP] Exeter V40 Pinnacle                                     | 1,011  | 1.06 | 0.61 | [ -0.02 , 1.25] | Non-inferiority not shown | 0.058  |
| 8  | [MoP] Exeter V40 Reflection Cementless                        | 785    | 0.74 | 0.30 | [ -0.38 , 0.97] | Non-inferiority not shown | 0.389  |
| 9  | [MoP] Exeter V40 Trident                                      | 6,447  | 1.11 | 0.67 | [ 0.28 , 1.06]  | Inferior by $\geq 20\%$   | 0.001  |
| 10 | [MoP] Exeter V40 Trilogy                                      | 3,453  | 0.79 | 0.34 | [ -0.09 , 0.77] | Non-inferiority not shown | 0.119  |
| 11 | [MoP] Exeter V40 Ultima Cemented Cup                          | 425    | 1.38 | 0.93 | [ -0.21 , 2.08] | Non-inferiority not shown | 0.109  |
| 12 | [MoP] Furlong Cemented Stem JRI Cemented Cup                  | 495    | 1.90 | 1.46 | [ 0.24 , 2.67]  | Inferior by $\geq 20\%$   | 0.019  |
| 13 | [MoP] Furlong HAC Stem CSF                                    | 2,428  | 1.91 | 1.47 | [ 0.85 , 2.08]  | Inferior by $\geq 100\%$  | <0.001 |
| 14 | [MoP] Furlong HAC Stem Furlong HAC CSF Plus                   | 1,020  | 1.79 | 1.35 | [ 0.60 , 2.10]  | Inferior by $\geq 100\%$  | <0.001 |
| 15 | [MoP] M/L Taper Cementless Continuum                          | 253    | 1.51 | 1.07 | [ -0.14 , 2.28] | Non-inferiority not shown | 0.084  |
| 16 | [MoP] Muller Straight Stem Original ME Muller Low Profile Cup | 530    | 1.06 | 0.62 | [ -0.24 , 1.47] | Non-inferiority not shown | 0.157  |
| 17 | [MoP] Muller-Biomet Apollo                                    | 634    | 1.93 | 1.49 | [ 0.40 , 2.58]  | Inferior by $\geq 20\%$   | 0.008  |
| 18 | [MoP] Muller-Biomet Original ME Muller Low Profile Cup        | 362    | 1.57 | 1.12 | [ -0.16 , 2.41] | Non-inferiority not shown | 0.087  |
| 19 | [MoP] Omnifit Cemented Stem ODC                               | 358    | 1.63 | 1.19 | [ -0.15 , 2.53] | Non-inferiority not shown | 0.081  |
| 20 | [MoP] Polarstem Cementless R3 Cementless                      | 355    | 0.64 | 0.20 | [ -0.35 , 0.75] | Non-inferiority not shown | 0.479  |
| 21 | [MoP] SL-Plus Cementless Stem EP-Fit Plus                     | 857    | 3.12 | 2.68 | [ 1.56 , 3.79]  | Inferior by $\geq 100\%$  | <0.001 |
| 22 | [MoP] SP II Cemented Stem Interplanta                         | 258    | 2.11 | 1.67 | [ -0.04 , 3.37] | Non-inferiority not shown | 0.055  |
| 23 | [MoP] Stanmore Modular Stem SHP Cup                           | 298    | 0.89 | 0.44 | [ -0.61 , 1.49] | Non-inferiority not shown | 0.411  |
| 24 | [MoP] Stanmore Modular Stem Stanmore-Arcom Cup                | 1,365  | 1.33 | 0.89 | [ 0.22 , 1.56]  | Inferior by $\geq 20\%$   | 0.009  |
| 25 | [MoP] Synergy Cementless Stem R3 Cementless                   | 363    | 0.63 | 0.19 | [ -0.46 , 0.83] | Non-inferiority not shown | 0.571  |
| 26 | [MoP] Synergy Cementless Stem Reflection Cementless           | 598    | 0.81 | 0.37 | [ -0.41 , 1.15] | Non-inferiority not shown | 0.357  |
| 27 | [MoP] Taperloc Cementless Stem Exceed ABT                     | 1,475  | 2.08 | 1.63 | [ 0.94 , 2.33]  | Inferior by $\geq 100\%$  | <0.001 |
| 28 | [MoP] Versys Cementless Stem Trilogy                          | 363    | 3.38 | 2.94 | [ 1.10 , 4.78]  | Inferior by $\geq 100\%$  | 0.002  |

**Supplemental table 4b: Difference in Kaplan-Meier failure estimate between a contemporary reference and implants with at least 250 at risk at 5 years since primary in females between 55 and 75 years**

| Stem/cup brand                                                | Number at risk | Cumulative failure (%) | Difference in failure (%) | 95% CI          | Equivalence status        | p-value |
|---------------------------------------------------------------|----------------|------------------------|---------------------------|-----------------|---------------------------|---------|
| [MoP] Exeter V40 Elite Plus Cemented Cup                      | 1,039          | 0.52                   | [REFERENCE]               |                 |                           |         |
| [CoC] ABG II Monolithic Cementless Stem ABG II Cementless Cup | 363            | 1.84                   | 1.32                      | [ -0.08 , 2.71] | Non-inferiority not shown | 0.064   |
| [CoC] ABG II Monolithic Cementless Stem Trident               | 250            | 3.09                   | 2.57                      | [ 0.64 , 4.49]  | Inferior by $\geq 100\%$  | 0.009   |
| [CoC] Accolade Trident                                        | 2,044          | 2.56                   | 2.04                      | [ 1.33 , 2.75]  | Inferior by $\geq 100\%$  | <0.001  |
| [CoC] Bimetric Cementless Stem Exceed ABT                     | 289            | 2.32                   | 1.80                      | [ 0.32 , 3.28]  | Inferior by $\geq 20\%$   | 0.017   |
| [CoC] Corail Duraloc Option                                   | 370            | 2.82                   | 2.30                      | [ 0.62 , 3.99]  | Inferior by $\geq 100\%$  | 0.007   |
| [CoC] Corail Pinnacle                                         | 6,445          | 1.82                   | 1.30                      | [ 0.86 , 1.74]  | Inferior by $\geq 100\%$  | <0.001  |

|    |                                                            |       |      |      |                |                           |        |
|----|------------------------------------------------------------|-------|------|------|----------------|---------------------------|--------|
| 1  | [CoC] Exeter V40 ABG II Cementless Cup                     | 563   | 1.05 | 0.53 | [-0.33 , 1.38] | Non-inferiority not shown | 0.225  |
| 2  | [CoC] Exeter V40 Trident                                   | 3,263 | 1.29 | 0.77 | [ 0.27 , 1.26] | Inferior by $\geq 20\%$   | 0.002  |
| 3  | [CoC] Furlong HAC Stem CSF                                 | 597   | 2.05 | 1.53 | [ 0.37 , 2.68] | Inferior by $\geq 20\%$   | 0.010  |
| 4  | [CoC] Furlong HAC Stem Furlong HAC CSF Plus                | 2,167 | 1.86 | 1.34 | [ 0.80 , 1.88] | Inferior by $\geq 100\%$  | <0.001 |
| 5  | [CoC] SL-Plus Cementless Stem EP-Fit Plus                  | 352   | 3.15 | 2.63 | [ 0.84 , 4.43] | Inferior by $\geq 100\%$  | 0.004  |
| 6  | [CoC] Taperloc Cementless Stem Exceed ABT                  | 1,583 | 1.68 | 1.16 | [ 0.59 , 1.72] | Inferior by $\geq 100\%$  | <0.001 |
| 7  | [CoP] Accolade Trident                                     | 638   | 1.84 | 1.32 | [ 0.56 , 2.08] | Inferior by $\geq 100\%$  | 0.001  |
| 8  | [CoP] C-Stem Cemented Stem Wroblewski Golf Ball            | 283   | 0.82 | 0.30 | [-0.69 , 1.30] | Non-inferiority not shown | 0.549  |
| 9  | [CoP] Corail Pinnacle                                      | 1,874 | 1.58 | 1.06 | [ 0.56 , 1.57] | Inferior by $\geq 100\%$  | <0.001 |
| 10 | [CoP] Corail Trilogy                                       | 327   | 1.09 | 0.57 | [-0.55 , 1.70] | Non-inferiority not shown | 0.317  |
| 11 | [CoP] Exeter V40 Elite Plus Ogee                           | 397   | 1.31 | 0.79 | [-0.20 , 1.77] | Non-inferiority not shown | 0.117  |
| 12 | [CoP] Exeter V40 Exeter Contemporary Flanged               | 964   | 1.38 | 0.86 | [ 0.20 , 1.52] | Inferior by $\geq 20\%$   | 0.011  |
| 13 | [CoP] Exeter V40 Exeter Contemporary Hooded                | 290   | 1.82 | 1.30 | [-0.01 , 2.60] | Non-inferiority not shown | 0.051  |
| 14 | [CoP] Exeter V40 Exeter Duration                           | 325   | 0.98 | 0.46 | [-0.56 , 1.49] | Non-inferiority not shown | 0.377  |
| 15 | [CoP] Exeter V40 Trident                                   | 999   | 1.37 | 0.86 | [ 0.28 , 1.43] | Inferior by $\geq 20\%$   | 0.003  |
| 16 | [CoP] Exeter V40 Trilogy                                   | 748   | 0.72 | 0.20 | [-0.44 , 0.84] | Non-inferiority not shown | 0.540  |
| 17 | [CoP] Furlong HAC Stem CSF                                 | 2,437 | 1.82 | 1.30 | [ 0.69 , 1.90] | Inferior by $\geq 100\%$  | <0.001 |
| 18 | [CoP] Furlong HAC Stem Furlong HAC CSF Plus                | 397   | 2.25 | 1.73 | [ 0.63 , 2.83] | Inferior by $\geq 100\%$  | 0.002  |
| 19 | [CoP] MS-30 Original ME Muller Low Profile Cup             | 576   | 0.72 | 0.21 | [-0.48 , 0.89] | Non-inferiority not shown | 0.557  |
| 20 | [CoP] SL-Plus Cementless Stem EP-Fit Plus                  | 317   | 3.48 | 2.96 | [ 1.07 , 4.86] | Inferior by $\geq 100\%$  | 0.002  |
| 21 | [CoP] Taperloc Cementless Stem Exceed ABT                  | 355   | 1.36 | 0.84 | [ 0.06 , 1.61] | Non-inferiority not shown | 0.035  |
| 22 | [MoP] Accolade Trident                                     | 2,455 | 2.47 | 1.95 | [ 1.34 , 2.56] | Inferior by $\geq 100\%$  | <0.001 |
| 23 | [MoP] C-Stem AMT Cemented Stem Charnley and Elite Plus LPW | 556   | 1.17 | 0.65 | [-0.16 , 1.46] | Non-inferiority not shown | 0.117  |
| 24 | [MoP] C-Stem AMT Cemented Stem Elite Plus Ogee             | 319   | 1.54 | 1.02 | [-0.14 , 2.18] | Non-inferiority not shown | 0.084  |
| 25 | [MoP] C-Stem AMT Cemented Stem Pinnacle                    | 308   | 1.68 | 1.16 | [ 0.17 , 2.14] | Inferior by $\geq 20\%$   | 0.021  |
| 26 | [MoP] C-Stem Cemented Stem Charnley Ogee                   | 335   | 2.64 | 2.12 | [ 0.53 , 3.71] | Inferior by $\geq 100\%$  | 0.009  |
| 27 | [MoP] C-Stem Cemented Stem Charnley and Elite Plus LPW     | 671   | 1.88 | 1.36 | [ 0.32 , 2.41] | Inferior by $\geq 20\%$   | 0.010  |
| 28 | [MoP] C-Stem Cemented Stem Duraloc Cementless Cup          | 285   | 2.32 | 1.80 | [ 0.06 , 3.54] | Non-inferiority not shown | 0.042  |
| 29 | [MoP] C-Stem Cemented Stem Elite Plus Ogee                 | 906   | 1.40 | 0.88 | [ 0.12 , 1.63] | Inferior by $\geq 20\%$   | 0.023  |
| 30 | [MoP] C-Stem Cemented Stem Marathon                        | 330   | 0.67 | 0.15 | [-0.46 , 0.76] | Non-inferiority not shown | 0.633  |
| 31 | [MoP] C-Stem Cemented Stem Opera                           | 407   | 0.90 | 0.38 | [-0.48 , 1.24] | Non-inferiority not shown | 0.390  |
| 32 | [MoP] C-Stem Cemented Stem Wroblewski Golf Ball            | 324   | 1.57 | 1.05 | [-0.25 , 2.36] | Non-inferiority not shown | 0.113  |
| 33 | [MoP] CCA Cemented Stem CCB Cup                            | 327   | 0.61 | 0.09 | [-0.70 , 0.88] | Non-inferiority not shown | 0.827  |
| 34 | [MoP] CPCS Opera                                           | 367   | 2.09 | 1.57 | [ 0.24 , 2.91] | Inferior by $\geq 20\%$   | 0.021  |
| 35 | [MoP] CPT Elite Plus Ogee                                  | 691   | 1.65 | 1.13 | [ 0.25 , 2.01] | Inferior by $\geq 20\%$   | 0.012  |
| 36 | [MoP] CPT Pinnacle                                         | 254   | 1.40 | 0.88 | [-0.53 , 2.29] | Non-inferiority not shown | 0.223  |
| 37 | [MoP] CPT Trilogy                                          | 2,468 | 2.22 | 1.70 | [ 1.10 , 2.30] | Inferior by $\geq 100\%$  | <0.001 |
| 38 | [MoP] CPT ZCA                                              | 1,787 | 2.02 | 1.50 | [ 0.84 , 2.15] | Inferior by $\geq 100\%$  | <0.001 |
| 39 | [MoP] Charnley Cemented Stem Charnley Cemented Cup         | 1,420 | 1.52 | 1.00 | [ 0.30 , 1.70] | Inferior by $\geq 20\%$   | 0.005  |
| 40 | [MoP] Charnley Cemented Stem Charnley Ogee                 | 2,959 | 1.84 | 1.32 | [ 0.74 , 1.90] | Inferior by $\geq 100\%$  | <0.001 |
| 41 | [MoP] Charnley Cemented Stem Charnley and Elite Plus LPW   | 2,049 | 1.18 | 0.67 | [ 0.09 , 1.24] | Non-inferiority not shown | 0.023  |
| 42 | [MoP] Charnley Cemented Stem Opera                         | 454   | 1.22 | 0.70 | [-0.34 , 1.73] | Non-inferiority not shown | 0.185  |
| 43 | [MoP] Charnley Cemented Stem Wroblewski Golf Ball          | 277   | 1.77 | 1.26 | [-0.20 , 2.71] | Non-inferiority not shown | 0.091  |
| 44 | [MoP] Corail Duraloc Cementless Cup                        | 1,465 | 2.31 | 1.79 | [ 0.96 , 2.62] | Inferior by $\geq 100\%$  | <0.001 |
| 45 | [MoP] Corail Elite Plus Cemented Cup                       | 277   | 0.55 | 0.03 | [-0.81 , 0.87] | Non-inferiority not shown | 0.947  |
| 46 | [MoP] Corail Elite Plus Ogee                               | 418   | 1.62 | 1.10 | [ 0.03 , 2.17] | Non-inferiority not shown | 0.044  |

|    |                                                               |        |      |      |                |                           |        |
|----|---------------------------------------------------------------|--------|------|------|----------------|---------------------------|--------|
| 1  | [MoP] Corail Marathon                                         | 586    | 0.96 | 0.44 | [-0.16 , 1.05] | Non-inferiority not shown | 0.153  |
| 2  | [MoP] Corail Pinnacle                                         | 7,089  | 1.41 | 0.89 | [ 0.49 , 1.30] | Inferior by $\geq 20\%$   | <0.001 |
| 3  | [MoP] Corail Trilogy                                          | 561    | 0.94 | 0.42 | [-0.36 , 1.20] | Non-inferiority not shown | 0.293  |
| 4  | [MoP] Exeter V40 ABG II Cementless Cup                        | 283    | 1.01 | 0.49 | [-0.70 , 1.67] | Non-inferiority not shown | 0.422  |
| 5  | [MoP] Exeter V40 Cenator Cemented Cup                         | 611    | 2.67 | 2.15 | [ 0.94 , 3.37] | Inferior by $\geq 100\%$  | <0.001 |
| 6  | [MoP] Exeter V40 Charnley Ogee                                | 568    | 1.39 | 0.87 | [-0.06 , 1.79] | Non-inferiority not shown | 0.068  |
| 7  | [MoP] Exeter V40 Charnley and Elite Plus LPW                  | 718    | 1.72 | 1.20 | [ 0.34 , 2.05] | Inferior by $\geq 20\%$   | 0.006  |
| 8  | [MoP] Exeter V40 Duraloc Cementless Cup                       | 488    | 1.37 | 0.85 | [-0.22 , 1.93] | Non-inferiority not shown | 0.119  |
| 9  | [MoP] Exeter V40 EP-Fit Plus                                  | 250    | 3.01 | 2.49 | [ 0.40 , 4.57] | Inferior by $\geq 20\%$   | 0.019  |
| 10 | [MoP] Exeter V40 Elite Plus Ogee                              | 4,543  | 1.18 | 0.66 | [ 0.21 , 1.12] | Inferior by $\geq 20\%$   | 0.004  |
| 11 | [MoP] Exeter V40 Exeter Contemporary Flanged                  | 10,220 | 1.16 | 0.64 | [ 0.25 , 1.04] | Inferior by $\geq 20\%$   | 0.001  |
| 12 | [MoP] Exeter V40 Exeter Contemporary Hooded                   | 4,277  | 2.45 | 1.93 | [ 1.40 , 2.46] | Inferior by $\geq 100\%$  | <0.001 |
| 13 | [MoP] Exeter V40 Exeter Duration                              | 4,048  | 1.48 | 0.96 | [ 0.47 , 1.44] | Inferior by $\geq 20\%$   | <0.001 |
| 14 | [MoP] Exeter V40 Exeter X3 Rimfit                             | 319    | 0.71 | 0.19 | [-0.25 , 0.63] | Non-inferiority not shown | 0.395  |
| 15 | [MoP] Exeter V40 Opera                                        | 655    | 1.22 | 0.70 | [-0.10 , 1.50] | Non-inferiority not shown | 0.088  |
| 16 | [MoP] Exeter V40 Pinnacle                                     | 658    | 1.40 | 0.88 | [ 0.12 , 1.64] | Inferior by $\geq 20\%$   | 0.023  |
| 17 | [MoP] Exeter V40 Reflection Cementless                        | 732    | 1.14 | 0.62 | [-0.20 , 1.44] | Non-inferiority not shown | 0.141  |
| 18 | [MoP] Exeter V40 Trident                                      | 4,016  | 1.44 | 0.92 | [ 0.47 , 1.36] | Inferior by $\geq 20\%$   | <0.001 |
| 19 | [MoP] Exeter V40 Trilogy                                      | 2,821  | 1.20 | 0.68 | [ 0.17 , 1.18] | Inferior by $\geq 20\%$   | 0.009  |
| 20 | [MoP] Exeter V40 Ultima Cemented Cup                          | 408    | 2.56 | 2.04 | [ 0.51 , 3.58] | Inferior by $\geq 20\%$   | 0.009  |
| 21 | [MoP] Furlong Cemented Stem JRI Cemented Cup                  | 458    | 2.52 | 2.00 | [ 0.60 , 3.41] | Inferior by $\geq 100\%$  | 0.005  |
| 22 | [MoP] Furlong HAC Stem CSF                                    | 2,056  | 2.08 | 1.56 | [ 0.91 , 2.22] | Inferior by $\geq 100\%$  | <0.001 |
| 23 | [MoP] Furlong HAC Stem Furlong HAC CSF Plus                   | 633    | 2.82 | 2.30 | [ 1.26 , 3.34] | Inferior by $\geq 100\%$  | <0.001 |
| 24 | [MoP] Muller Straight Stem Original ME Muller Low Profile Cup | 395    | 1.47 | 0.95 | [-0.08 , 1.98] | Non-inferiority not shown | 0.071  |
| 25 | [MoP] Muller-Biomet Apollo                                    | 535    | 2.11 | 1.59 | [ 0.44 , 2.74] | Inferior by $\geq 20\%$   | 0.007  |
| 26 | [MoP] Omnifit Cemented Stem ODC                               | 340    | 2.48 | 1.96 | [ 0.32 , 3.60] | Inferior by $\geq 20\%$   | 0.019  |
| 27 | [MoP] SL-Plus Cementless Stem EP-Fit Plus                     | 739    | 3.85 | 3.33 | [ 2.07 , 4.59] | Inferior by $\geq 100\%$  | <0.001 |
| 28 | [MoP] Stanmore Modular Stem Stanmore-Arcom Cup                | 1,106  | 2.20 | 1.68 | [ 0.83 , 2.53] | Inferior by $\geq 100\%$  | <0.001 |
| 29 | [MoP] Synergy Cementless Stem Reflection Cementless           | 577    | 1.15 | 0.63 | [-0.29 , 1.55] | Non-inferiority not shown | 0.179  |
| 30 | [MoP] Taperloc Cementless Stem Exceed ABT                     | 761    | 2.49 | 1.97 | [ 1.18 , 2.77] | Inferior by $\geq 100\%$  | <0.001 |
| 31 | [MoP] Versys Cementless Stem Trilogy                          | 342    | 4.74 | 4.22 | [ 2.05 , 6.38] | Inferior by $\geq 100\%$  | <0.001 |

**Supplemental table 4c: Difference in Kaplan-Meier failure estimate between a contemporary reference and implants with at least 250 at risk at 7 years since primary in females between 55 and 75 years**

| Stem/cup brand                                                | Number at risk | Cumulative failure (%) | Difference in failure (%) | 95% CI          | Equivalence status        | p-value |
|---------------------------------------------------------------|----------------|------------------------|---------------------------|-----------------|---------------------------|---------|
| [MoP] Exeter V40 Trilogy                                      | 1,962          | 1.45                   | [REFERENCE]               |                 |                           |         |
| [CoC] ABG II Monolithic Cementless Stem ABG II Cementless Cup | 335            | 2.11                   | 0.66                      | [-0.84 , 2.16]  | Non-inferiority not shown | 0.389   |
| [CoC] Accolade Trident                                        | 1,256          | 3.07                   | 1.62                      | [ 0.81 , 2.44]  | Inferior by $\geq 20\%$   | <0.001  |
| [CoC] Corail Duraloc Option                                   | 301            | 3.15                   | 1.70                      | [-0.11 , 3.50]  | Non-inferiority not shown | 0.065   |
| [CoC] Corail Pinnacle                                         | 2,917          | 2.20                   | 0.76                      | [ 0.25 , 1.26]  | Non-inferiority not shown | 0.004   |
| [CoC] Exeter V40 ABG II Cementless Cup                        | 454            | 1.65                   | 0.20                      | [-0.90 , 1.31]  | Non-inferiority not shown | 0.721   |
| [CoC] Exeter V40 Trident                                      | 2,340          | 1.76                   | 0.31                      | [-0.28 , 0.90]  | Non-inferiority not shown | 0.300   |
| [CoC] Furlong HAC Stem CSF                                    | 549            | 2.90                   | 1.45                      | [ 0.07 , 2.83]  | Non-inferiority not shown | 0.040   |
| [CoC] Furlong HAC Stem Furlong HAC CSF Plus                   | 830            | 2.23                   | 0.78                      | [ 0.12 , 1.44]  | Non-inferiority not shown | 0.021   |
| [CoC] SL-Plus Cementless Stem EP-Fit Plus                     | 295            | 3.46                   | 2.01                      | [ 0.11 , 3.90]  | Non-inferiority not shown | 0.038   |
| [CoC] Taperloc Cementless Stem Exceed ABT                     | 712            | 1.81                   | 0.36                      | [-0.29 , 1.01]  | Non-inferiority not shown | 0.279   |
| [CoP] Accolade Trident                                        | 257            | 2.02                   | 0.57                      | [-0.29 , 1.43]  | Non-inferiority not shown | 0.195   |
| [CoP] Corail Pinnacle                                         | 771            | 1.86                   | 0.41                      | [-0.20 , 1.02]  | Non-inferiority not shown | 0.183   |
| [CoP] Corail Trilogy                                          | 258            | 1.09                   | -0.35                     | [-1.50 , 0.79]  | Non-inferiority not shown | 0.543   |
| [CoP] Exeter V40 Elite Plus Ogee                              | 251            | 1.59                   | 0.15                      | [-1.00 , 1.29]  | Non-inferiority not shown | 0.804   |
| [CoP] Exeter V40 Exeter Contemporary Flanged                  | 563            | 1.38                   | -0.07                     | [-0.76 , 0.61]  | Non-inferiority not shown | 0.839   |
| [CoP] Exeter V40 Exeter Duration                              | 255            | 1.30                   | -0.14                     | [-1.36 , 1.07]  | Non-inferiority not shown | 0.818   |
| [CoP] Exeter V40 Trident                                      | 463            | 1.63                   | 0.19                      | [-0.52 , 0.89]  | Non-inferiority not shown | 0.606   |
| [CoP] Exeter V40 Trilogy                                      | 561            | 1.02                   | -0.43                     | [-1.22 , 0.35]  | Non-inferiority not shown | 0.282   |
| [CoP] Furlong HAC Stem CSF                                    | 2,033          | 2.34                   | 0.90                      | [ 0.20 , 1.60]  | Non-inferiority not shown | 0.012   |
| [CoP] MS-30 Original ME Muller Low Profile Cup                | 374            | 0.72                   | -0.72                     | [-1.43 , -0.01] | Non-inferior              | 0.046   |
| [MoP] Accolade Trident                                        | 1,158          | 3.23                   | 1.79                      | [ 1.03 , 2.54]  | Inferior by $\geq 20\%$   | <0.001  |
| [MoP] C-Stem AMT Cemented Stem Charnley and Elite Plus LPW    | 344            | 1.72                   | 0.28                      | [-0.85 , 1.41]  | Non-inferiority not shown | 0.632   |
| [MoP] C-Stem Cemented Stem Charnley Ogee                      | 284            | 2.97                   | 1.52                      | [-0.20 , 3.24]  | Non-inferiority not shown | 0.084   |
| [MoP] C-Stem Cemented Stem Charnley and Elite Plus LPW        | 617            | 2.66                   | 1.21                      | [-0.04 , 2.46]  | Non-inferiority not shown | 0.058   |
| [MoP] C-Stem Cemented Stem Elite Plus Ogee                    | 733            | 2.13                   | 0.68                      | [-0.29 , 1.65]  | Non-inferiority not shown | 0.170   |
| [MoP] C-Stem Cemented Stem Opera                              | 311            | 1.69                   | 0.24                      | [-1.01 , 1.49]  | Non-inferiority not shown | 0.709   |
| [MoP] CPT Elite Plus Ogee                                     | 470            | 2.58                   | 1.13                      | [-0.08 , 2.34]  | Non-inferiority not shown | 0.067   |
| [MoP] CPT Trilogy                                             | 1,661          | 2.95                   | 1.50                      | [ 0.77 , 2.23]  | Inferior by $\geq 20\%$   | <0.001  |
| [MoP] CPT ZCA                                                 | 1,254          | 2.39                   | 0.94                      | [ 0.20 , 1.68]  | Non-inferiority not shown | 0.013   |
| [MoP] Charnley Cemented Stem Charnley Cemented Cup            | 1,220          | 2.10                   | 0.65                      | [-0.18 , 1.48]  | Non-inferiority not shown | 0.125   |
| [MoP] Charnley Cemented Stem Charnley Ogee                    | 2,422          | 2.20                   | 0.76                      | [ 0.11 , 1.40]  | Non-inferiority not shown | 0.022   |
| [MoP] Charnley Cemented Stem Charnley and Elite Plus LPW      | 1,746          | 1.64                   | 0.20                      | [-0.48 , 0.87]  | Non-inferiority not shown | 0.569   |
| [MoP] Charnley Cemented Stem Opera                            | 345            | 2.16                   | 0.71                      | [-0.68 , 2.10]  | Non-inferiority not shown | 0.316   |
| [MoP] Corail Duraloc Cementless Cup                           | 1,258          | 3.66                   | 2.21                      | [ 1.18 , 3.25]  | Inferior by $\geq 20\%$   | <0.001  |
| [MoP] Corail Elite Plus Ogee                                  | 292            | 1.93                   | 0.48                      | [-0.76 , 1.72]  | Non-inferiority not shown | 0.449   |
| [MoP] Corail Pinnacle                                         | 3,659          | 1.82                   | 0.38                      | [-0.10 , 0.86]  | Non-inferiority not shown | 0.123   |
| [MoP] Corail Trilogy                                          | 369            | 1.65                   | 0.20                      | [-0.93 , 1.34]  | Non-inferiority not shown | 0.725   |
| [MoP] Exeter V40 ABG II Cementless Cup                        | 272            | 1.01                   | -0.44                     | [-1.65 , 0.76]  | Non-inferiority not shown | 0.472   |

|    |                                                               |       |      |       |                 |                           |        |
|----|---------------------------------------------------------------|-------|------|-------|-----------------|---------------------------|--------|
| 1  | [MoP] Exeter V40 Cenator Cemented Cup                         | 478   | 2.86 | 1.41  | [ 0.13 , 2.69]  | Non-inferiority not shown | 0.030  |
| 2  | [MoP] Exeter V40 Charnley Ogee                                | 467   | 1.39 | -0.06 | [-1.01 , 0.89]  | Non-inferiority not shown | 0.897  |
| 3  | [MoP] Exeter V40 Charnley and Elite Plus LPW                  | 470   | 2.39 | 0.94  | [-0.15 , 2.03]  | Non-inferiority not shown | 0.091  |
| 4  | [MoP] Exeter V40 Duraloc Cementless Cup                       | 392   | 1.79 | 0.34  | [-0.89 , 1.56]  | Non-inferiority not shown | 0.589  |
| 5  | [MoP] Exeter V40 Elite Plus Cemented Cup                      | 701   | 0.63 | -0.82 | [-1.40 , -0.23] | Non-inferior              | 0.006  |
| 6  | [MoP] Exeter V40 Elite Plus Ogee                              | 3,436 | 1.59 | 0.14  | [-0.38 , 0.67]  | Non-inferiority not shown | 0.593  |
| 7  | [MoP] Exeter V40 Exeter Contemporary Flanged                  | 6,755 | 1.51 | 0.06  | [-0.39 , 0.52]  | Non-inferiority not shown | 0.788  |
| 8  | [MoP] Exeter V40 Exeter Contemporary Hooded                   | 2,891 | 3.20 | 1.75  | [ 1.12 , 2.38]  | Inferior by $\geq 20\%$   | <0.001 |
| 9  | [MoP] Exeter V40 Exeter Duration                              | 3,049 | 2.17 | 0.72  | [ 0.14 , 1.31]  | Non-inferiority not shown | 0.016  |
| 10 | [MoP] Exeter V40 Opera                                        | 462   | 1.54 | 0.09  | [-0.84 , 1.02]  | Non-inferiority not shown | 0.850  |
| 11 | [MoP] Exeter V40 Pinnacle                                     | 346   | 1.56 | 0.11  | [-0.73 , 0.95]  | Non-inferiority not shown | 0.797  |
| 12 | [MoP] Exeter V40 Reflection Cementless                        | 591   | 2.01 | 0.56  | [-0.53 , 1.65]  | Non-inferiority not shown | 0.312  |
| 13 | [MoP] Exeter V40 Trident                                      | 2,291 | 2.01 | 0.56  | [ 0.01 , 1.11]  | Non-inferiority not shown | 0.046  |
| 14 | [MoP] Exeter V40 Ultima Cemented Cup                          | 379   | 2.80 | 1.36  | [-0.26 , 2.97]  | Non-inferiority not shown | 0.100  |
| 15 | [MoP] Furlong Cemented Stem JRI Cemented Cup                  | 416   | 2.97 | 1.52  | [-0.02 , 3.05]  | Non-inferiority not shown | 0.053  |
| 16 | [MoP] Furlong HAC Stem CSF                                    | 1,634 | 2.65 | 1.20  | [ 0.44 , 1.96]  | Inferior by $\geq 20\%$   | 0.002  |
| 17 | [MoP] Furlong HAC Stem Furlong HAC CSF Plus                   | 270   | 3.32 | 1.87  | [ 0.67 , 3.06]  | Inferior by $\geq 20\%$   | 0.002  |
| 18 | [MoP] Muller Straight Stem Original ME Muller Low Profile Cup | 264   | 2.38 | 0.93  | [-0.53 , 2.40]  | Non-inferiority not shown | 0.211  |
| 19 | [MoP] Muller-Biomet Apollo                                    | 414   | 2.72 | 1.27  | [-0.08 , 2.62]  | Non-inferiority not shown | 0.065  |
| 20 | [MoP] Omnifit Cemented Stem ODC                               | 309   | 3.99 | 2.54  | [ 0.45 , 4.63]  | Inferior by $\geq 20\%$   | 0.017  |
| 21 | [MoP] SL-Plus Cementless Stem EP-Fit Plus                     | 586   | 4.42 | 2.97  | [ 1.59 , 4.36]  | Inferior by $\geq 100\%$  | <0.001 |
| 22 | [MoP] Stanmore Modular Stem Stanmore-Arcom Cup                | 784   | 2.59 | 1.14  | [ 0.19 , 2.09]  | Non-inferiority not shown | 0.018  |
| 23 | [MoP] Synergy Cementless Stem Reflection Cementless           | 432   | 1.74 | 0.29  | [-0.86 , 1.44]  | Non-inferiority not shown | 0.617  |
| 24 | [MoP] Versys Cementless Stem Trilogy                          | 318   | 4.74 | 3.29  | [ 1.11 , 5.46]  | Inferior by $\geq 20\%$   | 0.003  |



**Supplemental table 4d: Difference in Kaplan-Meier failure estimate between a contemporary reference and implants with at least 250 at risk at 10 years since primary in females between 55 and 75 years**

| Stem/cup brand                                                | Number at risk | Cumulative failure (%) | Difference in failure (%) | 95% CI          | Equivalence status        | p-value |
|---------------------------------------------------------------|----------------|------------------------|---------------------------|-----------------|---------------------------|---------|
| [MoP] Exeter V40 Elite Plus Ogee                              | 1,609          | 2.16                   | [REFERENCE]               |                 |                           |         |
| [CoC] ABG II Monolithic Cementless Stem ABG II Cementless Cup | 259            | 2.44                   | 0.28                      | [-1.36 , 1.92]  | Non-inferiority not shown | 0.739   |
| [CoC] Corail Pinnacle                                         | 342            | 2.97                   | 0.81                      | [ 0.10 , 1.52]  | Non-inferiority not shown | 0.025   |
| [CoC] Exeter V40 Trident                                      | 727            | 2.29                   | 0.13                      | [-0.60 , 0.85]  | Non-inferiority not shown | 0.731   |
| [CoC] Furlong HAC Stem CSF                                    | 322            | 3.61                   | 1.45                      | [-0.16 , 3.06]  | Non-inferiority not shown | 0.077   |
| [CoP] Exeter V40 Trilogy                                      | 250            | 1.52                   | -0.64                     | [-1.72 , 0.43]  | Non-inferiority not shown | 0.243   |
| [CoP] Furlong HAC Stem CSF                                    | 1,151          | 3.18                   | 1.02                      | [ 0.17 , 1.88]  | Non-inferiority not shown | 0.019   |
| [MoP] C-Stem Cemented Stem Charnley and Elite Plus LPW        | 376            | 3.32                   | 1.16                      | [-0.26 , 2.57]  | Non-inferiority not shown | 0.108   |
| [MoP] C-Stem Cemented Stem Elite Plus Ogee                    | 373            | 2.97                   | 0.81                      | [-0.42 , 2.04]  | Non-inferiority not shown | 0.198   |
| [MoP] CPT Trilogy                                             | 562            | 4.25                   | 2.09                      | [ 1.06 , 3.12]  | Inferior by $\geq 20\%$   | <0.001  |
| [MoP] CPT ZCA                                                 | 520            | 3.72                   | 1.56                      | [ 0.48 , 2.64]  | Inferior by $\geq 20\%$   | 0.005   |
| [MoP] Charnley Cemented Stem Charnley Cemented Cup            | 782            | 3.09                   | 0.93                      | [-0.10 , 1.96]  | Non-inferiority not shown | 0.076   |
| [MoP] Charnley Cemented Stem Charnley Ogee                    | 1,368          | 3.80                   | 1.64                      | [ 0.77 , 2.51]  | Inferior by $\geq 20\%$   | <0.001  |
| [MoP] Charnley Cemented Stem Charnley and Elite Plus LPW      | 1,079          | 2.64                   | 0.48                      | [-0.38 , 1.34]  | Non-inferiority not shown | 0.275   |
| [MoP] Corail Duraloc Cementless Cup                           | 598            | 5.19                   | 3.03                      | [ 1.73 , 4.32]  | Inferior by $\geq 20\%$   | <0.001  |
| [MoP] Corail Pinnacle                                         | 849            | 2.37                   | 0.21                      | [-0.43 , 0.84]  | Non-inferiority not shown | 0.521   |
| [MoP] Exeter V40 Cenator Cemented Cup                         | 312            | 3.32                   | 1.16                      | [-0.28 , 2.59]  | Non-inferiority not shown | 0.114   |
| [MoP] Exeter V40 Charnley Ogee                                | 312            | 1.39                   | -0.77                     | [-1.74 , 0.19]  | Non-inferior              | 0.116   |
| [MoP] Exeter V40 Duraloc Cementless Cup                       | 257            | 3.96                   | 1.80                      | [-0.21 , 3.82]  | Non-inferiority not shown | 0.079   |
| [MoP] Exeter V40 Elite Plus Cemented Cup                      | 305            | 0.89                   | -1.27                     | [-2.07 , -0.48] | Non-inferior              | 0.002   |
| [MoP] Exeter V40 Exeter Contemporary Flanged                  | 2,152          | 2.29                   | 0.13                      | [-0.43 , 0.70]  | Non-inferiority not shown | 0.644   |
| [MoP] Exeter V40 Exeter Contemporary Hooded                   | 1,110          | 4.86                   | 2.70                      | [ 1.83 , 3.56]  | Inferior by $\geq 20\%$   | <0.001  |
| [MoP] Exeter V40 Exeter Duration                              | 1,344          | 3.44                   | 1.28                      | [ 0.51 , 2.05]  | Inferior by $\geq 20\%$   | 0.001   |
| [MoP] Exeter V40 Trident                                      | 523            | 3.05                   | 0.89                      | [ 0.06 , 1.72]  | Non-inferiority not shown | 0.035   |
| [MoP] Exeter V40 Trilogy                                      | 748            | 2.13                   | -0.03                     | [-0.78 , 0.72]  | Non-inferiority not shown | 0.931   |
| [MoP] Furlong Cemented Stem JRI Cemented Cup                  | 268            | 4.14                   | 1.98                      | [ 0.07 , 3.89]  | Non-inferiority not shown | 0.043   |
| [MoP] Furlong HAC Stem CSF                                    | 726            | 3.72                   | 1.56                      | [ 0.60 , 2.51]  | Inferior by $\geq 20\%$   | 0.001   |
| [MoP] Stanmore Modular Stem Stanmore-Arcom Cup                | 329            | 3.31                   | 1.15                      | [-0.00 , 2.30]  | Non-inferiority not shown | 0.050   |

**Supplemental table 5a: Difference in Kaplan-Meier failure estimate between a contemporary reference and implants with at least 250 at risk at 3 years since primary in females >75 years**

| Stem/cup brand                                             | Number at risk | Cumulative failure (%) | Difference in failure (%) | 95% CI         | Equivalence status        | p-value |
|------------------------------------------------------------|----------------|------------------------|---------------------------|----------------|---------------------------|---------|
| [MoP] Charnley Cemented Stem Charnley and Elite Plus LPW   | 1,794          | 0.55                   | [REFERENCE]               |                |                           |         |
| [CoC] Accolade Trident                                     | 251            | 2.21                   | 1.66                      | [-0.12 , 3.44] | Non-inferiority not shown | 0.067   |
| [CoC] Corail Pinnacle                                      | 757            | 2.22                   | 1.67                      | [ 0.67 , 2.66] | Inferior by $\geq 100\%$  | 0.001   |
| [CoC] Furlong HAC Stem Furlong HAC CSF Plus                | 540            | 0.68                   | 0.13                      | [-0.55 , 0.81] | Non-inferiority not shown | 0.700   |
| [CoP] Corail Pinnacle                                      | 431            | 0.69                   | 0.14                      | [-0.48 , 0.76] | Non-inferiority not shown | 0.653   |
| [CoP] Exeter V40 Trident                                   | 424            | 0.34                   | -0.21                     | [-0.72 , 0.30] | Non-inferiority not shown | 0.417   |
| [CoP] Furlong HAC Stem CSF                                 | 693            | 1.24                   | 0.69                      | [-0.14 , 1.52] | Non-inferiority not shown | 0.103   |
| [CoP] MS-30 Original ME Muller Low Profile Cup             | 300            | 0.00                   | --                        | [ -- , -- ]    | No failures to date       |         |
| [MoP] Accolade Trident                                     | 1,623          | 1.59                   | 1.04                      | [ 0.40 , 1.69] | Inferior by $\geq 20\%$   | 0.002   |
| [MoP] C-Stem AMT Cemented Stem Charnley and Elite Plus LPW | 646            | 1.09                   | 0.54                      | [-0.24 , 1.32] | Non-inferiority not shown | 0.176   |
| [MoP] C-Stem AMT Cemented Stem Elite Plus Ogee             | 646            | 0.88                   | 0.33                      | [-0.37 , 1.03] | Non-inferiority not shown | 0.354   |
| [MoP] C-Stem AMT Cemented Stem Marathon                    | 343            | 0.68                   | 0.13                      | [-0.52 , 0.78] | Non-inferiority not shown | 0.691   |
| [MoP] C-Stem AMT Cemented Stem Pinnacle                    | 369            | 1.48                   | 0.93                      | [ 0.12 , 1.74] | Inferior by $\geq 20\%$   | 0.024   |
| [MoP] C-Stem Cemented Stem Charnley and Elite Plus LPW     | 384            | 1.43                   | 0.88                      | [-0.30 , 2.06] | Non-inferiority not shown | 0.145   |
| [MoP] C-Stem Cemented Stem Elite Plus Ogee                 | 808            | 0.43                   | -0.12                     | [-0.65 , 0.42] | Non-inferiority not shown | 0.672   |
| [MoP] C-Stem Cemented Stem Marathon                        | 333            | 0.58                   | 0.03                      | [-0.63 , 0.69] | Non-inferiority not shown | 0.928   |
| [MoP] C-Stem Cemented Stem Opera                           | 270            | 0.34                   | -0.21                     | [-0.95 , 0.52] | Non-inferiority not shown | 0.568   |
| [MoP] CCA Cemented Stem CCB Cup                            | 329            | 1.00                   | 0.45                      | [-0.59 , 1.49] | Non-inferiority not shown | 0.394   |
| [MoP] CPCS Opera                                           | 309            | 0.61                   | 0.06                      | [-0.84 , 0.95] | Non-inferiority not shown | 0.904   |
| [MoP] CPT Elite Plus Ogee                                  | 585            | 1.11                   | 0.56                      | [-0.27 , 1.40] | Non-inferiority not shown | 0.186   |
| [MoP] CPT Original ME Muller Low Profile Cup               | 272            | 1.78                   | 1.23                      | [-0.25 , 2.70] | Non-inferiority not shown | 0.104   |
| [MoP] CPT Trabecular Metal Modular Cementless Cup          | 306            | 0.92                   | 0.37                      | [-0.60 , 1.34] | Non-inferiority not shown | 0.451   |
| [MoP] CPT Trilogy                                          | 2,024          | 1.12                   | 0.57                      | [ 0.07 , 1.08] | Non-inferiority not shown | 0.027   |
| [MoP] CPT ZCA                                              | 3,039          | 1.37                   | 0.82                      | [ 0.34 , 1.30] | Inferior by $\geq 20\%$   | 0.001   |
| [MoP] Charnley Cemented Stem Charnley Cemented Cup         | 926            | 0.92                   | 0.37                      | [-0.31 , 1.05] | Non-inferiority not shown | 0.289   |
| [MoP] Charnley Cemented Stem Charnley Ogee                 | 2,041          | 0.79                   | 0.24                      | [-0.25 , 0.72] | Non-inferiority not shown | 0.344   |
| [MoP] Charnley Cemented Stem Opera                         | 306            | 0.93                   | 0.38                      | [-0.72 , 1.49] | Non-inferiority not shown | 0.494   |
| [MoP] Charnley Cemented Stem Wroblewski Golf Ball          | 275            | 1.66                   | 1.11                      | [-0.37 , 2.59] | Non-inferiority not shown | 0.142   |
| [MoP] Corail Duraloc Cementless Cup                        | 535            | 0.68                   | 0.13                      | [-0.61 , 0.87] | Non-inferiority not shown | 0.727   |
| [MoP] Corail Elite Plus Cemented Cup                       | 272            | 0.65                   | 0.10                      | [-0.86 , 1.06] | Non-inferiority not shown | 0.841   |
| [MoP] Corail Elite Plus Ogee                               | 376            | 1.19                   | 0.64                      | [-0.36 , 1.64] | Non-inferiority not shown | 0.211   |
| [MoP] Corail Marathon                                      | 690            | 0.92                   | 0.37                      | [-0.28 , 1.01] | Non-inferiority not shown | 0.264   |
| [MoP] Corail Pinnacle                                      | 4,912          | 1.43                   | 0.88                      | [ 0.46 , 1.30] | Inferior by $\geq 20\%$   | <0.001  |
| [MoP] Corail Trilogy                                       | 336            | 0.77                   | 0.22                      | [-0.71 , 1.15] | Non-inferiority not shown | 0.642   |
| [MoP] Exeter V40 Cenator Cemented Cup                      | 694            | 0.99                   | 0.44                      | [-0.32 , 1.20] | Non-inferiority not shown | 0.256   |
| [MoP] Exeter V40 Charnley Ogee                             | 321            | 0.59                   | 0.04                      | [-0.84 , 0.92] | Non-inferiority not shown | 0.930   |
| [MoP] Exeter V40 Charnley and Elite Plus LPW               | 847            | 1.31                   | 0.76                      | [-0.02 , 1.54] | Non-inferiority not shown | 0.057   |
| [MoP] Exeter V40 Elite Plus Cemented Cup                   | 906            | 0.42                   | -0.14                     | [-0.62 , 0.35] | Non-inferiority not shown | 0.587   |
| [MoP] Exeter V40 Elite Plus Ogee                           | 5,144          | 0.61                   | 0.06                      | [-0.32 , 0.43] | Non-inferiority not shown | 0.772   |

|    |                                                               |        |      |       |                |                           |        |
|----|---------------------------------------------------------------|--------|------|-------|----------------|---------------------------|--------|
| 1  | [MoP] Exeter V40 Exeter Contemporary Flanged                  | 12,084 | 0.59 | 0.04  | [-0.31 , 0.39] | Non-inferiority not shown | 0.821  |
| 2  | [MoP] Exeter V40 Exeter Contemporary Hooded                   | 5,022  | 1.11 | 0.56  | [ 0.15 , 0.97] | Inferior by $\geq 20\%$   | 0.007  |
| 3  | [MoP] Exeter V40 Exeter Duration                              | 3,745  | 0.79 | 0.24  | [-0.18 , 0.65] | Non-inferiority not shown | 0.265  |
| 4  | [MoP] Exeter V40 Exeter X3 Rimfit                             | 1,286  | 0.68 | 0.13  | [-0.31 , 0.57] | Non-inferiority not shown | 0.567  |
| 5  | [MoP] Exeter V40 Marathon                                     | 365    | 0.95 | 0.40  | [-0.38 , 1.18] | Non-inferiority not shown | 0.319  |
| 6  | [MoP] Exeter V40 Opera                                        | 732    | 0.48 | -0.07 | [-0.64 , 0.50] | Non-inferiority not shown | 0.815  |
| 7  | [MoP] Exeter V40 Pinnacle                                     | 736    | 0.83 | 0.28  | [-0.31 , 0.87] | Non-inferiority not shown | 0.358  |
| 8  | [MoP] Exeter V40 Reflection Cementless                        | 494    | 0.75 | 0.20  | [-0.60 , 1.00] | Non-inferiority not shown | 0.623  |
| 9  | [MoP] Exeter V40 Trident                                      | 4,508  | 0.77 | 0.22  | [-0.16 , 0.60] | Non-inferiority not shown | 0.261  |
| 10 | [MoP] Exeter V40 Trilogy                                      | 1,511  | 0.87 | 0.32  | [-0.21 , 0.86] | Non-inferiority not shown | 0.240  |
| 11 | [MoP] Exeter V40 Ultima Cemented Cup                          | 337    | 0.82 | 0.27  | [-0.71 , 1.25] | Non-inferiority not shown | 0.591  |
| 12 | [MoP] Furlong Cemented Stem JRI Cemented Cup                  | 531    | 0.88 | 0.33  | [-0.51 , 1.16] | Non-inferiority not shown | 0.442  |
| 13 | [MoP] Furlong HAC Stem CSF                                    | 1,553  | 2.48 | 1.93  | [ 1.15 , 2.70] | Inferior by $\geq 100\%$  | <0.001 |
| 14 | [MoP] Furlong HAC Stem Furlong HAC CSF Plus                   | 792    | 2.58 | 2.03  | [ 1.08 , 2.97] | Inferior by $\geq 100\%$  | <0.001 |
| 15 | [MoP] MS-30 Original ME Muller Low Profile Cup                | 401    | 0.36 | -0.20 | [-0.78 , 0.39] | Non-inferiority not shown | 0.516  |
| 16 | [MoP] Muller Straight Stem Original ME Muller Low Profile Cup | 461    | 0.78 | 0.23  | [-0.53 , 0.99] | Non-inferiority not shown | 0.550  |
| 17 | [MoP] Muller-Biomet Apollo                                    | 551    | 0.66 | 0.11  | [-0.61 , 0.83] | Non-inferiority not shown | 0.763  |
| 18 | [MoP] Muller-Biomet Original ME Muller Low Profile Cup        | 342    | 1.08 | 0.53  | [-0.57 , 1.63] | Non-inferiority not shown | 0.346  |
| 19 | [MoP] Omnifit Cemented Stem ODC                               | 253    | 1.47 | 0.92  | [-0.55 , 2.39] | Non-inferiority not shown | 0.218  |
| 20 | [MoP] SL-Plus Cementless Stem EP-Fit Plus                     | 290    | 0.71 | 0.16  | [-0.70 , 1.02] | Non-inferiority not shown | 0.720  |
| 21 | [MoP] Stanmore Modular Stem SHP Cup                           | 367    | 0.64 | 0.09  | [-0.70 , 0.89] | Non-inferiority not shown | 0.819  |
| 22 | [MoP] Stanmore Modular Stem Stanmore-Arcom Cup                | 1,325  | 0.86 | 0.31  | [-0.26 , 0.87] | Non-inferiority not shown | 0.289  |
| 23 | [MoP] Taperloc Cementless Stem Exceed ABT                     | 733    | 1.73 | 1.18  | [ 0.37 , 1.99] | Inferior by $\geq 20\%$   | 0.004  |

**Supplemental table 5b: Difference in Kaplan-Meier failure estimate between a contemporary reference and implants with at least 250 at risk at 5 years since primary in females >75 years**

| Stem/cup brand                                                | Number at risk | Cumulative failure (%) | Difference in failure (%) | 95% CI         | Equivalence status        | p-value |
|---------------------------------------------------------------|----------------|------------------------|---------------------------|----------------|---------------------------|---------|
| [MoP] Charnley Cemented Stem Charnley and Elite Plus LPW      | 1,515          | 0.73                   | [REFERENCE]               |                |                           |         |
| [CoC] Corail Pinnacle                                         | 454            | 2.22                   | 1.49                      | [ 0.47 , 2.50] | Inferior by $\geq 20\%$   | 0.004   |
| [CoC] Furlong HAC Stem Furlong HAC CSF Plus                   | 302            | 1.22                   | 0.49                      | [-0.55 , 1.53] | Non-inferiority not shown | 0.352   |
| [CoP] Furlong HAC Stem CSF                                    | 539            | 1.56                   | 0.83                      | [-0.13 , 1.80] | Non-inferiority not shown | 0.089   |
| [MoP] Accolade Trident                                        | 1,066          | 2.01                   | 1.28                      | [ 0.53 , 2.03] | Inferior by $\geq 20\%$   | 0.001   |
| [MoP] C-Stem AMT Cemented Stem Charnley and Elite Plus LPW    | 388            | 1.25                   | 0.52                      | [-0.34 , 1.39] | Non-inferiority not shown | 0.236   |
| [MoP] C-Stem AMT Cemented Stem Elite Plus Ogee                | 345            | 0.88                   | 0.15                      | [-0.57 , 0.88] | Non-inferiority not shown | 0.682   |
| [MoP] C-Stem Cemented Stem Charnley and Elite Plus LPW        | 328            | 1.73                   | 1.00                      | [-0.33 , 2.33] | Non-inferiority not shown | 0.141   |
| [MoP] C-Stem Cemented Stem Elite Plus Ogee                    | 614            | 0.57                   | -0.16                     | [-0.79 , 0.47] | Non-inferiority not shown | 0.615   |
| [MoP] CPT Elite Plus Ogee                                     | 388            | 1.49                   | 0.76                      | [-0.24 , 1.77] | Non-inferiority not shown | 0.136   |
| [MoP] CPT Trilogy                                             | 1,273          | 1.88                   | 1.15                      | [ 0.47 , 1.83] | Inferior by $\geq 20\%$   | 0.001   |
| [MoP] CPT ZCA                                                 | 2,186          | 1.86                   | 1.13                      | [ 0.55 , 1.71] | Inferior by $\geq 20\%$   | <0.001  |
| [MoP] Charnley Cemented Stem Charnley Cemented Cup            | 780            | 1.27                   | 0.54                      | [-0.27 , 1.36] | Non-inferiority not shown | 0.190   |
| [MoP] Charnley Cemented Stem Charnley Ogee                    | 1,658          | 1.15                   | 0.42                      | [-0.17 , 1.01] | Non-inferiority not shown | 0.162   |
| [MoP] Corail Duraloc Cementless Cup                           | 479            | 1.66                   | 0.93                      | [-0.21 , 2.07] | Non-inferiority not shown | 0.111   |
| [MoP] Corail Marathon                                         | 325            | 0.92                   | 0.19                      | [-0.49 , 0.86] | Non-inferiority not shown | 0.585   |
| [MoP] Corail Pinnacle                                         | 2,638          | 1.78                   | 1.05                      | [ 0.55 , 1.55] | Inferior by $\geq 20\%$   | <0.001  |
| [MoP] Corail Trilogy                                          | 261            | 1.11                   | 0.39                      | [-0.78 , 1.55] | Non-inferiority not shown | 0.515   |
| [MoP] Exeter V40 Cenator Cemented Cup                         | 533            | 1.32                   | 0.59                      | [-0.31 , 1.49] | Non-inferiority not shown | 0.201   |
| [MoP] Exeter V40 Charnley Ogee                                | 264            | 1.27                   | 0.54                      | [-0.76 , 1.85] | Non-inferiority not shown | 0.414   |
| [MoP] Exeter V40 Charnley and Elite Plus LPW                  | 575            | 1.31                   | 0.58                      | [-0.23 , 1.39] | Non-inferiority not shown | 0.159   |
| [MoP] Exeter V40 Elite Plus Cemented Cup                      | 653            | 0.53                   | -0.20                     | [-0.77 , 0.38] | Non-inferiority not shown | 0.502   |
| [MoP] Exeter V40 Elite Plus Ogee                              | 3,667          | 0.84                   | 0.11                      | [-0.34 , 0.56] | Non-inferiority not shown | 0.644   |
| [MoP] Exeter V40 Exeter Contemporary Flanged                  | 7,444          | 0.86                   | 0.13                      | [-0.28 , 0.55] | Non-inferiority not shown | 0.524   |
| [MoP] Exeter V40 Exeter Contemporary Hooded                   | 3,318          | 1.47                   | 0.74                      | [ 0.24 , 1.23] | Inferior by $\geq 20\%$   | 0.003   |
| [MoP] Exeter V40 Exeter Duration                              | 2,928          | 1.18                   | 0.46                      | [-0.05 , 0.96] | Non-inferiority not shown | 0.078   |
| [MoP] Exeter V40 Opera                                        | 530            | 0.63                   | -0.10                     | [-0.77 , 0.57] | Non-inferiority not shown | 0.768   |
| [MoP] Exeter V40 Pinnacle                                     | 386            | 1.03                   | 0.30                      | [-0.44 , 1.04] | Non-inferiority not shown | 0.422   |
| [MoP] Exeter V40 Reflection Cementless                        | 402            | 0.96                   | 0.23                      | [-0.69 , 1.16] | Non-inferiority not shown | 0.620   |
| [MoP] Exeter V40 Trident                                      | 2,517          | 1.05                   | 0.32                      | [-0.15 , 0.79] | Non-inferiority not shown | 0.179   |
| [MoP] Exeter V40 Trilogy                                      | 1,080          | 1.32                   | 0.59                      | [-0.08 , 1.27] | Non-inferiority not shown | 0.085   |
| [MoP] Exeter V40 Ultima Cemented Cup                          | 300            | 1.15                   | 0.42                      | [-0.77 , 1.61] | Non-inferiority not shown | 0.488   |
| [MoP] Furlong Cemented Stem JRI Cemented Cup                  | 426            | 0.88                   | 0.15                      | [-0.71 , 1.00] | Non-inferiority not shown | 0.734   |
| [MoP] Furlong HAC Stem CSF                                    | 1,201          | 3.07                   | 2.34                      | [ 1.44 , 3.24] | Inferior by $\geq 100\%$  | <0.001  |
| [MoP] Furlong HAC Stem Furlong HAC CSF Plus                   | 481            | 2.71                   | 1.98                      | [ 0.98 , 2.98] | Inferior by $\geq 100\%$  | <0.001  |
| [MoP] MS-30 Original ME Muller Low Profile Cup                | 259            | 1.30                   | 0.57                      | [-0.67 , 1.81] | Non-inferiority not shown | 0.366   |
| [MoP] Muller Straight Stem Original ME Muller Low Profile Cup | 319            | 1.04                   | 0.31                      | [-0.62 , 1.25] | Non-inferiority not shown | 0.514   |
| [MoP] Muller-Biomet Apollo                                    | 422            | 0.86                   | 0.13                      | [-0.71 , 0.98] | Non-inferiority not shown | 0.759   |
| [MoP] Stanmore Modular Stem Stanmore-Arcom Cup                | 979            | 1.12                   | 0.39                      | [-0.28 , 1.06] | Non-inferiority not shown | 0.253   |

---

[MoP] Taperloc Cementless Stem Exceed ABT 337 1.95 1.22 [ 0.29 , 2.15] Inferior by  $\geq 20\%$  0.010

1  
2  
3  
4  
5  
6  
7  
8  
9  
10  
11  
12  
13  
14  
15  
16  
17  
18  
19  
20  
21  
22  
23  
24  
25  
26  
27  
28  
29  
30  
31  
32  
33  
34  
35  
36  
37  
38  
39  
40  
41  
42  
43  
44  
45  
46

For peer review only

**Supplemental table 5c: Difference in Kaplan-Meier failure estimate between a contemporary reference and implants with at least 250 at risk at 7 years since primary in females >75 years**

| Stem/cup brand                                           | Number at risk | Cumulative failure (%) | Difference in failure (%) | 95% CI         | Equivalence status        | p-value |
|----------------------------------------------------------|----------------|------------------------|---------------------------|----------------|---------------------------|---------|
| [MoP] Charnley Cemented Stem Charnley and Elite Plus LPW | 1,119          | 0.88                   | [REFERENCE]               |                |                           |         |
| [CoP] Furlong HAC Stem CSF                               | 391            | 2.04                   | 1.16                      | [-0.02 , 2.34] | Non-inferiority not shown | 0.055   |
| [MoP] Accolade Trident                                   | 460            | 2.40                   | 1.52                      | [ 0.61 , 2.42] | Inferior by $\geq 20\%$   | 0.001   |
| [MoP] C-Stem Cemented Stem Charnley and Elite Plus LPW   | 292            | 1.73                   | 0.85                      | [-0.50 , 2.19] | Non-inferiority not shown | 0.218   |
| [MoP] C-Stem Cemented Stem Elite Plus Ogee               | 444            | 0.57                   | -0.31                     | [-0.98 , 0.35] | Non-inferiority not shown | 0.354   |
| [MoP] CPT Trilogy                                        | 689            | 2.22                   | 1.34                      | [ 0.53 , 2.16] | Inferior by $\geq 20\%$   | 0.001   |
| [MoP] CPT ZCA                                            | 1,341          | 2.44                   | 1.56                      | [ 0.85 , 2.27] | Inferior by $\geq 20\%$   | <0.001  |
| [MoP] Charnley Cemented Stem Charnley Cemented Cup       | 605            | 1.72                   | 0.84                      | [-0.14 , 1.81] | Non-inferiority not shown | 0.093   |
| [MoP] Charnley Cemented Stem Charnley Ogee               | 1,236          | 1.35                   | 0.47                      | [-0.20 , 1.13] | Non-inferiority not shown | 0.167   |
| [MoP] Corail Duraloc Cementless Cup                      | 363            | 2.36                   | 1.48                      | [ 0.08 , 2.88] | Non-inferiority not shown | 0.039   |
| [MoP] Corail Pinnacle                                    | 1,150          | 2.17                   | 1.28                      | [ 0.67 , 1.90] | Inferior by $\geq 20\%$   | <0.001  |
| [MoP] Exeter V40 Cenator Cemented Cup                    | 373            | 1.32                   | 0.44                      | [-0.49 , 1.37] | Non-inferiority not shown | 0.355   |
| [MoP] Exeter V40 Charnley and Elite Plus LPW             | 309            | 1.31                   | 0.43                      | [-0.41 , 1.26] | Non-inferiority not shown | 0.313   |
| [MoP] Exeter V40 Elite Plus Cemented Cup                 | 429            | 0.95                   | 0.07                      | [-0.77 , 0.90] | Non-inferiority not shown | 0.879   |
| [MoP] Exeter V40 Elite Plus Ogee                         | 2,329          | 1.18                   | 0.30                      | [-0.24 , 0.83] | Non-inferiority not shown | 0.283   |
| [MoP] Exeter V40 Exeter Contemporary Flanged             | 4,187          | 1.13                   | 0.24                      | [-0.24 , 0.73] | Non-inferiority not shown | 0.320   |
| [MoP] Exeter V40 Exeter Contemporary Hooded              | 1,866          | 2.16                   | 1.28                      | [ 0.66 , 1.90] | Inferior by $\geq 20\%$   | <0.001  |
| [MoP] Exeter V40 Exeter Duration                         | 1,961          | 1.66                   | 0.78                      | [ 0.17 , 1.39] | Non-inferiority not shown | 0.012   |
| [MoP] Exeter V40 Opera                                   | 317            | 0.85                   | -0.03                     | [-0.86 , 0.80] | Non-inferiority not shown | 0.950   |
| [MoP] Exeter V40 Reflection Cementless                   | 258            | 1.34                   | 0.46                      | [-0.74 , 1.66] | Non-inferiority not shown | 0.452   |
| [MoP] Exeter V40 Trident                                 | 1,221          | 1.27                   | 0.39                      | [-0.17 , 0.95] | Non-inferiority not shown | 0.168   |
| [MoP] Exeter V40 Trilogy                                 | 618            | 1.41                   | 0.53                      | [-0.20 , 1.26] | Non-inferiority not shown | 0.151   |
| [MoP] Furlong Cemented Stem JRI Cemented Cup             | 307            | 1.11                   | 0.23                      | [-0.76 , 1.22] | Non-inferiority not shown | 0.649   |
| [MoP] Furlong HAC Stem CSF                               | 882            | 3.51                   | 2.63                      | [ 1.63 , 3.63] | Inferior by $\geq 100\%$  | <0.001  |
| [MoP] Muller-Biomet Apollo                               | 288            | 0.86                   | -0.02                     | [-0.89 , 0.85] | Non-inferiority not shown | 0.965   |
| [MoP] Stanmore Modular Stem Stanmore-Arcom Cup           | 575            | 1.36                   | 0.48                      | [-0.29 , 1.26] | Non-inferiority not shown | 0.223   |

**Supplemental table 6a: Difference in Kaplan-Meier failure estimate between a contemporary reference and implants with at least 250 at risk at 3 years since primary in males**

| Stem/cup brand                                                | Number at risk | Cumulative failure (%) | Difference in failure (%) | 95% CI         | Equivalence status        | p-value |
|---------------------------------------------------------------|----------------|------------------------|---------------------------|----------------|---------------------------|---------|
| [CoP] Exeter V40 Exeter Contemporary Flanged                  | 1,147          | 0.76                   | [REFERENCE]               |                |                           |         |
| [CoC] ABG II Monolithic Cementless Stem ABG II Cementless Cup | 560            | 2.22                   | 1.46                      | [ 0.19 , 2.73] | Inferior by $\geq 20\%$   | 0.024   |
| [CoC] ABG II Monolithic Cementless Stem Trident               | 544            | 1.76                   | 1.00                      | [-0.16 , 2.17] | Non-inferiority not shown | 0.091   |
| [CoC] Accolade Trident                                        | 3,001          | 2.33                   | 1.57                      | [ 0.90 , 2.25] | Inferior by $\geq 100\%$  | <0.001  |
| [CoC] Bimetric Cementless Stem Exceed ABT                     | 377            | 0.89                   | 0.14                      | [-0.84 , 1.11] | Non-inferiority not shown | 0.784   |
| [CoC] C-Stem AMT Cemented Stem Pinnacle                       | 284            | 0.43                   | -0.33                     | [-1.06 , 0.40] | Non-inferiority not shown | 0.380   |
| [CoC] CPT Continuum                                           | 321            | 2.54                   | 1.78                      | [ 0.30 , 3.27] | Inferior by $\geq 20\%$   | 0.019   |
| [CoC] Corail Delta TT                                         | 274            | 2.45                   | 1.69                      | [ 0.11 , 3.27] | Non-inferiority not shown | 0.036   |
| [CoC] Corail DeltaMotion                                      | 452            | 1.67                   | 0.91                      | [-0.25 , 2.08] | Non-inferiority not shown | 0.125   |
| [CoC] Corail Duraloc Option                                   | 463            | 2.29                   | 1.53                      | [ 0.13 , 2.94] | Non-inferiority not shown | 0.033   |
| [CoC] Corail Pinnacle                                         | 12,616         | 1.92                   | 1.16                      | [ 0.68 , 1.64] | Inferior by $\geq 20\%$   | <0.001  |
| [CoC] Excia Cementless Plasmacup SC                           | 419            | 0.85                   | 0.09                      | [-0.77 , 0.95] | Non-inferiority not shown | 0.832   |
| [CoC] Exeter V40 ABG II Cementless Cup                        | 457            | 1.13                   | 0.38                      | [-0.62 , 1.38] | Non-inferiority not shown | 0.460   |
| [CoC] Exeter V40 Trident                                      | 4,326          | 1.13                   | 0.37                      | [-0.15 , 0.89] | Non-inferiority not shown | 0.158   |
| [CoC] Furlong Evolution Cementless Furlong HAC CSF Plus       | 275            | 2.00                   | 1.24                      | [ 0.12 , 2.36] | Non-inferiority not shown | 0.030   |
| [CoC] Furlong HAC Stem CSF                                    | 688            | 2.76                   | 2.00                      | [ 0.73 , 3.27] | Inferior by $\geq 20\%$   | 0.002   |
| [CoC] Furlong HAC Stem Furlong HAC CSF Plus                   | 4,023          | 1.72                   | 0.96                      | [ 0.41 , 1.51] | Inferior by $\geq 20\%$   | 0.001   |
| [CoC] M/L Taper Cementless Continuum                          | 704            | 1.73                   | 0.97                      | [ 0.05 , 1.90] | Non-inferiority not shown | 0.040   |
| [CoC] Metafix Stem Trinity                                    | 344            | 1.09                   | 0.33                      | [-0.59 , 1.26] | Non-inferiority not shown | 0.479   |
| [CoC] Polarstem Cementless R3 Cementless                      | 341            | 0.37                   | -0.39                     | [-1.06 , 0.27] | Non-inferiority not shown | 0.248   |
| [CoC] SL-Plus Cementless Stem EP-Fit Plus                     | 601            | 5.11                   | 4.36                      | [ 2.60 , 6.11] | Inferior by $\geq 100\%$  | <0.001  |
| [CoC] SL-Plus Cementless Stem R3 Cementless                   | 298            | 1.48                   | 0.72                      | [-0.64 , 2.08] | Non-inferiority not shown | 0.298   |
| [CoC] SPS Modular April - Ceramic                             | 291            | 0.59                   | -0.17                     | [-1.09 , 0.75] | Non-inferiority not shown | 0.722   |
| [CoC] Taperloc Cementless Stem Exceed ABT                     | 2,976          | 1.64                   | 0.88                      | [ 0.30 , 1.46] | Inferior by $\geq 20\%$   | 0.003   |
| [CoC] miniHip Trinity                                         | 273            | 3.21                   | 2.46                      | [ 0.68 , 4.24] | Inferior by $\geq 20\%$   | 0.007   |
| [CoP] Accolade Trident                                        | 1,319          | 1.66                   | 0.91                      | [ 0.21 , 1.60] | Inferior by $\geq 20\%$   | 0.011   |
| [CoP] C-Stem Cemented Stem Elite Plus Ogee                    | 265            | 0.93                   | 0.17                      | [-0.96 , 1.30] | Non-inferiority not shown | 0.771   |
| [CoP] C-Stem Cemented Stem Marathon                           | 526            | 1.07                   | 0.31                      | [-0.49 , 1.11] | Non-inferiority not shown | 0.447   |
| [CoP] C-Stem Cemented Stem Opera                              | 341            | 1.15                   | 0.39                      | [-0.81 , 1.60] | Non-inferiority not shown | 0.520   |
| [CoP] C-Stem Cemented Stem Wroblewski Golf Ball               | 396            | 0.90                   | 0.14                      | [-0.84 , 1.12] | Non-inferiority not shown | 0.779   |
| [CoP] CPT Trilogy                                             | 450            | 1.91                   | 1.15                      | [ 0.24 , 2.05] | Inferior by $\geq 20\%$   | 0.013   |
| [CoP] Corail Charnley and Elite Plus LPW                      | 252            | 1.10                   | 0.35                      | [-0.97 , 1.66] | Non-inferiority not shown | 0.606   |
| [CoP] Corail Marathon                                         | 525            | 1.69                   | 0.93                      | [-0.02 , 1.89] | Non-inferiority not shown | 0.055   |
| [CoP] Corail Pinnacle                                         | 3,493          | 1.14                   | 0.38                      | [-0.11 , 0.88] | Non-inferiority not shown | 0.131   |
| [CoP] Exeter V40 Charnley and Elite Plus LPW                  | 300            | 1.07                   | 0.31                      | [-0.82 , 1.44] | Non-inferiority not shown | 0.593   |
| [CoP] Exeter V40 Elite Plus Ogee                              | 536            | 0.86                   | 0.10                      | [-0.71 , 0.92] | Non-inferiority not shown | 0.803   |
| [CoP] Exeter V40 Exeter Contemporary Hooded                   | 298            | 2.35                   | 1.59                      | [-0.00 , 3.18] | Non-inferiority not shown | 0.050   |
| [CoP] Exeter V40 Exeter Duration                              | 300            | 0.27                   | -0.49                     | [-1.17 , 0.18] | Non-inferiority not shown | 0.152   |
| [CoP] Exeter V40 Exeter X3 Rimfit                             | 911            | 1.32                   | 0.56                      | [-0.15 , 1.27] | Non-inferiority not shown | 0.120   |
| [CoP] Exeter V40 Pinnacle                                     | 251            | 1.17                   | 0.41                      | [-0.58 , 1.40] | Non-inferiority not shown | 0.418   |

|    |                                                            |        |      |       |                |                           |        |
|----|------------------------------------------------------------|--------|------|-------|----------------|---------------------------|--------|
| 1  | [CoP] Exeter V40 Trident                                   | 1,917  | 0.79 | 0.04  | [-0.47 , 0.55] | Non-inferiority not shown | 0.887  |
| 2  | [CoP] Exeter V40 Trilogy                                   | 764    | 1.73 | 0.97  | [ 0.00 , 1.94] | Non-inferiority not shown | 0.050  |
| 3  | [CoP] Furlong HAC Stem CSF                                 | 2,536  | 1.18 | 0.42  | [-0.17 , 1.01] | Non-inferiority not shown | 0.162  |
| 4  | [CoP] Furlong HAC Stem Furlong HAC CSF Plus                | 699    | 1.22 | 0.46  | [-0.33 , 1.26] | Non-inferiority not shown | 0.250  |
| 5  | [CoP] MS-30 Original ME Muller Low Profile Cup             | 459    | 0.35 | -0.41 | [-1.06 , 0.24] | Non-inferiority not shown | 0.217  |
| 6  | [CoP] SL-Plus Cementless Stem Bicon-Plus                   | 279    | 3.64 | 2.88  | [ 0.73 , 5.04] | Inferior by $\geq 20\%$   | 0.009  |
| 7  | [CoP] SL-Plus Cementless Stem EP-Fit Plus                  | 366    | 1.82 | 1.06  | [-0.34 , 2.47] | Non-inferiority not shown | 0.138  |
| 8  | [CoP] Taperloc Cementless Stem Exceed ABT                  | 821    | 1.17 | 0.41  | [-0.27 , 1.09] | Non-inferiority not shown | 0.240  |
| 9  | [MoP] Accolade Trident                                     | 3,597  | 2.40 | 1.65  | [ 1.02 , 2.27] | Inferior by $\geq 100\%$  | <0.001 |
| 10 | [MoP] Anthology R3 Cementless                              | 427    | 2.22 | 1.46  | [ 0.36 , 2.56] | Inferior by $\geq 20\%$   | 0.009  |
| 11 | [MoP] C-Stem AMT Cemented Stem Charnley and Elite Plus LPW | 717    | 1.65 | 0.89  | [-0.07 , 1.85] | Non-inferiority not shown | 0.070  |
| 12 | [MoP] C-Stem AMT Cemented Stem Elite Plus Ogee             | 473    | 0.61 | -0.15 | [-0.89 , 0.59] | Non-inferiority not shown | 0.690  |
| 13 | [MoP] C-Stem AMT Cemented Stem Marathon                    | 406    | 1.04 | 0.28  | [-0.47 , 1.03] | Non-inferiority not shown | 0.461  |
| 14 | [MoP] C-Stem AMT Cemented Stem Pinnacle                    | 495    | 1.18 | 0.42  | [-0.37 , 1.22] | Non-inferiority not shown | 0.296  |
| 15 | [MoP] C-Stem Cemented Stem Charnley Ogee                   | 251    | 0.91 | 0.15  | [-0.96 , 1.26] | Non-inferiority not shown | 0.794  |
| 16 | [MoP] C-Stem Cemented Stem Charnley and Elite Plus LPW     | 476    | 0.79 | 0.03  | [-0.85 , 0.92] | Non-inferiority not shown | 0.942  |
| 17 | [MoP] C-Stem Cemented Stem Elite Plus Cemented Cup         | 261    | 0.70 | -0.06 | [-1.12 , 1.00] | Non-inferiority not shown | 0.918  |
| 18 | [MoP] C-Stem Cemented Stem Elite Plus Ogee                 | 1,224  | 1.18 | 0.42  | [-0.29 , 1.12] | Non-inferiority not shown | 0.243  |
| 19 | [MoP] C-Stem Cemented Stem Marathon                        | 597    | 1.40 | 0.65  | [-0.25 , 1.54] | Non-inferiority not shown | 0.155  |
| 20 | [MoP] C-Stem Cemented Stem Opera                           | 528    | 1.62 | 0.86  | [-0.27 , 2.00] | Non-inferiority not shown | 0.137  |
| 21 | [MoP] C-Stem Cemented Stem Wroblewski Golf Ball            | 354    | 1.29 | 0.53  | [-0.67 , 1.73] | Non-inferiority not shown | 0.388  |
| 22 | [MoP] CCA Cemented Stem CCB Cup                            | 337    | 0.47 | -0.28 | [-1.07 , 0.50] | Non-inferiority not shown | 0.480  |
| 23 | [MoP] CLS Cementless Stem Allofit                          | 265    | 3.32 | 2.56  | [ 0.49 , 4.63] | Inferior by $\geq 20\%$   | 0.015  |
| 24 | [MoP] CPCS Opera                                           | 371    | 0.51 | -0.24 | [-1.07 , 0.59] | Non-inferiority not shown | 0.567  |
| 25 | [MoP] CPT Elite Plus Ogee                                  | 862    | 1.64 | 0.88  | [-0.02 , 1.79] | Non-inferiority not shown | 0.056  |
| 26 | [MoP] CPT Trilogy                                          | 2,750  | 1.70 | 0.95  | [ 0.35 , 1.54] | Inferior by $\geq 20\%$   | 0.002  |
| 27 | [MoP] CPT ZCA                                              | 2,153  | 1.52 | 0.76  | [ 0.15 , 1.37] | Non-inferiority not shown | 0.015  |
| 28 | [MoP] Charnley Cemented Stem Charnley Cemented Cup         | 1,527  | 1.34 | 0.58  | [-0.12 , 1.28] | Non-inferiority not shown | 0.107  |
| 29 | [MoP] Charnley Cemented Stem Charnley Ogee                 | 3,293  | 1.35 | 0.59  | [ 0.02 , 1.16] | Non-inferiority not shown | 0.043  |
| 30 | [MoP] Charnley Cemented Stem Charnley and Elite Plus LPW   | 1,647  | 0.97 | 0.22  | [-0.41 , 0.84] | Non-inferiority not shown | 0.496  |
| 31 | [MoP] Charnley Cemented Stem Opera                         | 407    | 1.15 | 0.39  | [-0.70 , 1.49] | Non-inferiority not shown | 0.479  |
| 32 | [MoP] Charnley Cemented Stem Wroblewski Golf Ball          | 382    | 1.45 | 0.69  | [-0.54 , 1.92] | Non-inferiority not shown | 0.270  |
| 33 | [MoP] Corail Duraloc Cementless Cup                        | 1,310  | 1.59 | 0.83  | [ 0.05 , 1.62] | Non-inferiority not shown | 0.038  |
| 34 | [MoP] Corail Elite Plus Cemented Cup                       | 337    | 1.52 | 0.76  | [-0.52 , 2.04] | Non-inferiority not shown | 0.245  |
| 35 | [MoP] Corail Elite Plus Ogee                               | 471    | 1.51 | 0.75  | [-0.32 , 1.82] | Non-inferiority not shown | 0.171  |
| 36 | [MoP] Corail Marathon                                      | 978    | 1.50 | 0.74  | [-0.00 , 1.48] | Non-inferiority not shown | 0.050  |
| 37 | [MoP] Corail Pinnacle                                      | 11,121 | 1.53 | 0.78  | [ 0.31 , 1.25] | Inferior by $\geq 20\%$   | 0.001  |
| 38 | [MoP] Corail Trilogy                                       | 726    | 1.48 | 0.72  | [-0.21 , 1.66] | Non-inferiority not shown | 0.131  |
| 39 | [MoP] Exeter V40 ABG II Cementless Cup                     | 258    | 2.15 | 1.39  | [-0.36 , 3.15] | Non-inferiority not shown | 0.120  |
| 40 | [MoP] Exeter V40 Cenator Cemented Cup                      | 705    | 1.30 | 0.55  | [-0.37 , 1.46] | Non-inferiority not shown | 0.240  |
| 41 | [MoP] Exeter V40 Charnley and Elite Plus LPW               | 667    | 1.09 | 0.33  | [-0.50 , 1.16] | Non-inferiority not shown | 0.437  |
| 42 | [MoP] Exeter V40 Duraloc Cementless Cup                    | 355    | 2.15 | 1.40  | [-0.14 , 2.93] | Non-inferiority not shown | 0.075  |
| 43 | [MoP] Exeter V40 Elite Plus Cemented Cup                   | 1,212  | 0.84 | 0.08  | [-0.56 , 0.72] | Non-inferiority not shown | 0.809  |
| 44 | [MoP] Exeter V40 Elite Plus Ogee                           | 5,579  | 0.96 | 0.21  | [-0.29 , 0.70] | Non-inferiority not shown | 0.413  |
| 45 | [MoP] Exeter V40 Exeter Contemporary Flanged               | 13,647 | 1.12 | 0.36  | [-0.09 , 0.82] | Non-inferiority not shown | 0.118  |
| 46 | [MoP] Exeter V40 Exeter Contemporary Hooded                | 5,115  | 1.83 | 1.07  | [ 0.53 , 1.60] | Inferior by $\geq 20\%$   | <0.001 |



|    |                                                               |       |      |       |                |                           |        |
|----|---------------------------------------------------------------|-------|------|-------|----------------|---------------------------|--------|
| 1  | [MoP] Exeter V40 Exeter Duration                              | 4,042 | 1.60 | 0.85  | [ 0.29 , 1.41] | Inferior by $\geq 20\%$   | 0.003  |
| 2  | [MoP] Exeter V40 Exeter X3 Rimfit                             | 1,854 | 1.41 | 0.65  | [ 0.06 , 1.24] | Non-inferiority not shown | 0.031  |
| 3  | [MoP] Exeter V40 Marathon                                     | 418   | 1.41 | 0.65  | [-0.32 , 1.61] | Non-inferiority not shown | 0.188  |
| 4  | [MoP] Exeter V40 Opera                                        | 714   | 1.04 | 0.28  | [-0.56 , 1.11] | Non-inferiority not shown | 0.514  |
| 5  | [MoP] Exeter V40 Pinnacle                                     | 784   | 1.67 | 0.91  | [ 0.08 , 1.75] | Non-inferiority not shown | 0.033  |
| 6  | [MoP] Exeter V40 Reflection Cementless                        | 729   | 1.79 | 1.04  | [ 0.01 , 2.06] | Non-inferiority not shown | 0.048  |
| 7  | [MoP] Exeter V40 Trident                                      | 6,504 | 1.31 | 0.55  | [ 0.07 , 1.04] | Non-inferiority not shown | 0.025  |
| 8  | [MoP] Exeter V40 Trilogy                                      | 3,337 | 1.06 | 0.31  | [-0.23 , 0.85] | Non-inferiority not shown | 0.265  |
| 9  | [MoP] Exeter V40 Ultima Cemented Cup                          | 363   | 2.49 | 1.73  | [ 0.15 , 3.32] | Non-inferiority not shown | 0.032  |
| 10 | [MoP] Furlong Cemented Stem JRI Cemented Cup                  | 443   | 1.25 | 0.50  | [-0.59 , 1.58] | Non-inferiority not shown | 0.370  |
| 11 | [MoP] Furlong HAC Stem CSF                                    | 2,566 | 1.90 | 1.14  | [ 0.49 , 1.79] | Inferior by $\geq 20\%$   | 0.001  |
| 12 | [MoP] Furlong HAC Stem Furlong HAC CSF Plus                   | 1,170 | 2.43 | 1.68  | [ 0.85 , 2.50] | Inferior by $\geq 100\%$  | <0.001 |
| 13 | [MoP] M/L Taper Cementless Allofit                            | 339   | 1.83 | 1.08  | [-0.26 , 2.41] | Non-inferiority not shown | 0.113  |
| 14 | [MoP] Muller Straight Stem Original ME Muller Low Profile Cup | 414   | 0.52 | -0.24 | [-0.97 , 0.49] | Non-inferiority not shown | 0.522  |
| 15 | [MoP] Muller-Biomet Apollo                                    | 748   | 1.13 | 0.37  | [-0.48 , 1.22] | Non-inferiority not shown | 0.395  |
| 16 | [MoP] Omnifit Cemented Stem ODC                               | 267   | 1.04 | 0.28  | [-0.96 , 1.52] | Non-inferiority not shown | 0.661  |
| 17 | [MoP] Polarstem Cementless R3 Cementless                      | 476   | 1.24 | 0.48  | [-0.21 , 1.18] | Non-inferiority not shown | 0.174  |
| 18 | [MoP] SL-Plus Cementless Stem EP-Fit Plus                     | 826   | 2.89 | 2.13  | [ 1.01 , 3.26] | Inferior by $\geq 100\%$  | <0.001 |
| 19 | [MoP] Stanmore Modular Stem SHP Cup                           | 267   | 0.99 | 0.23  | [-0.97 , 1.44] | Non-inferiority not shown | 0.702  |
| 20 | [MoP] Stanmore Modular Stem Stanmore-Arcom Cup                | 1,070 | 1.02 | 0.26  | [-0.44 , 0.97] | Non-inferiority not shown | 0.461  |
| 21 | [MoP] Synergy Cementless Stem R3 Cementless                   | 503   | 1.52 | 0.76  | [-0.10 , 1.63] | Non-inferiority not shown | 0.083  |
| 22 | [MoP] Synergy Cementless Stem Reflection Cementless           | 591   | 1.14 | 0.38  | [-0.56 , 1.32] | Non-inferiority not shown | 0.429  |
| 23 | [MoP] Taperloc Cementless Stem Exceed ABT                     | 1,447 | 1.40 | 0.64  | [ 0.00 , 1.28] | Non-inferiority not shown | 0.049  |
| 24 | [MoP] Versys Cementless Stem Trilogy                          | 369   | 4.30 | 3.54  | [ 1.49 , 5.58] | Inferior by $\geq 100\%$  | 0.001  |

**Supplemental table 6b: Difference in Kaplan-Meier failure estimate between a contemporary reference and implants with at least 250 at risk at 5 years since primary in males**

| Stem/cup brand                                                | Number at risk | Cumulative failure (%) | Difference in failure (%) | 95% CI         | Equivalence status        | p-value |
|---------------------------------------------------------------|----------------|------------------------|---------------------------|----------------|---------------------------|---------|
| [MoP] Exeter V40 Elite Plus Ogee                              | 4,143          | 1.29                   | [REFERENCE]               |                |                           |         |
| [CoC] ABG II Monolithic Cementless Stem ABG II Cementless Cup | 536            | 2.75                   | 1.47                      | [ 0.11 , 2.82] | Non-inferiority not shown | 0.035   |
| [CoC] ABG II Monolithic Cementless Stem Trident               | 463            | 3.15                   | 1.86                      | [ 0.36 , 3.37] | Inferior by $\geq 20\%$   | 0.015   |
| [CoC] Accolade Trident                                        | 2,264          | 3.15                   | 1.87                      | [ 1.19 , 2.54] | Inferior by $\geq 20\%$   | <0.001  |
| [CoC] Bimetric Cementless Stem Exceed ABT                     | 259            | 1.75                   | 0.46                      | [-0.86 , 1.79] | Non-inferiority not shown | 0.494   |
| [CoC] Corail DeltaMotion                                      | 261            | 1.91                   | 0.62                      | [-0.59 , 1.83] | Non-inferiority not shown | 0.315   |
| [CoC] Corail Duraloc Option                                   | 449            | 3.36                   | 2.07                      | [ 0.43 , 3.72] | Inferior by $\geq 20\%$   | 0.013   |
| [CoC] Corail Pinnacle                                         | 7,860          | 2.68                   | 1.40                      | [ 1.01 , 1.79] | Inferior by $\geq 20\%$   | <0.001  |
| [CoC] Exeter V40 ABG II Cementless Cup                        | 379            | 1.39                   | 0.10                      | [-0.97 , 1.17] | Non-inferiority not shown | 0.852   |
| [CoC] Exeter V40 Trident                                      | 3,289          | 1.81                   | 0.52                      | [ 0.04 , 1.00] | Non-inferiority not shown | 0.034   |
| [CoC] Furlong HAC Stem CSF                                    | 664            | 3.19                   | 1.91                      | [ 0.59 , 3.22] | Inferior by $\geq 20\%$   | 0.005   |
| [CoC] Furlong HAC Stem Furlong HAC CSF Plus                   | 2,393          | 1.91                   | 0.62                      | [ 0.15 , 1.10] | Non-inferiority not shown | 0.010   |
| [CoC] M/L Taper Cementless Continuum                          | 304            | 1.73                   | 0.44                      | [-0.42 , 1.31] | Non-inferiority not shown | 0.316   |
| [CoC] SL-Plus Cementless Stem EP-Fit Plus                     | 551            | 6.43                   | 5.14                      | [ 3.22 , 7.07] | Inferior by $\geq 100\%$  | <0.001  |

|    |                                                            |       |      |       |                 |                           |        |
|----|------------------------------------------------------------|-------|------|-------|-----------------|---------------------------|--------|
| 1  | [CoC] Taperloc Cementless Stem Exceed ABT                  | 1,657 | 1.87 | 0.59  | [ 0.07 , 1.11]  | Non-inferiority not shown | 0.027  |
| 2  | [CoP] Accolade Trident                                     | 544   | 2.06 | 0.77  | [ 0.05 , 1.50]  | Non-inferiority not shown | 0.037  |
| 3  | [CoP] C-Stem Cemented Stem Opera                           | 283   | 1.49 | 0.21  | [-1.13 , 1.54]  | Non-inferiority not shown | 0.759  |
| 4  | [CoP] C-Stem Cemented Stem Wroblewski Golf Ball            | 321   | 1.47 | 0.18  | [-1.03 , 1.39]  | Non-inferiority not shown | 0.769  |
| 5  | [CoP] Corail Pinnacle                                      | 1,695 | 1.78 | 0.49  | [ 0.01 , 0.98]  | Non-inferiority not shown | 0.047  |
| 6  | [CoP] Exeter V40 Elite Plus Ogee                           | 381   | 1.11 | -0.18 | [-1.06 , 0.71]  | Non-inferiority not shown | 0.697  |
| 7  | [CoP] Exeter V40 Exeter Contemporary Flanged               | 789   | 0.85 | -0.44 | [-0.98 , 0.11]  | Non-inferior              | 0.116  |
| 8  | [CoP] Exeter V40 Exeter Duration                           | 261   | 1.01 | -0.28 | [-1.46 , 0.90]  | Non-inferiority not shown | 0.641  |
| 9  | [CoP] Exeter V40 Trident                                   | 891   | 0.96 | -0.33 | [-0.79 , 0.13]  | Non-inferior              | 0.162  |
| 10 | [CoP] Exeter V40 Trilogy                                   | 631   | 2.00 | 0.72  | [-0.27 , 1.71]  | Non-inferiority not shown | 0.154  |
| 11 | [CoP] Furlong HAC Stem CSF                                 | 2,209 | 1.39 | 0.10  | [-0.42 , 0.62]  | Non-inferiority not shown | 0.703  |
| 12 | [CoP] Furlong HAC Stem Furlong HAC CSF Plus                | 400   | 1.38 | 0.10  | [-0.69 , 0.88]  | Non-inferiority not shown | 0.809  |
| 13 | [CoP] MS-30 Original ME Muller Low Profile Cup             | 330   | 0.35 | -0.94 | [-1.50 , -0.38] | Non-inferior              | 0.001  |
| 14 | [CoP] SL-Plus Cementless Stem Bicon-Plus                   | 253   | 4.74 | 3.46  | [ 1.01 , 5.90]  | Inferior by $\geq 20\%$   | 0.006  |
| 15 | [CoP] SL-Plus Cementless Stem EP-Fit Plus                  | 312   | 3.28 | 1.99  | [ 0.14 , 3.85]  | Non-inferiority not shown | 0.035  |
| 16 | [CoP] Taperloc Cementless Stem Exceed ABT                  | 309   | 1.70 | 0.42  | [-0.54 , 1.37]  | Non-inferiority not shown | 0.391  |
| 17 | [MoP] Accolade Trident                                     | 2,404 | 3.37 | 2.08  | [ 1.45 , 2.71]  | Inferior by $\geq 100\%$  | <0.001 |
| 18 | [MoP] C-Stem AMT Cemented Stem Charnley and Elite Plus LPW | 444   | 1.81 | 0.52  | [-0.44 , 1.47]  | Non-inferiority not shown | 0.286  |
| 19 | [MoP] C-Stem AMT Cemented Stem Elite Plus Ogee             | 253   | 0.61 | -0.68 | [-1.34 , -0.01] | Non-inferior              | 0.045  |
| 20 | [MoP] C-Stem Cemented Stem Charnley and Elite Plus LPW     | 429   | 1.01 | -0.27 | [-1.20 , 0.66]  | Non-inferiority not shown | 0.564  |
| 21 | [MoP] C-Stem Cemented Stem Elite Plus Ogee                 | 906   | 1.28 | 0.00  | [-0.66 , 0.66]  | Non-inferiority not shown | 0.997  |
| 22 | [MoP] C-Stem Cemented Stem Marathon                        | 274   | 1.82 | 0.54  | [-0.48 , 1.55]  | Non-inferiority not shown | 0.300  |
| 23 | [MoP] C-Stem Cemented Stem Opera                           | 389   | 2.23 | 0.94  | [-0.34 , 2.23]  | Non-inferiority not shown | 0.149  |
| 24 | [MoP] C-Stem Cemented Stem Wroblewski Golf Ball            | 269   | 1.29 | 0.00  | [-1.16 , 1.16]  | Non-inferiority not shown | 0.999  |
| 25 | [MoP] CPCS Opera                                           | 281   | 0.51 | -0.77 | [-1.54 , -0.01] | Non-inferior              | 0.048  |
| 26 | [MoP] CPT Elite Plus Ogee                                  | 630   | 2.35 | 1.07  | [ 0.02 , 2.11]  | Non-inferiority not shown | 0.046  |
| 27 | [MoP] CPT Trilogy                                          | 1,862 | 2.39 | 1.11  | [ 0.50 , 1.71]  | Inferior by $\geq 20\%$   | <0.001 |
| 28 | [MoP] CPT ZCA                                              | 1,549 | 2.42 | 1.13  | [ 0.46 , 1.80]  | Inferior by $\geq 20\%$   | 0.001  |
| 29 | [MoP] Charnley Cemented Stem Charnley Cemented Cup         | 1,338 | 2.22 | 0.93  | [ 0.15 , 1.71]  | Non-inferiority not shown | 0.019  |
| 30 | [MoP] Charnley Cemented Stem Charnley Ogee                 | 2,824 | 2.29 | 1.00  | [ 0.42 , 1.58]  | Inferior by $\geq 20\%$   | 0.001  |
| 31 | [MoP] Charnley Cemented Stem Charnley and Elite Plus LPW   | 1,414 | 1.42 | 0.14  | [-0.49 , 0.76]  | Non-inferiority not shown | 0.667  |
| 32 | [MoP] Charnley Cemented Stem Opera                         | 343   | 1.68 | 0.40  | [-0.88 , 1.67]  | Non-inferiority not shown | 0.540  |
| 33 | [MoP] Charnley Cemented Stem Wroblewski Golf Ball          | 311   | 1.75 | 0.47  | [-0.86 , 1.79]  | Non-inferiority not shown | 0.489  |
| 34 | [MoP] Corail Duraloc Cementless Cup                        | 1,204 | 2.54 | 1.25  | [ 0.36 , 2.14]  | Inferior by $\geq 20\%$   | 0.006  |
| 35 | [MoP] Corail Elite Plus Ogee                               | 352   | 1.79 | 0.50  | [-0.66 , 1.66]  | Non-inferiority not shown | 0.397  |
| 36 | [MoP] Corail Marathon                                      | 465   | 1.77 | 0.48  | [-0.28 , 1.24]  | Non-inferiority not shown | 0.216  |
| 37 | [MoP] Corail Pinnacle                                      | 6,318 | 1.91 | 0.63  | [ 0.26 , 0.99]  | Inferior by $\geq 20\%$   | 0.001  |
| 38 | [MoP] Corail Trilogy                                       | 526   | 2.48 | 1.20  | [ 0.01 , 2.38]  | Non-inferiority not shown | 0.047  |
| 39 | [MoP] Exeter V40 Cenator Cemented Cup                      | 573   | 1.74 | 0.45  | [-0.53 , 1.43]  | Non-inferiority not shown | 0.366  |
| 40 | [MoP] Exeter V40 Charnley and Elite Plus LPW               | 504   | 1.09 | -0.20 | [-0.97 , 0.57]  | Non-inferiority not shown | 0.612  |
| 41 | [MoP] Exeter V40 Duraloc Cementless Cup                    | 330   | 2.45 | 1.16  | [-0.44 , 2.77]  | Non-inferiority not shown | 0.156  |
| 42 | [MoP] Exeter V40 Elite Plus Cemented Cup                   | 906   | 1.20 | -0.09 | [-0.74 , 0.57]  | Non-inferiority not shown | 0.797  |
| 43 | [MoP] Exeter V40 Exeter Contemporary Flanged               | 8,757 | 1.54 | 0.26  | [-0.09 , 0.60]  | Non-inferiority not shown | 0.145  |
| 44 | [MoP] Exeter V40 Exeter Contemporary Hooded                | 3,570 | 2.27 | 0.98  | [ 0.51 , 1.45]  | Inferior by $\geq 20\%$   | <0.001 |
| 45 | [MoP] Exeter V40 Exeter Duration                           | 3,104 | 2.30 | 1.02  | [ 0.49 , 1.54]  | Inferior by $\geq 20\%$   | <0.001 |
| 46 | [MoP] Exeter V40 Exeter X3 Rimfit                          | 309   | 1.61 | 0.33  | [-0.31 , 0.96]  | Non-inferiority not shown | 0.314  |

|    |                                                               |       |      |       |                |                           |        |
|----|---------------------------------------------------------------|-------|------|-------|----------------|---------------------------|--------|
| 1  | [MoP] Exeter V40 Opera                                        | 515   | 1.66 | 0.37  | [-0.61 , 1.35] | Non-inferiority not shown | 0.457  |
| 2  | [MoP] Exeter V40 Pinnacle                                     | 471   | 2.43 | 1.14  | [ 0.13 , 2.15] | Non-inferiority not shown | 0.027  |
| 3  | [MoP] Exeter V40 Reflection Cementless                        | 649   | 2.49 | 1.21  | [ 0.06 , 2.35] | Non-inferiority not shown | 0.039  |
| 4  | [MoP] Exeter V40 Trident                                      | 3,769 | 1.68 | 0.40  | [-0.00 , 0.80] | Non-inferiority not shown | 0.051  |
| 5  | [MoP] Exeter V40 Trilogy                                      | 2,555 | 1.46 | 0.18  | [-0.31 , 0.66] | Non-inferiority not shown | 0.473  |
| 6  | [MoP] Exeter V40 Ultima Cemented Cup                          | 321   | 2.77 | 1.48  | [-0.16 , 3.12] | Non-inferiority not shown | 0.077  |
| 7  | [MoP] Furlong Cemented Stem JRI Cemented Cup                  | 396   | 1.48 | 0.19  | [-0.93 , 1.32] | Non-inferiority not shown | 0.735  |
| 8  | [MoP] Furlong HAC Stem CSF                                    | 2,076 | 2.31 | 1.02  | [ 0.40 , 1.64] | Inferior by $\geq 20\%$   | 0.001  |
| 9  | [MoP] Furlong HAC Stem Furlong HAC CSF Plus                   | 686   | 3.15 | 1.86  | [ 0.94 , 2.79] | Inferior by $\geq 20\%$   | <0.001 |
| 10 | [MoP] Muller Straight Stem Original ME Muller Low Profile Cup | 291   | 0.78 | -0.51 | [-1.33 , 0.31] | Non-inferiority not shown | 0.224  |
| 11 | [MoP] Muller-Biomet Apollo                                    | 568   | 1.27 | -0.02 | [-0.85 , 0.81] | Non-inferiority not shown | 0.967  |
| 12 | [MoP] SL-Plus Cementless Stem EP-Fit Plus                     | 672   | 4.08 | 2.79  | [ 1.48 , 4.11] | Inferior by $\geq 100\%$  | <0.001 |
| 13 | [MoP] Stanmore Modular Stem Stanmore-Arcom Cup                | 805   | 1.43 | 0.15  | [-0.59 , 0.89] | Non-inferiority not shown | 0.697  |
| 14 | [MoP] Synergy Cementless Stem Reflection Cementless           | 546   | 2.18 | 0.90  | [-0.31 , 2.10] | Non-inferiority not shown | 0.146  |
| 15 | [MoP] Taperloc Cementless Stem Exceed ABT                     | 657   | 1.71 | 0.42  | [-0.23 , 1.08] | Non-inferiority not shown | 0.208  |
| 16 | [MoP] Versys Cementless Stem Trilogy                          | 336   | 4.56 | 3.28  | [ 1.20 , 5.36] | Inferior by $\geq 20\%$   | 0.002  |

**Supplemental table 6c: Difference in Kaplan-Meier failure estimate between a contemporary reference and implants with at least 250 at risk at 7 years since primary in males**

| Stem/cup brand                                                | Number at risk | Cumulative failure (%) | Difference in failure (%) | 95% CI          | Equivalence status        | p-value |
|---------------------------------------------------------------|----------------|------------------------|---------------------------|-----------------|---------------------------|---------|
| [CoP] Furlong HAC Stem CSF                                    | 1,823          | 1.64                   | [REFERENCE]               |                 |                           |         |
| [CoC] ABG II Monolithic Cementless Stem ABG II Cementless Cup | 469            | 3.52                   | 1.89                      | [ 0.29 , 3.48]  | Non-inferiority not shown | 0.020   |
| [CoC] ABG II Monolithic Cementless Stem Trident               | 365            | 4.06                   | 2.42                      | [ 0.64 , 4.20]  | Inferior by $\geq 20\%$   | 0.008   |
| [CoC] Accolade Trident                                        | 1,234          | 3.47                   | 1.84                      | [ 1.01 , 2.66]  | Inferior by $\geq 20\%$   | <0.001  |
| [CoC] Corail Duraloc Option                                   | 354            | 4.27                   | 2.64                      | [ 0.74 , 4.54]  | Inferior by $\geq 20\%$   | 0.006   |
| [CoC] Corail Pinnacle                                         | 3,192          | 3.28                   | 1.64                      | [ 1.05 , 2.23]  | Inferior by $\geq 20\%$   | <0.001  |
| [CoC] Exeter V40 ABG II Cementless Cup                        | 304            | 1.98                   | 0.35                      | [-1.05 , 1.75]  | Non-inferiority not shown | 0.627   |
| [CoC] Exeter V40 Trident                                      | 2,289          | 2.18                   | 0.54                      | [-0.12 , 1.20]  | Non-inferiority not shown | 0.108   |
| [CoC] Furlong HAC Stem CSF                                    | 630            | 3.34                   | 1.71                      | [ 0.30 , 3.11]  | Non-inferiority not shown | 0.017   |
| [CoC] Furlong HAC Stem Furlong HAC CSF Plus                   | 913            | 2.10                   | 0.47                      | [-0.18 , 1.11]  | Non-inferiority not shown | 0.158   |
| [CoC] SL-Plus Cementless Stem EP-Fit Plus                     | 483            | 6.96                   | 5.33                      | [ 3.28 , 7.38]  | Inferior by $\geq 100\%$  | <0.001  |
| [CoC] Taperloc Cementless Stem Exceed ABT                     | 628            | 2.14                   | 0.51                      | [-0.23 , 1.24]  | Non-inferiority not shown | 0.175   |
| [CoP] C-Stem Cemented Stem Wroblewski Golf Ball               | 252            | 1.47                   | -0.17                     | [-1.44 , 1.11]  | Non-inferiority not shown | 0.796   |
| [CoP] Corail Pinnacle                                         | 611            | 2.30                   | 0.66                      | [-0.12 , 1.45]  | Non-inferiority not shown | 0.098   |
| [CoP] Exeter V40 Exeter Contemporary Flanged                  | 417            | 0.85                   | -0.79                     | [-1.46 , -0.11] | Non-inferior              | 0.022   |
| [CoP] Exeter V40 Trident                                      | 459            | 1.46                   | -0.18                     | [-1.01 , 0.65]  | Non-inferiority not shown | 0.676   |
| [CoP] Exeter V40 Trilogy                                      | 438            | 2.16                   | 0.53                      | [-0.58 , 1.64]  | Non-inferiority not shown | 0.351   |
| [MoP] Accolade Trident                                        | 1,060          | 4.24                   | 2.60                      | [ 1.71 , 3.49]  | Inferior by $\geq 100\%$  | <0.001  |
| [MoP] C-Stem Cemented Stem Charnley and Elite Plus LPW        | 384            | 1.01                   | -0.62                     | [-1.63 , 0.39]  | Non-inferiority not shown | 0.227   |
| [MoP] C-Stem Cemented Stem Elite Plus Ogee                    | 654            | 1.54                   | -0.09                     | [-0.94 , 0.76]  | Non-inferiority not shown | 0.830   |
| [MoP] C-Stem Cemented Stem Opera                              | 282            | 2.55                   | 0.92                      | [-0.56 , 2.40]  | Non-inferiority not shown | 0.225   |
| [MoP] CPT Elite Plus Ogee                                     | 436            | 2.51                   | 0.87                      | [-0.29 , 2.03]  | Non-inferiority not shown | 0.140   |
| [MoP] CPT Trilogy                                             | 1,134          | 2.68                   | 1.04                      | [ 0.28 , 1.81]  | Non-inferiority not shown | 0.008   |
| [MoP] CPT ZCA                                                 | 1,009          | 3.27                   | 1.63                      | [ 0.71 , 2.56]  | Inferior by $\geq 20\%$   | 0.001   |
| [MoP] Charnley Cemented Stem Charnley Cemented Cup            | 1,126          | 2.94                   | 1.31                      | [ 0.31 , 2.30]  | Non-inferiority not shown | 0.010   |
| [MoP] Charnley Cemented Stem Charnley Ogee                    | 2,211          | 3.41                   | 1.77                      | [ 0.96 , 2.58]  | Inferior by $\geq 20\%$   | <0.001  |
| [MoP] Charnley Cemented Stem Charnley and Elite Plus LPW      | 1,116          | 1.90                   | 0.26                      | [-0.57 , 1.09]  | Non-inferiority not shown | 0.539   |
| [MoP] Charnley Cemented Stem Wroblewski Golf Ball             | 256            | 2.09                   | 0.46                      | [-1.07 , 1.98]  | Non-inferiority not shown | 0.559   |
| [MoP] Corail Duraloc Cementless Cup                           | 967            | 3.62                   | 1.98                      | [ 0.84 , 3.13]  | Inferior by $\geq 20\%$   | 0.001   |
| [MoP] Corail Pinnacle                                         | 2,826          | 2.42                   | 0.79                      | [ 0.21 , 1.37]  | Non-inferiority not shown | 0.008   |
| [MoP] Corail Trilogy                                          | 323            | 3.87                   | 2.23                      | [ 0.58 , 3.89]  | Inferior by $\geq 20\%$   | 0.008   |
| [MoP] Exeter V40 Cenator Cemented Cup                         | 415            | 2.35                   | 0.71                      | [-0.55 , 1.97]  | Non-inferiority not shown | 0.267   |
| [MoP] Exeter V40 Charnley and Elite Plus LPW                  | 294            | 1.33                   | -0.30                     | [-1.29 , 0.68]  | Non-inferiority not shown | 0.547   |
| [MoP] Exeter V40 Elite Plus Cemented Cup                      | 608            | 1.20                   | -0.44                     | [-1.20 , 0.33]  | Non-inferiority not shown | 0.266   |
| [MoP] Exeter V40 Elite Plus Ogee                              | 2,790          | 1.68                   | 0.04                      | [-0.56 , 0.64]  | Non-inferiority not shown | 0.888   |
| [MoP] Exeter V40 Exeter Contemporary Flanged                  | 5,272          | 2.01                   | 0.37                      | [-0.18 , 0.92]  | Non-inferiority not shown | 0.183   |
| [MoP] Exeter V40 Exeter Contemporary Hooded                   | 2,263          | 2.84                   | 1.20                      | [ 0.53 , 1.88]  | Inferior by $\geq 20\%$   | <0.001  |
| [MoP] Exeter V40 Exeter Duration                              | 2,100          | 3.36                   | 1.72                      | [ 0.96 , 2.49]  | Inferior by $\geq 20\%$   | <0.001  |
| [MoP] Exeter V40 Opera                                        | 340            | 2.14                   | 0.50                      | [-0.75 , 1.75]  | Non-inferiority not shown | 0.432   |
| [MoP] Exeter V40 Reflection Cementless                        | 483            | 3.34                   | 1.70                      | [ 0.29 , 3.12]  | Non-inferiority not shown | 0.018   |

|    |                                                     |       |      |       |                |                           |        |
|----|-----------------------------------------------------|-------|------|-------|----------------|---------------------------|--------|
| 1  | [MoP] Exeter V40 Trident                            | 2,065 | 2.04 | 0.41  | [-0.20 , 1.01] | Non-inferiority not shown | 0.191  |
| 2  | [MoP] Exeter V40 Trilogy                            | 1,688 | 1.88 | 0.25  | [-0.44 , 0.93] | Non-inferiority not shown | 0.477  |
| 3  | [MoP] Exeter V40 Ultima Cemented Cup                | 282   | 2.77 | 1.13  | [-0.55 , 2.82] | Non-inferiority not shown | 0.188  |
| 4  | [MoP] Furlong Cemented Stem JRI Cemented Cup        | 312   | 1.77 | 0.13  | [-1.18 , 1.45] | Non-inferiority not shown | 0.843  |
| 5  | [MoP] Furlong HAC Stem CSF                          | 1,556 | 3.09 | 1.46  | [ 0.62 , 2.29] | Inferior by $\geq 20\%$   | 0.001  |
| 6  | [MoP] Furlong HAC Stem Furlong HAC CSF Plus         | 265   | 3.66 | 2.02  | [ 0.80 , 3.25] | Inferior by $\geq 20\%$   | 0.001  |
| 7  | [MoP] Muller-Biomet Apollo                          | 376   | 1.46 | -0.18 | [-1.17 , 0.81] | Non-inferiority not shown | 0.722  |
| 8  | [MoP] SL-Plus Cementless Stem EP-Fit Plus           | 483   | 5.32 | 3.69  | [ 2.08 , 5.29] | Inferior by $\geq 100\%$  | <0.001 |
| 9  | [MoP] Stanmore Modular Stem Stanmore-Arcom Cup      | 529   | 1.86 | 0.23  | [-0.74 , 1.20] | Non-inferiority not shown | 0.644  |
| 10 | [MoP] Synergy Cementless Stem Reflection Cementless | 396   | 2.37 | 0.73  | [-0.59 , 2.05] | Non-inferiority not shown | 0.277  |
| 11 | [MoP] Versys Cementless Stem Trilogy                | 297   | 4.56 | 2.93  | [ 0.81 , 5.05] | Inferior by $\geq 20\%$   | 0.007  |

For peer review only

11  
12  
13  
14  
15  
16  
17  
18  
19  
20  
21  
22  
23  
24  
25  
26  
27  
28  
29  
30  
31  
32  
33  
34  
35  
36  
37  
38  
39  
40  
41  
42  
43  
44  
45  
46

**Supplemental table 6d: Difference in Kaplan-Meier failure estimate between a contemporary reference and implants with at least 250 at risk at 10 years since primary in males**

| Stem/cup brand                                                | Number at risk | Cumulative failure (%) | Difference in failure (%) | 95% CI         | Equivalence status        | p-value |
|---------------------------------------------------------------|----------------|------------------------|---------------------------|----------------|---------------------------|---------|
| [CoP] Furlong HAC Stem CSF                                    | 1,054          | 2.03                   | [REFERENCE]               |                |                           |         |
| [CoC] ABG II Monolithic Cementless Stem ABG II Cementless Cup | 348            | 5.43                   | 3.40                      | [ 1.33 , 5.47] | Inferior by $\geq 20\%$   | 0.001   |
| [CoC] Corail Pinnacle                                         | 363            | 4.24                   | 2.21                      | [ 1.28 , 3.15] | Inferior by $\geq 20\%$   | <0.001  |
| [CoC] Exeter V40 Trident                                      | 767            | 2.76                   | 0.74                      | [-0.10 , 1.57] | Non-inferiority not shown | 0.083   |
| [CoC] Furlong HAC Stem CSF                                    | 360            | 4.28                   | 2.25                      | [ 0.60 , 3.90] | Inferior by $\geq 20\%$   | 0.008   |
| [MoP] C-Stem Cemented Stem Elite Plus Ogee                    | 313            | 2.71                   | 0.68                      | [-0.63 , 1.98] | Non-inferiority not shown | 0.308   |
| [MoP] CPT Trilogy                                             | 382            | 4.61                   | 2.58                      | [ 1.24 , 3.92] | Inferior by $\geq 20\%$   | <0.001  |
| [MoP] CPT ZCA                                                 | 332            | 4.41                   | 2.38                      | [ 1.15 , 3.61] | Inferior by $\geq 20\%$   | <0.001  |
| [MoP] Charnley Cemented Stem Charnley Cemented Cup            | 615            | 4.69                   | 2.66                      | [ 1.32 , 4.00] | Inferior by $\geq 20\%$   | <0.001  |
| [MoP] Charnley Cemented Stem Charnley Ogee                    | 1,151          | 5.08                   | 3.05                      | [ 2.00 , 4.10] | Inferior by $\geq 20\%$   | <0.001  |
| [MoP] Charnley Cemented Stem Charnley and Elite Plus LPW      | 661            | 2.93                   | 0.90                      | [-0.21 , 2.01] | Non-inferiority not shown | 0.114   |
| [MoP] Corail Duraloc Cementless Cup                           | 418            | 6.69                   | 4.66                      | [ 2.92 , 6.41] | Inferior by $\geq 100\%$  | <0.001  |
| [MoP] Corail Pinnacle                                         | 638            | 3.49                   | 1.47                      | [ 0.63 , 2.30] | Inferior by $\geq 20\%$   | 0.001   |
| [MoP] Exeter V40 Elite Plus Ogee                              | 1,105          | 2.53                   | 0.51                      | [-0.31 , 1.32] | Non-inferiority not shown | 0.226   |
| [MoP] Exeter V40 Exeter Contemporary Flanged                  | 1,517          | 2.88                   | 0.85                      | [ 0.13 , 1.57] | Non-inferiority not shown | 0.020   |
| [MoP] Exeter V40 Exeter Contemporary Hooded                   | 760            | 4.17                   | 2.15                      | [ 1.19 , 3.11] | Inferior by $\geq 20\%$   | <0.001  |
| [MoP] Exeter V40 Exeter Duration                              | 888            | 4.95                   | 2.92                      | [ 1.88 , 3.96] | Inferior by $\geq 20\%$   | <0.001  |
| [MoP] Exeter V40 Trident                                      | 402            | 2.84                   | 0.81                      | [-0.12 , 1.74] | Non-inferiority not shown | 0.089   |
| [MoP] Exeter V40 Trilogy                                      | 583            | 3.02                   | 0.99                      | [ 0.02 , 1.96] | Non-inferiority not shown | 0.045   |
| [MoP] Furlong HAC Stem CSF                                    | 609            | 4.76                   | 2.73                      | [ 1.56 , 3.90] | Inferior by $\geq 20\%$   | <0.001  |

**Supplemental table 7a: Difference in Kaplan-Meier failure estimate between a contemporary reference and implants with at least 250 at risk at 3 years since primary in males <55 years**

| Stem/cup brand                              | Number at risk | Cumulative failure (%) | Difference in failure (%) | 95% CI         | Equivalence status        | p-value |
|---------------------------------------------|----------------|------------------------|---------------------------|----------------|---------------------------|---------|
| [CoC] Exeter V40 Trident                    | 1,269          | 1.26                   | [REFERENCE]               |                |                           |         |
| [CoC] Accolade Trident                      | 730            | 2.96                   | 1.70                      | [ 0.41 , 3.00] | Inferior by $\geq 20\%$   | 0.010   |
| [CoC] Corail Pinnacle                       | 3,796          | 2.29                   | 1.03                      | [ 0.33 , 1.74] | Inferior by $\geq 20\%$   | 0.004   |
| [CoC] Furlong HAC Stem Furlong HAC CSF Plus | 837            | 1.71                   | 0.46                      | [-0.49 , 1.41] | Non-inferiority not shown | 0.345   |
| [CoC] M/L Taper Cementless Continuum        | 296            | 2.21                   | 0.95                      | [-0.59 , 2.49] | Non-inferiority not shown | 0.226   |
| [CoC] Taperloc Cementless Stem Exceed ABT   | 836            | 2.23                   | 0.98                      | [-0.05 , 2.00] | Non-inferiority not shown | 0.062   |
| [CoP] Accolade Trident                      | 251            | 2.12                   | 0.87                      | [-0.64 , 2.37] | Non-inferiority not shown | 0.259   |
| [CoP] Corail Pinnacle                       | 509            | 1.90                   | 0.64                      | [-0.34 , 1.62] | Non-inferiority not shown | 0.201   |
| [CoP] Exeter V40 Trident                    | 369            | 0.81                   | -0.44                     | [-1.25 , 0.37] | Non-inferiority not shown | 0.286   |
| [MoP] Corail Pinnacle                       | 417            | 1.20                   | -0.06                     | [-1.12 , 1.00] | Non-inferiority not shown | 0.915   |

Supplemental table 7b: Difference in Kaplan-Meier failure estimate between a contemporary reference and implants with at least 250 at risk at 5 years since primary in males <55 years

| Stem/cup brand                              | Number at risk | Cumulative failure (%) | Difference in failure (%) | 95% CI          | Equivalence status        | p-value |
|---------------------------------------------|----------------|------------------------|---------------------------|-----------------|---------------------------|---------|
| [CoC] Corail Pinnacle                       | 2,313          | 3.33                   | [REFERENCE]               |                 |                           |         |
| [CoC] Accolade Trident                      | 502            | 4.15                   | 0.82                      | [-0.70 , 2.34]  | Non-inferiority not shown | 0.290   |
| [CoC] Exeter V40 Trident                    | 934            | 1.87                   | -1.46                     | [-2.36 , -0.56] | Non-inferior              | 0.001   |
| [CoC] Furlong HAC Stem Furlong HAC CSF Plus | 494            | 1.85                   | -1.48                     | [-2.45 , -0.50] | Non-inferior              | 0.003   |
| [CoC] Taperloc Cementless Stem Exceed ABT   | 430            | 2.57                   | -0.76                     | [-1.88 , 0.35]  | Non-inferior              | 0.179   |



**Supplemental table 8a: Difference in Kaplan-Meier failure estimate between a contemporary reference and implants with at least 250 at risk at 3 years since primary in males between 55 and 75 years**

| Stem/cup brand                                                | Number at risk | Cumulative failure (%) | Difference in failure (%) | 95% CI          | Equivalence status        | p-value |
|---------------------------------------------------------------|----------------|------------------------|---------------------------|-----------------|---------------------------|---------|
| [CoP] Exeter V40 Trident                                      | 1,339          | 0.83                   | [REFERENCE]               |                 |                           |         |
| [CoC] ABG II Monolithic Cementless Stem ABG II Cementless Cup | 408            | 2.58                   | 1.75                      | [ 0.21 , 3.30]  | Inferior by $\geq 20\%$   | 0.026   |
| [CoC] ABG II Monolithic Cementless Stem Trident               | 368            | 1.82                   | 0.99                      | [-0.39 , 2.37]  | Non-inferiority not shown | 0.159   |
| [CoC] Accolade Trident                                        | 2,101          | 2.16                   | 1.33                      | [ 0.64 , 2.02]  | Inferior by $\geq 20\%$   | <0.001  |
| [CoC] Bimetric Cementless Stem Exceed ABT                     | 279            | 0.60                   | -0.22                     | [-1.13 , 0.68]  | Non-inferiority not shown | 0.628   |
| [CoC] Corail Duraloc Option                                   | 311            | 1.86                   | 1.04                      | [-0.48 , 2.55]  | Non-inferiority not shown | 0.181   |
| [CoC] Corail Pinnacle                                         | 8,280          | 1.71                   | 0.89                      | [ 0.46 , 1.31]  | Inferior by $\geq 20\%$   | <0.001  |
| [CoC] Excia Cementless Plasmacup SC                           | 284            | 1.25                   | 0.42                      | [-0.72 , 1.57]  | Non-inferiority not shown | 0.468   |
| [CoC] Exeter V40 ABG II Cementless Cup                        | 324            | 0.80                   | -0.03                     | [-0.99 , 0.93]  | Non-inferiority not shown | 0.949   |
| [CoC] Exeter V40 Trident                                      | 2,957          | 1.06                   | 0.23                      | [-0.26 , 0.72]  | Non-inferiority not shown | 0.350   |
| [CoC] Furlong HAC Stem CSF                                    | 452            | 3.36                   | 2.53                      | [ 0.88 , 4.19]  | Inferior by $\geq 100\%$  | 0.003   |
| [CoC] Furlong HAC Stem Furlong HAC CSF Plus                   | 2,839          | 1.63                   | 0.80                      | [ 0.27 , 1.33]  | Inferior by $\geq 20\%$   | 0.003   |
| [CoC] M/L Taper Cementless Continuum                          | 405            | 1.41                   | 0.58                      | [-0.45 , 1.61]  | Non-inferiority not shown | 0.269   |
| [CoC] Polarstem Cementless R3 Cementless                      | 256            | 0.54                   | -0.29                     | [-1.11 , 0.54]  | Non-inferiority not shown | 0.496   |
| [CoC] SL-Plus Cementless Stem EP-Fit Plus                     | 398            | 4.90                   | 4.07                      | [ 2.00 , 6.14]  | Inferior by $\geq 100\%$  | <0.001  |
| [CoC] Taperloc Cementless Stem Exceed ABT                     | 2,008          | 1.40                   | 0.58                      | [ 0.02 , 1.13]  | Non-inferiority not shown | 0.041   |
| [CoP] Accolade Trident                                        | 975            | 1.56                   | 0.73                      | [ 0.03 , 1.44]  | Non-inferiority not shown | 0.042   |
| [CoP] C-Stem Cemented Stem Marathon                           | 344            | 0.69                   | -0.14                     | [-0.92 , 0.64]  | Non-inferiority not shown | 0.726   |
| [CoP] C-Stem Cemented Stem Wroblewski Golf Ball               | 273            | 0.31                   | -0.52                     | [-1.21 , 0.17]  | Non-inferiority not shown | 0.142   |
| [CoP] CPT Trilogy                                             | 274            | 1.73                   | 0.90                      | [-0.14 , 1.94]  | Non-inferiority not shown | 0.089   |
| [CoP] Corail Marathon                                         | 368            | 1.84                   | 1.02                      | [-0.12 , 2.15]  | Non-inferiority not shown | 0.079   |
| [CoP] Corail Pinnacle                                         | 2,678          | 0.94                   | 0.11                      | [-0.33 , 0.54]  | Non-inferiority not shown | 0.630   |
| [CoP] Exeter V40 Charnley and Elite Plus LPW                  | 275            | 1.16                   | 0.33                      | [-0.85 , 1.52]  | Non-inferiority not shown | 0.585   |
| [CoP] Exeter V40 Elite Plus Ogee                              | 420            | 0.56                   | -0.27                     | [-0.99 , 0.45]  | Non-inferiority not shown | 0.467   |
| [CoP] Exeter V40 Exeter Contemporary Flanged                  | 919            | 0.88                   | 0.06                      | [-0.57 , 0.68]  | Non-inferiority not shown | 0.862   |
| [CoP] Exeter V40 Exeter X3 Rimfit                             | 649            | 1.27                   | 0.44                      | [-0.27 , 1.15]  | Non-inferiority not shown | 0.225   |
| [CoP] Exeter V40 Trilogy                                      | 599            | 1.36                   | 0.53                      | [-0.42 , 1.48]  | Non-inferiority not shown | 0.274   |
| [CoP] Furlong HAC Stem CSF                                    | 1,990          | 0.93                   | 0.11                      | [-0.43 , 0.64]  | Non-inferiority not shown | 0.699   |
| [CoP] Furlong HAC Stem Furlong HAC CSF Plus                   | 563            | 1.40                   | 0.58                      | [-0.29 , 1.44]  | Non-inferiority not shown | 0.193   |
| [CoP] MS-30 Original ME Muller Low Profile Cup                | 375            | 0.21                   | -0.62                     | [-1.16 , -0.07] | Non-inferior              | 0.026   |
| [CoP] SL-Plus Cementless Stem EP-Fit Plus                     | 268            | 1.45                   | 0.62                      | [-0.83 , 2.07]  | Non-inferiority not shown | 0.404   |
| [CoP] Taperloc Cementless Stem Exceed ABT                     | 601            | 1.04                   | 0.21                      | [-0.48 , 0.89]  | Non-inferiority not shown | 0.552   |
| [MoP] Accolade Trident                                        | 2,467          | 2.30                   | 1.47                      | [ 0.83 , 2.12]  | Inferior by $\geq 100\%$  | <0.001  |
| [MoP] Anthology R3 Cementless                                 | 292            | 2.08                   | 1.25                      | [ 0.01 , 2.49]  | Non-inferiority not shown | 0.048   |
| [MoP] C-Stem AMT Cemented Stem Charnley and Elite Plus LPW    | 419            | 1.68                   | 0.85                      | [-0.36 , 2.06]  | Non-inferiority not shown | 0.167   |
| [MoP] C-Stem AMT Cemented Stem Marathon                       | 256            | 1.18                   | 0.35                      | [-0.62 , 1.32]  | Non-inferiority not shown | 0.475   |
| [MoP] C-Stem AMT Cemented Stem Pinnacle                       | 322            | 1.15                   | 0.32                      | [-0.55 , 1.19]  | Non-inferiority not shown | 0.474   |
| [MoP] C-Stem Cemented Stem Charnley and Elite Plus LPW        | 322            | 1.16                   | 0.34                      | [-0.85 , 1.52]  | Non-inferiority not shown | 0.579   |
| [MoP] C-Stem Cemented Stem Elite Plus Ogee                    | 830            | 1.26                   | 0.43                      | [-0.36 , 1.23]  | Non-inferiority not shown | 0.283   |

|    |                                                          |       |      |       |                |                           |        |
|----|----------------------------------------------------------|-------|------|-------|----------------|---------------------------|--------|
| 1  | [MoP] C-Stem Cemented Stem Marathon                      | 418   | 1.27 | 0.44  | [-0.53 , 1.41] | Non-inferiority not shown | 0.372  |
| 2  | [MoP] C-Stem Cemented Stem Opera                         | 391   | 1.47 | 0.64  | [-0.58 , 1.86] | Non-inferiority not shown | 0.301  |
| 3  | [MoP] CPT Elite Plus Ogee                                | 550   | 1.47 | 0.64  | [-0.37 , 1.65] | Non-inferiority not shown | 0.217  |
| 4  | [MoP] CPT Trilogy                                        | 1,745 | 1.63 | 0.80  | [ 0.18 , 1.42] | Inferior by $\geq 20\%$   | 0.012  |
| 5  | [MoP] CPT ZCA                                            | 1,031 | 1.26 | 0.43  | [-0.25 , 1.12] | Non-inferiority not shown | 0.213  |
| 6  | [MoP] Charnley Cemented Stem Charnley Cemented Cup       | 1,058 | 1.60 | 0.77  | [-0.04 , 1.58] | Non-inferiority not shown | 0.063  |
| 7  | [MoP] Charnley Cemented Stem Charnley Ogee               | 2,239 | 1.38 | 0.55  | [-0.03 , 1.13] | Non-inferiority not shown | 0.064  |
| 8  | [MoP] Charnley Cemented Stem Charnley and Elite Plus LPW | 1,040 | 0.88 | 0.05  | [-0.59 , 0.69] | Non-inferiority not shown | 0.886  |
| 9  | [MoP] Charnley Cemented Stem Opera                       | 280   | 1.36 | 0.53  | [-0.84 , 1.90] | Non-inferiority not shown | 0.446  |
| 10 | [MoP] Corail Duraloc Cementless Cup                      | 978   | 1.96 | 1.13  | [ 0.21 , 2.05] | Inferior by $\geq 20\%$   | 0.016  |
| 11 | [MoP] Corail Elite Plus Ogee                             | 308   | 1.86 | 1.03  | [-0.38 , 2.44] | Non-inferiority not shown | 0.153  |
| 12 | [MoP] Corail Marathon                                    | 645   | 1.37 | 0.54  | [-0.27 , 1.35] | Non-inferiority not shown | 0.188  |
| 13 | [MoP] Corail Pinnacle                                    | 7,845 | 1.52 | 0.69  | [ 0.28 , 1.11] | Inferior by $\geq 20\%$   | 0.001  |
| 14 | [MoP] Corail Trilogy                                     | 517   | 1.76 | 0.93  | [-0.20 , 2.07] | Non-inferiority not shown | 0.108  |
| 15 | [MoP] Exeter V40 Cenator Cemented Cup                    | 395   | 1.46 | 0.63  | [-0.58 , 1.84] | Non-inferiority not shown | 0.307  |
| 16 | [MoP] Exeter V40 Charnley and Elite Plus LPW             | 397   | 1.70 | 0.87  | [-0.35 , 2.09] | Non-inferiority not shown | 0.164  |
| 17 | [MoP] Exeter V40 Duraloc Cementless Cup                  | 265   | 2.54 | 1.71  | [-0.18 , 3.60] | Non-inferiority not shown | 0.076  |
| 18 | [MoP] Exeter V40 Elite Plus Cemented Cup                 | 749   | 0.95 | 0.12  | [-0.62 , 0.86] | Non-inferiority not shown | 0.748  |
| 19 | [MoP] Exeter V40 Elite Plus Ogee                         | 3,262 | 1.05 | 0.22  | [-0.26 , 0.69] | Non-inferiority not shown | 0.369  |
| 20 | [MoP] Exeter V40 Exeter Contemporary Flanged             | 8,180 | 1.18 | 0.35  | [-0.05 , 0.75] | Non-inferiority not shown | 0.090  |
| 21 | [MoP] Exeter V40 Exeter Contemporary Hooded              | 2,960 | 1.74 | 0.91  | [ 0.36 , 1.45] | Inferior by $\geq 20\%$   | 0.001  |
| 22 | [MoP] Exeter V40 Exeter Duration                         | 2,482 | 1.53 | 0.70  | [ 0.13 , 1.27] | Non-inferiority not shown | 0.016  |
| 23 | [MoP] Exeter V40 Exeter X3 Rimfit                        | 1,213 | 1.48 | 0.65  | [ 0.03 , 1.28] | Non-inferiority not shown | 0.039  |
| 24 | [MoP] Exeter V40 Marathon                                | 261   | 0.86 | 0.03  | [-0.80 , 0.85] | Non-inferiority not shown | 0.946  |
| 25 | [MoP] Exeter V40 Opera                                   | 414   | 0.71 | -0.12 | [-0.99 , 0.75] | Non-inferiority not shown | 0.785  |
| 26 | [MoP] Exeter V40 Pinnacle                                | 462   | 1.75 | 0.92  | [-0.12 , 1.97] | Non-inferiority not shown | 0.084  |
| 27 | [MoP] Exeter V40 Reflection Cementless                   | 467   | 1.44 | 0.61  | [-0.50 , 1.72] | Non-inferiority not shown | 0.284  |
| 28 | [MoP] Exeter V40 Trident                                 | 4,119 | 1.23 | 0.40  | [-0.04 , 0.85] | Non-inferiority not shown | 0.074  |
| 29 | [MoP] Exeter V40 Trilogy                                 | 2,325 | 1.03 | 0.20  | [-0.32 , 0.71] | Non-inferiority not shown | 0.455  |
| 30 | [MoP] Furlong Cemented Stem JRI Cemented Cup             | 250   | 1.52 | 0.69  | [-0.83 , 2.21] | Non-inferiority not shown | 0.371  |
| 31 | [MoP] Furlong HAC Stem CSF                               | 1,718 | 1.67 | 0.84  | [ 0.17 , 1.51] | Inferior by $\geq 20\%$   | 0.014  |
| 32 | [MoP] Furlong HAC Stem Furlong HAC CSF Plus              | 689   | 2.04 | 1.21  | [ 0.27 , 2.14] | Inferior by $\geq 20\%$   | 0.011  |
| 33 | [MoP] M/L Taper Cementless Allofit                       | 280   | 1.41 | 0.58  | [-0.69 , 1.85] | Non-inferiority not shown | 0.373  |
| 34 | [MoP] Muller-Biomet Apollo                               | 460   | 1.24 | 0.41  | [-0.63 , 1.46] | Non-inferiority not shown | 0.438  |
| 35 | [MoP] Polarstem Cementless R3 Cementless                 | 330   | 1.22 | 0.39  | [-0.35 , 1.13] | Non-inferiority not shown | 0.302  |
| 36 | [MoP] SL-Plus Cementless Stem EP-Fit Plus                | 642   | 3.41 | 2.58  | [ 1.24 , 3.91] | Inferior by $\geq 100\%$  | <0.001 |
| 37 | [MoP] Stanmore Modular Stem Stanmore-Arcom Cup           | 546   | 0.90 | 0.07  | [-0.72 , 0.87] | Non-inferiority not shown | 0.856  |
| 38 | [MoP] Synergy Cementless Stem R3 Cementless              | 318   | 1.21 | 0.38  | [-0.54 , 1.29] | Non-inferiority not shown | 0.416  |
| 39 | [MoP] Synergy Cementless Stem Reflection Cementless      | 439   | 1.54 | 0.71  | [-0.47 , 1.89] | Non-inferiority not shown | 0.239  |
| 40 | [MoP] Taperloc Cementless Stem Exceed ABT                | 971   | 1.32 | 0.49  | [-0.18 , 1.17] | Non-inferiority not shown | 0.154  |
| 41 | [MoP] Versys Cementless Stem Trilogy                     | 282   | 3.38 | 2.55  | [ 0.46 , 4.64] | Inferior by $\geq 20\%$   | 0.017  |

**Supplemental table 8b: Difference in Kaplan-Meier failure estimate between a contemporary reference and implants with at least 250 at risk at 5 years since primary in males between 55 and 75 years**

| Stem/cup brand                                                | Number at risk | Cumulative failure (%) | Difference in failure (%) | 95% CI          | Equivalence status        | p-value |
|---------------------------------------------------------------|----------------|------------------------|---------------------------|-----------------|---------------------------|---------|
| [CoP] Furlong HAC Stem CSF                                    | 1,759          | 1.09                   | [REFERENCE]               |                 |                           |         |
| [CoC] ABG II Monolithic Cementless Stem ABG II Cementless Cup | 392            | 2.82                   | 1.73                      | [ 0.09 , 3.37]  | Non-inferiority not shown | 0.038   |
| [CoC] ABG II Monolithic Cementless Stem Trident               | 306            | 3.89                   | 2.80                      | [ 0.74 , 4.85]  | Inferior by $\geq 20\%$   | 0.008   |
| [CoC] Accolade Trident                                        | 1,624          | 2.87                   | 1.77                      | [ 0.94 , 2.60]  | Inferior by $\geq 20\%$   | <0.001  |
| [CoC] Corail Duraloc Option                                   | 303            | 2.50                   | 1.41                      | [-0.36 , 3.18]  | Non-inferiority not shown | 0.119   |
| [CoC] Corail Pinnacle                                         | 5,229          | 2.37                   | 1.28                      | [ 0.74 , 1.82]  | Inferior by $\geq 20\%$   | <0.001  |
| [CoC] Exeter V40 ABG II Cementless Cup                        | 269            | 1.15                   | 0.06                      | [-1.16 , 1.28]  | Non-inferiority not shown | 0.924   |
| [CoC] Exeter V40 Trident                                      | 2,279          | 1.74                   | 0.65                      | [ 0.00 , 1.29]  | Non-inferiority not shown | 0.049   |
| [CoC] Furlong HAC Stem CSF                                    | 438            | 3.80                   | 2.70                      | [ 0.93 , 4.48]  | Inferior by $\geq 20\%$   | 0.003   |
| [CoC] Furlong HAC Stem Furlong HAC CSF Plus                   | 1,705          | 1.86                   | 0.76                      | [ 0.13 , 1.40]  | Non-inferiority not shown | 0.018   |
| [CoC] SL-Plus Cementless Stem EP-Fit Plus                     | 367            | 5.89                   | 4.79                      | [ 2.51 , 7.08]  | Inferior by $\geq 100\%$  | <0.001  |
| [CoC] Taperloc Cementless Stem Exceed ABT                     | 1,161          | 1.61                   | 0.52                      | [-0.15 , 1.18]  | Non-inferiority not shown | 0.127   |
| [CoP] Accolade Trident                                        | 422            | 1.94                   | 0.85                      | [-0.03 , 1.72]  | Non-inferiority not shown | 0.057   |
| [CoP] Corail Pinnacle                                         | 1,340          | 1.58                   | 0.48                      | [-0.14 , 1.11]  | Non-inferiority not shown | 0.131   |
| [CoP] Exeter V40 Elite Plus Ogee                              | 294            | 0.88                   | -0.21                     | [-1.21 , 0.79]  | Non-inferiority not shown | 0.680   |
| [CoP] Exeter V40 Exeter Contemporary Flanged                  | 635            | 0.88                   | -0.21                     | [-0.90 , 0.48]  | Non-inferiority not shown | 0.548   |
| [CoP] Exeter V40 Trident                                      | 670            | 0.97                   | -0.12                     | [-0.75 , 0.51]  | Non-inferiority not shown | 0.701   |
| [CoP] Exeter V40 Trilogy                                      | 492            | 1.71                   | 0.62                      | [-0.48 , 1.72]  | Non-inferiority not shown | 0.272   |
| [CoP] Furlong HAC Stem Furlong HAC CSF Plus                   | 327            | 1.60                   | 0.51                      | [-0.48 , 1.50]  | Non-inferiority not shown | 0.313   |
| [CoP] MS-30 Original ME Muller Low Profile Cup                | 267            | 0.21                   | -0.88                     | [-1.49 , -0.27] | Non-inferior              | 0.005   |
| [MoP] Accolade Trident                                        | 1,703          | 3.33                   | 2.24                      | [ 1.42 , 3.05]  | Inferior by $\geq 100\%$  | <0.001  |
| [MoP] C-Stem AMT Cemented Stem Charnley and Elite Plus LPW    | 283            | 1.68                   | 0.58                      | [-0.65 , 1.82]  | Non-inferiority not shown | 0.355   |
| [MoP] C-Stem Cemented Stem Charnley and Elite Plus LPW        | 296            | 1.16                   | 0.07                      | [-1.15 , 1.29]  | Non-inferiority not shown | 0.911   |
| [MoP] C-Stem Cemented Stem Elite Plus Ogee                    | 639            | 1.26                   | 0.17                      | [-0.67 , 1.01]  | Non-inferiority not shown | 0.696   |
| [MoP] C-Stem Cemented Stem Opera                              | 288            | 2.29                   | 1.20                      | [-0.35 , 2.75]  | Non-inferiority not shown | 0.129   |
| [MoP] CPT Elite Plus Ogee                                     | 426            | 2.12                   | 1.02                      | [-0.25 , 2.30]  | Non-inferiority not shown | 0.116   |
| [MoP] CPT Trilogy                                             | 1,247          | 2.23                   | 1.14                      | [ 0.35 , 1.92]  | Inferior by $\geq 20\%$   | 0.005   |
| [MoP] CPT ZCA                                                 | 825            | 1.91                   | 0.81                      | [-0.09 , 1.71]  | Non-inferiority not shown | 0.076   |
| [MoP] Charnley Cemented Stem Charnley Cemented Cup            | 942            | 2.86                   | 1.76                      | [ 0.67 , 2.85]  | Inferior by $\geq 20\%$   | 0.002   |
| [MoP] Charnley Cemented Stem Charnley Ogee                    | 1,978          | 2.45                   | 1.35                      | [ 0.58 , 2.13]  | Inferior by $\geq 20\%$   | 0.001   |
| [MoP] Charnley Cemented Stem Charnley and Elite Plus LPW      | 929            | 1.28                   | 0.19                      | [-0.62 , 0.99]  | Non-inferiority not shown | 0.650   |
| [MoP] Corail Duraloc Cementless Cup                           | 923            | 2.79                   | 1.69                      | [ 0.58 , 2.80]  | Inferior by $\geq 20\%$   | 0.003   |
| [MoP] Corail Marathon                                         | 326            | 1.77                   | 0.67                      | [-0.34 , 1.69]  | Non-inferiority not shown | 0.193   |
| [MoP] Corail Pinnacle                                         | 4,602          | 1.85                   | 0.76                      | [ 0.24 , 1.28]  | Inferior by $\geq 20\%$   | 0.004   |
| [MoP] Corail Trilogy                                          | 393            | 2.43                   | 1.34                      | [-0.05 , 2.72]  | Non-inferiority not shown | 0.059   |
| [MoP] Exeter V40 Cenator Cemented Cup                         | 337            | 1.97                   | 0.87                      | [-0.55 , 2.30]  | Non-inferiority not shown | 0.229   |
| [MoP] Exeter V40 Charnley and Elite Plus LPW                  | 317            | 1.70                   | 0.60                      | [-0.65 , 1.86]  | Non-inferiority not shown | 0.347   |
| [MoP] Exeter V40 Duraloc Cementless Cup                       | 252            | 2.92                   | 1.83                      | [-0.22 , 3.87]  | Non-inferiority not shown | 0.080   |
| [MoP] Exeter V40 Elite Plus Cemented Cup                      | 583            | 1.39                   | 0.30                      | [-0.64 , 1.23]  | Non-inferiority not shown | 0.533   |

|    |                                                     |       |      |      |                |                           |        |
|----|-----------------------------------------------------|-------|------|------|----------------|---------------------------|--------|
| 1  | [MoP] Exeter V40 Elite Plus Ogee                    | 2,569 | 1.35 | 0.26 | [-0.33 , 0.85] | Non-inferiority not shown | 0.390  |
| 2  | [MoP] Exeter V40 Exeter Contemporary Flanged        | 5,599 | 1.66 | 0.56 | [ 0.04 , 1.08] | Non-inferiority not shown | 0.033  |
| 3  | [MoP] Exeter V40 Exeter Contemporary Hooded         | 2,246 | 2.26 | 1.17 | [ 0.50 , 1.84] | Inferior by $\geq 20\%$   | 0.001  |
| 4  | [MoP] Exeter V40 Exeter Duration                    | 1,970 | 2.29 | 1.20 | [ 0.47 , 1.92] | Inferior by $\geq 20\%$   | 0.001  |
| 5  | [MoP] Exeter V40 Opera                              | 298   | 1.53 | 0.43 | [-0.86 , 1.73] | Non-inferiority not shown | 0.512  |
| 6  | [MoP] Exeter V40 Pinnacle                           | 305   | 2.50 | 1.40 | [ 0.04 , 2.77] | Non-inferiority not shown | 0.044  |
| 7  | [MoP] Exeter V40 Reflection Cementless              | 426   | 2.31 | 1.22 | [-0.21 , 2.64] | Non-inferiority not shown | 0.094  |
| 8  | [MoP] Exeter V40 Trident                            | 2,530 | 1.68 | 0.59 | [ 0.02 , 1.16] | Non-inferiority not shown | 0.044  |
| 9  | [MoP] Exeter V40 Trilogy                            | 1,851 | 1.21 | 0.12 | [-0.50 , 0.74] | Non-inferiority not shown | 0.703  |
| 10 | [MoP] Furlong HAC Stem CSF                          | 1,448 | 1.97 | 0.88 | [ 0.11 , 1.65] | Non-inferiority not shown | 0.026  |
| 11 | [MoP] Furlong HAC Stem Furlong HAC CSF Plus         | 430   | 3.06 | 1.97 | [ 0.70 , 3.23] | Inferior by $\geq 20\%$   | 0.002  |
| 12 | [MoP] Muller-Biomet Apollo                          | 375   | 1.47 | 0.37 | [-0.80 , 1.54] | Non-inferiority not shown | 0.531  |
| 13 | [MoP] SL-Plus Cementless Stem EP-Fit Plus           | 554   | 4.71 | 3.62 | [ 2.00 , 5.24] | Inferior by $\geq 100\%$  | <0.001 |
| 14 | [MoP] Stanmore Modular Stem Stanmore-Arcom Cup      | 434   | 1.51 | 0.41 | [-0.67 , 1.50] | Non-inferiority not shown | 0.455  |
| 15 | [MoP] Synergy Cementless Stem Reflection Cementless | 407   | 2.46 | 1.37 | [-0.14 , 2.87] | Non-inferiority not shown | 0.075  |
| 16 | [MoP] Taperloc Cementless Stem Exceed ABT           | 448   | 1.64 | 0.55 | [-0.32 , 1.41] | Non-inferiority not shown | 0.214  |
| 17 | [MoP] Versys Cementless Stem Trilogy                | 261   | 3.73 | 2.64 | [ 0.43 , 4.85] | Inferior by $\geq 20\%$   | 0.019  |

**Supplemental table 8c: Difference in Kaplan-Meier failure estimate between a contemporary reference and implants with at least 250 at risk at 7 years since primary in males between 55 and 75 years**

| Stem/cup brand                                                | Number at risk | Cumulative failure (%) | Difference in failure (%) | 95% CI         | Equivalence status        | p-value |
|---------------------------------------------------------------|----------------|------------------------|---------------------------|----------------|---------------------------|---------|
| [CoP] Furlong HAC Stem CSF                                    | 1,463          | 1.34                   | [REFERENCE]               |                |                           |         |
| [CoC] ABG II Monolithic Cementless Stem ABG II Cementless Cup | 345            | 3.88                   | 2.53                      | [ 0.60 , 4.47] | Inferior by $\geq 20\%$   | 0.010   |
| [CoC] Accolade Trident                                        | 907            | 3.15                   | 1.81                      | [ 0.90 , 2.71] | Inferior by $\geq 20\%$   | <0.001  |
| [CoC] Corail Pinnacle                                         | 2,130          | 2.66                   | 1.32                      | [ 0.70 , 1.94] | Inferior by $\geq 20\%$   | <0.001  |
| [CoC] Exeter V40 Trident                                      | 1,626          | 2.00                   | 0.66                      | [-0.06 , 1.38] | Non-inferiority not shown | 0.074   |
| [CoC] Furlong HAC Stem CSF                                    | 415            | 4.02                   | 2.68                      | [ 0.84 , 4.53] | Inferior by $\geq 20\%$   | 0.004   |
| [CoC] Furlong HAC Stem Furlong HAC CSF Plus                   | 674            | 2.13                   | 0.79                      | [ 0.06 , 1.51] | Non-inferiority not shown | 0.034   |
| [CoC] SL-Plus Cementless Stem EP-Fit Plus                     | 322            | 6.44                   | 5.09                      | [ 2.69 , 7.50] | Inferior by $\geq 100\%$  | <0.001  |
| [CoC] Taperloc Cementless Stem Exceed ABT                     | 469            | 1.99                   | 0.65                      | [-0.20 , 1.49] | Non-inferiority not shown | 0.132   |
| [CoP] Corail Pinnacle                                         | 480            | 2.24                   | 0.90                      | [-0.00 , 1.80] | Non-inferiority not shown | 0.051   |
| [CoP] Exeter V40 Exeter Contemporary Flanged                  | 335            | 0.88                   | -0.46                     | [-1.19 , 0.27] | Non-inferiority not shown | 0.218   |
| [CoP] Exeter V40 Trident                                      | 362            | 1.17                   | -0.17                     | [-0.95 , 0.61] | Non-inferiority not shown | 0.668   |
| [CoP] Exeter V40 Trilogy                                      | 350            | 1.92                   | 0.57                      | [-0.62 , 1.77] | Non-inferiority not shown | 0.347   |
| [MoP] Accolade Trident                                        | 787            | 3.94                   | 2.60                      | [ 1.64 , 3.55] | Inferior by $\geq 100\%$  | <0.001  |
| [MoP] C-Stem Cemented Stem Charnley and Elite Plus LPW        | 272            | 1.16                   | -0.18                     | [-1.42 , 1.07] | Non-inferiority not shown | 0.779   |
| [MoP] C-Stem Cemented Stem Elite Plus Ogee                    | 494            | 1.45                   | 0.11                      | [-0.84 , 1.06] | Non-inferiority not shown | 0.818   |
| [MoP] CPT Elite Plus Ogee                                     | 325            | 2.35                   | 1.01                      | [-0.37 , 2.38] | Non-inferiority not shown | 0.151   |
| [MoP] CPT Trilogy                                             | 815            | 2.41                   | 1.06                      | [ 0.21 , 1.92] | Non-inferiority not shown | 0.015   |
| [MoP] CPT ZCA                                                 | 599            | 2.69                   | 1.35                      | [ 0.23 , 2.46] | Non-inferiority not shown | 0.018   |
| [MoP] Charnley Cemented Stem Charnley Cemented Cup            | 813            | 3.75                   | 2.41                      | [ 1.14 , 3.68] | Inferior by $\geq 20\%$   | <0.001  |
| [MoP] Charnley Cemented Stem Charnley Ogee                    | 1,632          | 3.68                   | 2.34                      | [ 1.39 , 3.29] | Inferior by $\geq 100\%$  | <0.001  |
| [MoP] Charnley Cemented Stem Charnley and Elite Plus LPW      | 776            | 1.98                   | 0.64                      | [-0.37 , 1.64] | Non-inferiority not shown | 0.212   |
| [MoP] Corail Duraloc Cementless Cup                           | 750            | 3.84                   | 2.50                      | [ 1.18 , 3.82] | Inferior by $\geq 20\%$   | <0.001  |
| [MoP] Corail Pinnacle                                         | 2,172          | 2.41                   | 1.07                      | [ 0.44 , 1.70] | Inferior by $\geq 20\%$   | 0.001   |
| [MoP] Corail Trilogy                                          | 254            | 3.58                   | 2.24                      | [ 0.45 , 4.03] | Inferior by $\geq 20\%$   | 0.014   |
| [MoP] Exeter V40 Cenator Cemented Cup                         | 263            | 2.66                   | 1.32                      | [-0.40 , 3.04] | Non-inferiority not shown | 0.134   |
| [MoP] Exeter V40 Elite Plus Cemented Cup                      | 400            | 1.39                   | 0.05                      | [-0.92 , 1.02] | Non-inferiority not shown | 0.920   |
| [MoP] Exeter V40 Elite Plus Ogee                              | 1,861          | 1.79                   | 0.45                      | [-0.24 , 1.14] | Non-inferiority not shown | 0.203   |
| [MoP] Exeter V40 Exeter Contemporary Flanged                  | 3,658          | 2.15                   | 0.81                      | [ 0.21 , 1.42] | Non-inferiority not shown | 0.008   |
| [MoP] Exeter V40 Exeter Contemporary Hooded                   | 1,560          | 2.93                   | 1.58                      | [ 0.78 , 2.38] | Inferior by $\geq 20\%$   | <0.001  |
| [MoP] Exeter V40 Exeter Duration                              | 1,396          | 3.26                   | 1.92                      | [ 1.02 , 2.82] | Inferior by $\geq 20\%$   | <0.001  |
| [MoP] Exeter V40 Reflection Cementless                        | 339            | 2.55                   | 1.21                      | [-0.31 , 2.73] | Non-inferiority not shown | 0.117   |
| [MoP] Exeter V40 Trident                                      | 1,455          | 1.83                   | 0.48                      | [-0.16 , 1.12] | Non-inferiority not shown | 0.140   |
| [MoP] Exeter V40 Trilogy                                      | 1,299          | 1.71                   | 0.37                      | [-0.38 , 1.12] | Non-inferiority not shown | 0.332   |
| [MoP] Furlong HAC Stem CSF                                    | 1,139          | 2.72                   | 1.37                      | [ 0.45 , 2.30] | Inferior by $\geq 20\%$   | 0.004   |
| [MoP] Muller-Biomet Apollo                                    | 277            | 1.47                   | 0.13                      | [-1.07 , 1.32] | Non-inferiority not shown | 0.835   |
| [MoP] SL-Plus Cementless Stem EP-Fit Plus                     | 411            | 6.01                   | 4.67                      | [ 2.79 , 6.55] | Inferior by $\geq 100\%$  | <0.001  |
| [MoP] Stanmore Modular Stem Stanmore-Arcom Cup                | 312            | 2.00                   | 0.66                      | [-0.64 , 1.96] | Non-inferiority not shown | 0.320   |
| [MoP] Synergy Cementless Stem Reflection Cementless           | 298            | 2.71                   | 1.37                      | [-0.23 , 2.96] | Non-inferiority not shown | 0.093   |

1  
2  
3  
4  
5  
6  
7  
8  
9  
10  
11  
12  
13  
14  
15  
16  
17  
18  
19  
20  
21  
22  
23  
24  
25  
26  
27  
28  
29  
30  
31  
32  
33  
34  
35  
36  
37  
38  
39  
40  
41  
42  
43  
44  
45  
46

For peer review only

**Supplemental table 8d: Difference in Kaplan-Meier failure estimate between a contemporary reference and implants with at least 250 at risk at 10 years since primary in males between 55 and 75 years**

| Stem/cup brand                                                | Number at risk | Cumulative failure (%) | Difference in failure (%) | 95% CI          | Equivalence status        | p-value |
|---------------------------------------------------------------|----------------|------------------------|---------------------------|-----------------|---------------------------|---------|
| [MoP] Exeter V40 Exeter Contemporary Flanged                  | 1,182          | 3.08                   | [REFERENCE]               |                 |                           |         |
| [CoC] ABG II Monolithic Cementless Stem ABG II Cementless Cup | 257            | 5.45                   | 2.38                      | [ 0.02 , 4.73]  | Non-inferiority not shown | 0.048   |
| [CoC] Exeter V40 Trident                                      | 545            | 2.49                   | -0.59                     | [-1.46 , 0.27]  | Non-inferior              | 0.179   |
| [CoP] Furlong HAC Stem CSF                                    | 855            | 1.75                   | -1.32                     | [-2.14 , -0.51] | Non-inferior              | 0.001   |
| [MoP] C-Stem Cemented Stem Elite Plus Ogee                    | 254            | 2.48                   | -0.60                     | [-2.00 , 0.80]  | Non-inferiority not shown | 0.400   |
| [MoP] CPT Trilogy                                             | 302            | 3.83                   | 0.75                      | [-0.59 , 2.10]  | Non-inferiority not shown | 0.272   |
| [MoP] Charnley Cemented Stem Charnley Cemented Cup            | 486            | 5.76                   | 2.68                      | [ 1.04 , 4.31]  | Inferior by $\geq 20\%$   | 0.001   |
| [MoP] Charnley Cemented Stem Charnley Ogee                    | 910            | 5.47                   | 2.39                      | [ 1.21 , 3.58]  | Inferior by $\geq 20\%$   | <0.001  |
| [MoP] Charnley Cemented Stem Charnley and Elite Plus LPW      | 500            | 3.21                   | 0.13                      | [-1.19 , 1.45]  | Non-inferiority not shown | 0.846   |
| [MoP] Corail Duraloc Cementless Cup                           | 336            | 7.31                   | 4.23                      | [ 2.19 , 6.27]  | Inferior by $\geq 20\%$   | <0.001  |
| [MoP] Corail Pinnacle                                         | 545            | 3.39                   | 0.31                      | [-0.53 , 1.15]  | Non-inferiority not shown | 0.468   |
| [MoP] Exeter V40 Elite Plus Ogee                              | 805            | 2.81                   | -0.27                     | [-1.18 , 0.65]  | Non-inferiority not shown | 0.568   |
| [MoP] Exeter V40 Exeter Contemporary Hooded                   | 600            | 4.02                   | 0.94                      | [-0.09 , 1.98]  | Non-inferiority not shown | 0.074   |
| [MoP] Exeter V40 Exeter Duration                              | 642            | 5.21                   | 2.14                      | [ 0.92 , 3.35]  | Inferior by $\geq 20\%$   | 0.001   |
| [MoP] Exeter V40 Trident                                      | 335            | 2.78                   | -0.30                     | [-1.32 , 0.72]  | Non-inferiority not shown | 0.566   |
| [MoP] Exeter V40 Trilogy                                      | 482            | 3.05                   | -0.03                     | [-1.09 , 1.03]  | Non-inferiority not shown | 0.956   |
| [MoP] Furlong HAC Stem CSF                                    | 483            | 4.63                   | 1.55                      | [ 0.22 , 2.89]  | Non-inferiority not shown | 0.023   |

**Supplemental table 9a: Difference in Kaplan-Meier failure estimate between a contemporary reference and implants with at least 250 at risk at 3 years since primary in males >75 years**

| Stem/cup brand                                             | Number at risk | Cumulative failure (%) | Difference in failure (%) | 95% CI         | Equivalence status        | p-value |
|------------------------------------------------------------|----------------|------------------------|---------------------------|----------------|---------------------------|---------|
| [MoP] Exeter V40 Elite Plus Ogee                           | 2,199          | 0.78                   | [REFERENCE]               |                |                           |         |
| [CoC] Corail Pinnacle                                      | 540            | 2.35                   | 1.57                      | [ 0.38 , 2.76] | Inferior by $\geq 20\%$   | 0.010   |
| [CoC] Furlong HAC Stem Furlong HAC CSF Plus                | 350            | 2.46                   | 1.68                      | [ 0.26 , 3.10] | Inferior by $\geq 20\%$   | 0.020   |
| [CoP] Corail Pinnacle                                      | 306            | 1.43                   | 0.65                      | [-0.25 , 1.56] | Non-inferiority not shown | 0.159   |
| [CoP] Furlong HAC Stem CSF                                 | 326            | 1.19                   | 0.41                      | [-0.68 , 1.51] | Non-inferiority not shown | 0.456   |
| [MoP] Accolade Trident                                     | 911            | 2.78                   | 2.00                      | [ 1.01 , 3.00] | Inferior by $\geq 100\%$  | <0.001  |
| [MoP] C-Stem AMT Cemented Stem Charnley and Elite Plus LPW | 293            | 1.38                   | 0.60                      | [-0.65 , 1.85] | Non-inferiority not shown | 0.347   |
| [MoP] C-Stem AMT Cemented Stem Elite Plus Ogee             | 265            | 0.56                   | -0.22                     | [-1.07 , 0.63] | Non-inferiority not shown | 0.618   |
| [MoP] C-Stem Cemented Stem Elite Plus Ogee                 | 365            | 1.07                   | 0.29                      | [-0.70 , 1.28] | Non-inferiority not shown | 0.563   |
| [MoP] CPT Elite Plus Ogee                                  | 287            | 2.08                   | 1.30                      | [-0.26 , 2.87] | Non-inferiority not shown | 0.103   |
| [MoP] CPT Trilogy                                          | 894            | 1.93                   | 1.15                      | [ 0.34 , 1.97] | Inferior by $\geq 20\%$   | 0.005   |
| [MoP] CPT ZCA                                              | 1,080          | 1.70                   | 0.93                      | [ 0.22 , 1.63] | Inferior by $\geq 20\%$   | 0.010   |
| [MoP] Charnley Cemented Stem Charnley Cemented Cup         | 398            | 0.92                   | 0.14                      | [-0.82 , 1.10] | Non-inferiority not shown | 0.771   |
| [MoP] Charnley Cemented Stem Charnley Ogee                 | 959            | 1.32                   | 0.54                      | [-0.20 , 1.28] | Non-inferiority not shown | 0.154   |
| [MoP] Charnley Cemented Stem Charnley and Elite Plus LPW   | 559            | 1.07                   | 0.29                      | [-0.56 , 1.14] | Non-inferiority not shown | 0.507   |
| [MoP] Corail Duraloc Cementless Cup                        | 280            | 0.64                   | -0.14                     | [-1.08 , 0.81] | Non-inferiority not shown | 0.780   |
| [MoP] Corail Marathon                                      | 317            | 1.78                   | 1.00                      | [-0.14 , 2.14] | Non-inferiority not shown | 0.084   |
| [MoP] Corail Pinnacle                                      | 2,860          | 1.59                   | 0.81                      | [ 0.33 , 1.30] | Inferior by $\geq 20\%$   | 0.001   |
| [MoP] Exeter V40 Cenator Cemented Cup                      | 301            | 1.13                   | 0.35                      | [-0.80 , 1.51] | Non-inferiority not shown | 0.547   |
| [MoP] Exeter V40 Charnley and Elite Plus LPW               | 263            | 0.27                   | -0.51                     | [-1.13 , 0.12] | Non-inferior              | 0.113   |
| [MoP] Exeter V40 Elite Plus Cemented Cup                   | 394            | 0.78                   | 0.00                      | [-0.83 , 0.84] | Non-inferiority not shown | 0.994   |
| [MoP] Exeter V40 Exeter Contemporary Flanged               | 5,295          | 1.03                   | 0.25                      | [-0.15 , 0.65] | Non-inferiority not shown | 0.221   |
| [MoP] Exeter V40 Exeter Contemporary Hooded                | 2,098          | 1.84                   | 1.06                      | [ 0.48 , 1.64] | Inferior by $\geq 20\%$   | <0.001  |
| [MoP] Exeter V40 Exeter Duration                           | 1,426          | 1.51                   | 0.73                      | [ 0.08 , 1.39] | Non-inferiority not shown | 0.028   |
| [MoP] Exeter V40 Exeter X3 Rimfit                          | 537            | 1.21                   | 0.43                      | [-0.28 , 1.13] | Non-inferiority not shown | 0.237   |
| [MoP] Exeter V40 Opera                                     | 290            | 1.47                   | 0.69                      | [-0.63 , 2.01] | Non-inferiority not shown | 0.306   |
| [MoP] Exeter V40 Pinnacle                                  | 288            | 1.15                   | 0.37                      | [-0.62 , 1.36] | Non-inferiority not shown | 0.460   |
| [MoP] Exeter V40 Reflection Cementless                     | 256            | 2.46                   | 1.68                      | [-0.15 , 3.51] | Non-inferiority not shown | 0.072   |
| [MoP] Exeter V40 Trident                                   | 2,148          | 1.41                   | 0.63                      | [ 0.11 , 1.15] | Non-inferiority not shown | 0.018   |
| [MoP] Exeter V40 Trilogy                                   | 867            | 1.15                   | 0.37                      | [-0.36 , 1.10] | Non-inferiority not shown | 0.319   |
| [MoP] Furlong HAC Stem CSF                                 | 770            | 1.99                   | 1.21                      | [ 0.27 , 2.16] | Inferior by $\geq 20\%$   | 0.012   |
| [MoP] Furlong HAC Stem Furlong HAC CSF Plus                | 449            | 3.06                   | 2.28                      | [ 1.00 , 3.56] | Inferior by $\geq 100\%$  | <0.001  |
| [MoP] Muller-Biomet Apollo                                 | 276            | 0.96                   | 0.18                      | [-0.95 , 1.31] | Non-inferiority not shown | 0.755   |
| [MoP] Stanmore Modular Stem Stanmore-Arcom Cup             | 510            | 1.01                   | 0.23                      | [-0.64 , 1.09] | Non-inferiority not shown | 0.610   |
| [MoP] Taperloc Cementless Stem Exceed ABT                  | 421            | 1.75                   | 0.97                      | [ 0.01 , 1.94] | Non-inferiority not shown | 0.049   |



**Supplemental table 9b: Difference in Kaplan-Meier failure estimate between a contemporary reference and implants with at least 250 at risk at 5 years since primary in males >75 years**

| Stem/cup brand                                           | Number at risk | Cumulative failure (%) | Difference in failure (%) | 95% CI         | Equivalence status        | p-value |
|----------------------------------------------------------|----------------|------------------------|---------------------------|----------------|---------------------------|---------|
| [MoP] Exeter V40 Elite Plus Ogee                         | 1,490          | 1.10                   | [REFERENCE]               |                |                           |         |
| [CoC] Corail Pinnacle                                    | 321            | 2.82                   | 1.73                      | [ 0.35 , 3.11] | Inferior by $\geq 20\%$   | 0.014   |
| [MoP] Accolade Trident                                   | 540            | 3.41                   | 2.32                      | [ 1.12 , 3.51] | Inferior by $\geq 100\%$  | <0.001  |
| [MoP] C-Stem Cemented Stem Elite Plus Ogee               | 253            | 1.45                   | 0.36                      | [-0.91 , 1.62] | Non-inferiority not shown | 0.579   |
| [MoP] CPT Trilogy                                        | 535            | 2.58                   | 1.48                      | [ 0.46 , 2.50] | Inferior by $\geq 20\%$   | 0.004   |
| [MoP] CPT ZCA                                            | 693            | 2.90                   | 1.80                      | [ 0.78 , 2.83] | Inferior by $\geq 20\%$   | 0.001   |
| [MoP] Charnley Cemented Stem Charnley Cemented Cup       | 325            | 0.92                   | -0.17                     | [-1.16 , 0.82] | Non-inferiority not shown | 0.731   |
| [MoP] Charnley Cemented Stem Charnley Ogee               | 760            | 1.91                   | 0.81                      | [-0.12 , 1.75] | Non-inferiority not shown | 0.088   |
| [MoP] Charnley Cemented Stem Charnley and Elite Plus LPW | 446            | 1.43                   | 0.33                      | [-0.68 , 1.35] | Non-inferiority not shown | 0.521   |
| [MoP] Corail Pinnacle                                    | 1,479          | 1.98                   | 0.88                      | [ 0.27 , 1.49] | Inferior by $\geq 20\%$   | 0.005   |
| [MoP] Exeter V40 Elite Plus Cemented Cup                 | 271            | 1.04                   | -0.06                     | [-1.06 , 0.95] | Non-inferiority not shown | 0.910   |
| [MoP] Exeter V40 Exeter Contemporary Flanged             | 3,050          | 1.33                   | 0.24                      | [-0.26 , 0.74] | Non-inferiority not shown | 0.350   |
| [MoP] Exeter V40 Exeter Contemporary Hooded              | 1,283          | 2.09                   | 1.00                      | [ 0.32 , 1.68] | Inferior by $\geq 20\%$   | 0.004   |
| [MoP] Exeter V40 Exeter Duration                         | 1,041          | 2.08                   | 0.98                      | [ 0.17 , 1.80] | Non-inferiority not shown | 0.018   |
| [MoP] Exeter V40 Trident                                 | 1,100          | 1.57                   | 0.48                      | [-0.13 , 1.09] | Non-inferiority not shown | 0.125   |
| [MoP] Exeter V40 Trilogy                                 | 592            | 2.07                   | 0.97                      | [-0.05 , 1.99] | Non-inferiority not shown | 0.063   |
| [MoP] Furlong HAC Stem CSF                               | 561            | 2.27                   | 1.17                      | [ 0.12 , 2.22] | Non-inferiority not shown | 0.029   |
| [MoP] Stanmore Modular Stem Stanmore-Arcom Cup           | 358            | 1.20                   | 0.11                      | [-0.88 , 1.09] | Non-inferiority not shown | 0.834   |

**Supplemental table 9c: Difference in Kaplan-Meier failure estimate between a contemporary reference and implants with at least 250 at risk at 7 years since primary in males >75 years**

| Stem/cup brand                                           | Number at risk | Cumulative failure (%) | Difference in failure (%) | 95% CI         | Equivalence status        | p-value |
|----------------------------------------------------------|----------------|------------------------|---------------------------|----------------|---------------------------|---------|
| [MoP] Exeter V40 Exeter Contemporary Flanged             | 1,540          | 1.76                   | [REFERENCE]               |                |                           |         |
| [MoP] CPT Trilogy                                        | 264            | 3.16                   | 1.40                      | [ 0.20 , 2.60] | Non-inferiority not shown | 0.022   |
| [MoP] CPT ZCA                                            | 390            | 3.94                   | 2.18                      | [ 0.82 , 3.55] | Inferior by $\geq 20\%$   | 0.002   |
| [MoP] Charnley Cemented Stem Charnley Cemented Cup       | 252            | 1.25                   | -0.51                     | [-1.68 , 0.66] | Non-inferiority not shown | 0.393   |
| [MoP] Charnley Cemented Stem Charnley Ogee               | 502            | 2.56                   | 0.80                      | [-0.32 , 1.92] | Non-inferiority not shown | 0.162   |
| [MoP] Charnley Cemented Stem Charnley and Elite Plus LPW | 308            | 1.43                   | -0.33                     | [-1.34 , 0.68] | Non-inferiority not shown | 0.520   |
| [MoP] Corail Pinnacle                                    | 542            | 2.34                   | 0.58                      | [-0.14 , 1.30] | Non-inferiority not shown | 0.116   |
| [MoP] Exeter V40 Elite Plus Ogee                         | 868            | 1.43                   | -0.33                     | [-0.99 , 0.32] | Non-inferior              | 0.315   |
| [MoP] Exeter V40 Exeter Contemporary Hooded              | 670            | 2.53                   | 0.77                      | [-0.02 , 1.57] | Non-inferiority not shown | 0.056   |
| [MoP] Exeter V40 Exeter Duration                         | 643            | 3.08                   | 1.32                      | [ 0.29 , 2.36] | Non-inferiority not shown | 0.012   |
| [MoP] Exeter V40 Trident                                 | 538            | 2.35                   | 0.59                      | [-0.28 , 1.46] | Non-inferiority not shown | 0.185   |
| [MoP] Exeter V40 Trilogy                                 | 321            | 2.07                   | 0.31                      | [-0.71 , 1.32] | Non-inferiority not shown | 0.553   |
| [MoP] Furlong HAC Stem CSF                               | 358            | 3.06                   | 1.30                      | [ 0.01 , 2.60] | Non-inferiority not shown | 0.049   |

**Supplemental table 10a: Total number of implants at risk at each time-point by age-group and gender in implants with at least 500**

|               | Time since primary procedure |         |         |          |
|---------------|------------------------------|---------|---------|----------|
|               | 3 years                      | 5 years | 7 years | 10 years |
| Male, <55     | 7,977                        | 3,749   | No data | No data  |
| Male, 55-75   | 79,299                       | 49,540  | 27,512  | 6,584    |
| Male, 75+     | 23,653                       | 13,124  | 5,303   | No data  |
| Total Male    | 132,073                      | 82,003  | 42,294  | 10,348   |
| Female, <55   | 10,007                       | 6,016   | 2,303   | No data  |
| Female, 55-75 | 136,561                      | 91,874  | 52,940  | 15,848   |
| Female, 75+   | 64,959                       | 37,694  | 19,779  | No data  |
| Total Female  | 244,285                      | 156,505 | 91,701  | 24,408   |
| Total         | 415,608                      | 268,809 | 156,138 | 41,908   |

**Supplemental table 10b: Total number of implant failures at each time-point by age-group and gender in implants with at least 500 at risk**

|               | Time since primary procedure |         |         |          |
|---------------|------------------------------|---------|---------|----------|
|               | 3 years                      | 5 years | 7 years | 10 years |
| Male, <55     | 260                          | 132     | 68      | 53       |
| Male, 55-75   | 1,039                        | 533     | 364     | 442      |
| Male, 75+     | 293                          | 133     | 86      | 57       |
| Total Male    | 1,618                        | 811     | 529     | 560      |
| Female, <55   | 268                          | 141     | 102     | 79       |
| Female, 55-75 | 1,344                        | 784     | 539     | 545      |
| Female, 75+   | 458                          | 255     | 161     | 120      |
| Total Female  | 2,091                        | 1,189   | 820     | 754      |
| Total         | 3,733                        | 2,009   | 1,359   | 1,325    |

1  
2  
3  
4  
5  
6  
7  
8  
9  
10  
11  
12  
13  
14  
15  
16  
17  
18  
19  
20  
21  
22  
23  
24  
25  
26  
27  
28  
29  
30  
31  
32  
33  
34  
35  
36  
37  
38  
39  
40  
41  
42  
43  
44  
45  
46  
47

**The RECORD statement – checklist of items, extended from the STROBE statement, that should be reported in observational studies using routinely collected health data.**

|                           | Item No. | STROBE items                                                                                                                                                                               | Location in manuscript where items are reported | RECORD items                                                                                                                                                                                                                                                                                                                                                                                                                                | Location in manuscript where items are reported           |
|---------------------------|----------|--------------------------------------------------------------------------------------------------------------------------------------------------------------------------------------------|-------------------------------------------------|---------------------------------------------------------------------------------------------------------------------------------------------------------------------------------------------------------------------------------------------------------------------------------------------------------------------------------------------------------------------------------------------------------------------------------------------|-----------------------------------------------------------|
| <b>Title and abstract</b> |          |                                                                                                                                                                                            |                                                 |                                                                                                                                                                                                                                                                                                                                                                                                                                             |                                                           |
|                           | 1        | (a) Indicate the study’s design with a commonly used term in the title or the abstract (b) Provide in the abstract an informative and balanced summary of what was done and what was found | Title page 1, abstract page 2.                  | RECORD 1.1: The type of data used should be specified in the title or abstract. When possible, the name of the databases used should be included.<br><br>RECORD 1.2: If applicable, the geographic region and timeframe within which the study took place should be reported in the title or abstract.<br><br>RECORD 1.3: If linkage between databases was conducted for the study, this should be clearly stated in the title or abstract. | Title, abstract page 2.<br><br>Abstract page 2<br><br>N/A |
| <b>Introduction</b>       |          |                                                                                                                                                                                            |                                                 |                                                                                                                                                                                                                                                                                                                                                                                                                                             |                                                           |
| Background rationale      | 2        | Explain the scientific background and rationale for the investigation being reported                                                                                                       | Introduction Page 4                             |                                                                                                                                                                                                                                                                                                                                                                                                                                             |                                                           |
| Objectives                | 3        | State specific objectives, including any prespecified hypotheses                                                                                                                           | Introduction Page 5                             |                                                                                                                                                                                                                                                                                                                                                                                                                                             |                                                           |
| <b>Methods</b>            |          |                                                                                                                                                                                            |                                                 |                                                                                                                                                                                                                                                                                                                                                                                                                                             |                                                           |
| Study Design              | 4        | Present key elements of study design early in the paper                                                                                                                                    | Methods pages 7 to 8                            |                                                                                                                                                                                                                                                                                                                                                                                                                                             |                                                           |
| Setting                   | 5        | Describe the setting, locations, and relevant dates, including periods of recruitment, exposure, follow-up, and data collection                                                            | Methods page 6 and 7                            |                                                                                                                                                                                                                                                                                                                                                                                                                                             |                                                           |
| Participants              | 6        | (a) <i>Cohort study</i> - Give the eligibility criteria, and the sources and methods of selection of participants. Describe methods of follow-up                                           | Methods page 6                                  | RECORD 6.1: The methods of study population selection (such as codes or algorithms used to identify subjects) should be listed in detail. If this is not possible, an                                                                                                                                                                                                                                                                       | Methods Page 6, supplemental figure 1                     |

|                              |    |                                                                                                                                                                                                                                                                                                                                                                                                                                                                                                                                                                      |                       |                                                                                                                                                                                                                                                                                                                                                                                                                                                                                                                                |                                                          |
|------------------------------|----|----------------------------------------------------------------------------------------------------------------------------------------------------------------------------------------------------------------------------------------------------------------------------------------------------------------------------------------------------------------------------------------------------------------------------------------------------------------------------------------------------------------------------------------------------------------------|-----------------------|--------------------------------------------------------------------------------------------------------------------------------------------------------------------------------------------------------------------------------------------------------------------------------------------------------------------------------------------------------------------------------------------------------------------------------------------------------------------------------------------------------------------------------|----------------------------------------------------------|
|                              |    | <p><i>Case-control study</i> - Give the eligibility criteria, and the sources and methods of case ascertainment and control selection. Give the rationale for the choice of cases and controls</p> <p><i>Cross-sectional study</i> - Give the eligibility criteria, and the sources and methods of selection of participants</p> <p>(b) <i>Cohort study</i> - For matched studies, give matching criteria and number of exposed and unexposed</p> <p><i>Case-control study</i> - For matched studies, give matching criteria and the number of controls per case</p> |                       | <p>explanation should be provided.</p> <p>RECORD 6.2: Any validation studies of the codes or algorithms used to select the population should be referenced. If validation was conducted for this study and not published elsewhere, detailed methods and results should be provided.</p> <p>RECORD 6.3: If the study involved linkage of databases, consider use of a flow diagram or other graphical display to demonstrate the data linkage process, including the number of individuals with linked data at each stage.</p> | N/A                                                      |
| Variables                    | 7  | Clearly define all outcomes, exposures, predictors, potential confounders, and effect modifiers. Give diagnostic criteria, if applicable.                                                                                                                                                                                                                                                                                                                                                                                                                            | Methods page 6 and 7  | RECORD 7.1: A complete list of codes and algorithms used to classify exposures, outcomes, confounders, and effect modifiers should be provided. If these cannot be reported, an explanation should be provided.                                                                                                                                                                                                                                                                                                                | Methods page 6 (description of data selection, no codes) |
| Data sources/<br>measurement | 8  | For each variable of interest, give sources of data and details of methods of assessment (measurement). Describe comparability of assessment methods if there is more than one group                                                                                                                                                                                                                                                                                                                                                                                 | Methods Page 6        |                                                                                                                                                                                                                                                                                                                                                                                                                                                                                                                                |                                                          |
| Bias                         | 9  | Describe any efforts to address potential sources of bias                                                                                                                                                                                                                                                                                                                                                                                                                                                                                                            |                       |                                                                                                                                                                                                                                                                                                                                                                                                                                                                                                                                |                                                          |
| Study size                   | 10 | Explain how the study size was arrived at                                                                                                                                                                                                                                                                                                                                                                                                                                                                                                                            | Supplemental figure 1 |                                                                                                                                                                                                                                                                                                                                                                                                                                                                                                                                |                                                          |
| Quantitative variables       | 11 | Explain how quantitative variables were handled in the analyses. If applicable, describe which groupings were chosen, and why                                                                                                                                                                                                                                                                                                                                                                                                                                        | Methods Page 6 and 7  |                                                                                                                                                                                                                                                                                                                                                                                                                                                                                                                                |                                                          |
| Statistical methods          | 12 | (a) Describe all statistical methods, including those used to control for confounding<br>(b) Describe any methods used to                                                                                                                                                                                                                                                                                                                                                                                                                                            | Methods Page 6 and 7  |                                                                                                                                                                                                                                                                                                                                                                                                                                                                                                                                |                                                          |

1  
2  
3  
4  
5  
6  
7  
8  
9  
10  
11  
12  
13  
14  
15  
16  
17  
18  
19  
20  
21  
22  
23  
24  
25  
26  
27  
28  
29  
30  
31  
32  
33  
34  
35  
36  
37  
38  
39  
40  
41  
42  
43  
44  
45  
46  
47

|                                  |    |                                                                                                                                                                                                                                                                                                                                                                                                                                                                       |                                          |                                                                                                                                                                                                                                                                                                                         |                                                                              |
|----------------------------------|----|-----------------------------------------------------------------------------------------------------------------------------------------------------------------------------------------------------------------------------------------------------------------------------------------------------------------------------------------------------------------------------------------------------------------------------------------------------------------------|------------------------------------------|-------------------------------------------------------------------------------------------------------------------------------------------------------------------------------------------------------------------------------------------------------------------------------------------------------------------------|------------------------------------------------------------------------------|
|                                  |    | <p>examine subgroups and interactions</p> <p>(c) Explain how missing data were addressed</p> <p>(d) <i>Cohort study</i> - If applicable, explain how loss to follow-up was addressed</p> <p><i>Case-control study</i> - If applicable, explain how matching of cases and controls was addressed</p> <p><i>Cross-sectional study</i> - If applicable, describe analytical methods taking account of sampling strategy</p> <p>(e) Describe any sensitivity analyses</p> |                                          |                                                                                                                                                                                                                                                                                                                         |                                                                              |
| Data access and cleaning methods |    | ..                                                                                                                                                                                                                                                                                                                                                                                                                                                                    |                                          | <p>RECORD 12.1: Authors should describe the extent to which the investigators had access to the database population used to create the study population.</p> <p>RECORD 12.2: Authors should provide information on the data cleaning methods used in the study.</p>                                                     | <p>Acknowledgement section; contributions, page 15</p> <p>Methods Page 6</p> |
| Linkage                          |    | ..                                                                                                                                                                                                                                                                                                                                                                                                                                                                    |                                          | <p>RECORD 12.3: State whether the study included person-level, institutional-level, or other data linkage across two or more databases. The methods of linkage and methods of linkage quality evaluation should be provided.</p>                                                                                        | No linkage                                                                   |
| <b>Results</b>                   |    |                                                                                                                                                                                                                                                                                                                                                                                                                                                                       |                                          |                                                                                                                                                                                                                                                                                                                         |                                                                              |
| Participants                     | 13 | <p>(a) Report the numbers of individuals at each stage of the study (<i>e.g.</i>, numbers potentially eligible, examined for eligibility, confirmed eligible, included in the study, completing follow-up, and analysed)</p> <p>(b) Give reasons for non-participation</p>                                                                                                                                                                                            | Supplemental figure 1 and Results page 8 | <p>RECORD 13.1: Describe in detail the selection of the persons included in the study (<i>i.e.</i>, study population selection) including filtering based on data quality, data availability and linkage. The selection of included persons can be described in the text and/or by means of the study flow diagram.</p> | <p>Methods, page 6; Results page 8 and supplemental figure 1</p>             |

|                   |    |                                                                                                                                                                                                                                                                                                                                                                                                                          |                                                        |  |  |
|-------------------|----|--------------------------------------------------------------------------------------------------------------------------------------------------------------------------------------------------------------------------------------------------------------------------------------------------------------------------------------------------------------------------------------------------------------------------|--------------------------------------------------------|--|--|
|                   |    | at each stage.<br>(c) Consider use of a flow diagram                                                                                                                                                                                                                                                                                                                                                                     |                                                        |  |  |
| Descriptive data  | 14 | (a) Give characteristics of study participants ( <i>e.g.</i> , demographic, clinical, social) and information on exposures and potential confounders<br>(b) Indicate the number of participants with missing data for each variable of interest<br>(c) <i>Cohort study</i> - summarise follow-up time ( <i>e.g.</i> , average and total amount)                                                                          |                                                        |  |  |
| Outcome data      | 15 | <i>Cohort study</i> - Report numbers of outcome events or summary measures over time<br><i>Case-control study</i> - Report numbers in each exposure category, or summary measures of exposure<br><i>Cross-sectional study</i> - Report numbers of outcome events or summary measures                                                                                                                                     | All supplemental tables; supplemental tables 10a and b |  |  |
| Main results      | 16 | (a) Give unadjusted estimates and, if applicable, confounder-adjusted estimates and their precision ( <i>e.g.</i> , 95% confidence interval). Make clear which confounders were adjusted for and why they were included<br>(b) Report category boundaries when continuous variables were categorized<br>(c) If relevant, consider translating estimates of relative risk into absolute risk for a meaningful time period | Results Pages 8 to 11, Supplemental tables             |  |  |
| Other analyses    | 17 | Report other analyses done— <i>e.g.</i> , analyses of subgroups and interactions, and sensitivity analyses                                                                                                                                                                                                                                                                                                               | Results Page 11                                        |  |  |
| <b>Discussion</b> |    |                                                                                                                                                                                                                                                                                                                                                                                                                          |                                                        |  |  |
| Key results       | 18 | Summarise key results with reference to study objectives                                                                                                                                                                                                                                                                                                                                                                 | Discussion Page 12                                     |  |  |



1  
2  
3  
4  
5  
6  
7  
8  
9  
10  
11  
12  
13  
14  
15  
16  
17  
18  
19  
20  
21  
22  
23  
24  
25  
26  
27  
28  
29  
30  
31  
32  
33  
34  
35  
36  
37  
38  
39  
40  
41  
42  
43  
44  
45  
46  
47

|                                                           |    |                                                                                                                                                                            |                        |                                                                                                                                                                                                                                                                                                          |                           |
|-----------------------------------------------------------|----|----------------------------------------------------------------------------------------------------------------------------------------------------------------------------|------------------------|----------------------------------------------------------------------------------------------------------------------------------------------------------------------------------------------------------------------------------------------------------------------------------------------------------|---------------------------|
| Limitations                                               | 19 | Discuss limitations of the study, taking into account sources of potential bias or imprecision. Discuss both direction and magnitude of any potential bias                 | Discussion Pages 13    | RECORD 19.1: Discuss the implications of using data that were not created or collected to answer the specific research question(s). Include discussion of misclassification bias, unmeasured confounding, missing data, and changing eligibility over time, as they pertain to the study being reported. | Discussion Pages 12 to 13 |
| Interpretation                                            | 20 | Give a cautious overall interpretation of results considering objectives, limitations, multiplicity of analyses, results from similar studies, and other relevant evidence | Discussion Pages 11-13 |                                                                                                                                                                                                                                                                                                          |                           |
| Generalisability                                          | 21 | Discuss the generalisability (external validity) of the study results                                                                                                      | Discussion Page 14     |                                                                                                                                                                                                                                                                                                          |                           |
| <b>Other Information</b>                                  |    |                                                                                                                                                                            |                        |                                                                                                                                                                                                                                                                                                          |                           |
| Funding                                                   | 22 | Give the source of funding and the role of the funders for the present study and, if applicable, for the original study on which the present article is based              | Page 1 and page 15     |                                                                                                                                                                                                                                                                                                          |                           |
| Accessibility of protocol, raw data, and programming code |    | ..                                                                                                                                                                         | N/A                    | RECORD 22.1: Authors should provide information on how to access any supplemental information such as the study protocol, raw data, or programming code.                                                                                                                                                 | N/A                       |

# BMJ Open

## Assessing the non-inferiority of prosthesis constructs used in hip replacement using data from the National Joint Registry of England, Wales, Northern Ireland and the Isle of Man: A Benchmarking study

|                                 |                                                                                                                                                                                                                                                                                                              |
|---------------------------------|--------------------------------------------------------------------------------------------------------------------------------------------------------------------------------------------------------------------------------------------------------------------------------------------------------------|
| Journal:                        | <i>BMJ Open</i>                                                                                                                                                                                                                                                                                              |
| Manuscript ID                   | bmjopen-2018-026685.R1                                                                                                                                                                                                                                                                                       |
| Article Type:                   | Research                                                                                                                                                                                                                                                                                                     |
| Date Submitted by the Author:   | 25-Jan-2019                                                                                                                                                                                                                                                                                                  |
| Complete List of Authors:       | Deere, Kevin; University of Bristol, School of Social & Community Medicine<br>Whitehouse, Michael; University of Bristol, Musculoskeletal Research Unit<br>Porter, Martyn; Wrightington Hospital<br>Blom, AW; University of Bristol,<br>Sayers, Adrian; University of Bristol, Musculoskeletal Research Unit |
| <b>Primary Subject Heading</b>: | Surgery                                                                                                                                                                                                                                                                                                      |
| Secondary Subject Heading:      | Patient-centred medicine                                                                                                                                                                                                                                                                                     |
| Keywords:                       | hip arthroplasty, non-inferiority, National Joint Registry, benchmarking, medical devices                                                                                                                                                                                                                    |
|                                 |                                                                                                                                                                                                                                                                                                              |

SCHOLARONE™  
Manuscripts

1  
2  
3 **Assessing the non-inferiority of prosthesis constructs used in hip replacement using data from the**  
4 **National Joint Registry of England, Wales, Northern Ireland and the Isle of Man: A Benchmarking**  
5 **study.**  
6  
7

8 Kevin Deere, Michael R Whitehouse, Martyn L Porter, Ashley W Blom, Adrian Sayers  
9

10 Musculoskeletal Research Unit, Bristol Medical School, 1st Floor Learning & Research Building,  
11 Southmead Hospital, Bristol, BS10 5NB, UK  
12

13 Kevin Deere  
14 Senior research Associate  
15

16 Michael R Whitehouse  
17 Reader in Trauma and Orthopaedics  
18

19 Ashley W Blom  
20 Professor of Orthopaedic Surgery and Head of Translational Health Sciences  
21

22 Adrian Sayers  
23 Senior Research Fellow  
24

25 National Institute for Health Research Bristol Biomedical Research Centre, University of Bristol  
26

27 Michael R Whitehouse  
28 Reader in Trauma and Orthopaedics  
29

30 Ashley W Blom  
31 Professor of Orthopaedic Surgery and Head of Translational Health Sciences  
32

33 Centre for Hip Surgery, Wrightington Hospital, Lancashire, WN6 9EP, UK  
34

35 Martyn L Porter  
36 Consultant Orthopaedic Surgeon  
37

38 Bristol Medical School, Population Health Sciences, University of Bristol, Bristol, UK  
39

40 Adrian Sayers  
41 Senior Research Fellow  
42

43 **Corresponding author:** Adrian Sayers  
44

45 Musculoskeletal Research Unit,  
46 1st Floor Learning & Research Building,  
47 Southmead Hospital,  
48 Bristol,  
49 BS10 5NB, UK

50 Email: [adrian.sayers@bristol.ac.uk](mailto:adrian.sayers@bristol.ac.uk)

51 Tel: 0117 4147880  
52  
53  
54

55 **Word count:** 4,797  
56  
57  
58  
59  
60

## ABSTRACT

**Objectives** To investigate the relative performance of hip prosthesis constructs as compared to the best performing prosthesis constructs and illustrate the substantial variability in performance of currently used prostheses.

**Design** A non-inferiority study.

**Setting** The National Joint Registry for England, Wales, Northern Ireland and the Isle of Man (NJR)

**Participants** All patients with a primary total hip replacement registered in the NJR between 1<sup>st</sup> April 2003 and 31<sup>st</sup> December 2016.

**Main outcome measures** Kaplan-Meier failure function for hip prosthesis constructs. Failure difference between best performing construct and remaining constructs.

**Methods** Using a non-inferiority analysis, the performance of hip prosthesis constructs by brand were compared to the best performing contemporary construct. Construct failure was estimated using the 1-Kaplan Meier method, i.e. an estimate of net failure. The difference in failure between the contemporary benchmark and all other constructs was tested.

**Results** Of the 4,442 constructs used, only 134 had  $\geq 500$  procedures at risk at 3 years post-surgery, 89 of which were not demonstrated to be inferior to the benchmark by at least 100% relative risk. By 10 years post-surgery there were 26 constructs with  $\geq 500$  at risk, 13 of which were not demonstrated to be inferior by at least 20% relative risk.

Even fewer constructs were not inferior to the benchmark when analysed by age and gender. At 5 years post-surgery there were 15 constructs in males and 11 in females, aged 55-75, not shown to be inferior.

**Conclusions** There is great variability in construct performance and the majority of constructs have not been demonstrated to be non-inferior to contemporary benchmarks. We have a duty to inform patients, clinicians and commissioners of this variability in performance.

**ARTICLE SUMMARY****Strengths and limitations of this study**

- Data collected from the largest joint registry in the world
- For the first time we have explicitly compared the performance of prosthesis constructs to a contemporary reference.
- Unambiguous presentation of data allows surgeons, patients and policy makers to directly compare commonly used prosthesis constructs to a reference construct.
- Residual and unmeasured confounding factors are likely to be present.
- The number of patients remaining at risk after extended follow up is low, and therefore the power to detect non-inferiority after extended follow up is also low.

## INTRODUCTION

When patients are considering a hip replacement, they would be forgiven for thinking that all hip prostheses function equally.[1] However, all prostheses are not equal as evidenced by the failure of the 3M Capital hip implant, and Metal-on-Metal bearings.[2] The extent to which patients and clinicians are aware of this lack of equality is unclear.

The National Joint Registry for England, Wales, Northern Ireland and the Isle of Man (NJR) was established to monitor the effectiveness of different types of joint replacement surgery, improve clinical standards and to identify poorly performing implants. It has not focused on identifying exceptionally well performing implants due to limitations inherent with routine data collection and interpreting data from a standpoint of cause and effect. The NJR publishes the unadjusted cumulative failure rates of the most commonly used stem and cup brand combinations used in hip replacement surgery.[3]

Therefore the role of promoting perceived good practice has been filled by other organisations such as the Orthopaedic Device Evaluation Panel (ODEP) in the UK,[4] NOV in the Netherlands,[5] and the Australian superior clinical performance program.[6] Benchmarking bodies typically attempt to provide some type of classification to describe whether an implant is functioning at an acceptable level or not.

In the absence of evidence from randomised control trials, benchmarking organisations and prostheses registries are currently the best sources of evidence for prosthesis performance. However, both registries and benchmarking bodies have limitations which make the interpretation of prosthesis, or prosthesis construct, performance difficult. The cumulative failure reported by the NJR gives an indication of implant construct performance in absolute terms, but head-to-head comparison of different constructs is difficult to estimate without more advanced statistical manipulation. The ODEP grading system is focused on individual implants rather than the constructs they form and is based on meeting an acceptable externally decided benchmark. This simple dichotomisation does not facilitate comparison between the many different prosthesis constructs being used today or illustrate the extensive variability in so called well performing prostheses.[7]

Sayers et al. recently proposed a method of comparison for joint replacement prostheses using a non-inferiority design against an external benchmark.[8] However, the primary limitation of this method is the arbitrary requirement for an externally specified benchmark.

In a non-inferiority clinical trial[9] that has failure as an outcome, two treatments (comparator and reference) can be directly compared to ensure that the comparator treatment is within a clinically

1  
2  
3 acceptable range (non-inferiority margin) of the performance of the reference treatment at a  
4 specified point in time.[10, 11] Therefore, standard methods for conducting non-inferiority trials  
5 could be applied in an orthopaedic benchmarking setting, assuming an appropriate comparator,  
6 non-inferiority margin, and time of interest can be identified. This is a method we have applied in a  
7 medical device setting, namely knee replacements using NJR data, in which we assessed the non-  
8 inferiority of knee replacement constructs as compared to a benchmark construct.[12]  
9  
10  
11  
12

13  
14 Choosing an appropriate contemporary reference is difficult. There is no evidence from randomised  
15 trials that suggests any prosthesis construct outperforms all others, therefore the choice of  
16 reference is more heuristic. Patients would like to receive the best available care and clinicians  
17 would like to provide the best possible care, or at least care that it is non-inferior to the best.  
18 Therefore, the natural choice of reference against which all other prostheses should be compared is  
19 the construct with the lowest failure rate. However, in order to protect against chance, good fortune  
20 and a low observed failure rate, the construct should be used in large enough numbers to mitigate  
21 sampling variability.  
22  
23  
24  
25  
26  
27

28 As the failure rate of prostheses is known to be influenced by both age and gender, the choice of  
29 reference should reflect this specificity.[13] Whereas the selection of an appropriate time and non-  
30 inferiority margin to assess prosthesis performance is much more subjective, as is the reader's  
31 specific interest. For example, a surgeon interested in an older patient with lower life expectancy,  
32 may be interested in minimising short-term complications opposed to ensuring long-term implant  
33 survivorship.  
34  
35  
36  
37  
38

39 The aim of this study is to investigate the relative performance of hip prosthesis constructs as  
40 compared to the best performing prosthesis constructs using a non-inferiority study design, and  
41 illustrate the substantial variability in performance of currently used prostheses. Stem, bearing and  
42 cup brand combinations (constructs) are examined against non-inferiority margins of 20% relative  
43 risk and 100% relative risk at 3, 5, 7 and 10 years following surgery.  
44  
45  
46  
47  
48  
49  
50  
51  
52  
53  
54  
55  
56  
57  
58  
59  
60

## METHODS

### Patients and Data Sources

We identified all patients with a primary total hip replacement (THR) registered in the NJR between 1<sup>st</sup> April 2003 and 31<sup>st</sup> December 2016. All patients were consented to be included in the NJR as part of the standard NJR process.

Procedures were included if the bearing surface was either Metal-on-Polyethylene (MoP), Ceramic-on-Polyethylene (CoP) or Ceramic-on-Ceramic (CoC). Procedures using any other bearing surfaces were excluded as were hemiarthroplasty procedures. Procedures were also excluded if the patient age and gender were missing, or the National Health Service (NHS) number was untraceable and therefore mortality unknown. Metal-on-Metal prosthesis constructs were excluded as their very high failure rates across all ages and both genders have already been demonstrated[2, 14] and their use no longer reflects contemporary practice.[7]

### Patient and public involvement

Patient representatives sit on the committee structure of the National Joint Registry. The research priorities of the National Joint Registry are identified by this committee structure and approved by the patient representatives. Patients were not involved in the setting of the research question or the outcome measures, nor were they involved in designing or implementing this work or interpretation of the results. We are unable to disseminate results of this study directly to study participants due to the anonymous nature of the data. We plan to disseminate our findings to the National Joint Registry, via their communications team, to consultations relevant to the provision of joint replacement and to the general population through the local and national press.

### Primary Exposure

The primary exposure used in this analysis is hip prosthesis construct. This is defined by the femoral stem, acetabular cup combination and bearing combination. Groupings were defined using data recorded by the NJR and based on the catalogue numbers of individual hip prosthesis.

### Statistical methods

Using a non-inferiority analysis, the performance of hip prosthesis constructs were compared to an internally identified reference group. Prosthesis construct failure was estimated using the 1-Kaplan Meier method i.e. an estimate of net failure.

Failure is defined using the first linked surgical revision; patients were censored at death or administratively censored on 31<sup>st</sup> December 2016. In a recent national audit of NJR procedure



1  
2  
3 recording compliance [15] the percentage capture rates were 95.7% and 90.3% for primary and  
4 revision procedures respectively. The difference in stratum specific failure probabilities compared to  
5 the reference were calculated at 3, 5, 7 and 10 years for all prosthesis (stem-cup) combinations,  
6 stratified by gender, and stratified by gender and age group (<55 years, 55 to 75 years, >75 years).  
7  
8  
9

10 The difference and 95% confidence interval (CI) of the difference between the comparator  
11 prosthesis construct and the reference prosthesis construct was estimated at the specified time  
12 points. The standard error of the difference was constructed using a pooled estimate of the  
13 Greenwood Standard error,[16]  
14  
15  
16

$$17 \quad SE(\widehat{Diff}) = \sqrt{GSE_x^2 + GSE_{ref}^2},$$

18  
19  
20 and a z-test comparing the difference between the reference and test prosthesis was then  
21 constructed,  
22  
23

$$24 \quad Z = \left( (\widehat{F}_{test} - \widehat{F}_{ref}) + \delta \right) / SE(\widehat{Diff}).$$

25  
26  
27 The stratum specific contemporaneous reference construct was selected as the stem-cup  
28 combination with the lowest failure rate with at least 1,000 patients at risk at the time point of  
29 interest. The choice of 1,000 procedures of the same construct was based on simulation work by  
30 Sayers et al. which demonstrated that 1,000 procedures at risk will give rise to a confidence interval  
31 width of approximately 3% ( $\pm 1.5\%$ ).[8] We believe this represents an acceptable minimal level of  
32 accuracy to be considered a suitable reference standard.  
33  
34  
35  
36  
37

38 Two non-inferiority margins were chosen to illustrate the sensitivity of the choice. The first margin  
39 was conservatively set at a 20% increase in relative risk of failure compared to the reference, in line  
40 with clinical trials using this methodology, albeit towards the upper end.[17] The second was a 100%  
41 increase in relative risk, i.e. a doubling in cumulative probability of failure, as this is an easily  
42 interpretable outcome.  
43  
44  
45  
46

47 If a construct had 500 or more patients still at risk, at each time-point, we calculated the difference  
48 in failure between that construct and the reference construct. Results are graphically reported for all  
49 comparator prosthesis constructs meeting this criterion at each time point of interest. These figures  
50 show the failure difference for each construct against the reference and the number of constructs  
51 still at risk. The threshold for graphical presentation, 500 procedures, was chosen based on the  
52 previous work of Sayers et al.[8] as this would give risk to an individual confidence interval width of  
53 approximately 5% ( $\pm 2.5\%$ ), and because it complements the number of procedures at risk used by  
54 ODEP when evaluating devices at 10 years. However, as this decision is somewhat arbitrary, we also  
55  
56  
57  
58  
59  
60

1  
2  
3 present results in a tabular format for all comparator prosthesis constructs with at least 250 patients  
4 at risk at the beginning of the time point of interest (See supplementary tables).  
5  
6

7 Prosthesis constructs were either classified as non-inferior, inconclusive, or inferior. If the upper  
8 confidence interval is less than or equal to the 20% non-inferiority margin, the prosthesis construct  
9 was non-inferior. If the lower confidence interval of the difference was greater than the non-  
10 inferiority margin at either 20% or 100% the prosthesis construct was classed as inferior at 20% or  
11 100% respectively. If the lower confidence limit is less than the non-inferiority margin, and the upper  
12 confidence greater than non-inferiority margin the construct was described as inconclusive, see  
13 figure 1 for graphical representation of the classification.  
14  
15  
16  
17  
18

### 19 **Sensitivity analysis**

20  
21 We repeated all analyses using a historic reference group, this specified the reference at 3, 5, and 7  
22 years as the best performing stem-cup prosthesis construct at 10 years with at least 1,000 still at risk  
23 in the stratum of interest.  
24  
25

26  
27 All analyses were carried out using Stata 14.2 (College Station, Texas, USA).  
28  
29  
30  
31  
32  
33  
34  
35  
36  
37  
38  
39  
40  
41  
42  
43  
44  
45  
46  
47  
48  
49  
50  
51  
52  
53  
54  
55  
56  
57  
58  
59  
60

## RESULTS

There were 890,681 primary hip replacements included in the NJR between 1<sup>st</sup> April 2003 and 31<sup>st</sup> December 2016. Following the application of the exclusion criteria defined above, 797,178 procedures were included in the final analysis, see supplementary figure 1. In total 4,442 different prosthesis constructs were used at least once. A detailed description of non-inferiority across all procedures is provided. Due to the large number of clinically relevant subdivisions and sensitivity analyses, results will be described more broadly. Constructs are described using by bearing and brand. Bearings are either ceramic (C), metal (M) or polythene (P). Brands are described listing the stem and cup combination [stem/cup].

Figures were produced for each stratification of gender, age group and time since primary. To view data at 3 years post primary for all men, men<55 years, men aged 55-75 and men>75 years see supplementary figures 2a, 2b, 2c and 2d respectively. To view data at 5 years post primary for all men, men<55 years, men aged 55-75 and men>75 years see supplementary figures 3a, 3b, 3c and 3d respectively. To view data at 7 years post primary for all men, men aged 55-75 and men>75 years see supplementary figures 4a, 4b, and 4c respectively. To view data at 10 years post primary for all men and men aged 55-75 see supplementary figures 5a and 5b respectively. To view data at 3 years post primary for all women, women<55 years, women aged 55-75 and women>75 years see supplementary figures 6a, 6b, 6c and 6d respectively. To view data at 5 years post primary for all women, women<55 years, women aged 55-75 and women>75 years see supplementary figures 7a, 7b, 7c and 7d respectively. To view data at 7 years post primary for all women, women<55 years, women aged 55-75 and women>75 years see supplementary figures 8a, 8b, 8c and 8d respectively. To view data at 10 years post primary for all women and women aged 55-75 see supplementary figures 9a and 9b respectively

Estimates for the difference in failure between the reference and comparator prosthesis constructs with  $\geq 250$  procedure at risk at the time of interest for all, and for each stratification of gender and age group were tabulated. To view data for all at 3, 5, 7 and 10 years post primary see supplementary tables 1a, 1b, 1c and 1d respectively. To view data in all women at 3, 5, 7 and 10 years post primary see supplementary tables 2a, 2b, 2c and 2d respectively. To view data for women <55 years at 3, 5 and 7 years post primary see supplementary tables 3a, 3b and 3c respectively. To view data for women between 55-75 years at 3, 5, 7 and 10 years post primary see supplementary tables 4a, 4b, 4c and 4d respectively. To view data for women >75 years at 3, 5 and 7 years post primary see supplementary tables 5a, 5b and 5c respectively. To view data in all men at 3, 5, 7 and 10 years post primary see supplementary tables 6a, 6b, 6c and 6d respectively. To view data in men <55 years at 3 and 5 years post primary see supplementary tables 7a and 7b respectively. To view

1  
2  
3 data in men between 55 and 75 years at 3, 5, 7 and 10 years post primary see supplementary tables  
4 8a, 8b, 8c and 8d respectively. To view data in men >75 years at 3, 5 and 7 years post primary see  
5 supplementary tables 9a, 9b and 9c respectively. In this analysis there were 415,608 implants at risk  
6 at 3 years (in constructs with at least 500 procedures) and 41,908 at 10 years. Of these there were  
7 3,733 implant failures at 3 years and 1,325 at 10 years. The total number of implants at risk and total  
8 implant failures for each subdivision and time-point can be seen in supplementary tables 10a and  
9 10b respectively.  
10  
11  
12  
13  
14  
15  
16  
17

### 18 **Non-inferiority - All procedures**

19  
20 The reference prosthesis construct at 3 years was identified as the CoP MS-30/Low profile Muller.  
21 There were 1,554 procedures remaining at risk and the failure rate was 0.39% (95%CI 0.19 – 0.82).  
22 There were 134 prosthesis combinations with  $\geq 500$  procedures at risk. 90 combinations were  
23 classified as inferior to the reference by at least 20% relative risk of failure. 44 of the 90 were shown  
24 to be inferior by at least 100% relative risk (figure 2). No prosthesis constructs could be described as  
25 non-inferior.  
26  
27  
28  
29

30  
31 The reference prosthesis construct at 5 years was again identified as CoP MS-30/Low profile Muller.  
32 There were 1,125 procedures remaining at risk and the failure rate was 0.55% (95%CI 0.29 – 1.08).  
33 There were 99 prosthesis constructs with  $\geq 500$  procedures at risk. 74 prosthesis constructs were  
34 classified as inferior to the reference by at least 20% relative risk of failure. 39 of the 74 were shown  
35 to be inferior by at least 100% relative risk (figure 3). No prosthesis constructs could be described as  
36 non-inferior.  
37  
38  
39  
40

41  
42 The reference prosthesis constructs at 7 years was identified as the MoP Exeter V40/Elite Plus  
43 Cemented Cup. There were 1,173 procedures remaining at risk and the failure rate was 0.91%  
44 (95%CI 0.64 – 1.28). There were 69 prosthesis constructs with  $\geq 500$  procedures at risk. 48 prosthesis  
45 constructs were classified as inferior to the reference by at least 20% relative risk of failure. 20 of the  
46 48 were shown to be inferior by at least 100% relative risk (figure 4). No prosthesis constructs could  
47 be described as non-inferior.  
48  
49  
50

51  
52 The reference prosthesis constructs at 10 years was identified as the MoP Exeter V40/Elite Plus  
53 Ogee. There were 3,580 procedures remaining at risk and the failure rate was 2.14% (95%CI 1.87 –  
54 2.45). There were 26 prosthesis constructs with  $\geq 500$  procedures at risk. 12 prosthesis constructs  
55 were classified as inferior to the reference by at least 20% relative risk of failure. 1 of the 12 was  
56  
57  
58  
59  
60

1  
2  
3 shown to be inferior by at least 100% relative risk (figure 5). Two prosthesis constructs were  
4 identified as non-inferior.  
5

#### 6 7 **Non-inferiority - Gender specific.** 8

9 Gender specific non-inferiority analyses were also performed at 3, 5, 7, and 10 years after the  
10 primary operation.  
11

12  
13 At 3 years only a small number of prosthesis constructs demonstrated non-inferiority in comparison  
14 to the reference. Most striking is the large variability of prosthesis constructs used in females  
15 compared to males (58 different prosthesis constructs were used more than 500 times in males  
16 versus 93 in females), and the gender specific heterogeneity in performance. For example, the CoP  
17 Exeter V40/Exeter Contemporary Flanged is used as the reference at 3 years in males, yet is inferior  
18 by 20% compared to the reference in females at 3 years. A performance difference was also noted in  
19 the CoC SL-Plus cementless Stem/EP-Fit Plus between the genders. At 3 years the failure rate for this  
20 prosthesis constructs in all females was 1.75% yet in males after the same period the failure was  
21 5.11% ( $p < 0.001$ ).  
22  
23  
24  
25  
26  
27  
28

29 At 5 years the reference failure rate in females is less than half that in males. Whilst there are only 3  
30 prosthesis constructs marked as 100% worse than the reference prosthesis construct in males, there  
31 are 24 prosthesis constructs that are 100% worse than the reference in females. Some prosthesis  
32 constructs have been used in large numbers despite having relatively poor performance.  
33  
34  
35

36 At 7 years the reference failure rate in females remained less than half that of males. There were no  
37 prosthesis constructs, used in sufficient numbers, which could be described as non-inferior to the  
38 reference in both males and females. One prosthesis construct in males was at least 100% worse  
39 than the reference, whilst 14 prosthesis constructs were at least 100% worse in females.  
40  
41  
42  
43

44 At 10 years no prosthesis constructs were described as non-inferior to the reference in both males  
45 and females and there were no implants inferior by 100% in either males or females.  
46  
47

#### 48 **Non-inferiority- Gender and Age specific.** 49

50 Sub-dividing procedures by age and gender highlights the paucity of information available pertaining  
51 to either male or female patients <55 years undergoing THR. Similarly, the volume of longer-term  
52 outcomes on patients beyond 7 years is relatively low in comparison to the number of implanted  
53 prosthesis constructs. Most strikingly is the preference for hard-on-hard bearing surfaces (such as  
54 CoC) in younger male patients (<55 years). Five of the six prosthesis constructs with at least 500  
55 procedures at 3 years were CoC, contrasted with the vast majority of prosthesis constructs used in  
56  
57  
58  
59  
60

1  
2  
3 older male patients ( $\geq 55$  years) where either MoP or CoP bearing couples were used. In addition,  
4 changes to the distribution of failure rates of prostheses become increasingly apparent. For  
5 example, the reference prosthesis construct in males less than 55 years at 3 years has a cumulative  
6 failure of 1.26%, whereas the failure rate of the reference in males over 75 years at 3 years has a  
7 cumulative failure of 0.78%. This is a 60% increase in relative failure rate of the reference procedure  
8 for younger males compared to the reference procedure for older males.  
9

10  
11  
12  
13  
14 The paucity of constructs in each age/gender group which have been utilised over 500 times and for  
15 which non-inferiority to the reference prosthesis construct is demonstrated is notable. For males  
16 <55 years, only 4 prosthesis constructs (including the reference construct) meet this requirement at  
17 3 years, 3 prosthesis constructs at 5 years and none thereafter. For women of the same age the  
18 numbers are 4 at 3 years, 3 at 5 years and 7 at 7 years, with none at 10 years. In the largest  
19 grouping, those aged between 55 and 75 years, for males, 16 prosthesis constructs meet this  
20 requirement at 5 years and only 7 at 10 years, whilst for women the number are 12 at 5 years and 9  
21 at 10 years.  
22  
23  
24  
25  
26  
27

### 28 **Sensitivity Analysis**

29  
30 We conducted a sensitivity analysis which used the reference prosthesis construct at 10 years as the  
31 reference at 3, 5, and 7 years. We assume that the failure trajectory of a non-inferior construct, will  
32 have the same, or lower failure rate compared to the reference construct at 3, 5, 7 and 10 years.  
33 This approach is conservative, as it preserves the status quo with respects implant performance. The  
34 reference construct in all procedures at 10 years is the Exeter V40/Elite Plus Ogee with a failure rate  
35 of 2.14% (95%CI 1.87 – 2.45). Only 1 prosthesis construct is non-inferior and statistically superior i.e.  
36 the Exeter V40/Elite Plus Cemented cup, but it does not have 1,000 implants at risk at 10 years and  
37 therefore is not considered to be the reference construct. At 7, 5, and 3 years, the contemporary  
38 reference has a 0.59%, a 0.55%, and 0.40% lower failure rate than the historical reference  
39 respectively. Whilst the good performance of many prosthesis constructs appear to track, some  
40 exhibit substantially variability in their relative performance at the times of interest. Specifically, the  
41 MoP Exeter V40/Charnley Ogee is non-inferior to the historical reference at 10 years, but is inferior  
42 by 20% at 5 years.  
43  
44  
45  
46  
47  
48  
49  
50  
51  
52  
53  
54  
55  
56  
57  
58  
59  
60

## DISCUSSION

We have demonstrated in 797,178 primary total hip replacements the relative performance of implanted prosthesis constructs in comparison to an internally selected contemporary reference. There is substantial variation in the performance of prosthesis constructs. A non-inferiority approach to benchmarking provides an immediate comparison of commonly used implanted prosthesis constructs compared to an internal contemporary reference and conveys distinct advantages opposed to standard Kaplan-Meier analyses as currently reported in the NJR annual reports or categorical grades provided by ODEP. The heterogeneity in implanted constructs in females compared to males is aptly illustrated, as is the paucity of information in clinically relevant sub-strata. The marked differences in outcomes between the different age/gender sub-strata confirm the importance of comparing prosthesis constructs within these strata.[13] We present this study as a novel way of assessing hip prosthesis constructs and as such there is, in the authors opinion, no relevant evidence published to date.

What is most striking is that so few prosthesis constructs in each age/gender strata meet the criteria of 500 cases at each time point and are at least classified as “inferiority not shown”. Of the 4,442 constructs used, only 7 meet these criteria in males aged 55-75 years (supplementary figure 5b) and 9 in females aged 55-75 years at 10 years (supplementary figure 9b). None meet the criteria in any other age/gender sub-strata at 10 years. Even at the relatively short follow-up of 5 years, only 16 constructs in men (supplementary figure 3c) and 12 in women age 55-75 years (supplementary figure 7c) meet these criteria. Patients would have a reasonable expectation that the implants they receive have a proven track record and have not been demonstrated as having a 20% or more increased revision rate for patients of the same age and gender. It is important to note that some prosthesis constructs have a higher early relative failure rate and a lower relative failure rate in later years and thus are inferior at 3, 5 and 7 years, but inferiority is not shown at 10 years. Examples of this in men aged 55-75 years are the MoP Corail/Pinnacle and MoP Exeter/Contemporary hooded, we believe this effect is principally driven by the lower failure of the reference at earlier timepoints, i.e. a reduction in revision rate with a later cohort. Late failure is preferential to early failure from the patient, societal and health economic perspectives, particularly as revision is unfortunately associated with a high rate of re-revision.[18]

One of the most obvious trends across all stratifications is the outstanding performance of the Exeter V40 stem as part of various prosthesis constructs. However, the heterogeneity in acetabular prostheses paired with the Exeter V40 stem is substantial, as is the subsequent variation in performance. This aptly illustrates the need to benchmark constructs opposed to individual implants which make up prosthesis constructs, which has the potential to provide false reassurance in terms

1  
2  
3 of efficacy as the individual elements of a construct are not independent. Patient specific construct  
4 selection is another strong feature of the data, with the majority of younger patient receiving CoC  
5 bearing surfaces, whereas the majority of older patients receive MoP bearing surfaces.  
6  
7

8  
9 This analysis does show that certain constructs are either the reference or are non-inferior to the  
10 reference prosthesis construct across almost all age and gender strata. This strongly suggests that  
11 they could appropriately be used as default options for the majority of patients. This is particularly  
12 relevant for inexperienced surgical teams, as they can focus training on, and become expert with, a  
13 single prosthesis construct. This has the potential to reduce the risk of technical error, to be cost  
14 saving through bulk purchasing arrangements and via a reduction in failure rates. The absolute level  
15 of failure of commonly used constructs is relatively low, and less than 5% in many instances. This  
16 apparently excellent (ODEP 10A\*) performance is exhibited by nearly all prosthesis constructs with  
17 sufficient data at 10 years ( $\geq 500$  patients at risk) and raises questions about whether an externally  
18 placed benchmark is the optimal way to ensure best care.  
19  
20  
21  
22  
23  
24

25  
26 Encouragingly, the sensitivity analysis demonstrates the prognosis for patients undergoing hip  
27 replacement is continually improving, and the currently best performing implant at 10 years is  
28 unlikely to be as good as the contemporary references at 3, 5, and 7 years when these reach 10  
29 years of follow up. Whilst the refinement of clinical practice and development of prosthesis  
30 constructs appears to be raising the bar in performance, it is clear that these improvements are not  
31 universal. This raises questions about how implants are introduced into a market safely; ensuring  
32 enough prosthesis constructs are implanted to ascertain their relative performance, but no more  
33 than the necessary number of prosthesis constructs are implanted to minimise the exposure of  
34 patients to poor performing implants, and finally to ensure there is sufficient incentive for implant  
35 manufacturers to develop new prostheses that benefit patients.  
36  
37  
38  
39  
40  
41  
42  
43

44 This analysis has a number of important strengths. We explicitly compare prosthesis constructs to a  
45 contemporary reference, and a historical defined reference with known performance using a non-  
46 inferiority study design. The unambiguous presentation of data allows surgeons, patients and policy  
47 makers to directly compare commonly used prosthesis constructs to a reference construct. We  
48 illustrate the paucity of information in clinically relevant sub-strata and the need to compare implant  
49 constructs opposed to implant elements. The analysis has a number of limitations; case-mix  
50 adjustment by stratification is difficult to assimilate despite the restricted set of confounding factors.  
51 Residual and unmeasured confounding factors are likely to be present, and the ability to interpret  
52 analyses from a causal perspective is limited. It is also known that revision rate is influenced by  
53 factors such as the primary indication. In this study there is a breadth of indications for the primary  
54  
55  
56  
57  
58  
59  
60



1  
2  
3 procedure however 89.1% (709,902) of procedures had osteoarthritis listed as the only reason for  
4 primary whereas fractured neck of femur was the reason for primary in 1,802 (0.2%) cases. The NJR  
5 annual report illustrates that neck of femur fracture is associated with a small increase in risk of  
6 revision in the first 6 months, but then revision rate is approximately equal to other patients.[3] The  
7 number of patients remaining at risk after extended follow up is low, and therefore the power to  
8 detect non-inferiority assuming there is truly no difference in prosthesis constructs compared to the  
9 reference is also low. This phenomenon is further compounded when we compare stratum specific  
10 performance of constructs at nearly all time points, whilst reducing the number of procedures  
11 required to be at risk may be appealing to increase the number of comparisons, the precision of  
12 those comparisons would be low, and therefore not informative. It is also possible that the  
13 constructs listed in this analysis may use a mixture of liner materials (i.e. cross-linked polyethylene  
14 (XLPE) and non-XLPE) which may lead to variation of revision rates within constructs. Data entry is  
15 mandated and data capture is extremely high (over 95%),[15] thus the findings in this study are  
16 highly likely to be generalisable. Furthermore, the reasons for failing to record those remaining  
17 primaries or revisions in the NJR is unlikely to be related to the choice of implant. Therefore, these data  
18 would be classified as missing completely at random and would be unlikely to bias our results.[19]

### 30 **Conclusions, policy and future research implications**

31  
32 The use of product benchmarking has the potential to be highly informative for patients, change the  
33 practice of surgeons, and influence policy makers if presented clearly and unambiguously. Clinical  
34 implications of this research are far reaching. We are unable to definitively state which construct is  
35 the best choice for all patients, due to the presence of selection effects and residual confounding.  
36 However, we believe that the information presented here illustrates the variability, frequency and  
37 performance of different constructs currently used in clinical practice. This in turn, should be used to  
38 further inform the consenting process between the patient and the surgeon, and facilitate implant  
39 selection. We believe commissioners and policy makers should consider the variability and  
40 performance of different implants before commissioning healthcare providers. Furthermore,  
41 qualitative research is required to understand why surgeons select new implants, with limited  
42 understanding of long-term performance, in favour of constructs with demonstrably low failure  
43 rates e.g. the [MoP] Exeter V40 Elite plus Ogee, [MoP] Exeter V40 Charnley Ogee, [MoP] Exeter V40  
44 Elite plus cemented cup which represented only approximately 1% of the 91,698 constructs  
45 implanted in the NJR in 2017. [3]

### **Acknowledgments**

We thank the patients and staff of all the hospitals who have contributed data to the National Joint Registry. We are grateful to the Healthcare Quality Improvement Partnership, the National Joint Registry Steering Committee, and staff at the National Joint Registry for facilitating this work. The views expressed represent those of the authors and do not necessarily reflect those of the NHS, the National Institute for Health Research, the Department of Health, the National Joint Registry Steering Committee or Healthcare Quality Improvement Partnership, who do not vouch for how the information is presented.

### **Funding**

Posts of members of the research team are funded by a contract grant from the National Joint Registry for England, Wales, Northern Ireland and the Isle of Man. This study was also supported by the NIHR Biomedical Research Centre at the University Hospitals Bristol NHS Foundation Trust and the University of Bristol. AS is funded by an MRC Strategic Skills Fellowship MR/L01226X/1.

### **Competing interest statement**

All authors have completed the Unified Competing Interest form at [www.icmje.org/coi\\_disclosure.pdf](http://www.icmje.org/coi_disclosure.pdf) (available on request from the corresponding author) and declare: funding was received for the submitted work as described in the Funding statement; no financial relationships with any organisations that might have an interest in the submitted work in the previous three years, no other relationships or activities that could appear to have influenced the submitted work.

### **Author Contributions**

AS, MRW and AWB conceived the study. KD, AS and AWB designed the study. The data were extracted by Northgate (Hemel Hempstead, UK). KD and AS managed and analysed data. MRW, AS, MLP and AWB reviewed the published work. All authors critically inputted into final design of the study, interpreted the data and co-wrote the manuscript. AS is the guarantor and attests on behalf of the authors that the manuscript is a true and transparent reflection of the study without omissions.

### **Role of the funding source**

The sponsor of the study had no role in the study design, data collection, analysis, interpretation, or writing of the final report. KD and AS had full access to all of the data and AS had final responsibility for manuscript submission.

### **Ethical approval**

1  
2  
3 Pseudo anonymised analysis of NJR data is considered as secondary use of clinical registry data,  
4 under HRA guidance this does not require formal ethical approval. However, all research projects are  
5 internally approved by the NJR. *The full NJR privacy notice can be found at*  
6 <http://www.njrcentre.org.uk/njrcentre/About-the-NJR/Privacy-Notice-GDPR>  
7  
8  
9

### 10 **Data sharing**

11  
12 Access to data is available from the National Joint Registry for England and Wales  
13  
14  
15  
16  
17  
18  
19  
20  
21  
22  
23  
24  
25  
26  
27  
28  
29  
30  
31  
32  
33  
34  
35  
36  
37  
38  
39  
40  
41  
42  
43  
44  
45  
46  
47  
48  
49  
50  
51  
52  
53  
54  
55  
56  
57  
58  
59  
60

For peer review only

## Figures

**Figure 1: Schematic representation of inferiority and non-inferiority**

**Figure 2: Difference in failure of implanted constructs compared to a contemporary reference at 3 years, using all stem-cup combinations with  $\geq 500$  procedures remaining at risk.**

**Figure 3: Difference in failure of implanted constructs compared to a contemporary reference at 5 years, using all stem-cup combinations with  $\geq 500$  procedures remaining at risk.**

**Figure 4: Difference in failure of implanted constructs compared to a contemporary reference at 7 years, using all stem-cup combinations with  $\geq 500$  procedures remaining at risk.**

**Figure 5: Difference in failure of implanted constructs compared to a contemporary reference at 10 years, using all stem-cup combinations with  $\geq 500$  procedures remaining at risk.**

## References

1. Warden J. Warning issued over hip implants. *BMJ* 1998;316(7132):650.
2. Smith AJ, Dieppe P, Howard PW, et al. Failure rates of metal-on-metal hip resurfacings: analysis of data from the National Joint Registry for England and Wales. *Lancet* 2012;380(9855):1759-66. doi: 10.1016/S0140-6736(12)60989-1
3. National Joint Registry for England W, Northern Ireland and the Isle of Man. 15th Annual report. <http://www.njrreports.org.uk/Portals/0/PDFdownloads/NJR%2015th%20Annual%20Report%202018.pdf>
4. Tucker K. Orthopaedic Data Evaluation Panel: ODEP. Northgate Public Services (UK) Ltd. 2017 [Available from: <http://www.odep.org.uk/ODEPProcess/ODEPStatement.aspx>.
5. Nederlandse Orthopaedische Vereniging. Classification Orthopaedic Implants: NOV Total Knee Prosthesis 2016-2017 [Available from: <https://www.orthopeden.org/downloads/146/classificatie-knie-2017.pdf>.
6. Prostheses and Devices Committee (PDC) and Prostheses List Advisory Committee (PLAC) Bulletins. Australian Government; Department of Health [Available from: <http://www.health.gov.au/internet/main/publishing.nsf/Content/health-privatehealth-prostheseslist.htm>.
7. NJR Reports Prosthesis document. National Joint Registry (NJR), 2016 [Available from: <http://www.njrreports.org.uk/Portals/0/PDFdownloads/NJR%2013th%20AR%20Prostheses%20used%20in%20joint%20replacements%202015.pdf>.
8. Sayers A, Crowther MJ, Judge A, et al. Determining the sample size required to establish whether a medical device is non-inferior to an external benchmark. *BMJ Open* 2017;7(8):e015397. doi: 10.1136/bmjopen-2016-015397 [published Online First: 2017/08/31]
9. Schumi J, Wittes JT. Through the looking glass: understanding non-inferiority. *Trials* 2011;12:106. doi: 10.1186/1745-6215-12-106
10. Tunes da Silva G, Logan BR, Klein JP. Methods for equivalence and noninferiority testing. *Biol Blood Marrow Transplant* 2009;15(1 Suppl):120-7. doi: 10.1016/j.bbmt.2008.10.004
11. Com-Nougue C, Rodary C, Patte C. How to establish equivalence when data are censored: a randomized trial of treatments for B non-Hodgkin lymphoma. *Stat Med* 1993;12(14):1353-64.
12. Deere K, Whitehouse MR, Porter M, et al. Assessing the non-inferiority of prosthesis used in total and unicondylar knee replacements using data from the National Joint Registry of England, Wales, Northern Ireland and the Isle of Man: A benchmarking study. *BMJ Open* 2019:xxxx. doi: xxx/bmjopen-2019-xxx
13. Bayliss LE, Culliford D, Monk AP, et al. The effect of patient age at intervention on risk of implant revision after total replacement of the hip or knee: a population-based cohort study. *Lancet* 2017;389(10077):1424-30. doi: 10.1016/S0140-6736(17)30059-4
14. Smith AJ, Dieppe P, Vernon K, et al. Failure rates of stemmed metal-on-metal hip replacements: analysis of data from the National Joint Registry of England and Wales. *Lancet* 2012;379(9822):1199-204. doi: 10.1016/S0140-6736(12)60353-5
15. NJR Data Quality Audit 2017 [Available from: <http://www.njrcentre.org.uk/njrcentre/NewsandEvents/DataQualityAudit-updateSeptember2017/tabid/1451/Default.aspx>.
16. Greenwood M. The natural duration of cancer. *Rep Public Health Med Subj (Lond)* 1926;33: 1-26
17. Donken R, de Melker HE, Rots NY, et al. Comparing vaccines: a systematic review of the use of the non-inferiority margin in vaccine trials. *Vaccine* 2015;33(12):1426-32. doi: 10.1016/j.vaccine.2015.01.072
18. Hunt LP WM, Beswick A, Porter ML, Howard P, Blom AW. Implications of the Introduction of New Technology: Comparative Survivorship Modelling of Metal-on-Metal Hip Replacement to Contemporary Alternatives in the National Joint Registry. *J Bone Joint Surg Am* 2018 Feb 7;100(3):189-196. doi: 10.2106/JBJS.17.00039

- 1  
2  
3 19. Sterne JA, White IR, Carlin JB, et al. Multiple imputation for missing data in epidemiological and  
4 clinical research: potential and pitfalls. *BMJ* 2009;338:b2393. doi: 10.1136/bmj.b2393  
5 [published Online First: 2009/07/01]  
6  
7  
8  
9  
10  
11  
12  
13  
14  
15  
16  
17  
18  
19  
20  
21  
22  
23  
24  
25  
26  
27  
28  
29  
30  
31  
32  
33  
34  
35  
36  
37  
38  
39  
40  
41  
42  
43  
44  
45  
46  
47  
48  
49  
50  
51  
52  
53  
54  
55  
56  
57  
58  
59  
60

For peer review only

1  
2  
3  
4  
5  
6  
7  
8  
9  
10  
11  
12  
13  
14  
15  
16  
17  
18  
19  
20  
21  
22  
23  
24  
25  
26  
27  
28  
29  
30  
31  
32  
33  
34  
35  
36  
37  
38  
39  
40  
41  
42  
43  
44  
45  
46  
47  
48  
49  
50  
51  
52  
53  
54  
55  
56  
57  
58  
59  
60

### Schematic representation of inferiority and non-inferiority

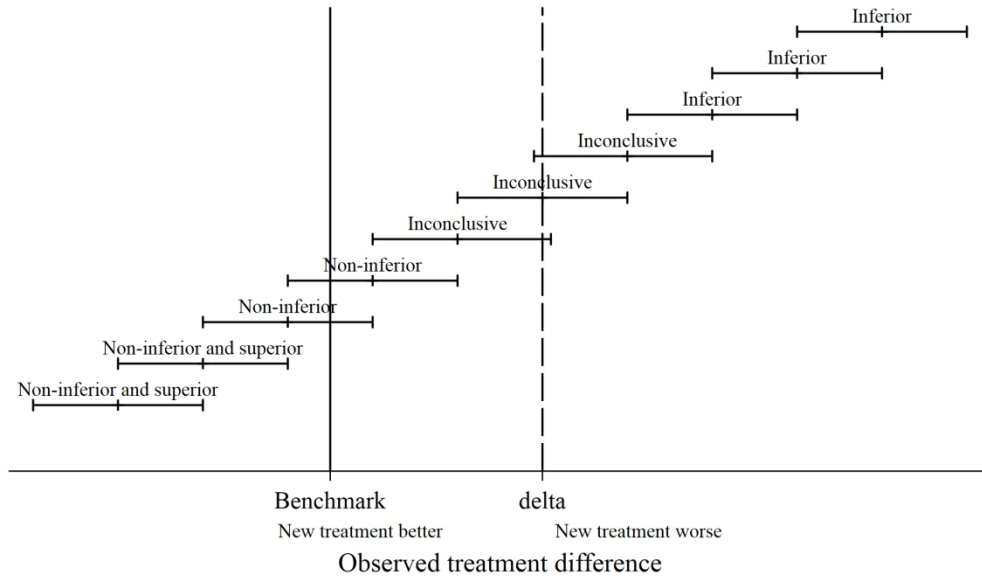

177x124mm (300 x 300 DPI)

All stem-cup combinations by bearing type at 3 years

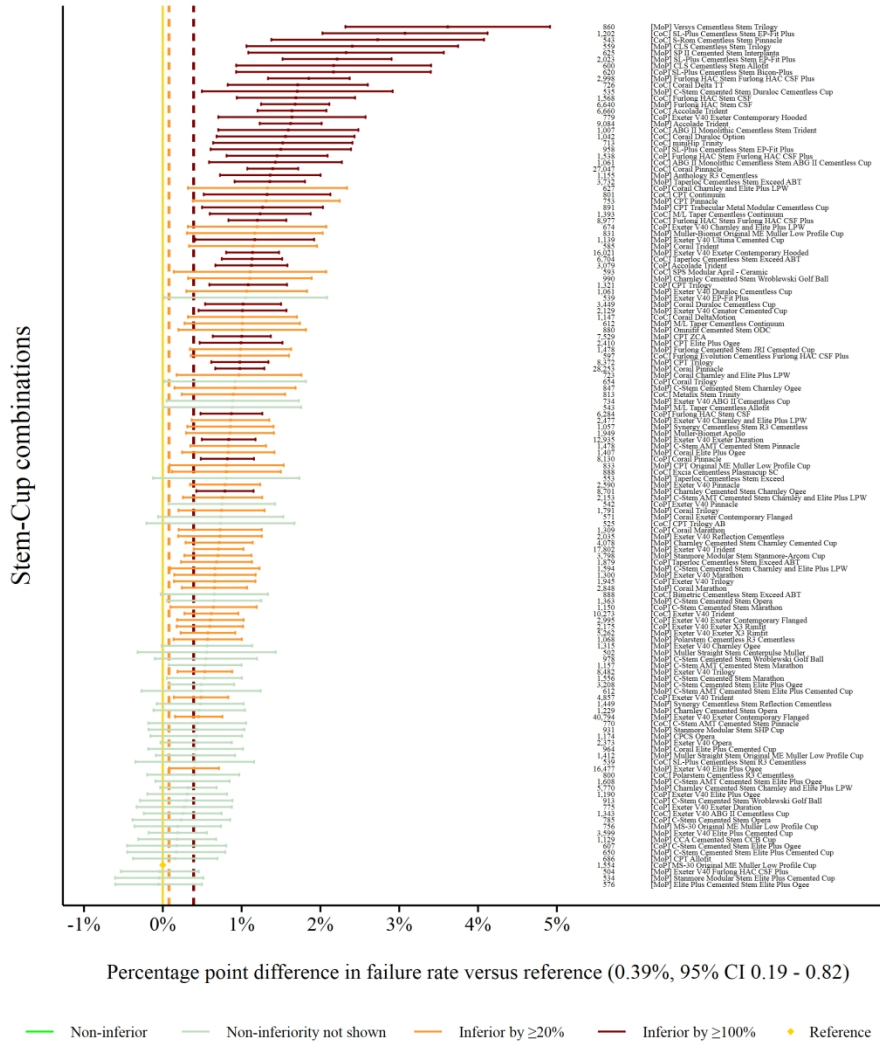

203x254mm (300 x 300 DPI)



### All stem-cup combinations by bearing type at 5 years

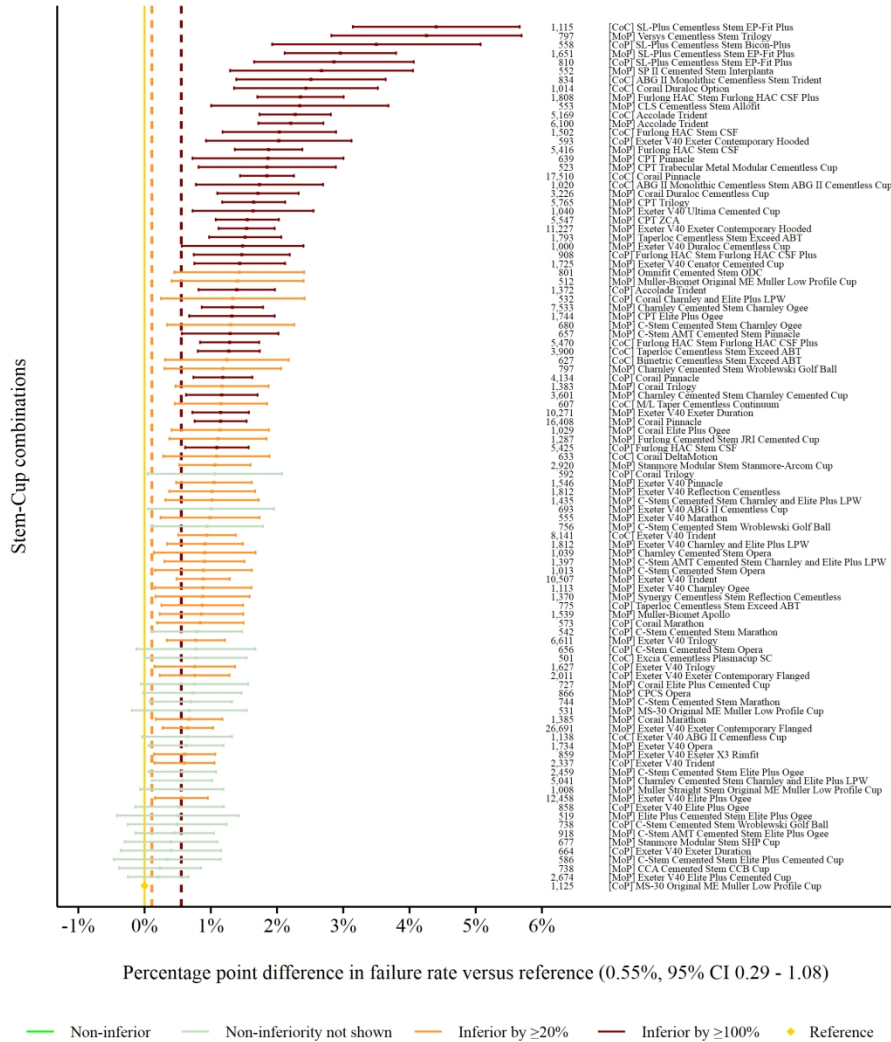

189x237mm (300 x 300 DPI)

### All stem-cup combinations by bearing type at 7 years



211x211mm (300 x 300 DPI)

1  
2  
3  
4  
5  
6  
7  
8  
9  
10  
11  
12  
13  
14  
15  
16  
17  
18  
19  
20  
21  
22  
23  
24  
25  
26  
27  
28  
29  
30  
31  
32  
33  
34  
35  
36  
37  
38  
39  
40  
41  
42  
43  
44  
45  
46  
47  
48  
49  
50  
51  
52  
53  
54  
55  
56  
57  
58  
59  
60

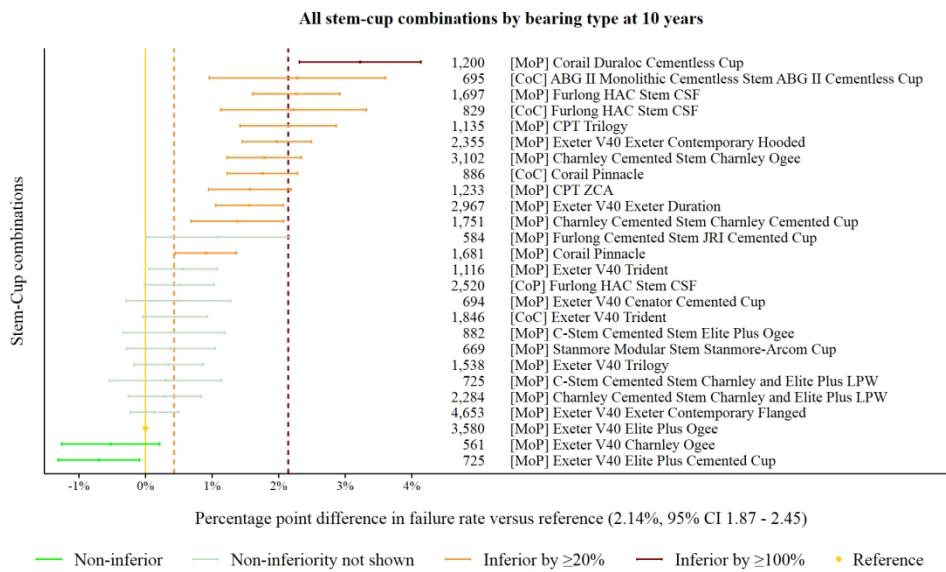

169x105mm (300 x 300 DPI)

Supplementary Figure 1: Flow diagram of showing derivation of procedures used in analyses

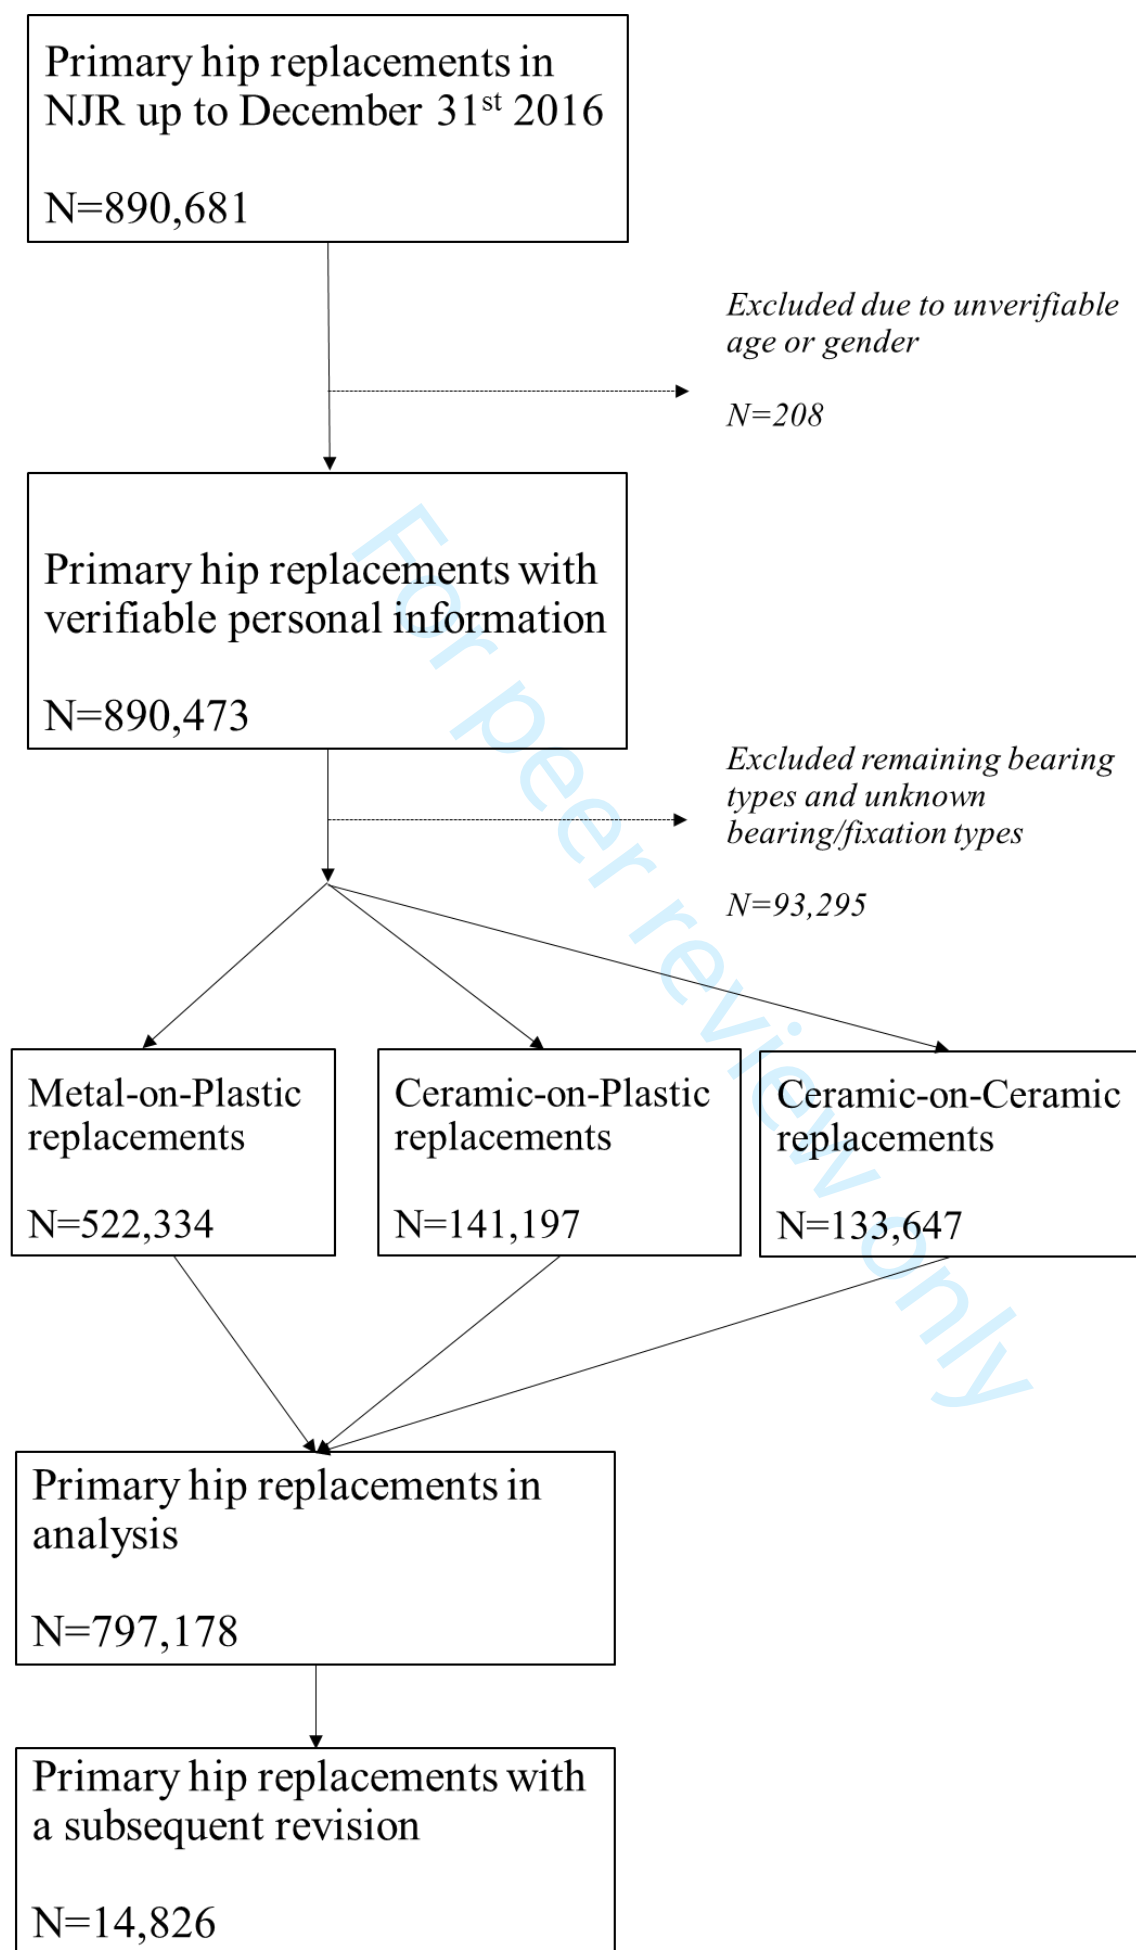

Supplementary Figure 2a: Difference in failure of implanted constructs compared to a contemporary reference at 3 years in men, using all stem-cup combinations with ≥500 procedures remaining at risk

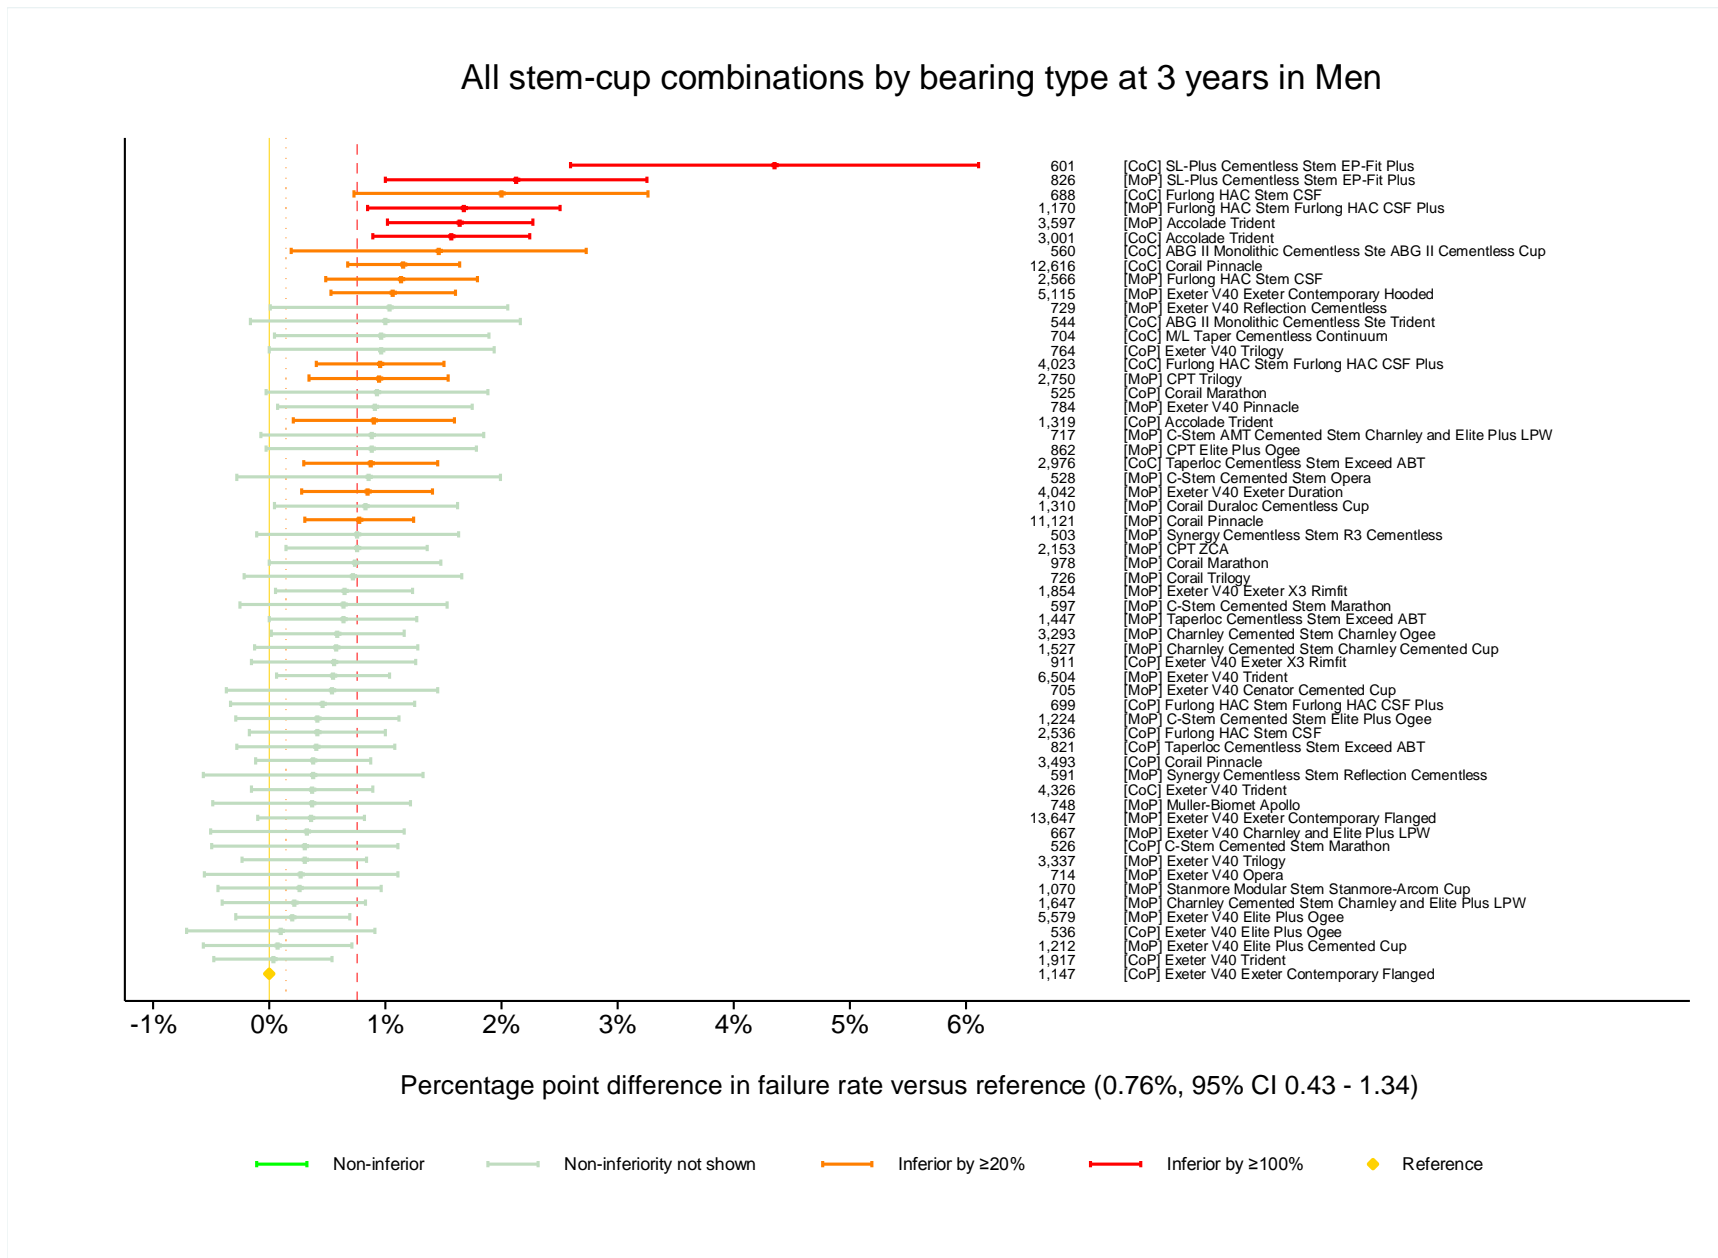

Supplementary Figure 2b: Difference in failure of implanted constructs compared to a contemporary reference at 3 years in men less than 55 years, using all stem-cup combinations with  $\geq 500$  procedures remaining at risk



Supplementary Figure 2c: Difference in failure of implanted constructs compared to a contemporary reference at 3 years in men between 55 and 75 years, using all stem-cup combinations with ≥500 procedures remaining at risk

1  
2  
3  
4  
5  
6  
7  
8  
9  
10  
11  
12  
13  
14  
15  
16  
17  
18  
19  
20  
21  
22  
23  
24  
25  
26  
27  
28  
29  
30  
31  
32  
33  
34  
35  
36  
37  
38  
39  
40  
41  
42  
43  
44  
45  
46

All stem-cup combinations by bearing type at 3 years in Men 55-75 years

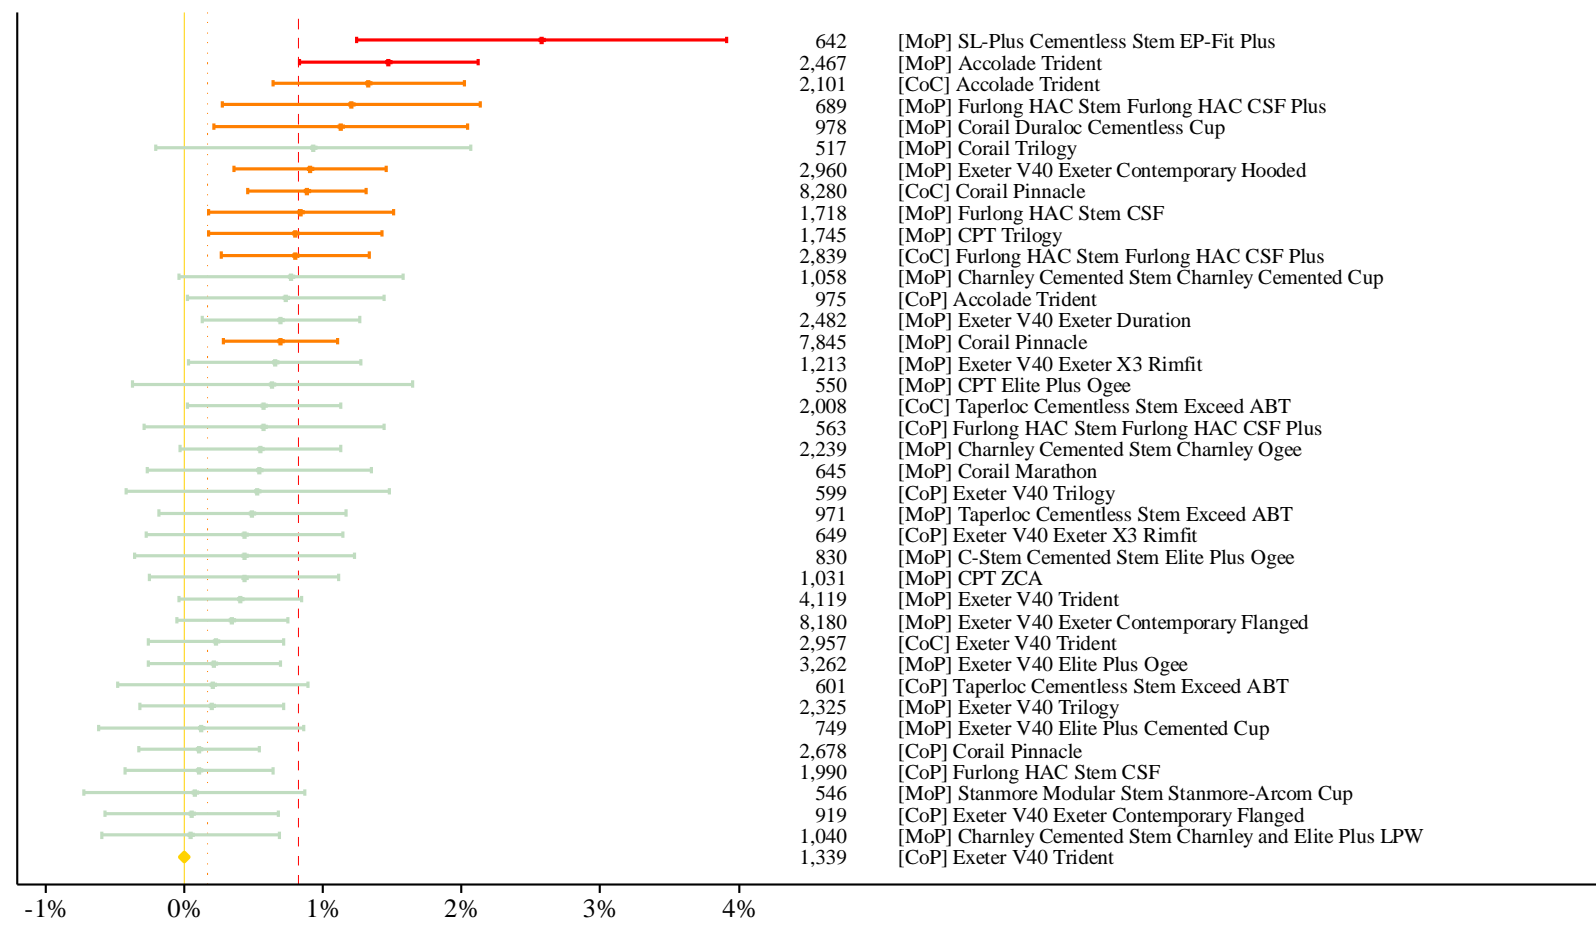

Percentage point difference in failure rate versus reference (0.83%, 95% CI 0.55 - 1.26)

Legend: Non-inferior (green), Non-inferiority not shown (light green), Inferior by ≥20% (orange), Inferior by ≥100% (red), Reference (yellow diamond)

Supplementary Figure 2d: Difference in failure of implanted constructs compared to a contemporary reference at 3 years in men greater than 75 years, using all stem-cup combinations with  $\geq 500$  procedures remaining at risk

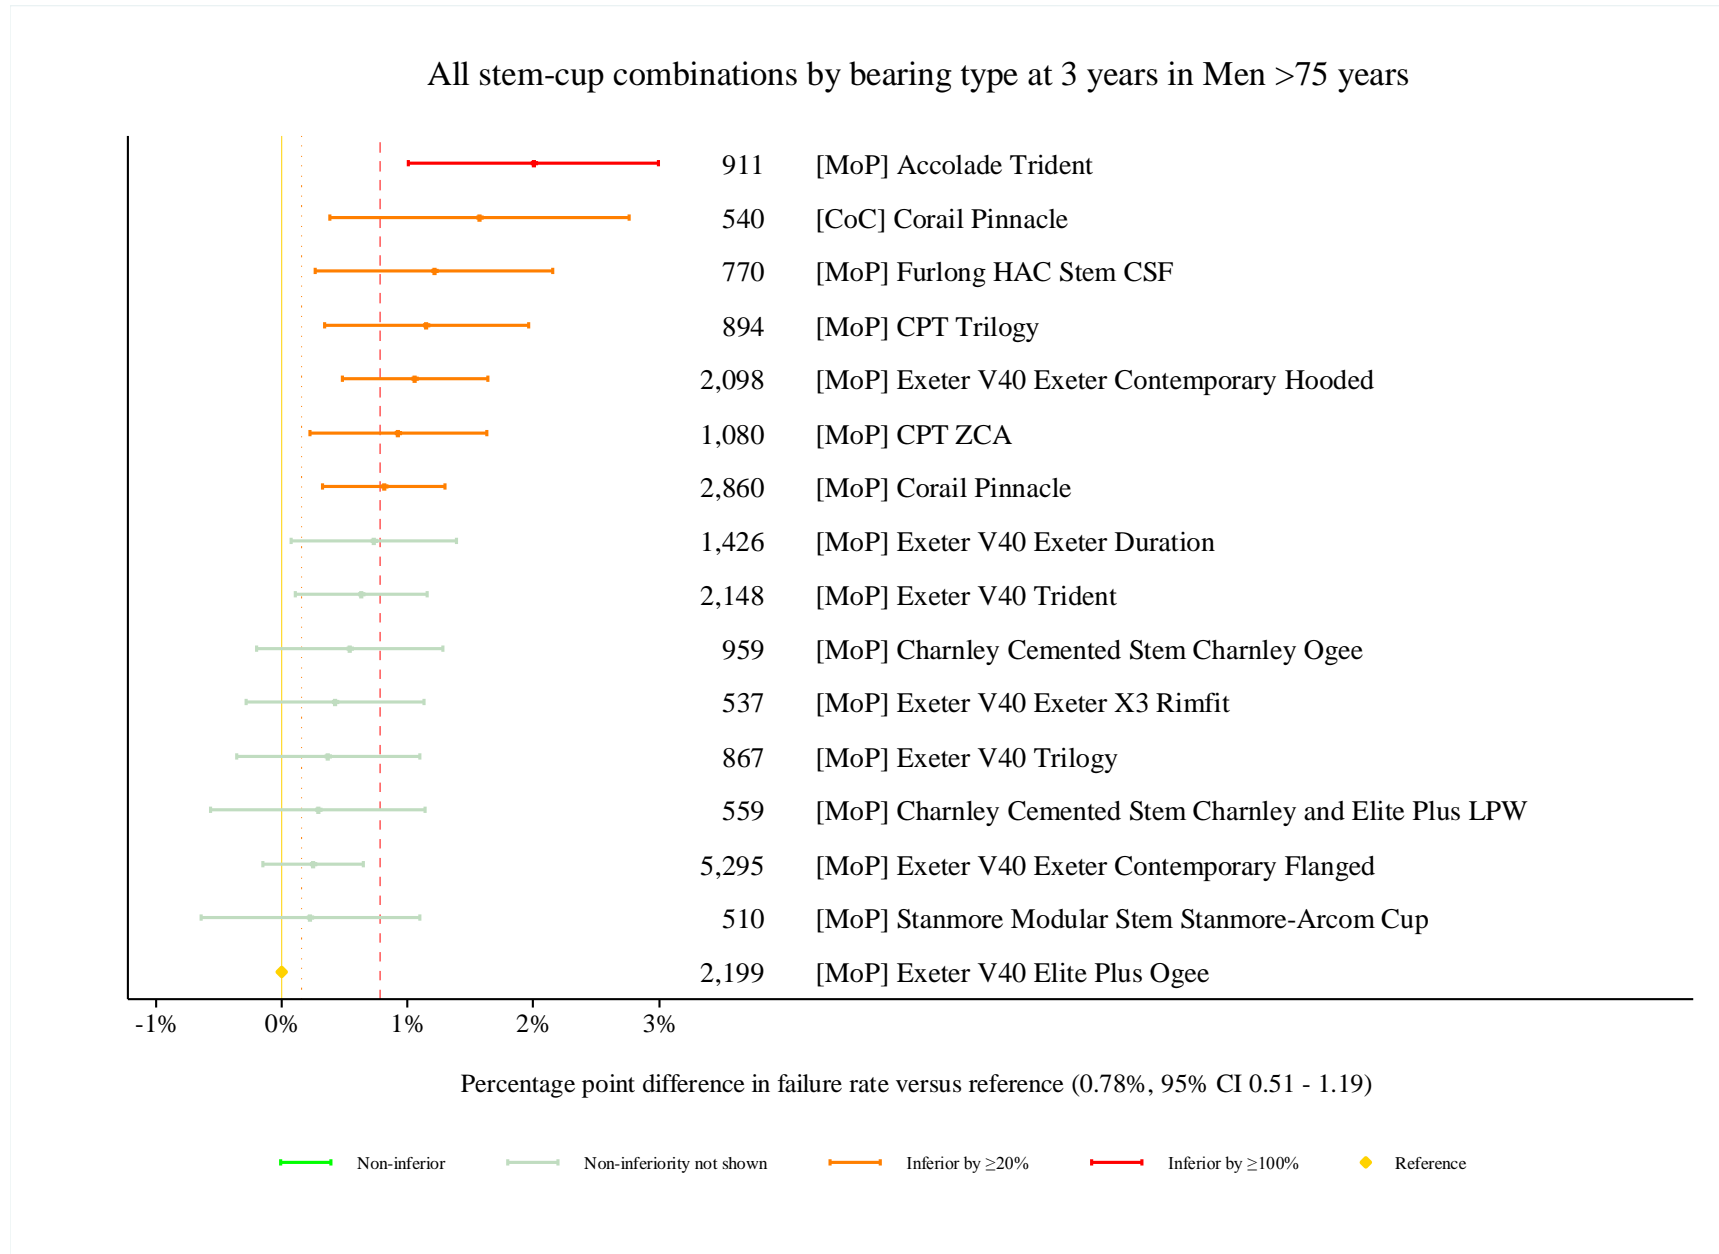



Supplementary Figure 3a: Difference in failure of implanted constructs compared to a contemporary reference at 5 years in men, using all stem-cup combinations with ≥500 procedures remaining at risk

All stem-cup combinations by bearing type at 5 years in Men

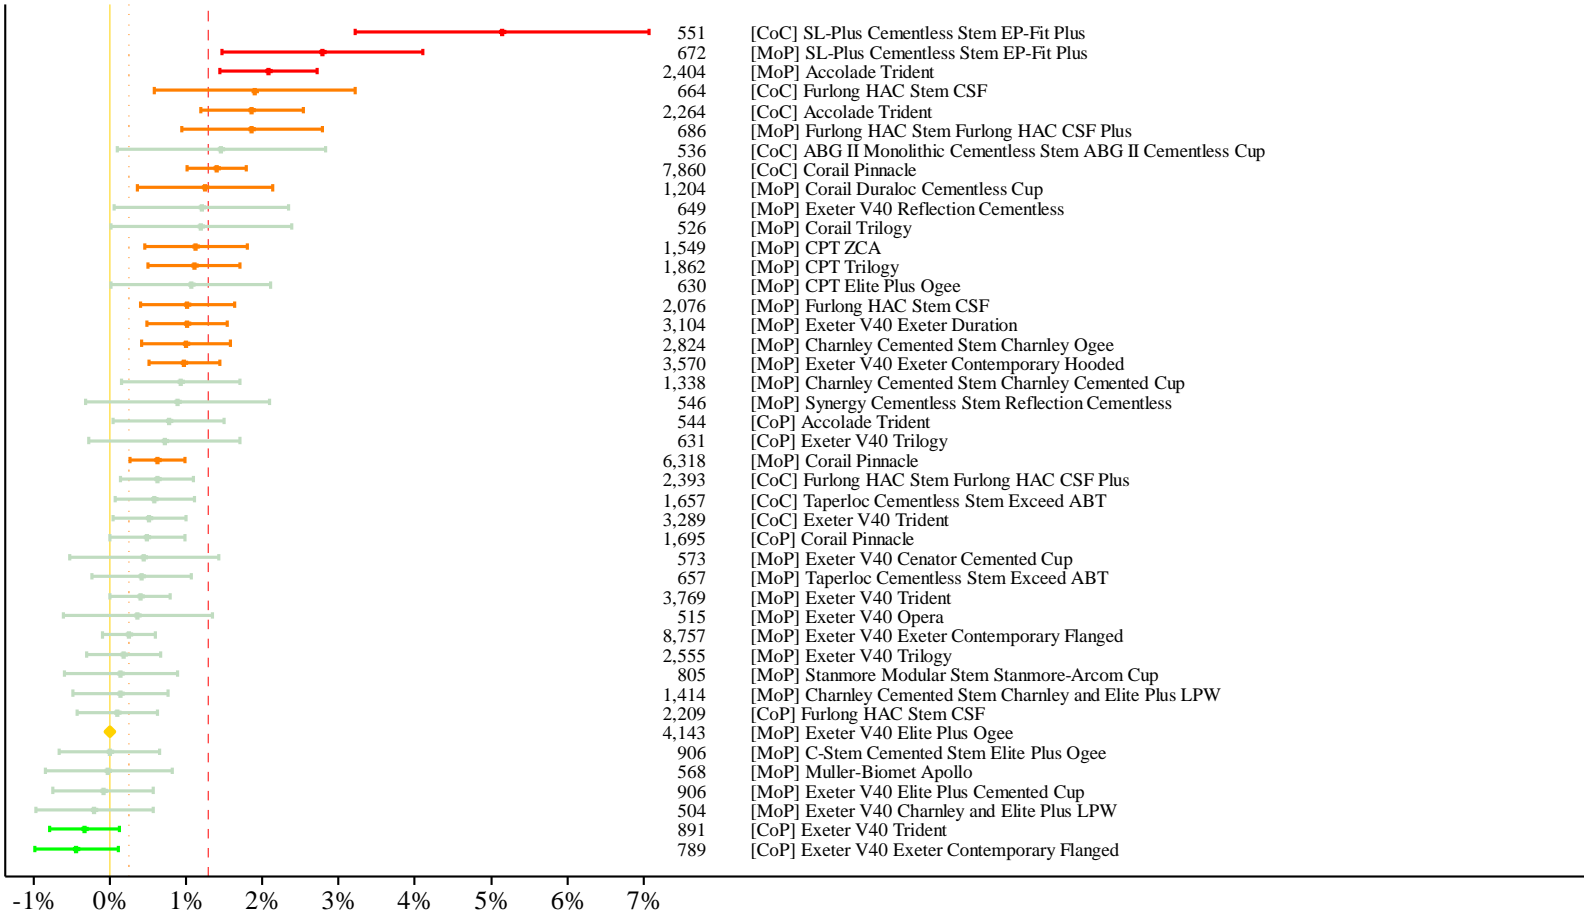

Percentage point difference in failure rate versus reference (1.29%, 95% CI 1.03 - 1.60)

Legend: Non-inferior (green), Non-inferiority not shown (light green), Inferior by ≥20% (orange), Inferior by ≥100% (red), Reference (yellow diamond)

Supplementary Figure 3b: Difference in failure of implanted constructs compared to a contemporary reference at 5 years in men less than 55 years, using all stem-cup combinations with  $\geq 500$  procedures remaining at risk

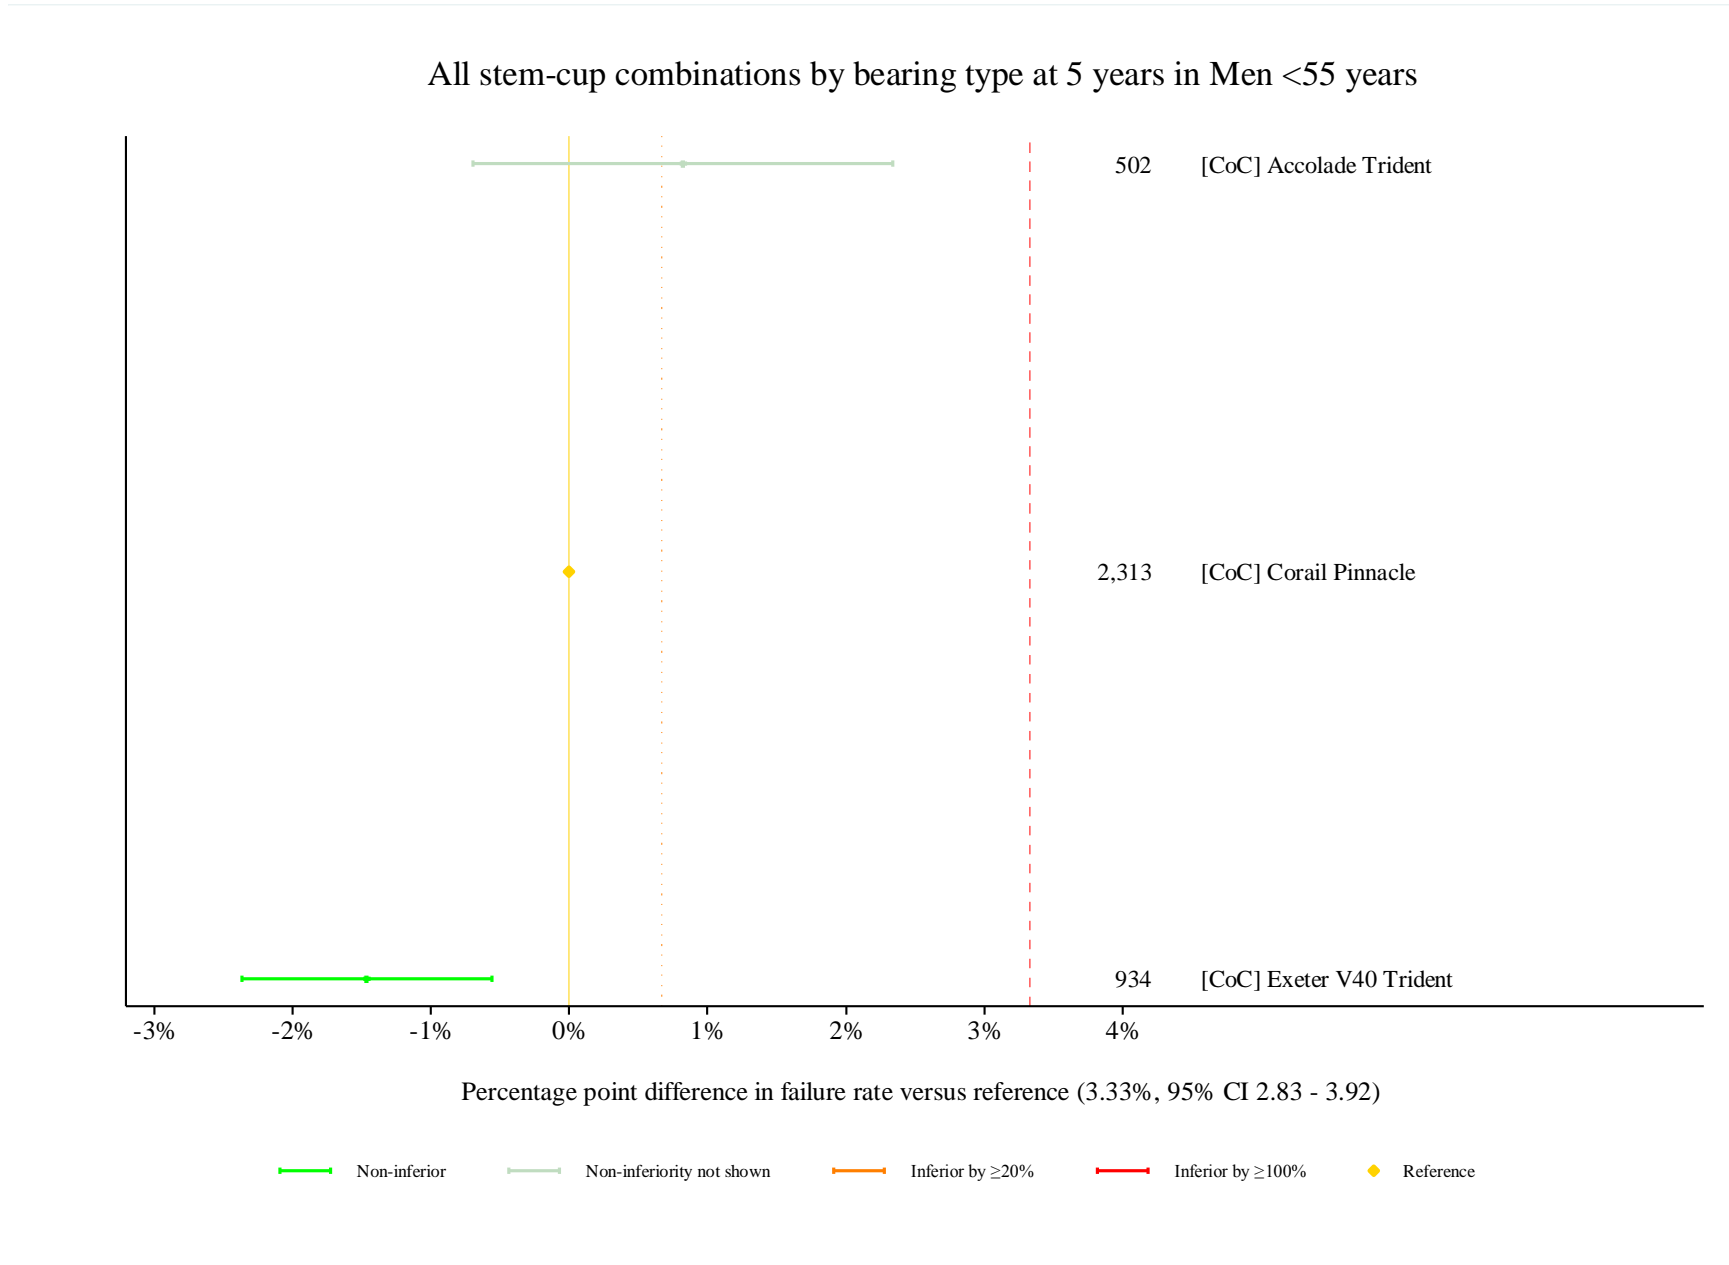

Supplementary Figure 3c: Difference in failure of implanted constructs compared to a contemporary reference at 5 years in men between 55 and 75 years, using all stem-cup combinations with ≥500 procedures remaining at risk

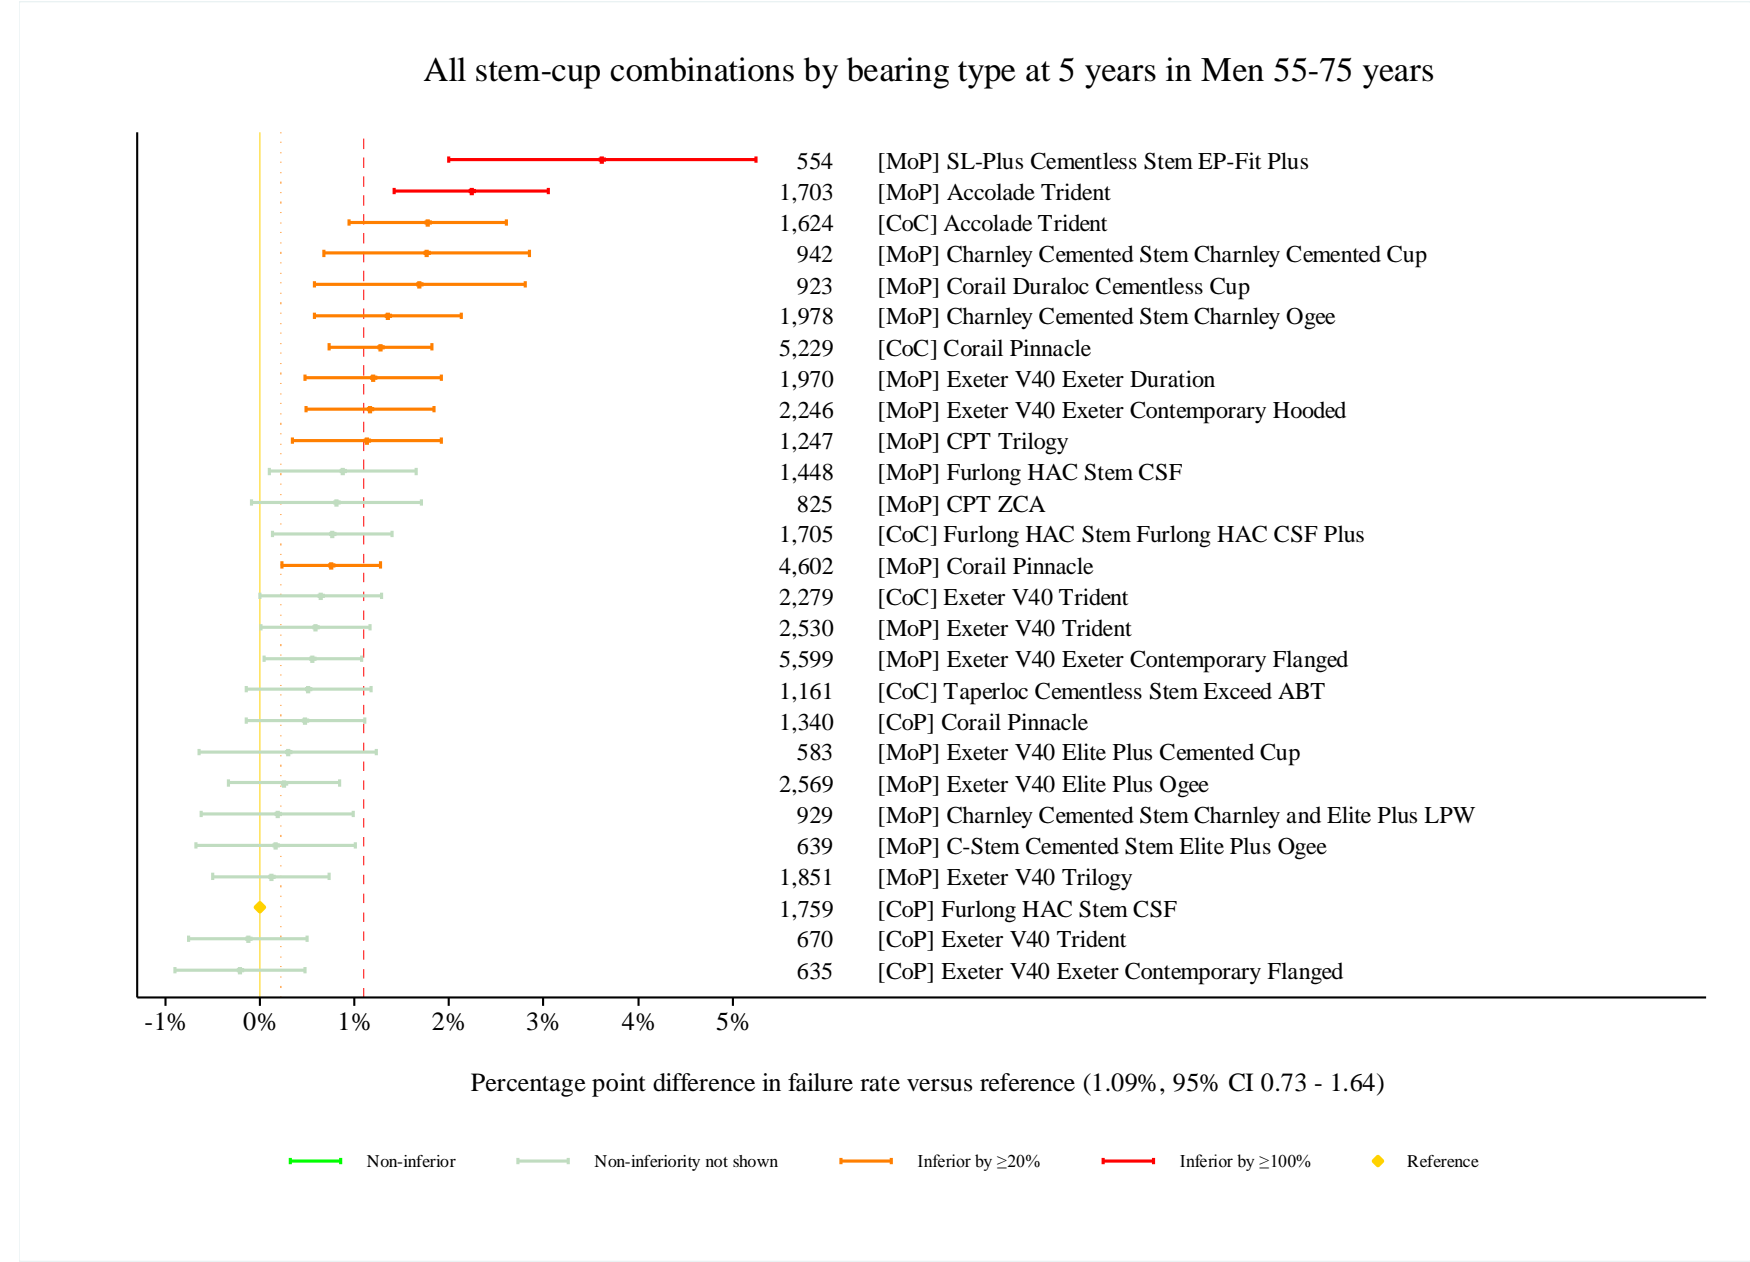

Supplementary Figure 3d: Difference in failure of implanted constructs compared to a contemporary reference at 5 years in men greater than 75 years, using all stem-cup combinations with  $\geq 500$  procedures remaining at risk



Supplementary Figure 4a: Difference in failure of implanted constructs compared to a contemporary reference at 7 years in men, using all stem-cup combinations with ≥500 procedures remaining at risk

All stem-cup combinations by bearing type at 7 years in Men

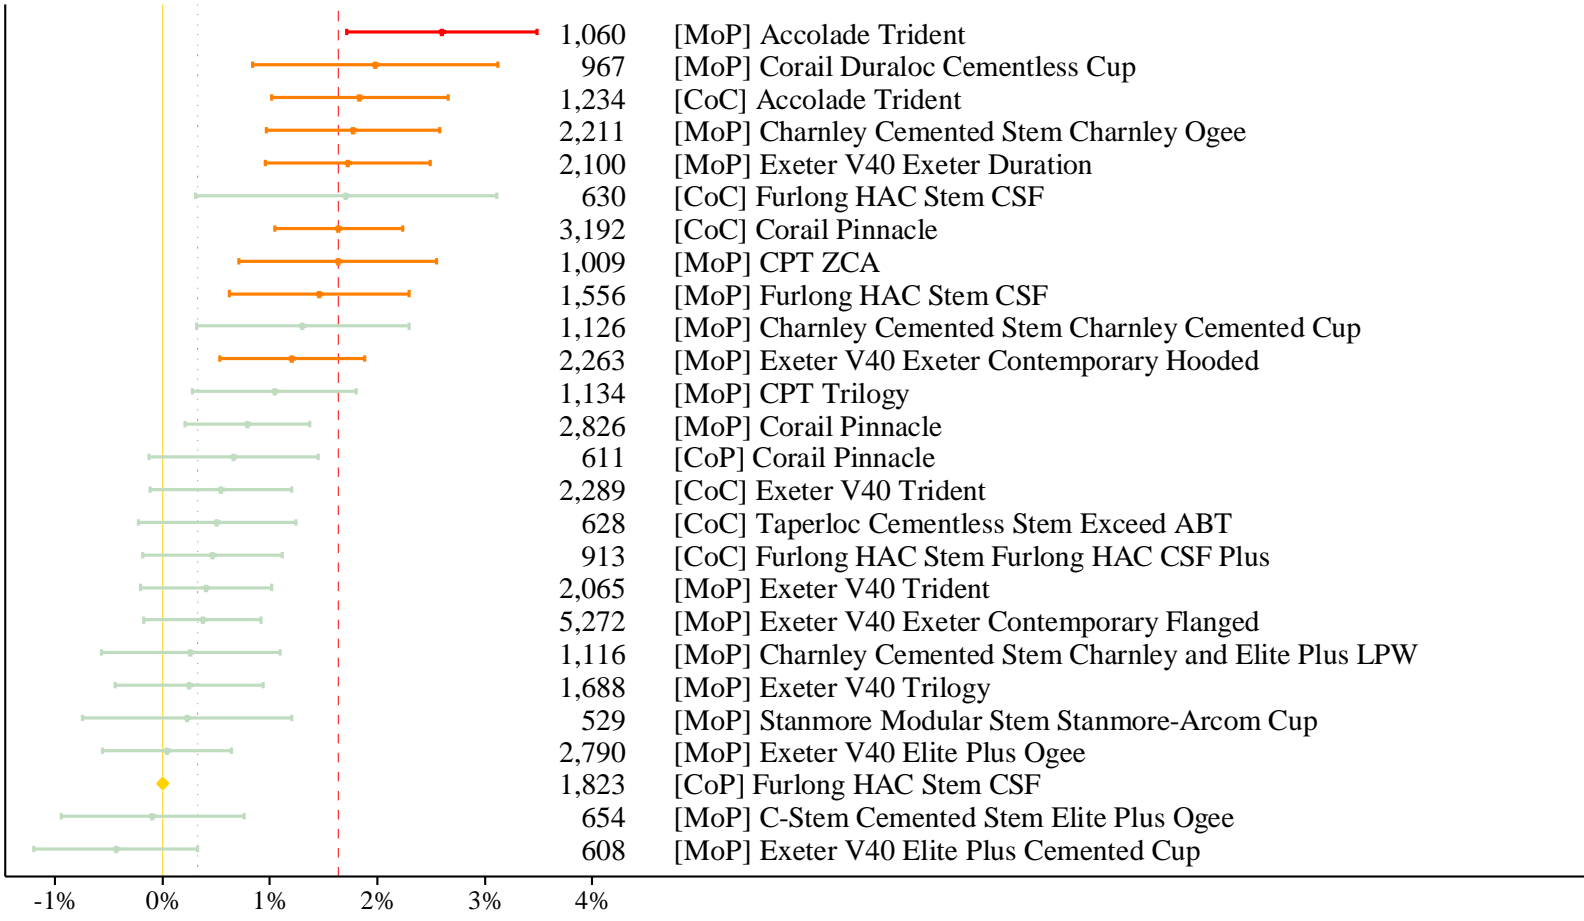

Percentage point difference in failure rate versus reference (1.64%, 95% CI 1.21 - 2.20)

Legend: Non-inferior (green), Non-inferiority not shown (light green), Inferior by ≥20% (orange), Inferior by ≥100% (red), Reference (yellow diamond)

Supplementary Figure 4b: Difference in failure of implanted constructs compared to a contemporary reference at 7 years in men between 55 and 75 years, using all stem-cup combinations with  $\geq 500$  procedures remaining at risk

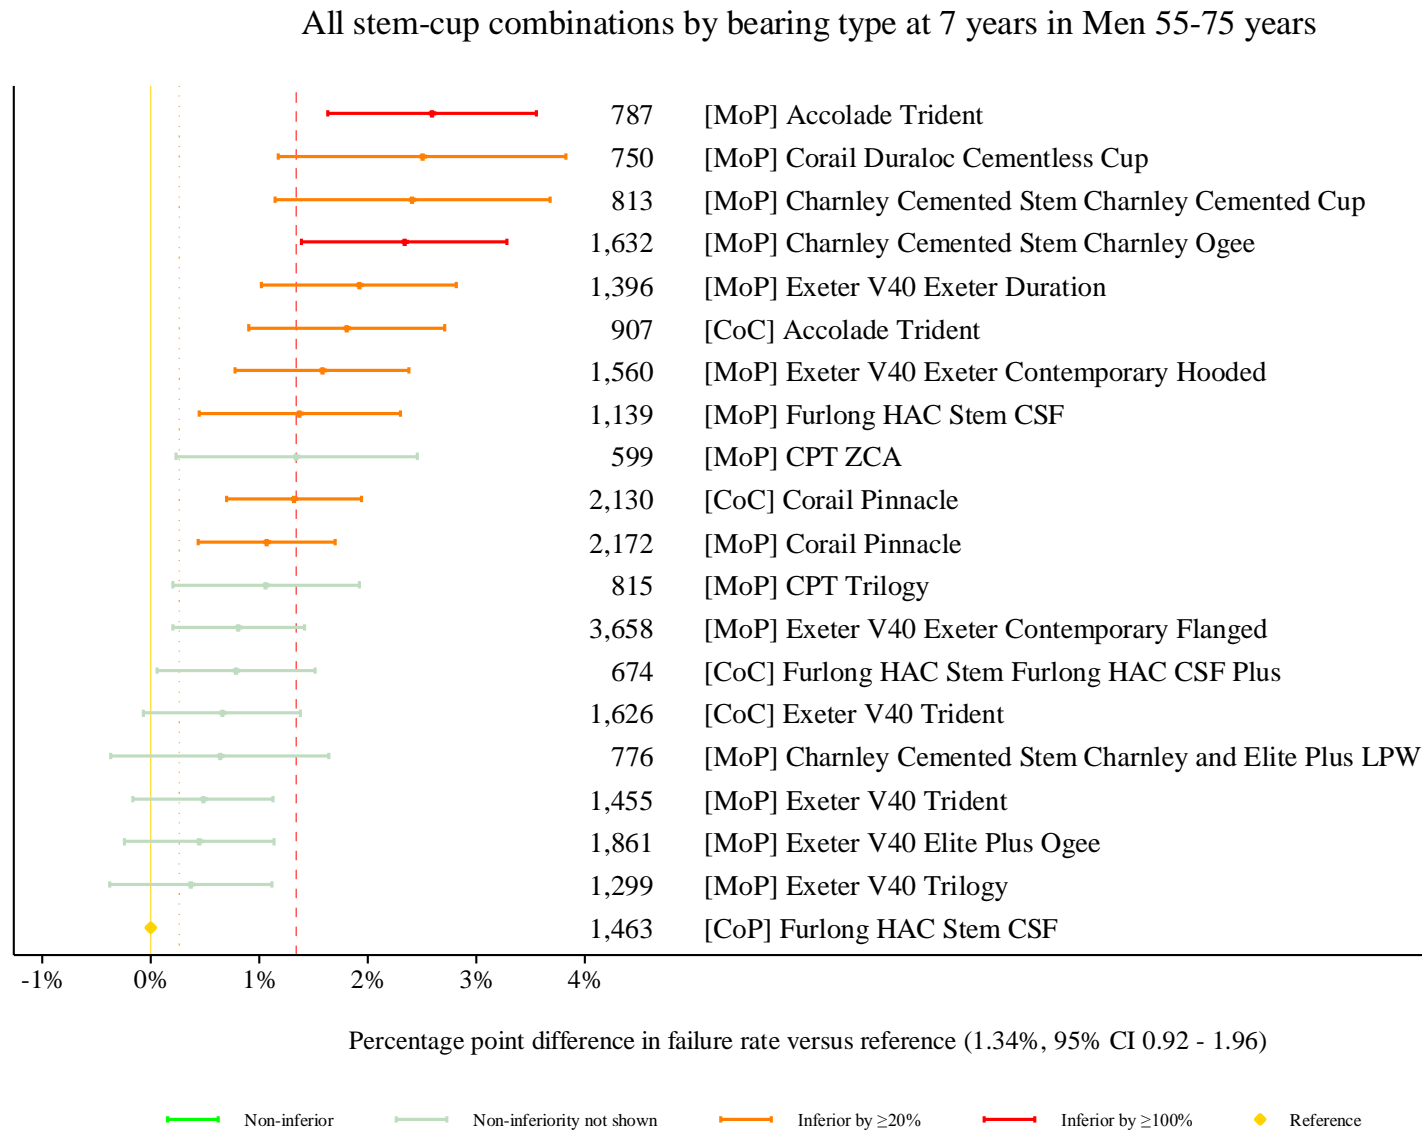

Supplementary Figure 4c: Difference in failure of implanted constructs compared to a contemporary reference at 7 years in men greater than 75 years, using all stem-cup combinations with ≥500 procedures remaining at risk

1  
2  
3  
4  
5  
6  
7  
8  
9  
10  
11  
12  
13  
14  
15  
16  
17  
18  
19  
20  
21  
22  
23  
24  
25  
26  
27  
28  
29  
30  
31  
32  
33  
34  
35  
36  
37  
38  
39  
40  
41  
42  
43  
44  
45  
46

All stem-cup combinations by bearing type at 7 years in Men >75 years



Supplementary Figure 5a: Difference in failure of implanted constructs compared to a contemporary reference at 10 years, using all stem-cup combinations with  $\geq 500$  procedures remaining at risk





Supplementary Figure 5b: Difference in failure of implanted constructs compared to a contemporary reference at 10 years in men between 55 and 75 years, using all stem-cup combinations with ≥500 procedures remaining at risk

1  
2  
3  
4  
5  
6  
7  
8  
9  
10  
11  
12  
13  
14  
15  
16  
17  
18  
19  
20  
21  
22  
23  
24  
25  
26  
27  
28  
29  
30  
31  
32  
33  
34  
35  
36  
37  
38  
39  
40  
41  
42  
43  
44  
45  
46

All stem-cup combinations by bearing type at 10 years in Men 55-75 years

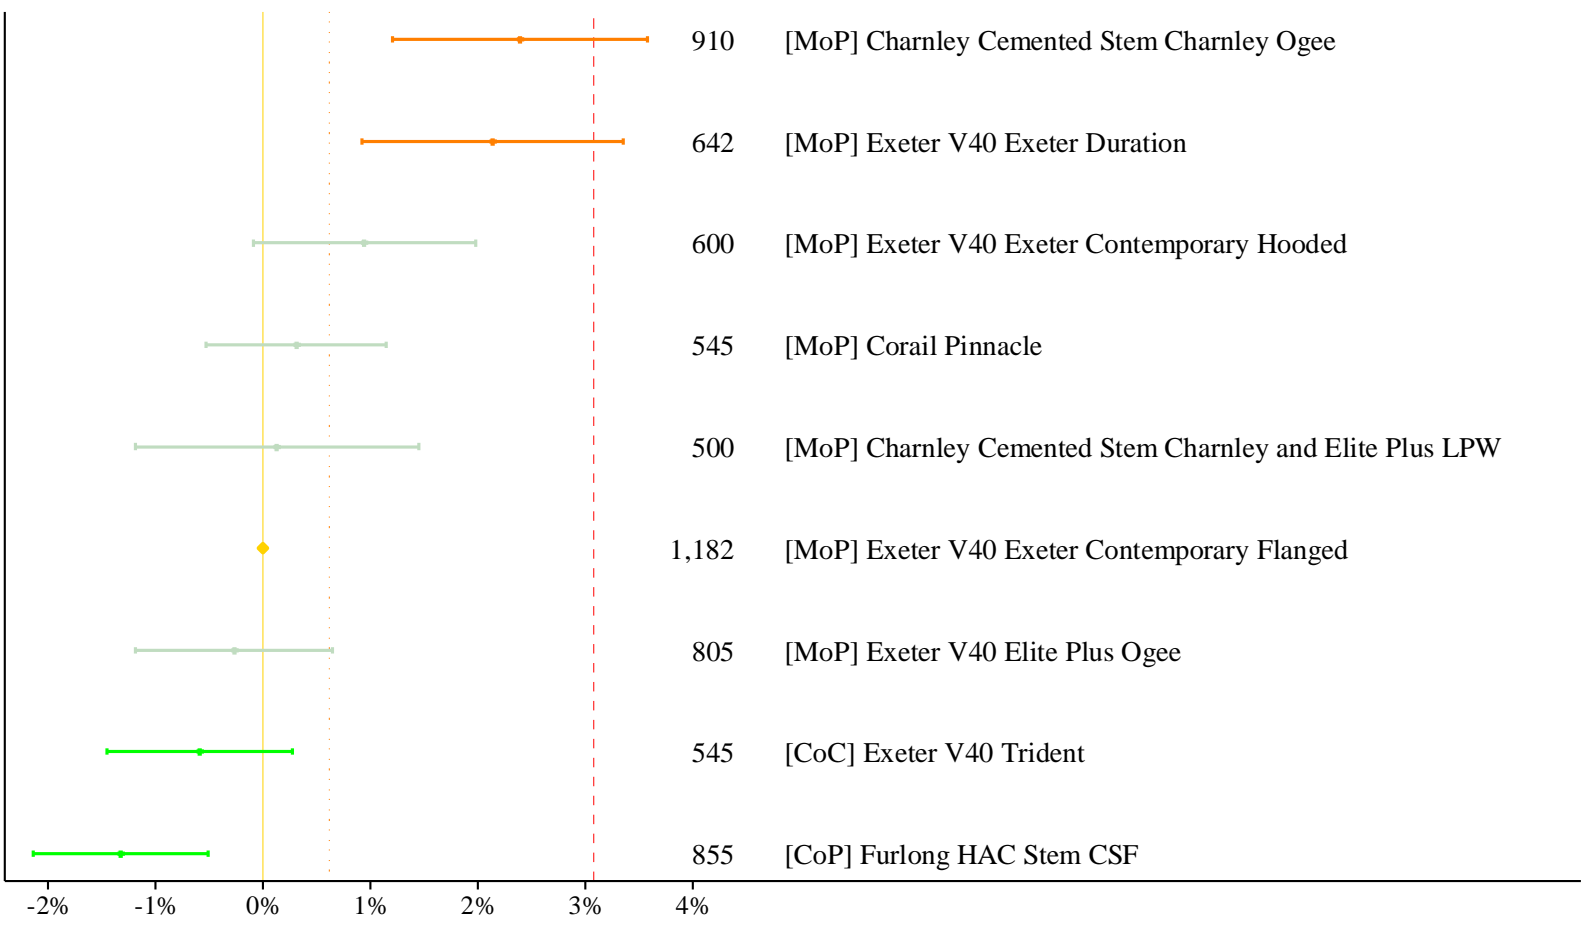

Percentage point difference in failure rate versus reference (3.08%, 95% CI 2.59 - 3.65)

Legend: Non-inferior (green line), Non-inferiority not shown (light green line), Inferior by ≥20% (orange line), Inferior by ≥100% (red line), Reference (yellow diamond)

Supplementary Figure 6a: Difference in failure of implanted constructs compared to a contemporary reference at 3 years in women, using all stem-cup combinations with ≥500 procedures remaining at risk

All stem-cup combinations by bearing type at 3 years in Women



Percentage point difference in failure rate versus reference (0.41%, 95% CI 0.17 - 0.98)

— Non-inferior    
 — Non-inferiority not shown    
 — Inferior by ≥20%    
 — Inferior by ≥100%    
 ◆ Reference

Supplementary Figure 6b: Difference in failure of implanted constructs compared to a contemporary reference at 3 years in women less than 55 years, using all stem-cup combinations with ≥500 procedures remaining at risk



Supplementary Figure 6c: Difference in failure of implanted constructs compared to a contemporary reference at 3 years in women between 55 and 75 years, using all stem-cup combinations with  $\geq 500$  procedures remaining at risk



Supplementary Figure 6d: Difference in failure of implanted constructs compared to a contemporary reference at 3 years in women greater than 75 years, using all stem-cup combinations with ≥500 procedures remaining at risk

1  
2  
3  
4  
5  
6  
7  
8  
9  
10  
11  
12  
13  
14  
15  
16  
17  
18  
19  
20  
21  
22  
23  
24  
25  
26  
27  
28  
29  
30  
31  
32  
33  
34  
35  
36  
37  
38  
39  
40  
41  
42  
43  
44  
45  
46

All stem-cup combinations by bearing type at 3 years in Men >75 years

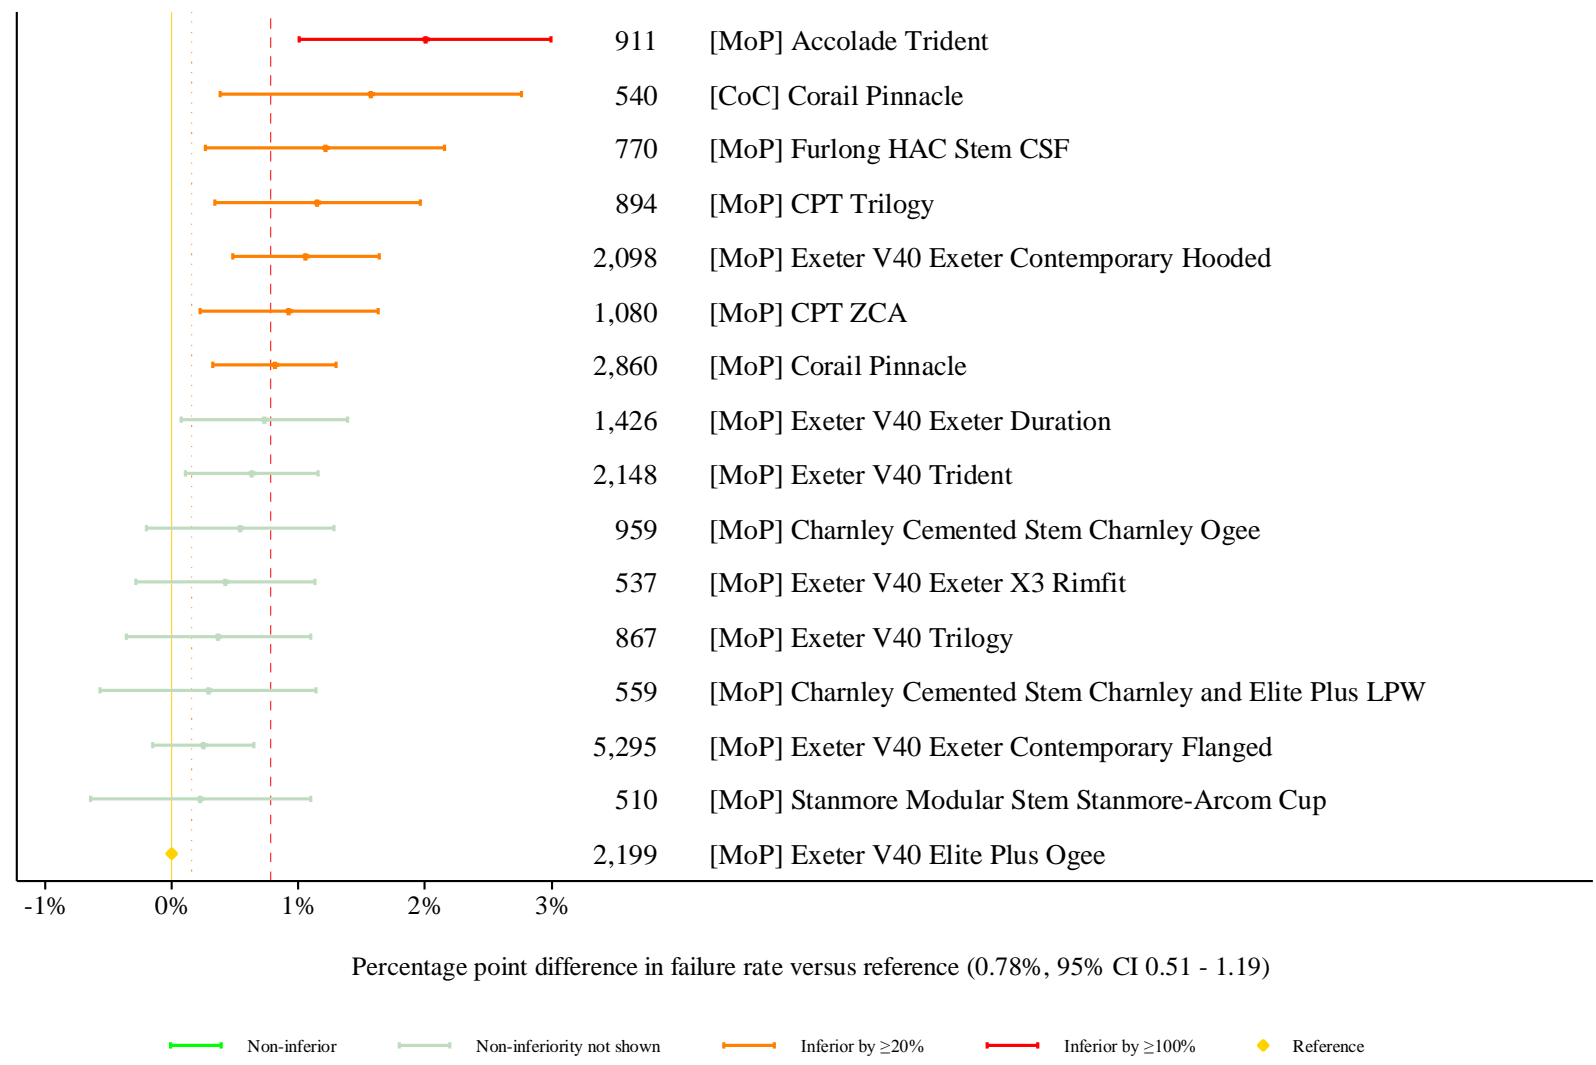

Supplementary Figure 7a: Difference in failure of implanted constructs compared to a contemporary reference at 5 years in women, using all stem-cup combinations with ≥500 procedures remaining at risk

All stem-cup combinations by bearing type at 5 years in Women



|        |                                                               |
|--------|---------------------------------------------------------------|
| 565    | [CoC] SL-Plus Cementless Stem EP-Fit Plus                     |
| 980    | [MoP] SL-Plus Cementless Stem EP-Fit Plus                     |
| 1,122  | [MoP] Furlong HAC Stem Furlong HAC CSF Plus                   |
| 566    | [CoC] Corail Duraloc Option                                   |
| 2,906  | [CoC] Accolade Trident                                        |
| 508    | [CoP] Furlong HAC Stem Furlong HAC CSF Plus                   |
| 3,340  | [MoP] Furlong HAC Stem CSF                                    |
| 3,698  | [MoP] Accolade Trident                                        |
| 1,136  | [MoP] Taperloc Cementless Stem Exceed ABT                     |
| 559    | [MoP] Omnifit Cemented Stem ODC                               |
| 9,650  | [CoC] Corail Pinnacle                                         |
| 1,153  | [MoP] Exeter V40 Cenator Cemented Cup                         |
| 839    | [CoC] Furlong HAC Stem CSF                                    |
| 2,023  | [MoP] Corail Duraloc Cementless Cup                           |
| 3,903  | [MoP] CPT Trilogy                                             |
| 7,664  | [MoP] Exeter V40 Exeter Contemporary Hooded                   |
| 3,998  | [MoP] CPT ZCA                                                 |
| 720    | [MoP] Exeter V40 Ultima Cemented Cup                          |
| 828    | [CoP] Accolade Trident                                        |
| 3,217  | [CoP] Furlong HAC Stem CSF                                    |
| 671    | [MoP] Exeter V40 Duraloc Cementless Cup                       |
| 1,007  | [MoP] C-Stem Cemented Stem Charnley and Elite Plus LPW        |
| 2,243  | [CoC] Taperloc Cementless Stem Exceed ABT                     |
| 3,077  | [CoC] Furlong HAC Stem Furlong HAC CSF Plus                   |
| 892    | [MoP] Furlong Cemented Stem JRI Cemented Cup                  |
| 2,442  | [CoP] Corail Pinnacle                                         |
| 2,115  | [MoP] Stanmore Modular Stem Stanmore-Arcom Cup                |
| 678    | [MoP] Corail Elite Plus Ogee                                  |
| 4,710  | [MoP] Charnley Cemented Stem Charnley Ogee                    |
| 586    | [MoP] CPCS Opera                                              |
| 1,309  | [MoP] Exeter V40 Charnley and Elite Plus LPW                  |
| 1,115  | [MoP] CPT Elite Plus Ogee                                     |
| 1,225  | [CoP] Exeter V40 Exeter Contemporary Flanged                  |
| 10,090 | [MoP] Corail Pinnacle                                         |
| 972    | [MoP] Muller-Biomet Apollo                                    |
| 7,168  | [MoP] Exeter V40 Exeter Duration                              |
| 2,265  | [MoP] Charnley Cemented Stem Charnley Cemented Cup            |
| 900    | [MoP] Exeter V40 Charnley Ogee                                |
| 697    | [MoP] Charnley Cemented Stem Opera                            |
| 6,743  | [MoP] Exeter V40 Trident                                      |
| 954    | [MoP] C-Stem AMT Cemented Stem Charnley and Elite Plus LPW    |
| 1,446  | [CoP] Exeter V40 Trident                                      |
| 4,852  | [CoC] Exeter V40 Trident                                      |
| 718    | [MoP] Muller Straight Stem Original ME Muller Low Profile Cup |
| 1,075  | [MoP] Exeter V40 Pinnacle                                     |
| 4,060  | [MoP] Exeter V40 Trilogy                                      |
| 859    | [MoP] Corail Trilogy                                          |
| 666    | [MoP] C-Stem AMT Cemented Stem Elite Plus Ogee                |
| 760    | [CoC] Exeter V40 ABG II Cementless Cup                        |
| 1,164  | [MoP] Exeter V40 Reflection Cementless                        |
| 17,934 | [MoP] Exeter V40 Exeter Contemporary Flanged                  |
| 1,554  | [MoP] C-Stem Cemented Stem Elite Plus Ogee                    |
| 8,315  | [MoP] Exeter V40 Elite Plus Ogee                              |
| 3,628  | [MoP] Charnley Cemented Stem Charnley and Elite Plus LPW      |
| 1,221  | [MoP] Exeter V40 Opera                                        |
| 626    | [MoP] C-Stem Cemented Stem Opera                              |
| 921    | [MoP] Corail Marathon                                         |
| 550    | [MoP] Exeter V40 Exeter X3 Rimfit                             |
| 535    | [MoP] CCA Cemented Stem CCB Cup                               |
| 825    | [MoP] Synergy Cementless Stem Reflection Cementless           |
| 997    | [CoP] Exeter V40 Trilogy                                      |
| 796    | [CoP] MS-30 Original ME Muller Low Profile Cup                |
| 1,769  | [MoP] Exeter V40 Elite Plus Cemented Cup                      |

Supplementary Figure 7b: Difference in failure of implanted constructs compared to a contemporary reference at 5 years in women less than 55 years, using all stem-cup combinations with ≥500 procedures remaining at risk

1  
2  
3  
4  
5  
6  
7  
8  
9  
10  
11  
12  
13  
14  
15  
16  
17  
18  
19  
20  
21  
22  
23  
24  
25  
26  
27  
28  
29  
30  
31  
32  
33  
34  
35  
36  
37  
38  
39  
40  
41  
42  
43  
44  
45  
46

All stem-cup combinations by bearing type at 5 years in Women <55 years

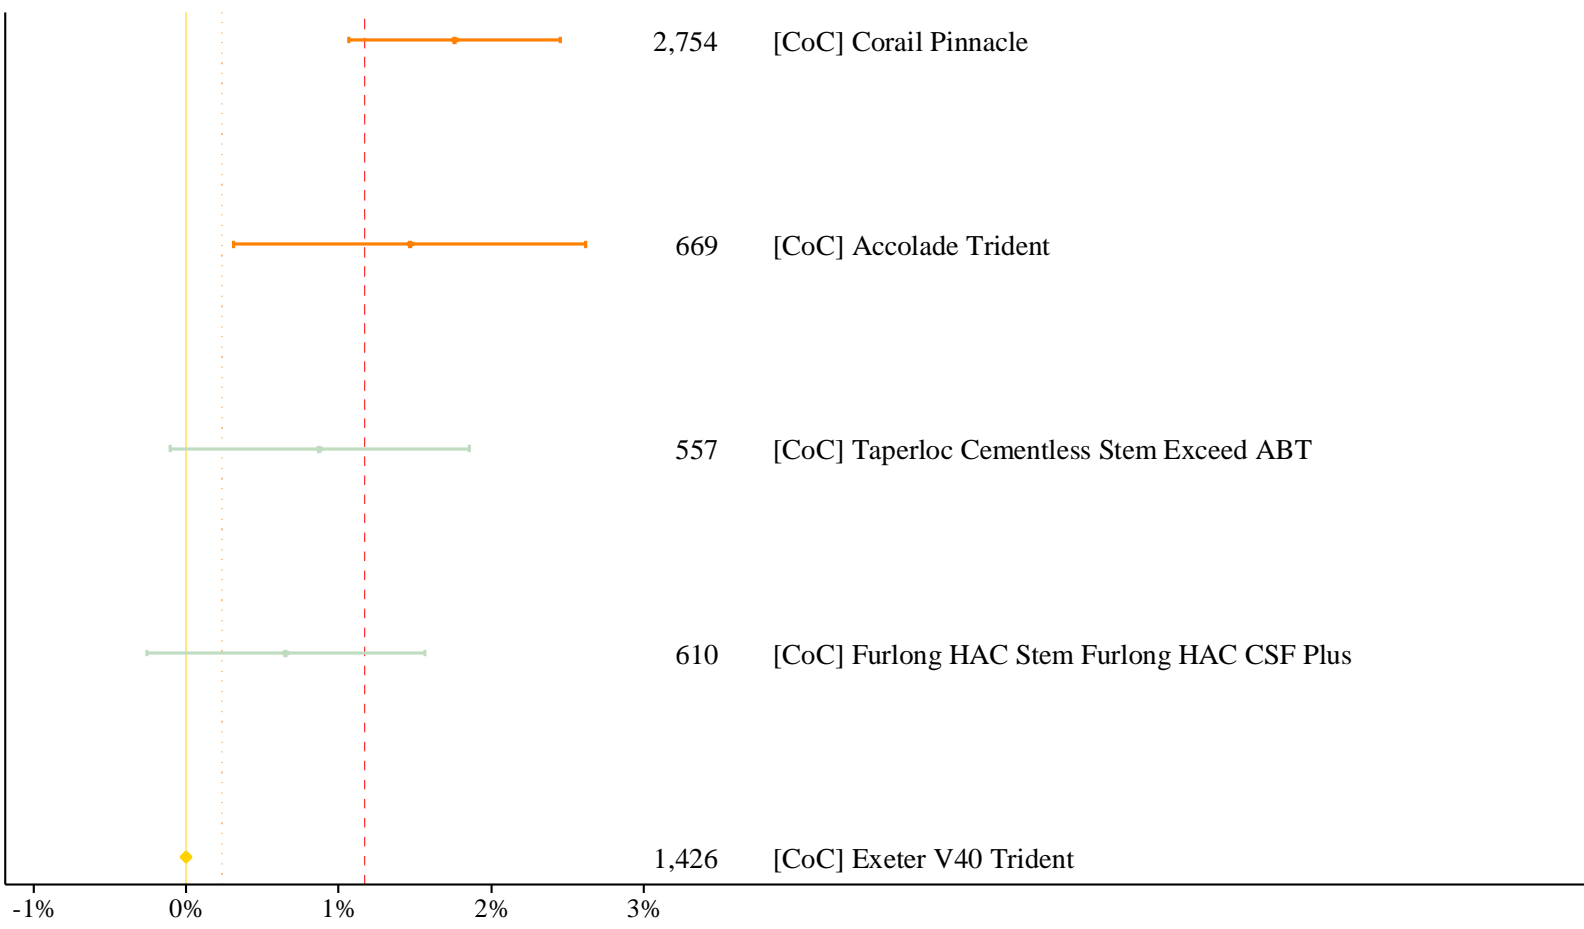

Percentage point difference in failure rate versus reference (1.17%, 95% CI 0.77 - 1.78)

— Non-inferior    
 — Non-inferiority not shown    
 — Inferior by ≥20%    
 — Inferior by ≥100%    
 ◆ Reference

Supplementary Figure 7c: Difference in failure of implanted constructs compared to a contemporary reference at 5 years in women between 55 and 75 years, using all stem-cup combinations with  $\geq 500$  procedures remaining at risk

All stem-cup combinations by bearing type at 5 years in Women 55-75 years

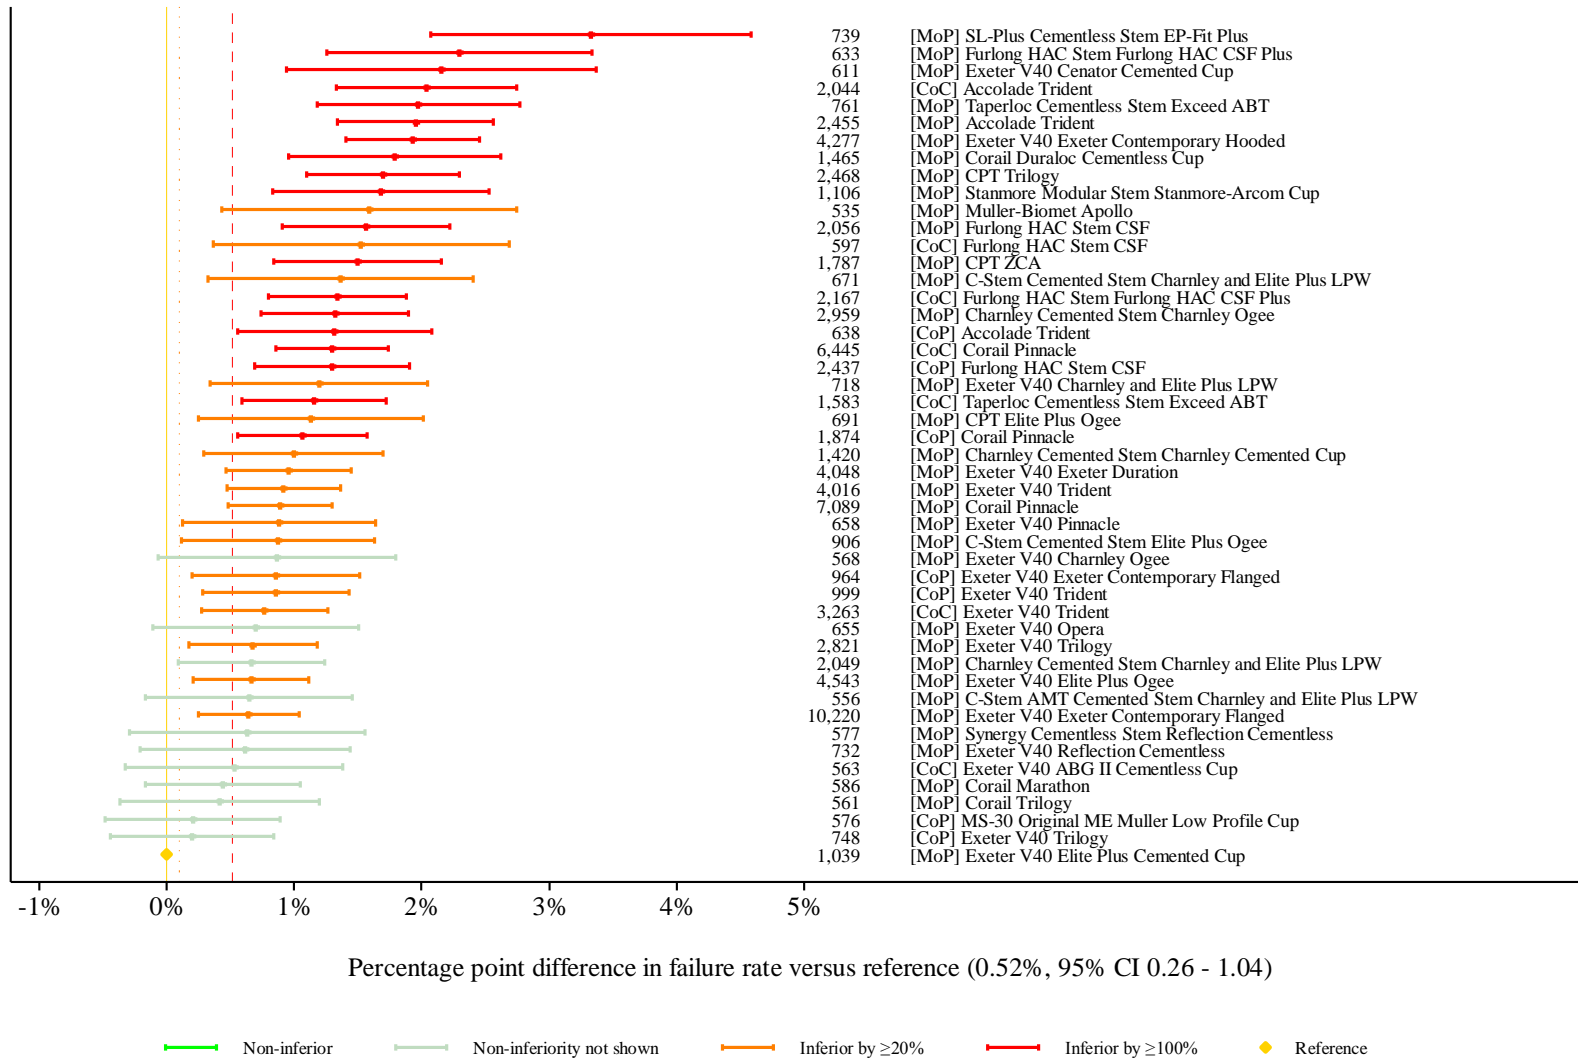



Supplementary Figure 7d: Difference in failure of implanted constructs compared to a contemporary reference at 5 years in women greater than 75 years, using all stem-cup combinations with ≥500 procedures remaining at risk

All stem-cup combinations by bearing type at 5 years in Women >75 years

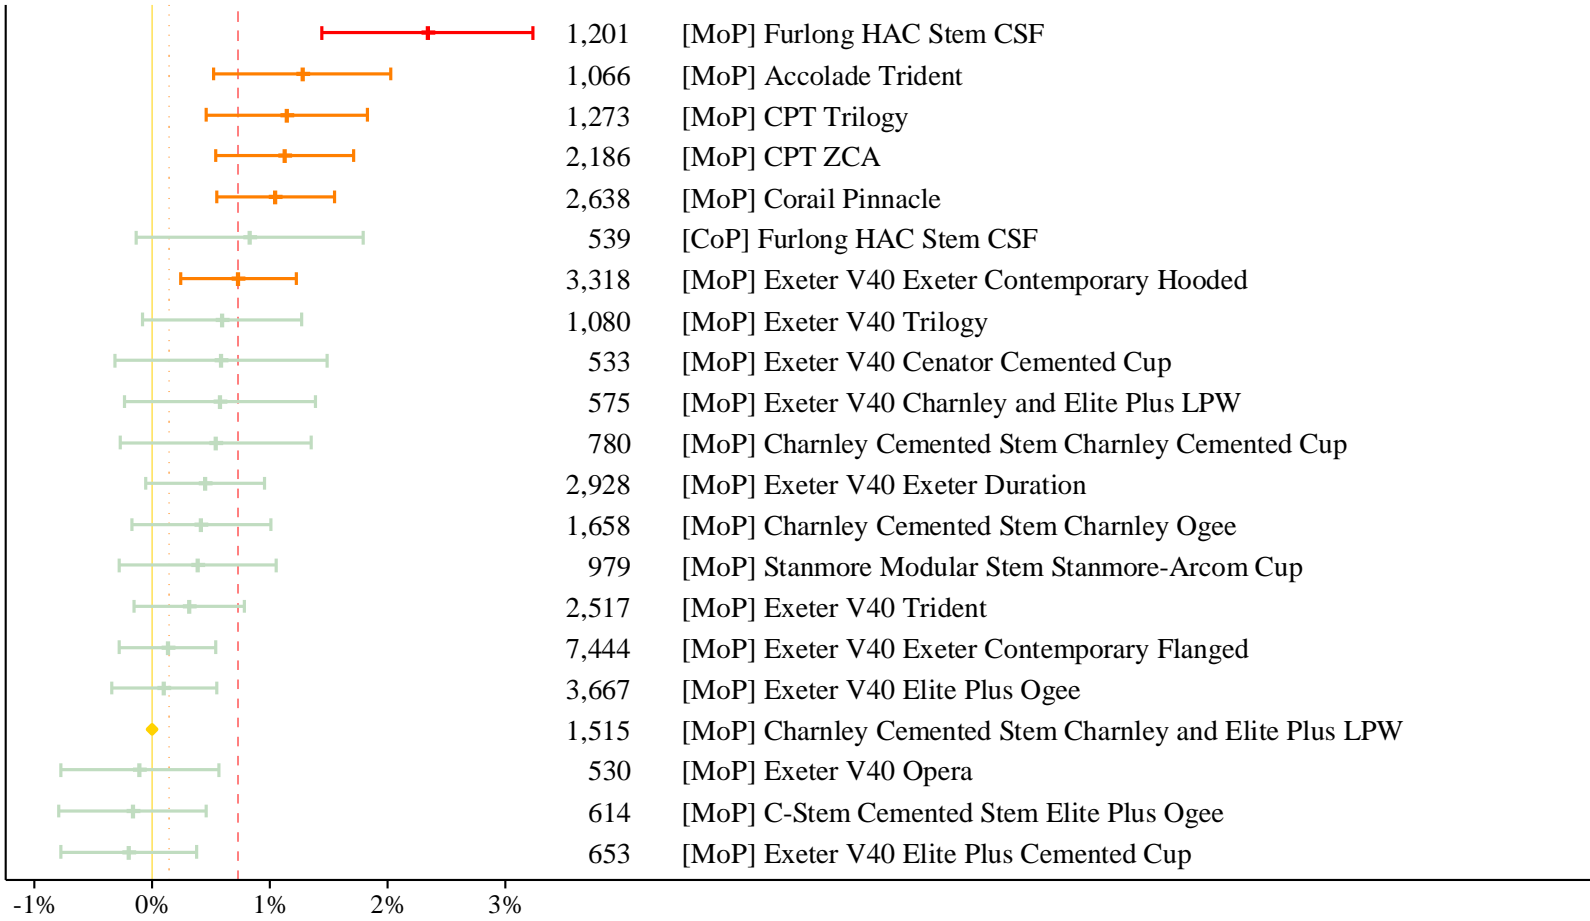

Percentage point difference in failure rate versus reference (0.73%, 95% CI 0.43 - 1.23)

Legend: Non-inferior (green bar), Non-inferiority not shown (light green bar), Inferior by ≥20% (orange bar), Inferior by ≥100% (red bar), Reference (yellow diamond)

Supplementary Figure 8a: Difference in failure of implanted constructs compared to a contemporary reference at 7 years in women, using all stem-cup combinations with  $\geq 500$  procedures remaining at risk

All stem-cup combinations by bearing type at 7 years in Women

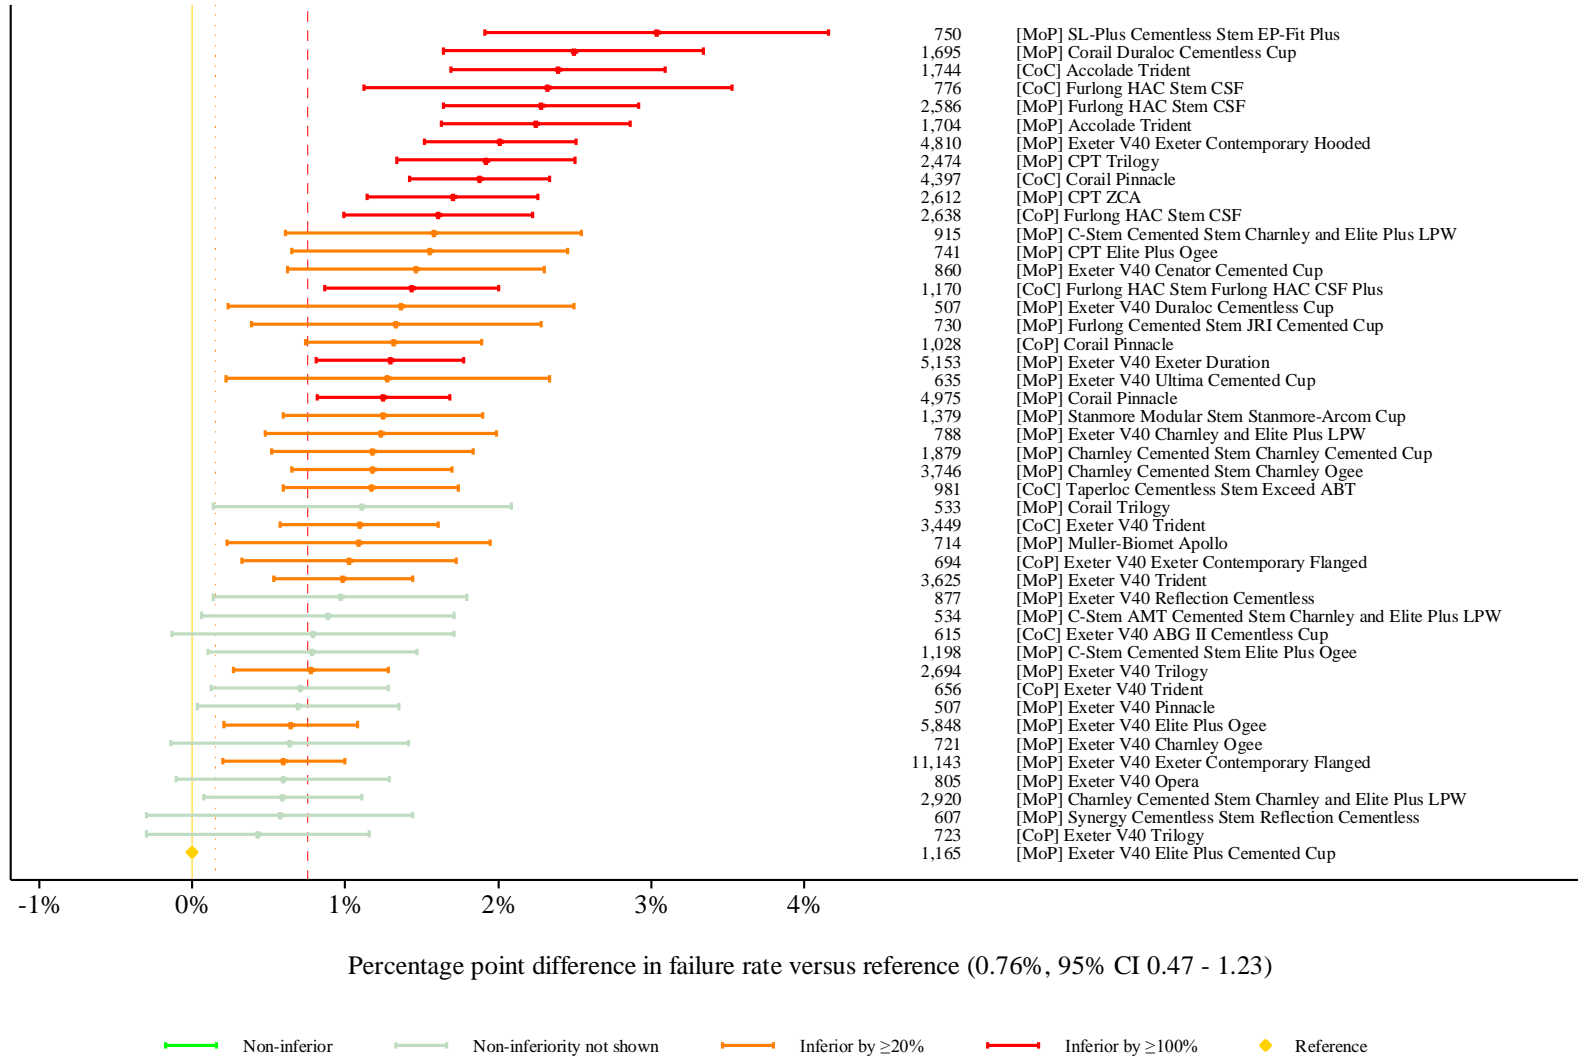

Supplementary Figure 8b: Difference in failure of implanted constructs compared to a contemporary reference at 7 years in women less than 55 years, using all stem-cup combinations with ≥500 procedures remaining at risk

1  
2  
3  
4  
5  
6  
7  
8  
9  
10  
11  
12  
13  
14  
15  
16  
17  
18  
19  
20  
21  
22  
23  
24  
25  
26  
27  
28  
29  
30  
31  
32  
33  
34  
35  
36  
37  
38  
39  
40  
41  
42  
43  
44  
45  
46

All stem-cup combinations by bearing type at 7 years in Women <55 years

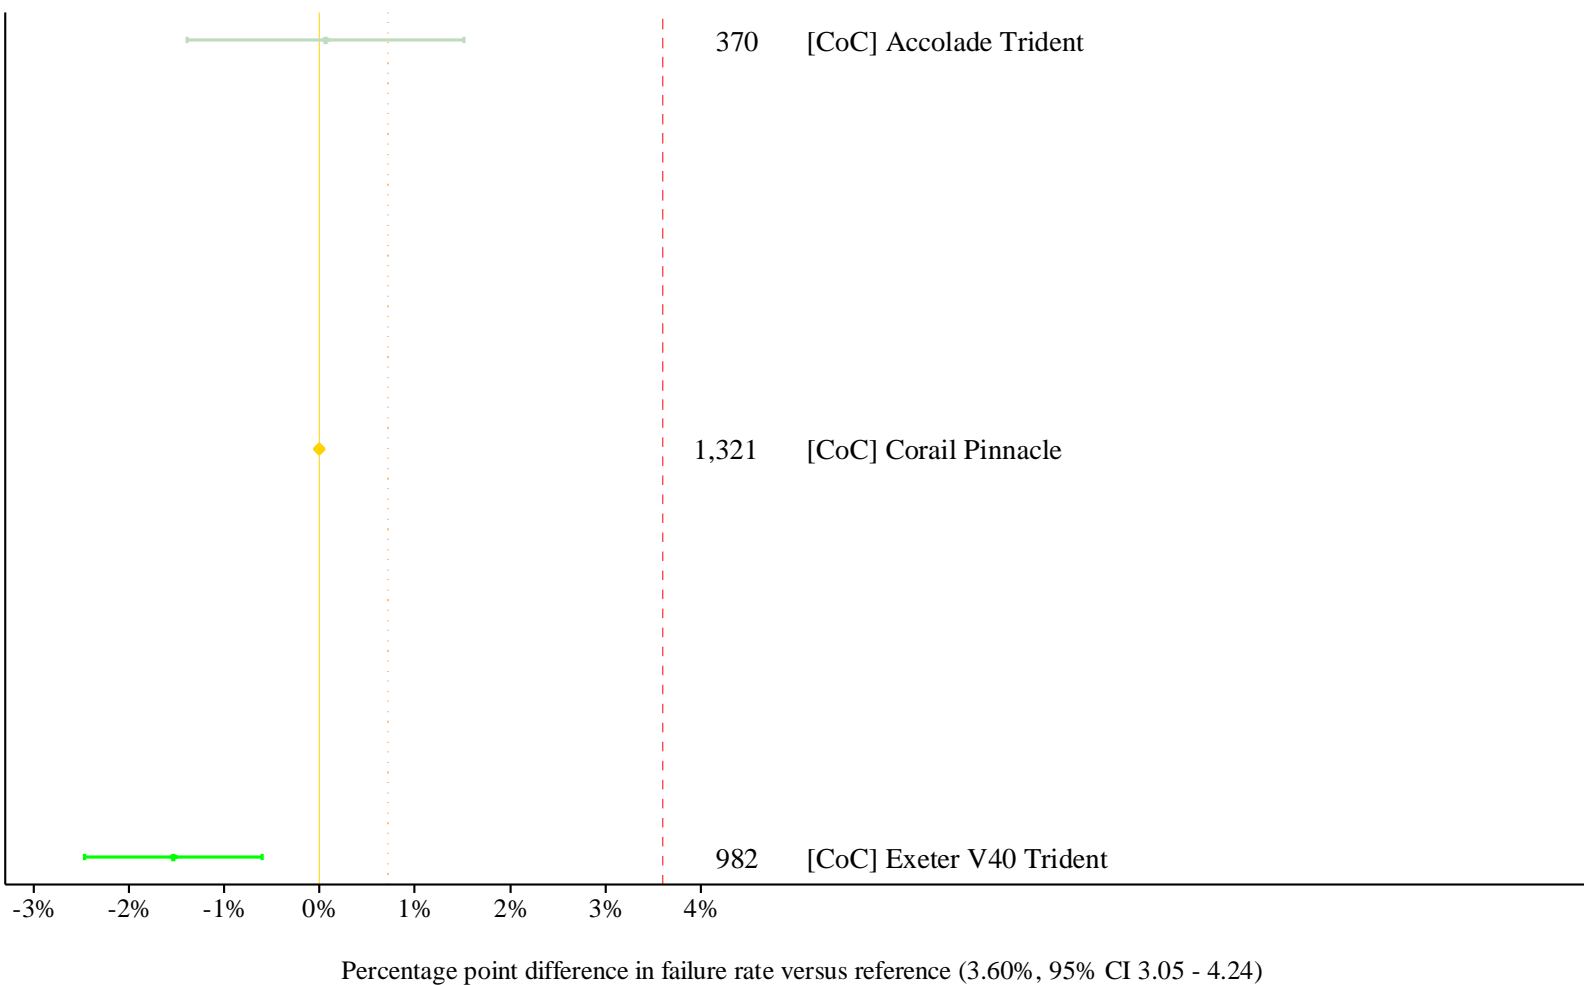

— Non-inferior    
 — Non-inferiority not shown    
 — Inferior by ≥20%    
 — Inferior by ≥100%    
 ◆ Reference

Supplementary Figure 8c: Difference in failure of implanted constructs compared to a contemporary reference at 7 years in women between 55 and 75 years, using all stem-cup combinations with  $\geq 500$  procedures remaining at risk

All stem-cup combinations by bearing type at 7 years in Women 55-75 years

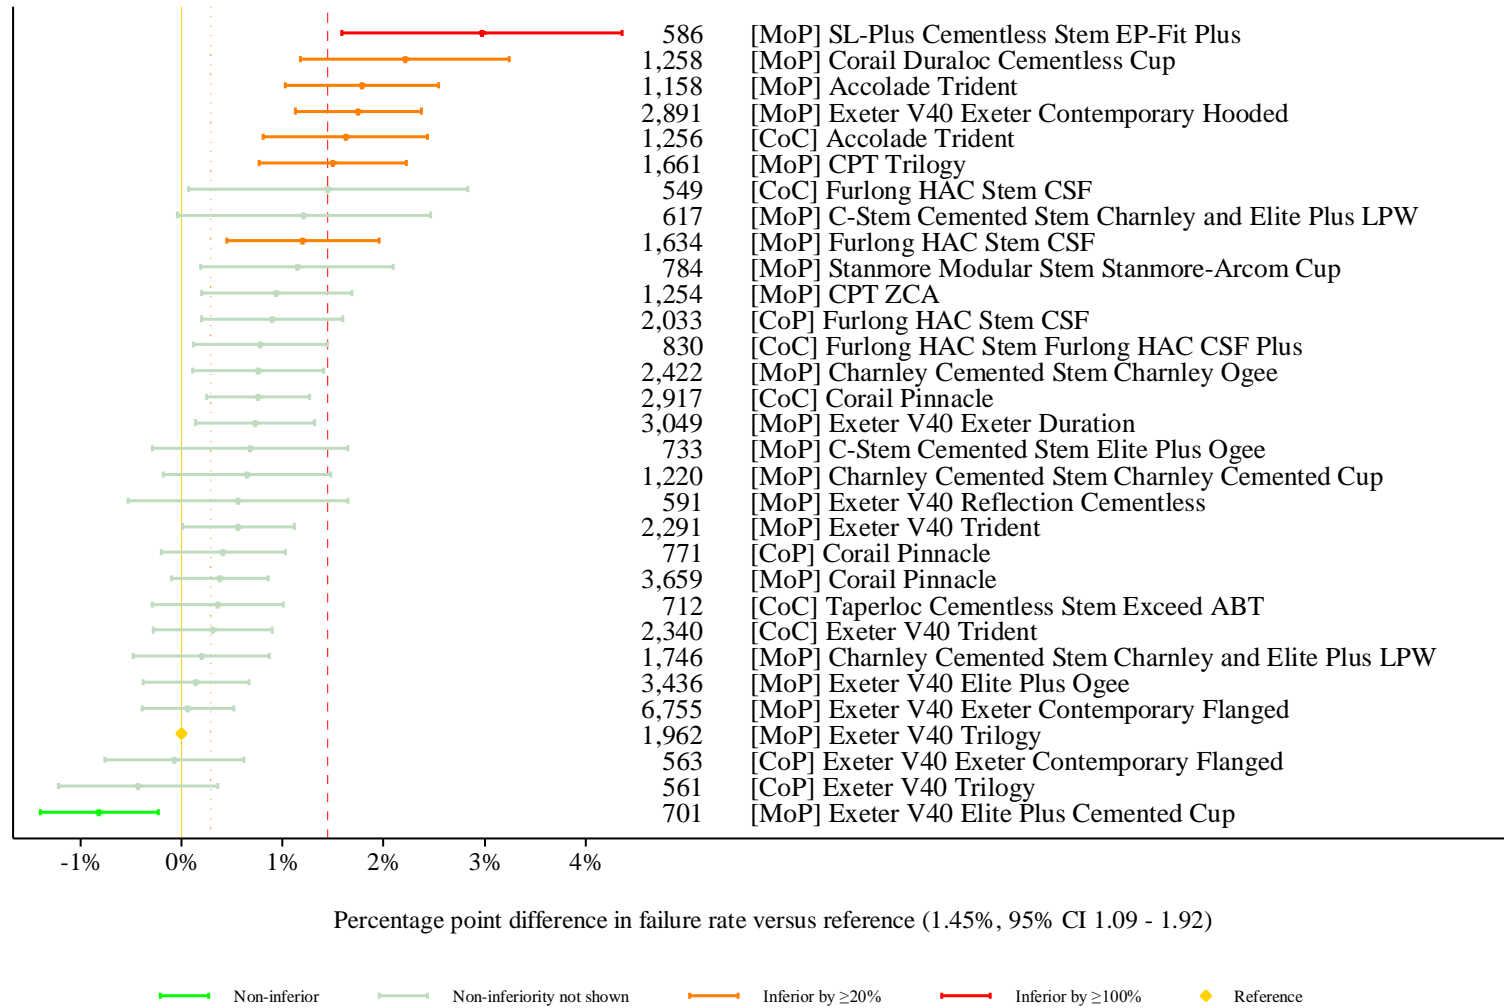

Supplementary Figure 8d: Difference in failure of implanted constructs compared to a contemporary reference at 7 years in women greater than 75 years, using all stem-cup combinations with ≥500 procedures remaining at risk

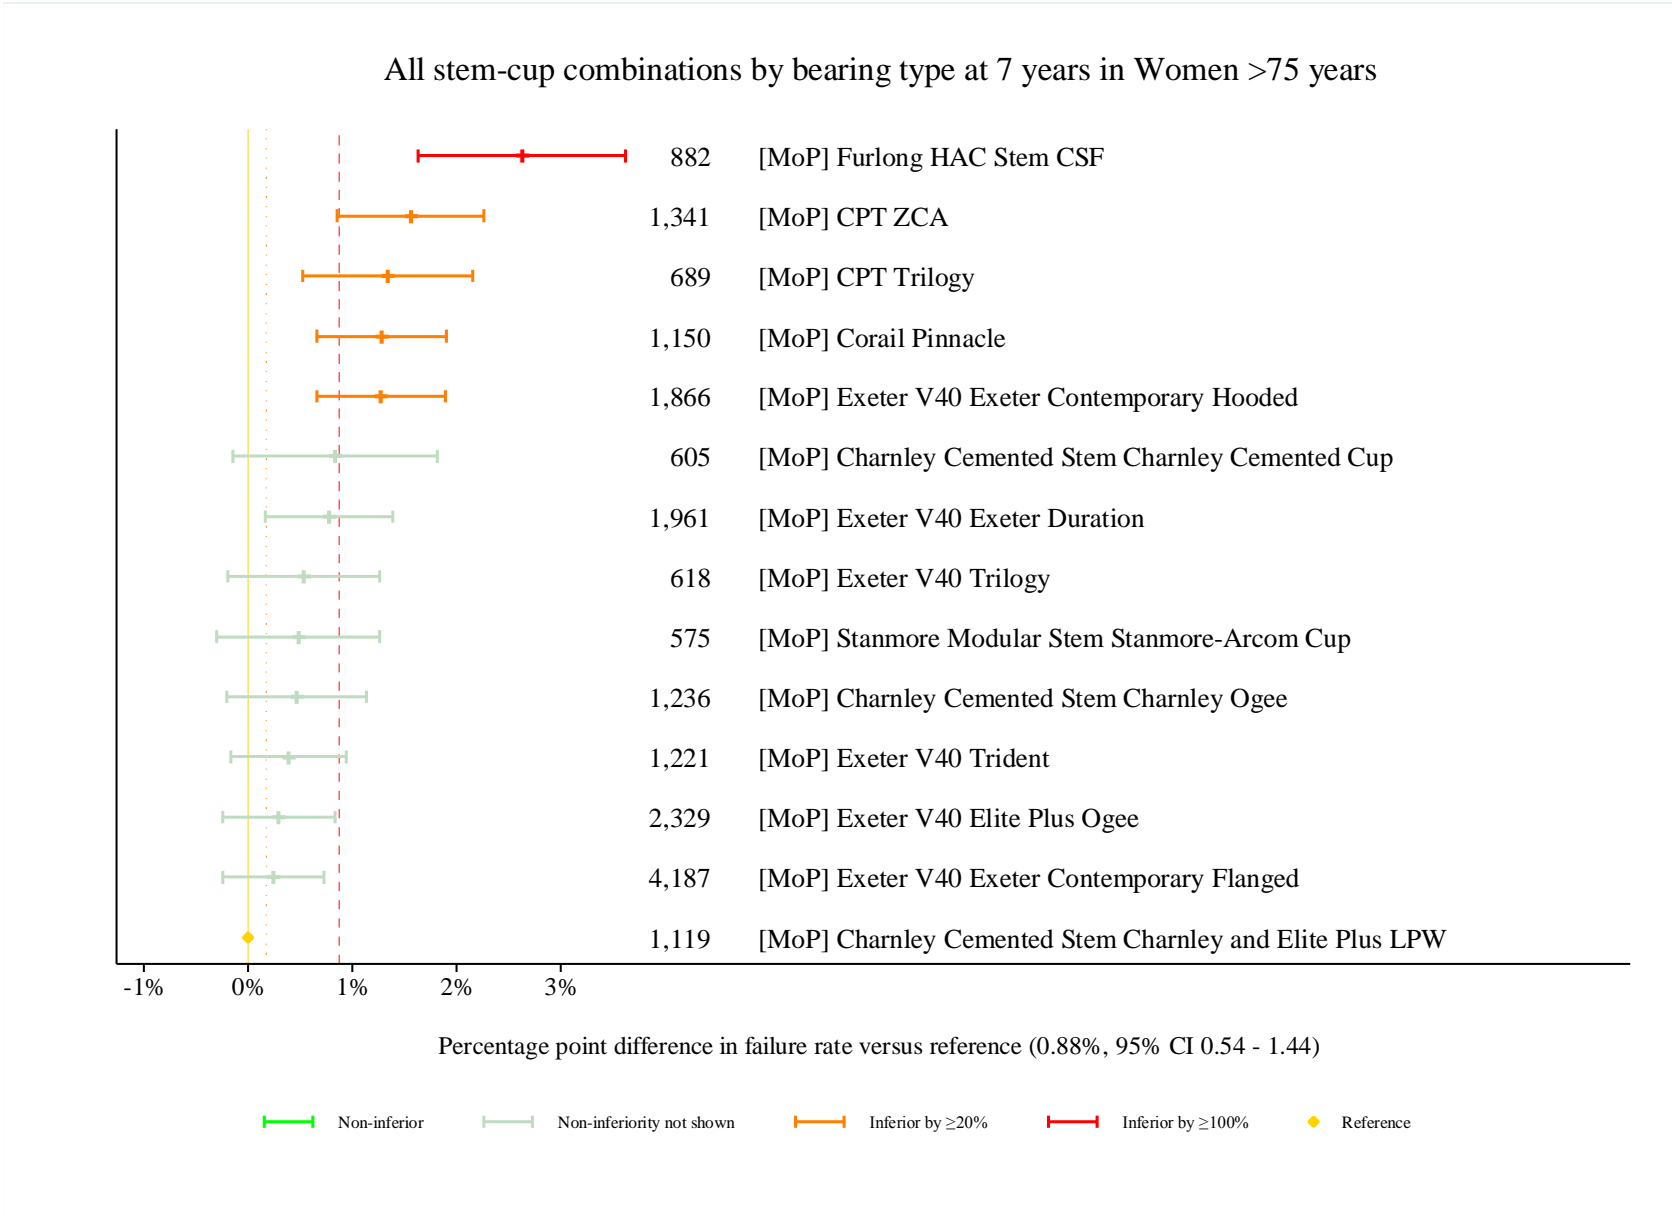

Supplementary Figure 9a: Difference in failure of implanted constructs compared to a contemporary reference at 10 years in women, using all stem-cup combinations with  $\geq 500$  procedures remaining at risk

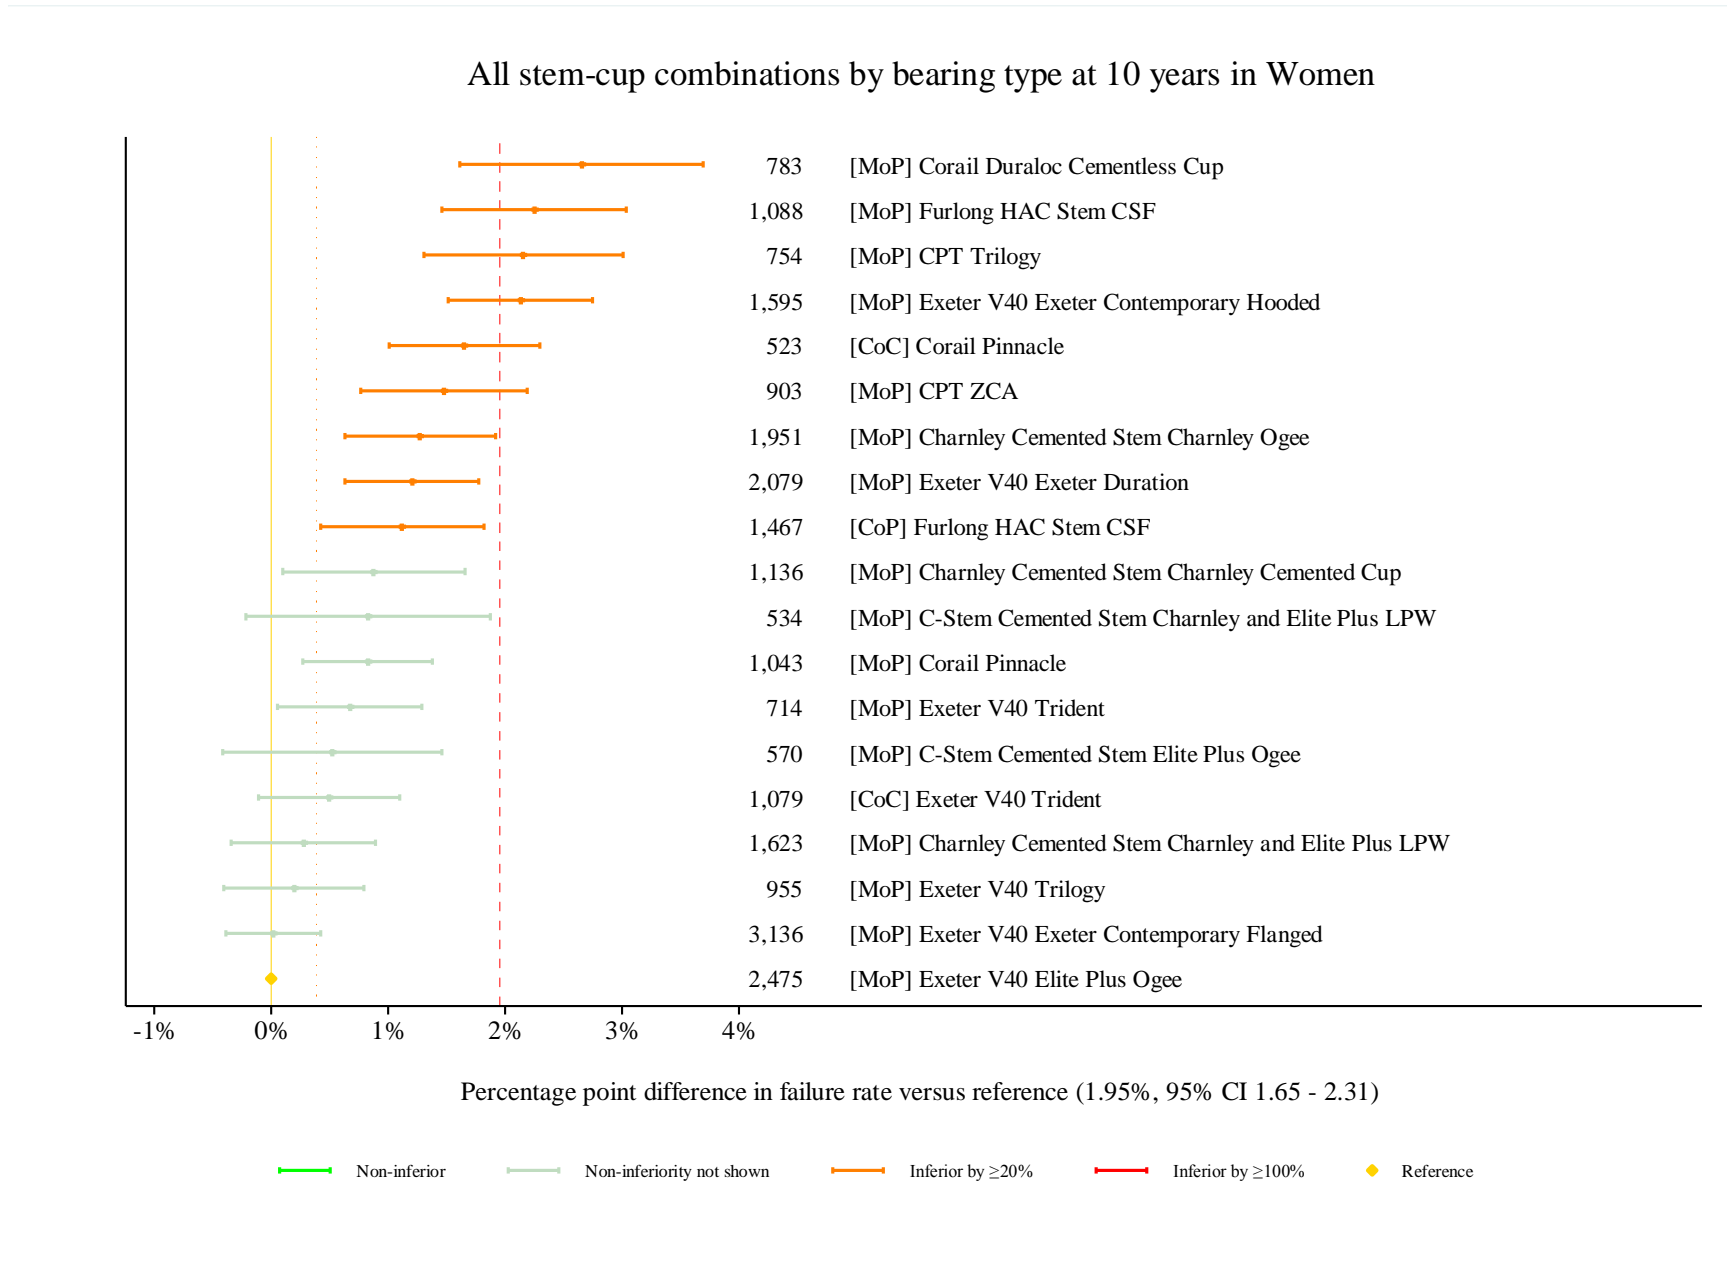

Supplementary Figure 9b: Difference in failure of implanted constructs compared to a contemporary reference at 10 years in women between 55 and 75 years, using all stem-cup combinations with ≥500 procedures remaining at risk

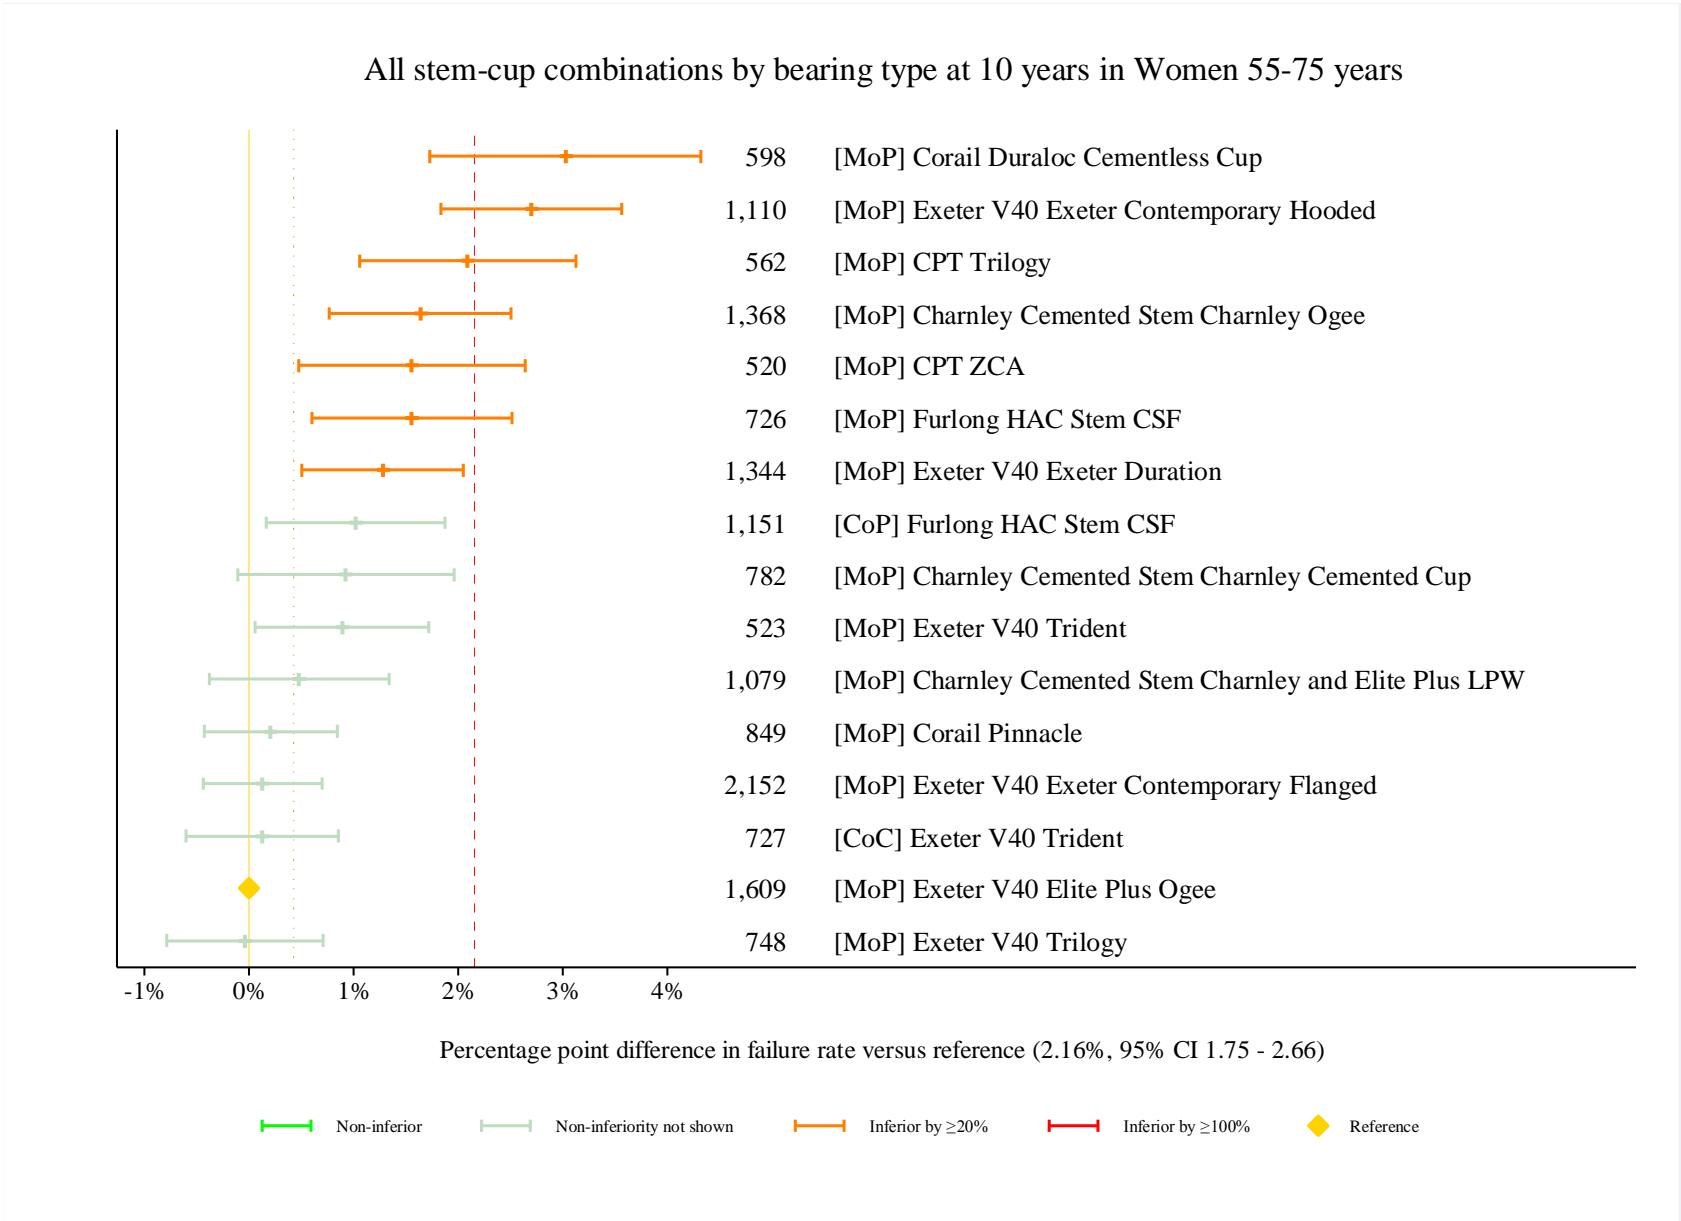

**Supplementary table 1a: Difference in Kaplan-Meier failure estimate between a contemporary reference and implants with at least 250 at risk at 3 years since primary**

| Stem/cup brand                                                | Number at risk | Cumulative failure (%) | Difference in failure (%) | 95% CI         | Equivalence status        | p-value |
|---------------------------------------------------------------|----------------|------------------------|---------------------------|----------------|---------------------------|---------|
| [CoP] MS-30 Original ME Muller Low Profile Cup                | 1,554          | 0.39                   | [REFERENCE]               |                |                           |         |
| [CoC] ABG II Monolithic Cementless Stem ABG II Cementless Cup | 1,061          | 1.82                   | 1.43                      | [ 0.59 , 2.27] | Inferior by $\geq 100\%$  | 0.001   |
| [CoC] ABG II Monolithic Cementless Stem Trident               | 1,007          | 1.98                   | 1.59                      | [ 0.70 , 2.48] | Inferior by $\geq 100\%$  | <0.001  |
| [CoC] AMIStem-H Versafit CC Trio                              | 331            | 2.00                   | 1.61                      | [ 0.44 , 2.77] | Inferior by $\geq 100\%$  | 0.007   |
| [CoC] Accolade Trident                                        | 6,660          | 2.03                   | 1.64                      | [ 1.20 , 2.08] | Inferior by $\geq 100\%$  | <0.001  |
| [CoC] Anthology R3 Cementless                                 | 327            | 1.13                   | 0.74                      | [-0.24 , 1.72] | Non-inferiority not shown | 0.140   |
| [CoC] Bicontact Cementless Stem Plasmacup SC                  | 346            | 1.01                   | 0.62                      | [-0.41 , 1.65] | Non-inferiority not shown | 0.237   |
| [CoC] Bimetric Cementless Stem Exceed ABT                     | 888            | 1.05                   | 0.65                      | [-0.03 , 1.34] | Non-inferiority not shown | 0.059   |
| [CoC] C-Stem AMT Cemented Stem Pinnacle                       | 770            | 0.83                   | 0.44                      | [-0.18 , 1.06] | Non-inferiority not shown | 0.168   |
| [CoC] C-Stem Cemented Stem Pinnacle                           | 342            | 0.54                   | 0.15                      | [-0.65 , 0.95] | Non-inferiority not shown | 0.715   |
| [CoC] CPT Continuum                                           | 801            | 1.71                   | 1.32                      | [ 0.52 , 2.13] | Inferior by $\geq 100\%$  | 0.001   |
| [CoC] CPT Trilogy AB                                          | 525            | 1.12                   | 0.73                      | [-0.21 , 1.67] | Non-inferiority not shown | 0.127   |
| [CoC] CPT Trilogy IT                                          | 314            | 1.14                   | 0.74                      | [-0.13 , 1.62] | Non-inferiority not shown | 0.095   |
| [CoC] Charnley Modular Trilogy AB                             | 252            | 0.39                   | 0.00                      | [-0.82 , 0.81] | Non-inferiority not shown | 0.996   |
| [CoC] Corail Delta TT                                         | 726            | 2.10                   | 1.71                      | [ 0.82 , 2.60] | Inferior by $\geq 100\%$  | <0.001  |
| [CoC] Corail DeltaMotion                                      | 1,147          | 1.40                   | 1.01                      | [ 0.32 , 1.70] | Inferior by $\geq 20\%$   | 0.004   |
| [CoC] Corail Duraloc Option                                   | 1,042          | 1.95                   | 1.56                      | [ 0.68 , 2.43] | Inferior by $\geq 100\%$  | <0.001  |
| [CoC] Corail Pinnacle                                         | 27,047         | 1.79                   | 1.40                      | [ 1.07 , 1.72] | Inferior by $\geq 100\%$  | <0.001  |
| [CoC] Corail Pinnacle Gription                                | 452            | 2.41                   | 2.02                      | [ 0.97 , 3.07] | Inferior by $\geq 100\%$  | <0.001  |
| [CoC] Corail Trinity                                          | 431            | 0.65                   | 0.26                      | [-0.38 , 0.89] | Non-inferiority not shown | 0.430   |
| [CoC] Excia Cementless Plasmacup SC                           | 888            | 1.20                   | 0.81                      | [ 0.12 , 1.50] | Inferior by $\geq 20\%$   | 0.022   |
| [CoC] Exeter V40 ABG II Cementless Cup                        | 1,343          | 0.64                   | 0.25                      | [-0.24 , 0.75] | Non-inferiority not shown | 0.315   |
| [CoC] Exeter V40 Trident                                      | 10,273         | 1.01                   | 0.62                      | [ 0.27 , 0.96] | Inferior by $\geq 20\%$   | <0.001  |
| [CoC] Furlong Evolution Cementless Furlong HAC CSF Plus       | 597            | 1.37                   | 0.98                      | [ 0.36 , 1.60] | Inferior by $\geq 20\%$   | 0.002   |
| [CoC] Furlong HAC Stem CSF                                    | 1,568          | 2.08                   | 1.69                      | [ 0.94 , 2.44] | Inferior by $\geq 100\%$  | <0.001  |
| [CoC] Furlong HAC Stem Furlong HAC CSF Plus                   | 8,977          | 1.59                   | 1.20                      | [ 0.83 , 1.57] | Inferior by $\geq 100\%$  | <0.001  |
| [CoC] Furlong HAC Stem Furlong Threaded                       | 323            | 2.10                   | 1.71                      | [ 0.14 , 3.28] | Inferior by $\geq 20\%$   | 0.033   |
| [CoC] M/L Taper Cementless Continuum                          | 1,393          | 1.63                   | 1.24                      | [ 0.60 , 1.88] | Inferior by $\geq 100\%$  | <0.001  |
| [CoC] M/L Taper Cementless Trilogy IT                         | 257            | 2.94                   | 2.55                      | [ 0.93 , 4.18] | Inferior by $\geq 100\%$  | 0.002   |
| [CoC] M/L Taper Kinectiv Cementless Continuum                 | 258            | 3.39                   | 3.00                      | [ 0.91 , 5.08] | Inferior by $\geq 100\%$  | 0.005   |
| [CoC] Metafix Stem Trinity                                    | 813            | 1.29                   | 0.90                      | [ 0.24 , 1.55] | Inferior by $\geq 20\%$   | 0.007   |
| [CoC] Omnifit Cementless Stem Trident                         | 486            | 1.99                   | 1.60                      | [ 0.34 , 2.85] | Inferior by $\geq 20\%$   | 0.013   |
| [CoC] Polarstem Cementless R3 Cementless                      | 800            | 0.78                   | 0.39                      | [-0.20 , 0.97] | Non-inferiority not shown | 0.195   |
| [CoC] S-Rom Cementless Stem Pinnacle                          | 543            | 3.12                   | 2.73                      | [ 1.38 , 4.08] | Inferior by $\geq 100\%$  | <0.001  |
| [CoC] SL-Plus Cementless Stem EP-Fit Plus                     | 1,202          | 3.46                   | 3.07                      | [ 2.03 , 4.12] | Inferior by $\geq 100\%$  | <0.001  |
| [CoC] SL-Plus Cementless Stem R3 Cementless                   | 539            | 0.80                   | 0.41                      | [-0.35 , 1.16] | Non-inferiority not shown | 0.292   |
| [CoC] SPS Modular April - Ceramic                             | 593            | 1.50                   | 1.11                      | [ 0.14 , 2.07] | Inferior by $\geq 20\%$   | 0.025   |
| [CoC] Summit Cementless Stem Pinnacle                         | 482            | 1.33                   | 0.94                      | [ 0.02 , 1.87] | Non-inferiority not shown | 0.046   |
| [CoC] Synergy Cementless Stem R3 Cementless                   | 280            | 0.96                   | 0.57                      | [-0.41 , 1.54] | Non-inferiority not shown | 0.257   |



|    |                                                               |       |      |       |                |                           |        |
|----|---------------------------------------------------------------|-------|------|-------|----------------|---------------------------|--------|
| 1  | [CoC] Taperloc Cementless Stem Exceed ABT                     | 6,704 | 1.52 | 1.13  | [ 0.75 , 1.51] | Inferior by $\geq 100\%$  | <0.001 |
| 2  | [CoC] Trilock BPS Pinnacle                                    | 341   | 2.06 | 1.67  | [ 0.36 , 2.98] | Inferior by $\geq 20\%$   | 0.012  |
| 3  | [CoC] miniHip Trinity                                         | 713   | 1.91 | 1.52  | [ 0.64 , 2.41] | Inferior by $\geq 100\%$  | 0.001  |
| 4  | [CoP] Accolade Trident                                        | 3,079 | 1.52 | 1.12  | [ 0.67 , 1.58] | Inferior by $\geq 100\%$  | <0.001 |
| 5  | [CoP] C-Stem AMT Cemented Stem Marathon                       | 321   | 0.80 | 0.41  | [-0.34 , 1.15] | Non-inferiority not shown | 0.285  |
| 6  | [CoP] C-Stem AMT Cemented Stem Pinnacle                       | 346   | 1.63 | 1.24  | [ 0.36 , 2.12] | Inferior by $\geq 20\%$   | 0.006  |
| 7  | [CoP] C-Stem Cemented Stem Elite Plus Ogee                    | 607   | 0.57 | 0.18  | [-0.45 , 0.80] | Non-inferiority not shown | 0.583  |
| 8  | [CoP] C-Stem Cemented Stem Marathon                           | 1,150 | 1.03 | 0.64  | [ 0.10 , 1.19] | Inferior by $\geq 20\%$   | 0.021  |
| 9  | [CoP] C-Stem Cemented Stem Opera                              | 785   | 0.63 | 0.23  | [-0.38 , 0.85] | Non-inferiority not shown | 0.457  |
| 10 | [CoP] C-Stem Cemented Stem Wroblewski Golf Ball               | 913   | 0.69 | 0.30  | [-0.29 , 0.88] | Non-inferiority not shown | 0.320  |
| 11 | [CoP] CLS Cementless Stem Trilogy                             | 283   | 0.59 | 0.20  | [-0.67 , 1.06] | Non-inferiority not shown | 0.656  |
| 12 | [CoP] CPT Trilogy                                             | 1,321 | 1.47 | 1.08  | [ 0.59 , 1.58] | Inferior by $\geq 100\%$  | <0.001 |
| 13 | [CoP] CPT ZCA                                                 | 349   | 0.39 | -0.01 | [-0.62 , 0.61] | Non-inferiority not shown | 0.987  |
| 14 | [CoP] Corail Charnley and Elite Plus LPW                      | 627   | 1.72 | 1.33  | [ 0.32 , 2.34] | Inferior by $\geq 20\%$   | 0.010  |
| 15 | [CoP] Corail Duraloc Cementless Cup                           | 301   | 4.40 | 4.01  | [ 1.74 , 6.28] | Inferior by $\geq 100\%$  | 0.001  |
| 16 | [CoP] Corail Elite Plus Cemented Cup                          | 409   | 0.95 | 0.56  | [-0.32 , 1.43] | Non-inferiority not shown | 0.214  |
| 17 | [CoP] Corail Elite Plus Ogee                                  | 464   | 1.70 | 1.31  | [ 0.17 , 2.46] | Inferior by $\geq 20\%$   | 0.024  |
| 18 | [CoP] Corail Marathon                                         | 1,309 | 1.12 | 0.73  | [ 0.20 , 1.26] | Inferior by $\geq 20\%$   | 0.007  |
| 19 | [CoP] Corail Pinnacle                                         | 8,130 | 1.21 | 0.82  | [ 0.48 , 1.16] | Inferior by $\geq 100\%$  | <0.001 |
| 20 | [CoP] Corail Trabecular Metal Modular Cementless Cup          | 335   | 2.76 | 2.36  | [ 0.85 , 3.88] | Inferior by $\geq 100\%$  | 0.002  |
| 21 | [CoP] Corail Trident                                          | 300   | 0.26 | -0.13 | [-0.72 , 0.45] | Non-inferiority not shown | 0.660  |
| 22 | [CoP] Corail Trilogy                                          | 654   | 1.31 | 0.92  | [ 0.02 , 1.81] | Non-inferiority not shown | 0.045  |
| 23 | [CoP] Excia Cementless Plasmacup SC                           | 301   | 0.96 | 0.57  | [-0.32 , 1.47] | Non-inferiority not shown | 0.210  |
| 24 | [CoP] Exeter V40 Charnley and Elite Plus LPW                  | 674   | 1.59 | 1.20  | [ 0.32 , 2.07] | Inferior by $\geq 20\%$   | 0.008  |
| 25 | [CoP] Exeter V40 Elite Plus Ogee                              | 1,190 | 0.70 | 0.31  | [-0.20 , 0.81] | Non-inferiority not shown | 0.231  |
| 26 | [CoP] Exeter V40 Exeter Contemporary Flanged                  | 2,995 | 0.99 | 0.60  | [ 0.18 , 1.03] | Inferior by $\geq 20\%$   | 0.005  |
| 27 | [CoP] Exeter V40 Exeter Contemporary Hooded                   | 779   | 2.03 | 1.64  | [ 0.70 , 2.57] | Inferior by $\geq 100\%$  | 0.001  |
| 28 | [CoP] Exeter V40 Exeter Duration                              | 775   | 0.66 | 0.27  | [-0.33 , 0.88] | Non-inferiority not shown | 0.378  |
| 29 | [CoP] Exeter V40 Exeter X3 Rimfit                             | 2,175 | 0.99 | 0.60  | [ 0.18 , 1.02] | Inferior by $\geq 20\%$   | 0.005  |
| 30 | [CoP] Exeter V40 Marathon                                     | 485   | 0.70 | 0.31  | [-0.34 , 0.96] | Non-inferiority not shown | 0.349  |
| 31 | [CoP] Exeter V40 Pinnacle                                     | 542   | 1.14 | 0.75  | [ 0.07 , 1.42] | Non-inferiority not shown | 0.030  |
| 32 | [CoP] Exeter V40 Trident                                      | 4,857 | 0.88 | 0.48  | [ 0.14 , 0.83] | Inferior by $\geq 20\%$   | 0.006  |
| 33 | [CoP] Exeter V40 Trilogy                                      | 1,945 | 1.05 | 0.66  | [ 0.14 , 1.17] | Inferior by $\geq 20\%$   | 0.013  |
| 34 | [CoP] Exeter V40 Tritanium                                    | 437   | 1.91 | 1.52  | [ 0.60 , 2.45] | Inferior by $\geq 100\%$  | 0.001  |
| 35 | [CoP] Furlong HAC Stem CSF                                    | 6,284 | 1.26 | 0.87  | [ 0.48 , 1.26] | Inferior by $\geq 100\%$  | <0.001 |
| 36 | [CoP] Furlong HAC Stem Furlong HAC CSF Plus                   | 1,538 | 1.84 | 1.45  | [ 0.81 , 2.09] | Inferior by $\geq 100\%$  | <0.001 |
| 37 | [CoP] Furlong HAC Stem Furlong Threaded                       | 388   | 0.50 | 0.11  | [-0.64 , 0.86] | Non-inferiority not shown | 0.778  |
| 38 | [CoP] M/L Taper Cementless Continuum                          | 391   | 2.79 | 2.40  | [ 1.26 , 3.53] | Inferior by $\geq 100\%$  | <0.001 |
| 39 | [CoP] Muller Straight Stem Original ME Muller Low Profile Cup | 364   | 1.22 | 0.83  | [-0.19 , 1.85] | Non-inferiority not shown | 0.110  |
| 40 | [CoP] SL-Plus Cementless Stem Bicon-Plus                      | 620   | 2.56 | 2.17  | [ 0.93 , 3.40] | Inferior by $\geq 100\%$  | 0.001  |
| 41 | [CoP] SL-Plus Cementless Stem EP-Fit Plus                     | 958   | 1.89 | 1.50  | [ 0.61 , 2.39] | Inferior by $\geq 100\%$  | 0.001  |
| 42 | [CoP] SP II Cemented Stem Interplanta                         | 310   | 0.00 | --    | [ -- , -- ]    | No failures to date       |        |
| 43 | [CoP] Stanmore Modular Stem Stanmore-Arcom Cup                | 355   | 1.19 | 0.80  | [-0.28 , 1.88] | Non-inferiority not shown | 0.145  |
| 44 | [CoP] Taperloc Cementless Stem Exceed ABT                     | 1,879 | 1.07 | 0.68  | [ 0.23 , 1.13] | Inferior by $\geq 20\%$   | 0.003  |
| 45 | [CoP] Versys Cementless Stem Trilogy                          | 363   | 1.07 | 0.68  | [-0.40 , 1.76] | Non-inferiority not shown | 0.220  |
| 46 | [MoP] ABG II Monolithic Cementless Stem ABG II Cementless Cup | 442   | 1.70 | 1.31  | [ 0.10 , 2.51] | Inferior by $\geq 20\%$   | 0.033  |

|    |                                                            |       |      |       |                |                           |        |
|----|------------------------------------------------------------|-------|------|-------|----------------|---------------------------|--------|
| 1  | [MoP] ABG II Monolithic Cementless Stem Trident            | 440   | 3.19 | 2.80  | [ 1.18 , 4.42] | Inferior by $\geq 100\%$  | 0.001  |
| 2  | [MoP] Accolade Trident                                     | 9,084 | 2.01 | 1.62  | [ 1.23 , 2.02] | Inferior by $\geq 100\%$  | <0.001 |
| 3  | [MoP] Anthology R3 Cementless                              | 1,155 | 1.76 | 1.36  | [ 0.73 , 2.00] | Inferior by $\geq 100\%$  | <0.001 |
| 4  | [MoP] Bimetric Cementless Stem Mallory-Head Cementless Cup | 359   | 2.05 | 1.66  | [ 0.42 , 2.90] | Inferior by $\geq 100\%$  | 0.009  |
| 5  | [MoP] C-Stem AMT Cemented Stem Charnley and Elite Plus LPW | 2,153 | 1.15 | 0.76  | [ 0.26 , 1.26] | Inferior by $\geq 20\%$   | 0.003  |
| 6  | [MoP] C-Stem AMT Cemented Stem Elite Plus Cemented Cup     | 612   | 0.88 | 0.48  | [-0.27 , 1.24] | Non-inferiority not shown | 0.209  |
| 7  | [MoP] C-Stem AMT Cemented Stem Ogee                        | 1,608 | 0.77 | 0.38  | [-0.09 , 0.85] | Non-inferiority not shown | 0.116  |
| 8  | [MoP] C-Stem AMT Cemented Stem Marathon                    | 1,157 | 0.93 | 0.54  | [ 0.07 , 1.00] | Non-inferiority not shown | 0.023  |
| 9  | [MoP] C-Stem AMT Cemented Stem Pinnacle                    | 1,478 | 1.22 | 0.83  | [ 0.35 , 1.31] | Inferior by $\geq 20\%$   | 0.001  |
| 10 | [MoP] C-Stem Cemented Stem Charnley Ogee                   | 847   | 1.31 | 0.92  | [ 0.15 , 1.68] | Inferior by $\geq 20\%$   | 0.019  |
| 11 | [MoP] C-Stem Cemented Stem Charnley and Elite Plus LPW     | 1,594 | 1.05 | 0.66  | [ 0.10 , 1.23] | Inferior by $\geq 20\%$   | 0.022  |
| 12 | [MoP] C-Stem Cemented Stem Duraloc Cementless Cup          | 535   | 2.10 | 1.71  | [ 0.50 , 2.92] | Inferior by $\geq 100\%$  | 0.006  |
| 13 | [MoP] C-Stem Cemented Stem Elite Plus Cemented Cup         | 650   | 0.56 | 0.17  | [-0.45 , 0.79] | Non-inferiority not shown | 0.590  |
| 14 | [MoP] C-Stem Cemented Stem Elite Plus Ogee                 | 3,208 | 0.88 | 0.49  | [ 0.07 , 0.91] | Non-inferiority not shown | 0.022  |
| 15 | [MoP] C-Stem Cemented Stem Marathon                        | 1,556 | 0.92 | 0.53  | [ 0.05 , 1.00] | Non-inferiority not shown | 0.029  |
| 16 | [MoP] C-Stem Cemented Stem Opera                           | 1,363 | 1.04 | 0.65  | [ 0.05 , 1.25] | Non-inferiority not shown | 0.033  |
| 17 | [MoP] C-Stem Cemented Stem Pinnacle                        | 417   | 1.56 | 1.17  | [ 0.06 , 2.28] | Non-inferiority not shown | 0.039  |
| 18 | [MoP] C-Stem Cemented Stem Polarcup Cementless             | 268   | 0.71 | 0.32  | [-0.70 , 1.35] | Non-inferiority not shown | 0.539  |
| 19 | [MoP] C-Stem Cemented Stem Trilogy                         | 364   | 0.53 | 0.14  | [-0.65 , 0.93] | Non-inferiority not shown | 0.730  |
| 20 | [MoP] C-Stem Cemented Stem Wroblewski Golf Ball            | 978   | 0.94 | 0.55  | [-0.10 , 1.20] | Non-inferiority not shown | 0.098  |
| 21 | [MoP] CCA Cemented Stem CCB Cup                            | 1,129 | 0.57 | 0.18  | [-0.31 , 0.68] | Non-inferiority not shown | 0.469  |
| 22 | [MoP] CLS Cementless Stem Allofit                          | 600   | 2.56 | 2.17  | [ 0.93 , 3.40] | Inferior by $\geq 100\%$  | 0.001  |
| 23 | [MoP] CLS Cementless Stem Trilogy                          | 559   | 2.80 | 2.40  | [ 1.06 , 3.75] | Inferior by $\geq 100\%$  | <0.001 |
| 24 | [MoP] CMK Modular Cemented Stem CMK Cemented Cup           | 462   | 0.41 | 0.02  | [-0.62 , 0.67] | Non-inferiority not shown | 0.943  |
| 25 | [MoP] CPCS Opera                                           | 1,174 | 0.82 | 0.42  | [-0.16 , 1.01] | Non-inferiority not shown | 0.152  |
| 26 | [MoP] CPCS Polarcup Cementless                             | 400   | 0.49 | 0.09  | [-0.64 , 0.83] | Non-inferiority not shown | 0.801  |
| 27 | [MoP] CPCS Reflection Cemented                             | 382   | 1.02 | 0.63  | [-0.14 , 1.40] | Non-inferiority not shown | 0.107  |
| 28 | [MoP] CPS Plus Cenator Cemented Cup                        | 381   | 0.26 | -0.13 | [-0.72 , 0.46] | Non-inferiority not shown | 0.662  |
| 29 | [MoP] CPS Plus EP-Fit Plus                                 | 301   | 1.58 | 1.19  | [-0.21 , 2.60] | Non-inferiority not shown | 0.097  |
| 30 | [MoP] CPS Plus Opera                                       | 490   | 1.55 | 1.16  | [ 0.05 , 2.27] | Non-inferiority not shown | 0.040  |
| 31 | [MoP] CPT Allofit                                          | 686   | 0.55 | 0.16  | [-0.38 , 0.69] | Non-inferiority not shown | 0.561  |
| 32 | [MoP] CPT Continuum                                        | 480   | 2.60 | 2.20  | [ 1.33 , 3.08] | Inferior by $\geq 100\%$  | <0.001 |
| 33 | [MoP] CPT Elite Plus Ogee                                  | 2,410 | 1.38 | 0.99  | [ 0.47 , 1.52] | Inferior by $\geq 100\%$  | <0.001 |
| 34 | [MoP] CPT Exceed                                           | 284   | 3.02 | 2.63  | [ 0.66 , 4.59] | Inferior by $\geq 100\%$  | 0.009  |
| 35 | [MoP] CPT Exeter Contemporary Flanged                      | 386   | 2.10 | 1.71  | [ 0.50 , 2.92] | Inferior by $\geq 100\%$  | 0.006  |
| 36 | [MoP] CPT Opera                                            | 406   | 1.40 | 1.01  | [-0.14 , 2.16] | Non-inferiority not shown | 0.086  |
| 37 | [MoP] CPT Original ME Muller Low Profile Cup               | 833   | 1.20 | 0.81  | [ 0.09 , 1.53] | Inferior by $\geq 20\%$   | 0.028  |
| 38 | [MoP] CPT Pinnacle                                         | 753   | 1.70 | 1.31  | [ 0.38 , 2.24] | Inferior by $\geq 20\%$   | 0.006  |
| 39 | [MoP] CPT Trabecular Metal Modular Cementless Cup          | 891   | 1.66 | 1.27  | [ 0.50 , 2.03] | Inferior by $\geq 100\%$  | 0.001  |
| 40 | [MoP] CPT Trilogy                                          | 8,372 | 1.37 | 0.98  | [ 0.62 , 1.34] | Inferior by $\geq 100\%$  | <0.001 |
| 41 | [MoP] CPT Trilogy IT                                       | 450   | 2.89 | 2.50  | [ 1.61 , 3.40] | Inferior by $\geq 100\%$  | <0.001 |
| 42 | [MoP] CPT ZCA                                              | 7,529 | 1.39 | 1.00  | [ 0.63 , 1.37] | Inferior by $\geq 100\%$  | <0.001 |
| 43 | [MoP] Centrament Chirulen                                  | 378   | 0.24 | -0.15 | [-0.71 , 0.41] | Non-inferiority not shown | 0.608  |
| 44 | [MoP] Charnley Cemented Stem Charnley Cemented Cup         | 4,078 | 1.11 | 0.71  | [ 0.29 , 1.14] | Inferior by $\geq 20\%$   | 0.001  |
| 45 | [MoP] Charnley Cemented Stem Charnley Ogee                 | 8,701 | 1.18 | 0.79  | [ 0.43 , 1.15] | Inferior by $\geq 100\%$  | <0.001 |
| 46 | [MoP] Charnley Cemented Stem Charnley and Elite Plus LPW   | 5,770 | 0.72 | 0.32  | [-0.03 , 0.68] | Non-inferiority not shown | 0.075  |

|    |                                                            |        |      |       |                |                           |        |
|----|------------------------------------------------------------|--------|------|-------|----------------|---------------------------|--------|
| 1  | [MoP] Charnley Cemented Stem Opera                         | 1,229  | 0.85 | 0.46  | [-0.12 , 1.04] | Non-inferiority not shown | 0.119  |
| 2  | [MoP] Charnley Cemented Stem Wroblewski Golf Ball          | 990    | 1.50 | 1.10  | [ 0.32 , 1.89] | Inferior by $\geq 20\%$   | 0.006  |
| 3  | [MoP] Charnley Modular Charnley and Elite Plus LPW         | 363    | 0.27 | -0.12 | [-0.73 , 0.49] | Non-inferiority not shown | 0.702  |
| 4  | [MoP] Corail Charnley and Elite Plus LPW                   | 723    | 1.36 | 0.97  | [ 0.18 , 1.76] | Inferior by $\geq 20\%$   | 0.017  |
| 5  | [MoP] Corail Duraloc Cementless Cup                        | 3,449  | 1.41 | 1.02  | [ 0.54 , 1.50] | Inferior by $\geq 100\%$  | <0.001 |
| 6  | [MoP] Corail Elite Plus Cemented Cup                       | 964    | 0.81 | 0.42  | [-0.19 , 1.02] | Non-inferiority not shown | 0.175  |
| 7  | [MoP] Corail Elite Plus Ogee                               | 1,407  | 1.22 | 0.83  | [ 0.24 , 1.42] | Inferior by $\geq 20\%$   | 0.005  |
| 8  | [MoP] Corail Exeter Contemporary Flanged                   | 571    | 1.13 | 0.73  | [-0.06 , 1.53] | Non-inferiority not shown | 0.070  |
| 9  | [MoP] Corail Marathon                                      | 2,848  | 1.05 | 0.66  | [ 0.24 , 1.07] | Inferior by $\geq 20\%$   | 0.002  |
| 10 | [MoP] Corail Pinnacle                                      | 28,253 | 1.37 | 0.98  | [ 0.67 , 1.29] | Inferior by $\geq 100\%$  | <0.001 |
| 11 | [MoP] Corail Pinnacle Gription                             | 382    | 1.54 | 1.15  | [ 0.34 , 1.95] | Inferior by $\geq 20\%$   | 0.005  |
| 12 | [MoP] Corail Trident                                       | 585    | 1.54 | 1.15  | [ 0.33 , 1.96] | Inferior by $\geq 20\%$   | 0.006  |
| 13 | [MoP] Corail Trilogy                                       | 1,791  | 1.14 | 0.74  | [ 0.20 , 1.29] | Inferior by $\geq 20\%$   | 0.007  |
| 14 | [MoP] Elite Plus Cemented Stem Charnley and Elite Plus LPW | 331    | 1.66 | 1.27  | [-0.08 , 2.62] | Non-inferiority not shown | 0.065  |
| 15 | [MoP] Elite Plus Cemented Stem Elite Plus Ogee             | 576    | 0.34 | -0.05 | [-0.60 , 0.50] | Non-inferiority not shown | 0.848  |
| 16 | [MoP] Excia Cementless Plasmacup SC                        | 316    | 3.20 | 2.81  | [ 1.00 , 4.62] | Inferior by $\geq 100\%$  | 0.002  |
| 17 | [MoP] Exeter Elite Plus Ogee                               | 282    | 0.33 | -0.06 | [-0.77 , 0.65] | Non-inferiority not shown | 0.871  |
| 18 | [MoP] Exeter V40 ABG II Cementless Cup                     | 734    | 1.28 | 0.89  | [ 0.05 , 1.73] | Non-inferiority not shown | 0.038  |
| 19 | [MoP] Exeter V40 Cenator Cemented Cup                      | 2,129  | 1.40 | 1.01  | [ 0.45 , 1.57] | Inferior by $\geq 100\%$  | <0.001 |
| 20 | [MoP] Exeter V40 Charnley Cemented Cup                     | 314    | 0.87 | 0.48  | [-0.55 , 1.51] | Non-inferiority not shown | 0.358  |
| 21 | [MoP] Exeter V40 Charnley Ogee                             | 1,315  | 0.95 | 0.56  | [-0.02 , 1.14] | Non-inferiority not shown | 0.057  |
| 22 | [MoP] Exeter V40 Charnley and Elite Plus LPW               | 2,477  | 1.25 | 0.86  | [ 0.37 , 1.35] | Inferior by $\geq 20\%$   | 0.001  |
| 23 | [MoP] Exeter V40 Duraloc Cementless Cup                    | 1,061  | 1.46 | 1.06  | [ 0.30 , 1.83] | Inferior by $\geq 20\%$   | 0.006  |
| 24 | [MoP] Exeter V40 EP-Fit Plus                               | 539    | 1.44 | 1.05  | [ 0.02 , 2.08] | Non-inferiority not shown | 0.046  |
| 25 | [MoP] Exeter V40 Elite Plus Cemented Cup                   | 3,599  | 0.58 | 0.19  | [-0.18 , 0.56] | Non-inferiority not shown | 0.314  |
| 26 | [MoP] Exeter V40 Elite Plus Ogee                           | 16,477 | 0.79 | 0.40  | [ 0.08 , 0.71] | Inferior by $\geq 20\%$   | 0.014  |
| 27 | [MoP] Exeter V40 Exceed                                    | 494    | 0.94 | 0.55  | [-0.32 , 1.42] | Non-inferiority not shown | 0.215  |
| 28 | [MoP] Exeter V40 Exceed ABT                                | 456    | 0.60 | 0.21  | [-0.45 , 0.87] | Non-inferiority not shown | 0.528  |
| 29 | [MoP] Exeter V40 Exeter Contemporary Flanged               | 40,794 | 0.85 | 0.46  | [ 0.15 , 0.76] | Inferior by $\geq 20\%$   | 0.003  |
| 30 | [MoP] Exeter V40 Exeter Contemporary Hooded                | 16,021 | 1.53 | 1.14  | [ 0.80 , 1.47] | Inferior by $\geq 100\%$  | <0.001 |
| 31 | [MoP] Exeter V40 Exeter Duration                           | 12,935 | 1.23 | 0.84  | [ 0.50 , 1.18] | Inferior by $\geq 100\%$  | <0.001 |
| 32 | [MoP] Exeter V40 Exeter X3 Rimfit                          | 5,262  | 0.96 | 0.57  | [ 0.23 , 0.92] | Inferior by $\geq 20\%$   | 0.001  |
| 33 | [MoP] Exeter V40 Furlong HAC CSF Plus                      | 504    | 0.35 | -0.04 | [-0.53 , 0.46] | Non-inferiority not shown | 0.882  |
| 34 | [MoP] Exeter V40 Marathon                                  | 1,300  | 1.05 | 0.66  | [ 0.15 , 1.18] | Inferior by $\geq 20\%$   | 0.012  |
| 35 | [MoP] Exeter V40 Opera                                     | 2,373  | 0.81 | 0.42  | [-0.03 , 0.88] | Non-inferiority not shown | 0.067  |
| 36 | [MoP] Exeter V40 Pinnacle                                  | 2,590  | 1.18 | 0.79  | [ 0.35 , 1.24] | Inferior by $\geq 20\%$   | <0.001 |
| 37 | [MoP] Exeter V40 R3 Cementless                             | 461    | 1.23 | 0.84  | [ 0.10 , 1.57] | Inferior by $\geq 20\%$   | 0.025  |
| 38 | [MoP] Exeter V40 Reflection Cementless                     | 2,035  | 1.12 | 0.73  | [ 0.19 , 1.26] | Inferior by $\geq 20\%$   | 0.007  |
| 39 | [MoP] Exeter V40 Trabecular Metal Modular Cementless Cup   | 411    | 1.22 | 0.83  | [-0.12 , 1.77] | Non-inferiority not shown | 0.086  |
| 40 | [MoP] Exeter V40 Trabecular Metal Natural Cup              | 318    | 3.43 | 3.04  | [ 1.11 , 4.97] | Inferior by $\geq 100\%$  | 0.002  |
| 41 | [MoP] Exeter V40 Trident                                   | 17,802 | 1.10 | 0.71  | [ 0.39 , 1.02] | Inferior by $\geq 20\%$   | <0.001 |
| 42 | [MoP] Exeter V40 Trilogy                                   | 8,482  | 0.92 | 0.53  | [ 0.19 , 0.88] | Inferior by $\geq 20\%$   | 0.003  |
| 43 | [MoP] Exeter V40 Tritanium                                 | 475    | 2.06 | 1.67  | [ 0.71 , 2.63] | Inferior by $\geq 100\%$  | 0.001  |
| 44 | [MoP] Exeter V40 Ultima Cemented Cup                       | 1,139  | 1.56 | 1.17  | [ 0.41 , 1.92] | Inferior by $\geq 100\%$  | 0.002  |
| 45 | [MoP] Exeter V40 ZCA                                       | 274    | 0.36 | -0.03 | [-0.79 , 0.73] | Non-inferiority not shown | 0.933  |
| 46 | [MoP] Furlong Cemented Stem JRI Cemented Cup               | 1,478  | 1.38 | 0.99  | [ 0.34 , 1.63] | Inferior by $\geq 20\%$   | 0.003  |

|    |                                                               |       |      |       |                |                           |        |
|----|---------------------------------------------------------------|-------|------|-------|----------------|---------------------------|--------|
| 1  | [MoP] Furlong HAC Stem CSF                                    | 6,640 | 2.07 | 1.68  | [ 1.25 , 2.11] | Inferior by $\geq 100\%$  | <0.001 |
| 2  | [MoP] Furlong HAC Stem Furlong HAC CSF Plus                   | 2,998 | 2.24 | 1.85  | [ 1.33 , 2.37] | Inferior by $\geq 100\%$  | <0.001 |
| 3  | [MoP] Furlong HAC Stem Furlong Threaded                       | 479   | 2.13 | 1.74  | [ 0.46 , 3.02] | Inferior by $\geq 100\%$  | 0.008  |
| 4  | [MoP] Furlong HAC Stem Trilogy                                | 341   | 1.90 | 1.51  | [ 0.09 , 2.94] | Inferior by $\geq 20\%$   | 0.038  |
| 5  | [MoP] M/L Taper Cementless Allofit                            | 543   | 1.27 | 0.88  | [ 0.00 , 1.76] | Non-inferiority not shown | 0.049  |
| 6  | [MoP] M/L Taper Cementless Continuum                          | 612   | 1.40 | 1.01  | [ 0.28 , 1.74] | Inferior by $\geq 20\%$   | 0.007  |
| 7  | [MoP] M/L Taper Cementless Trilogy                            | 475   | 2.08 | 1.69  | [ 0.63 , 2.74] | Inferior by $\geq 100\%$  | 0.002  |
| 8  | [MoP] M/L Taper Cementless Trilogy IT                         | 270   | 1.86 | 1.47  | [ 0.46 , 2.47] | Inferior by $\geq 100\%$  | 0.004  |
| 9  | [MoP] MS-30 Allofit                                           | 314   | 0.57 | 0.17  | [-0.66 , 1.01] | Non-inferiority not shown | 0.683  |
| 10 | [MoP] MS-30 Original ME Muller Low Profile Cup                | 756   | 0.58 | 0.19  | [-0.36 , 0.74] | Non-inferiority not shown | 0.497  |
| 11 | [MoP] Mem Original ME Muller Low Profile Cup                  | 337   | 0.56 | 0.17  | [-0.66 , 1.00] | Non-inferiority not shown | 0.688  |
| 12 | [MoP] Muller Straight Stem Centerpulse Muller                 | 502   | 0.95 | 0.56  | [-0.32 , 1.43] | Non-inferiority not shown | 0.213  |
| 13 | [MoP] Muller Straight Stem Original ME Muller Low Profile Cup | 1,412 | 0.81 | 0.41  | [-0.09 , 0.92] | Non-inferiority not shown | 0.106  |
| 14 | [MoP] Muller-Biomet Apollo                                    | 1,949 | 1.24 | 0.85  | [ 0.30 , 1.41] | Inferior by $\geq 20\%$   | 0.003  |
| 15 | [MoP] Muller-Biomet Original ME Muller Low Profile Cup        | 831   | 1.56 | 1.17  | [ 0.31 , 2.03] | Inferior by $\geq 20\%$   | 0.008  |
| 16 | [MoP] Omnifit Cemented Stem ODC                               | 880   | 1.40 | 1.01  | [ 0.20 , 1.82] | Inferior by $\geq 20\%$   | 0.015  |
| 17 | [MoP] Omnifit Cemented Stem Trident                           | 270   | 0.36 | -0.03 | [-0.80 , 0.74] | Non-inferiority not shown | 0.947  |
| 18 | [MoP] Omnifit Cementless Stem Secure Fit Cementless Cup       | 283   | 0.69 | 0.30  | [-0.70 , 1.30] | Non-inferiority not shown | 0.554  |
| 19 | [MoP] Omnifit Cementless Stem Trident                         | 426   | 3.34 | 2.95  | [ 1.31 , 4.58] | Inferior by $\geq 100\%$  | <0.001 |
| 20 | [MoP] P10 Muller Original ME Muller Low Profile Cup           | 415   | 0.96 | 0.57  | [-0.33 , 1.47] | Non-inferiority not shown | 0.213  |
| 21 | [MoP] Polarstem Cementless R3 Cementless                      | 1,068 | 0.96 | 0.57  | [ 0.14 , 1.00] | Inferior by $\geq 20\%$   | 0.010  |
| 22 | [MoP] SL-Plus Cementless Stem EP-Fit Plus                     | 2,023 | 2.60 | 2.21  | [ 1.52 , 2.90] | Inferior by $\geq 100\%$  | <0.001 |
| 23 | [MoP] SP II Cemented Stem Interplanta                         | 625   | 2.72 | 2.33  | [ 1.09 , 3.57] | Inferior by $\geq 100\%$  | <0.001 |
| 24 | [MoP] SP II Cemented Stem Link Flange Cup                     | 274   | 0.69 | 0.29  | [-0.70 , 1.29] | Non-inferiority not shown | 0.560  |
| 25 | [MoP] Spectron Reflection Cementless                          | 298   | 1.24 | 0.84  | [-0.39 , 2.08] | Non-inferiority not shown | 0.182  |
| 26 | [MoP] Stanmore Modular Stem Elite Plus Cemented Cup           | 534   | 0.35 | -0.05 | [-0.61 , 0.51] | Non-inferiority not shown | 0.872  |
| 27 | [MoP] Stanmore Modular Stem SHP Cup                           | 931   | 0.82 | 0.43  | [-0.18 , 1.03] | Non-inferiority not shown | 0.169  |
| 28 | [MoP] Stanmore Modular Stem Stanmore-Arcom Cup                | 3,798 | 1.09 | 0.70  | [ 0.27 , 1.12] | Inferior by $\geq 20\%$   | 0.001  |
| 29 | [MoP] Synergy Cementless Stem R3 Cementless                   | 1,057 | 1.25 | 0.86  | [ 0.31 , 1.41] | Inferior by $\geq 20\%$   | 0.002  |
| 30 | [MoP] Synergy Cementless Stem Reflection Cementless           | 1,449 | 0.87 | 0.47  | [-0.08 , 1.03] | Non-inferiority not shown | 0.092  |
| 31 | [MoP] Taperfit Cemented Stem Atlas IIIp                       | 444   | 0.84 | 0.45  | [-0.34 , 1.24] | Non-inferiority not shown | 0.268  |
| 32 | [MoP] Taperloc Cemented Stem Exceed ABT                       | 280   | 0.97 | 0.58  | [-0.21 , 1.38] | Non-inferiority not shown | 0.152  |
| 33 | [MoP] Taperloc Cementless Stem Exceed                         | 553   | 1.20 | 0.81  | [-0.12 , 1.73] | Non-inferiority not shown | 0.089  |
| 34 | [MoP] Taperloc Cementless Stem Exceed ABT                     | 3,732 | 1.75 | 1.36  | [ 0.91 , 1.80] | Inferior by $\geq 100\%$  | <0.001 |
| 35 | [MoP] Trilock BPS Pinnacle                                    | 264   | 1.65 | 1.26  | [ 0.01 , 2.51] | Non-inferiority not shown | 0.048  |
| 36 | [MoP] Trilock BPS Pinnacle Gription                           | 275   | 1.37 | 0.98  | [-0.19 , 2.15] | Non-inferiority not shown | 0.100  |
| 37 | [MoP] VerSys Cemented Stem Trilogy                            | 263   | 1.11 | 0.71  | [-0.56 , 1.99] | Non-inferiority not shown | 0.273  |
| 38 | [MoP] Versys Cementless Stem Trilogy                          | 860   | 4.01 | 3.62  | [ 2.32 , 4.91] | Inferior by $\geq 100\%$  | <0.001 |

**Supplementary table 1b: Difference in Kaplan-Meier failure estimate between a contemporary reference and implants with at least 250 at risk at 5 years since primary**

| Stem/cup brand                                                | Number at risk | Cumulative failure (%) | Difference in failure (%) | 95% CI         | Equivalence status        | p-value |
|---------------------------------------------------------------|----------------|------------------------|---------------------------|----------------|---------------------------|---------|
| [CoP] MS-30 Original ME Muller Low Profile Cup                | 1,125          | 0.55                   | [REFERENCE]               |                |                           |         |
| [CoC] ABG II Monolithic Cementless Stem ABG II Cementless Cup | 1,020          | 2.29                   | 1.73                      | [ 0.77 , 2.70] | Inferior by $\geq 100\%$  | <0.001  |
| [CoC] ABG II Monolithic Cementless Stem Trident               | 834            | 3.07                   | 2.51                      | [ 1.38 , 3.64] | Inferior by $\geq 100\%$  | <0.001  |
| [CoC] Accolade Trident                                        | 5,169          | 2.83                   | 2.27                      | [ 1.74 , 2.81] | Inferior by $\geq 100\%$  | <0.001  |
| [CoC] Bicontact Cementless Stem Plasmacup SC                  | 289            | 1.01                   | 0.46                      | [-0.60 , 1.51] | Non-inferiority not shown | 0.395   |
| [CoC] Bimetric Cementless Stem Exceed ABT                     | 627            | 1.80                   | 1.24                      | [ 0.31 , 2.17] | Inferior by $\geq 20\%$   | 0.009   |
| [CoC] C-Stem AMT Cemented Stem Pinnacle                       | 427            | 1.30                   | 0.74                      | [-0.10 , 1.59] | Non-inferiority not shown | 0.085   |
| [CoC] C-Stem Cemented Stem Pinnacle                           | 310            | 1.44                   | 0.88                      | [-0.42 , 2.19] | Non-inferiority not shown | 0.185   |
| [CoC] CPT Continuum                                           | 379            | 2.40                   | 1.85                      | [ 0.77 , 2.92] | Inferior by $\geq 100\%$  | 0.001   |
| [CoC] CPT Trilogy AB                                          | 468            | 1.70                   | 1.15                      | [-0.02 , 2.31] | Non-inferiority not shown | 0.053   |
| [CoC] Corail DeltaMotion                                      | 633            | 1.64                   | 1.08                      | [ 0.28 , 1.89] | Inferior by $\geq 20\%$   | 0.008   |
| [CoC] Corail Duraloc Option                                   | 1,014          | 2.99                   | 2.44                      | [ 1.35 , 3.52] | Inferior by $\geq 100\%$  | <0.001  |
| [CoC] Corail Pinnacle                                         | 17,510         | 2.40                   | 1.85                      | [ 1.44 , 2.26] | Inferior by $\geq 100\%$  | <0.001  |
| [CoC] Excia Cementless Plasmacup SC                           | 501            | 1.33                   | 0.77                      | [ 0.00 , 1.54] | Non-inferiority not shown | 0.049   |
| [CoC] Exeter V40 ABG II Cementless Cup                        | 1,138          | 1.20                   | 0.64                      | [-0.04 , 1.32] | Non-inferiority not shown | 0.063   |
| [CoC] Exeter V40 Trident                                      | 8,141          | 1.50                   | 0.94                      | [ 0.51 , 1.38] | Inferior by $\geq 20\%$   | <0.001  |
| [CoC] Furlong HAC Stem CSF                                    | 1,502          | 2.59                   | 2.03                      | [ 1.18 , 2.89] | Inferior by $\geq 100\%$  | <0.001  |
| [CoC] Furlong HAC Stem Furlong HAC CSF Plus                   | 5,470          | 1.84                   | 1.28                      | [ 0.84 , 1.73] | Inferior by $\geq 100\%$  | <0.001  |
| [CoC] Furlong HAC Stem Furlong Threaded                       | 318            | 3.01                   | 2.46                      | [ 0.58 , 4.34] | Inferior by $\geq 100\%$  | 0.010   |
| [CoC] M/L Taper Cementless Continuum                          | 607            | 1.71                   | 1.15                      | [ 0.46 , 1.85] | Inferior by $\geq 20\%$   | 0.001   |
| [CoC] Metafix Stem Trinity                                    | 280            | 1.52                   | 0.96                      | [ 0.14 , 1.79] | Inferior by $\geq 20\%$   | 0.022   |
| [CoC] Omnifit Cementless Stem Trident                         | 387            | 3.10                   | 2.54                      | [ 0.95 , 4.13] | Inferior by $\geq 100\%$  | 0.002   |
| [CoC] Polarstem Cementless R3 Cementless                      | 300            | 0.78                   | 0.22                      | [-0.40 , 0.85] | Non-inferiority not shown | 0.487   |
| [CoC] S-Rom Cementless Stem Pinnacle                          | 407            | 4.35                   | 3.79                      | [ 2.12 , 5.46] | Inferior by $\geq 100\%$  | <0.001  |
| [CoC] SL-Plus Cementless Stem EP-Fit Plus                     | 1,115          | 4.96                   | 4.40                      | [ 3.14 , 5.66] | Inferior by $\geq 100\%$  | <0.001  |
| [CoC] SPS Modular April - Ceramic                             | 321            | 2.99                   | 2.43                      | [ 0.95 , 3.92] | Inferior by $\geq 100\%$  | 0.001   |
| [CoC] Summit Cementless Stem Pinnacle                         | 385            | 1.33                   | 0.78                      | [-0.18 , 1.73] | Non-inferiority not shown | 0.110   |
| [CoC] Taperloc Cementless Stem Exceed ABT                     | 3,900          | 1.83                   | 1.27                      | [ 0.80 , 1.74] | Inferior by $\geq 100\%$  | <0.001  |
| [CoP] Accolade Trident                                        | 1,372          | 1.95                   | 1.39                      | [ 0.82 , 1.97] | Inferior by $\geq 100\%$  | <0.001  |
| [CoP] C-Stem Cemented Stem Elite Plus Ogee                    | 474            | 0.75                   | 0.20                      | [-0.56 , 0.96] | Non-inferiority not shown | 0.609   |
| [CoP] C-Stem Cemented Stem Marathon                           | 542            | 1.34                   | 0.79                      | [ 0.10 , 1.47] | Non-inferiority not shown | 0.024   |
| [CoP] C-Stem Cemented Stem Opera                              | 656            | 1.33                   | 0.77                      | [-0.12 , 1.67] | Non-inferiority not shown | 0.091   |
| [CoP] C-Stem Cemented Stem Wroblewski Golf Ball               | 738            | 1.05                   | 0.49                      | [-0.25 , 1.24] | Non-inferiority not shown | 0.196   |
| [CoP] CPT ZCA                                                 | 261            | 0.39                   | -0.17                     | [-0.82 , 0.48] | Non-inferiority not shown | 0.611   |
| [CoP] Corail Charnley and Elite Plus LPW                      | 532            | 1.89                   | 1.33                      | [ 0.25 , 2.42] | Inferior by $\geq 20\%$   | 0.016   |
| [CoP] Corail Duraloc Cementless Cup                           | 289            | 4.72                   | 4.17                      | [ 1.81 , 6.53] | Inferior by $\geq 100\%$  | 0.001   |
| [CoP] Corail Elite Plus Cemented Cup                          | 328            | 1.50                   | 0.95                      | [-0.24 , 2.13] | Non-inferiority not shown | 0.117   |
| [CoP] Corail Elite Plus Ogee                                  | 340            | 2.64                   | 2.08                      | [ 0.61 , 3.55] | Inferior by $\geq 100\%$  | 0.006   |
| [CoP] Corail Marathon                                         | 573            | 1.40                   | 0.84                      | [ 0.19 , 1.49] | Inferior by $\geq 20\%$   | 0.012   |
| [CoP] Corail Pinnacle                                         | 4,134          | 1.74                   | 1.18                      | [ 0.74 , 1.63] | Inferior by $\geq 100\%$  | <0.001  |

|    |                                                               |       |      |      |                |                           |        |
|----|---------------------------------------------------------------|-------|------|------|----------------|---------------------------|--------|
| 1  | [CoP] Corail Trilogy                                          | 592   | 1.61 | 1.06 | [ 0.04 , 2.07] | Non-inferiority not shown | 0.041  |
| 2  | [CoP] Exeter V40 Charnley and Elite Plus LPW                  | 433   | 2.02 | 1.47 | [ 0.38 , 2.55] | Inferior by $\geq 20\%$   | 0.008  |
| 3  | [CoP] Exeter V40 Elite Plus Ogee                              | 858   | 1.08 | 0.53 | [-0.14 , 1.20] | Non-inferiority not shown | 0.122  |
| 4  | [CoP] Exeter V40 Exeter Contemporary Flanged                  | 2,011 | 1.31 | 0.76 | [ 0.23 , 1.28] | Inferior by $\geq 20\%$   | 0.005  |
| 5  | [CoP] Exeter V40 Exeter Contemporary Hooded                   | 593   | 2.58 | 2.03 | [ 0.93 , 3.12] | Inferior by $\geq 100\%$  | <0.001 |
| 6  | [CoP] Exeter V40 Exeter Duration                              | 664   | 0.95 | 0.40 | [-0.36 , 1.16] | Non-inferiority not shown | 0.304  |
| 7  | [CoP] Exeter V40 Exeter X3 Rimfit                             | 363   | 1.16 | 0.60 | [ 0.09 , 1.12] | Non-inferiority not shown | 0.022  |
| 8  | [CoP] Exeter V40 Marathon                                     | 258   | 0.94 | 0.38 | [-0.44 , 1.21] | Non-inferiority not shown | 0.365  |
| 9  | [CoP] Exeter V40 Pinnacle                                     | 297   | 1.53 | 0.98 | [ 0.08 , 1.87] | Non-inferiority not shown | 0.032  |
| 10 | [CoP] Exeter V40 Trident                                      | 2,337 | 1.16 | 0.60 | [ 0.15 , 1.06] | Inferior by $\geq 20\%$   | 0.009  |
| 11 | [CoP] Exeter V40 Trilogy                                      | 1,627 | 1.31 | 0.76 | [ 0.15 , 1.37] | Inferior by $\geq 20\%$   | 0.015  |
| 12 | [CoP] Furlong HAC Stem CSF                                    | 5,425 | 1.65 | 1.09 | [ 0.61 , 1.57] | Inferior by $\geq 100\%$  | <0.001 |
| 13 | [CoP] Furlong HAC Stem Furlong HAC CSF Plus                   | 908   | 2.02 | 1.47 | [ 0.74 , 2.19] | Inferior by $\geq 100\%$  | <0.001 |
| 14 | [CoP] Furlong HAC Stem Furlong Threaded                       | 362   | 1.29 | 0.73 | [-0.45 , 1.91] | Non-inferiority not shown | 0.225  |
| 15 | [CoP] Muller Straight Stem Original ME Muller Low Profile Cup | 298   | 1.22 | 0.67 | [-0.38 , 1.71] | Non-inferiority not shown | 0.210  |
| 16 | [CoP] SL-Plus Cementless Stem Bicon-Plus                      | 558   | 4.05 | 3.50 | [ 1.93 , 5.07] | Inferior by $\geq 100\%$  | <0.001 |
| 17 | [CoP] SL-Plus Cementless Stem EP-Fit Plus                     | 810   | 3.41 | 2.86 | [ 1.65 , 4.06] | Inferior by $\geq 100\%$  | <0.001 |
| 18 | [CoP] Stanmore Modular Stem Stanmore-Arcom Cup                | 257   | 1.19 | 0.64 | [-0.46 , 1.74] | Non-inferiority not shown | 0.257  |
| 19 | [CoP] Taperloc Cementless Stem Exceed ABT                     | 775   | 1.43 | 0.87 | [ 0.26 , 1.49] | Inferior by $\geq 20\%$   | 0.006  |
| 20 | [CoP] Versys Cementless Stem Trilogy                          | 342   | 1.07 | 0.51 | [-0.59 , 1.61] | Non-inferiority not shown | 0.363  |
| 21 | [MoP] ABG II Monolithic Cementless Stem ABG II Cementless Cup | 419   | 1.92 | 1.37 | [ 0.07 , 2.66] | Non-inferiority not shown | 0.039  |
| 22 | [MoP] ABG II Monolithic Cementless Stem Trident               | 402   | 4.11 | 3.56 | [ 1.71 , 5.41] | Inferior by $\geq 100\%$  | <0.001 |
| 23 | [MoP] Accolade Trident                                        | 6,100 | 2.76 | 2.21 | [ 1.72 , 2.70] | Inferior by $\geq 100\%$  | <0.001 |
| 24 | [MoP] Anthology R3 Cementless                                 | 353   | 2.14 | 1.59 | [ 0.69 , 2.48] | Inferior by $\geq 100\%$  | <0.001 |
| 25 | [MoP] Bimetric Cementless Stem Mallory-Head Cementless Cup    | 271   | 2.05 | 1.50 | [ 0.23 , 2.76] | Inferior by $\geq 20\%$   | 0.020  |
| 26 | [MoP] C-Stem AMT Cemented Stem Charnley and Elite Plus LPW    | 1,397 | 1.46 | 0.90 | [ 0.30 , 1.51] | Inferior by $\geq 20\%$   | 0.003  |
| 27 | [MoP] C-Stem AMT Cemented Stem Elite Plus Cemented Cup        | 435   | 1.22 | 0.66 | [-0.26 , 1.58] | Non-inferiority not shown | 0.157  |
| 28 | [MoP] C-Stem AMT Cemented Stem Elite Plus Ogee                | 918   | 1.01 | 0.46 | [-0.13 , 1.05] | Non-inferiority not shown | 0.130  |
| 29 | [MoP] C-Stem AMT Cemented Stem Marathon                       | 356   | 1.46 | 0.90 | [ 0.10 , 1.71] | Non-inferiority not shown | 0.028  |
| 30 | [MoP] C-Stem AMT Cemented Stem Pinnacle                       | 657   | 1.85 | 1.29 | [ 0.56 , 2.02] | Inferior by $\geq 100\%$  | 0.001  |
| 31 | [MoP] C-Stem Cemented Stem Charnley Ogee                      | 680   | 1.86 | 1.30 | [ 0.34 , 2.26] | Inferior by $\geq 20\%$   | 0.008  |
| 32 | [MoP] C-Stem Cemented Stem Charnley and Elite Plus LPW        | 1,435 | 1.57 | 1.02 | [ 0.31 , 1.72] | Inferior by $\geq 20\%$   | 0.005  |
| 33 | [MoP] C-Stem Cemented Stem Duraloc Cementless Cup             | 496   | 2.67 | 2.12 | [ 0.73 , 3.50] | Inferior by $\geq 100\%$  | 0.003  |
| 34 | [MoP] C-Stem Cemented Stem Elite Plus Cemented Cup            | 586   | 0.90 | 0.34 | [-0.46 , 1.15] | Non-inferiority not shown | 0.405  |
| 35 | [MoP] C-Stem Cemented Stem Elite Plus Ogee                    | 2,459 | 1.13 | 0.57 | [ 0.06 , 1.08] | Non-inferiority not shown | 0.028  |
| 36 | [MoP] C-Stem Cemented Stem Marathon                           | 744   | 1.25 | 0.70 | [ 0.08 , 1.32] | Non-inferiority not shown | 0.028  |
| 37 | [MoP] C-Stem Cemented Stem Opera                              | 1,013 | 1.44 | 0.89 | [ 0.16 , 1.62] | Inferior by $\geq 20\%$   | 0.017  |
| 38 | [MoP] C-Stem Cemented Stem Pinnacle                           | 331   | 1.56 | 1.01 | [-0.13 , 2.14] | Non-inferiority not shown | 0.083  |
| 39 | [MoP] C-Stem Cemented Stem Polarcup Cementless                | 255   | 0.71 | 0.16 | [-0.89 , 1.21] | Non-inferiority not shown | 0.768  |
| 40 | [MoP] C-Stem Cemented Stem Trilogy                            | 338   | 0.82 | 0.26 | [-0.73 , 1.25] | Non-inferiority not shown | 0.606  |
| 41 | [MoP] C-Stem Cemented Stem Wroblewski Golf Ball               | 756   | 1.50 | 0.94 | [ 0.10 , 1.79] | Non-inferiority not shown | 0.028  |
| 42 | [MoP] CCA Cemented Stem CCB Cup                               | 738   | 0.79 | 0.23 | [-0.38 , 0.85] | Non-inferiority not shown | 0.459  |
| 43 | [MoP] CLS Cementless Stem Allofit                             | 553   | 2.90 | 2.34 | [ 1.01 , 3.68] | Inferior by $\geq 100\%$  | 0.001  |
| 44 | [MoP] CLS Cementless Stem Trilogy                             | 419   | 3.18 | 2.63 | [ 1.17 , 4.09] | Inferior by $\geq 100\%$  | <0.001 |
| 45 | [MoP] CMK Modular Cemented Stem CMK Cemented Cup              | 418   | 1.08 | 0.52 | [-0.49 , 1.53] | Non-inferiority not shown | 0.310  |
| 46 | [MoP] CPCS Opera                                              | 866   | 1.28 | 0.72 | [-0.02 , 1.46] | Non-inferiority not shown | 0.056  |

|    |                                                            |        |      |       |                |                           |        |
|----|------------------------------------------------------------|--------|------|-------|----------------|---------------------------|--------|
| 1  | [MoP] CPCS Polarcup Cementless                             | 368    | 0.99 | 0.43  | [-0.60 , 1.46] | Non-inferiority not shown | 0.410  |
| 2  | [MoP] CPS Plus Cenator Cemented Cup                        | 339    | 0.80 | 0.25  | [-0.73 , 1.23] | Non-inferiority not shown | 0.618  |
| 3  | [MoP] CPS Plus EP-Fit Plus                                 | 282    | 3.23 | 2.68  | [ 0.67 , 4.69] | Inferior by $\geq 100\%$  | 0.009  |
| 4  | [MoP] CPS Plus Opera                                       | 464    | 2.16 | 1.61  | [ 0.29 , 2.92] | Inferior by $\geq 20\%$   | 0.017  |
| 5  | [MoP] CPT Allofit                                          | 430    | 0.94 | 0.39  | [-0.41 , 1.18] | Non-inferiority not shown | 0.339  |
| 6  | [MoP] CPT Elite Plus Ogee                                  | 1,744  | 1.87 | 1.32  | [ 0.67 , 1.97] | Inferior by $\geq 100\%$  | <0.001 |
| 7  | [MoP] CPT Exceed                                           | 263    | 4.10 | 3.55  | [ 1.24 , 5.85] | Inferior by $\geq 100\%$  | 0.003  |
| 8  | [MoP] CPT Opera                                            | 378    | 2.17 | 1.62  | [ 0.16 , 3.07] | Inferior by $\geq 20\%$   | 0.029  |
| 9  | [MoP] CPT Original ME Muller Low Profile Cup               | 422    | 2.20 | 1.64  | [ 0.54 , 2.75] | Inferior by $\geq 20\%$   | 0.004  |
| 10 | [MoP] CPT Pinnacle                                         | 639    | 2.42 | 1.86  | [ 0.72 , 3.00] | Inferior by $\geq 100\%$  | 0.001  |
| 11 | [MoP] CPT Trabecular Metal Modular Cementless Cup          | 523    | 2.41 | 1.85  | [ 0.82 , 2.89] | Inferior by $\geq 100\%$  | <0.001 |
| 12 | [MoP] CPT Trilogy                                          | 5,765  | 2.20 | 1.65  | [ 1.17 , 2.12] | Inferior by $\geq 100\%$  | <0.001 |
| 13 | [MoP] CPT ZCA                                              | 5,547  | 2.11 | 1.55  | [ 1.07 , 2.03] | Inferior by $\geq 100\%$  | <0.001 |
| 14 | [MoP] Centrament Chirulen                                  | 310    | 1.12 | 0.57  | [-0.59 , 1.72] | Non-inferiority not shown | 0.337  |
| 15 | [MoP] Charnley Cemented Stem Charnley Cemented Cup         | 3,601  | 1.72 | 1.17  | [ 0.63 , 1.71] | Inferior by $\geq 100\%$  | <0.001 |
| 16 | [MoP] Charnley Cemented Stem Charnley Ogee                 | 7,533  | 1.88 | 1.33  | [ 0.86 , 1.79] | Inferior by $\geq 100\%$  | <0.001 |
| 17 | [MoP] Charnley Cemented Stem Charnley and Elite Plus LPW   | 5,041  | 1.12 | 0.56  | [ 0.11 , 1.02] | Non-inferiority not shown | 0.015  |
| 18 | [MoP] Charnley Cemented Stem Opera                         | 1,039  | 1.46 | 0.91  | [ 0.14 , 1.67] | Inferior by $\geq 20\%$   | 0.020  |
| 19 | [MoP] Charnley Cemented Stem Wroblewski Golf Ball          | 797    | 1.74 | 1.18  | [ 0.30 , 2.06] | Inferior by $\geq 20\%$   | 0.008  |
| 20 | [MoP] Charnley Modular Charnley and Elite Plus LPW         | 277    | 0.27 | -0.28 | [-0.93 , 0.37] | Non-inferiority not shown | 0.393  |
| 21 | [MoP] Corail Charnley and Elite Plus LPW                   | 448    | 1.85 | 1.30  | [ 0.30 , 2.29] | Inferior by $\geq 20\%$   | 0.010  |
| 22 | [MoP] Corail Duraloc Cementless Cup                        | 3,226  | 2.27 | 1.71  | [ 1.10 , 2.33] | Inferior by $\geq 100\%$  | <0.001 |
| 23 | [MoP] Corail Elite Plus Cemented Cup                       | 727    | 1.31 | 0.75  | [-0.05 , 1.56] | Non-inferiority not shown | 0.067  |
| 24 | [MoP] Corail Elite Plus Ogee                               | 1,029  | 1.70 | 1.14  | [ 0.41 , 1.88] | Inferior by $\geq 20\%$   | 0.002  |
| 25 | [MoP] Corail Exeter Contemporary Flanged                   | 328    | 1.35 | 0.79  | [-0.14 , 1.72] | Non-inferiority not shown | 0.095  |
| 26 | [MoP] Corail Marathon                                      | 1,385  | 1.23 | 0.67  | [ 0.17 , 1.18] | Inferior by $\geq 20\%$   | 0.009  |
| 27 | [MoP] Corail Pinnacle                                      | 16,408 | 1.70 | 1.15  | [ 0.76 , 1.54] | Inferior by $\geq 100\%$  | <0.001 |
| 28 | [MoP] Corail Trilogy                                       | 1,383  | 1.72 | 1.17  | [ 0.47 , 1.87] | Inferior by $\geq 20\%$   | 0.001  |
| 29 | [MoP] Elite Plus Cemented Stem Charnley and Elite Plus LPW | 308    | 1.66 | 1.11  | [-0.26 , 2.47] | Non-inferiority not shown | 0.113  |
| 30 | [MoP] Elite Plus Cemented Stem Elite Plus Ogee             | 519    | 1.06 | 0.50  | [-0.42 , 1.42] | Non-inferiority not shown | 0.284  |
| 31 | [MoP] Exeter Elite Plus Ogee                               | 259    | 0.71 | 0.15  | [-0.89 , 1.20] | Non-inferiority not shown | 0.775  |
| 32 | [MoP] Exeter V40 ABG II Cementless Cup                     | 693    | 1.56 | 1.00  | [ 0.05 , 1.95] | Non-inferiority not shown | 0.038  |
| 33 | [MoP] Exeter V40 Cenator Cemented Cup                      | 1,725  | 1.99 | 1.44  | [ 0.75 , 2.12] | Inferior by $\geq 100\%$  | <0.001 |
| 34 | [MoP] Exeter V40 Charnley Cemented Cup                     | 286    | 0.87 | 0.32  | [-0.73 , 1.37] | Non-inferiority not shown | 0.553  |
| 35 | [MoP] Exeter V40 Charnley Ogee                             | 1,113  | 1.44 | 0.88  | [ 0.15 , 1.61] | Inferior by $\geq 20\%$   | 0.018  |
| 36 | [MoP] Exeter V40 Charnley and Elite Plus LPW               | 1,812  | 1.47 | 0.91  | [ 0.34 , 1.48] | Inferior by $\geq 20\%$   | 0.002  |
| 37 | [MoP] Exeter V40 Duraloc Cementless Cup                    | 1,000  | 2.04 | 1.48  | [ 0.56 , 2.40] | Inferior by $\geq 100\%$  | 0.002  |
| 38 | [MoP] Exeter V40 EP-Fit Plus                               | 496    | 2.56 | 2.01  | [ 0.63 , 3.38] | Inferior by $\geq 100\%$  | 0.004  |
| 39 | [MoP] Exeter V40 Elite Plus Cemented Cup                   | 2,674  | 0.76 | 0.21  | [-0.25 , 0.66] | Non-inferiority not shown | 0.376  |
| 40 | [MoP] Exeter V40 Elite Plus Ogee                           | 12,458 | 1.11 | 0.56  | [ 0.16 , 0.96] | Inferior by $\geq 20\%$   | 0.006  |
| 41 | [MoP] Exeter V40 Exceed                                    | 375    | 0.94 | 0.39  | [-0.51 , 1.29] | Non-inferiority not shown | 0.399  |
| 42 | [MoP] Exeter V40 Exceed ABT                                | 305    | 1.17 | 0.62  | [-0.43 , 1.67] | Non-inferiority not shown | 0.251  |
| 43 | [MoP] Exeter V40 Exeter Contemporary Flanged               | 26,691 | 1.21 | 0.65  | [ 0.27 , 1.03] | Inferior by $\geq 20\%$   | 0.001  |
| 44 | [MoP] Exeter V40 Exeter Contemporary Hooded                | 11,227 | 2.10 | 1.54  | [ 1.12 , 1.96] | Inferior by $\geq 100\%$  | <0.001 |
| 45 | [MoP] Exeter V40 Exeter Duration                           | 10,271 | 1.70 | 1.15  | [ 0.72 , 1.57] | Inferior by $\geq 100\%$  | <0.001 |
| 46 | [MoP] Exeter V40 Exeter X3 Rimfit                          | 859    | 1.16 | 0.61  | [ 0.14 , 1.07] | Inferior by $\geq 20\%$   | 0.010  |

|    |                                                               |        |      |      |                |                           |        |
|----|---------------------------------------------------------------|--------|------|------|----------------|---------------------------|--------|
| 1  | [MoP] Exeter V40 Marathon                                     | 555    | 1.54 | 0.99 | [ 0.24 , 1.73] | Inferior by $\geq 20\%$   | 0.010  |
| 2  | [MoP] Exeter V40 Opera                                        | 1,734  | 1.18 | 0.63 | [ 0.06 , 1.19] | Non-inferiority not shown | 0.030  |
| 3  | [MoP] Exeter V40 Pinnacle                                     | 1,546  | 1.60 | 1.05 | [ 0.48 , 1.62] | Inferior by $\geq 20\%$   | <0.001 |
| 4  | [MoP] Exeter V40 Reflection Cementless                        | 1,812  | 1.58 | 1.02 | [ 0.37 , 1.67] | Inferior by $\geq 20\%$   | 0.002  |
| 5  | [MoP] Exeter V40 Trabecular Metal Modular Cementless Cup      | 276    | 2.23 | 1.68 | [ 0.19 , 3.17] | Inferior by $\geq 20\%$   | 0.028  |
| 6  | [MoP] Exeter V40 Trabecular Metal Natural Cup                 | 284    | 4.06 | 3.51 | [ 1.39 , 5.63] | Inferior by $\geq 100\%$  | 0.001  |
| 7  | [MoP] Exeter V40 Trident                                      | 10,507 | 1.44 | 0.88 | [ 0.48 , 1.29] | Inferior by $\geq 20\%$   | <0.001 |
| 8  | [MoP] Exeter V40 Trilogy                                      | 6,611  | 1.33 | 0.77 | [ 0.34 , 1.21] | Inferior by $\geq 20\%$   | 0.001  |
| 9  | [MoP] Exeter V40 Ultima Cemented Cup                          | 1,040  | 2.19 | 1.64 | [ 0.73 , 2.55] | Inferior by $\geq 100\%$  | <0.001 |
| 10 | [MoP] Furlong Cemented Stem JRI Cemented Cup                  | 1,287  | 1.66 | 1.11 | [ 0.37 , 1.84] | Inferior by $\geq 20\%$   | 0.003  |
| 11 | [MoP] Furlong HAC Stem CSF                                    | 5,416  | 2.43 | 1.87 | [ 1.36 , 2.38] | Inferior by $\geq 100\%$  | <0.001 |
| 12 | [MoP] Furlong HAC Stem Furlong HAC CSF Plus                   | 1,808  | 2.91 | 2.35 | [ 1.70 , 3.01] | Inferior by $\geq 100\%$  | <0.001 |
| 13 | [MoP] Furlong HAC Stem Furlong Threaded                       | 416    | 3.01 | 2.46 | [ 0.91 , 4.00] | Inferior by $\geq 100\%$  | 0.002  |
| 14 | [MoP] Furlong HAC Stem Trilogy                                | 264    | 1.90 | 1.35 | [-0.10 , 2.80] | Non-inferiority not shown | 0.067  |
| 15 | [MoP] M/L Taper Cementless Allofit                            | 295    | 2.04 | 1.48 | [ 0.22 , 2.74] | Inferior by $\geq 20\%$   | 0.021  |
| 16 | [MoP] M/L Taper Cementless Trilogy                            | 328    | 2.54 | 1.98 | [ 0.73 , 3.23] | Inferior by $\geq 100\%$  | 0.002  |
| 17 | [MoP] MS-30 Allofit                                           | 269    | 0.57 | 0.01 | [-0.85 , 0.87] | Non-inferiority not shown | 0.981  |
| 18 | [MoP] MS-30 Original ME Muller Low Profile Cup                | 531    | 1.23 | 0.67 | [-0.19 , 1.54] | Non-inferiority not shown | 0.128  |
| 19 | [MoP] Mem Original ME Muller Low Profile Cup                  | 313    | 0.86 | 0.30 | [-0.73 , 1.34] | Non-inferiority not shown | 0.567  |
| 20 | [MoP] Muller Straight Stem Centerpulse Muller                 | 442    | 1.79 | 1.24 | [ 0.02 , 2.46] | Non-inferiority not shown | 0.047  |
| 21 | [MoP] Muller Straight Stem Original ME Muller Low Profile Cup | 1,008  | 1.12 | 0.56 | [-0.07 , 1.19] | Non-inferiority not shown | 0.080  |
| 22 | [MoP] Muller-Biomet Apollo                                    | 1,539  | 1.41 | 0.86 | [ 0.23 , 1.49] | Inferior by $\geq 20\%$   | 0.008  |
| 23 | [MoP] Muller-Biomet Original ME Muller Low Profile Cup        | 512    | 1.96 | 1.41 | [ 0.41 , 2.40] | Inferior by $\geq 20\%$   | 0.006  |
| 24 | [MoP] Omnifit Cemented Stem ODC                               | 801    | 1.98 | 1.43 | [ 0.45 , 2.41] | Inferior by $\geq 20\%$   | 0.004  |
| 25 | [MoP] Omnifit Cemented Stem Trident                           | 250    | 1.89 | 1.34 | [-0.35 , 3.02] | Non-inferiority not shown | 0.120  |
| 26 | [MoP] Omnifit Cementless Stem Secure Fit Cementless Cup       | 275    | 0.69 | 0.14 | [-0.89 , 1.16] | Non-inferiority not shown | 0.791  |
| 27 | [MoP] Omnifit Cementless Stem Trident                         | 385    | 5.46 | 4.90 | [ 2.78 , 7.02] | Inferior by $\geq 100\%$  | <0.001 |
| 28 | [MoP] P10 Muller Original ME Muller Low Profile Cup           | 293    | 0.96 | 0.41 | [-0.52 , 1.34] | Non-inferiority not shown | 0.388  |
| 29 | [MoP] SL-Plus Cementless Stem EP-Fit Plus                     | 1,651  | 3.51 | 2.96 | [ 2.12 , 3.80] | Inferior by $\geq 100\%$  | <0.001 |
| 30 | [MoP] SP II Cemented Stem Interplanta                         | 552    | 3.23 | 2.67 | [ 1.29 , 4.05] | Inferior by $\geq 100\%$  | <0.001 |
| 31 | [MoP] Spectron Reflection Cementless                          | 267    | 1.24 | 0.68 | [-0.58 , 1.94] | Non-inferiority not shown | 0.289  |
| 32 | [MoP] Stanmore Modular Stem Elite Plus Cemented Cup           | 406    | 0.98 | 0.42 | [-0.51 , 1.36] | Non-inferiority not shown | 0.375  |
| 33 | [MoP] Stanmore Modular Stem SHP Cup                           | 677    | 0.95 | 0.40 | [-0.30 , 1.10] | Non-inferiority not shown | 0.265  |
| 34 | [MoP] Stanmore Modular Stem Stanmore-Arcom Cup                | 2,920  | 1.62 | 1.06 | [ 0.52 , 1.60] | Inferior by $\geq 20\%$   | <0.001 |
| 35 | [MoP] Synergy Cementless Stem Reflection Cementless           | 1,370  | 1.43 | 0.87 | [ 0.16 , 1.59] | Inferior by $\geq 20\%$   | 0.016  |
| 36 | [MoP] Taperfit Cemented Stem Atlas IIIp                       | 250    | 2.18 | 1.63 | [ 0.20 , 3.06] | Inferior by $\geq 20\%$   | 0.026  |
| 37 | [MoP] Taperloc Cementless Stem Exceed                         | 470    | 1.57 | 1.01 | [-0.07 , 2.10] | Non-inferiority not shown | 0.066  |
| 38 | [MoP] Taperloc Cementless Stem Exceed ABT                     | 1,793  | 2.07 | 1.52 | [ 0.98 , 2.06] | Inferior by $\geq 100\%$  | <0.001 |
| 39 | [MoP] Versys Cementless Stem Trilogy                          | 797    | 4.81 | 4.26 | [ 2.82 , 5.69] | Inferior by $\geq 100\%$  | <0.001 |



**Supplementary table 1c: Difference in Kaplan-Meier failure estimate between a contemporary reference and implants with at least 250 at risk at 7 years since primary**

| Stem/cup brand                                                | Number at risk | Cumulative failure (%) | Difference in failure (%) | 95% CI         | Equivalence status        | p-value |
|---------------------------------------------------------------|----------------|------------------------|---------------------------|----------------|---------------------------|---------|
| [MoP] Exeter V40 Elite Plus Cemented Cup                      | 1,773          | 0.91                   | [REFERENCE]               |                |                           |         |
| [CoC] ABG II Monolithic Cementless Stem ABG II Cementless Cup | 909            | 3.09                   | 2.19                      | [ 1.10 , 3.27] | Inferior by $\geq 100\%$  | <0.001  |
| [CoC] ABG II Monolithic Cementless Stem Trident               | 705            | 3.68                   | 2.77                      | [ 1.55 , 4.00] | Inferior by $\geq 100\%$  | <0.001  |
| [CoC] Accolade Trident                                        | 2,978          | 3.31                   | 2.40                      | [ 1.86 , 2.95] | Inferior by $\geq 100\%$  | <0.001  |
| [CoC] C-Stem Cemented Stem Pinnacle                           | 286            | 1.44                   | 0.53                      | [-0.76 , 1.82] | Non-inferiority not shown | 0.420   |
| [CoC] CPT Trilogy AB                                          | 265            | 1.93                   | 1.03                      | [-0.20 , 2.26] | Non-inferiority not shown | 0.101   |
| [CoC] Corail Duraloc Option                                   | 819            | 3.61                   | 2.71                      | [ 1.54 , 3.88] | Inferior by $\geq 100\%$  | <0.001  |
| [CoC] Corail Pinnacle                                         | 7,589          | 2.93                   | 2.03                      | [ 1.65 , 2.40] | Inferior by $\geq 100\%$  | <0.001  |
| [CoC] Exeter V40 ABG II Cementless Cup                        | 918            | 1.69                   | 0.79                      | [ 0.01 , 1.57] | Non-inferiority not shown | 0.048   |
| [CoC] Exeter V40 Trident                                      | 5,732          | 1.99                   | 1.09                      | [ 0.67 , 1.51] | Inferior by $\geq 20\%$   | <0.001  |
| [CoC] Furlong HAC Stem CSF                                    | 1,405          | 3.19                   | 2.29                      | [ 1.37 , 3.21] | Inferior by $\geq 100\%$  | <0.001  |
| [CoC] Furlong HAC Stem Furlong HAC CSF Plus                   | 2,083          | 2.15                   | 1.25                      | [ 0.81 , 1.69] | Inferior by $\geq 20\%$   | <0.001  |
| [CoC] Furlong HAC Stem Furlong Threaded                       | 308            | 4.24                   | 3.34                      | [ 1.14 , 5.53] | Inferior by $\geq 100\%$  | 0.003   |
| [CoC] Omnifit Cementless Stem Trident                         | 313            | 4.21                   | 3.31                      | [ 1.41 , 5.21] | Inferior by $\geq 100\%$  | 0.001   |
| [CoC] SL-Plus Cementless Stem EP-Fit Plus                     | 968            | 5.32                   | 4.41                      | [ 3.12 , 5.70] | Inferior by $\geq 100\%$  | <0.001  |
| [CoC] Summit Cementless Stem Pinnacle                         | 301            | 1.60                   | 0.69                      | [-0.37 , 1.76] | Non-inferiority not shown | 0.203   |
| [CoC] Taperloc Cementless Stem Exceed ABT                     | 1,609          | 2.02                   | 1.12                      | [ 0.65 , 1.58] | Inferior by $\geq 20\%$   | <0.001  |
| [CoP] Accolade Trident                                        | 544            | 2.20                   | 1.29                      | [ 0.64 , 1.95] | Inferior by $\geq 20\%$   | <0.001  |
| [CoP] C-Stem Cemented Stem Elite Plus Ogee                    | 342            | 0.75                   | -0.15                     | [-0.89 , 0.58] | Non-inferiority not shown | 0.684   |
| [CoP] C-Stem Cemented Stem Opera                              | 478            | 1.69                   | 0.79                      | [-0.22 , 1.80] | Non-inferiority not shown | 0.127   |
| [CoP] C-Stem Cemented Stem Wroblewski Golf Ball               | 598            | 1.67                   | 0.76                      | [-0.18 , 1.70] | Non-inferiority not shown | 0.112   |
| [CoP] Corail Charnley and Elite Plus LPW                      | 335            | 2.49                   | 1.59                      | [ 0.32 , 2.85] | Inferior by $\geq 20\%$   | 0.014   |
| [CoP] Corail Duraloc Cementless Cup                           | 266            | 5.06                   | 4.15                      | [ 1.72 , 6.59] | Inferior by $\geq 100\%$  | 0.001   |
| [CoP] Corail Pinnacle                                         | 1,638          | 2.16                   | 1.25                      | [ 0.78 , 1.73] | Inferior by $\geq 20\%$   | <0.001  |
| [CoP] Corail Trilogy                                          | 477            | 1.61                   | 0.71                      | [-0.29 , 1.71] | Non-inferiority not shown | 0.164   |
| [CoP] Exeter V40 Charnley and Elite Plus LPW                  | 250            | 2.02                   | 1.12                      | [ 0.05 , 2.19] | Non-inferiority not shown | 0.040   |
| [CoP] Exeter V40 Elite Plus Ogee                              | 535            | 1.35                   | 0.44                      | [-0.29 , 1.18] | Non-inferiority not shown | 0.240   |
| [CoP] Exeter V40 Exeter Contemporary Flanged                  | 1,110          | 1.42                   | 0.52                      | [ 0.00 , 1.03] | Non-inferiority not shown | 0.048   |
| [CoP] Exeter V40 Exeter Contemporary Hooded                   | 410            | 3.14                   | 2.23                      | [ 0.98 , 3.48] | Inferior by $\geq 100\%$  | <0.001  |
| [CoP] Exeter V40 Exeter Duration                              | 500            | 2.11                   | 1.21                      | [ 0.08 , 2.33] | Non-inferiority not shown | 0.035   |
| [CoP] Exeter V40 Trident                                      | 1,113          | 1.46                   | 0.56                      | [ 0.07 , 1.05] | Non-inferiority not shown | 0.026   |
| [CoP] Exeter V40 Trilogy                                      | 1,159          | 1.58                   | 0.67                      | [ 0.04 , 1.30] | Non-inferiority not shown | 0.037   |
| [CoP] Furlong HAC Stem CSF                                    | 4,459          | 2.07                   | 1.16                      | [ 0.69 , 1.64] | Inferior by $\geq 20\%$   | <0.001  |
| [CoP] Furlong HAC Stem Furlong HAC CSF Plus                   | 345            | 2.46                   | 1.55                      | [ 0.69 , 2.41] | Inferior by $\geq 20\%$   | <0.001  |
| [CoP] Furlong HAC Stem Furlong Threaded                       | 327            | 1.84                   | 0.94                      | [-0.45 , 2.33] | Non-inferiority not shown | 0.187   |
| [CoP] MS-30 Original ME Muller Low Profile Cup                | 675            | 0.70                   | -0.21                     | [-0.77 , 0.35] | Non-inferiority not shown | 0.460   |
| [CoP] SL-Plus Cementless Stem Bicon-Plus                      | 406            | 4.66                   | 3.75                      | [ 2.06 , 5.45] | Inferior by $\geq 100\%$  | <0.001  |
| [CoP] SL-Plus Cementless Stem EP-Fit Plus                     | 579            | 4.10                   | 3.20                      | [ 1.87 , 4.53] | Inferior by $\geq 100\%$  | <0.001  |
| [CoP] Versys Cementless Stem Trilogy                          | 303            | 1.36                   | 0.46                      | [-0.77 , 1.69] | Non-inferiority not shown | 0.465   |
| [MoP] ABG II Monolithic Cementless Stem ABG II Cementless Cup | 376            | 2.40                   | 1.50                      | [ 0.06 , 2.94] | Non-inferiority not shown | 0.041   |

|    |                                                            |       |      |       |                |                           |        |
|----|------------------------------------------------------------|-------|------|-------|----------------|---------------------------|--------|
| 1  | [MoP] ABG II Monolithic Cementless Stem Trident            | 301   | 5.72 | 4.81  | [ 2.60 , 7.02] | Inferior by $\geq 100\%$  | <0.001 |
| 2  | [MoP] Accolade Trident                                     | 2,764 | 3.50 | 2.59  | [ 2.07 , 3.11] | Inferior by $\geq 100\%$  | <0.001 |
| 3  | [MoP] C-Stem AMT Cemented Stem Charnley and Elite Plus LPW | 782   | 1.81 | 0.91  | [ 0.21 , 1.61] | Inferior by $\geq 20\%$   | 0.011  |
| 4  | [MoP] C-Stem AMT Cemented Stem Elite Plus Ogee             | 523   | 1.71 | 0.81  | [-0.02 , 1.64] | Non-inferiority not shown | 0.057  |
| 5  | [MoP] C-Stem AMT Cemented Stem Pinnacle                    | 298   | 2.08 | 1.18  | [ 0.34 , 2.02] | Inferior by $\geq 20\%$   | 0.006  |
| 6  | [MoP] C-Stem Cemented Stem Charnley Ogee                   | 539   | 2.03 | 1.12  | [ 0.12 , 2.12] | Non-inferiority not shown | 0.028  |
| 7  | [MoP] C-Stem Cemented Stem Charnley and Elite Plus LPW     | 1,298 | 1.94 | 1.04  | [ 0.29 , 1.79] | Inferior by $\geq 20\%$   | 0.007  |
| 8  | [MoP] C-Stem Cemented Stem Duraloc Cementless Cup          | 391   | 3.73 | 2.83  | [ 1.18 , 4.47] | Inferior by $\geq 100\%$  | 0.001  |
| 9  | [MoP] C-Stem Cemented Stem Elite Plus Cemented Cup         | 472   | 1.62 | 0.71  | [-0.34 , 1.76] | Non-inferiority not shown | 0.184  |
| 10 | [MoP] C-Stem Cemented Stem Elite Plus Ogee                 | 1,851 | 1.55 | 0.65  | [ 0.10 , 1.19] | Non-inferiority not shown | 0.020  |
| 11 | [MoP] C-Stem Cemented Stem Opera                           | 744   | 2.01 | 1.10  | [ 0.24 , 1.96] | Inferior by $\geq 20\%$   | 0.012  |
| 12 | [MoP] C-Stem Cemented Stem Pinnacle                        | 258   | 1.94 | 1.04  | [-0.30 , 2.38] | Non-inferiority not shown | 0.130  |
| 13 | [MoP] C-Stem Cemented Stem Trilogy                         | 278   | 1.11 | 0.21  | [-0.92 , 1.34] | Non-inferiority not shown | 0.719  |
| 14 | [MoP] C-Stem Cemented Stem Wroblewski Golf Ball            | 502   | 1.88 | 0.97  | [ 0.00 , 1.94] | Non-inferiority not shown | 0.050  |
| 15 | [MoP] CCA Cemented Stem CCB Cup                            | 328   | 1.69 | 0.78  | [-0.20 , 1.77] | Non-inferiority not shown | 0.119  |
| 16 | [MoP] CLS Cementless Stem Allofit                          | 350   | 3.77 | 2.87  | [ 1.30 , 4.44] | Inferior by $\geq 100\%$  | <0.001 |
| 17 | [MoP] CMK Modular Cemented Stem CMK Cemented Cup           | 329   | 1.08 | 0.17  | [-0.82 , 1.16] | Non-inferiority not shown | 0.734  |
| 18 | [MoP] CPCS Opera                                           | 324   | 2.86 | 1.95  | [ 0.78 , 3.12] | Inferior by $\geq 20\%$   | 0.001  |
| 19 | [MoP] CPS Plus Cenator Cemented Cup                        | 250   | 0.80 | -0.10 | [-1.06 , 0.86] | Non-inferiority not shown | 0.836  |
| 20 | [MoP] CPS Plus Opera                                       | 421   | 3.49 | 2.58  | [ 0.92 , 4.25] | Inferior by $\geq 100\%$  | 0.002  |
| 21 | [MoP] CPT Elite Plus Ogee                                  | 1,177 | 2.37 | 1.47  | [ 0.75 , 2.19] | Inferior by $\geq 20\%$   | <0.001 |
| 22 | [MoP] CPT Opera                                            | 276   | 3.01 | 2.11  | [ 0.39 , 3.82] | Inferior by $\geq 20\%$   | 0.016  |
| 23 | [MoP] CPT Trabecular Metal Modular Cementless Cup          | 270   | 3.00 | 2.09  | [ 0.78 , 3.40] | Inferior by $\geq 20\%$   | 0.002  |
| 24 | [MoP] CPT Trilogy                                          | 3,606 | 2.69 | 1.78  | [ 1.31 , 2.26] | Inferior by $\geq 100\%$  | <0.001 |
| 25 | [MoP] CPT ZCA                                              | 3,619 | 2.69 | 1.78  | [ 1.30 , 2.27] | Inferior by $\geq 100\%$  | <0.001 |
| 26 | [MoP] Centrament Chirulen                                  | 257   | 1.12 | 0.22  | [-0.93 , 1.36] | Non-inferiority not shown | 0.710  |
| 27 | [MoP] Charnley Cemented Stem Charnley Cemented Cup         | 3,004 | 2.31 | 1.41  | [ 0.84 , 1.97] | Inferior by $\geq 20\%$   | <0.001 |
| 28 | [MoP] Charnley Cemented Stem Charnley Ogee                 | 5,956 | 2.49 | 1.58  | [ 1.13 , 2.04] | Inferior by $\geq 100\%$  | <0.001 |
| 29 | [MoP] Charnley Cemented Stem Charnley and Elite Plus LPW   | 4,036 | 1.51 | 0.60  | [ 0.15 , 1.05] | Non-inferiority not shown | 0.009  |
| 30 | [MoP] Charnley Cemented Stem Opera                         | 733   | 2.08 | 1.18  | [ 0.29 , 2.07] | Inferior by $\geq 20\%$   | 0.009  |
| 31 | [MoP] Charnley Cemented Stem Wroblewski Golf Ball          | 659   | 1.87 | 0.96  | [ 0.07 , 1.86] | Non-inferiority not shown | 0.035  |
| 32 | [MoP] Corail Duraloc Cementless Cup                        | 2,661 | 3.39 | 2.48  | [ 1.79 , 3.18] | Inferior by $\geq 100\%$  | <0.001 |
| 33 | [MoP] Corail Elite Plus Cemented Cup                       | 467   | 1.82 | 0.91  | [-0.06 , 1.88] | Non-inferiority not shown | 0.065  |
| 34 | [MoP] Corail Elite Plus Ogee                               | 696   | 1.83 | 0.92  | [ 0.17 , 1.68] | Non-inferiority not shown | 0.016  |
| 35 | [MoP] Corail Marathon                                      | 354   | 1.49 | 0.59  | [ 0.03 , 1.15] | Non-inferiority not shown | 0.038  |
| 36 | [MoP] Corail Pinnacle                                      | 7,798 | 2.17 | 1.26  | [ 0.90 , 1.63] | Inferior by $\geq 20\%$   | <0.001 |
| 37 | [MoP] Corail Trilogy                                       | 855   | 2.65 | 1.75  | [ 0.86 , 2.63] | Inferior by $\geq 20\%$   | <0.001 |
| 38 | [MoP] Elite Plus Cemented Stem Charnley and Elite Plus LPW | 281   | 2.00 | 1.10  | [-0.41 , 2.60] | Non-inferiority not shown | 0.154  |
| 39 | [MoP] Elite Plus Cemented Stem Elite Plus Ogee             | 465   | 1.26 | 0.35  | [-0.63 , 1.33] | Non-inferiority not shown | 0.480  |
| 40 | [MoP] Exeter V40 ABG II Cementless Cup                     | 626   | 2.02 | 1.11  | [ 0.05 , 2.18] | Non-inferiority not shown | 0.040  |
| 41 | [MoP] Exeter V40 Cenator Cemented Cup                      | 1,274 | 2.26 | 1.36  | [ 0.65 , 2.07] | Inferior by $\geq 20\%$   | <0.001 |
| 42 | [MoP] Exeter V40 Charnley Ogee                             | 901   | 1.62 | 0.71  | [-0.03 , 1.46] | Non-inferiority not shown | 0.061  |
| 43 | [MoP] Exeter V40 Charnley and Elite Plus LPW               | 1,082 | 1.81 | 0.91  | [ 0.29 , 1.53] | Inferior by $\geq 20\%$   | 0.004  |
| 44 | [MoP] Exeter V40 Duraloc Cementless Cup                    | 754   | 2.24 | 1.33  | [ 0.39 , 2.27] | Inferior by $\geq 20\%$   | 0.005  |
| 45 | [MoP] Exeter V40 EP-Fit Plus                               | 424   | 3.64 | 2.74  | [ 1.09 , 4.38] | Inferior by $\geq 100\%$  | 0.001  |
| 46 | [MoP] Exeter V40 Elite Plus Ogee                           | 8,638 | 1.50 | 0.59  | [ 0.22 , 0.96] | Inferior by $\geq 20\%$   | 0.002  |

|    |                                                               |        |      |       |                |                           |        |
|----|---------------------------------------------------------------|--------|------|-------|----------------|---------------------------|--------|
| 1  | [MoP] Exeter V40 Exceed                                       | 265    | 0.94 | 0.04  | [-0.84 , 0.92] | Non-inferiority not shown | 0.934  |
| 2  | [MoP] Exeter V40 Exeter Contemporary Flanged                  | 16,415 | 1.58 | 0.67  | [ 0.33 , 1.01] | Inferior by $\geq 20\%$   | <0.001 |
| 3  | [MoP] Exeter V40 Exeter Contemporary Hooded                   | 7,073  | 2.79 | 1.89  | [ 1.47 , 2.30] | Inferior by $\geq 100\%$  | <0.001 |
| 4  | [MoP] Exeter V40 Exeter Duration                              | 7,252  | 2.45 | 1.55  | [ 1.13 , 1.97] | Inferior by $\geq 100\%$  | <0.001 |
| 5  | [MoP] Exeter V40 Opera                                        | 1,144  | 1.59 | 0.68  | [ 0.06 , 1.31] | Non-inferiority not shown | 0.032  |
| 6  | [MoP] Exeter V40 Pinnacle                                     | 718    | 1.89 | 0.98  | [ 0.35 , 1.61] | Inferior by $\geq 20\%$   | 0.002  |
| 7  | [MoP] Exeter V40 Reflection Cementless                        | 1,359  | 2.31 | 1.41  | [ 0.66 , 2.15] | Inferior by $\geq 20\%$   | <0.001 |
| 8  | [MoP] Exeter V40 Trident                                      | 5,685  | 1.85 | 0.95  | [ 0.57 , 1.33] | Inferior by $\geq 20\%$   | <0.001 |
| 9  | [MoP] Exeter V40 Trilogy                                      | 4,380  | 1.67 | 0.77  | [ 0.34 , 1.19] | Inferior by $\geq 20\%$   | <0.001 |
| 10 | [MoP] Exeter V40 Ultima Cemented Cup                          | 916    | 2.29 | 1.38  | [ 0.47 , 2.29] | Inferior by $\geq 20\%$   | 0.003  |
| 11 | [MoP] Furlong Cemented Stem JRI Cemented Cup                  | 1,041  | 1.99 | 1.09  | [ 0.31 , 1.86] | Inferior by $\geq 20\%$   | 0.006  |
| 12 | [MoP] Furlong HAC Stem CSF                                    | 4,138  | 3.06 | 2.15  | [ 1.63 , 2.67] | Inferior by $\geq 100\%$  | <0.001 |
| 13 | [MoP] Furlong HAC Stem Furlong HAC CSF Plus                   | 731    | 3.34 | 2.44  | [ 1.72 , 3.16] | Inferior by $\geq 100\%$  | <0.001 |
| 14 | [MoP] Furlong HAC Stem Furlong Threaded                       | 348    | 3.27 | 2.37  | [ 0.75 , 3.98] | Inferior by $\geq 20\%$   | 0.004  |
| 15 | [MoP] MS-30 Original ME Muller Low Profile Cup                | 334    | 1.74 | 0.83  | [-0.27 , 1.93] | Non-inferiority not shown | 0.139  |
| 16 | [MoP] Mem Original ME Muller Low Profile Cup                  | 286    | 0.86 | -0.05 | [-1.06 , 0.97] | Non-inferiority not shown | 0.926  |
| 17 | [MoP] Muller Straight Stem Centerpulse Muller                 | 316    | 3.15 | 2.24  | [ 0.56 , 3.92] | Inferior by $\geq 20\%$   | 0.009  |
| 18 | [MoP] Muller Straight Stem Original ME Muller Low Profile Cup | 646    | 2.06 | 1.16  | [ 0.27 , 2.04] | Inferior by $\geq 20\%$   | 0.010  |
| 19 | [MoP] Muller-Biomet Apollo                                    | 1,089  | 1.70 | 0.80  | [ 0.13 , 1.46] | Non-inferiority not shown | 0.019  |
| 20 | [MoP] Muller-Biomet Original ME Muller Low Profile Cup        | 267    | 2.22 | 1.32  | [ 0.21 , 2.42] | Inferior by $\geq 20\%$   | 0.019  |
| 21 | [MoP] Omnifit Cemented Stem ODC                               | 708    | 2.78 | 1.88  | [ 0.73 , 3.03] | Inferior by $\geq 20\%$   | 0.001  |
| 22 | [MoP] Omnifit Cementless Stem Secure Fit Cementless Cup       | 255    | 1.42 | 0.52  | [-0.90 , 1.93] | Non-inferiority not shown | 0.476  |
| 23 | [MoP] Omnifit Cementless Stem Trident                         | 321    | 6.51 | 5.61  | [ 3.28 , 7.94] | Inferior by $\geq 100\%$  | <0.001 |
| 24 | [MoP] SL-Plus Cementless Stem EP-Fit Plus                     | 1,230  | 4.42 | 3.52  | [ 2.58 , 4.46] | Inferior by $\geq 100\%$  | <0.001 |
| 25 | [MoP] SP II Cemented Stem Interplanta                         | 455    | 4.00 | 3.09  | [ 1.54 , 4.65] | Inferior by $\geq 100\%$  | <0.001 |
| 26 | [MoP] Stanmore Modular Stem SHP Cup                           | 480    | 1.46 | 0.55  | [-0.33 , 1.44] | Non-inferiority not shown | 0.222  |
| 27 | [MoP] Stanmore Modular Stem Stanmore-Arcom Cup                | 1,908  | 1.97 | 1.06  | [ 0.51 , 1.61] | Inferior by $\geq 20\%$   | <0.001 |
| 28 | [MoP] Synergy Cementless Stem Reflection Cementless           | 1,002  | 1.75 | 0.85  | [ 0.10 , 1.60] | Non-inferiority not shown | 0.027  |
| 29 | [MoP] Taperloc Cementless Stem Exceed                         | 370    | 2.27 | 1.37  | [ 0.04 , 2.69] | Non-inferiority not shown | 0.043  |
| 30 | [MoP] Taperloc Cementless Stem Exceed ABT                     | 513    | 2.52 | 1.61  | [ 0.96 , 2.26] | Inferior by $\geq 100\%$  | <0.001 |
| 31 | [MoP] Versys Cementless Stem Trilogy                          | 714    | 4.81 | 3.91  | [ 2.48 , 5.33] | Inferior by $\geq 100\%$  | <0.001 |

Supplementary table 1d: Difference in Kaplan-Meier failure estimate between a contemporary reference and implants with at least 250 at risk at 10 years since primary

| Stem/cup brand                                                | Number at risk | Cumulative failure (%) | Difference in failure (%) | 95% CI          | Equivalence status        | p-value |
|---------------------------------------------------------------|----------------|------------------------|---------------------------|-----------------|---------------------------|---------|
| [MoP] Exeter V40 Elite Plus Ogee                              | 3,580          | 2.14                   | [REFERENCE]               |                 |                           |         |
| [CoC] ABG II Monolithic Cementless Stem ABG II Cementless Cup | 695            | 4.42                   | 2.28                      | [ 0.96 , 3.60]  | Inferior by $\geq 20\%$   | 0.001   |
| [CoC] ABG II Monolithic Cementless Stem Trident               | 412            | 4.15                   | 2.01                      | [ 0.68 , 3.34]  | Inferior by $\geq 20\%$   | 0.003   |
| [CoC] Accolade Trident                                        | 454            | 4.38                   | 2.24                      | [ 1.48 , 3.00]  | Inferior by $\geq 20\%$   | <0.001  |
| [CoC] Corail Duraloc Option                                   | 383            | 4.45                   | 2.31                      | [ 0.93 , 3.68]  | Inferior by $\geq 20\%$   | 0.001   |
| [CoC] Corail Pinnacle                                         | 886            | 3.90                   | 1.76                      | [ 1.23 , 2.29]  | Inferior by $\geq 20\%$   | <0.001  |
| [CoC] Exeter V40 ABG II Cementless Cup                        | 440            | 2.66                   | 0.52                      | [-0.54 , 1.58]  | Non-inferiority not shown | 0.334   |
| [CoC] Exeter V40 Trident                                      | 1,846          | 2.59                   | 0.44                      | [-0.04 , 0.93]  | Non-inferiority not shown | 0.072   |
| [CoC] Furlong HAC Stem CSF                                    | 829            | 4.37                   | 2.22                      | [ 1.13 , 3.32]  | Inferior by $\geq 20\%$   | <0.001  |
| [CoC] SL-Plus Cementless Stem EP-Fit Plus                     | 288            | 6.94                   | 4.80                      | [ 3.25 , 6.35]  | Inferior by $\geq 100\%$  | <0.001  |
| [CoP] C-Stem Cemented Stem Wroblewski Golf Ball               | 317            | 2.51                   | 0.36                      | [-0.88 , 1.61]  | Non-inferiority not shown | 0.567   |
| [CoP] Exeter V40 Exeter Contemporary Flanged                  | 269            | 2.10                   | -0.05                     | [-0.90 , 0.80]  | Non-inferiority not shown | 0.913   |
| [CoP] Exeter V40 Trilogy                                      | 494            | 1.91                   | -0.23                     | [-0.96 , 0.50]  | Non-inferiority not shown | 0.537   |
| [CoP] Furlong HAC Stem CSF                                    | 2,520          | 2.65                   | 0.51                      | [-0.02 , 1.03]  | Non-inferiority not shown | 0.058   |
| [MoP] ABG II Monolithic Cementless Stem ABG II Cementless Cup | 278            | 4.37                   | 2.22                      | [ 0.21 , 4.24]  | Non-inferiority not shown | 0.031   |
| [MoP] C-Stem Cemented Stem Charnley Ogee                      | 293            | 2.25                   | 0.11                      | [-0.97 , 1.19]  | Non-inferiority not shown | 0.846   |
| [MoP] C-Stem Cemented Stem Charnley and Elite Plus LPW        | 725            | 2.45                   | 0.30                      | [-0.54 , 1.14]  | Non-inferiority not shown | 0.481   |
| [MoP] C-Stem Cemented Stem Elite Plus Cemented Cup            | 267            | 2.49                   | 0.35                      | [-1.08 , 1.79]  | Non-inferiority not shown | 0.632   |
| [MoP] C-Stem Cemented Stem Elite Plus Ogee                    | 882            | 2.57                   | 0.43                      | [-0.33 , 1.19]  | Non-inferiority not shown | 0.271   |
| [MoP] C-Stem Cemented Stem Opera                              | 356            | 3.79                   | 1.64                      | [ 0.21 , 3.08]  | Non-inferiority not shown | 0.025   |
| [MoP] C-Stem Cemented Stem Wroblewski Golf Ball               | 259            | 2.47                   | 0.33                      | [-0.94 , 1.59]  | Non-inferiority not shown | 0.614   |
| [MoP] CPT Elite Plus Ogee                                     | 408            | 3.16                   | 1.01                      | [ 0.04 , 1.98]  | Non-inferiority not shown | 0.041   |
| [MoP] CPT Trilogy                                             | 1,135          | 4.29                   | 2.14                      | [ 1.42 , 2.86]  | Inferior by $\geq 20\%$   | <0.001  |
| [MoP] CPT ZCA                                                 | 1,233          | 3.71                   | 1.57                      | [ 0.95 , 2.19]  | Inferior by $\geq 20\%$   | <0.001  |
| [MoP] Charnley Cemented Stem Charnley Cemented Cup            | 1,751          | 3.52                   | 1.38                      | [ 0.69 , 2.07]  | Inferior by $\geq 20\%$   | <0.001  |
| [MoP] Charnley Cemented Stem Charnley Ogee                    | 3,102          | 3.93                   | 1.78                      | [ 1.23 , 2.34]  | Inferior by $\geq 20\%$   | <0.001  |
| [MoP] Charnley Cemented Stem Charnley and Elite Plus LPW      | 2,284          | 2.43                   | 0.29                      | [-0.25 , 0.83]  | Non-inferiority not shown | 0.297   |
| [MoP] Charnley Cemented Stem Opera                            | 254            | 3.99                   | 1.85                      | [ 0.19 , 3.51]  | Non-inferiority not shown | 0.029   |
| [MoP] Charnley Cemented Stem Wroblewski Golf Ball             | 419            | 2.42                   | 0.28                      | [-0.81 , 1.36]  | Non-inferiority not shown | 0.619   |
| [MoP] Corail Duraloc Cementless Cup                           | 1,200          | 5.37                   | 3.22                      | [ 2.31 , 4.14]  | Inferior by $\geq 100\%$  | <0.001  |
| [MoP] Corail Pinnacle                                         | 1,681          | 3.05                   | 0.91                      | [ 0.45 , 1.36]  | Inferior by $\geq 20\%$   | <0.001  |
| [MoP] Elite Plus Cemented Stem Elite Plus Ogee                | 351            | 2.03                   | -0.11                     | [-1.41 , 1.19]  | Non-inferiority not shown | 0.865   |
| [MoP] Exeter V40 ABG II Cementless Cup                        | 429            | 2.62                   | 0.48                      | [-0.77 , 1.73]  | Non-inferiority not shown | 0.456   |
| [MoP] Exeter V40 Cenator Cemented Cup                         | 694            | 2.64                   | 0.49                      | [-0.29 , 1.28]  | Non-inferiority not shown | 0.219   |
| [MoP] Exeter V40 Charnley Ogee                                | 561            | 1.62                   | -0.52                     | [-1.26 , 0.21]  | Non-inferior              | 0.163   |
| [MoP] Exeter V40 Charnley and Elite Plus LPW                  | 404            | 2.44                   | 0.30                      | [-0.53 , 1.12]  | Non-inferiority not shown | 0.484   |
| [MoP] Exeter V40 Duraloc Cementless Cup                       | 451            | 4.19                   | 2.05                      | [ 0.62 , 3.48]  | Inferior by $\geq 20\%$   | 0.005   |
| [MoP] Exeter V40 Elite Plus Cemented Cup                      | 725            | 1.44                   | -0.70                     | [-1.31 , -0.09] | Non-inferior              | 0.024   |
| [MoP] Exeter V40 Exeter Contemporary Flanged                  | 4,653          | 2.28                   | 0.13                      | [-0.23 , 0.49]  | Non-inferiority not shown | 0.469   |

|    |                                                     |       |      |      |                |                           |        |
|----|-----------------------------------------------------|-------|------|------|----------------|---------------------------|--------|
| 1  | [MoP] Exeter V40 Exeter Contemporary Hooded         | 2,355 | 4.12 | 1.97 | [ 1.45 , 2.49] | Inferior by $\geq 20\%$   | <0.001 |
| 2  | [MoP] Exeter V40 Exeter Duration                    | 2,967 | 3.71 | 1.56 | [ 1.05 , 2.07] | Inferior by $\geq 20\%$   | <0.001 |
| 3  | [MoP] Exeter V40 Opera                              | 443   | 3.23 | 1.09 | [-0.03 , 2.21] | Non-inferiority not shown | 0.057  |
| 4  | [MoP] Exeter V40 Reflection Cementless              | 393   | 4.18 | 2.03 | [ 0.76 , 3.30] | Inferior by $\geq 20\%$   | 0.002  |
| 5  | [MoP] Exeter V40 Trident                            | 1,116 | 2.71 | 0.56 | [ 0.05 , 1.08] | Non-inferiority not shown | 0.031  |
| 6  | [MoP] Exeter V40 Trilogy                            | 1,538 | 2.49 | 0.35 | [-0.17 , 0.87] | Non-inferiority not shown | 0.191  |
| 7  | [MoP] Exeter V40 Ultima Cemented Cup                | 498   | 3.27 | 1.12 | [-0.03 , 2.27] | Non-inferiority not shown | 0.056  |
| 8  | [MoP] Furlong Cemented Stem JRI Cemented Cup        | 584   | 3.23 | 1.09 | [ 0.01 , 2.17] | Non-inferiority not shown | 0.048  |
| 9  | [MoP] Furlong HAC Stem CSF                          | 1,697 | 4.41 | 2.27 | [ 1.61 , 2.92] | Inferior by $\geq 20\%$   | <0.001 |
| 10 | [MoP] Muller-Biomet Apollo                          | 371   | 2.67 | 0.53 | [-0.56 , 1.62] | Non-inferiority not shown | 0.345  |
| 11 | [MoP] Omnifit Cemented Stem ODC                     | 458   | 3.89 | 1.74 | [ 0.35 , 3.14] | Non-inferiority not shown | 0.014  |
| 12 | [MoP] SP II Cemented Stem Interplanta               | 258   | 5.45 | 3.31 | [ 1.32 , 5.30] | Inferior by $\geq 20\%$   | 0.001  |
| 13 | [MoP] Stanmore Modular Stem Stanmore-Arcom Cup      | 669   | 2.52 | 0.38 | [-0.29 , 1.04] | Non-inferiority not shown | 0.264  |
| 14 | [MoP] Synergy Cementless Stem Reflection Cementless | 322   | 2.38 | 0.24 | [-0.80 , 1.28] | Non-inferiority not shown | 0.651  |
| 15 | [MoP] Versys Cementless Stem Trilogy                | 464   | 5.47 | 3.32 | [ 1.77 , 4.87] | Inferior by $\geq 20\%$   | <0.001 |

Supplemental table 2a: Difference in Kaplan-Meier failure estimate between a contemporary reference and implants with at least 250 at risk at 3 years since primary in females

| Stem/cup brand                                                | Number at risk | Cumulative failure (%) | Difference in failure (%) | 95% CI         | Equivalence status        | p-value |
|---------------------------------------------------------------|----------------|------------------------|---------------------------|----------------|---------------------------|---------|
| [CoP] MS-30 Original ME Muller Low Profile Cup                | 1,096          | 0.41                   | [REFERENCE]               |                |                           |         |
| [CoC] ABG II Monolithic Cementless Stem ABG II Cementless Cup | 502            | 1.36                   | 0.96                      | [-0.11 , 2.02] | Non-inferiority not shown | 0.079   |
| [CoC] ABG II Monolithic Cementless Stem Trident               | 465            | 2.24                   | 1.84                      | [ 0.48 , 3.19] | Inferior by $\geq 100\%$  | 0.008   |
| [CoC] Accolade Trident                                        | 3,662          | 1.78                   | 1.37                      | [ 0.83 , 1.92] | Inferior by $\geq 100\%$  | <0.001  |
| [CoC] Bimetric Cementless Stem Exceed ABT                     | 511            | 1.18                   | 0.77                      | [-0.17 , 1.70] | Non-inferiority not shown | 0.108   |
| [CoC] C-Stem AMT Cemented Stem Pinnacle                       | 487            | 1.06                   | 0.65                      | [-0.22 , 1.52] | Non-inferiority not shown | 0.143   |
| [CoC] CPT Continuum                                           | 481            | 1.17                   | 0.76                      | [-0.13 , 1.64] | Non-inferiority not shown | 0.093   |
| [CoC] CPT Trilogy AB                                          | 305            | 0.97                   | 0.56                      | [-0.59 , 1.71] | Non-inferiority not shown | 0.339   |
| [CoC] Corail Delta TT                                         | 453            | 1.90                   | 1.49                      | [ 0.44 , 2.54] | Inferior by $\geq 100\%$  | 0.005   |
| [CoC] Corail DeltaMotion                                      | 696            | 1.22                   | 0.81                      | [-0.02 , 1.65] | Non-inferiority not shown | 0.056   |
| [CoC] Corail Duraloc Option                                   | 580            | 1.68                   | 1.27                      | [ 0.18 , 2.36] | Inferior by $\geq 20\%$   | 0.023   |
| [CoC] Corail Pinnacle                                         | 14,431         | 1.67                   | 1.26                      | [ 0.85 , 1.66] | Inferior by $\geq 100\%$  | <0.001  |
| [CoC] Corail Pinnacle Gription                                | 292            | 2.28                   | 1.87                      | [ 0.57 , 3.17] | Inferior by $\geq 100\%$  | 0.005   |
| [CoC] Corail Trinity                                          | 256            | 0.21                   | -0.20                     | [-0.74 , 0.35] | Non-inferiority not shown | 0.474   |
| [CoC] Excia Cementless Plasmacup SC                           | 471            | 1.52                   | 1.11                      | [ 0.06 , 2.17] | Non-inferiority not shown | 0.038   |
| [CoC] Exeter V40 ABG II Cementless Cup                        | 887            | 0.40                   | -0.01                     | [-0.54 , 0.52] | Non-inferiority not shown | 0.964   |
| [CoC] Exeter V40 Trident                                      | 5,950          | 0.91                   | 0.51                      | [ 0.08 , 0.93] | Non-inferiority not shown | 0.020   |
| [CoC] Furlong Evolution Cementless Furlong HAC CSF Plus       | 323            | 0.90                   | 0.49                      | [-0.17 , 1.16] | Non-inferiority not shown | 0.147   |
| [CoC] Furlong HAC Stem CSF                                    | 881            | 1.54                   | 1.13                      | [ 0.26 , 2.01] | Inferior by $\geq 20\%$   | 0.011   |
| [CoC] Furlong HAC Stem Furlong HAC CSF Plus                   | 4,954          | 1.49                   | 1.08                      | [ 0.62 , 1.54] | Inferior by $\geq 100\%$  | <0.001  |
| [CoC] M/L Taper Cementless Continuum                          | 689            | 1.52                   | 1.11                      | [ 0.24 , 1.98] | Inferior by $\geq 20\%$   | 0.012   |
| [CoC] Metafix Stem Trinity                                    | 469            | 1.43                   | 1.03                      | [ 0.13 , 1.93] | Inferior by $\geq 20\%$   | 0.025   |
| [CoC] Omnifit Cementless Stem Trident                         | 267            | 2.20                   | 1.79                      | [ 0.01 , 3.57] | Non-inferiority not shown | 0.048   |
| [CoC] Polarstem Cementless R3 Cementless                      | 460            | 1.10                   | 0.70                      | [-0.19 , 1.59] | Non-inferiority not shown | 0.125   |
| [CoC] S-Rom Cementless Stem Pinnacle                          | 327            | 2.46                   | 2.06                      | [ 0.50 , 3.61] | Inferior by $\geq 100\%$  | 0.010   |
| [CoC] SL-Plus Cementless Stem EP-Fit Plus                     | 602            | 1.75                   | 1.34                      | [ 0.26 , 2.43] | Inferior by $\geq 20\%$   | 0.015   |
| [CoC] SPS Modular April - Ceramic                             | 302            | 2.39                   | 1.98                      | [ 0.31 , 3.66] | Inferior by $\geq 20\%$   | 0.020   |
| [CoC] Summit Cementless Stem Pinnacle                         | 269            | 1.14                   | 0.73                      | [-0.44 , 1.90] | Non-inferiority not shown | 0.223   |
| [CoC] Taperloc Cementless Stem Exceed ABT                     | 3,728          | 1.43                   | 1.02                      | [ 0.54 , 1.50] | Inferior by $\geq 100\%$  | <0.001  |
| [CoC] miniHip Trinity                                         | 441            | 1.11                   | 0.70                      | [-0.19 , 1.60] | Non-inferiority not shown | 0.125   |
| [CoP] Accolade Trident                                        | 1,760          | 1.39                   | 0.98                      | [ 0.40 , 1.56] | Inferior by $\geq 20\%$   | 0.001   |
| [CoP] C-Stem Cemented Stem Elite Plus Ogee                    | 342            | 0.28                   | -0.12                     | [-0.79 , 0.54] | Non-inferiority not shown | 0.716   |
| [CoP] C-Stem Cemented Stem Marathon                           | 626            | 1.01                   | 0.60                      | [-0.13 , 1.33] | Non-inferiority not shown | 0.108   |
| [CoP] C-Stem Cemented Stem Opera                              | 445            | 0.22                   | -0.19                     | [-0.75 , 0.38] | Non-inferiority not shown | 0.515   |
| [CoP] C-Stem Cemented Stem Wroblewski Golf Ball               | 517            | 0.53                   | 0.12                      | [-0.57 , 0.82] | Non-inferiority not shown | 0.732   |
| [CoP] CPT Trilogy                                             | 871            | 1.24                   | 0.84                      | [ 0.27 , 1.40] | Inferior by $\geq 20\%$   | 0.004   |
| [CoP] Corail Charnley and Elite Plus LPW                      | 376            | 2.14                   | 1.73                      | [ 0.30 , 3.16] | Inferior by $\geq 20\%$   | 0.018   |
| [CoP] Corail Elite Plus Cemented Cup                          | 267            | 0.91                   | 0.50                      | [-0.58 , 1.58] | Non-inferiority not shown | 0.367   |
| [CoP] Corail Elite Plus Ogee                                  | 268            | 1.67                   | 1.26                      | [-0.23 , 2.76] | Non-inferiority not shown | 0.098   |
| [CoP] Corail Marathon                                         | 787            | 0.72                   | 0.31                      | [-0.26 , 0.89] | Non-inferiority not shown | 0.285   |

|    |                                                            |       |      |       |                |                           |        |
|----|------------------------------------------------------------|-------|------|-------|----------------|---------------------------|--------|
| 1  | [CoP] Corail Pinnacle                                      | 4,637 | 1.27 | 0.86  | [ 0.43 , 1.29] | Inferior by $\geq 100\%$  | <0.001 |
| 2  | [CoP] Corail Trilogy                                       | 437   | 0.87 | 0.46  | [-0.46 , 1.39] | Non-inferiority not shown | 0.324  |
| 3  | [CoP] Exeter V40 Charnley and Elite Plus LPW               | 374   | 1.99 | 1.58  | [ 0.30 , 2.86] | Inferior by $\geq 20\%$   | 0.015  |
| 4  | [CoP] Exeter V40 Elite Plus Ogee                           | 655   | 0.57 | 0.16  | [-0.45 , 0.77] | Non-inferiority not shown | 0.611  |
| 5  | [CoP] Exeter V40 Exeter Contemporary Flanged               | 1,849 | 1.14 | 0.73  | [ 0.18 , 1.28] | Inferior by $\geq 20\%$   | 0.009  |
| 6  | [CoP] Exeter V40 Exeter Contemporary Hooded                | 482   | 1.83 | 1.42  | [ 0.29 , 2.56] | Inferior by $\geq 20\%$   | 0.014  |
| 7  | [CoP] Exeter V40 Exeter Duration                           | 476   | 0.93 | 0.52  | [-0.37 , 1.40] | Non-inferiority not shown | 0.251  |
| 8  | [CoP] Exeter V40 Exeter X3 Rimfit                          | 1,264 | 0.76 | 0.35  | [-0.14 , 0.84] | Non-inferiority not shown | 0.164  |
| 9  | [CoP] Exeter V40 Marathon                                  | 284   | 0.92 | 0.51  | [-0.48 , 1.49] | Non-inferiority not shown | 0.312  |
| 10 | [CoP] Exeter V40 Pinnacle                                  | 292   | 1.12 | 0.71  | [-0.20 , 1.62] | Non-inferiority not shown | 0.127  |
| 11 | [CoP] Exeter V40 Trident                                   | 2,940 | 0.93 | 0.52  | [ 0.08 , 0.96] | Inferior by $\geq 20\%$   | 0.020  |
| 12 | [CoP] Exeter V40 Trilogy                                   | 1,182 | 0.60 | 0.19  | [-0.36 , 0.74] | Non-inferiority not shown | 0.491  |
| 13 | [CoP] Exeter V40 Tritanium                                 | 250   | 1.74 | 1.33  | [ 0.12 , 2.55] | Inferior by $\geq 20\%$   | 0.032  |
| 14 | [CoP] Furlong HAC Stem CSF                                 | 3,748 | 1.32 | 0.91  | [ 0.41 , 1.41] | Inferior by $\geq 100\%$  | <0.001 |
| 15 | [CoP] Furlong HAC Stem Furlong HAC CSF Plus                | 840   | 2.36 | 1.95  | [ 0.99 , 2.91] | Inferior by $\geq 100\%$  | <0.001 |
| 16 | [CoP] SL-Plus Cementless Stem Bicon-Plus                   | 342   | 1.66 | 1.25  | [-0.11 , 2.61] | Non-inferiority not shown | 0.073  |
| 17 | [CoP] SL-Plus Cementless Stem EP-Fit Plus                  | 593   | 1.93 | 1.52  | [ 0.38 , 2.66] | Inferior by $\geq 20\%$   | 0.009  |
| 18 | [CoP] Stanmore Modular Stem Stanmore-Arcom Cup             | 262   | 1.58 | 1.17  | [-0.25 , 2.59] | Non-inferiority not shown | 0.106  |
| 19 | [CoP] Taperloc Cementless Stem Exceed ABT                  | 1,062 | 0.99 | 0.59  | [ 0.01 , 1.16] | Non-inferiority not shown | 0.046  |
| 20 | [MoP] Accolade Trident                                     | 5,487 | 1.75 | 1.34  | [ 0.86 , 1.82] | Inferior by $\geq 100\%$  | <0.001 |
| 21 | [MoP] Anthology R3 Cementless                              | 729   | 1.46 | 1.05  | [ 0.29 , 1.81] | Inferior by $\geq 20\%$   | 0.007  |
| 22 | [MoP] C-Stem AMT Cemented Stem Charnley and Elite Plus LPW | 1,437 | 0.91 | 0.50  | [-0.07 , 1.07] | Non-inferiority not shown | 0.085  |
| 23 | [MoP] C-Stem AMT Cemented Stem Elite Plus Cemented Cup     | 438   | 0.61 | 0.20  | [-0.57 , 0.97] | Non-inferiority not shown | 0.614  |
| 24 | [MoP] C-Stem AMT Cemented Stem Elite Plus Ogee             | 1,135 | 0.84 | 0.43  | [-0.15 , 1.01] | Non-inferiority not shown | 0.149  |
| 25 | [MoP] C-Stem AMT Cemented Stem Marathon                    | 751   | 0.88 | 0.47  | [-0.10 , 1.04] | Non-inferiority not shown | 0.108  |
| 26 | [MoP] C-Stem AMT Cemented Stem Pinnacle                    | 985   | 1.24 | 0.84  | [ 0.25 , 1.42] | Inferior by $\geq 20\%$   | 0.005  |
| 27 | [MoP] C-Stem Cemented Stem Charnley Ogee                   | 597   | 1.48 | 1.07  | [ 0.09 , 2.05] | Inferior by $\geq 20\%$   | 0.033  |
| 28 | [MoP] C-Stem Cemented Stem Charnley and Elite Plus LPW     | 1,119 | 1.17 | 0.76  | [ 0.05 , 1.46] | Non-inferiority not shown | 0.035  |
| 29 | [MoP] C-Stem Cemented Stem Duraloc Cementless Cup          | 420   | 1.59 | 1.18  | [-0.04 , 2.41] | Non-inferiority not shown | 0.058  |
| 30 | [MoP] C-Stem Cemented Stem Elite Plus Cemented Cup         | 390   | 0.47 | 0.06  | [-0.68 , 0.80] | Non-inferiority not shown | 0.870  |
| 31 | [MoP] C-Stem Cemented Stem Elite Plus Ogee                 | 1,985 | 0.69 | 0.28  | [-0.21 , 0.78] | Non-inferiority not shown | 0.257  |
| 32 | [MoP] C-Stem Cemented Stem Marathon                        | 959   | 0.63 | 0.22  | [-0.30 , 0.73] | Non-inferiority not shown | 0.407  |
| 33 | [MoP] C-Stem Cemented Stem Opera                           | 836   | 0.68 | 0.27  | [-0.38 , 0.91] | Non-inferiority not shown | 0.417  |
| 34 | [MoP] C-Stem Cemented Stem Pinnacle                        | 301   | 1.59 | 1.19  | [-0.13 , 2.50] | Non-inferiority not shown | 0.077  |
| 35 | [MoP] C-Stem Cemented Stem Wroblewski Golf Ball            | 625   | 0.74 | 0.33  | [-0.41 , 1.07] | Non-inferiority not shown | 0.379  |
| 36 | [MoP] CCA Cemented Stem CCB Cup                            | 793   | 0.62 | 0.21  | [-0.40 , 0.82] | Non-inferiority not shown | 0.501  |
| 37 | [MoP] CLS Cementless Stem Allofit                          | 336   | 1.93 | 1.52  | [ 0.06 , 2.99] | Non-inferiority not shown | 0.041  |
| 38 | [MoP] CLS Cementless Stem Trilogy                          | 321   | 3.16 | 2.75  | [ 0.88 , 4.62] | Inferior by $\geq 100\%$  | 0.004  |
| 39 | [MoP] CMK Modular Cemented Stem CMK Cemented Cup           | 319   | 0.30 | -0.11 | [-0.79 , 0.58] | Non-inferiority not shown | 0.755  |
| 40 | [MoP] CPCS Opera                                           | 804   | 0.95 | 0.55  | [-0.20 , 1.30] | Non-inferiority not shown | 0.153  |
| 41 | [MoP] CPCS Polarcup Cementless                             | 259   | 0.76 | 0.35  | [-0.76 , 1.46] | Non-inferiority not shown | 0.535  |
| 42 | [MoP] CPCS Reflection Cemented                             | 264   | 1.10 | 0.69  | [-0.26 , 1.64] | Non-inferiority not shown | 0.156  |
| 43 | [MoP] CPS Plus Cenator Cemented Cup                        | 268   | 0.37 | -0.04 | [-0.85 , 0.77] | Non-inferiority not shown | 0.931  |
| 44 | [MoP] CPS Plus Opera                                       | 327   | 1.17 | 0.76  | [-0.43 , 1.96] | Non-inferiority not shown | 0.211  |
| 45 | [MoP] CPT Allofit                                          | 485   | 0.32 | -0.09 | [-0.66 , 0.48] | Non-inferiority not shown | 0.752  |
| 46 | [MoP] CPT Continuum                                        | 315   | 2.66 | 2.25  | [ 1.17 , 3.33] | Inferior by $\geq 100\%$  | <0.001 |

|    |                                                          |        |      |       |                |                           |        |
|----|----------------------------------------------------------|--------|------|-------|----------------|---------------------------|--------|
| 1  | [MoP] CPT Elite Plus Ogee                                | 1,550  | 1.24 | 0.83  | [ 0.21 , 1.46] | Inferior by $\geq 20\%$   | 0.009  |
| 2  | [MoP] CPT Exeter Contemporary Flanged                    | 283    | 2.17 | 1.76  | [ 0.31 , 3.21] | Inferior by $\geq 20\%$   | 0.017  |
| 3  | [MoP] CPT Opera                                          | 268    | 1.06 | 0.66  | [-0.59 , 1.91] | Non-inferiority not shown | 0.303  |
| 4  | [MoP] CPT Original ME Muller Low Profile Cup             | 600    | 1.30 | 0.89  | [ 0.00 , 1.78] | Non-inferiority not shown | 0.050  |
| 5  | [MoP] CPT Pinnacle                                       | 511    | 1.59 | 1.19  | [ 0.09 , 2.28] | Inferior by $\geq 20\%$   | 0.033  |
| 6  | [MoP] CPT Trabecular Metal Modular Cementless Cup        | 645    | 1.72 | 1.32  | [ 0.40 , 2.23] | Inferior by $\geq 20\%$   | 0.005  |
| 7  | [MoP] CPT Trilogy                                        | 5,622  | 1.20 | 0.79  | [ 0.35 , 1.22] | Inferior by $\geq 20\%$   | <0.001 |
| 8  | [MoP] CPT Trilogy IT                                     | 304    | 2.93 | 2.52  | [ 1.48 , 3.57] | Inferior by $\geq 100\%$  | <0.001 |
| 9  | [MoP] CPT ZCA                                            | 5,377  | 1.34 | 0.93  | [ 0.49 , 1.38] | Inferior by $\geq 100\%$  | <0.001 |
| 10 | [MoP] Centrament Chirulen                                | 294    | 0.00 | --    | [ -- , -- ]    | No failures to date       |        |
| 11 | [MoP] Charnley Cemented Stem Charnley Cemented Cup       | 2,552  | 0.97 | 0.56  | [ 0.04 , 1.07] | Non-inferiority not shown | 0.033  |
| 12 | [MoP] Charnley Cemented Stem Charnley Ogee               | 5,409  | 1.08 | 0.67  | [ 0.22 , 1.11] | Inferior by $\geq 20\%$   | 0.003  |
| 13 | [MoP] Charnley Cemented Stem Charnley and Elite Plus LPW | 4,125  | 0.61 | 0.20  | [-0.22 , 0.63] | Non-inferiority not shown | 0.352  |
| 14 | [MoP] Charnley Cemented Stem Opera                       | 823    | 0.70 | 0.29  | [-0.37 , 0.96] | Non-inferiority not shown | 0.385  |
| 15 | [MoP] Charnley Cemented Stem Wroblewski Golf Ball        | 609    | 1.53 | 1.12  | [ 0.11 , 2.12] | Inferior by $\geq 20\%$   | 0.029  |
| 16 | [MoP] Charnley Modular Charnley and Elite Plus LPW       | 275    | 0.36 | -0.05 | [-0.84 , 0.75] | Non-inferiority not shown | 0.908  |
| 17 | [MoP] Corail Charnley and Elite Plus LPW                 | 543    | 0.83 | 0.42  | [-0.33 , 1.17] | Non-inferiority not shown | 0.274  |
| 18 | [MoP] Corail Duraloc Cementless Cup                      | 2,139  | 1.30 | 0.89  | [ 0.30 , 1.48] | Inferior by $\geq 20\%$   | 0.003  |
| 19 | [MoP] Corail Elite Plus Cemented Cup                     | 629    | 0.42 | 0.02  | [-0.58 , 0.62] | Non-inferiority not shown | 0.955  |
| 20 | [MoP] Corail Elite Plus Ogee                             | 937    | 1.08 | 0.67  | [-0.01 , 1.36] | Non-inferiority not shown | 0.055  |
| 21 | [MoP] Corail Exeter Contemporary Flanged                 | 376    | 0.95 | 0.54  | [-0.37 , 1.45] | Non-inferiority not shown | 0.246  |
| 22 | [MoP] Corail Marathon                                    | 1,873  | 0.80 | 0.39  | [-0.08 , 0.87] | Non-inferiority not shown | 0.107  |
| 23 | [MoP] Corail Pinnacle                                    | 17,132 | 1.26 | 0.85  | [ 0.47 , 1.23] | Inferior by $\geq 100\%$  | <0.001 |
| 24 | [MoP] Corail Trident                                     | 385    | 1.01 | 0.60  | [-0.23 , 1.43] | Non-inferiority not shown | 0.154  |
| 25 | [MoP] Corail Trilogy                                     | 1,066  | 0.90 | 0.50  | [-0.15 , 1.14] | Non-inferiority not shown | 0.129  |
| 26 | [MoP] Elite Plus Cemented Stem Elite Plus Ogee           | 402    | 0.49 | 0.08  | [-0.68 , 0.84] | Non-inferiority not shown | 0.842  |
| 27 | [MoP] Exeter V40 ABG II Cementless Cup                   | 477    | 0.80 | 0.39  | [-0.47 , 1.25] | Non-inferiority not shown | 0.373  |
| 28 | [MoP] Exeter V40 Cenator Cemented Cup                    | 1,425  | 1.45 | 1.04  | [ 0.35 , 1.73] | Inferior by $\geq 20\%$   | 0.003  |
| 29 | [MoP] Exeter V40 Charnley Ogee                           | 1,068  | 1.00 | 0.59  | [-0.08 , 1.26] | Non-inferiority not shown | 0.083  |
| 30 | [MoP] Exeter V40 Charnley and Elite Plus LPW             | 1,811  | 1.31 | 0.90  | [ 0.31 , 1.50] | Inferior by $\geq 20\%$   | 0.003  |
| 31 | [MoP] Exeter V40 Duraloc Cementless Cup                  | 708    | 1.10 | 0.69  | [-0.15 , 1.53] | Non-inferiority not shown | 0.106  |
| 32 | [MoP] Exeter V40 EP-Fit Plus                             | 333    | 1.17 | 0.77  | [-0.43 , 1.96] | Non-inferiority not shown | 0.210  |
| 33 | [MoP] Exeter V40 Elite Plus Cemented Cup                 | 2,389  | 0.45 | 0.04  | [-0.39 , 0.48] | Non-inferiority not shown | 0.842  |
| 34 | [MoP] Exeter V40 Elite Plus Ogee                         | 10,898 | 0.70 | 0.29  | [-0.10 , 0.67] | Non-inferiority not shown | 0.142  |
| 35 | [MoP] Exeter V40 Exceed                                  | 333    | 0.85 | 0.44  | [-0.58 , 1.46] | Non-inferiority not shown | 0.397  |
| 36 | [MoP] Exeter V40 Exceed ABT                              | 284    | 0.94 | 0.53  | [-0.45 , 1.52] | Non-inferiority not shown | 0.290  |
| 37 | [MoP] Exeter V40 Exeter Contemporary Flanged             | 27,147 | 0.71 | 0.30  | [-0.07 , 0.67] | Non-inferiority not shown | 0.113  |
| 38 | [MoP] Exeter V40 Exeter Contemporary Hooded              | 10,906 | 1.39 | 0.98  | [ 0.58 , 1.39] | Inferior by $\geq 100\%$  | <0.001 |
| 39 | [MoP] Exeter V40 Exeter Duration                         | 8,897  | 1.05 | 0.64  | [ 0.23 , 1.05] | Inferior by $\geq 20\%$   | 0.002  |
| 40 | [MoP] Exeter V40 Exeter X3 Rimfit                        | 3,408  | 0.73 | 0.32  | [-0.09 , 0.73] | Non-inferiority not shown | 0.123  |
| 41 | [MoP] Exeter V40 Furlong HAC CSF Plus                    | 340    | 0.17 | -0.24 | [-0.73 , 0.25] | Non-inferiority not shown | 0.333  |
| 42 | [MoP] Exeter V40 Marathon                                | 884    | 0.88 | 0.47  | [-0.12 , 1.06] | Non-inferiority not shown | 0.119  |
| 43 | [MoP] Exeter V40 Opera                                   | 1,660  | 0.72 | 0.31  | [-0.22 , 0.84] | Non-inferiority not shown | 0.248  |
| 44 | [MoP] Exeter V40 Pinnacle                                | 1,807  | 0.97 | 0.56  | [ 0.05 , 1.07] | Non-inferiority not shown | 0.033  |
| 45 | [MoP] Exeter V40 R3 Cementless                           | 363    | 0.90 | 0.49  | [-0.27 , 1.26] | Non-inferiority not shown | 0.205  |
| 46 | [MoP] Exeter V40 Reflection Cementless                   | 1,308  | 0.73 | 0.32  | [-0.25 , 0.90] | Non-inferiority not shown | 0.273  |



|    |                                                               |        |      |       |                |                           |        |
|----|---------------------------------------------------------------|--------|------|-------|----------------|---------------------------|--------|
| 1  | [MoP] Exeter V40 Trabecular Metal Modular Cementless Cup      | 286    | 1.55 | 1.14  | [-0.14 , 2.42] | Non-inferiority not shown | 0.081  |
| 2  | [MoP] Exeter V40 Trident                                      | 11,298 | 0.97 | 0.57  | [ 0.18 , 0.95] | Inferior by $\geq 20\%$   | 0.004  |
| 3  | [MoP] Exeter V40 Trilogy                                      | 5,145  | 0.83 | 0.43  | [ 0.00 , 0.85] | Non-inferiority not shown | 0.050  |
| 4  | [MoP] Exeter V40 Tritanium                                    | 282    | 1.60 | 1.19  | [ 0.12 , 2.25] | Inferior by $\geq 20\%$   | 0.029  |
| 5  | [MoP] Exeter V40 Ultima Cemented Cup                          | 777    | 1.10 | 0.69  | [-0.11 , 1.49] | Non-inferiority not shown | 0.090  |
| 6  | [MoP] Furlong Cemented Stem JRI Cemented Cup                  | 1,036  | 1.43 | 1.02  | [ 0.24 , 1.81] | Inferior by $\geq 20\%$   | 0.010  |
| 7  | [MoP] Furlong HAC Stem CSF                                    | 4,074  | 2.18 | 1.77  | [ 1.22 , 2.33] | Inferior by $\geq 100\%$  | <0.001 |
| 8  | [MoP] Furlong HAC Stem Furlong HAC CSF Plus                   | 1,829  | 2.12 | 1.71  | [ 1.07 , 2.36] | Inferior by $\geq 100\%$  | <0.001 |
| 9  | [MoP] Furlong HAC Stem Furlong Threaded                       | 311    | 1.83 | 1.42  | [-0.07 , 2.92] | Non-inferiority not shown | 0.062  |
| 10 | [MoP] M/L Taper Cementless Continuum                          | 381    | 1.72 | 1.31  | [ 0.24 , 2.37] | Inferior by $\geq 20\%$   | 0.016  |
| 11 | [MoP] M/L Taper Cementless Trilogy                            | 281    | 2.08 | 1.68  | [ 0.34 , 3.01] | Inferior by $\geq 20\%$   | 0.014  |
| 12 | [MoP] MS-30 Original ME Muller Low Profile Cup                | 522    | 0.28 | -0.13 | [-0.66 , 0.40] | Non-inferiority not shown | 0.637  |
| 13 | [MoP] Muller Straight Stem Centerpulse Muller                 | 328    | 0.88 | 0.47  | [-0.58 , 1.52] | Non-inferiority not shown | 0.382  |
| 14 | [MoP] Muller Straight Stem Original ME Muller Low Profile Cup | 999    | 0.92 | 0.52  | [-0.12 , 1.15] | Non-inferiority not shown | 0.112  |
| 15 | [MoP] Muller-Biomet Apollo                                    | 1,201  | 1.32 | 0.91  | [ 0.19 , 1.63] | Inferior by $\geq 20\%$   | 0.013  |
| 16 | [MoP] Muller-Biomet Original ME Muller Low Profile Cup        | 707    | 1.32 | 0.91  | [ 0.02 , 1.80] | Non-inferiority not shown | 0.044  |
| 17 | [MoP] Omnifit Cemented Stem ODC                               | 614    | 1.56 | 1.15  | [ 0.13 , 2.18] | Inferior by $\geq 20\%$   | 0.027  |
| 18 | [MoP] Omnifit Cementless Stem Trident                         | 251    | 2.95 | 2.55  | [ 0.50 , 4.60] | Inferior by $\geq 100\%$  | 0.015  |
| 19 | [MoP] P10 Muller Original ME Muller Low Profile Cup           | 268    | 1.03 | 0.62  | [-0.59 , 1.83] | Non-inferiority not shown | 0.317  |
| 20 | [MoP] Polarstem Cementless R3 Cementless                      | 592    | 0.73 | 0.33  | [-0.19 , 0.85] | Non-inferiority not shown | 0.217  |
| 21 | [MoP] SL-Plus Cementless Stem EP-Fit Plus                     | 1,198  | 2.40 | 2.00  | [ 1.14 , 2.85] | Inferior by $\geq 100\%$  | <0.001 |
| 22 | [MoP] SP II Cemented Stem Interplanta                         | 444    | 1.84 | 1.43  | [ 0.19 , 2.68] | Inferior by $\geq 20\%$   | 0.024  |
| 23 | [MoP] Stanmore Modular Stem Elite Plus Cemented Cup           | 367    | 0.26 | -0.15 | [-0.77 , 0.48] | Non-inferiority not shown | 0.647  |
| 24 | [MoP] Stanmore Modular Stem SHP Cup                           | 664    | 0.75 | 0.34  | [-0.36 , 1.04] | Non-inferiority not shown | 0.339  |
| 25 | [MoP] Stanmore Modular Stem Stanmore-Arcom Cup                | 2,729  | 1.12 | 0.71  | [ 0.19 , 1.23] | Inferior by $\geq 20\%$   | 0.007  |
| 26 | [MoP] Synergy Cementless Stem R3 Cementless                   | 554    | 1.00 | 0.59  | [-0.08 , 1.26] | Non-inferiority not shown | 0.082  |
| 27 | [MoP] Synergy Cementless Stem Reflection Cementless           | 859    | 0.68 | 0.27  | [-0.38 , 0.92] | Non-inferiority not shown | 0.416  |
| 28 | [MoP] Taperfit Cemented Stem Atlas IIIp                       | 327    | 1.14 | 0.73  | [-0.33 , 1.79] | Non-inferiority not shown | 0.177  |
| 29 | [MoP] Taperloc Cementless Stem Exceed                         | 318    | 1.20 | 0.79  | [-0.43 , 2.01] | Non-inferiority not shown | 0.204  |
| 30 | [MoP] Taperloc Cementless Stem Exceed ABT                     | 2,287  | 1.98 | 1.57  | [ 0.98 , 2.16] | Inferior by $\geq 100\%$  | <0.001 |
| 31 | [MoP] Versys Cementless Stem Trilogy                          | 492    | 3.79 | 3.38  | [ 1.71 , 5.05] | Inferior by $\geq 100\%$  | <0.001 |

**Supplemental table 2b: Difference in Kaplan-Meier failure estimate between a contemporary reference and implants with at least 250 at risk at 5 years since primary in females**

| Stem/cup brand                                                | Number at risk | Cumulative failure (%) | Difference in failure (%) | 95% CI         | Equivalence status        | p-value |
|---------------------------------------------------------------|----------------|------------------------|---------------------------|----------------|---------------------------|---------|
| [MoP] Exeter V40 Elite Plus Cemented Cup                      | 1,769          | 0.54                   | [REFERENCE]               |                |                           |         |
| [CoC] ABG II Monolithic Cementless Stem ABG II Cementless Cup | 485            | 1.76                   | 1.22                      | [ 0.05 , 2.40] | Non-inferiority not shown | 0.041   |
| [CoC] ABG II Monolithic Cementless Stem Trident               | 372            | 2.95                   | 2.41                      | [ 0.86 , 3.96] | Inferior by $\geq 100\%$  | 0.002   |
| [CoC] Accolade Trident                                        | 2,906          | 2.56                   | 2.02                      | [ 1.44 , 2.59] | Inferior by $\geq 100\%$  | <0.001  |
| [CoC] Bimetric Cementless Stem Exceed ABT                     | 369            | 1.84                   | 1.30                      | [ 0.13 , 2.48] | Inferior by $\geq 20\%$   | 0.030   |
| [CoC] C-Stem AMT Cemented Stem Pinnacle                       | 268            | 1.80                   | 1.26                      | [ 0.08 , 2.44] | Non-inferiority not shown | 0.037   |
| [CoC] CPT Trilogy AB                                          | 278            | 1.64                   | 1.10                      | [-0.35 , 2.55] | Non-inferiority not shown | 0.138   |
| [CoC] Corail DeltaMotion                                      | 373            | 1.47                   | 0.93                      | [-0.01 , 1.86] | Non-inferiority not shown | 0.051   |
| [CoC] Corail Duraloc Option                                   | 566            | 2.70                   | 2.16                      | [ 0.83 , 3.49] | Inferior by $\geq 100\%$  | 0.001   |
| [CoC] Corail Pinnacle                                         | 9,650          | 2.16                   | 1.62                      | [ 1.26 , 1.97] | Inferior by $\geq 100\%$  | <0.001  |
| [CoC] Excia Cementless Plasmacup SC                           | 266            | 1.52                   | 0.98                      | [-0.04 , 2.01] | Non-inferiority not shown | 0.061   |
| [CoC] Exeter V40 ABG II Cementless Cup                        | 760            | 1.10                   | 0.56                      | [-0.17 , 1.30] | Non-inferiority not shown | 0.133   |
| [CoC] Exeter V40 Trident                                      | 4,852          | 1.27                   | 0.74                      | [ 0.35 , 1.13] | Inferior by $\geq 20\%$   | <0.001  |
| [CoC] Furlong HAC Stem CSF                                    | 839            | 2.11                   | 1.57                      | [ 0.59 , 2.55] | Inferior by $\geq 100\%$  | 0.002   |
| [CoC] Furlong HAC Stem Furlong HAC CSF Plus                   | 3,077          | 1.78                   | 1.24                      | [ 0.81 , 1.68] | Inferior by $\geq 100\%$  | <0.001  |
| [CoC] M/L Taper Cementless Continuum                          | 304            | 1.68                   | 1.14                      | [ 0.25 , 2.04] | Inferior by $\geq 20\%$   | 0.012   |
| [CoC] S-Rom Cementless Stem Pinnacle                          | 251            | 3.21                   | 2.67                      | [ 0.83 , 4.52] | Inferior by $\geq 100\%$  | 0.004   |
| [CoC] SL-Plus Cementless Stem EP-Fit Plus                     | 565            | 3.43                   | 2.89                      | [ 1.42 , 4.36] | Inferior by $\geq 100\%$  | <0.001  |
| [CoC] Taperloc Cementless Stem Exceed ABT                     | 2,243          | 1.79                   | 1.25                      | [ 0.78 , 1.72] | Inferior by $\geq 100\%$  | <0.001  |
| [CoP] Accolade Trident                                        | 828            | 1.84                   | 1.31                      | [ 0.66 , 1.95] | Inferior by $\geq 100\%$  | <0.001  |
| [CoP] C-Stem Cemented Stem Elite Plus Ogee                    | 262            | 0.62                   | 0.08                      | [-0.82 , 0.98] | Non-inferiority not shown | 0.860   |
| [CoP] C-Stem Cemented Stem Marathon                           | 297            | 1.21                   | 0.67                      | [-0.13 , 1.48] | Non-inferiority not shown | 0.099   |
| [CoP] C-Stem Cemented Stem Opera                              | 374            | 1.20                   | 0.66                      | [-0.42 , 1.74] | Non-inferiority not shown | 0.232   |
| [CoP] C-Stem Cemented Stem Wroblewski Golf Ball               | 417            | 0.73                   | 0.19                      | [-0.57 , 0.95] | Non-inferiority not shown | 0.628   |
| [CoP] Corail Charnley and Elite Plus LPW                      | 321            | 2.42                   | 1.88                      | [ 0.37 , 3.39] | Inferior by $\geq 20\%$   | 0.015   |
| [CoP] Corail Marathon                                         | 333            | 1.04                   | 0.50                      | [-0.19 , 1.19] | Non-inferiority not shown | 0.153   |
| [CoP] Corail Pinnacle                                         | 2,442          | 1.71                   | 1.17                      | [ 0.75 , 1.59] | Inferior by $\geq 100\%$  | <0.001  |
| [CoP] Corail Trilogy                                          | 397            | 1.10                   | 0.56                      | [-0.44 , 1.56] | Non-inferiority not shown | 0.269   |
| [CoP] Exeter V40 Elite Plus Ogee                              | 478            | 1.06                   | 0.52                      | [-0.27 , 1.31] | Non-inferiority not shown | 0.198   |
| [CoP] Exeter V40 Exeter Contemporary Flanged                  | 1,225          | 1.60                   | 1.06                      | [ 0.45 , 1.66] | Inferior by $\geq 20\%$   | 0.001   |
| [CoP] Exeter V40 Exeter Contemporary Hooded                   | 358            | 2.31                   | 1.77                      | [ 0.48 , 3.06] | Inferior by $\geq 20\%$   | 0.007   |
| [CoP] Exeter V40 Exeter Duration                              | 405            | 0.93                   | 0.39                      | [-0.47 , 1.24] | Non-inferiority not shown | 0.374   |
| [CoP] Exeter V40 Trident                                      | 1,446          | 1.28                   | 0.75                      | [ 0.29 , 1.20] | Inferior by $\geq 20\%$   | 0.001   |
| [CoP] Exeter V40 Trilogy                                      | 997            | 0.86                   | 0.32                      | [-0.26 , 0.89] | Non-inferiority not shown | 0.278   |
| [CoP] Furlong HAC Stem CSF                                    | 3,217          | 1.83                   | 1.29                      | [ 0.79 , 1.79] | Inferior by $\geq 100\%$  | <0.001  |
| [CoP] Furlong HAC Stem Furlong HAC CSF Plus                   | 508            | 2.55                   | 2.01                      | [ 1.01 , 3.01] | Inferior by $\geq 100\%$  | <0.001  |
| [CoP] MS-30 Original ME Muller Low Profile Cup                | 796            | 0.64                   | 0.10                      | [-0.45 , 0.65] | Non-inferiority not shown | 0.725   |
| [CoP] SL-Plus Cementless Stem Bicon-Plus                      | 306            | 3.49                   | 2.95                      | [ 0.99 , 4.91] | Inferior by $\geq 100\%$  | 0.003   |
| [CoP] SL-Plus Cementless Stem EP-Fit Plus                     | 499            | 3.49                   | 2.95                      | [ 1.46 , 4.45] | Inferior by $\geq 100\%$  | <0.001  |
| [CoP] Taperloc Cementless Stem Exceed ABT                     | 466            | 1.23                   | 0.69                      | [ 0.07 , 1.31] | Non-inferiority not shown | 0.029   |

|    |                                                            |        |      |       |                |                           |        |
|----|------------------------------------------------------------|--------|------|-------|----------------|---------------------------|--------|
| 1  | [MoP] Accolade Trident                                     | 3,698  | 2.36 | 1.82  | [ 1.34 , 2.29] | Inferior by $\geq 100\%$  | <0.001 |
| 2  | [MoP] C-Stem AMT Cemented Stem Charnley and Elite Plus LPW | 954    | 1.29 | 0.75  | [ 0.13 , 1.37] | Inferior by $\geq 20\%$   | 0.017  |
| 3  | [MoP] C-Stem AMT Cemented Stem Elite Plus Cemented Cup     | 313    | 0.85 | 0.31  | [-0.57 , 1.18] | Non-inferiority not shown | 0.488  |
| 4  | [MoP] C-Stem AMT Cemented Stem Elite Plus Ogee             | 666    | 1.18 | 0.64  | [-0.02 , 1.30] | Non-inferiority not shown | 0.058  |
| 5  | [MoP] C-Stem AMT Cemented Stem Pinnacle                    | 426    | 1.66 | 1.12  | [ 0.40 , 1.83] | Inferior by $\geq 20\%$   | 0.002  |
| 6  | [MoP] C-Stem Cemented Stem Charnley Ogee                   | 480    | 2.25 | 1.71  | [ 0.50 , 2.92] | Inferior by $\geq 20\%$   | 0.006  |
| 7  | [MoP] C-Stem Cemented Stem Charnley and Elite Plus LPW     | 1,007  | 1.81 | 1.28  | [ 0.46 , 2.09] | Inferior by $\geq 20\%$   | 0.002  |
| 8  | [MoP] C-Stem Cemented Stem Duraloc Cementless Cup          | 388    | 2.33 | 1.79  | [ 0.34 , 3.24] | Inferior by $\geq 20\%$   | 0.016  |
| 9  | [MoP] C-Stem Cemented Stem Elite Plus Cemented Cup         | 357    | 0.47 | -0.07 | [-0.77 , 0.64] | Non-inferiority not shown | 0.848  |
| 10 | [MoP] C-Stem Cemented Stem Elite Plus Ogee                 | 1,554  | 1.02 | 0.49  | [-0.02 , 0.99] | Non-inferiority not shown | 0.062  |
| 11 | [MoP] C-Stem Cemented Stem Marathon                        | 473    | 0.91 | 0.37  | [-0.24 , 0.98] | Non-inferiority not shown | 0.235  |
| 12 | [MoP] C-Stem Cemented Stem Opera                           | 626    | 0.95 | 0.41  | [-0.30 , 1.13] | Non-inferiority not shown | 0.259  |
| 13 | [MoP] C-Stem Cemented Stem Wroblewski Golf Ball            | 488    | 1.61 | 1.07  | [ 0.04 , 2.11] | Non-inferiority not shown | 0.042  |
| 14 | [MoP] CCA Cemented Stem CCB Cup                            | 535    | 0.92 | 0.38  | [-0.32 , 1.08] | Non-inferiority not shown | 0.289  |
| 15 | [MoP] CLS Cementless Stem Allofit                          | 316    | 2.53 | 1.99  | [ 0.33 , 3.64] | Inferior by $\geq 20\%$   | 0.019  |
| 16 | [MoP] CMK Modular Cemented Stem CMK Cemented Cup           | 291    | 1.25 | 0.72  | [-0.54 , 1.97] | Non-inferiority not shown | 0.263  |
| 17 | [MoP] CPCS Opera                                           | 586    | 1.63 | 1.09  | [ 0.17 , 2.02] | Inferior by $\geq 20\%$   | 0.020  |
| 18 | [MoP] CPS Plus Opera                                       | 309    | 1.78 | 1.25  | [-0.20 , 2.69] | Non-inferiority not shown | 0.090  |
| 19 | [MoP] CPT Allofit                                          | 308    | 0.58 | 0.04  | [-0.69 , 0.77] | Non-inferiority not shown | 0.921  |
| 20 | [MoP] CPT Elite Plus Ogee                                  | 1,115  | 1.60 | 1.06  | [ 0.40 , 1.73] | Inferior by $\geq 20\%$   | 0.002  |
| 21 | [MoP] CPT Opera                                            | 252    | 1.84 | 1.30  | [-0.32 , 2.92] | Non-inferiority not shown | 0.116  |
| 22 | [MoP] CPT Original ME Muller Low Profile Cup               | 322    | 1.98 | 1.44  | [ 0.28 , 2.60] | Inferior by $\geq 20\%$   | 0.015  |
| 23 | [MoP] CPT Pinnacle                                         | 433    | 2.03 | 1.49  | [ 0.27 , 2.72] | Inferior by $\geq 20\%$   | 0.017  |
| 24 | [MoP] CPT Trabecular Metal Modular Cementless Cup          | 399    | 2.48 | 1.95  | [ 0.79 , 3.10] | Inferior by $\geq 100\%$  | 0.001  |
| 25 | [MoP] CPT Trilogy                                          | 3,903  | 2.10 | 1.56  | [ 1.11 , 2.01] | Inferior by $\geq 100\%$  | <0.001 |
| 26 | [MoP] CPT ZCA                                              | 3,998  | 1.98 | 1.44  | [ 1.00 , 1.88] | Inferior by $\geq 100\%$  | <0.001 |
| 27 | [MoP] Charnley Cemented Stem Charnley Cemented Cup         | 2,265  | 1.42 | 0.88  | [ 0.35 , 1.41] | Inferior by $\geq 20\%$   | 0.001  |
| 28 | [MoP] Charnley Cemented Stem Charnley Ogee                 | 4,710  | 1.63 | 1.10  | [ 0.67 , 1.53] | Inferior by $\geq 100\%$  | <0.001 |
| 29 | [MoP] Charnley Cemented Stem Charnley and Elite Plus LPW   | 3,628  | 1.00 | 0.46  | [ 0.05 , 0.86] | Non-inferiority not shown | 0.027  |
| 30 | [MoP] Charnley Cemented Stem Opera                         | 697    | 1.35 | 0.81  | [-0.03 , 1.65] | Non-inferiority not shown | 0.058  |
| 31 | [MoP] Charnley Cemented Stem Wroblewski Golf Ball          | 487    | 1.73 | 1.19  | [ 0.14 , 2.24] | Inferior by $\geq 20\%$   | 0.027  |
| 32 | [MoP] Corail Charnley and Elite Plus LPW                   | 332    | 1.29 | 0.75  | [-0.21 , 1.71] | Non-inferiority not shown | 0.126  |
| 33 | [MoP] Corail Duraloc Cementless Cup                        | 2,023  | 2.10 | 1.56  | [ 0.90 , 2.22] | Inferior by $\geq 100\%$  | <0.001 |
| 34 | [MoP] Corail Elite Plus Cemented Cup                       | 481    | 0.99 | 0.45  | [-0.39 , 1.29] | Non-inferiority not shown | 0.295  |
| 35 | [MoP] Corail Elite Plus Ogee                               | 678    | 1.65 | 1.11  | [ 0.30 , 1.93] | Inferior by $\geq 20\%$   | 0.007  |
| 36 | [MoP] Corail Marathon                                      | 921    | 0.93 | 0.40  | [-0.06 , 0.85] | Non-inferiority not shown | 0.089  |
| 37 | [MoP] Corail Pinnacle                                      | 10,090 | 1.56 | 1.03  | [ 0.71 , 1.35] | Inferior by $\geq 100\%$  | <0.001 |
| 38 | [MoP] Corail Trilogy                                       | 859    | 1.22 | 0.69  | [-0.01 , 1.38] | Non-inferiority not shown | 0.054  |
| 39 | [MoP] Elite Plus Cemented Stem Elite Plus Ogee             | 362    | 1.26 | 0.72  | [-0.41 , 1.86] | Non-inferiority not shown | 0.211  |
| 40 | [MoP] Exeter V40 ABG II Cementless Cup                     | 458    | 1.01 | 0.47  | [-0.45 , 1.40] | Non-inferiority not shown | 0.315  |
| 41 | [MoP] Exeter V40 Cenator Cemented Cup                      | 1,153  | 2.12 | 1.58  | [ 0.80 , 2.36] | Inferior by $\geq 100\%$  | <0.001 |
| 42 | [MoP] Exeter V40 Charnley Ogee                             | 900    | 1.39 | 0.85  | [ 0.12 , 1.59] | Inferior by $\geq 20\%$   | 0.023  |
| 43 | [MoP] Exeter V40 Charnley and Elite Plus LPW               | 1,309  | 1.61 | 1.07  | [ 0.46 , 1.68] | Inferior by $\geq 20\%$   | 0.001  |
| 44 | [MoP] Exeter V40 Duraloc Cementless Cup                    | 671    | 1.82 | 1.28  | [ 0.26 , 2.30] | Inferior by $\geq 20\%$   | 0.014  |
| 45 | [MoP] Exeter V40 EP-Fit Plus                               | 312    | 2.98 | 2.44  | [ 0.60 , 4.29] | Inferior by $\geq 100\%$  | 0.009  |
| 46 | [MoP] Exeter V40 Elite Plus Ogee                           | 8,315  | 1.02 | 0.48  | [ 0.15 , 0.81] | Inferior by $\geq 20\%$   | 0.004  |

|    |                                                               |        |      |      |                |                           |        |
|----|---------------------------------------------------------------|--------|------|------|----------------|---------------------------|--------|
| 1  | [MoP] Exeter V40 Exceed                                       | 250    | 0.85 | 0.31 | [-0.68 , 1.30] | Non-inferiority not shown | 0.541  |
| 2  | [MoP] Exeter V40 Exeter Contemporary Flanged                  | 17,934 | 1.04 | 0.50 | [ 0.20 , 0.80] | Inferior by $\geq 20\%$   | 0.001  |
| 3  | [MoP] Exeter V40 Exeter Contemporary Hooded                   | 7,664  | 2.02 | 1.48 | [ 1.10 , 1.85] | Inferior by $\geq 100\%$  | <0.001 |
| 4  | [MoP] Exeter V40 Exeter Duration                              | 7,168  | 1.43 | 0.89 | [ 0.53 , 1.25] | Inferior by $\geq 20\%$   | <0.001 |
| 5  | [MoP] Exeter V40 Exeter X3 Rimfit                             | 550    | 0.92 | 0.38 | [-0.02 , 0.79] | Non-inferiority not shown | 0.066  |
| 6  | [MoP] Exeter V40 Marathon                                     | 364    | 1.25 | 0.71 | [-0.04 , 1.46] | Non-inferiority not shown | 0.064  |
| 7  | [MoP] Exeter V40 Opera                                        | 1,221  | 0.98 | 0.44 | [-0.10 , 0.98] | Non-inferiority not shown | 0.110  |
| 8  | [MoP] Exeter V40 Pinnacle                                     | 1,075  | 1.24 | 0.70 | [ 0.17 , 1.24] | Inferior by $\geq 20\%$   | 0.010  |
| 9  | [MoP] Exeter V40 Reflection Cementless                        | 1,164  | 1.05 | 0.51 | [-0.10 , 1.13] | Non-inferiority not shown | 0.100  |
| 10 | [MoP] Exeter V40 Trident                                      | 6,743  | 1.30 | 0.76 | [ 0.43 , 1.09] | Inferior by $\geq 20\%$   | <0.001 |
| 11 | [MoP] Exeter V40 Trilogy                                      | 4,060  | 1.24 | 0.70 | [ 0.30 , 1.10] | Inferior by $\geq 20\%$   | 0.001  |
| 12 | [MoP] Exeter V40 Ultima Cemented Cup                          | 720    | 1.90 | 1.36 | [ 0.37 , 2.35] | Inferior by $\geq 20\%$   | 0.007  |
| 13 | [MoP] Furlong Cemented Stem JRI Cemented Cup                  | 892    | 1.74 | 1.20 | [ 0.38 , 2.03] | Inferior by $\geq 20\%$   | 0.004  |
| 14 | [MoP] Furlong HAC Stem CSF                                    | 3,340  | 2.50 | 1.96 | [ 1.43 , 2.50] | Inferior by $\geq 100\%$  | <0.001 |
| 15 | [MoP] Furlong HAC Stem Furlong HAC CSF Plus                   | 1,122  | 2.75 | 2.21 | [ 1.48 , 2.94] | Inferior by $\geq 100\%$  | <0.001 |
| 16 | [MoP] Furlong HAC Stem Furlong Threaded                       | 269    | 2.84 | 2.30 | [ 0.45 , 4.15] | Inferior by $\geq 20\%$   | 0.015  |
| 17 | [MoP] MS-30 Original ME Muller Low Profile Cup                | 366    | 0.98 | 0.44 | [-0.48 , 1.36] | Non-inferiority not shown | 0.351  |
| 18 | [MoP] Muller Straight Stem Centerpulse Muller                 | 291    | 1.85 | 1.31 | [-0.18 , 2.81] | Non-inferiority not shown | 0.085  |
| 19 | [MoP] Muller Straight Stem Original ME Muller Low Profile Cup | 718    | 1.26 | 0.72 | [ 0.02 , 1.42] | Non-inferiority not shown | 0.044  |
| 20 | [MoP] Muller-Biomet Apollo                                    | 972    | 1.50 | 0.97 | [ 0.24 , 1.69] | Inferior by $\geq 20\%$   | 0.009  |
| 21 | [MoP] Muller-Biomet Original ME Muller Low Profile Cup        | 442    | 1.79 | 1.25 | [ 0.25 , 2.26] | Inferior by $\geq 20\%$   | 0.015  |
| 22 | [MoP] Omnifit Cemented Stem ODC                               | 559    | 2.23 | 1.69 | [ 0.50 , 2.87] | Inferior by $\geq 20\%$   | 0.005  |
| 23 | [MoP] SL-Plus Cementless Stem EP-Fit Plus                     | 980    | 3.12 | 2.58 | [ 1.62 , 3.54] | Inferior by $\geq 100\%$  | <0.001 |
| 24 | [MoP] SP II Cemented Stem Interplanta                         | 392    | 2.33 | 1.79 | [ 0.40 , 3.18] | Inferior by $\geq 20\%$   | 0.012  |
| 25 | [MoP] Stanmore Modular Stem Elite Plus Cemented Cup           | 273    | 1.19 | 0.65 | [-0.55 , 1.85] | Non-inferiority not shown | 0.287  |
| 26 | [MoP] Stanmore Modular Stem SHP Cup                           | 483    | 0.75 | 0.21 | [-0.45 , 0.87] | Non-inferiority not shown | 0.534  |
| 27 | [MoP] Stanmore Modular Stem Stanmore-Arcom Cup                | 2,115  | 1.69 | 1.15 | [ 0.60 , 1.70] | Inferior by $\geq 100\%$  | <0.001 |
| 28 | [MoP] Synergy Cementless Stem Reflection Cementless           | 825    | 0.91 | 0.38 | [-0.31 , 1.06] | Non-inferiority not shown | 0.284  |
| 29 | [MoP] Taperloc Cementless Stem Exceed                         | 277    | 1.84 | 1.30 | [-0.18 , 2.79] | Non-inferiority not shown | 0.086  |
| 30 | [MoP] Taperloc Cementless Stem Exceed ABT                     | 1,136  | 2.32 | 1.78 | [ 1.17 , 2.38] | Inferior by $\geq 100\%$  | <0.001 |
| 31 | [MoP] Versys Cementless Stem Trilogy                          | 462    | 4.99 | 4.45 | [ 2.56 , 6.34] | Inferior by $\geq 100\%$  | <0.001 |

## Supplemental table 2c: Difference in Kaplan-Meier failure estimate between a contemporary reference and implants with at least 250 at risk at 7 years since primary in females

| Stem/cup brand                                                | Number at risk | Cumulative failure (%) | Difference in failure (%) | 95% CI         | Equivalence status        | p-value |
|---------------------------------------------------------------|----------------|------------------------|---------------------------|----------------|---------------------------|---------|
| [MoP] Exeter V40 Elite Plus Cemented Cup                      | 1,165          | 0.76                   | [REFERENCE]               |                |                           |         |
| [CoC] ABG II Monolithic Cementless Stem ABG II Cementless Cup | 441            | 2.60                   | 1.84                      | [ 0.40 , 3.29] | Inferior by $\geq 20\%$   | 0.012   |
| [CoC] ABG II Monolithic Cementless Stem Trident               | 341            | 3.21                   | 2.45                      | [ 0.80 , 4.10] | Inferior by $\geq 100\%$  | 0.004   |
| [CoC] Accolade Trident                                        | 1,744          | 3.15                   | 2.39                      | [ 1.69 , 3.09] | Inferior by $\geq 100\%$  | <0.001  |
| [CoC] Corail Duraloc Option                                   | 466            | 3.09                   | 2.33                      | [ 0.88 , 3.79] | Inferior by $\geq 100\%$  | 0.002   |
| [CoC] Corail Pinnacle                                         | 4,397          | 2.64                   | 1.88                      | [ 1.42 , 2.34] | Inferior by $\geq 100\%$  | <0.001  |
| [CoC] Exeter V40 ABG II Cementless Cup                        | 615            | 1.55                   | 0.79                      | [-0.13 , 1.71] | Non-inferiority not shown | 0.094   |
| [CoC] Exeter V40 Trident                                      | 3,449          | 1.85                   | 1.09                      | [ 0.58 , 1.61] | Inferior by $\geq 20\%$   | <0.001  |
| [CoC] Furlong HAC Stem CSF                                    | 776            | 3.08                   | 2.32                      | [ 1.12 , 3.53] | Inferior by $\geq 100\%$  | <0.001  |
| [CoC] Furlong HAC Stem Furlong HAC CSF Plus                   | 1,170          | 2.19                   | 1.43                      | [ 0.87 , 2.00] | Inferior by $\geq 100\%$  | <0.001  |
| [CoC] SL-Plus Cementless Stem EP-Fit Plus                     | 486            | 3.61                   | 2.85                      | [ 1.32 , 4.38] | Inferior by $\geq 100\%$  | <0.001  |
| [CoC] Taperloc Cementless Stem Exceed ABT                     | 981            | 1.93                   | 1.17                      | [ 0.60 , 1.74] | Inferior by $\geq 20\%$   | <0.001  |
| [CoP] Accolade Trident                                        | 345            | 1.98                   | 1.22                      | [ 0.48 , 1.96] | Inferior by $\geq 20\%$   | 0.001   |
| [CoP] C-Stem Cemented Stem Opera                              | 274            | 1.84                   | 1.08                      | [-0.34 , 2.49] | Non-inferiority not shown | 0.135   |
| [CoP] C-Stem Cemented Stem Wroblewski Golf Ball               | 347            | 1.80                   | 1.05                      | [-0.27 , 2.37] | Non-inferiority not shown | 0.120   |
| [CoP] Corail Pinnacle                                         | 1,028          | 2.07                   | 1.32                      | [ 0.74 , 1.89] | Inferior by $\geq 20\%$   | <0.001  |
| [CoP] Corail Trilogy                                          | 310            | 1.10                   | 0.34                      | [-0.69 , 1.37] | Non-inferiority not shown | 0.513   |
| [CoP] Exeter V40 Elite Plus Ogee                              | 304            | 1.29                   | 0.54                      | [-0.41 , 1.49] | Non-inferiority not shown | 0.268   |
| [CoP] Exeter V40 Exeter Contemporary Flanged                  | 694            | 1.78                   | 1.02                      | [ 0.32 , 1.73] | Inferior by $\geq 20\%$   | 0.004   |
| [CoP] Exeter V40 Exeter Duration                              | 309            | 2.02                   | 1.26                      | [-0.12 , 2.65] | Non-inferiority not shown | 0.074   |
| [CoP] Exeter V40 Trident                                      | 656            | 1.46                   | 0.71                      | [ 0.13 , 1.28] | Non-inferiority not shown | 0.017   |
| [CoP] Exeter V40 Trilogy                                      | 723            | 1.19                   | 0.43                      | [-0.30 , 1.16] | Non-inferiority not shown | 0.249   |
| [CoP] Furlong HAC Stem CSF                                    | 2,638          | 2.37                   | 1.61                      | [ 0.99 , 2.22] | Inferior by $\geq 100\%$  | <0.001  |
| [CoP] MS-30 Original ME Muller Low Profile Cup                | 489            | 0.64                   | -0.12                     | [-0.72 , 0.48] | Non-inferiority not shown | 0.696   |
| [CoP] SL-Plus Cementless Stem EP-Fit Plus                     | 364            | 4.38                   | 3.63                      | [ 1.89 , 5.37] | Inferior by $\geq 100\%$  | <0.001  |
| [MoP] Accolade Trident                                        | 1,704          | 3.00                   | 2.25                      | [ 1.63 , 2.86] | Inferior by $\geq 100\%$  | <0.001  |
| [MoP] C-Stem AMT Cemented Stem Charnley and Elite Plus LPW    | 534            | 1.65                   | 0.89                      | [ 0.06 , 1.71] | Non-inferiority not shown | 0.035   |
| [MoP] C-Stem AMT Cemented Stem Elite Plus Ogee                | 378            | 1.98                   | 1.22                      | [ 0.17 , 2.28] | Inferior by $\geq 20\%$   | 0.023   |
| [MoP] C-Stem Cemented Stem Charnley Ogee                      | 384            | 2.49                   | 1.73                      | [ 0.41 , 3.05] | Inferior by $\geq 20\%$   | 0.010   |
| [MoP] C-Stem Cemented Stem Charnley and Elite Plus LPW        | 915            | 2.34                   | 1.58                      | [ 0.61 , 2.54] | Inferior by $\geq 20\%$   | 0.001   |
| [MoP] C-Stem Cemented Stem Duraloc Cementless Cup             | 300            | 3.44                   | 2.68                      | [ 0.86 , 4.49] | Inferior by $\geq 100\%$  | 0.004   |
| [MoP] C-Stem Cemented Stem Elite Plus Cemented Cup            | 295            | 1.05                   | 0.30                      | [-0.80 , 1.39] | Non-inferiority not shown | 0.598   |
| [MoP] C-Stem Cemented Stem Elite Plus Ogee                    | 1,198          | 1.54                   | 0.79                      | [ 0.10 , 1.47] | Non-inferiority not shown | 0.024   |
| [MoP] C-Stem Cemented Stem Opera                              | 463            | 1.66                   | 0.90                      | [-0.12 , 1.93] | Non-inferiority not shown | 0.084   |
| [MoP] C-Stem Cemented Stem Wroblewski Golf Ball               | 333            | 2.18                   | 1.42                      | [ 0.10 , 2.73] | Non-inferiority not shown | 0.034   |
| [MoP] CPS Plus Opera                                          | 279            | 2.13                   | 1.37                      | [-0.24 , 2.97] | Non-inferiority not shown | 0.095   |
| [MoP] CPT Elite Plus Ogee                                     | 741            | 2.31                   | 1.55                      | [ 0.65 , 2.45] | Inferior by $\geq 20\%$   | 0.001   |
| [MoP] CPT Trilogy                                             | 2,474          | 2.68                   | 1.92                      | [ 1.34 , 2.50] | Inferior by $\geq 100\%$  | <0.001  |
| [MoP] CPT ZCA                                                 | 2,612          | 2.46                   | 1.70                      | [ 1.15 , 2.26] | Inferior by $\geq 100\%$  | <0.001  |
| [MoP] Charnley Cemented Stem Charnley Cemented Cup            | 1,879          | 1.93                   | 1.18                      | [ 0.52 , 1.83] | Inferior by $\geq 20\%$   | <0.001  |

|    |                                                               |        |      |      |                |                           |        |
|----|---------------------------------------------------------------|--------|------|------|----------------|---------------------------|--------|
| 1  | [MoP] Charnley Cemented Stem Charnley Ogee                    | 3,746  | 1.93 | 1.18 | [ 0.65 , 1.70] | Inferior by $\geq 20\%$   | <0.001 |
| 2  | [MoP] Charnley Cemented Stem Charnley and Elite Plus LPW      | 2,920  | 1.35 | 0.59 | [ 0.08 , 1.11] | Non-inferiority not shown | 0.024  |
| 3  | [MoP] Charnley Cemented Stem Opera                            | 496    | 2.12 | 1.37 | [ 0.26 , 2.47] | Inferior by $\geq 20\%$   | 0.015  |
| 4  | [MoP] Charnley Cemented Stem Wroblewski Golf Ball             | 404    | 1.73 | 0.97 | [-0.11 , 2.05] | Non-inferiority not shown | 0.079  |
| 5  | [MoP] Corail Duraloc Cementless Cup                           | 1,695  | 3.25 | 2.49 | [ 1.65 , 3.34] | Inferior by $\geq 100\%$  | <0.001 |
| 6  | [MoP] Corail Elite Plus Cemented Cup                          | 322    | 1.46 | 0.70 | [-0.39 , 1.79] | Non-inferiority not shown | 0.208  |
| 7  | [MoP] Corail Elite Plus Ogee                                  | 456    | 1.85 | 1.09 | [ 0.16 , 2.03] | Inferior by $\geq 20\%$   | 0.022  |
| 8  | [MoP] Corail Pinnacle                                         | 4,975  | 2.01 | 1.25 | [ 0.82 , 1.68] | Inferior by $\geq 100\%$  | <0.001 |
| 9  | [MoP] Corail Trilogy                                          | 533    | 1.87 | 1.11 | [ 0.14 , 2.08] | Non-inferiority not shown | 0.025  |
| 10 | [MoP] Elite Plus Cemented Stem Elite Plus Ogee                | 329    | 1.26 | 0.50 | [-0.66 , 1.67] | Non-inferiority not shown | 0.394  |
| 11 | [MoP] Exeter V40 ABG II Cementless Cup                        | 416    | 1.25 | 0.49 | [-0.57 , 1.55] | Non-inferiority not shown | 0.365  |
| 12 | [MoP] Exeter V40 Cenator Cemented Cup                         | 860    | 2.22 | 1.46 | [ 0.62 , 2.30] | Inferior by $\geq 20\%$   | 0.001  |
| 13 | [MoP] Exeter V40 Charnley Ogee                                | 721    | 1.39 | 0.64 | [-0.14 , 1.41] | Non-inferiority not shown | 0.108  |
| 14 | [MoP] Exeter V40 Charnley and Elite Plus LPW                  | 788    | 1.99 | 1.23 | [ 0.48 , 1.99] | Inferior by $\geq 20\%$   | 0.001  |
| 15 | [MoP] Exeter V40 Duraloc Cementless Cup                       | 507    | 2.12 | 1.37 | [ 0.24 , 2.49] | Inferior by $\geq 20\%$   | 0.017  |
| 16 | [MoP] Exeter V40 EP-Fit Plus                                  | 268    | 3.64 | 2.88 | [ 0.82 , 4.94] | Inferior by $\geq 100\%$  | 0.006  |
| 17 | [MoP] Exeter V40 Elite Plus Ogee                              | 5,848  | 1.40 | 0.65 | [ 0.21 , 1.08] | Inferior by $\geq 20\%$   | 0.004  |
| 18 | [MoP] Exeter V40 Exeter Contemporary Flanged                  | 11,143 | 1.36 | 0.60 | [ 0.20 , 1.00] | Inferior by $\geq 20\%$   | 0.003  |
| 19 | [MoP] Exeter V40 Exeter Contemporary Hooded                   | 4,810  | 2.77 | 2.01 | [ 1.52 , 2.51] | Inferior by $\geq 100\%$  | <0.001 |
| 20 | [MoP] Exeter V40 Exeter Duration                              | 5,153  | 2.05 | 1.29 | [ 0.81 , 1.77] | Inferior by $\geq 100\%$  | <0.001 |
| 21 | [MoP] Exeter V40 Opera                                        | 805    | 1.35 | 0.59 | [-0.10 , 1.29] | Non-inferiority not shown | 0.095  |
| 22 | [MoP] Exeter V40 Pinnacle                                     | 507    | 1.45 | 0.69 | [ 0.04 , 1.35] | Non-inferiority not shown | 0.038  |
| 23 | [MoP] Exeter V40 Reflection Cementless                        | 877    | 1.73 | 0.97 | [ 0.14 , 1.80] | Non-inferiority not shown | 0.022  |
| 24 | [MoP] Exeter V40 Trident                                      | 3,625  | 1.74 | 0.99 | [ 0.53 , 1.44] | Inferior by $\geq 20\%$   | <0.001 |
| 25 | [MoP] Exeter V40 Trilogy                                      | 2,694  | 1.53 | 0.77 | [ 0.27 , 1.28] | Inferior by $\geq 20\%$   | 0.003  |
| 26 | [MoP] Exeter V40 Ultima Cemented Cup                          | 635    | 2.04 | 1.28 | [ 0.22 , 2.33] | Inferior by $\geq 20\%$   | 0.018  |
| 27 | [MoP] Furlong Cemented Stem JRI Cemented Cup                  | 730    | 2.09 | 1.33 | [ 0.39 , 2.28] | Inferior by $\geq 20\%$   | 0.006  |
| 28 | [MoP] Furlong HAC Stem CSF                                    | 2,586  | 3.04 | 2.28 | [ 1.64 , 2.92] | Inferior by $\geq 100\%$  | <0.001 |
| 29 | [MoP] Furlong HAC Stem Furlong HAC CSF Plus                   | 469    | 3.16 | 2.40 | [ 1.53 , 3.27] | Inferior by $\geq 100\%$  | <0.001 |
| 30 | [MoP] Muller Straight Stem Original ME Muller Low Profile Cup | 474    | 2.09 | 1.33 | [ 0.29 , 2.37] | Inferior by $\geq 20\%$   | 0.012  |
| 31 | [MoP] Muller-Biomet Apollo                                    | 714    | 1.85 | 1.09 | [ 0.23 , 1.95] | Inferior by $\geq 20\%$   | 0.013  |
| 32 | [MoP] Omnifit Cemented Stem ODC                               | 495    | 3.36 | 2.60 | [ 1.10 , 4.10] | Inferior by $\geq 100\%$  | 0.001  |
| 33 | [MoP] SL-Plus Cementless Stem EP-Fit Plus                     | 750    | 3.80 | 3.04 | [ 1.92 , 4.16] | Inferior by $\geq 100\%$  | <0.001 |
| 34 | [MoP] SP II Cemented Stem Interplanta                         | 326    | 2.88 | 2.12 | [ 0.52 , 3.72] | Inferior by $\geq 20\%$   | 0.009  |
| 35 | [MoP] Stanmore Modular Stem SHP Cup                           | 352    | 1.24 | 0.48 | [-0.50 , 1.46] | Non-inferiority not shown | 0.338  |
| 36 | [MoP] Stanmore Modular Stem Stanmore-Arcom Cup                | 1,379  | 2.01 | 1.25 | [ 0.59 , 1.90] | Inferior by $\geq 20\%$   | <0.001 |
| 37 | [MoP] Synergy Cementless Stem Reflection Cementless           | 607    | 1.33 | 0.57 | [-0.30 , 1.44] | Non-inferiority not shown | 0.196  |
| 38 | [MoP] Taperloc Cementless Stem Exceed ABT                     | 346    | 2.99 | 2.24 | [ 1.34 , 3.13] | Inferior by $\geq 100\%$  | <0.001 |
| 39 | [MoP] Versys Cementless Stem Trilogy                          | 418    | 4.99 | 4.23 | [ 2.32 , 6.14] | Inferior by $\geq 100\%$  | <0.001 |

**Supplemental table 2d: Difference in Kaplan-Meier failure estimate between a contemporary reference and implants with at least 250 at risk at 10 years since primary in females**

| Stem/cup brand                                                | Number at risk | Cumulative failure (%) | Difference in failure (%) | 95% CI          | Equivalence status        | p-value |
|---------------------------------------------------------------|----------------|------------------------|---------------------------|-----------------|---------------------------|---------|
| [MoP] Exeter V40 Elite Plus Ogee                              | 2,475          | 1.95                   | [REFERENCE]               |                 |                           |         |
| [CoC] ABG II Monolithic Cementless Stem ABG II Cementless Cup | 347            | 3.34                   | 1.38                      | [-0.27 , 3.03]  | Non-inferiority not shown | 0.100   |
| [CoC] Accolade Trident                                        | 255            | 4.07                   | 2.11                      | [ 1.17 , 3.05]  | Inferior by $\geq 20\%$   | <0.001  |
| [CoC] Corail Pinnacle                                         | 523            | 3.61                   | 1.65                      | [ 1.01 , 2.30]  | Inferior by $\geq 20\%$   | <0.001  |
| [CoC] Exeter V40 ABG II Cementless Cup                        | 302            | 2.63                   | 0.67                      | [-0.64 , 1.98]  | Non-inferiority not shown | 0.317   |
| [CoC] Exeter V40 Trident                                      | 1,079          | 2.45                   | 0.50                      | [-0.11 , 1.11]  | Non-inferiority not shown | 0.106   |
| [CoC] Furlong HAC Stem CSF                                    | 470            | 4.44                   | 2.49                      | [ 1.01 , 3.97]  | Inferior by $\geq 20\%$   | 0.001   |
| [CoP] Exeter V40 Trilogy                                      | 300            | 1.58                   | -0.37                     | [-1.28 , 0.53]  | Non-inferiority not shown | 0.417   |
| [CoP] Furlong HAC Stem CSF                                    | 1,467          | 3.08                   | 1.12                      | [ 0.42 , 1.82]  | Inferior by $\geq 20\%$   | 0.002   |
| [MoP] C-Stem Cemented Stem Charnley and Elite Plus LPW        | 534            | 2.79                   | 0.84                      | [-0.21 , 1.88]  | Non-inferiority not shown | 0.117   |
| [MoP] C-Stem Cemented Stem Elite Plus Ogee                    | 570            | 2.48                   | 0.53                      | [-0.41 , 1.46]  | Non-inferiority not shown | 0.271   |
| [MoP] CPT Elite Plus Ogee                                     | 256            | 2.80                   | 0.85                      | [-0.31 , 2.01]  | Non-inferiority not shown | 0.151   |
| [MoP] CPT Trilogy                                             | 754            | 4.11                   | 2.16                      | [ 1.31 , 3.01]  | Inferior by $\geq 20\%$   | <0.001  |
| [MoP] CPT ZCA                                                 | 903            | 3.43                   | 1.48                      | [ 0.76 , 2.19]  | Inferior by $\geq 20\%$   | <0.001  |
| [MoP] Charnley Cemented Stem Charnley Cemented Cup            | 1,136          | 2.83                   | 0.88                      | [ 0.10 , 1.66]  | Non-inferiority not shown | 0.027   |
| [MoP] Charnley Cemented Stem Charnley Ogee                    | 1,951          | 3.23                   | 1.28                      | [ 0.63 , 1.92]  | Inferior by $\geq 20\%$   | <0.001  |
| [MoP] Charnley Cemented Stem Charnley and Elite Plus LPW      | 1,623          | 2.23                   | 0.28                      | [-0.34 , 0.90]  | Non-inferiority not shown | 0.376   |
| [MoP] Charnley Cemented Stem Wroblewski Golf Ball             | 252            | 2.62                   | 0.67                      | [-0.81 , 2.14]  | Non-inferiority not shown | 0.375   |
| [MoP] Corail Duraloc Cementless Cup                           | 783            | 4.61                   | 2.66                      | [ 1.62 , 3.70]  | Inferior by $\geq 20\%$   | <0.001  |
| [MoP] Corail Pinnacle                                         | 1,043          | 2.78                   | 0.83                      | [ 0.28 , 1.38]  | Non-inferiority not shown | 0.003   |
| [MoP] Exeter V40 ABG II Cementless Cup                        | 279            | 1.55                   | -0.40                     | [-1.60 , 0.80]  | Non-inferiority not shown | 0.515   |
| [MoP] Exeter V40 Cenator Cemented Cup                         | 468            | 2.50                   | 0.55                      | [-0.36 , 1.45]  | Non-inferiority not shown | 0.239   |
| [MoP] Exeter V40 Charnley Ogee                                | 434            | 1.39                   | -0.56                     | [-1.32 , 0.20]  | Non-inferior              | 0.146   |
| [MoP] Exeter V40 Charnley and Elite Plus LPW                  | 292            | 2.60                   | 0.65                      | [-0.30 , 1.60]  | Non-inferiority not shown | 0.180   |
| [MoP] Exeter V40 Duraloc Cementless Cup                       | 301            | 3.88                   | 1.92                      | [ 0.23 , 3.62]  | Non-inferiority not shown | 0.026   |
| [MoP] Exeter V40 Elite Plus Cemented Cup                      | 480            | 1.04                   | -0.91                     | [-1.55 , -0.28] | Non-inferior              | 0.005   |
| [MoP] Exeter V40 Exeter Contemporary Flanged                  | 3,136          | 1.98                   | 0.02                      | [-0.39 , 0.43]  | Non-inferiority not shown | 0.919   |
| [MoP] Exeter V40 Exeter Contemporary Hooded                   | 1,595          | 4.09                   | 2.14                      | [ 1.52 , 2.75]  | Inferior by $\geq 20\%$   | <0.001  |
| [MoP] Exeter V40 Exeter Duration                              | 2,079          | 3.16                   | 1.21                      | [ 0.64 , 1.78]  | Inferior by $\geq 20\%$   | <0.001  |
| [MoP] Exeter V40 Opera                                        | 315            | 2.79                   | 0.83                      | [-0.44 , 2.11]  | Non-inferiority not shown | 0.200   |
| [MoP] Exeter V40 Trident                                      | 714            | 2.63                   | 0.68                      | [ 0.06 , 1.29]  | Non-inferiority not shown | 0.031   |
| [MoP] Exeter V40 Trilogy                                      | 955            | 2.15                   | 0.20                      | [-0.40 , 0.80]  | Non-inferiority not shown | 0.518   |
| [MoP] Exeter V40 Ultima Cemented Cup                          | 334            | 2.65                   | 0.70                      | [-0.55 , 1.94]  | Non-inferiority not shown | 0.275   |
| [MoP] Furlong Cemented Stem JRI Cemented Cup                  | 413            | 3.49                   | 1.53                      | [ 0.20 , 2.87]  | Non-inferiority not shown | 0.024   |
| [MoP] Furlong HAC Stem CSF                                    | 1,088          | 4.21                   | 2.25                      | [ 1.46 , 3.04]  | Inferior by $\geq 20\%$   | <0.001  |
| [MoP] Muller-Biomet Apollo                                    | 256            | 2.18                   | 0.23                      | [-0.84 , 1.30]  | Non-inferiority not shown | 0.673   |
| [MoP] Omnifit Cemented Stem ODC                               | 321            | 4.49                   | 2.54                      | [ 0.76 , 4.32]  | Inferior by $\geq 20\%$   | 0.005   |
| [MoP] Stanmore Modular Stem Stanmore-Arcom Cup                | 489            | 2.78                   | 0.83                      | [-0.01 , 1.66]  | Non-inferiority not shown | 0.052   |
| [MoP] Versys Cementless Stem Trilogy                          | 263            | 5.52                   | 3.57                      | [ 1.54 , 5.60]  | Inferior by $\geq 20\%$   | 0.001   |

1  
2  
3  
4  
5  
6  
7  
8  
9  
10  
11  
12  
13  
14  
15  
16  
17  
18  
19  
20  
21  
22  
23  
24  
25  
26  
27  
28  
29  
30  
31  
32  
33  
34  
35  
36  
37  
38  
39  
40  
41  
42  
43  
44  
45  
46

For peer review only



**Supplemental table 3a: Difference in Kaplan-Meier failure estimate between a contemporary reference and implants with at least 250 at risk at 3 years since primary in females <55 years**

| Stem/cup brand                               | Number at risk | Cumulative failure (%) | Difference in failure (%) | 95% CI         | Equivalence status        | p-value |
|----------------------------------------------|----------------|------------------------|---------------------------|----------------|---------------------------|---------|
| [CoC] Exeter V40 Trident                     | 1,785          | 0.79                   | [REFERENCE]               |                |                           |         |
| [CoC] Accolade Trident                       | 865            | 2.12                   | 1.33                      | [ 0.33 , 2.33] | Inferior by $\geq 20\%$   | 0.009   |
| [CoC] Corail DeltaMotion                     | 342            | 1.53                   | 0.74                      | [-0.54 , 2.02] | Non-inferiority not shown | 0.256   |
| [CoC] Corail Pinnacle                        | 4,110          | 2.15                   | 1.36                      | [ 0.81 , 1.92] | Inferior by $\geq 100\%$  | <0.001  |
| [CoC] Furlong HAC Stem Furlong HAC CSF Plus  | 969            | 1.57                   | 0.78                      | [-0.01 , 1.57] | Non-inferiority not shown | 0.052   |
| [CoC] M/L Taper Cementless Continuum         | 324            | 1.22                   | 0.43                      | [-0.70 , 1.57] | Non-inferiority not shown | 0.456   |
| [CoC] Taperloc Cementless Stem Exceed ABT    | 964            | 1.23                   | 0.44                      | [-0.27 , 1.16] | Non-inferiority not shown | 0.225   |
| [CoP] Accolade Trident                       | 313            | 1.01                   | 0.22                      | [-0.67 , 1.12] | Non-inferiority not shown | 0.629   |
| [CoP] C-Stem Cemented Stem Marathon          | 251            | 1.23                   | 0.44                      | [-0.71 , 1.58] | Non-inferiority not shown | 0.457   |
| [CoP] Corail Pinnacle                        | 720            | 1.95                   | 1.16                      | [ 0.31 , 2.00] | Inferior by $\geq 20\%$   | 0.007   |
| [CoP] Exeter V40 Exeter X3 Rimfit            | 309            | 1.29                   | 0.50                      | [-0.55 , 1.56] | Non-inferiority not shown | 0.351   |
| [CoP] Exeter V40 Trident                     | 493            | 1.06                   | 0.27                      | [-0.51 , 1.05] | Non-inferiority not shown | 0.501   |
| [CoP] Furlong HAC Stem CSF                   | 259            | 1.81                   | 1.02                      | [-0.60 , 2.64] | Non-inferiority not shown | 0.217   |
| [MoP] Accolade Trident                       | 256            | 1.87                   | 1.08                      | [-0.45 , 2.61] | Non-inferiority not shown | 0.168   |
| [MoP] Corail Pinnacle                        | 594            | 1.73                   | 0.94                      | [-0.05 , 1.93] | Non-inferiority not shown | 0.062   |
| [MoP] Exeter V40 Exeter Contemporary Flanged | 366            | 0.56                   | -0.23                     | [-0.97 , 0.50] | Non-inferiority not shown | 0.535   |
| [MoP] Exeter V40 Trident                     | 344            | 1.05                   | 0.26                      | [-0.74 , 1.27] | Non-inferiority not shown | 0.610   |

**Supplemental table 3b: Difference in Kaplan-Meier failure estimate between a contemporary reference and implants with at least 250 at risk at 5 years since primary in females <55 years**

| Stem/cup brand                               | Number at risk | Cumulative failure (%) | Difference in failure (%) | 95% CI         | Equivalence status        | p-value |
|----------------------------------------------|----------------|------------------------|---------------------------|----------------|---------------------------|---------|
| [CoC] Exeter V40 Trident                     | 1,426          | 1.17                   | [REFERENCE]               |                |                           |         |
| [CoC] Accolade Trident                       | 669            | 2.64                   | 1.47                      | [ 0.31 , 2.62] | Inferior by $\geq 20\%$   | 0.013   |
| [CoC] Corail Pinnacle                        | 2,754          | 2.93                   | 1.76                      | [ 1.07 , 2.45] | Inferior by $\geq 20\%$   | <0.001  |
| [CoC] Furlong HAC Stem Furlong HAC CSF Plus  | 610            | 1.82                   | 0.65                      | [-0.26 , 1.57] | Non-inferiority not shown | 0.161   |
| [CoC] Taperloc Cementless Stem Exceed ABT    | 557            | 2.05                   | 0.88                      | [-0.11 , 1.86] | Non-inferiority not shown | 0.080   |
| [CoP] Corail Pinnacle                        | 369            | 2.59                   | 1.42                      | [ 0.33 , 2.52] | Inferior by $\geq 20\%$   | 0.011   |
| [MoP] Corail Pinnacle                        | 365            | 2.65                   | 1.48                      | [ 0.18 , 2.78] | Non-inferiority not shown | 0.026   |
| [MoP] Exeter V40 Exeter Contemporary Flanged | 279            | 1.81                   | 0.64                      | [-0.82 , 2.10] | Non-inferiority not shown | 0.391   |

**Supplemental table 3c: Difference in Kaplan-Meier failure estimate between a contemporary reference and implants with at least 250 at risk at 7 years since primary in females <55 years**

| Stem/cup brand           | Number at risk | Cumulative failure (%) | Difference in failure (%) | 95% CI          | Equivalence status        | p-value |
|--------------------------|----------------|------------------------|---------------------------|-----------------|---------------------------|---------|
| [CoC] Corail Pinnacle    | 1,321          | 3.60                   | [REFERENCE]               |                 |                           |         |
| [CoC] Accolade Trident   | 370            | 3.66                   | 0.06                      | [-1.38 , 1.51]  | Non-inferiority not shown | 0.930   |
| [CoC] Exeter V40 Trident | 982            | 2.07                   | -1.53                     | [-2.47 , -0.60] | Non-inferior              | 0.001   |

For peer review only

**Supplemental table 4a: Difference in Kaplan-Meier failure estimate between a contemporary reference and implants with at least 250 at risk at 3 years since primary in females between 55 and 75 years**

| Stem/cup brand                                                | Number at risk | Cumulative failure (%) | Difference in failure (%) | 95% CI         | Equivalence status        | p-value |
|---------------------------------------------------------------|----------------|------------------------|---------------------------|----------------|---------------------------|---------|
| [MoP] Exeter V40 Elite Plus Cemented Cup                      | 1,360          | 0.44                   | [REFERENCE]               |                |                           |         |
| [CoC] ABG II Monolithic Cementless Stem ABG II Cementless Cup | 375            | 1.57                   | 1.13                      | [-0.16 , 2.42] | Non-inferiority not shown | 0.087   |
| [CoC] ABG II Monolithic Cementless Stem Trident               | 325            | 2.05                   | 1.61                      | [ 0.07 , 3.14] | Non-inferiority not shown | 0.041   |
| [CoC] Accolade Trident                                        | 2,547          | 1.62                   | 1.18                      | [ 0.60 , 1.75] | Inferior by $\geq 100\%$  | <0.001  |
| [CoC] Bimetric Cementless Stem Exceed ABT                     | 407            | 1.48                   | 1.04                      | [-0.10 , 2.17] | Non-inferiority not shown | 0.074   |
| [CoC] C-Stem AMT Cemented Stem Pinnacle                       | 368            | 1.00                   | 0.56                      | [-0.38 , 1.50] | Non-inferiority not shown | 0.245   |
| [CoC] CPT Continuum                                           | 275            | 0.90                   | 0.45                      | [-0.61 , 1.52] | Non-inferiority not shown | 0.405   |
| [CoC] Corail Delta TT                                         | 293            | 2.02                   | 1.58                      | [ 0.29 , 2.86] | Inferior by $\geq 20\%$   | 0.016   |
| [CoC] Corail DeltaMotion                                      | 347            | 0.95                   | 0.51                      | [-0.48 , 1.50] | Non-inferiority not shown | 0.312   |
| [CoC] Corail Duraloc Option                                   | 382            | 1.52                   | 1.08                      | [-0.17 , 2.33] | Non-inferiority not shown | 0.092   |
| [CoC] Corail Pinnacle                                         | 9,567          | 1.41                   | 0.97                      | [ 0.57 , 1.36] | Inferior by $\geq 100\%$  | <0.001  |
| [CoC] Excia Cementless Plasmacup SC                           | 325            | 1.03                   | 0.58                      | [-0.48 , 1.64] | Non-inferiority not shown | 0.281   |
| [CoC] Exeter V40 ABG II Cementless Cup                        | 640            | 0.41                   | -0.03                     | [-0.60 , 0.54] | Non-inferiority not shown | 0.909   |
| [CoC] Exeter V40 Trident                                      | 3,977          | 0.95                   | 0.50                      | [ 0.07 , 0.94] | Non-inferiority not shown | 0.024   |
| [CoC] Furlong HAC Stem CSF                                    | 620            | 1.73                   | 1.28                      | [ 0.22 , 2.34] | Inferior by $\geq 20\%$   | 0.018   |
| [CoC] Furlong HAC Stem Furlong HAC CSF Plus                   | 3,449          | 1.59                   | 1.15                      | [ 0.66 , 1.63] | Inferior by $\geq 100\%$  | <0.001  |
| [CoC] M/L Taper Cementless Continuum                          | 363            | 1.61                   | 1.16                      | [ 0.01 , 2.32] | Non-inferiority not shown | 0.048   |
| [CoC] Metafix Stem Trinity                                    | 290            | 1.39                   | 0.94                      | [-0.16 , 2.04] | Non-inferiority not shown | 0.093   |
| [CoC] Polarstem Cementless R3 Cementless                      | 370            | 0.84                   | 0.40                      | [-0.49 , 1.29] | Non-inferiority not shown | 0.377   |
| [CoC] SL-Plus Cementless Stem EP-Fit Plus                     | 376            | 1.53                   | 1.09                      | [-0.17 , 2.34] | Non-inferiority not shown | 0.091   |
| [CoC] Taperloc Cementless Stem Exceed ABT                     | 2,580          | 1.46                   | 1.01                      | [ 0.50 , 1.53] | Inferior by $\geq 100\%$  | <0.001  |
| [CoP] Accolade Trident                                        | 1,324          | 1.44                   | 0.99                      | [ 0.36 , 1.63] | Inferior by $\geq 20\%$   | 0.002   |
| [CoP] C-Stem Cemented Stem Elite Plus Ogee                    | 279            | 0.35                   | -0.09                     | [-0.85 , 0.66] | Non-inferiority not shown | 0.807   |
| [CoP] C-Stem Cemented Stem Marathon                           | 364            | 0.59                   | 0.15                      | [-0.62 , 0.91] | Non-inferiority not shown | 0.706   |
| [CoP] C-Stem Cemented Stem Opera                              | 295            | 0.00                   | --                        | [ -- , --]     | No failures to date       |         |
| [CoP] C-Stem Cemented Stem Wroblewski Golf Ball               | 346            | 0.53                   | 0.08                      | [-0.72 , 0.89] | Non-inferiority not shown | 0.836   |
| [CoP] CPT Trilogy                                             | 573            | 1.20                   | 0.75                      | [ 0.13 , 1.38] | Inferior by $\geq 20\%$   | 0.018   |
| [CoP] Corail Charnley and Elite Plus LPW                      | 296            | 2.41                   | 1.97                      | [ 0.28 , 3.65] | Inferior by $\geq 20\%$   | 0.022   |
| [CoP] Corail Marathon                                         | 559            | 0.73                   | 0.29                      | [-0.35 , 0.93] | Non-inferiority not shown | 0.378   |
| [CoP] Corail Pinnacle                                         | 3,489          | 1.19                   | 0.75                      | [ 0.33 , 1.17] | Inferior by $\geq 20\%$   | <0.001  |
| [CoP] Corail Trilogy                                          | 355            | 0.81                   | 0.37                      | [-0.60 , 1.34] | Non-inferiority not shown | 0.460   |
| [CoP] Exeter V40 Charnley and Elite Plus LPW                  | 355            | 1.69                   | 1.24                      | [ 0.03 , 2.45] | Non-inferiority not shown | 0.044   |
| [CoP] Exeter V40 Elite Plus Ogee                              | 529            | 0.70                   | 0.26                      | [-0.44 , 0.95] | Non-inferiority not shown | 0.468   |
| [CoP] Exeter V40 Exeter Contemporary Flanged                  | 1,464          | 1.06                   | 0.62                      | [ 0.05 , 1.18] | Non-inferiority not shown | 0.032   |
| [CoP] Exeter V40 Exeter Contemporary Hooded                   | 376            | 1.55                   | 1.11                      | [-0.08 , 2.30] | Non-inferiority not shown | 0.068   |
| [CoP] Exeter V40 Exeter Duration                              | 369            | 0.98                   | 0.54                      | [-0.48 , 1.55] | Non-inferiority not shown | 0.299   |
| [CoP] Exeter V40 Exeter X3 Rimfit                             | 896            | 0.66                   | 0.22                      | [-0.27 , 0.70] | Non-inferiority not shown | 0.385   |
| [CoP] Exeter V40 Trident                                      | 2,023          | 1.02                   | 0.57                      | [ 0.12 , 1.03] | Inferior by $\geq 20\%$   | 0.014   |
| [CoP] Exeter V40 Trilogy                                      | 896            | 0.61                   | 0.16                      | [-0.42 , 0.75] | Non-inferiority not shown | 0.587   |
| [CoP] Furlong HAC Stem CSF                                    | 2,797          | 1.29                   | 0.85                      | [ 0.33 , 1.37] | Inferior by $\geq 20\%$   | 0.001   |

|    |                                                            |        |      |       |                |                           |        |
|----|------------------------------------------------------------|--------|------|-------|----------------|---------------------------|--------|
| 1  | [CoP] Furlong HAC Stem Furlong HAC CSF Plus                | 660    | 2.00 | 1.56  | [ 0.58 , 2.54] | Inferior by $\geq 100\%$  | 0.002  |
| 2  | [CoP] MS-30 Original ME Muller Low Profile Cup             | 785    | 0.57 | 0.13  | [-0.47 , 0.73] | Non-inferiority not shown | 0.674  |
| 3  | [CoP] SL-Plus Cementless Stem EP-Fit Plus                  | 368    | 1.82 | 1.38  | [-0.00 , 2.75] | Non-inferiority not shown | 0.050  |
| 4  | [CoP] Taperloc Cementless Stem Exceed ABT                  | 789    | 1.04 | 0.60  | [-0.03 , 1.22] | Non-inferiority not shown | 0.062  |
| 5  | [MoP] Accolade Trident                                     | 3,609  | 1.81 | 1.36  | [ 0.84 , 1.89] | Inferior by $\geq 100\%$  | <0.001 |
| 6  | [MoP] Anthology R3 Cementless                              | 506    | 1.00 | 0.56  | [-0.18 , 1.29] | Non-inferiority not shown | 0.138  |
| 7  | [MoP] C-Stem AMT Cemented Stem Charnley and Elite Plus LPW | 779    | 0.76 | 0.32  | [-0.34 , 0.97] | Non-inferiority not shown | 0.341  |
| 8  | [MoP] C-Stem AMT Cemented Stem Elite Plus Ogee             | 482    | 0.79 | 0.35  | [-0.43 , 1.12] | Non-inferiority not shown | 0.380  |
| 9  | [MoP] C-Stem AMT Cemented Stem Marathon                    | 406    | 1.09 | 0.65  | [-0.12 , 1.42] | Non-inferiority not shown | 0.099  |
| 10 | [MoP] C-Stem AMT Cemented Stem Pinnacle                    | 609    | 1.05 | 0.60  | [-0.07 , 1.27] | Non-inferiority not shown | 0.077  |
| 11 | [MoP] C-Stem Cemented Stem Charnley Ogee                   | 400    | 1.80 | 1.35  | [ 0.07 , 2.64] | Non-inferiority not shown | 0.038  |
| 12 | [MoP] C-Stem Cemented Stem Charnley and Elite Plus LPW     | 727    | 1.04 | 0.60  | [-0.19 , 1.39] | Non-inferiority not shown | 0.138  |
| 13 | [MoP] C-Stem Cemented Stem Duraloc Cementless Cup          | 298    | 1.64 | 1.20  | [-0.27 , 2.67] | Non-inferiority not shown | 0.109  |
| 14 | [MoP] C-Stem Cemented Stem Elite Plus Ogee                 | 1,130  | 0.91 | 0.47  | [-0.14 , 1.08] | Non-inferiority not shown | 0.132  |
| 15 | [MoP] C-Stem Cemented Stem Marathon                        | 616    | 0.67 | 0.22  | [-0.37 , 0.82] | Non-inferiority not shown | 0.461  |
| 16 | [MoP] C-Stem Cemented Stem Opera                           | 541    | 0.71 | 0.26  | [-0.50 , 1.03] | Non-inferiority not shown | 0.500  |
| 17 | [MoP] C-Stem Cemented Stem Wroblewski Golf Ball            | 397    | 0.48 | 0.04  | [-0.71 , 0.78] | Non-inferiority not shown | 0.925  |
| 18 | [MoP] CCA Cemented Stem CCB Cup                            | 457    | 0.34 | -0.10 | [-0.68 , 0.47] | Non-inferiority not shown | 0.728  |
| 19 | [MoP] CLS Cementless Stem Allofit                          | 259    | 1.45 | 1.01  | [-0.44 , 2.46] | Non-inferiority not shown | 0.174  |
| 20 | [MoP] CPCS Opera                                           | 488    | 1.19 | 0.75  | [-0.26 , 1.75] | Non-inferiority not shown | 0.145  |
| 21 | [MoP] CPT Allofit                                          | 386    | 0.16 | -0.28 | [-0.74 , 0.17] | Non-inferiority not shown | 0.220  |
| 22 | [MoP] CPT Elite Plus Ogee                                  | 922    | 1.28 | 0.84  | [ 0.07 , 1.61] | Non-inferiority not shown | 0.032  |
| 23 | [MoP] CPT Original ME Muller Low Profile Cup               | 324    | 0.92 | 0.48  | [-0.48 , 1.44] | Non-inferiority not shown | 0.329  |
| 24 | [MoP] CPT Pinnacle                                         | 290    | 0.64 | 0.20  | [-0.75 , 1.15] | Non-inferiority not shown | 0.680  |
| 25 | [MoP] CPT Trabecular Metal Modular Cementless Cup          | 317    | 2.73 | 2.29  | [ 0.72 , 3.86] | Inferior by $\geq 100\%$  | 0.004  |
| 26 | [MoP] CPT Trilogy                                          | 3,394  | 1.23 | 0.79  | [ 0.32 , 1.26] | Inferior by $\geq 20\%$   | 0.001  |
| 27 | [MoP] CPT ZCA                                              | 2,305  | 1.24 | 0.79  | [ 0.28 , 1.31] | Inferior by $\geq 20\%$   | 0.003  |
| 28 | [MoP] Charnley Cemented Stem Charnley Cemented Cup         | 1,559  | 0.98 | 0.54  | [-0.04 , 1.12] | Non-inferiority not shown | 0.069  |
| 29 | [MoP] Charnley Cemented Stem Charnley Ogee                 | 3,266  | 1.18 | 0.73  | [ 0.25 , 1.22] | Inferior by $\geq 20\%$   | 0.003  |
| 30 | [MoP] Charnley Cemented Stem Charnley and Elite Plus LPW   | 2,255  | 0.68 | 0.23  | [-0.24 , 0.70] | Non-inferiority not shown | 0.331  |
| 31 | [MoP] Charnley Cemented Stem Opera                         | 498    | 0.39 | -0.05 | [-0.69 , 0.58] | Non-inferiority not shown | 0.868  |
| 32 | [MoP] Charnley Cemented Stem Wroblewski Golf Ball          | 333    | 1.43 | 0.98  | [-0.30 , 2.27] | Non-inferiority not shown | 0.134  |
| 33 | [MoP] Corail Charnley and Elite Plus LPW                   | 334    | 0.23 | -0.21 | [-0.77 , 0.35] | Non-inferiority not shown | 0.454  |
| 34 | [MoP] Corail Duraloc Cementless Cup                        | 1,523  | 1.59 | 1.14  | [ 0.44 , 1.84] | Inferior by $\geq 20\%$   | 0.001  |
| 35 | [MoP] Corail Elite Plus Cemented Cup                       | 354    | 0.25 | -0.20 | [-0.78 , 0.39] | Non-inferiority not shown | 0.510  |
| 36 | [MoP] Corail Elite Plus Ogee                               | 546    | 1.03 | 0.58  | [-0.24 , 1.41] | Non-inferiority not shown | 0.167  |
| 37 | [MoP] Corail Marathon                                      | 1,156  | 0.74 | 0.30  | [-0.21 , 0.80] | Non-inferiority not shown | 0.246  |
| 38 | [MoP] Corail Pinnacle                                      | 11,626 | 1.15 | 0.71  | [ 0.34 , 1.08] | Inferior by $\geq 20\%$   | <0.001 |
| 39 | [MoP] Corail Trilogy                                       | 680    | 0.78 | 0.34  | [-0.37 , 1.04] | Non-inferiority not shown | 0.350  |
| 40 | [MoP] Exeter V40 ABG II Cementless Cup                     | 288    | 1.01 | 0.56  | [-0.62 , 1.74] | Non-inferiority not shown | 0.351  |
| 41 | [MoP] Exeter V40 Cenator Cemented Cup                      | 721    | 1.68 | 1.24  | [ 0.27 , 2.20] | Inferior by $\geq 20\%$   | 0.012  |
| 42 | [MoP] Exeter V40 Charnley Ogee                             | 658    | 1.07 | 0.63  | [-0.18 , 1.44] | Non-inferiority not shown | 0.129  |
| 43 | [MoP] Exeter V40 Charnley and Elite Plus LPW               | 943    | 1.27 | 0.82  | [ 0.11 , 1.54] | Inferior by $\geq 20\%$   | 0.025  |
| 44 | [MoP] Exeter V40 Duraloc Cementless Cup                    | 509    | 0.77 | 0.33  | [-0.49 , 1.15] | Non-inferiority not shown | 0.437  |
| 45 | [MoP] Exeter V40 EP-Fit Plus                               | 265    | 1.11 | 0.67  | [-0.63 , 1.96] | Non-inferiority not shown | 0.312  |
| 46 | [MoP] Exeter V40 Elite Plus Ogee                           | 5,613  | 0.77 | 0.33  | [-0.07 , 0.72] | Non-inferiority not shown | 0.103  |

|    |                                                               |        |      |      |                 |                           |        |
|----|---------------------------------------------------------------|--------|------|------|-----------------|---------------------------|--------|
| 1  | [MoP] Exeter V40 Exeter Contemporary Flanged                  | 14,698 | 0.81 | 0.36 | [ 0.01 , 0.72]  | Non-inferiority not shown | 0.043  |
| 2  | [MoP] Exeter V40 Exeter Contemporary Hooded                   | 5,787  | 1.59 | 1.14 | [ 0.70 , 1.58]  | Inferior by $\geq 100\%$  | <0.001 |
| 3  | [MoP] Exeter V40 Exeter Duration                              | 4,914  | 1.14 | 0.70 | [ 0.26 , 1.13]  | Inferior by $\geq 20\%$   | 0.002  |
| 4  | [MoP] Exeter V40 Exeter X3 Rimfit                             | 1,966  | 0.71 | 0.27 | [ -0.15 , 0.68] | Non-inferiority not shown | 0.210  |
| 5  | [MoP] Exeter V40 Marathon                                     | 486    | 0.87 | 0.42 | [ -0.31 , 1.16] | Non-inferiority not shown | 0.261  |
| 6  | [MoP] Exeter V40 Opera                                        | 876    | 0.86 | 0.41 | [ -0.26 , 1.09] | Non-inferiority not shown | 0.232  |
| 7  | [MoP] Exeter V40 Pinnacle                                     | 1,011  | 1.06 | 0.61 | [ -0.02 , 1.25] | Non-inferiority not shown | 0.058  |
| 8  | [MoP] Exeter V40 Reflection Cementless                        | 785    | 0.74 | 0.30 | [ -0.38 , 0.97] | Non-inferiority not shown | 0.389  |
| 9  | [MoP] Exeter V40 Trident                                      | 6,447  | 1.11 | 0.67 | [ 0.28 , 1.06]  | Inferior by $\geq 20\%$   | 0.001  |
| 10 | [MoP] Exeter V40 Trilogy                                      | 3,453  | 0.79 | 0.34 | [ -0.09 , 0.77] | Non-inferiority not shown | 0.119  |
| 11 | [MoP] Exeter V40 Ultima Cemented Cup                          | 425    | 1.38 | 0.93 | [ -0.21 , 2.08] | Non-inferiority not shown | 0.109  |
| 12 | [MoP] Furlong Cemented Stem JRI Cemented Cup                  | 495    | 1.90 | 1.46 | [ 0.24 , 2.67]  | Inferior by $\geq 20\%$   | 0.019  |
| 13 | [MoP] Furlong HAC Stem CSF                                    | 2,428  | 1.91 | 1.47 | [ 0.85 , 2.08]  | Inferior by $\geq 100\%$  | <0.001 |
| 14 | [MoP] Furlong HAC Stem Furlong HAC CSF Plus                   | 1,020  | 1.79 | 1.35 | [ 0.60 , 2.10]  | Inferior by $\geq 100\%$  | <0.001 |
| 15 | [MoP] M/L Taper Cementless Continuum                          | 253    | 1.51 | 1.07 | [ -0.14 , 2.28] | Non-inferiority not shown | 0.084  |
| 16 | [MoP] Muller Straight Stem Original ME Muller Low Profile Cup | 530    | 1.06 | 0.62 | [ -0.24 , 1.47] | Non-inferiority not shown | 0.157  |
| 17 | [MoP] Muller-Biomet Apollo                                    | 634    | 1.93 | 1.49 | [ 0.40 , 2.58]  | Inferior by $\geq 20\%$   | 0.008  |
| 18 | [MoP] Muller-Biomet Original ME Muller Low Profile Cup        | 362    | 1.57 | 1.12 | [ -0.16 , 2.41] | Non-inferiority not shown | 0.087  |
| 19 | [MoP] Omnifit Cemented Stem ODC                               | 358    | 1.63 | 1.19 | [ -0.15 , 2.53] | Non-inferiority not shown | 0.081  |
| 20 | [MoP] Polarstem Cementless R3 Cementless                      | 355    | 0.64 | 0.20 | [ -0.35 , 0.75] | Non-inferiority not shown | 0.479  |
| 21 | [MoP] SL-Plus Cementless Stem EP-Fit Plus                     | 857    | 3.12 | 2.68 | [ 1.56 , 3.79]  | Inferior by $\geq 100\%$  | <0.001 |
| 22 | [MoP] SP II Cemented Stem Interplanta                         | 258    | 2.11 | 1.67 | [ -0.04 , 3.37] | Non-inferiority not shown | 0.055  |
| 23 | [MoP] Stanmore Modular Stem SHP Cup                           | 298    | 0.89 | 0.44 | [ -0.61 , 1.49] | Non-inferiority not shown | 0.411  |
| 24 | [MoP] Stanmore Modular Stem Stanmore-Arcom Cup                | 1,365  | 1.33 | 0.89 | [ 0.22 , 1.56]  | Inferior by $\geq 20\%$   | 0.009  |
| 25 | [MoP] Synergy Cementless Stem R3 Cementless                   | 363    | 0.63 | 0.19 | [ -0.46 , 0.83] | Non-inferiority not shown | 0.571  |
| 26 | [MoP] Synergy Cementless Stem Reflection Cementless           | 598    | 0.81 | 0.37 | [ -0.41 , 1.15] | Non-inferiority not shown | 0.357  |
| 27 | [MoP] Taperloc Cementless Stem Exceed ABT                     | 1,475  | 2.08 | 1.63 | [ 0.94 , 2.33]  | Inferior by $\geq 100\%$  | <0.001 |
| 28 | [MoP] Versys Cementless Stem Trilogy                          | 363    | 3.38 | 2.94 | [ 1.10 , 4.78]  | Inferior by $\geq 100\%$  | 0.002  |

**Supplemental table 4b: Difference in Kaplan-Meier failure estimate between a contemporary reference and implants with at least 250 at risk at 5 years since primary in females between 55 and 75 years**

| Stem/cup brand                                                | Number at risk | Cumulative failure (%) | Difference in failure (%) | 95% CI          | Equivalence status        | p-value |
|---------------------------------------------------------------|----------------|------------------------|---------------------------|-----------------|---------------------------|---------|
| [MoP] Exeter V40 Elite Plus Cemented Cup                      | 1,039          | 0.52                   | [REFERENCE]               |                 |                           |         |
| [CoC] ABG II Monolithic Cementless Stem ABG II Cementless Cup | 363            | 1.84                   | 1.32                      | [ -0.08 , 2.71] | Non-inferiority not shown | 0.064   |
| [CoC] ABG II Monolithic Cementless Stem Trident               | 250            | 3.09                   | 2.57                      | [ 0.64 , 4.49]  | Inferior by $\geq 100\%$  | 0.009   |
| [CoC] Accolade Trident                                        | 2,044          | 2.56                   | 2.04                      | [ 1.33 , 2.75]  | Inferior by $\geq 100\%$  | <0.001  |
| [CoC] Bimetric Cementless Stem Exceed ABT                     | 289            | 2.32                   | 1.80                      | [ 0.32 , 3.28]  | Inferior by $\geq 20\%$   | 0.017   |
| [CoC] Corail Duraloc Option                                   | 370            | 2.82                   | 2.30                      | [ 0.62 , 3.99]  | Inferior by $\geq 100\%$  | 0.007   |
| [CoC] Corail Pinnacle                                         | 6,445          | 1.82                   | 1.30                      | [ 0.86 , 1.74]  | Inferior by $\geq 100\%$  | <0.001  |

|    |                                                            |       |      |      |                |                           |        |
|----|------------------------------------------------------------|-------|------|------|----------------|---------------------------|--------|
| 1  | [CoC] Exeter V40 ABG II Cementless Cup                     | 563   | 1.05 | 0.53 | [-0.33 , 1.38] | Non-inferiority not shown | 0.225  |
| 2  | [CoC] Exeter V40 Trident                                   | 3,263 | 1.29 | 0.77 | [ 0.27 , 1.26] | Inferior by $\geq 20\%$   | 0.002  |
| 3  | [CoC] Furlong HAC Stem CSF                                 | 597   | 2.05 | 1.53 | [ 0.37 , 2.68] | Inferior by $\geq 20\%$   | 0.010  |
| 4  | [CoC] Furlong HAC Stem Furlong HAC CSF Plus                | 2,167 | 1.86 | 1.34 | [ 0.80 , 1.88] | Inferior by $\geq 100\%$  | <0.001 |
| 5  | [CoC] SL-Plus Cementless Stem EP-Fit Plus                  | 352   | 3.15 | 2.63 | [ 0.84 , 4.43] | Inferior by $\geq 100\%$  | 0.004  |
| 6  | [CoC] Taperloc Cementless Stem Exceed ABT                  | 1,583 | 1.68 | 1.16 | [ 0.59 , 1.72] | Inferior by $\geq 100\%$  | <0.001 |
| 7  | [CoP] Accolade Trident                                     | 638   | 1.84 | 1.32 | [ 0.56 , 2.08] | Inferior by $\geq 100\%$  | 0.001  |
| 8  | [CoP] C-Stem Cemented Stem Wroblewski Golf Ball            | 283   | 0.82 | 0.30 | [-0.69 , 1.30] | Non-inferiority not shown | 0.549  |
| 9  | [CoP] Corail Pinnacle                                      | 1,874 | 1.58 | 1.06 | [ 0.56 , 1.57] | Inferior by $\geq 100\%$  | <0.001 |
| 10 | [CoP] Corail Trilogy                                       | 327   | 1.09 | 0.57 | [-0.55 , 1.70] | Non-inferiority not shown | 0.317  |
| 11 | [CoP] Exeter V40 Elite Plus Ogee                           | 397   | 1.31 | 0.79 | [-0.20 , 1.77] | Non-inferiority not shown | 0.117  |
| 12 | [CoP] Exeter V40 Exeter Contemporary Flanged               | 964   | 1.38 | 0.86 | [ 0.20 , 1.52] | Inferior by $\geq 20\%$   | 0.011  |
| 13 | [CoP] Exeter V40 Exeter Contemporary Hooded                | 290   | 1.82 | 1.30 | [-0.01 , 2.60] | Non-inferiority not shown | 0.051  |
| 14 | [CoP] Exeter V40 Exeter Duration                           | 325   | 0.98 | 0.46 | [-0.56 , 1.49] | Non-inferiority not shown | 0.377  |
| 15 | [CoP] Exeter V40 Trident                                   | 999   | 1.37 | 0.86 | [ 0.28 , 1.43] | Inferior by $\geq 20\%$   | 0.003  |
| 16 | [CoP] Exeter V40 Trilogy                                   | 748   | 0.72 | 0.20 | [-0.44 , 0.84] | Non-inferiority not shown | 0.540  |
| 17 | [CoP] Furlong HAC Stem CSF                                 | 2,437 | 1.82 | 1.30 | [ 0.69 , 1.90] | Inferior by $\geq 100\%$  | <0.001 |
| 18 | [CoP] Furlong HAC Stem Furlong HAC CSF Plus                | 397   | 2.25 | 1.73 | [ 0.63 , 2.83] | Inferior by $\geq 100\%$  | 0.002  |
| 19 | [CoP] MS-30 Original ME Muller Low Profile Cup             | 576   | 0.72 | 0.21 | [-0.48 , 0.89] | Non-inferiority not shown | 0.557  |
| 20 | [CoP] SL-Plus Cementless Stem EP-Fit Plus                  | 317   | 3.48 | 2.96 | [ 1.07 , 4.86] | Inferior by $\geq 100\%$  | 0.002  |
| 21 | [CoP] Taperloc Cementless Stem Exceed ABT                  | 355   | 1.36 | 0.84 | [ 0.06 , 1.61] | Non-inferiority not shown | 0.035  |
| 22 | [MoP] Accolade Trident                                     | 2,455 | 2.47 | 1.95 | [ 1.34 , 2.56] | Inferior by $\geq 100\%$  | <0.001 |
| 23 | [MoP] C-Stem AMT Cemented Stem Charnley and Elite Plus LPW | 556   | 1.17 | 0.65 | [-0.16 , 1.46] | Non-inferiority not shown | 0.117  |
| 24 | [MoP] C-Stem AMT Cemented Stem Elite Plus Ogee             | 319   | 1.54 | 1.02 | [-0.14 , 2.18] | Non-inferiority not shown | 0.084  |
| 25 | [MoP] C-Stem AMT Cemented Stem Pinnacle                    | 308   | 1.68 | 1.16 | [ 0.17 , 2.14] | Inferior by $\geq 20\%$   | 0.021  |
| 26 | [MoP] C-Stem Cemented Stem Charnley Ogee                   | 335   | 2.64 | 2.12 | [ 0.53 , 3.71] | Inferior by $\geq 100\%$  | 0.009  |
| 27 | [MoP] C-Stem Cemented Stem Charnley and Elite Plus LPW     | 671   | 1.88 | 1.36 | [ 0.32 , 2.41] | Inferior by $\geq 20\%$   | 0.010  |
| 28 | [MoP] C-Stem Cemented Stem Duraloc Cementless Cup          | 285   | 2.32 | 1.80 | [ 0.06 , 3.54] | Non-inferiority not shown | 0.042  |
| 29 | [MoP] C-Stem Cemented Stem Elite Plus Ogee                 | 906   | 1.40 | 0.88 | [ 0.12 , 1.63] | Inferior by $\geq 20\%$   | 0.023  |
| 30 | [MoP] C-Stem Cemented Stem Marathon                        | 330   | 0.67 | 0.15 | [-0.46 , 0.76] | Non-inferiority not shown | 0.633  |
| 31 | [MoP] C-Stem Cemented Stem Opera                           | 407   | 0.90 | 0.38 | [-0.48 , 1.24] | Non-inferiority not shown | 0.390  |
| 32 | [MoP] C-Stem Cemented Stem Wroblewski Golf Ball            | 324   | 1.57 | 1.05 | [-0.25 , 2.36] | Non-inferiority not shown | 0.113  |
| 33 | [MoP] CCA Cemented Stem CCB Cup                            | 327   | 0.61 | 0.09 | [-0.70 , 0.88] | Non-inferiority not shown | 0.827  |
| 34 | [MoP] CPCS Opera                                           | 367   | 2.09 | 1.57 | [ 0.24 , 2.91] | Inferior by $\geq 20\%$   | 0.021  |
| 35 | [MoP] CPT Elite Plus Ogee                                  | 691   | 1.65 | 1.13 | [ 0.25 , 2.01] | Inferior by $\geq 20\%$   | 0.012  |
| 36 | [MoP] CPT Pinnacle                                         | 254   | 1.40 | 0.88 | [-0.53 , 2.29] | Non-inferiority not shown | 0.223  |
| 37 | [MoP] CPT Trilogy                                          | 2,468 | 2.22 | 1.70 | [ 1.10 , 2.30] | Inferior by $\geq 100\%$  | <0.001 |
| 38 | [MoP] CPT ZCA                                              | 1,787 | 2.02 | 1.50 | [ 0.84 , 2.15] | Inferior by $\geq 100\%$  | <0.001 |
| 39 | [MoP] Charnley Cemented Stem Charnley Cemented Cup         | 1,420 | 1.52 | 1.00 | [ 0.30 , 1.70] | Inferior by $\geq 20\%$   | 0.005  |
| 40 | [MoP] Charnley Cemented Stem Charnley Ogee                 | 2,959 | 1.84 | 1.32 | [ 0.74 , 1.90] | Inferior by $\geq 100\%$  | <0.001 |
| 41 | [MoP] Charnley Cemented Stem Charnley and Elite Plus LPW   | 2,049 | 1.18 | 0.67 | [ 0.09 , 1.24] | Non-inferiority not shown | 0.023  |
| 42 | [MoP] Charnley Cemented Stem Opera                         | 454   | 1.22 | 0.70 | [-0.34 , 1.73] | Non-inferiority not shown | 0.185  |
| 43 | [MoP] Charnley Cemented Stem Wroblewski Golf Ball          | 277   | 1.77 | 1.26 | [-0.20 , 2.71] | Non-inferiority not shown | 0.091  |
| 44 | [MoP] Corail Duraloc Cementless Cup                        | 1,465 | 2.31 | 1.79 | [ 0.96 , 2.62] | Inferior by $\geq 100\%$  | <0.001 |
| 45 | [MoP] Corail Elite Plus Cemented Cup                       | 277   | 0.55 | 0.03 | [-0.81 , 0.87] | Non-inferiority not shown | 0.947  |
| 46 | [MoP] Corail Elite Plus Ogee                               | 418   | 1.62 | 1.10 | [ 0.03 , 2.17] | Non-inferiority not shown | 0.044  |

|    |                                                               |        |      |      |                |                           |        |
|----|---------------------------------------------------------------|--------|------|------|----------------|---------------------------|--------|
|    | [MoP] Corail Marathon                                         | 586    | 0.96 | 0.44 | [-0.16 , 1.05] | Non-inferiority not shown | 0.153  |
| 1  | [MoP] Corail Pinnacle                                         | 7,089  | 1.41 | 0.89 | [ 0.49 , 1.30] | Inferior by $\geq 20\%$   | <0.001 |
| 2  | [MoP] Corail Trilogy                                          | 561    | 0.94 | 0.42 | [-0.36 , 1.20] | Non-inferiority not shown | 0.293  |
| 3  | [MoP] Exeter V40 ABG II Cementless Cup                        | 283    | 1.01 | 0.49 | [-0.70 , 1.67] | Non-inferiority not shown | 0.422  |
| 4  | [MoP] Exeter V40 Cenator Cemented Cup                         | 611    | 2.67 | 2.15 | [ 0.94 , 3.37] | Inferior by $\geq 100\%$  | <0.001 |
| 5  | [MoP] Exeter V40 Charnley Ogee                                | 568    | 1.39 | 0.87 | [-0.06 , 1.79] | Non-inferiority not shown | 0.068  |
| 6  | [MoP] Exeter V40 Charnley and Elite Plus LPW                  | 718    | 1.72 | 1.20 | [ 0.34 , 2.05] | Inferior by $\geq 20\%$   | 0.006  |
| 7  | [MoP] Exeter V40 Duraloc Cementless Cup                       | 488    | 1.37 | 0.85 | [-0.22 , 1.93] | Non-inferiority not shown | 0.119  |
| 8  | [MoP] Exeter V40 EP-Fit Plus                                  | 250    | 3.01 | 2.49 | [ 0.40 , 4.57] | Inferior by $\geq 20\%$   | 0.019  |
| 9  | [MoP] Exeter V40 Elite Plus Ogee                              | 4,543  | 1.18 | 0.66 | [ 0.21 , 1.12] | Inferior by $\geq 20\%$   | 0.004  |
| 10 | [MoP] Exeter V40 Exeter Contemporary Flanged                  | 10,220 | 1.16 | 0.64 | [ 0.25 , 1.04] | Inferior by $\geq 20\%$   | 0.001  |
| 11 | [MoP] Exeter V40 Exeter Contemporary Hooded                   | 4,277  | 2.45 | 1.93 | [ 1.40 , 2.46] | Inferior by $\geq 100\%$  | <0.001 |
| 12 | [MoP] Exeter V40 Exeter Duration                              | 4,048  | 1.48 | 0.96 | [ 0.47 , 1.44] | Inferior by $\geq 20\%$   | <0.001 |
| 13 | [MoP] Exeter V40 Exeter X3 Rimfit                             | 319    | 0.71 | 0.19 | [-0.25 , 0.63] | Non-inferiority not shown | 0.395  |
| 14 | [MoP] Exeter V40 Opera                                        | 655    | 1.22 | 0.70 | [-0.10 , 1.50] | Non-inferiority not shown | 0.088  |
| 15 | [MoP] Exeter V40 Pinnacle                                     | 658    | 1.40 | 0.88 | [ 0.12 , 1.64] | Inferior by $\geq 20\%$   | 0.023  |
| 16 | [MoP] Exeter V40 Reflection Cementless                        | 732    | 1.14 | 0.62 | [-0.20 , 1.44] | Non-inferiority not shown | 0.141  |
| 17 | [MoP] Exeter V40 Trident                                      | 4,016  | 1.44 | 0.92 | [ 0.47 , 1.36] | Inferior by $\geq 20\%$   | <0.001 |
| 18 | [MoP] Exeter V40 Trilogy                                      | 2,821  | 1.20 | 0.68 | [ 0.17 , 1.18] | Inferior by $\geq 20\%$   | 0.009  |
| 19 | [MoP] Exeter V40 Ultima Cemented Cup                          | 408    | 2.56 | 2.04 | [ 0.51 , 3.58] | Inferior by $\geq 20\%$   | 0.009  |
| 20 | [MoP] Furlong Cemented Stem JRI Cemented Cup                  | 458    | 2.52 | 2.00 | [ 0.60 , 3.41] | Inferior by $\geq 100\%$  | 0.005  |
| 21 | [MoP] Furlong HAC Stem CSF                                    | 2,056  | 2.08 | 1.56 | [ 0.91 , 2.22] | Inferior by $\geq 100\%$  | <0.001 |
| 22 | [MoP] Furlong HAC Stem Furlong HAC CSF Plus                   | 633    | 2.82 | 2.30 | [ 1.26 , 3.34] | Inferior by $\geq 100\%$  | <0.001 |
| 23 | [MoP] Muller Straight Stem Original ME Muller Low Profile Cup | 395    | 1.47 | 0.95 | [-0.08 , 1.98] | Non-inferiority not shown | 0.071  |
| 24 | [MoP] Muller-Biomet Apollo                                    | 535    | 2.11 | 1.59 | [ 0.44 , 2.74] | Inferior by $\geq 20\%$   | 0.007  |
| 25 | [MoP] Omnifit Cemented Stem ODC                               | 340    | 2.48 | 1.96 | [ 0.32 , 3.60] | Inferior by $\geq 20\%$   | 0.019  |
| 26 | [MoP] SL-Plus Cementless Stem EP-Fit Plus                     | 739    | 3.85 | 3.33 | [ 2.07 , 4.59] | Inferior by $\geq 100\%$  | <0.001 |
| 27 | [MoP] Stanmore Modular Stem Stanmore-Arcom Cup                | 1,106  | 2.20 | 1.68 | [ 0.83 , 2.53] | Inferior by $\geq 100\%$  | <0.001 |
| 28 | [MoP] Synergy Cementless Stem Reflection Cementless           | 577    | 1.15 | 0.63 | [-0.29 , 1.55] | Non-inferiority not shown | 0.179  |
| 29 | [MoP] Taperloc Cementless Stem Exceed ABT                     | 761    | 2.49 | 1.97 | [ 1.18 , 2.77] | Inferior by $\geq 100\%$  | <0.001 |
| 30 | [MoP] Versys Cementless Stem Trilogy                          | 342    | 4.74 | 4.22 | [ 2.05 , 6.38] | Inferior by $\geq 100\%$  | <0.001 |



**Supplemental table 4c: Difference in Kaplan-Meier failure estimate between a contemporary reference and implants with at least 250 at risk at 7 years since primary in females between 55 and 75 years**

| Stem/cup brand                                                | Number at risk | Cumulative failure (%) | Difference in failure (%) | 95% CI          | Equivalence status        | p-value |
|---------------------------------------------------------------|----------------|------------------------|---------------------------|-----------------|---------------------------|---------|
| [MoP] Exeter V40 Trilogy                                      | 1,962          | 1.45                   | [REFERENCE]               |                 |                           |         |
| [CoC] ABG II Monolithic Cementless Stem ABG II Cementless Cup | 335            | 2.11                   | 0.66                      | [-0.84 , 2.16]  | Non-inferiority not shown | 0.389   |
| [CoC] Accolade Trident                                        | 1,256          | 3.07                   | 1.62                      | [ 0.81 , 2.44]  | Inferior by $\geq 20\%$   | <0.001  |
| [CoC] Corail Duraloc Option                                   | 301            | 3.15                   | 1.70                      | [-0.11 , 3.50]  | Non-inferiority not shown | 0.065   |
| [CoC] Corail Pinnacle                                         | 2,917          | 2.20                   | 0.76                      | [ 0.25 , 1.26]  | Non-inferiority not shown | 0.004   |
| [CoC] Exeter V40 ABG II Cementless Cup                        | 454            | 1.65                   | 0.20                      | [-0.90 , 1.31]  | Non-inferiority not shown | 0.721   |
| [CoC] Exeter V40 Trident                                      | 2,340          | 1.76                   | 0.31                      | [-0.28 , 0.90]  | Non-inferiority not shown | 0.300   |
| [CoC] Furlong HAC Stem CSF                                    | 549            | 2.90                   | 1.45                      | [ 0.07 , 2.83]  | Non-inferiority not shown | 0.040   |
| [CoC] Furlong HAC Stem Furlong HAC CSF Plus                   | 830            | 2.23                   | 0.78                      | [ 0.12 , 1.44]  | Non-inferiority not shown | 0.021   |
| [CoC] SL-Plus Cementless Stem EP-Fit Plus                     | 295            | 3.46                   | 2.01                      | [ 0.11 , 3.90]  | Non-inferiority not shown | 0.038   |
| [CoC] Taperloc Cementless Stem Exceed ABT                     | 712            | 1.81                   | 0.36                      | [-0.29 , 1.01]  | Non-inferiority not shown | 0.279   |
| [CoP] Accolade Trident                                        | 257            | 2.02                   | 0.57                      | [-0.29 , 1.43]  | Non-inferiority not shown | 0.195   |
| [CoP] Corail Pinnacle                                         | 771            | 1.86                   | 0.41                      | [-0.20 , 1.02]  | Non-inferiority not shown | 0.183   |
| [CoP] Corail Trilogy                                          | 258            | 1.09                   | -0.35                     | [-1.50 , 0.79]  | Non-inferiority not shown | 0.543   |
| [CoP] Exeter V40 Elite Plus Ogee                              | 251            | 1.59                   | 0.15                      | [-1.00 , 1.29]  | Non-inferiority not shown | 0.804   |
| [CoP] Exeter V40 Exeter Contemporary Flanged                  | 563            | 1.38                   | -0.07                     | [-0.76 , 0.61]  | Non-inferiority not shown | 0.839   |
| [CoP] Exeter V40 Exeter Duration                              | 255            | 1.30                   | -0.14                     | [-1.36 , 1.07]  | Non-inferiority not shown | 0.818   |
| [CoP] Exeter V40 Trident                                      | 463            | 1.63                   | 0.19                      | [-0.52 , 0.89]  | Non-inferiority not shown | 0.606   |
| [CoP] Exeter V40 Trilogy                                      | 561            | 1.02                   | -0.43                     | [-1.22 , 0.35]  | Non-inferiority not shown | 0.282   |
| [CoP] Furlong HAC Stem CSF                                    | 2,033          | 2.34                   | 0.90                      | [ 0.20 , 1.60]  | Non-inferiority not shown | 0.012   |
| [CoP] MS-30 Original ME Muller Low Profile Cup                | 374            | 0.72                   | -0.72                     | [-1.43 , -0.01] | Non-inferior              | 0.046   |
| [MoP] Accolade Trident                                        | 1,158          | 3.23                   | 1.79                      | [ 1.03 , 2.54]  | Inferior by $\geq 20\%$   | <0.001  |
| [MoP] C-Stem AMT Cemented Stem Charnley and Elite Plus LPW    | 344            | 1.72                   | 0.28                      | [-0.85 , 1.41]  | Non-inferiority not shown | 0.632   |
| [MoP] C-Stem Cemented Stem Charnley Ogee                      | 284            | 2.97                   | 1.52                      | [-0.20 , 3.24]  | Non-inferiority not shown | 0.084   |
| [MoP] C-Stem Cemented Stem Charnley and Elite Plus LPW        | 617            | 2.66                   | 1.21                      | [-0.04 , 2.46]  | Non-inferiority not shown | 0.058   |
| [MoP] C-Stem Cemented Stem Elite Plus Ogee                    | 733            | 2.13                   | 0.68                      | [-0.29 , 1.65]  | Non-inferiority not shown | 0.170   |
| [MoP] C-Stem Cemented Stem Opera                              | 311            | 1.69                   | 0.24                      | [-1.01 , 1.49]  | Non-inferiority not shown | 0.709   |
| [MoP] CPT Elite Plus Ogee                                     | 470            | 2.58                   | 1.13                      | [-0.08 , 2.34]  | Non-inferiority not shown | 0.067   |
| [MoP] CPT Trilogy                                             | 1,661          | 2.95                   | 1.50                      | [ 0.77 , 2.23]  | Inferior by $\geq 20\%$   | <0.001  |
| [MoP] CPT ZCA                                                 | 1,254          | 2.39                   | 0.94                      | [ 0.20 , 1.68]  | Non-inferiority not shown | 0.013   |
| [MoP] Charnley Cemented Stem Charnley Cemented Cup            | 1,220          | 2.10                   | 0.65                      | [-0.18 , 1.48]  | Non-inferiority not shown | 0.125   |
| [MoP] Charnley Cemented Stem Charnley Ogee                    | 2,422          | 2.20                   | 0.76                      | [ 0.11 , 1.40]  | Non-inferiority not shown | 0.022   |
| [MoP] Charnley Cemented Stem Charnley and Elite Plus LPW      | 1,746          | 1.64                   | 0.20                      | [-0.48 , 0.87]  | Non-inferiority not shown | 0.569   |
| [MoP] Charnley Cemented Stem Opera                            | 345            | 2.16                   | 0.71                      | [-0.68 , 2.10]  | Non-inferiority not shown | 0.316   |
| [MoP] Corail Duraloc Cementless Cup                           | 1,258          | 3.66                   | 2.21                      | [ 1.18 , 3.25]  | Inferior by $\geq 20\%$   | <0.001  |
| [MoP] Corail Elite Plus Ogee                                  | 292            | 1.93                   | 0.48                      | [-0.76 , 1.72]  | Non-inferiority not shown | 0.449   |
| [MoP] Corail Pinnacle                                         | 3,659          | 1.82                   | 0.38                      | [-0.10 , 0.86]  | Non-inferiority not shown | 0.123   |
| [MoP] Corail Trilogy                                          | 369            | 1.65                   | 0.20                      | [-0.93 , 1.34]  | Non-inferiority not shown | 0.725   |
| [MoP] Exeter V40 ABG II Cementless Cup                        | 272            | 1.01                   | -0.44                     | [-1.65 , 0.76]  | Non-inferiority not shown | 0.472   |

|    |                                                               |       |      |       |                 |                           |        |
|----|---------------------------------------------------------------|-------|------|-------|-----------------|---------------------------|--------|
| 1  | [MoP] Exeter V40 Cenator Cemented Cup                         | 478   | 2.86 | 1.41  | [ 0.13 , 2.69]  | Non-inferiority not shown | 0.030  |
| 2  | [MoP] Exeter V40 Charnley Ogee                                | 467   | 1.39 | -0.06 | [-1.01 , 0.89]  | Non-inferiority not shown | 0.897  |
| 3  | [MoP] Exeter V40 Charnley and Elite Plus LPW                  | 470   | 2.39 | 0.94  | [-0.15 , 2.03]  | Non-inferiority not shown | 0.091  |
| 4  | [MoP] Exeter V40 Duraloc Cementless Cup                       | 392   | 1.79 | 0.34  | [-0.89 , 1.56]  | Non-inferiority not shown | 0.589  |
| 5  | [MoP] Exeter V40 Elite Plus Cemented Cup                      | 701   | 0.63 | -0.82 | [-1.40 , -0.23] | Non-inferior              | 0.006  |
| 6  | [MoP] Exeter V40 Elite Plus Ogee                              | 3,436 | 1.59 | 0.14  | [-0.38 , 0.67]  | Non-inferiority not shown | 0.593  |
| 7  | [MoP] Exeter V40 Exeter Contemporary Flanged                  | 6,755 | 1.51 | 0.06  | [-0.39 , 0.52]  | Non-inferiority not shown | 0.788  |
| 8  | [MoP] Exeter V40 Exeter Contemporary Hooded                   | 2,891 | 3.20 | 1.75  | [ 1.12 , 2.38]  | Inferior by $\geq 20\%$   | <0.001 |
| 9  | [MoP] Exeter V40 Exeter Duration                              | 3,049 | 2.17 | 0.72  | [ 0.14 , 1.31]  | Non-inferiority not shown | 0.016  |
| 10 | [MoP] Exeter V40 Opera                                        | 462   | 1.54 | 0.09  | [-0.84 , 1.02]  | Non-inferiority not shown | 0.850  |
| 11 | [MoP] Exeter V40 Pinnacle                                     | 346   | 1.56 | 0.11  | [-0.73 , 0.95]  | Non-inferiority not shown | 0.797  |
| 12 | [MoP] Exeter V40 Reflection Cementless                        | 591   | 2.01 | 0.56  | [-0.53 , 1.65]  | Non-inferiority not shown | 0.312  |
| 13 | [MoP] Exeter V40 Trident                                      | 2,291 | 2.01 | 0.56  | [ 0.01 , 1.11]  | Non-inferiority not shown | 0.046  |
| 14 | [MoP] Exeter V40 Ultima Cemented Cup                          | 379   | 2.80 | 1.36  | [-0.26 , 2.97]  | Non-inferiority not shown | 0.100  |
| 15 | [MoP] Furlong Cemented Stem JRI Cemented Cup                  | 416   | 2.97 | 1.52  | [-0.02 , 3.05]  | Non-inferiority not shown | 0.053  |
| 16 | [MoP] Furlong HAC Stem CSF                                    | 1,634 | 2.65 | 1.20  | [ 0.44 , 1.96]  | Inferior by $\geq 20\%$   | 0.002  |
| 17 | [MoP] Furlong HAC Stem Furlong HAC CSF Plus                   | 270   | 3.32 | 1.87  | [ 0.67 , 3.06]  | Inferior by $\geq 20\%$   | 0.002  |
| 18 | [MoP] Muller Straight Stem Original ME Muller Low Profile Cup | 264   | 2.38 | 0.93  | [-0.53 , 2.40]  | Non-inferiority not shown | 0.211  |
| 19 | [MoP] Muller-Biomet Apollo                                    | 414   | 2.72 | 1.27  | [-0.08 , 2.62]  | Non-inferiority not shown | 0.065  |
| 20 | [MoP] Omnifit Cemented Stem ODC                               | 309   | 3.99 | 2.54  | [ 0.45 , 4.63]  | Inferior by $\geq 20\%$   | 0.017  |
| 21 | [MoP] SL-Plus Cementless Stem EP-Fit Plus                     | 586   | 4.42 | 2.97  | [ 1.59 , 4.36]  | Inferior by $\geq 100\%$  | <0.001 |
| 22 | [MoP] Stanmore Modular Stem Stanmore-Arcom Cup                | 784   | 2.59 | 1.14  | [ 0.19 , 2.09]  | Non-inferiority not shown | 0.018  |
| 23 | [MoP] Synergy Cementless Stem Reflection Cementless           | 432   | 1.74 | 0.29  | [-0.86 , 1.44]  | Non-inferiority not shown | 0.617  |
| 24 | [MoP] Versys Cementless Stem Trilogy                          | 318   | 4.74 | 3.29  | [ 1.11 , 5.46]  | Inferior by $\geq 20\%$   | 0.003  |

**Supplemental table 4d: Difference in Kaplan-Meier failure estimate between a contemporary reference and implants with at least 250 at risk at 10 years since primary in females between 55 and 75 years**

| Stem/cup brand                                                | Number at risk | Cumulative failure (%) | Difference in failure (%) | 95% CI          | Equivalence status        | p-value |
|---------------------------------------------------------------|----------------|------------------------|---------------------------|-----------------|---------------------------|---------|
| [MoP] Exeter V40 Elite Plus Ogee                              | 1,609          | 2.16                   | [REFERENCE]               |                 |                           |         |
| [CoC] ABG II Monolithic Cementless Stem ABG II Cementless Cup | 259            | 2.44                   | 0.28                      | [-1.36 , 1.92]  | Non-inferiority not shown | 0.739   |
| [CoC] Corail Pinnacle                                         | 342            | 2.97                   | 0.81                      | [ 0.10 , 1.52]  | Non-inferiority not shown | 0.025   |
| [CoC] Exeter V40 Trident                                      | 727            | 2.29                   | 0.13                      | [-0.60 , 0.85]  | Non-inferiority not shown | 0.731   |
| [CoC] Furlong HAC Stem CSF                                    | 322            | 3.61                   | 1.45                      | [-0.16 , 3.06]  | Non-inferiority not shown | 0.077   |
| [CoP] Exeter V40 Trilogy                                      | 250            | 1.52                   | -0.64                     | [-1.72 , 0.43]  | Non-inferiority not shown | 0.243   |
| [CoP] Furlong HAC Stem CSF                                    | 1,151          | 3.18                   | 1.02                      | [ 0.17 , 1.88]  | Non-inferiority not shown | 0.019   |
| [MoP] C-Stem Cemented Stem Charnley and Elite Plus LPW        | 376            | 3.32                   | 1.16                      | [-0.26 , 2.57]  | Non-inferiority not shown | 0.108   |
| [MoP] C-Stem Cemented Stem Elite Plus Ogee                    | 373            | 2.97                   | 0.81                      | [-0.42 , 2.04]  | Non-inferiority not shown | 0.198   |
| [MoP] CPT Trilogy                                             | 562            | 4.25                   | 2.09                      | [ 1.06 , 3.12]  | Inferior by $\geq 20\%$   | <0.001  |
| [MoP] CPT ZCA                                                 | 520            | 3.72                   | 1.56                      | [ 0.48 , 2.64]  | Inferior by $\geq 20\%$   | 0.005   |
| [MoP] Charnley Cemented Stem Charnley Cemented Cup            | 782            | 3.09                   | 0.93                      | [-0.10 , 1.96]  | Non-inferiority not shown | 0.076   |
| [MoP] Charnley Cemented Stem Charnley Ogee                    | 1,368          | 3.80                   | 1.64                      | [ 0.77 , 2.51]  | Inferior by $\geq 20\%$   | <0.001  |
| [MoP] Charnley Cemented Stem Charnley and Elite Plus LPW      | 1,079          | 2.64                   | 0.48                      | [-0.38 , 1.34]  | Non-inferiority not shown | 0.275   |
| [MoP] Corail Duraloc Cementless Cup                           | 598            | 5.19                   | 3.03                      | [ 1.73 , 4.32]  | Inferior by $\geq 20\%$   | <0.001  |
| [MoP] Corail Pinnacle                                         | 849            | 2.37                   | 0.21                      | [-0.43 , 0.84]  | Non-inferiority not shown | 0.521   |
| [MoP] Exeter V40 Cenator Cemented Cup                         | 312            | 3.32                   | 1.16                      | [-0.28 , 2.59]  | Non-inferiority not shown | 0.114   |
| [MoP] Exeter V40 Charnley Ogee                                | 312            | 1.39                   | -0.77                     | [-1.74 , 0.19]  | Non-inferior              | 0.116   |
| [MoP] Exeter V40 Duraloc Cementless Cup                       | 257            | 3.96                   | 1.80                      | [-0.21 , 3.82]  | Non-inferiority not shown | 0.079   |
| [MoP] Exeter V40 Elite Plus Cemented Cup                      | 305            | 0.89                   | -1.27                     | [-2.07 , -0.48] | Non-inferior              | 0.002   |
| [MoP] Exeter V40 Exeter Contemporary Flanged                  | 2,152          | 2.29                   | 0.13                      | [-0.43 , 0.70]  | Non-inferiority not shown | 0.644   |
| [MoP] Exeter V40 Exeter Contemporary Hooded                   | 1,110          | 4.86                   | 2.70                      | [ 1.83 , 3.56]  | Inferior by $\geq 20\%$   | <0.001  |
| [MoP] Exeter V40 Exeter Duration                              | 1,344          | 3.44                   | 1.28                      | [ 0.51 , 2.05]  | Inferior by $\geq 20\%$   | 0.001   |
| [MoP] Exeter V40 Trident                                      | 523            | 3.05                   | 0.89                      | [ 0.06 , 1.72]  | Non-inferiority not shown | 0.035   |
| [MoP] Exeter V40 Trilogy                                      | 748            | 2.13                   | -0.03                     | [-0.78 , 0.72]  | Non-inferiority not shown | 0.931   |
| [MoP] Furlong Cemented Stem JRI Cemented Cup                  | 268            | 4.14                   | 1.98                      | [ 0.07 , 3.89]  | Non-inferiority not shown | 0.043   |
| [MoP] Furlong HAC Stem CSF                                    | 726            | 3.72                   | 1.56                      | [ 0.60 , 2.51]  | Inferior by $\geq 20\%$   | 0.001   |
| [MoP] Stanmore Modular Stem Stanmore-Arcom Cup                | 329            | 3.31                   | 1.15                      | [-0.00 , 2.30]  | Non-inferiority not shown | 0.050   |

**Supplemental table 5a: Difference in Kaplan-Meier failure estimate between a contemporary reference and implants with at least 250 at risk at 3 years since primary in females >75 years**

| Stem/cup brand                                             | Number at risk | Cumulative failure (%) | Difference in failure (%) | 95% CI         | Equivalence status        | p-value |
|------------------------------------------------------------|----------------|------------------------|---------------------------|----------------|---------------------------|---------|
| [MoP] Charnley Cemented Stem Charnley and Elite Plus LPW   | 1,794          | 0.55                   | [REFERENCE]               |                |                           |         |
| [CoC] Accolade Trident                                     | 251            | 2.21                   | 1.66                      | [-0.12 , 3.44] | Non-inferiority not shown | 0.067   |
| [CoC] Corail Pinnacle                                      | 757            | 2.22                   | 1.67                      | [ 0.67 , 2.66] | Inferior by $\geq 100\%$  | 0.001   |
| [CoC] Furlong HAC Stem Furlong HAC CSF Plus                | 540            | 0.68                   | 0.13                      | [-0.55 , 0.81] | Non-inferiority not shown | 0.700   |
| [CoP] Corail Pinnacle                                      | 431            | 0.69                   | 0.14                      | [-0.48 , 0.76] | Non-inferiority not shown | 0.653   |
| [CoP] Exeter V40 Trident                                   | 424            | 0.34                   | -0.21                     | [-0.72 , 0.30] | Non-inferiority not shown | 0.417   |
| [CoP] Furlong HAC Stem CSF                                 | 693            | 1.24                   | 0.69                      | [-0.14 , 1.52] | Non-inferiority not shown | 0.103   |
| [CoP] MS-30 Original ME Muller Low Profile Cup             | 300            | 0.00                   | --                        | [ -- , -- ]    | No failures to date       |         |
| [MoP] Accolade Trident                                     | 1,623          | 1.59                   | 1.04                      | [ 0.40 , 1.69] | Inferior by $\geq 20\%$   | 0.002   |
| [MoP] C-Stem AMT Cemented Stem Charnley and Elite Plus LPW | 646            | 1.09                   | 0.54                      | [-0.24 , 1.32] | Non-inferiority not shown | 0.176   |
| [MoP] C-Stem AMT Cemented Stem Elite Plus Ogee             | 646            | 0.88                   | 0.33                      | [-0.37 , 1.03] | Non-inferiority not shown | 0.354   |
| [MoP] C-Stem AMT Cemented Stem Marathon                    | 343            | 0.68                   | 0.13                      | [-0.52 , 0.78] | Non-inferiority not shown | 0.691   |
| [MoP] C-Stem AMT Cemented Stem Pinnacle                    | 369            | 1.48                   | 0.93                      | [ 0.12 , 1.74] | Inferior by $\geq 20\%$   | 0.024   |
| [MoP] C-Stem Cemented Stem Charnley and Elite Plus LPW     | 384            | 1.43                   | 0.88                      | [-0.30 , 2.06] | Non-inferiority not shown | 0.145   |
| [MoP] C-Stem Cemented Stem Elite Plus Ogee                 | 808            | 0.43                   | -0.12                     | [-0.65 , 0.42] | Non-inferiority not shown | 0.672   |
| [MoP] C-Stem Cemented Stem Marathon                        | 333            | 0.58                   | 0.03                      | [-0.63 , 0.69] | Non-inferiority not shown | 0.928   |
| [MoP] C-Stem Cemented Stem Opera                           | 270            | 0.34                   | -0.21                     | [-0.95 , 0.52] | Non-inferiority not shown | 0.568   |
| [MoP] CCA Cemented Stem CCB Cup                            | 329            | 1.00                   | 0.45                      | [-0.59 , 1.49] | Non-inferiority not shown | 0.394   |
| [MoP] CPCS Opera                                           | 309            | 0.61                   | 0.06                      | [-0.84 , 0.95] | Non-inferiority not shown | 0.904   |
| [MoP] CPT Elite Plus Ogee                                  | 585            | 1.11                   | 0.56                      | [-0.27 , 1.40] | Non-inferiority not shown | 0.186   |
| [MoP] CPT Original ME Muller Low Profile Cup               | 272            | 1.78                   | 1.23                      | [-0.25 , 2.70] | Non-inferiority not shown | 0.104   |
| [MoP] CPT Trabecular Metal Modular Cementless Cup          | 306            | 0.92                   | 0.37                      | [-0.60 , 1.34] | Non-inferiority not shown | 0.451   |
| [MoP] CPT Trilogy                                          | 2,024          | 1.12                   | 0.57                      | [ 0.07 , 1.08] | Non-inferiority not shown | 0.027   |
| [MoP] CPT ZCA                                              | 3,039          | 1.37                   | 0.82                      | [ 0.34 , 1.30] | Inferior by $\geq 20\%$   | 0.001   |
| [MoP] Charnley Cemented Stem Charnley Cemented Cup         | 926            | 0.92                   | 0.37                      | [-0.31 , 1.05] | Non-inferiority not shown | 0.289   |
| [MoP] Charnley Cemented Stem Charnley Ogee                 | 2,041          | 0.79                   | 0.24                      | [-0.25 , 0.72] | Non-inferiority not shown | 0.344   |
| [MoP] Charnley Cemented Stem Opera                         | 306            | 0.93                   | 0.38                      | [-0.72 , 1.49] | Non-inferiority not shown | 0.494   |
| [MoP] Charnley Cemented Stem Wroblewski Golf Ball          | 275            | 1.66                   | 1.11                      | [-0.37 , 2.59] | Non-inferiority not shown | 0.142   |
| [MoP] Corail Duraloc Cementless Cup                        | 535            | 0.68                   | 0.13                      | [-0.61 , 0.87] | Non-inferiority not shown | 0.727   |
| [MoP] Corail Elite Plus Cemented Cup                       | 272            | 0.65                   | 0.10                      | [-0.86 , 1.06] | Non-inferiority not shown | 0.841   |
| [MoP] Corail Elite Plus Ogee                               | 376            | 1.19                   | 0.64                      | [-0.36 , 1.64] | Non-inferiority not shown | 0.211   |
| [MoP] Corail Marathon                                      | 690            | 0.92                   | 0.37                      | [-0.28 , 1.01] | Non-inferiority not shown | 0.264   |
| [MoP] Corail Pinnacle                                      | 4,912          | 1.43                   | 0.88                      | [ 0.46 , 1.30] | Inferior by $\geq 20\%$   | <0.001  |
| [MoP] Corail Trilogy                                       | 336            | 0.77                   | 0.22                      | [-0.71 , 1.15] | Non-inferiority not shown | 0.642   |
| [MoP] Exeter V40 Cenator Cemented Cup                      | 694            | 0.99                   | 0.44                      | [-0.32 , 1.20] | Non-inferiority not shown | 0.256   |
| [MoP] Exeter V40 Charnley Ogee                             | 321            | 0.59                   | 0.04                      | [-0.84 , 0.92] | Non-inferiority not shown | 0.930   |
| [MoP] Exeter V40 Charnley and Elite Plus LPW               | 847            | 1.31                   | 0.76                      | [-0.02 , 1.54] | Non-inferiority not shown | 0.057   |
| [MoP] Exeter V40 Elite Plus Cemented Cup                   | 906            | 0.42                   | -0.14                     | [-0.62 , 0.35] | Non-inferiority not shown | 0.587   |
| [MoP] Exeter V40 Elite Plus Ogee                           | 5,144          | 0.61                   | 0.06                      | [-0.32 , 0.43] | Non-inferiority not shown | 0.772   |

|    |                                                               |        |      |       |                |                           |        |
|----|---------------------------------------------------------------|--------|------|-------|----------------|---------------------------|--------|
| 1  | [MoP] Exeter V40 Exeter Contemporary Flanged                  | 12,084 | 0.59 | 0.04  | [-0.31 , 0.39] | Non-inferiority not shown | 0.821  |
| 2  | [MoP] Exeter V40 Exeter Contemporary Hooded                   | 5,022  | 1.11 | 0.56  | [ 0.15 , 0.97] | Inferior by $\geq 20\%$   | 0.007  |
| 3  | [MoP] Exeter V40 Exeter Duration                              | 3,745  | 0.79 | 0.24  | [-0.18 , 0.65] | Non-inferiority not shown | 0.265  |
| 4  | [MoP] Exeter V40 Exeter X3 Rimfit                             | 1,286  | 0.68 | 0.13  | [-0.31 , 0.57] | Non-inferiority not shown | 0.567  |
| 5  | [MoP] Exeter V40 Marathon                                     | 365    | 0.95 | 0.40  | [-0.38 , 1.18] | Non-inferiority not shown | 0.319  |
| 6  | [MoP] Exeter V40 Opera                                        | 732    | 0.48 | -0.07 | [-0.64 , 0.50] | Non-inferiority not shown | 0.815  |
| 7  | [MoP] Exeter V40 Pinnacle                                     | 736    | 0.83 | 0.28  | [-0.31 , 0.87] | Non-inferiority not shown | 0.358  |
| 8  | [MoP] Exeter V40 Reflection Cementless                        | 494    | 0.75 | 0.20  | [-0.60 , 1.00] | Non-inferiority not shown | 0.623  |
| 9  | [MoP] Exeter V40 Trident                                      | 4,508  | 0.77 | 0.22  | [-0.16 , 0.60] | Non-inferiority not shown | 0.261  |
| 10 | [MoP] Exeter V40 Trilogy                                      | 1,511  | 0.87 | 0.32  | [-0.21 , 0.86] | Non-inferiority not shown | 0.240  |
| 11 | [MoP] Exeter V40 Ultima Cemented Cup                          | 337    | 0.82 | 0.27  | [-0.71 , 1.25] | Non-inferiority not shown | 0.591  |
| 12 | [MoP] Furlong Cemented Stem JRI Cemented Cup                  | 531    | 0.88 | 0.33  | [-0.51 , 1.16] | Non-inferiority not shown | 0.442  |
| 13 | [MoP] Furlong HAC Stem CSF                                    | 1,553  | 2.48 | 1.93  | [ 1.15 , 2.70] | Inferior by $\geq 100\%$  | <0.001 |
| 14 | [MoP] Furlong HAC Stem Furlong HAC CSF Plus                   | 792    | 2.58 | 2.03  | [ 1.08 , 2.97] | Inferior by $\geq 100\%$  | <0.001 |
| 15 | [MoP] MS-30 Original ME Muller Low Profile Cup                | 401    | 0.36 | -0.20 | [-0.78 , 0.39] | Non-inferiority not shown | 0.516  |
| 16 | [MoP] Muller Straight Stem Original ME Muller Low Profile Cup | 461    | 0.78 | 0.23  | [-0.53 , 0.99] | Non-inferiority not shown | 0.550  |
| 17 | [MoP] Muller-Biomet Apollo                                    | 551    | 0.66 | 0.11  | [-0.61 , 0.83] | Non-inferiority not shown | 0.763  |
| 18 | [MoP] Muller-Biomet Original ME Muller Low Profile Cup        | 342    | 1.08 | 0.53  | [-0.57 , 1.63] | Non-inferiority not shown | 0.346  |
| 19 | [MoP] Omnifit Cemented Stem ODC                               | 253    | 1.47 | 0.92  | [-0.55 , 2.39] | Non-inferiority not shown | 0.218  |
| 20 | [MoP] SL-Plus Cementless Stem EP-Fit Plus                     | 290    | 0.71 | 0.16  | [-0.70 , 1.02] | Non-inferiority not shown | 0.720  |
| 21 | [MoP] Stanmore Modular Stem SHP Cup                           | 367    | 0.64 | 0.09  | [-0.70 , 0.89] | Non-inferiority not shown | 0.819  |
| 22 | [MoP] Stanmore Modular Stem Stanmore-Arcom Cup                | 1,325  | 0.86 | 0.31  | [-0.26 , 0.87] | Non-inferiority not shown | 0.289  |
| 23 | [MoP] Taperloc Cementless Stem Exceed ABT                     | 733    | 1.73 | 1.18  | [ 0.37 , 1.99] | Inferior by $\geq 20\%$   | 0.004  |

For peer review only

**Supplemental table 5b: Difference in Kaplan-Meier failure estimate between a contemporary reference and implants with at least 250 at risk at 5 years since primary in females >75 years**

| Stem/cup brand                                                | Number at risk | Cumulative failure (%) | Difference in failure (%) | 95% CI         | Equivalence status        | p-value |
|---------------------------------------------------------------|----------------|------------------------|---------------------------|----------------|---------------------------|---------|
| [MoP] Charnley Cemented Stem Charnley and Elite Plus LPW      | 1,515          | 0.73                   | [REFERENCE]               |                |                           |         |
| [CoC] Corail Pinnacle                                         | 454            | 2.22                   | 1.49                      | [ 0.47 , 2.50] | Inferior by $\geq 20\%$   | 0.004   |
| [CoC] Furlong HAC Stem Furlong HAC CSF Plus                   | 302            | 1.22                   | 0.49                      | [-0.55 , 1.53] | Non-inferiority not shown | 0.352   |
| [CoP] Furlong HAC Stem CSF                                    | 539            | 1.56                   | 0.83                      | [-0.13 , 1.80] | Non-inferiority not shown | 0.089   |
| [MoP] Accolade Trident                                        | 1,066          | 2.01                   | 1.28                      | [ 0.53 , 2.03] | Inferior by $\geq 20\%$   | 0.001   |
| [MoP] C-Stem AMT Cemented Stem Charnley and Elite Plus LPW    | 388            | 1.25                   | 0.52                      | [-0.34 , 1.39] | Non-inferiority not shown | 0.236   |
| [MoP] C-Stem AMT Cemented Stem Elite Plus Ogee                | 345            | 0.88                   | 0.15                      | [-0.57 , 0.88] | Non-inferiority not shown | 0.682   |
| [MoP] C-Stem Cemented Stem Charnley and Elite Plus LPW        | 328            | 1.73                   | 1.00                      | [-0.33 , 2.33] | Non-inferiority not shown | 0.141   |
| [MoP] C-Stem Cemented Stem Elite Plus Ogee                    | 614            | 0.57                   | -0.16                     | [-0.79 , 0.47] | Non-inferiority not shown | 0.615   |
| [MoP] CPT Elite Plus Ogee                                     | 388            | 1.49                   | 0.76                      | [-0.24 , 1.77] | Non-inferiority not shown | 0.136   |
| [MoP] CPT Trilogy                                             | 1,273          | 1.88                   | 1.15                      | [ 0.47 , 1.83] | Inferior by $\geq 20\%$   | 0.001   |
| [MoP] CPT ZCA                                                 | 2,186          | 1.86                   | 1.13                      | [ 0.55 , 1.71] | Inferior by $\geq 20\%$   | <0.001  |
| [MoP] Charnley Cemented Stem Charnley Cemented Cup            | 780            | 1.27                   | 0.54                      | [-0.27 , 1.36] | Non-inferiority not shown | 0.190   |
| [MoP] Charnley Cemented Stem Charnley Ogee                    | 1,658          | 1.15                   | 0.42                      | [-0.17 , 1.01] | Non-inferiority not shown | 0.162   |
| [MoP] Corail Duraloc Cementless Cup                           | 479            | 1.66                   | 0.93                      | [-0.21 , 2.07] | Non-inferiority not shown | 0.111   |
| [MoP] Corail Marathon                                         | 325            | 0.92                   | 0.19                      | [-0.49 , 0.86] | Non-inferiority not shown | 0.585   |
| [MoP] Corail Pinnacle                                         | 2,638          | 1.78                   | 1.05                      | [ 0.55 , 1.55] | Inferior by $\geq 20\%$   | <0.001  |
| [MoP] Corail Trilogy                                          | 261            | 1.11                   | 0.39                      | [-0.78 , 1.55] | Non-inferiority not shown | 0.515   |
| [MoP] Exeter V40 Cenator Cemented Cup                         | 533            | 1.32                   | 0.59                      | [-0.31 , 1.49] | Non-inferiority not shown | 0.201   |
| [MoP] Exeter V40 Charnley Ogee                                | 264            | 1.27                   | 0.54                      | [-0.76 , 1.85] | Non-inferiority not shown | 0.414   |
| [MoP] Exeter V40 Charnley and Elite Plus LPW                  | 575            | 1.31                   | 0.58                      | [-0.23 , 1.39] | Non-inferiority not shown | 0.159   |
| [MoP] Exeter V40 Elite Plus Cemented Cup                      | 653            | 0.53                   | -0.20                     | [-0.77 , 0.38] | Non-inferiority not shown | 0.502   |
| [MoP] Exeter V40 Elite Plus Ogee                              | 3,667          | 0.84                   | 0.11                      | [-0.34 , 0.56] | Non-inferiority not shown | 0.644   |
| [MoP] Exeter V40 Exeter Contemporary Flanged                  | 7,444          | 0.86                   | 0.13                      | [-0.28 , 0.55] | Non-inferiority not shown | 0.524   |
| [MoP] Exeter V40 Exeter Contemporary Hooded                   | 3,318          | 1.47                   | 0.74                      | [ 0.24 , 1.23] | Inferior by $\geq 20\%$   | 0.003   |
| [MoP] Exeter V40 Exeter Duration                              | 2,928          | 1.18                   | 0.46                      | [-0.05 , 0.96] | Non-inferiority not shown | 0.078   |
| [MoP] Exeter V40 Opera                                        | 530            | 0.63                   | -0.10                     | [-0.77 , 0.57] | Non-inferiority not shown | 0.768   |
| [MoP] Exeter V40 Pinnacle                                     | 386            | 1.03                   | 0.30                      | [-0.44 , 1.04] | Non-inferiority not shown | 0.422   |
| [MoP] Exeter V40 Reflection Cementless                        | 402            | 0.96                   | 0.23                      | [-0.69 , 1.16] | Non-inferiority not shown | 0.620   |
| [MoP] Exeter V40 Trident                                      | 2,517          | 1.05                   | 0.32                      | [-0.15 , 0.79] | Non-inferiority not shown | 0.179   |
| [MoP] Exeter V40 Trilogy                                      | 1,080          | 1.32                   | 0.59                      | [-0.08 , 1.27] | Non-inferiority not shown | 0.085   |
| [MoP] Exeter V40 Ultima Cemented Cup                          | 300            | 1.15                   | 0.42                      | [-0.77 , 1.61] | Non-inferiority not shown | 0.488   |
| [MoP] Furlong Cemented Stem JRI Cemented Cup                  | 426            | 0.88                   | 0.15                      | [-0.71 , 1.00] | Non-inferiority not shown | 0.734   |
| [MoP] Furlong HAC Stem CSF                                    | 1,201          | 3.07                   | 2.34                      | [ 1.44 , 3.24] | Inferior by $\geq 100\%$  | <0.001  |
| [MoP] Furlong HAC Stem Furlong HAC CSF Plus                   | 481            | 2.71                   | 1.98                      | [ 0.98 , 2.98] | Inferior by $\geq 100\%$  | <0.001  |
| [MoP] MS-30 Original ME Muller Low Profile Cup                | 259            | 1.30                   | 0.57                      | [-0.67 , 1.81] | Non-inferiority not shown | 0.366   |
| [MoP] Muller Straight Stem Original ME Muller Low Profile Cup | 319            | 1.04                   | 0.31                      | [-0.62 , 1.25] | Non-inferiority not shown | 0.514   |
| [MoP] Muller-Biomet Apollo                                    | 422            | 0.86                   | 0.13                      | [-0.71 , 0.98] | Non-inferiority not shown | 0.759   |
| [MoP] Stanmore Modular Stem Stanmore-Arcom Cup                | 979            | 1.12                   | 0.39                      | [-0.28 , 1.06] | Non-inferiority not shown | 0.253   |

---

[MoP] Taperloc Cementless Stem Exceed ABT 337 1.95 1.22 [ 0.29 , 2.15] Inferior by  $\geq 20\%$  0.010

1  
2  
3  
4  
5  
6  
7  
8  
9  
10  
11  
12  
13  
14  
15  
16  
17  
18  
19  
20  
21  
22  
23  
24  
25  
26  
27  
28  
29  
30  
31  
32  
33  
34  
35  
36  
37  
38  
39  
40  
41  
42  
43  
44  
45  
46

For peer review only

**Supplemental table 5c: Difference in Kaplan-Meier failure estimate between a contemporary reference and implants with at least 250 at risk at 7 years since primary in females >75 years**

| Stem/cup brand                                           | Number at risk | Cumulative failure (%) | Difference in failure (%) | 95% CI         | Equivalence status        | p-value |
|----------------------------------------------------------|----------------|------------------------|---------------------------|----------------|---------------------------|---------|
| [MoP] Charnley Cemented Stem Charnley and Elite Plus LPW | 1,119          | 0.88                   | [REFERENCE]               |                |                           |         |
| [CoP] Furlong HAC Stem CSF                               | 391            | 2.04                   | 1.16                      | [-0.02 , 2.34] | Non-inferiority not shown | 0.055   |
| [MoP] Accolade Trident                                   | 460            | 2.40                   | 1.52                      | [ 0.61 , 2.42] | Inferior by $\geq 20\%$   | 0.001   |
| [MoP] C-Stem Cemented Stem Charnley and Elite Plus LPW   | 292            | 1.73                   | 0.85                      | [-0.50 , 2.19] | Non-inferiority not shown | 0.218   |
| [MoP] C-Stem Cemented Stem Elite Plus Ogee               | 444            | 0.57                   | -0.31                     | [-0.98 , 0.35] | Non-inferiority not shown | 0.354   |
| [MoP] CPT Trilogy                                        | 689            | 2.22                   | 1.34                      | [ 0.53 , 2.16] | Inferior by $\geq 20\%$   | 0.001   |
| [MoP] CPT ZCA                                            | 1,341          | 2.44                   | 1.56                      | [ 0.85 , 2.27] | Inferior by $\geq 20\%$   | <0.001  |
| [MoP] Charnley Cemented Stem Charnley Cemented Cup       | 605            | 1.72                   | 0.84                      | [-0.14 , 1.81] | Non-inferiority not shown | 0.093   |
| [MoP] Charnley Cemented Stem Charnley Ogee               | 1,236          | 1.35                   | 0.47                      | [-0.20 , 1.13] | Non-inferiority not shown | 0.167   |
| [MoP] Corail Duraloc Cementless Cup                      | 363            | 2.36                   | 1.48                      | [ 0.08 , 2.88] | Non-inferiority not shown | 0.039   |
| [MoP] Corail Pinnacle                                    | 1,150          | 2.17                   | 1.28                      | [ 0.67 , 1.90] | Inferior by $\geq 20\%$   | <0.001  |
| [MoP] Exeter V40 Cenator Cemented Cup                    | 373            | 1.32                   | 0.44                      | [-0.49 , 1.37] | Non-inferiority not shown | 0.355   |
| [MoP] Exeter V40 Charnley and Elite Plus LPW             | 309            | 1.31                   | 0.43                      | [-0.41 , 1.26] | Non-inferiority not shown | 0.313   |
| [MoP] Exeter V40 Elite Plus Cemented Cup                 | 429            | 0.95                   | 0.07                      | [-0.77 , 0.90] | Non-inferiority not shown | 0.879   |
| [MoP] Exeter V40 Elite Plus Ogee                         | 2,329          | 1.18                   | 0.30                      | [-0.24 , 0.83] | Non-inferiority not shown | 0.283   |
| [MoP] Exeter V40 Exeter Contemporary Flanged             | 4,187          | 1.13                   | 0.24                      | [-0.24 , 0.73] | Non-inferiority not shown | 0.320   |
| [MoP] Exeter V40 Exeter Contemporary Hooded              | 1,866          | 2.16                   | 1.28                      | [ 0.66 , 1.90] | Inferior by $\geq 20\%$   | <0.001  |
| [MoP] Exeter V40 Exeter Duration                         | 1,961          | 1.66                   | 0.78                      | [ 0.17 , 1.39] | Non-inferiority not shown | 0.012   |
| [MoP] Exeter V40 Opera                                   | 317            | 0.85                   | -0.03                     | [-0.86 , 0.80] | Non-inferiority not shown | 0.950   |
| [MoP] Exeter V40 Reflection Cementless                   | 258            | 1.34                   | 0.46                      | [-0.74 , 1.66] | Non-inferiority not shown | 0.452   |
| [MoP] Exeter V40 Trident                                 | 1,221          | 1.27                   | 0.39                      | [-0.17 , 0.95] | Non-inferiority not shown | 0.168   |
| [MoP] Exeter V40 Trilogy                                 | 618            | 1.41                   | 0.53                      | [-0.20 , 1.26] | Non-inferiority not shown | 0.151   |
| [MoP] Furlong Cemented Stem JRI Cemented Cup             | 307            | 1.11                   | 0.23                      | [-0.76 , 1.22] | Non-inferiority not shown | 0.649   |
| [MoP] Furlong HAC Stem CSF                               | 882            | 3.51                   | 2.63                      | [ 1.63 , 3.63] | Inferior by $\geq 100\%$  | <0.001  |
| [MoP] Muller-Biomet Apollo                               | 288            | 0.86                   | -0.02                     | [-0.89 , 0.85] | Non-inferiority not shown | 0.965   |
| [MoP] Stanmore Modular Stem Stanmore-Arcom Cup           | 575            | 1.36                   | 0.48                      | [-0.29 , 1.26] | Non-inferiority not shown | 0.223   |



**Supplemental table 6a: Difference in Kaplan-Meier failure estimate between a contemporary reference and implants with at least 250 at risk at 3 years since primary in males**

| Stem/cup brand                                                | Number at risk | Cumulative failure (%) | Difference in failure (%) | 95% CI         | Equivalence status        | p-value |
|---------------------------------------------------------------|----------------|------------------------|---------------------------|----------------|---------------------------|---------|
| [CoP] Exeter V40 Exeter Contemporary Flanged                  | 1,147          | 0.76                   | [REFERENCE]               |                |                           |         |
| [CoC] ABG II Monolithic Cementless Stem ABG II Cementless Cup | 560            | 2.22                   | 1.46                      | [ 0.19 , 2.73] | Inferior by $\geq 20\%$   | 0.024   |
| [CoC] ABG II Monolithic Cementless Stem Trident               | 544            | 1.76                   | 1.00                      | [-0.16 , 2.17] | Non-inferiority not shown | 0.091   |
| [CoC] Accolade Trident                                        | 3,001          | 2.33                   | 1.57                      | [ 0.90 , 2.25] | Inferior by $\geq 100\%$  | <0.001  |
| [CoC] Bimetric Cementless Stem Exceed ABT                     | 377            | 0.89                   | 0.14                      | [-0.84 , 1.11] | Non-inferiority not shown | 0.784   |
| [CoC] C-Stem AMT Cemented Stem Pinnacle                       | 284            | 0.43                   | -0.33                     | [-1.06 , 0.40] | Non-inferiority not shown | 0.380   |
| [CoC] CPT Continuum                                           | 321            | 2.54                   | 1.78                      | [ 0.30 , 3.27] | Inferior by $\geq 20\%$   | 0.019   |
| [CoC] Corail Delta TT                                         | 274            | 2.45                   | 1.69                      | [ 0.11 , 3.27] | Non-inferiority not shown | 0.036   |
| [CoC] Corail DeltaMotion                                      | 452            | 1.67                   | 0.91                      | [-0.25 , 2.08] | Non-inferiority not shown | 0.125   |
| [CoC] Corail Duraloc Option                                   | 463            | 2.29                   | 1.53                      | [ 0.13 , 2.94] | Non-inferiority not shown | 0.033   |
| [CoC] Corail Pinnacle                                         | 12,616         | 1.92                   | 1.16                      | [ 0.68 , 1.64] | Inferior by $\geq 20\%$   | <0.001  |
| [CoC] Excia Cementless Plasmacap SC                           | 419            | 0.85                   | 0.09                      | [-0.77 , 0.95] | Non-inferiority not shown | 0.832   |
| [CoC] Exeter V40 ABG II Cementless Cup                        | 457            | 1.13                   | 0.38                      | [-0.62 , 1.38] | Non-inferiority not shown | 0.460   |
| [CoC] Exeter V40 Trident                                      | 4,326          | 1.13                   | 0.37                      | [-0.15 , 0.89] | Non-inferiority not shown | 0.158   |
| [CoC] Furlong Evolution Cementless Furlong HAC CSF Plus       | 275            | 2.00                   | 1.24                      | [ 0.12 , 2.36] | Non-inferiority not shown | 0.030   |
| [CoC] Furlong HAC Stem CSF                                    | 688            | 2.76                   | 2.00                      | [ 0.73 , 3.27] | Inferior by $\geq 20\%$   | 0.002   |
| [CoC] Furlong HAC Stem Furlong HAC CSF Plus                   | 4,023          | 1.72                   | 0.96                      | [ 0.41 , 1.51] | Inferior by $\geq 20\%$   | 0.001   |
| [CoC] M/L Taper Cementless Continuum                          | 704            | 1.73                   | 0.97                      | [ 0.05 , 1.90] | Non-inferiority not shown | 0.040   |
| [CoC] Metafix Stem Trinity                                    | 344            | 1.09                   | 0.33                      | [-0.59 , 1.26] | Non-inferiority not shown | 0.479   |
| [CoC] Polarstem Cementless R3 Cementless                      | 341            | 0.37                   | -0.39                     | [-1.06 , 0.27] | Non-inferiority not shown | 0.248   |
| [CoC] SL-Plus Cementless Stem EP-Fit Plus                     | 601            | 5.11                   | 4.36                      | [ 2.60 , 6.11] | Inferior by $\geq 100\%$  | <0.001  |
| [CoC] SL-Plus Cementless Stem R3 Cementless                   | 298            | 1.48                   | 0.72                      | [-0.64 , 2.08] | Non-inferiority not shown | 0.298   |
| [CoC] SPS Modular April - Ceramic                             | 291            | 0.59                   | -0.17                     | [-1.09 , 0.75] | Non-inferiority not shown | 0.722   |
| [CoC] Taperloc Cementless Stem Exceed ABT                     | 2,976          | 1.64                   | 0.88                      | [ 0.30 , 1.46] | Inferior by $\geq 20\%$   | 0.003   |
| [CoC] miniHip Trinity                                         | 273            | 3.21                   | 2.46                      | [ 0.68 , 4.24] | Inferior by $\geq 20\%$   | 0.007   |
| [CoP] Accolade Trident                                        | 1,319          | 1.66                   | 0.91                      | [ 0.21 , 1.60] | Inferior by $\geq 20\%$   | 0.011   |
| [CoP] C-Stem Cemented Stem Elite Plus Ogee                    | 265            | 0.93                   | 0.17                      | [-0.96 , 1.30] | Non-inferiority not shown | 0.771   |
| [CoP] C-Stem Cemented Stem Marathon                           | 526            | 1.07                   | 0.31                      | [-0.49 , 1.11] | Non-inferiority not shown | 0.447   |
| [CoP] C-Stem Cemented Stem Opera                              | 341            | 1.15                   | 0.39                      | [-0.81 , 1.60] | Non-inferiority not shown | 0.520   |
| [CoP] C-Stem Cemented Stem Wroblewski Golf Ball               | 396            | 0.90                   | 0.14                      | [-0.84 , 1.12] | Non-inferiority not shown | 0.779   |
| [CoP] CPT Trilogy                                             | 450            | 1.91                   | 1.15                      | [ 0.24 , 2.05] | Inferior by $\geq 20\%$   | 0.013   |
| [CoP] Corail Charnley and Elite Plus LPW                      | 252            | 1.10                   | 0.35                      | [-0.97 , 1.66] | Non-inferiority not shown | 0.606   |
| [CoP] Corail Marathon                                         | 525            | 1.69                   | 0.93                      | [-0.02 , 1.89] | Non-inferiority not shown | 0.055   |
| [CoP] Corail Pinnacle                                         | 3,493          | 1.14                   | 0.38                      | [-0.11 , 0.88] | Non-inferiority not shown | 0.131   |
| [CoP] Exeter V40 Charnley and Elite Plus LPW                  | 300            | 1.07                   | 0.31                      | [-0.82 , 1.44] | Non-inferiority not shown | 0.593   |
| [CoP] Exeter V40 Elite Plus Ogee                              | 536            | 0.86                   | 0.10                      | [-0.71 , 0.92] | Non-inferiority not shown | 0.803   |
| [CoP] Exeter V40 Exeter Contemporary Hooded                   | 298            | 2.35                   | 1.59                      | [-0.00 , 3.18] | Non-inferiority not shown | 0.050   |
| [CoP] Exeter V40 Exeter Duration                              | 300            | 0.27                   | -0.49                     | [-1.17 , 0.18] | Non-inferiority not shown | 0.152   |
| [CoP] Exeter V40 Exeter X3 Rimfit                             | 911            | 1.32                   | 0.56                      | [-0.15 , 1.27] | Non-inferiority not shown | 0.120   |
| [CoP] Exeter V40 Pinnacle                                     | 251            | 1.17                   | 0.41                      | [-0.58 , 1.40] | Non-inferiority not shown | 0.418   |

|    |                                                            |        |      |       |                |                           |        |
|----|------------------------------------------------------------|--------|------|-------|----------------|---------------------------|--------|
| 1  | [CoP] Exeter V40 Trident                                   | 1,917  | 0.79 | 0.04  | [-0.47 , 0.55] | Non-inferiority not shown | 0.887  |
| 2  | [CoP] Exeter V40 Trilogy                                   | 764    | 1.73 | 0.97  | [ 0.00 , 1.94] | Non-inferiority not shown | 0.050  |
| 3  | [CoP] Furlong HAC Stem CSF                                 | 2,536  | 1.18 | 0.42  | [-0.17 , 1.01] | Non-inferiority not shown | 0.162  |
| 4  | [CoP] Furlong HAC Stem Furlong HAC CSF Plus                | 699    | 1.22 | 0.46  | [-0.33 , 1.26] | Non-inferiority not shown | 0.250  |
| 5  | [CoP] MS-30 Original ME Muller Low Profile Cup             | 459    | 0.35 | -0.41 | [-1.06 , 0.24] | Non-inferiority not shown | 0.217  |
| 6  | [CoP] SL-Plus Cementless Stem Bicon-Plus                   | 279    | 3.64 | 2.88  | [ 0.73 , 5.04] | Inferior by $\geq 20\%$   | 0.009  |
| 7  | [CoP] SL-Plus Cementless Stem EP-Fit Plus                  | 366    | 1.82 | 1.06  | [-0.34 , 2.47] | Non-inferiority not shown | 0.138  |
| 8  | [CoP] Taperloc Cementless Stem Exceed ABT                  | 821    | 1.17 | 0.41  | [-0.27 , 1.09] | Non-inferiority not shown | 0.240  |
| 9  | [MoP] Accolade Trident                                     | 3,597  | 2.40 | 1.65  | [ 1.02 , 2.27] | Inferior by $\geq 100\%$  | <0.001 |
| 10 | [MoP] Anthology R3 Cementless                              | 427    | 2.22 | 1.46  | [ 0.36 , 2.56] | Inferior by $\geq 20\%$   | 0.009  |
| 11 | [MoP] C-Stem AMT Cemented Stem Charnley and Elite Plus LPW | 717    | 1.65 | 0.89  | [-0.07 , 1.85] | Non-inferiority not shown | 0.070  |
| 12 | [MoP] C-Stem AMT Cemented Stem Elite Plus Ogee             | 473    | 0.61 | -0.15 | [-0.89 , 0.59] | Non-inferiority not shown | 0.690  |
| 13 | [MoP] C-Stem AMT Cemented Stem Marathon                    | 406    | 1.04 | 0.28  | [-0.47 , 1.03] | Non-inferiority not shown | 0.461  |
| 14 | [MoP] C-Stem AMT Cemented Stem Pinnacle                    | 495    | 1.18 | 0.42  | [-0.37 , 1.22] | Non-inferiority not shown | 0.296  |
| 15 | [MoP] C-Stem Cemented Stem Charnley Ogee                   | 251    | 0.91 | 0.15  | [-0.96 , 1.26] | Non-inferiority not shown | 0.794  |
| 16 | [MoP] C-Stem Cemented Stem Charnley and Elite Plus LPW     | 476    | 0.79 | 0.03  | [-0.85 , 0.92] | Non-inferiority not shown | 0.942  |
| 17 | [MoP] C-Stem Cemented Stem Elite Plus Cemented Cup         | 261    | 0.70 | -0.06 | [-1.12 , 1.00] | Non-inferiority not shown | 0.918  |
| 18 | [MoP] C-Stem Cemented Stem Elite Plus Ogee                 | 1,224  | 1.18 | 0.42  | [-0.29 , 1.12] | Non-inferiority not shown | 0.243  |
| 19 | [MoP] C-Stem Cemented Stem Marathon                        | 597    | 1.40 | 0.65  | [-0.25 , 1.54] | Non-inferiority not shown | 0.155  |
| 20 | [MoP] C-Stem Cemented Stem Opera                           | 528    | 1.62 | 0.86  | [-0.27 , 2.00] | Non-inferiority not shown | 0.137  |
| 21 | [MoP] C-Stem Cemented Stem Wroblewski Golf Ball            | 354    | 1.29 | 0.53  | [-0.67 , 1.73] | Non-inferiority not shown | 0.388  |
| 22 | [MoP] CCA Cemented Stem CCB Cup                            | 337    | 0.47 | -0.28 | [-1.07 , 0.50] | Non-inferiority not shown | 0.480  |
| 23 | [MoP] CLS Cementless Stem Allofit                          | 265    | 3.32 | 2.56  | [ 0.49 , 4.63] | Inferior by $\geq 20\%$   | 0.015  |
| 24 | [MoP] CPCS Opera                                           | 371    | 0.51 | -0.24 | [-1.07 , 0.59] | Non-inferiority not shown | 0.567  |
| 25 | [MoP] CPT Elite Plus Ogee                                  | 862    | 1.64 | 0.88  | [-0.02 , 1.79] | Non-inferiority not shown | 0.056  |
| 26 | [MoP] CPT Trilogy                                          | 2,750  | 1.70 | 0.95  | [ 0.35 , 1.54] | Inferior by $\geq 20\%$   | 0.002  |
| 27 | [MoP] CPT ZCA                                              | 2,153  | 1.52 | 0.76  | [ 0.15 , 1.37] | Non-inferiority not shown | 0.015  |
| 28 | [MoP] Charnley Cemented Stem Charnley Cemented Cup         | 1,527  | 1.34 | 0.58  | [-0.12 , 1.28] | Non-inferiority not shown | 0.107  |
| 29 | [MoP] Charnley Cemented Stem Charnley Ogee                 | 3,293  | 1.35 | 0.59  | [ 0.02 , 1.16] | Non-inferiority not shown | 0.043  |
| 30 | [MoP] Charnley Cemented Stem Charnley and Elite Plus LPW   | 1,647  | 0.97 | 0.22  | [-0.41 , 0.84] | Non-inferiority not shown | 0.496  |
| 31 | [MoP] Charnley Cemented Stem Opera                         | 407    | 1.15 | 0.39  | [-0.70 , 1.49] | Non-inferiority not shown | 0.479  |
| 32 | [MoP] Charnley Cemented Stem Wroblewski Golf Ball          | 382    | 1.45 | 0.69  | [-0.54 , 1.92] | Non-inferiority not shown | 0.270  |
| 33 | [MoP] Corail Duraloc Cementless Cup                        | 1,310  | 1.59 | 0.83  | [ 0.05 , 1.62] | Non-inferiority not shown | 0.038  |
| 34 | [MoP] Corail Elite Plus Cemented Cup                       | 337    | 1.52 | 0.76  | [-0.52 , 2.04] | Non-inferiority not shown | 0.245  |
| 35 | [MoP] Corail Elite Plus Ogee                               | 471    | 1.51 | 0.75  | [-0.32 , 1.82] | Non-inferiority not shown | 0.171  |
| 36 | [MoP] Corail Marathon                                      | 978    | 1.50 | 0.74  | [-0.00 , 1.48] | Non-inferiority not shown | 0.050  |
| 37 | [MoP] Corail Pinnacle                                      | 11,121 | 1.53 | 0.78  | [ 0.31 , 1.25] | Inferior by $\geq 20\%$   | 0.001  |
| 38 | [MoP] Corail Trilogy                                       | 726    | 1.48 | 0.72  | [-0.21 , 1.66] | Non-inferiority not shown | 0.131  |
| 39 | [MoP] Exeter V40 ABG II Cementless Cup                     | 258    | 2.15 | 1.39  | [-0.36 , 3.15] | Non-inferiority not shown | 0.120  |
| 40 | [MoP] Exeter V40 Cenator Cemented Cup                      | 705    | 1.30 | 0.55  | [-0.37 , 1.46] | Non-inferiority not shown | 0.240  |
| 41 | [MoP] Exeter V40 Charnley and Elite Plus LPW               | 667    | 1.09 | 0.33  | [-0.50 , 1.16] | Non-inferiority not shown | 0.437  |
| 42 | [MoP] Exeter V40 Duraloc Cementless Cup                    | 355    | 2.15 | 1.40  | [-0.14 , 2.93] | Non-inferiority not shown | 0.075  |
| 43 | [MoP] Exeter V40 Elite Plus Cemented Cup                   | 1,212  | 0.84 | 0.08  | [-0.56 , 0.72] | Non-inferiority not shown | 0.809  |
| 44 | [MoP] Exeter V40 Elite Plus Ogee                           | 5,579  | 0.96 | 0.21  | [-0.29 , 0.70] | Non-inferiority not shown | 0.413  |
| 45 | [MoP] Exeter V40 Exeter Contemporary Flanged               | 13,647 | 1.12 | 0.36  | [-0.09 , 0.82] | Non-inferiority not shown | 0.118  |
| 46 | [MoP] Exeter V40 Exeter Contemporary Hooded                | 5,115  | 1.83 | 1.07  | [ 0.53 , 1.60] | Inferior by $\geq 20\%$   | <0.001 |

|    |                                                               |       |      |       |                |                           |        |
|----|---------------------------------------------------------------|-------|------|-------|----------------|---------------------------|--------|
| 1  | [MoP] Exeter V40 Exeter Duration                              | 4,042 | 1.60 | 0.85  | [ 0.29 , 1.41] | Inferior by $\geq 20\%$   | 0.003  |
| 2  | [MoP] Exeter V40 Exeter X3 Rimfit                             | 1,854 | 1.41 | 0.65  | [ 0.06 , 1.24] | Non-inferiority not shown | 0.031  |
| 3  | [MoP] Exeter V40 Marathon                                     | 418   | 1.41 | 0.65  | [-0.32 , 1.61] | Non-inferiority not shown | 0.188  |
| 4  | [MoP] Exeter V40 Opera                                        | 714   | 1.04 | 0.28  | [-0.56 , 1.11] | Non-inferiority not shown | 0.514  |
| 5  | [MoP] Exeter V40 Pinnacle                                     | 784   | 1.67 | 0.91  | [ 0.08 , 1.75] | Non-inferiority not shown | 0.033  |
| 6  | [MoP] Exeter V40 Reflection Cementless                        | 729   | 1.79 | 1.04  | [ 0.01 , 2.06] | Non-inferiority not shown | 0.048  |
| 7  | [MoP] Exeter V40 Trident                                      | 6,504 | 1.31 | 0.55  | [ 0.07 , 1.04] | Non-inferiority not shown | 0.025  |
| 8  | [MoP] Exeter V40 Trilogy                                      | 3,337 | 1.06 | 0.31  | [-0.23 , 0.85] | Non-inferiority not shown | 0.265  |
| 9  | [MoP] Exeter V40 Ultima Cemented Cup                          | 363   | 2.49 | 1.73  | [ 0.15 , 3.32] | Non-inferiority not shown | 0.032  |
| 10 | [MoP] Furlong Cemented Stem JRI Cemented Cup                  | 443   | 1.25 | 0.50  | [-0.59 , 1.58] | Non-inferiority not shown | 0.370  |
| 11 | [MoP] Furlong HAC Stem CSF                                    | 2,566 | 1.90 | 1.14  | [ 0.49 , 1.79] | Inferior by $\geq 20\%$   | 0.001  |
| 12 | [MoP] Furlong HAC Stem Furlong HAC CSF Plus                   | 1,170 | 2.43 | 1.68  | [ 0.85 , 2.50] | Inferior by $\geq 100\%$  | <0.001 |
| 13 | [MoP] M/L Taper Cementless Allofit                            | 339   | 1.83 | 1.08  | [-0.26 , 2.41] | Non-inferiority not shown | 0.113  |
| 14 | [MoP] Muller Straight Stem Original ME Muller Low Profile Cup | 414   | 0.52 | -0.24 | [-0.97 , 0.49] | Non-inferiority not shown | 0.522  |
| 15 | [MoP] Muller-Biomet Apollo                                    | 748   | 1.13 | 0.37  | [-0.48 , 1.22] | Non-inferiority not shown | 0.395  |
| 16 | [MoP] Omnifit Cemented Stem ODC                               | 267   | 1.04 | 0.28  | [-0.96 , 1.52] | Non-inferiority not shown | 0.661  |
| 17 | [MoP] Polarstem Cementless R3 Cementless                      | 476   | 1.24 | 0.48  | [-0.21 , 1.18] | Non-inferiority not shown | 0.174  |
| 18 | [MoP] SL-Plus Cementless Stem EP-Fit Plus                     | 826   | 2.89 | 2.13  | [ 1.01 , 3.26] | Inferior by $\geq 100\%$  | <0.001 |
| 19 | [MoP] Stanmore Modular Stem SHP Cup                           | 267   | 0.99 | 0.23  | [-0.97 , 1.44] | Non-inferiority not shown | 0.702  |
| 20 | [MoP] Stanmore Modular Stem Stanmore-Arcom Cup                | 1,070 | 1.02 | 0.26  | [-0.44 , 0.97] | Non-inferiority not shown | 0.461  |
| 21 | [MoP] Synergy Cementless Stem R3 Cementless                   | 503   | 1.52 | 0.76  | [-0.10 , 1.63] | Non-inferiority not shown | 0.083  |
| 22 | [MoP] Synergy Cementless Stem Reflection Cementless           | 591   | 1.14 | 0.38  | [-0.56 , 1.32] | Non-inferiority not shown | 0.429  |
| 23 | [MoP] Taperloc Cementless Stem Exceed ABT                     | 1,447 | 1.40 | 0.64  | [ 0.00 , 1.28] | Non-inferiority not shown | 0.049  |
| 24 | [MoP] Versys Cementless Stem Trilogy                          | 369   | 4.30 | 3.54  | [ 1.49 , 5.58] | Inferior by $\geq 100\%$  | 0.001  |

**Supplemental table 6b: Difference in Kaplan-Meier failure estimate between a contemporary reference and implants with at least 250 at risk at 5 years since primary in males**

| Stem/cup brand                                                | Number at risk | Cumulative failure (%) | Difference in failure (%) | 95% CI         | Equivalence status        | p-value |
|---------------------------------------------------------------|----------------|------------------------|---------------------------|----------------|---------------------------|---------|
| [MoP] Exeter V40 Elite Plus Ogee                              | 4,143          | 1.29                   | [REFERENCE]               |                |                           |         |
| [CoC] ABG II Monolithic Cementless Stem ABG II Cementless Cup | 536            | 2.75                   | 1.47                      | [ 0.11 , 2.82] | Non-inferiority not shown | 0.035   |
| [CoC] ABG II Monolithic Cementless Stem Trident               | 463            | 3.15                   | 1.86                      | [ 0.36 , 3.37] | Inferior by $\geq 20\%$   | 0.015   |
| [CoC] Accolade Trident                                        | 2,264          | 3.15                   | 1.87                      | [ 1.19 , 2.54] | Inferior by $\geq 20\%$   | <0.001  |
| [CoC] Bimetric Cementless Stem Exceed ABT                     | 259            | 1.75                   | 0.46                      | [-0.86 , 1.79] | Non-inferiority not shown | 0.494   |
| [CoC] Corail DeltaMotion                                      | 261            | 1.91                   | 0.62                      | [-0.59 , 1.83] | Non-inferiority not shown | 0.315   |
| [CoC] Corail Duraloc Option                                   | 449            | 3.36                   | 2.07                      | [ 0.43 , 3.72] | Inferior by $\geq 20\%$   | 0.013   |
| [CoC] Corail Pinnacle                                         | 7,860          | 2.68                   | 1.40                      | [ 1.01 , 1.79] | Inferior by $\geq 20\%$   | <0.001  |
| [CoC] Exeter V40 ABG II Cementless Cup                        | 379            | 1.39                   | 0.10                      | [-0.97 , 1.17] | Non-inferiority not shown | 0.852   |
| [CoC] Exeter V40 Trident                                      | 3,289          | 1.81                   | 0.52                      | [ 0.04 , 1.00] | Non-inferiority not shown | 0.034   |
| [CoC] Furlong HAC Stem CSF                                    | 664            | 3.19                   | 1.91                      | [ 0.59 , 3.22] | Inferior by $\geq 20\%$   | 0.005   |
| [CoC] Furlong HAC Stem Furlong HAC CSF Plus                   | 2,393          | 1.91                   | 0.62                      | [ 0.15 , 1.10] | Non-inferiority not shown | 0.010   |
| [CoC] M/L Taper Cementless Continuum                          | 304            | 1.73                   | 0.44                      | [-0.42 , 1.31] | Non-inferiority not shown | 0.316   |
| [CoC] SL-Plus Cementless Stem EP-Fit Plus                     | 551            | 6.43                   | 5.14                      | [ 3.22 , 7.07] | Inferior by $\geq 100\%$  | <0.001  |

|    |                                                            |       |      |       |                 |                           |        |
|----|------------------------------------------------------------|-------|------|-------|-----------------|---------------------------|--------|
| 1  | [CoC] Taperloc Cementless Stem Exceed ABT                  | 1,657 | 1.87 | 0.59  | [ 0.07 , 1.11]  | Non-inferiority not shown | 0.027  |
| 2  | [CoP] Accolade Trident                                     | 544   | 2.06 | 0.77  | [ 0.05 , 1.50]  | Non-inferiority not shown | 0.037  |
| 3  | [CoP] C-Stem Cemented Stem Opera                           | 283   | 1.49 | 0.21  | [-1.13 , 1.54]  | Non-inferiority not shown | 0.759  |
| 4  | [CoP] C-Stem Cemented Stem Wroblewski Golf Ball            | 321   | 1.47 | 0.18  | [-1.03 , 1.39]  | Non-inferiority not shown | 0.769  |
| 5  | [CoP] Corail Pinnacle                                      | 1,695 | 1.78 | 0.49  | [ 0.01 , 0.98]  | Non-inferiority not shown | 0.047  |
| 6  | [CoP] Exeter V40 Elite Plus Ogee                           | 381   | 1.11 | -0.18 | [-1.06 , 0.71]  | Non-inferiority not shown | 0.697  |
| 7  | [CoP] Exeter V40 Exeter Contemporary Flanged               | 789   | 0.85 | -0.44 | [-0.98 , 0.11]  | Non-inferior              | 0.116  |
| 8  | [CoP] Exeter V40 Exeter Duration                           | 261   | 1.01 | -0.28 | [-1.46 , 0.90]  | Non-inferiority not shown | 0.641  |
| 9  | [CoP] Exeter V40 Trident                                   | 891   | 0.96 | -0.33 | [-0.79 , 0.13]  | Non-inferior              | 0.162  |
| 10 | [CoP] Exeter V40 Trilogy                                   | 631   | 2.00 | 0.72  | [-0.27 , 1.71]  | Non-inferiority not shown | 0.154  |
| 11 | [CoP] Furlong HAC Stem CSF                                 | 2,209 | 1.39 | 0.10  | [-0.42 , 0.62]  | Non-inferiority not shown | 0.703  |
| 12 | [CoP] Furlong HAC Stem Furlong HAC CSF Plus                | 400   | 1.38 | 0.10  | [-0.69 , 0.88]  | Non-inferiority not shown | 0.809  |
| 13 | [CoP] MS-30 Original ME Muller Low Profile Cup             | 330   | 0.35 | -0.94 | [-1.50 , -0.38] | Non-inferior              | 0.001  |
| 14 | [CoP] SL-Plus Cementless Stem Bicon-Plus                   | 253   | 4.74 | 3.46  | [ 1.01 , 5.90]  | Inferior by $\geq 20\%$   | 0.006  |
| 15 | [CoP] SL-Plus Cementless Stem EP-Fit Plus                  | 312   | 3.28 | 1.99  | [ 0.14 , 3.85]  | Non-inferiority not shown | 0.035  |
| 16 | [CoP] Taperloc Cementless Stem Exceed ABT                  | 309   | 1.70 | 0.42  | [-0.54 , 1.37]  | Non-inferiority not shown | 0.391  |
| 17 | [MoP] Accolade Trident                                     | 2,404 | 3.37 | 2.08  | [ 1.45 , 2.71]  | Inferior by $\geq 100\%$  | <0.001 |
| 18 | [MoP] C-Stem AMT Cemented Stem Charnley and Elite Plus LPW | 444   | 1.81 | 0.52  | [-0.44 , 1.47]  | Non-inferiority not shown | 0.286  |
| 19 | [MoP] C-Stem AMT Cemented Stem Elite Plus Ogee             | 253   | 0.61 | -0.68 | [-1.34 , -0.01] | Non-inferior              | 0.045  |
| 20 | [MoP] C-Stem Cemented Stem Charnley and Elite Plus LPW     | 429   | 1.01 | -0.27 | [-1.20 , 0.66]  | Non-inferiority not shown | 0.564  |
| 21 | [MoP] C-Stem Cemented Stem Elite Plus Ogee                 | 906   | 1.28 | 0.00  | [-0.66 , 0.66]  | Non-inferiority not shown | 0.997  |
| 22 | [MoP] C-Stem Cemented Stem Marathon                        | 274   | 1.82 | 0.54  | [-0.48 , 1.55]  | Non-inferiority not shown | 0.300  |
| 23 | [MoP] C-Stem Cemented Stem Opera                           | 389   | 2.23 | 0.94  | [-0.34 , 2.23]  | Non-inferiority not shown | 0.149  |
| 24 | [MoP] C-Stem Cemented Stem Wroblewski Golf Ball            | 269   | 1.29 | 0.00  | [-1.16 , 1.16]  | Non-inferiority not shown | 0.999  |
| 25 | [MoP] CPCS Opera                                           | 281   | 0.51 | -0.77 | [-1.54 , -0.01] | Non-inferior              | 0.048  |
| 26 | [MoP] CPT Elite Plus Ogee                                  | 630   | 2.35 | 1.07  | [ 0.02 , 2.11]  | Non-inferiority not shown | 0.046  |
| 27 | [MoP] CPT Trilogy                                          | 1,862 | 2.39 | 1.11  | [ 0.50 , 1.71]  | Inferior by $\geq 20\%$   | <0.001 |
| 28 | [MoP] CPT ZCA                                              | 1,549 | 2.42 | 1.13  | [ 0.46 , 1.80]  | Inferior by $\geq 20\%$   | 0.001  |
| 29 | [MoP] Charnley Cemented Stem Charnley Cemented Cup         | 1,338 | 2.22 | 0.93  | [ 0.15 , 1.71]  | Non-inferiority not shown | 0.019  |
| 30 | [MoP] Charnley Cemented Stem Charnley Ogee                 | 2,824 | 2.29 | 1.00  | [ 0.42 , 1.58]  | Inferior by $\geq 20\%$   | 0.001  |
| 31 | [MoP] Charnley Cemented Stem Charnley and Elite Plus LPW   | 1,414 | 1.42 | 0.14  | [-0.49 , 0.76]  | Non-inferiority not shown | 0.667  |
| 32 | [MoP] Charnley Cemented Stem Opera                         | 343   | 1.68 | 0.40  | [-0.88 , 1.67]  | Non-inferiority not shown | 0.540  |
| 33 | [MoP] Charnley Cemented Stem Wroblewski Golf Ball          | 311   | 1.75 | 0.47  | [-0.86 , 1.79]  | Non-inferiority not shown | 0.489  |
| 34 | [MoP] Corail Duraloc Cementless Cup                        | 1,204 | 2.54 | 1.25  | [ 0.36 , 2.14]  | Inferior by $\geq 20\%$   | 0.006  |
| 35 | [MoP] Corail Elite Plus Ogee                               | 352   | 1.79 | 0.50  | [-0.66 , 1.66]  | Non-inferiority not shown | 0.397  |
| 36 | [MoP] Corail Marathon                                      | 465   | 1.77 | 0.48  | [-0.28 , 1.24]  | Non-inferiority not shown | 0.216  |
| 37 | [MoP] Corail Pinnacle                                      | 6,318 | 1.91 | 0.63  | [ 0.26 , 0.99]  | Inferior by $\geq 20\%$   | 0.001  |
| 38 | [MoP] Corail Trilogy                                       | 526   | 2.48 | 1.20  | [ 0.01 , 2.38]  | Non-inferiority not shown | 0.047  |
| 39 | [MoP] Exeter V40 Cenator Cemented Cup                      | 573   | 1.74 | 0.45  | [-0.53 , 1.43]  | Non-inferiority not shown | 0.366  |
| 40 | [MoP] Exeter V40 Charnley and Elite Plus LPW               | 504   | 1.09 | -0.20 | [-0.97 , 0.57]  | Non-inferiority not shown | 0.612  |
| 41 | [MoP] Exeter V40 Duraloc Cementless Cup                    | 330   | 2.45 | 1.16  | [-0.44 , 2.77]  | Non-inferiority not shown | 0.156  |
| 42 | [MoP] Exeter V40 Elite Plus Cemented Cup                   | 906   | 1.20 | -0.09 | [-0.74 , 0.57]  | Non-inferiority not shown | 0.797  |
| 43 | [MoP] Exeter V40 Exeter Contemporary Flanged               | 8,757 | 1.54 | 0.26  | [-0.09 , 0.60]  | Non-inferiority not shown | 0.145  |
| 44 | [MoP] Exeter V40 Exeter Contemporary Hooded                | 3,570 | 2.27 | 0.98  | [ 0.51 , 1.45]  | Inferior by $\geq 20\%$   | <0.001 |
| 45 | [MoP] Exeter V40 Exeter Duration                           | 3,104 | 2.30 | 1.02  | [ 0.49 , 1.54]  | Inferior by $\geq 20\%$   | <0.001 |
| 46 | [MoP] Exeter V40 Exeter X3 Rimfit                          | 309   | 1.61 | 0.33  | [-0.31 , 0.96]  | Non-inferiority not shown | 0.314  |

|    |                                                               |       |      |       |                |                           |        |
|----|---------------------------------------------------------------|-------|------|-------|----------------|---------------------------|--------|
| 1  | [MoP] Exeter V40 Opera                                        | 515   | 1.66 | 0.37  | [-0.61 , 1.35] | Non-inferiority not shown | 0.457  |
| 2  | [MoP] Exeter V40 Pinnacle                                     | 471   | 2.43 | 1.14  | [ 0.13 , 2.15] | Non-inferiority not shown | 0.027  |
| 3  | [MoP] Exeter V40 Reflection Cementless                        | 649   | 2.49 | 1.21  | [ 0.06 , 2.35] | Non-inferiority not shown | 0.039  |
| 4  | [MoP] Exeter V40 Trident                                      | 3,769 | 1.68 | 0.40  | [-0.00 , 0.80] | Non-inferiority not shown | 0.051  |
| 5  | [MoP] Exeter V40 Trilogy                                      | 2,555 | 1.46 | 0.18  | [-0.31 , 0.66] | Non-inferiority not shown | 0.473  |
| 6  | [MoP] Exeter V40 Ultima Cemented Cup                          | 321   | 2.77 | 1.48  | [-0.16 , 3.12] | Non-inferiority not shown | 0.077  |
| 7  | [MoP] Furlong Cemented Stem JRI Cemented Cup                  | 396   | 1.48 | 0.19  | [-0.93 , 1.32] | Non-inferiority not shown | 0.735  |
| 8  | [MoP] Furlong HAC Stem CSF                                    | 2,076 | 2.31 | 1.02  | [ 0.40 , 1.64] | Inferior by $\geq 20\%$   | 0.001  |
| 9  | [MoP] Furlong HAC Stem Furlong HAC CSF Plus                   | 686   | 3.15 | 1.86  | [ 0.94 , 2.79] | Inferior by $\geq 20\%$   | <0.001 |
| 10 | [MoP] Muller Straight Stem Original ME Muller Low Profile Cup | 291   | 0.78 | -0.51 | [-1.33 , 0.31] | Non-inferiority not shown | 0.224  |
| 11 | [MoP] Muller-Biomet Apollo                                    | 568   | 1.27 | -0.02 | [-0.85 , 0.81] | Non-inferiority not shown | 0.967  |
| 12 | [MoP] SL-Plus Cementless Stem EP-Fit Plus                     | 672   | 4.08 | 2.79  | [ 1.48 , 4.11] | Inferior by $\geq 100\%$  | <0.001 |
| 13 | [MoP] Stanmore Modular Stem Stanmore-Arcom Cup                | 805   | 1.43 | 0.15  | [-0.59 , 0.89] | Non-inferiority not shown | 0.697  |
| 14 | [MoP] Synergy Cementless Stem Reflection Cementless           | 546   | 2.18 | 0.90  | [-0.31 , 2.10] | Non-inferiority not shown | 0.146  |
| 15 | [MoP] Taperloc Cementless Stem Exceed ABT                     | 657   | 1.71 | 0.42  | [-0.23 , 1.08] | Non-inferiority not shown | 0.208  |
| 16 | [MoP] Versys Cementless Stem Trilogy                          | 336   | 4.56 | 3.28  | [ 1.20 , 5.36] | Inferior by $\geq 20\%$   | 0.002  |

**Supplemental table 6c: Difference in Kaplan-Meier failure estimate between a contemporary reference and implants with at least 250 at risk at 7 years since primary in males**

| Stem/cup brand                                                | Number at risk | Cumulative failure (%) | Difference in failure (%) | 95% CI          | Equivalence status        | p-value |
|---------------------------------------------------------------|----------------|------------------------|---------------------------|-----------------|---------------------------|---------|
| [CoP] Furlong HAC Stem CSF                                    | 1,823          | 1.64                   | [REFERENCE]               |                 |                           |         |
| [CoC] ABG II Monolithic Cementless Stem ABG II Cementless Cup | 469            | 3.52                   | 1.89                      | [ 0.29 , 3.48]  | Non-inferiority not shown | 0.020   |
| [CoC] ABG II Monolithic Cementless Stem Trident               | 365            | 4.06                   | 2.42                      | [ 0.64 , 4.20]  | Inferior by $\geq 20\%$   | 0.008   |
| [CoC] Accolade Trident                                        | 1,234          | 3.47                   | 1.84                      | [ 1.01 , 2.66]  | Inferior by $\geq 20\%$   | <0.001  |
| [CoC] Corail Duraloc Option                                   | 354            | 4.27                   | 2.64                      | [ 0.74 , 4.54]  | Inferior by $\geq 20\%$   | 0.006   |
| [CoC] Corail Pinnacle                                         | 3,192          | 3.28                   | 1.64                      | [ 1.05 , 2.23]  | Inferior by $\geq 20\%$   | <0.001  |
| [CoC] Exeter V40 ABG II Cementless Cup                        | 304            | 1.98                   | 0.35                      | [-1.05 , 1.75]  | Non-inferiority not shown | 0.627   |
| [CoC] Exeter V40 Trident                                      | 2,289          | 2.18                   | 0.54                      | [-0.12 , 1.20]  | Non-inferiority not shown | 0.108   |
| [CoC] Furlong HAC Stem CSF                                    | 630            | 3.34                   | 1.71                      | [ 0.30 , 3.11]  | Non-inferiority not shown | 0.017   |
| [CoC] Furlong HAC Stem Furlong HAC CSF Plus                   | 913            | 2.10                   | 0.47                      | [-0.18 , 1.11]  | Non-inferiority not shown | 0.158   |
| [CoC] SL-Plus Cementless Stem EP-Fit Plus                     | 483            | 6.96                   | 5.33                      | [ 3.28 , 7.38]  | Inferior by $\geq 100\%$  | <0.001  |
| [CoC] Taperloc Cementless Stem Exceed ABT                     | 628            | 2.14                   | 0.51                      | [-0.23 , 1.24]  | Non-inferiority not shown | 0.175   |
| [CoP] C-Stem Cemented Stem Wroblewski Golf Ball               | 252            | 1.47                   | -0.17                     | [-1.44 , 1.11]  | Non-inferiority not shown | 0.796   |
| [CoP] Corail Pinnacle                                         | 611            | 2.30                   | 0.66                      | [-0.12 , 1.45]  | Non-inferiority not shown | 0.098   |
| [CoP] Exeter V40 Exeter Contemporary Flanged                  | 417            | 0.85                   | -0.79                     | [-1.46 , -0.11] | Non-inferior              | 0.022   |
| [CoP] Exeter V40 Trident                                      | 459            | 1.46                   | -0.18                     | [-1.01 , 0.65]  | Non-inferiority not shown | 0.676   |
| [CoP] Exeter V40 Trilogy                                      | 438            | 2.16                   | 0.53                      | [-0.58 , 1.64]  | Non-inferiority not shown | 0.351   |
| [MoP] Accolade Trident                                        | 1,060          | 4.24                   | 2.60                      | [ 1.71 , 3.49]  | Inferior by $\geq 100\%$  | <0.001  |
| [MoP] C-Stem Cemented Stem Charnley and Elite Plus LPW        | 384            | 1.01                   | -0.62                     | [-1.63 , 0.39]  | Non-inferiority not shown | 0.227   |
| [MoP] C-Stem Cemented Stem Elite Plus Ogee                    | 654            | 1.54                   | -0.09                     | [-0.94 , 0.76]  | Non-inferiority not shown | 0.830   |
| [MoP] C-Stem Cemented Stem Opera                              | 282            | 2.55                   | 0.92                      | [-0.56 , 2.40]  | Non-inferiority not shown | 0.225   |
| [MoP] CPT Elite Plus Ogee                                     | 436            | 2.51                   | 0.87                      | [-0.29 , 2.03]  | Non-inferiority not shown | 0.140   |
| [MoP] CPT Trilogy                                             | 1,134          | 2.68                   | 1.04                      | [ 0.28 , 1.81]  | Non-inferiority not shown | 0.008   |
| [MoP] CPT ZCA                                                 | 1,009          | 3.27                   | 1.63                      | [ 0.71 , 2.56]  | Inferior by $\geq 20\%$   | 0.001   |
| [MoP] Charnley Cemented Stem Charnley Cemented Cup            | 1,126          | 2.94                   | 1.31                      | [ 0.31 , 2.30]  | Non-inferiority not shown | 0.010   |
| [MoP] Charnley Cemented Stem Charnley Ogee                    | 2,211          | 3.41                   | 1.77                      | [ 0.96 , 2.58]  | Inferior by $\geq 20\%$   | <0.001  |
| [MoP] Charnley Cemented Stem Charnley and Elite Plus LPW      | 1,116          | 1.90                   | 0.26                      | [-0.57 , 1.09]  | Non-inferiority not shown | 0.539   |
| [MoP] Charnley Cemented Stem Wroblewski Golf Ball             | 256            | 2.09                   | 0.46                      | [-1.07 , 1.98]  | Non-inferiority not shown | 0.559   |
| [MoP] Corail Duraloc Cementless Cup                           | 967            | 3.62                   | 1.98                      | [ 0.84 , 3.13]  | Inferior by $\geq 20\%$   | 0.001   |
| [MoP] Corail Pinnacle                                         | 2,826          | 2.42                   | 0.79                      | [ 0.21 , 1.37]  | Non-inferiority not shown | 0.008   |
| [MoP] Corail Trilogy                                          | 323            | 3.87                   | 2.23                      | [ 0.58 , 3.89]  | Inferior by $\geq 20\%$   | 0.008   |
| [MoP] Exeter V40 Cenator Cemented Cup                         | 415            | 2.35                   | 0.71                      | [-0.55 , 1.97]  | Non-inferiority not shown | 0.267   |
| [MoP] Exeter V40 Charnley and Elite Plus LPW                  | 294            | 1.33                   | -0.30                     | [-1.29 , 0.68]  | Non-inferiority not shown | 0.547   |
| [MoP] Exeter V40 Elite Plus Cemented Cup                      | 608            | 1.20                   | -0.44                     | [-1.20 , 0.33]  | Non-inferiority not shown | 0.266   |
| [MoP] Exeter V40 Elite Plus Ogee                              | 2,790          | 1.68                   | 0.04                      | [-0.56 , 0.64]  | Non-inferiority not shown | 0.888   |
| [MoP] Exeter V40 Exeter Contemporary Flanged                  | 5,272          | 2.01                   | 0.37                      | [-0.18 , 0.92]  | Non-inferiority not shown | 0.183   |
| [MoP] Exeter V40 Exeter Contemporary Hooded                   | 2,263          | 2.84                   | 1.20                      | [ 0.53 , 1.88]  | Inferior by $\geq 20\%$   | <0.001  |
| [MoP] Exeter V40 Exeter Duration                              | 2,100          | 3.36                   | 1.72                      | [ 0.96 , 2.49]  | Inferior by $\geq 20\%$   | <0.001  |
| [MoP] Exeter V40 Opera                                        | 340            | 2.14                   | 0.50                      | [-0.75 , 1.75]  | Non-inferiority not shown | 0.432   |
| [MoP] Exeter V40 Reflection Cementless                        | 483            | 3.34                   | 1.70                      | [ 0.29 , 3.12]  | Non-inferiority not shown | 0.018   |

|    |                                                     |       |      |       |                |                           |        |
|----|-----------------------------------------------------|-------|------|-------|----------------|---------------------------|--------|
| 1  | [MoP] Exeter V40 Trident                            | 2,065 | 2.04 | 0.41  | [-0.20 , 1.01] | Non-inferiority not shown | 0.191  |
| 2  | [MoP] Exeter V40 Trilogy                            | 1,688 | 1.88 | 0.25  | [-0.44 , 0.93] | Non-inferiority not shown | 0.477  |
| 3  | [MoP] Exeter V40 Ultima Cemented Cup                | 282   | 2.77 | 1.13  | [-0.55 , 2.82] | Non-inferiority not shown | 0.188  |
| 4  | [MoP] Furlong Cemented Stem JRI Cemented Cup        | 312   | 1.77 | 0.13  | [-1.18 , 1.45] | Non-inferiority not shown | 0.843  |
| 5  | [MoP] Furlong HAC Stem CSF                          | 1,556 | 3.09 | 1.46  | [ 0.62 , 2.29] | Inferior by $\geq 20\%$   | 0.001  |
| 6  | [MoP] Furlong HAC Stem Furlong HAC CSF Plus         | 265   | 3.66 | 2.02  | [ 0.80 , 3.25] | Inferior by $\geq 20\%$   | 0.001  |
| 7  | [MoP] Muller-Biomet Apollo                          | 376   | 1.46 | -0.18 | [-1.17 , 0.81] | Non-inferiority not shown | 0.722  |
| 8  | [MoP] SL-Plus Cementless Stem EP-Fit Plus           | 483   | 5.32 | 3.69  | [ 2.08 , 5.29] | Inferior by $\geq 100\%$  | <0.001 |
| 9  | [MoP] Stanmore Modular Stem Stanmore-Arcom Cup      | 529   | 1.86 | 0.23  | [-0.74 , 1.20] | Non-inferiority not shown | 0.644  |
| 10 | [MoP] Synergy Cementless Stem Reflection Cementless | 396   | 2.37 | 0.73  | [-0.59 , 2.05] | Non-inferiority not shown | 0.277  |
| 11 | [MoP] Versys Cementless Stem Trilogy                | 297   | 4.56 | 2.93  | [ 0.81 , 5.05] | Inferior by $\geq 20\%$   | 0.007  |

For peer review only

11  
12  
13  
14  
15  
16  
17  
18  
19  
20  
21  
22  
23  
24  
25  
26  
27  
28  
29  
30  
31  
32  
33  
34  
35  
36  
37  
38  
39  
40  
41  
42  
43  
44  
45  
46

**Supplemental table 6d: Difference in Kaplan-Meier failure estimate between a contemporary reference and implants with at least 250 at risk at 10 years since primary in males**

| Stem/cup brand                                                | Number at risk | Cumulative failure (%) | Difference in failure (%) | 95% CI         | Equivalence status        | p-value |
|---------------------------------------------------------------|----------------|------------------------|---------------------------|----------------|---------------------------|---------|
| [CoP] Furlong HAC Stem CSF                                    | 1,054          | 2.03                   | [REFERENCE]               |                |                           |         |
| [CoC] ABG II Monolithic Cementless Stem ABG II Cementless Cup | 348            | 5.43                   | 3.40                      | [ 1.33 , 5.47] | Inferior by $\geq 20\%$   | 0.001   |
| [CoC] Corail Pinnacle                                         | 363            | 4.24                   | 2.21                      | [ 1.28 , 3.15] | Inferior by $\geq 20\%$   | <0.001  |
| [CoC] Exeter V40 Trident                                      | 767            | 2.76                   | 0.74                      | [-0.10 , 1.57] | Non-inferiority not shown | 0.083   |
| [CoC] Furlong HAC Stem CSF                                    | 360            | 4.28                   | 2.25                      | [ 0.60 , 3.90] | Inferior by $\geq 20\%$   | 0.008   |
| [MoP] C-Stem Cemented Stem Elite Plus Ogee                    | 313            | 2.71                   | 0.68                      | [-0.63 , 1.98] | Non-inferiority not shown | 0.308   |
| [MoP] CPT Trilogy                                             | 382            | 4.61                   | 2.58                      | [ 1.24 , 3.92] | Inferior by $\geq 20\%$   | <0.001  |
| [MoP] CPT ZCA                                                 | 332            | 4.41                   | 2.38                      | [ 1.15 , 3.61] | Inferior by $\geq 20\%$   | <0.001  |
| [MoP] Charnley Cemented Stem Charnley Cemented Cup            | 615            | 4.69                   | 2.66                      | [ 1.32 , 4.00] | Inferior by $\geq 20\%$   | <0.001  |
| [MoP] Charnley Cemented Stem Charnley Ogee                    | 1,151          | 5.08                   | 3.05                      | [ 2.00 , 4.10] | Inferior by $\geq 20\%$   | <0.001  |
| [MoP] Charnley Cemented Stem Charnley and Elite Plus LPW      | 661            | 2.93                   | 0.90                      | [-0.21 , 2.01] | Non-inferiority not shown | 0.114   |
| [MoP] Corail Duraloc Cementless Cup                           | 418            | 6.69                   | 4.66                      | [ 2.92 , 6.41] | Inferior by $\geq 100\%$  | <0.001  |
| [MoP] Corail Pinnacle                                         | 638            | 3.49                   | 1.47                      | [ 0.63 , 2.30] | Inferior by $\geq 20\%$   | 0.001   |
| [MoP] Exeter V40 Elite Plus Ogee                              | 1,105          | 2.53                   | 0.51                      | [-0.31 , 1.32] | Non-inferiority not shown | 0.226   |
| [MoP] Exeter V40 Exeter Contemporary Flanged                  | 1,517          | 2.88                   | 0.85                      | [ 0.13 , 1.57] | Non-inferiority not shown | 0.020   |
| [MoP] Exeter V40 Exeter Contemporary Hooded                   | 760            | 4.17                   | 2.15                      | [ 1.19 , 3.11] | Inferior by $\geq 20\%$   | <0.001  |
| [MoP] Exeter V40 Exeter Duration                              | 888            | 4.95                   | 2.92                      | [ 1.88 , 3.96] | Inferior by $\geq 20\%$   | <0.001  |
| [MoP] Exeter V40 Trident                                      | 402            | 2.84                   | 0.81                      | [-0.12 , 1.74] | Non-inferiority not shown | 0.089   |
| [MoP] Exeter V40 Trilogy                                      | 583            | 3.02                   | 0.99                      | [ 0.02 , 1.96] | Non-inferiority not shown | 0.045   |
| [MoP] Furlong HAC Stem CSF                                    | 609            | 4.76                   | 2.73                      | [ 1.56 , 3.90] | Inferior by $\geq 20\%$   | <0.001  |



**Supplemental table 7a: Difference in Kaplan-Meier failure estimate between a contemporary reference and implants with at least 250 at risk at 3 years since primary in males <55 years**

| Stem/cup brand                              | Number at risk | Cumulative failure (%) | Difference in failure (%) | 95% CI         | Equivalence status        | p-value |
|---------------------------------------------|----------------|------------------------|---------------------------|----------------|---------------------------|---------|
| [CoC] Exeter V40 Trident                    | 1,269          | 1.26                   | [REFERENCE]               |                |                           |         |
| [CoC] Accolade Trident                      | 730            | 2.96                   | 1.70                      | [ 0.41 , 3.00] | Inferior by $\geq 20\%$   | 0.010   |
| [CoC] Corail Pinnacle                       | 3,796          | 2.29                   | 1.03                      | [ 0.33 , 1.74] | Inferior by $\geq 20\%$   | 0.004   |
| [CoC] Furlong HAC Stem Furlong HAC CSF Plus | 837            | 1.71                   | 0.46                      | [-0.49 , 1.41] | Non-inferiority not shown | 0.345   |
| [CoC] M/L Taper Cementless Continuum        | 296            | 2.21                   | 0.95                      | [-0.59 , 2.49] | Non-inferiority not shown | 0.226   |
| [CoC] Taperloc Cementless Stem Exceed ABT   | 836            | 2.23                   | 0.98                      | [-0.05 , 2.00] | Non-inferiority not shown | 0.062   |
| [CoP] Accolade Trident                      | 251            | 2.12                   | 0.87                      | [-0.64 , 2.37] | Non-inferiority not shown | 0.259   |
| [CoP] Corail Pinnacle                       | 509            | 1.90                   | 0.64                      | [-0.34 , 1.62] | Non-inferiority not shown | 0.201   |
| [CoP] Exeter V40 Trident                    | 369            | 0.81                   | -0.44                     | [-1.25 , 0.37] | Non-inferiority not shown | 0.286   |
| [MoP] Corail Pinnacle                       | 417            | 1.20                   | -0.06                     | [-1.12 , 1.00] | Non-inferiority not shown | 0.915   |

Supplemental table 7b: Difference in Kaplan-Meier failure estimate between a contemporary reference and implants with at least 250 at risk at 5 years since primary in males <55 years

| Stem/cup brand                              | Number at risk | Cumulative failure (%) | Difference in failure (%) | 95% CI          | Equivalence status        | p-value |
|---------------------------------------------|----------------|------------------------|---------------------------|-----------------|---------------------------|---------|
| [CoC] Corail Pinnacle                       | 2,313          | 3.33                   | [REFERENCE]               |                 |                           |         |
| [CoC] Accolade Trident                      | 502            | 4.15                   | 0.82                      | [-0.70 , 2.34]  | Non-inferiority not shown | 0.290   |
| [CoC] Exeter V40 Trident                    | 934            | 1.87                   | -1.46                     | [-2.36 , -0.56] | Non-inferior              | 0.001   |
| [CoC] Furlong HAC Stem Furlong HAC CSF Plus | 494            | 1.85                   | -1.48                     | [-2.45 , -0.50] | Non-inferior              | 0.003   |
| [CoC] Taperloc Cementless Stem Exceed ABT   | 430            | 2.57                   | -0.76                     | [-1.88 , 0.35]  | Non-inferior              | 0.179   |

**Supplemental table 8a: Difference in Kaplan-Meier failure estimate between a contemporary reference and implants with at least 250 at risk at 3 years since primary in males between 55 and 75 years**

| Stem/cup brand                                                | Number at risk | Cumulative failure (%) | Difference in failure (%) | 95% CI          | Equivalence status        | p-value |
|---------------------------------------------------------------|----------------|------------------------|---------------------------|-----------------|---------------------------|---------|
| [CoP] Exeter V40 Trident                                      | 1,339          | 0.83                   | [REFERENCE]               |                 |                           |         |
| [CoC] ABG II Monolithic Cementless Stem ABG II Cementless Cup | 408            | 2.58                   | 1.75                      | [ 0.21 , 3.30]  | Inferior by $\geq 20\%$   | 0.026   |
| [CoC] ABG II Monolithic Cementless Stem Trident               | 368            | 1.82                   | 0.99                      | [-0.39 , 2.37]  | Non-inferiority not shown | 0.159   |
| [CoC] Accolade Trident                                        | 2,101          | 2.16                   | 1.33                      | [ 0.64 , 2.02]  | Inferior by $\geq 20\%$   | <0.001  |
| [CoC] Bimetric Cementless Stem Exceed ABT                     | 279            | 0.60                   | -0.22                     | [-1.13 , 0.68]  | Non-inferiority not shown | 0.628   |
| [CoC] Corail Duraloc Option                                   | 311            | 1.86                   | 1.04                      | [-0.48 , 2.55]  | Non-inferiority not shown | 0.181   |
| [CoC] Corail Pinnacle                                         | 8,280          | 1.71                   | 0.89                      | [ 0.46 , 1.31]  | Inferior by $\geq 20\%$   | <0.001  |
| [CoC] Excia Cementless Plasmacup SC                           | 284            | 1.25                   | 0.42                      | [-0.72 , 1.57]  | Non-inferiority not shown | 0.468   |
| [CoC] Exeter V40 ABG II Cementless Cup                        | 324            | 0.80                   | -0.03                     | [-0.99 , 0.93]  | Non-inferiority not shown | 0.949   |
| [CoC] Exeter V40 Trident                                      | 2,957          | 1.06                   | 0.23                      | [-0.26 , 0.72]  | Non-inferiority not shown | 0.350   |
| [CoC] Furlong HAC Stem CSF                                    | 452            | 3.36                   | 2.53                      | [ 0.88 , 4.19]  | Inferior by $\geq 100\%$  | 0.003   |
| [CoC] Furlong HAC Stem Furlong HAC CSF Plus                   | 2,839          | 1.63                   | 0.80                      | [ 0.27 , 1.33]  | Inferior by $\geq 20\%$   | 0.003   |
| [CoC] M/L Taper Cementless Continuum                          | 405            | 1.41                   | 0.58                      | [-0.45 , 1.61]  | Non-inferiority not shown | 0.269   |
| [CoC] Polarstem Cementless R3 Cementless                      | 256            | 0.54                   | -0.29                     | [-1.11 , 0.54]  | Non-inferiority not shown | 0.496   |
| [CoC] SL-Plus Cementless Stem EP-Fit Plus                     | 398            | 4.90                   | 4.07                      | [ 2.00 , 6.14]  | Inferior by $\geq 100\%$  | <0.001  |
| [CoC] Taperloc Cementless Stem Exceed ABT                     | 2,008          | 1.40                   | 0.58                      | [ 0.02 , 1.13]  | Non-inferiority not shown | 0.041   |
| [CoP] Accolade Trident                                        | 975            | 1.56                   | 0.73                      | [ 0.03 , 1.44]  | Non-inferiority not shown | 0.042   |
| [CoP] C-Stem Cemented Stem Marathon                           | 344            | 0.69                   | -0.14                     | [-0.92 , 0.64]  | Non-inferiority not shown | 0.726   |
| [CoP] C-Stem Cemented Stem Wroblewski Golf Ball               | 273            | 0.31                   | -0.52                     | [-1.21 , 0.17]  | Non-inferiority not shown | 0.142   |
| [CoP] CPT Trilogy                                             | 274            | 1.73                   | 0.90                      | [-0.14 , 1.94]  | Non-inferiority not shown | 0.089   |
| [CoP] Corail Marathon                                         | 368            | 1.84                   | 1.02                      | [-0.12 , 2.15]  | Non-inferiority not shown | 0.079   |
| [CoP] Corail Pinnacle                                         | 2,678          | 0.94                   | 0.11                      | [-0.33 , 0.54]  | Non-inferiority not shown | 0.630   |
| [CoP] Exeter V40 Charnley and Elite Plus LPW                  | 275            | 1.16                   | 0.33                      | [-0.85 , 1.52]  | Non-inferiority not shown | 0.585   |
| [CoP] Exeter V40 Elite Plus Ogee                              | 420            | 0.56                   | -0.27                     | [-0.99 , 0.45]  | Non-inferiority not shown | 0.467   |
| [CoP] Exeter V40 Exeter Contemporary Flanged                  | 919            | 0.88                   | 0.06                      | [-0.57 , 0.68]  | Non-inferiority not shown | 0.862   |
| [CoP] Exeter V40 Exeter X3 Rimfit                             | 649            | 1.27                   | 0.44                      | [-0.27 , 1.15]  | Non-inferiority not shown | 0.225   |
| [CoP] Exeter V40 Trilogy                                      | 599            | 1.36                   | 0.53                      | [-0.42 , 1.48]  | Non-inferiority not shown | 0.274   |
| [CoP] Furlong HAC Stem CSF                                    | 1,990          | 0.93                   | 0.11                      | [-0.43 , 0.64]  | Non-inferiority not shown | 0.699   |
| [CoP] Furlong HAC Stem Furlong HAC CSF Plus                   | 563            | 1.40                   | 0.58                      | [-0.29 , 1.44]  | Non-inferiority not shown | 0.193   |
| [CoP] MS-30 Original ME Muller Low Profile Cup                | 375            | 0.21                   | -0.62                     | [-1.16 , -0.07] | Non-inferior              | 0.026   |
| [CoP] SL-Plus Cementless Stem EP-Fit Plus                     | 268            | 1.45                   | 0.62                      | [-0.83 , 2.07]  | Non-inferiority not shown | 0.404   |
| [CoP] Taperloc Cementless Stem Exceed ABT                     | 601            | 1.04                   | 0.21                      | [-0.48 , 0.89]  | Non-inferiority not shown | 0.552   |
| [MoP] Accolade Trident                                        | 2,467          | 2.30                   | 1.47                      | [ 0.83 , 2.12]  | Inferior by $\geq 100\%$  | <0.001  |
| [MoP] Anthology R3 Cementless                                 | 292            | 2.08                   | 1.25                      | [ 0.01 , 2.49]  | Non-inferiority not shown | 0.048   |
| [MoP] C-Stem AMT Cemented Stem Charnley and Elite Plus LPW    | 419            | 1.68                   | 0.85                      | [-0.36 , 2.06]  | Non-inferiority not shown | 0.167   |
| [MoP] C-Stem AMT Cemented Stem Marathon                       | 256            | 1.18                   | 0.35                      | [-0.62 , 1.32]  | Non-inferiority not shown | 0.475   |
| [MoP] C-Stem AMT Cemented Stem Pinnacle                       | 322            | 1.15                   | 0.32                      | [-0.55 , 1.19]  | Non-inferiority not shown | 0.474   |
| [MoP] C-Stem Cemented Stem Charnley and Elite Plus LPW        | 322            | 1.16                   | 0.34                      | [-0.85 , 1.52]  | Non-inferiority not shown | 0.579   |
| [MoP] C-Stem Cemented Stem Elite Plus Ogee                    | 830            | 1.26                   | 0.43                      | [-0.36 , 1.23]  | Non-inferiority not shown | 0.283   |

|    |                                                          |       |      |       |                |                           |        |
|----|----------------------------------------------------------|-------|------|-------|----------------|---------------------------|--------|
| 1  | [MoP] C-Stem Cemented Stem Marathon                      | 418   | 1.27 | 0.44  | [-0.53 , 1.41] | Non-inferiority not shown | 0.372  |
| 2  | [MoP] C-Stem Cemented Stem Opera                         | 391   | 1.47 | 0.64  | [-0.58 , 1.86] | Non-inferiority not shown | 0.301  |
| 3  | [MoP] CPT Elite Plus Ogee                                | 550   | 1.47 | 0.64  | [-0.37 , 1.65] | Non-inferiority not shown | 0.217  |
| 4  | [MoP] CPT Trilogy                                        | 1,745 | 1.63 | 0.80  | [ 0.18 , 1.42] | Inferior by $\geq 20\%$   | 0.012  |
| 5  | [MoP] CPT ZCA                                            | 1,031 | 1.26 | 0.43  | [-0.25 , 1.12] | Non-inferiority not shown | 0.213  |
| 6  | [MoP] Charnley Cemented Stem Charnley Cemented Cup       | 1,058 | 1.60 | 0.77  | [-0.04 , 1.58] | Non-inferiority not shown | 0.063  |
| 7  | [MoP] Charnley Cemented Stem Charnley Ogee               | 2,239 | 1.38 | 0.55  | [-0.03 , 1.13] | Non-inferiority not shown | 0.064  |
| 8  | [MoP] Charnley Cemented Stem Charnley and Elite Plus LPW | 1,040 | 0.88 | 0.05  | [-0.59 , 0.69] | Non-inferiority not shown | 0.886  |
| 9  | [MoP] Charnley Cemented Stem Opera                       | 280   | 1.36 | 0.53  | [-0.84 , 1.90] | Non-inferiority not shown | 0.446  |
| 10 | [MoP] Corail Duraloc Cementless Cup                      | 978   | 1.96 | 1.13  | [ 0.21 , 2.05] | Inferior by $\geq 20\%$   | 0.016  |
| 11 | [MoP] Corail Elite Plus Ogee                             | 308   | 1.86 | 1.03  | [-0.38 , 2.44] | Non-inferiority not shown | 0.153  |
| 12 | [MoP] Corail Marathon                                    | 645   | 1.37 | 0.54  | [-0.27 , 1.35] | Non-inferiority not shown | 0.188  |
| 13 | [MoP] Corail Pinnacle                                    | 7,845 | 1.52 | 0.69  | [ 0.28 , 1.11] | Inferior by $\geq 20\%$   | 0.001  |
| 14 | [MoP] Corail Trilogy                                     | 517   | 1.76 | 0.93  | [-0.20 , 2.07] | Non-inferiority not shown | 0.108  |
| 15 | [MoP] Exeter V40 Cenator Cemented Cup                    | 395   | 1.46 | 0.63  | [-0.58 , 1.84] | Non-inferiority not shown | 0.307  |
| 16 | [MoP] Exeter V40 Charnley and Elite Plus LPW             | 397   | 1.70 | 0.87  | [-0.35 , 2.09] | Non-inferiority not shown | 0.164  |
| 17 | [MoP] Exeter V40 Duraloc Cementless Cup                  | 265   | 2.54 | 1.71  | [-0.18 , 3.60] | Non-inferiority not shown | 0.076  |
| 18 | [MoP] Exeter V40 Elite Plus Cemented Cup                 | 749   | 0.95 | 0.12  | [-0.62 , 0.86] | Non-inferiority not shown | 0.748  |
| 19 | [MoP] Exeter V40 Elite Plus Ogee                         | 3,262 | 1.05 | 0.22  | [-0.26 , 0.69] | Non-inferiority not shown | 0.369  |
| 20 | [MoP] Exeter V40 Exeter Contemporary Flanged             | 8,180 | 1.18 | 0.35  | [-0.05 , 0.75] | Non-inferiority not shown | 0.090  |
| 21 | [MoP] Exeter V40 Exeter Contemporary Hooded              | 2,960 | 1.74 | 0.91  | [ 0.36 , 1.45] | Inferior by $\geq 20\%$   | 0.001  |
| 22 | [MoP] Exeter V40 Exeter Duration                         | 2,482 | 1.53 | 0.70  | [ 0.13 , 1.27] | Non-inferiority not shown | 0.016  |
| 23 | [MoP] Exeter V40 Exeter X3 Rimfit                        | 1,213 | 1.48 | 0.65  | [ 0.03 , 1.28] | Non-inferiority not shown | 0.039  |
| 24 | [MoP] Exeter V40 Marathon                                | 261   | 0.86 | 0.03  | [-0.80 , 0.85] | Non-inferiority not shown | 0.946  |
| 25 | [MoP] Exeter V40 Opera                                   | 414   | 0.71 | -0.12 | [-0.99 , 0.75] | Non-inferiority not shown | 0.785  |
| 26 | [MoP] Exeter V40 Pinnacle                                | 462   | 1.75 | 0.92  | [-0.12 , 1.97] | Non-inferiority not shown | 0.084  |
| 27 | [MoP] Exeter V40 Reflection Cementless                   | 467   | 1.44 | 0.61  | [-0.50 , 1.72] | Non-inferiority not shown | 0.284  |
| 28 | [MoP] Exeter V40 Trident                                 | 4,119 | 1.23 | 0.40  | [-0.04 , 0.85] | Non-inferiority not shown | 0.074  |
| 29 | [MoP] Exeter V40 Trilogy                                 | 2,325 | 1.03 | 0.20  | [-0.32 , 0.71] | Non-inferiority not shown | 0.455  |
| 30 | [MoP] Furlong Cemented Stem JRI Cemented Cup             | 250   | 1.52 | 0.69  | [-0.83 , 2.21] | Non-inferiority not shown | 0.371  |
| 31 | [MoP] Furlong HAC Stem CSF                               | 1,718 | 1.67 | 0.84  | [ 0.17 , 1.51] | Inferior by $\geq 20\%$   | 0.014  |
| 32 | [MoP] Furlong HAC Stem Furlong HAC CSF Plus              | 689   | 2.04 | 1.21  | [ 0.27 , 2.14] | Inferior by $\geq 20\%$   | 0.011  |
| 33 | [MoP] M/L Taper Cementless Allofit                       | 280   | 1.41 | 0.58  | [-0.69 , 1.85] | Non-inferiority not shown | 0.373  |
| 34 | [MoP] Muller-Biomet Apollo                               | 460   | 1.24 | 0.41  | [-0.63 , 1.46] | Non-inferiority not shown | 0.438  |
| 35 | [MoP] Polarstem Cementless R3 Cementless                 | 330   | 1.22 | 0.39  | [-0.35 , 1.13] | Non-inferiority not shown | 0.302  |
| 36 | [MoP] SL-Plus Cementless Stem EP-Fit Plus                | 642   | 3.41 | 2.58  | [ 1.24 , 3.91] | Inferior by $\geq 100\%$  | <0.001 |
| 37 | [MoP] Stanmore Modular Stem Stanmore-Arcom Cup           | 546   | 0.90 | 0.07  | [-0.72 , 0.87] | Non-inferiority not shown | 0.856  |
| 38 | [MoP] Synergy Cementless Stem R3 Cementless              | 318   | 1.21 | 0.38  | [-0.54 , 1.29] | Non-inferiority not shown | 0.416  |
| 39 | [MoP] Synergy Cementless Stem Reflection Cementless      | 439   | 1.54 | 0.71  | [-0.47 , 1.89] | Non-inferiority not shown | 0.239  |
| 40 | [MoP] Taperloc Cementless Stem Exceed ABT                | 971   | 1.32 | 0.49  | [-0.18 , 1.17] | Non-inferiority not shown | 0.154  |
| 41 | [MoP] Versys Cementless Stem Trilogy                     | 282   | 3.38 | 2.55  | [ 0.46 , 4.64] | Inferior by $\geq 20\%$   | 0.017  |

**Supplemental table 8b: Difference in Kaplan-Meier failure estimate between a contemporary reference and implants with at least 250 at risk at 5 years since primary in males between 55 and 75 years**

| Stem/cup brand                                                | Number at risk | Cumulative failure (%) | Difference in failure (%) | 95% CI          | Equivalence status        | p-value |
|---------------------------------------------------------------|----------------|------------------------|---------------------------|-----------------|---------------------------|---------|
| [CoP] Furlong HAC Stem CSF                                    | 1,759          | 1.09                   | [REFERENCE]               |                 |                           |         |
| [CoC] ABG II Monolithic Cementless Stem ABG II Cementless Cup | 392            | 2.82                   | 1.73                      | [ 0.09 , 3.37]  | Non-inferiority not shown | 0.038   |
| [CoC] ABG II Monolithic Cementless Stem Trident               | 306            | 3.89                   | 2.80                      | [ 0.74 , 4.85]  | Inferior by $\geq 20\%$   | 0.008   |
| [CoC] Accolade Trident                                        | 1,624          | 2.87                   | 1.77                      | [ 0.94 , 2.60]  | Inferior by $\geq 20\%$   | <0.001  |
| [CoC] Corail Duraloc Option                                   | 303            | 2.50                   | 1.41                      | [-0.36 , 3.18]  | Non-inferiority not shown | 0.119   |
| [CoC] Corail Pinnacle                                         | 5,229          | 2.37                   | 1.28                      | [ 0.74 , 1.82]  | Inferior by $\geq 20\%$   | <0.001  |
| [CoC] Exeter V40 ABG II Cementless Cup                        | 269            | 1.15                   | 0.06                      | [-1.16 , 1.28]  | Non-inferiority not shown | 0.924   |
| [CoC] Exeter V40 Trident                                      | 2,279          | 1.74                   | 0.65                      | [ 0.00 , 1.29]  | Non-inferiority not shown | 0.049   |
| [CoC] Furlong HAC Stem CSF                                    | 438            | 3.80                   | 2.70                      | [ 0.93 , 4.48]  | Inferior by $\geq 20\%$   | 0.003   |
| [CoC] Furlong HAC Stem Furlong HAC CSF Plus                   | 1,705          | 1.86                   | 0.76                      | [ 0.13 , 1.40]  | Non-inferiority not shown | 0.018   |
| [CoC] SL-Plus Cementless Stem EP-Fit Plus                     | 367            | 5.89                   | 4.79                      | [ 2.51 , 7.08]  | Inferior by $\geq 100\%$  | <0.001  |
| [CoC] Taperloc Cementless Stem Exceed ABT                     | 1,161          | 1.61                   | 0.52                      | [-0.15 , 1.18]  | Non-inferiority not shown | 0.127   |
| [CoP] Accolade Trident                                        | 422            | 1.94                   | 0.85                      | [-0.03 , 1.72]  | Non-inferiority not shown | 0.057   |
| [CoP] Corail Pinnacle                                         | 1,340          | 1.58                   | 0.48                      | [-0.14 , 1.11]  | Non-inferiority not shown | 0.131   |
| [CoP] Exeter V40 Elite Plus Ogee                              | 294            | 0.88                   | -0.21                     | [-1.21 , 0.79]  | Non-inferiority not shown | 0.680   |
| [CoP] Exeter V40 Exeter Contemporary Flanged                  | 635            | 0.88                   | -0.21                     | [-0.90 , 0.48]  | Non-inferiority not shown | 0.548   |
| [CoP] Exeter V40 Trident                                      | 670            | 0.97                   | -0.12                     | [-0.75 , 0.51]  | Non-inferiority not shown | 0.701   |
| [CoP] Exeter V40 Trilogy                                      | 492            | 1.71                   | 0.62                      | [-0.48 , 1.72]  | Non-inferiority not shown | 0.272   |
| [CoP] Furlong HAC Stem Furlong HAC CSF Plus                   | 327            | 1.60                   | 0.51                      | [-0.48 , 1.50]  | Non-inferiority not shown | 0.313   |
| [CoP] MS-30 Original ME Muller Low Profile Cup                | 267            | 0.21                   | -0.88                     | [-1.49 , -0.27] | Non-inferior              | 0.005   |
| [MoP] Accolade Trident                                        | 1,703          | 3.33                   | 2.24                      | [ 1.42 , 3.05]  | Inferior by $\geq 100\%$  | <0.001  |
| [MoP] C-Stem AMT Cemented Stem Charnley and Elite Plus LPW    | 283            | 1.68                   | 0.58                      | [-0.65 , 1.82]  | Non-inferiority not shown | 0.355   |
| [MoP] C-Stem Cemented Stem Charnley and Elite Plus LPW        | 296            | 1.16                   | 0.07                      | [-1.15 , 1.29]  | Non-inferiority not shown | 0.911   |
| [MoP] C-Stem Cemented Stem Elite Plus Ogee                    | 639            | 1.26                   | 0.17                      | [-0.67 , 1.01]  | Non-inferiority not shown | 0.696   |
| [MoP] C-Stem Cemented Stem Opera                              | 288            | 2.29                   | 1.20                      | [-0.35 , 2.75]  | Non-inferiority not shown | 0.129   |
| [MoP] CPT Elite Plus Ogee                                     | 426            | 2.12                   | 1.02                      | [-0.25 , 2.30]  | Non-inferiority not shown | 0.116   |
| [MoP] CPT Trilogy                                             | 1,247          | 2.23                   | 1.14                      | [ 0.35 , 1.92]  | Inferior by $\geq 20\%$   | 0.005   |
| [MoP] CPT ZCA                                                 | 825            | 1.91                   | 0.81                      | [-0.09 , 1.71]  | Non-inferiority not shown | 0.076   |
| [MoP] Charnley Cemented Stem Charnley Cemented Cup            | 942            | 2.86                   | 1.76                      | [ 0.67 , 2.85]  | Inferior by $\geq 20\%$   | 0.002   |
| [MoP] Charnley Cemented Stem Charnley Ogee                    | 1,978          | 2.45                   | 1.35                      | [ 0.58 , 2.13]  | Inferior by $\geq 20\%$   | 0.001   |
| [MoP] Charnley Cemented Stem Charnley and Elite Plus LPW      | 929            | 1.28                   | 0.19                      | [-0.62 , 0.99]  | Non-inferiority not shown | 0.650   |
| [MoP] Corail Duraloc Cementless Cup                           | 923            | 2.79                   | 1.69                      | [ 0.58 , 2.80]  | Inferior by $\geq 20\%$   | 0.003   |
| [MoP] Corail Marathon                                         | 326            | 1.77                   | 0.67                      | [-0.34 , 1.69]  | Non-inferiority not shown | 0.193   |
| [MoP] Corail Pinnacle                                         | 4,602          | 1.85                   | 0.76                      | [ 0.24 , 1.28]  | Inferior by $\geq 20\%$   | 0.004   |
| [MoP] Corail Trilogy                                          | 393            | 2.43                   | 1.34                      | [-0.05 , 2.72]  | Non-inferiority not shown | 0.059   |
| [MoP] Exeter V40 Cenator Cemented Cup                         | 337            | 1.97                   | 0.87                      | [-0.55 , 2.30]  | Non-inferiority not shown | 0.229   |
| [MoP] Exeter V40 Charnley and Elite Plus LPW                  | 317            | 1.70                   | 0.60                      | [-0.65 , 1.86]  | Non-inferiority not shown | 0.347   |
| [MoP] Exeter V40 Duraloc Cementless Cup                       | 252            | 2.92                   | 1.83                      | [-0.22 , 3.87]  | Non-inferiority not shown | 0.080   |
| [MoP] Exeter V40 Elite Plus Cemented Cup                      | 583            | 1.39                   | 0.30                      | [-0.64 , 1.23]  | Non-inferiority not shown | 0.533   |

|    |                                                     |       |      |      |                |                           |        |
|----|-----------------------------------------------------|-------|------|------|----------------|---------------------------|--------|
| 1  | [MoP] Exeter V40 Elite Plus Ogee                    | 2,569 | 1.35 | 0.26 | [-0.33 , 0.85] | Non-inferiority not shown | 0.390  |
| 2  | [MoP] Exeter V40 Exeter Contemporary Flanged        | 5,599 | 1.66 | 0.56 | [ 0.04 , 1.08] | Non-inferiority not shown | 0.033  |
| 3  | [MoP] Exeter V40 Exeter Contemporary Hooded         | 2,246 | 2.26 | 1.17 | [ 0.50 , 1.84] | Inferior by $\geq 20\%$   | 0.001  |
| 4  | [MoP] Exeter V40 Exeter Duration                    | 1,970 | 2.29 | 1.20 | [ 0.47 , 1.92] | Inferior by $\geq 20\%$   | 0.001  |
| 5  | [MoP] Exeter V40 Opera                              | 298   | 1.53 | 0.43 | [-0.86 , 1.73] | Non-inferiority not shown | 0.512  |
| 6  | [MoP] Exeter V40 Pinnacle                           | 305   | 2.50 | 1.40 | [ 0.04 , 2.77] | Non-inferiority not shown | 0.044  |
| 7  | [MoP] Exeter V40 Reflection Cementless              | 426   | 2.31 | 1.22 | [-0.21 , 2.64] | Non-inferiority not shown | 0.094  |
| 8  | [MoP] Exeter V40 Trident                            | 2,530 | 1.68 | 0.59 | [ 0.02 , 1.16] | Non-inferiority not shown | 0.044  |
| 9  | [MoP] Exeter V40 Trilogy                            | 1,851 | 1.21 | 0.12 | [-0.50 , 0.74] | Non-inferiority not shown | 0.703  |
| 10 | [MoP] Furlong HAC Stem CSF                          | 1,448 | 1.97 | 0.88 | [ 0.11 , 1.65] | Non-inferiority not shown | 0.026  |
| 11 | [MoP] Furlong HAC Stem Furlong HAC CSF Plus         | 430   | 3.06 | 1.97 | [ 0.70 , 3.23] | Inferior by $\geq 20\%$   | 0.002  |
| 12 | [MoP] Muller-Biomet Apollo                          | 375   | 1.47 | 0.37 | [-0.80 , 1.54] | Non-inferiority not shown | 0.531  |
| 13 | [MoP] SL-Plus Cementless Stem EP-Fit Plus           | 554   | 4.71 | 3.62 | [ 2.00 , 5.24] | Inferior by $\geq 100\%$  | <0.001 |
| 14 | [MoP] Stanmore Modular Stem Stanmore-Arcom Cup      | 434   | 1.51 | 0.41 | [-0.67 , 1.50] | Non-inferiority not shown | 0.455  |
| 15 | [MoP] Synergy Cementless Stem Reflection Cementless | 407   | 2.46 | 1.37 | [-0.14 , 2.87] | Non-inferiority not shown | 0.075  |
| 16 | [MoP] Taperloc Cementless Stem Exceed ABT           | 448   | 1.64 | 0.55 | [-0.32 , 1.41] | Non-inferiority not shown | 0.214  |
| 17 | [MoP] Versys Cementless Stem Trilogy                | 261   | 3.73 | 2.64 | [ 0.43 , 4.85] | Inferior by $\geq 20\%$   | 0.019  |

**Supplemental table 8c: Difference in Kaplan-Meier failure estimate between a contemporary reference and implants with at least 250 at risk at 7 years since primary in males between 55 and 75 years**

| Stem/cup brand                                                | Number at risk | Cumulative failure (%) | Difference in failure (%) | 95% CI         | Equivalence status        | p-value |
|---------------------------------------------------------------|----------------|------------------------|---------------------------|----------------|---------------------------|---------|
| [CoP] Furlong HAC Stem CSF                                    | 1,463          | 1.34                   | [REFERENCE]               |                |                           |         |
| [CoC] ABG II Monolithic Cementless Stem ABG II Cementless Cup | 345            | 3.88                   | 2.53                      | [ 0.60 , 4.47] | Inferior by $\geq 20\%$   | 0.010   |
| [CoC] Accolade Trident                                        | 907            | 3.15                   | 1.81                      | [ 0.90 , 2.71] | Inferior by $\geq 20\%$   | <0.001  |
| [CoC] Corail Pinnacle                                         | 2,130          | 2.66                   | 1.32                      | [ 0.70 , 1.94] | Inferior by $\geq 20\%$   | <0.001  |
| [CoC] Exeter V40 Trident                                      | 1,626          | 2.00                   | 0.66                      | [-0.06 , 1.38] | Non-inferiority not shown | 0.074   |
| [CoC] Furlong HAC Stem CSF                                    | 415            | 4.02                   | 2.68                      | [ 0.84 , 4.53] | Inferior by $\geq 20\%$   | 0.004   |
| [CoC] Furlong HAC Stem Furlong HAC CSF Plus                   | 674            | 2.13                   | 0.79                      | [ 0.06 , 1.51] | Non-inferiority not shown | 0.034   |
| [CoC] SL-Plus Cementless Stem EP-Fit Plus                     | 322            | 6.44                   | 5.09                      | [ 2.69 , 7.50] | Inferior by $\geq 100\%$  | <0.001  |
| [CoC] Taperloc Cementless Stem Exceed ABT                     | 469            | 1.99                   | 0.65                      | [-0.20 , 1.49] | Non-inferiority not shown | 0.132   |
| [CoP] Corail Pinnacle                                         | 480            | 2.24                   | 0.90                      | [-0.00 , 1.80] | Non-inferiority not shown | 0.051   |
| [CoP] Exeter V40 Exeter Contemporary Flanged                  | 335            | 0.88                   | -0.46                     | [-1.19 , 0.27] | Non-inferiority not shown | 0.218   |
| [CoP] Exeter V40 Trident                                      | 362            | 1.17                   | -0.17                     | [-0.95 , 0.61] | Non-inferiority not shown | 0.668   |
| [CoP] Exeter V40 Trilogy                                      | 350            | 1.92                   | 0.57                      | [-0.62 , 1.77] | Non-inferiority not shown | 0.347   |
| [MoP] Accolade Trident                                        | 787            | 3.94                   | 2.60                      | [ 1.64 , 3.55] | Inferior by $\geq 100\%$  | <0.001  |
| [MoP] C-Stem Cemented Stem Charnley and Elite Plus LPW        | 272            | 1.16                   | -0.18                     | [-1.42 , 1.07] | Non-inferiority not shown | 0.779   |
| [MoP] C-Stem Cemented Stem Elite Plus Ogee                    | 494            | 1.45                   | 0.11                      | [-0.84 , 1.06] | Non-inferiority not shown | 0.818   |
| [MoP] CPT Elite Plus Ogee                                     | 325            | 2.35                   | 1.01                      | [-0.37 , 2.38] | Non-inferiority not shown | 0.151   |
| [MoP] CPT Trilogy                                             | 815            | 2.41                   | 1.06                      | [ 0.21 , 1.92] | Non-inferiority not shown | 0.015   |
| [MoP] CPT ZCA                                                 | 599            | 2.69                   | 1.35                      | [ 0.23 , 2.46] | Non-inferiority not shown | 0.018   |
| [MoP] Charnley Cemented Stem Charnley Cemented Cup            | 813            | 3.75                   | 2.41                      | [ 1.14 , 3.68] | Inferior by $\geq 20\%$   | <0.001  |
| [MoP] Charnley Cemented Stem Charnley Ogee                    | 1,632          | 3.68                   | 2.34                      | [ 1.39 , 3.29] | Inferior by $\geq 100\%$  | <0.001  |
| [MoP] Charnley Cemented Stem Charnley and Elite Plus LPW      | 776            | 1.98                   | 0.64                      | [-0.37 , 1.64] | Non-inferiority not shown | 0.212   |
| [MoP] Corail Duraloc Cementless Cup                           | 750            | 3.84                   | 2.50                      | [ 1.18 , 3.82] | Inferior by $\geq 20\%$   | <0.001  |
| [MoP] Corail Pinnacle                                         | 2,172          | 2.41                   | 1.07                      | [ 0.44 , 1.70] | Inferior by $\geq 20\%$   | 0.001   |
| [MoP] Corail Trilogy                                          | 254            | 3.58                   | 2.24                      | [ 0.45 , 4.03] | Inferior by $\geq 20\%$   | 0.014   |
| [MoP] Exeter V40 Cenator Cemented Cup                         | 263            | 2.66                   | 1.32                      | [-0.40 , 3.04] | Non-inferiority not shown | 0.134   |
| [MoP] Exeter V40 Elite Plus Cemented Cup                      | 400            | 1.39                   | 0.05                      | [-0.92 , 1.02] | Non-inferiority not shown | 0.920   |
| [MoP] Exeter V40 Elite Plus Ogee                              | 1,861          | 1.79                   | 0.45                      | [-0.24 , 1.14] | Non-inferiority not shown | 0.203   |
| [MoP] Exeter V40 Exeter Contemporary Flanged                  | 3,658          | 2.15                   | 0.81                      | [ 0.21 , 1.42] | Non-inferiority not shown | 0.008   |
| [MoP] Exeter V40 Exeter Contemporary Hooded                   | 1,560          | 2.93                   | 1.58                      | [ 0.78 , 2.38] | Inferior by $\geq 20\%$   | <0.001  |
| [MoP] Exeter V40 Exeter Duration                              | 1,396          | 3.26                   | 1.92                      | [ 1.02 , 2.82] | Inferior by $\geq 20\%$   | <0.001  |
| [MoP] Exeter V40 Reflection Cementless                        | 339            | 2.55                   | 1.21                      | [-0.31 , 2.73] | Non-inferiority not shown | 0.117   |
| [MoP] Exeter V40 Trident                                      | 1,455          | 1.83                   | 0.48                      | [-0.16 , 1.12] | Non-inferiority not shown | 0.140   |
| [MoP] Exeter V40 Trilogy                                      | 1,299          | 1.71                   | 0.37                      | [-0.38 , 1.12] | Non-inferiority not shown | 0.332   |
| [MoP] Furlong HAC Stem CSF                                    | 1,139          | 2.72                   | 1.37                      | [ 0.45 , 2.30] | Inferior by $\geq 20\%$   | 0.004   |
| [MoP] Muller-Biomet Apollo                                    | 277            | 1.47                   | 0.13                      | [-1.07 , 1.32] | Non-inferiority not shown | 0.835   |
| [MoP] SL-Plus Cementless Stem EP-Fit Plus                     | 411            | 6.01                   | 4.67                      | [ 2.79 , 6.55] | Inferior by $\geq 100\%$  | <0.001  |
| [MoP] Stanmore Modular Stem Stanmore-Arcom Cup                | 312            | 2.00                   | 0.66                      | [-0.64 , 1.96] | Non-inferiority not shown | 0.320   |
| [MoP] Synergy Cementless Stem Reflection Cementless           | 298            | 2.71                   | 1.37                      | [-0.23 , 2.96] | Non-inferiority not shown | 0.093   |

1  
2  
3  
4  
5  
6  
7  
8  
9  
10  
11  
12  
13  
14  
15  
16  
17  
18  
19  
20  
21  
22  
23  
24  
25  
26  
27  
28  
29  
30  
31  
32  
33  
34  
35  
36  
37  
38  
39  
40  
41  
42  
43  
44  
45  
46

For peer review only



**Supplemental table 8d: Difference in Kaplan-Meier failure estimate between a contemporary reference and implants with at least 250 at risk at 10 years since primary in males between 55 and 75 years**

| Stem/cup brand                                                | Number at risk | Cumulative failure (%) | Difference in failure (%) | 95% CI          | Equivalence status        | p-value |
|---------------------------------------------------------------|----------------|------------------------|---------------------------|-----------------|---------------------------|---------|
| [MoP] Exeter V40 Exeter Contemporary Flanged                  | 1,182          | 3.08                   | [REFERENCE]               |                 |                           |         |
| [CoC] ABG II Monolithic Cementless Stem ABG II Cementless Cup | 257            | 5.45                   | 2.38                      | [ 0.02 , 4.73]  | Non-inferiority not shown | 0.048   |
| [CoC] Exeter V40 Trident                                      | 545            | 2.49                   | -0.59                     | [-1.46 , 0.27]  | Non-inferior              | 0.179   |
| [CoP] Furlong HAC Stem CSF                                    | 855            | 1.75                   | -1.32                     | [-2.14 , -0.51] | Non-inferior              | 0.001   |
| [MoP] C-Stem Cemented Stem Elite Plus Ogee                    | 254            | 2.48                   | -0.60                     | [-2.00 , 0.80]  | Non-inferiority not shown | 0.400   |
| [MoP] CPT Trilogy                                             | 302            | 3.83                   | 0.75                      | [-0.59 , 2.10]  | Non-inferiority not shown | 0.272   |
| [MoP] Charnley Cemented Stem Charnley Cemented Cup            | 486            | 5.76                   | 2.68                      | [ 1.04 , 4.31]  | Inferior by $\geq 20\%$   | 0.001   |
| [MoP] Charnley Cemented Stem Charnley Ogee                    | 910            | 5.47                   | 2.39                      | [ 1.21 , 3.58]  | Inferior by $\geq 20\%$   | <0.001  |
| [MoP] Charnley Cemented Stem Charnley and Elite Plus LPW      | 500            | 3.21                   | 0.13                      | [-1.19 , 1.45]  | Non-inferiority not shown | 0.846   |
| [MoP] Corail Duraloc Cementless Cup                           | 336            | 7.31                   | 4.23                      | [ 2.19 , 6.27]  | Inferior by $\geq 20\%$   | <0.001  |
| [MoP] Corail Pinnacle                                         | 545            | 3.39                   | 0.31                      | [-0.53 , 1.15]  | Non-inferiority not shown | 0.468   |
| [MoP] Exeter V40 Elite Plus Ogee                              | 805            | 2.81                   | -0.27                     | [-1.18 , 0.65]  | Non-inferiority not shown | 0.568   |
| [MoP] Exeter V40 Exeter Contemporary Hooded                   | 600            | 4.02                   | 0.94                      | [-0.09 , 1.98]  | Non-inferiority not shown | 0.074   |
| [MoP] Exeter V40 Exeter Duration                              | 642            | 5.21                   | 2.14                      | [ 0.92 , 3.35]  | Inferior by $\geq 20\%$   | 0.001   |
| [MoP] Exeter V40 Trident                                      | 335            | 2.78                   | -0.30                     | [-1.32 , 0.72]  | Non-inferiority not shown | 0.566   |
| [MoP] Exeter V40 Trilogy                                      | 482            | 3.05                   | -0.03                     | [-1.09 , 1.03]  | Non-inferiority not shown | 0.956   |
| [MoP] Furlong HAC Stem CSF                                    | 483            | 4.63                   | 1.55                      | [ 0.22 , 2.89]  | Non-inferiority not shown | 0.023   |

**Supplemental table 9a: Difference in Kaplan-Meier failure estimate between a contemporary reference and implants with at least 250 at risk at 3 years since primary in males >75 years**

| Stem/cup brand                                             | Number at risk | Cumulative failure (%) | Difference in failure (%) | 95% CI         | Equivalence status        | p-value |
|------------------------------------------------------------|----------------|------------------------|---------------------------|----------------|---------------------------|---------|
| [MoP] Exeter V40 Elite Plus Ogee                           | 2,199          | 0.78                   | [REFERENCE]               |                |                           |         |
| [CoC] Corail Pinnacle                                      | 540            | 2.35                   | 1.57                      | [ 0.38 , 2.76] | Inferior by $\geq 20\%$   | 0.010   |
| [CoC] Furlong HAC Stem Furlong HAC CSF Plus                | 350            | 2.46                   | 1.68                      | [ 0.26 , 3.10] | Inferior by $\geq 20\%$   | 0.020   |
| [CoP] Corail Pinnacle                                      | 306            | 1.43                   | 0.65                      | [-0.25 , 1.56] | Non-inferiority not shown | 0.159   |
| [CoP] Furlong HAC Stem CSF                                 | 326            | 1.19                   | 0.41                      | [-0.68 , 1.51] | Non-inferiority not shown | 0.456   |
| [MoP] Accolade Trident                                     | 911            | 2.78                   | 2.00                      | [ 1.01 , 3.00] | Inferior by $\geq 100\%$  | <0.001  |
| [MoP] C-Stem AMT Cemented Stem Charnley and Elite Plus LPW | 293            | 1.38                   | 0.60                      | [-0.65 , 1.85] | Non-inferiority not shown | 0.347   |
| [MoP] C-Stem AMT Cemented Stem Elite Plus Ogee             | 265            | 0.56                   | -0.22                     | [-1.07 , 0.63] | Non-inferiority not shown | 0.618   |
| [MoP] C-Stem Cemented Stem Elite Plus Ogee                 | 365            | 1.07                   | 0.29                      | [-0.70 , 1.28] | Non-inferiority not shown | 0.563   |
| [MoP] CPT Elite Plus Ogee                                  | 287            | 2.08                   | 1.30                      | [-0.26 , 2.87] | Non-inferiority not shown | 0.103   |
| [MoP] CPT Trilogy                                          | 894            | 1.93                   | 1.15                      | [ 0.34 , 1.97] | Inferior by $\geq 20\%$   | 0.005   |
| [MoP] CPT ZCA                                              | 1,080          | 1.70                   | 0.93                      | [ 0.22 , 1.63] | Inferior by $\geq 20\%$   | 0.010   |
| [MoP] Charnley Cemented Stem Charnley Cemented Cup         | 398            | 0.92                   | 0.14                      | [-0.82 , 1.10] | Non-inferiority not shown | 0.771   |
| [MoP] Charnley Cemented Stem Charnley Ogee                 | 959            | 1.32                   | 0.54                      | [-0.20 , 1.28] | Non-inferiority not shown | 0.154   |
| [MoP] Charnley Cemented Stem Charnley and Elite Plus LPW   | 559            | 1.07                   | 0.29                      | [-0.56 , 1.14] | Non-inferiority not shown | 0.507   |
| [MoP] Corail Duraloc Cementless Cup                        | 280            | 0.64                   | -0.14                     | [-1.08 , 0.81] | Non-inferiority not shown | 0.780   |
| [MoP] Corail Marathon                                      | 317            | 1.78                   | 1.00                      | [-0.14 , 2.14] | Non-inferiority not shown | 0.084   |
| [MoP] Corail Pinnacle                                      | 2,860          | 1.59                   | 0.81                      | [ 0.33 , 1.30] | Inferior by $\geq 20\%$   | 0.001   |
| [MoP] Exeter V40 Cenator Cemented Cup                      | 301            | 1.13                   | 0.35                      | [-0.80 , 1.51] | Non-inferiority not shown | 0.547   |
| [MoP] Exeter V40 Charnley and Elite Plus LPW               | 263            | 0.27                   | -0.51                     | [-1.13 , 0.12] | Non-inferior              | 0.113   |
| [MoP] Exeter V40 Elite Plus Cemented Cup                   | 394            | 0.78                   | 0.00                      | [-0.83 , 0.84] | Non-inferiority not shown | 0.994   |
| [MoP] Exeter V40 Exeter Contemporary Flanged               | 5,295          | 1.03                   | 0.25                      | [-0.15 , 0.65] | Non-inferiority not shown | 0.221   |
| [MoP] Exeter V40 Exeter Contemporary Hooded                | 2,098          | 1.84                   | 1.06                      | [ 0.48 , 1.64] | Inferior by $\geq 20\%$   | <0.001  |
| [MoP] Exeter V40 Exeter Duration                           | 1,426          | 1.51                   | 0.73                      | [ 0.08 , 1.39] | Non-inferiority not shown | 0.028   |
| [MoP] Exeter V40 Exeter X3 Rimfit                          | 537            | 1.21                   | 0.43                      | [-0.28 , 1.13] | Non-inferiority not shown | 0.237   |
| [MoP] Exeter V40 Opera                                     | 290            | 1.47                   | 0.69                      | [-0.63 , 2.01] | Non-inferiority not shown | 0.306   |
| [MoP] Exeter V40 Pinnacle                                  | 288            | 1.15                   | 0.37                      | [-0.62 , 1.36] | Non-inferiority not shown | 0.460   |
| [MoP] Exeter V40 Reflection Cementless                     | 256            | 2.46                   | 1.68                      | [-0.15 , 3.51] | Non-inferiority not shown | 0.072   |
| [MoP] Exeter V40 Trident                                   | 2,148          | 1.41                   | 0.63                      | [ 0.11 , 1.15] | Non-inferiority not shown | 0.018   |
| [MoP] Exeter V40 Trilogy                                   | 867            | 1.15                   | 0.37                      | [-0.36 , 1.10] | Non-inferiority not shown | 0.319   |
| [MoP] Furlong HAC Stem CSF                                 | 770            | 1.99                   | 1.21                      | [ 0.27 , 2.16] | Inferior by $\geq 20\%$   | 0.012   |
| [MoP] Furlong HAC Stem Furlong HAC CSF Plus                | 449            | 3.06                   | 2.28                      | [ 1.00 , 3.56] | Inferior by $\geq 100\%$  | <0.001  |
| [MoP] Muller-Biomet Apollo                                 | 276            | 0.96                   | 0.18                      | [-0.95 , 1.31] | Non-inferiority not shown | 0.755   |
| [MoP] Stanmore Modular Stem Stanmore-Arcom Cup             | 510            | 1.01                   | 0.23                      | [-0.64 , 1.09] | Non-inferiority not shown | 0.610   |
| [MoP] Taperloc Cementless Stem Exceed ABT                  | 421            | 1.75                   | 0.97                      | [ 0.01 , 1.94] | Non-inferiority not shown | 0.049   |

**Supplemental table 9b: Difference in Kaplan-Meier failure estimate between a contemporary reference and implants with at least 250 at risk at 5 years since primary in males >75 years**

| Stem/cup brand                                           | Number at risk | Cumulative failure (%) | Difference in failure (%) | 95% CI         | Equivalence status        | p-value |
|----------------------------------------------------------|----------------|------------------------|---------------------------|----------------|---------------------------|---------|
| [MoP] Exeter V40 Elite Plus Ogee                         | 1,490          | 1.10                   | [REFERENCE]               |                |                           |         |
| [CoC] Corail Pinnacle                                    | 321            | 2.82                   | 1.73                      | [ 0.35 , 3.11] | Inferior by $\geq 20\%$   | 0.014   |
| [MoP] Accolade Trident                                   | 540            | 3.41                   | 2.32                      | [ 1.12 , 3.51] | Inferior by $\geq 100\%$  | <0.001  |
| [MoP] C-Stem Cemented Stem Elite Plus Ogee               | 253            | 1.45                   | 0.36                      | [-0.91 , 1.62] | Non-inferiority not shown | 0.579   |
| [MoP] CPT Trilogy                                        | 535            | 2.58                   | 1.48                      | [ 0.46 , 2.50] | Inferior by $\geq 20\%$   | 0.004   |
| [MoP] CPT ZCA                                            | 693            | 2.90                   | 1.80                      | [ 0.78 , 2.83] | Inferior by $\geq 20\%$   | 0.001   |
| [MoP] Charnley Cemented Stem Charnley Cemented Cup       | 325            | 0.92                   | -0.17                     | [-1.16 , 0.82] | Non-inferiority not shown | 0.731   |
| [MoP] Charnley Cemented Stem Charnley Ogee               | 760            | 1.91                   | 0.81                      | [-0.12 , 1.75] | Non-inferiority not shown | 0.088   |
| [MoP] Charnley Cemented Stem Charnley and Elite Plus LPW | 446            | 1.43                   | 0.33                      | [-0.68 , 1.35] | Non-inferiority not shown | 0.521   |
| [MoP] Corail Pinnacle                                    | 1,479          | 1.98                   | 0.88                      | [ 0.27 , 1.49] | Inferior by $\geq 20\%$   | 0.005   |
| [MoP] Exeter V40 Elite Plus Cemented Cup                 | 271            | 1.04                   | -0.06                     | [-1.06 , 0.95] | Non-inferiority not shown | 0.910   |
| [MoP] Exeter V40 Exeter Contemporary Flanged             | 3,050          | 1.33                   | 0.24                      | [-0.26 , 0.74] | Non-inferiority not shown | 0.350   |
| [MoP] Exeter V40 Exeter Contemporary Hooded              | 1,283          | 2.09                   | 1.00                      | [ 0.32 , 1.68] | Inferior by $\geq 20\%$   | 0.004   |
| [MoP] Exeter V40 Exeter Duration                         | 1,041          | 2.08                   | 0.98                      | [ 0.17 , 1.80] | Non-inferiority not shown | 0.018   |
| [MoP] Exeter V40 Trident                                 | 1,100          | 1.57                   | 0.48                      | [-0.13 , 1.09] | Non-inferiority not shown | 0.125   |
| [MoP] Exeter V40 Trilogy                                 | 592            | 2.07                   | 0.97                      | [-0.05 , 1.99] | Non-inferiority not shown | 0.063   |
| [MoP] Furlong HAC Stem CSF                               | 561            | 2.27                   | 1.17                      | [ 0.12 , 2.22] | Non-inferiority not shown | 0.029   |
| [MoP] Stanmore Modular Stem Stanmore-Arcom Cup           | 358            | 1.20                   | 0.11                      | [-0.88 , 1.09] | Non-inferiority not shown | 0.834   |

**Supplemental table 9c: Difference in Kaplan-Meier failure estimate between a contemporary reference and implants with at least 250 at risk at 7 years since primary in males >75 years**

| Stem/cup brand                                           | Number at risk | Cumulative failure (%) | Difference in failure (%) | 95% CI         | Equivalence status        | p-value |
|----------------------------------------------------------|----------------|------------------------|---------------------------|----------------|---------------------------|---------|
| [MoP] Exeter V40 Exeter Contemporary Flanged             | 1,540          | 1.76                   | [REFERENCE]               |                |                           |         |
| [MoP] CPT Trilogy                                        | 264            | 3.16                   | 1.40                      | [ 0.20 , 2.60] | Non-inferiority not shown | 0.022   |
| [MoP] CPT ZCA                                            | 390            | 3.94                   | 2.18                      | [ 0.82 , 3.55] | Inferior by $\geq 20\%$   | 0.002   |
| [MoP] Charnley Cemented Stem Charnley Cemented Cup       | 252            | 1.25                   | -0.51                     | [-1.68 , 0.66] | Non-inferiority not shown | 0.393   |
| [MoP] Charnley Cemented Stem Charnley Ogee               | 502            | 2.56                   | 0.80                      | [-0.32 , 1.92] | Non-inferiority not shown | 0.162   |
| [MoP] Charnley Cemented Stem Charnley and Elite Plus LPW | 308            | 1.43                   | -0.33                     | [-1.34 , 0.68] | Non-inferiority not shown | 0.520   |
| [MoP] Corail Pinnacle                                    | 542            | 2.34                   | 0.58                      | [-0.14 , 1.30] | Non-inferiority not shown | 0.116   |
| [MoP] Exeter V40 Elite Plus Ogee                         | 868            | 1.43                   | -0.33                     | [-0.99 , 0.32] | Non-inferior              | 0.315   |
| [MoP] Exeter V40 Exeter Contemporary Hooded              | 670            | 2.53                   | 0.77                      | [-0.02 , 1.57] | Non-inferiority not shown | 0.056   |
| [MoP] Exeter V40 Exeter Duration                         | 643            | 3.08                   | 1.32                      | [ 0.29 , 2.36] | Non-inferiority not shown | 0.012   |
| [MoP] Exeter V40 Trident                                 | 538            | 2.35                   | 0.59                      | [-0.28 , 1.46] | Non-inferiority not shown | 0.185   |
| [MoP] Exeter V40 Trilogy                                 | 321            | 2.07                   | 0.31                      | [-0.71 , 1.32] | Non-inferiority not shown | 0.553   |
| [MoP] Furlong HAC Stem CSF                               | 358            | 3.06                   | 1.30                      | [ 0.01 , 2.60] | Non-inferiority not shown | 0.049   |

**Supplemental table 10a: Total number of implants at risk at each time-point by age-group and gender in implants with at least 500**

|               | Time since primary procedure |         |         |          |
|---------------|------------------------------|---------|---------|----------|
|               | 3 years                      | 5 years | 7 years | 10 years |
| Male, <55     | 7,977                        | 3,749   | No data | No data  |
| Male, 55-75   | 79,299                       | 49,540  | 27,512  | 6,584    |
| Male, 75+     | 23,653                       | 13,124  | 5,303   | No data  |
| Total Male    | 132,073                      | 82,003  | 42,294  | 10,348   |
| Female, <55   | 10,007                       | 6,016   | 2,303   | No data  |
| Female, 55-75 | 136,561                      | 91,874  | 52,940  | 15,848   |
| Female, 75+   | 64,959                       | 37,694  | 19,779  | No data  |
| Total Female  | 244,285                      | 156,505 | 91,701  | 24,408   |
| Total         | 415,608                      | 268,809 | 156,138 | 41,908   |

**Supplemental table 10b: Total number of implant failures at each time-point by age-group and gender in implants with at least 500 at risk**

|               | Time since primary procedure |         |         |          |
|---------------|------------------------------|---------|---------|----------|
|               | 3 years                      | 5 years | 7 years | 10 years |
| Male, <55     | 260                          | 132     | 68      | 53       |
| Male, 55-75   | 1,039                        | 533     | 364     | 442      |
| Male, 75+     | 293                          | 133     | 86      | 57       |
| Total Male    | 1,618                        | 811     | 529     | 560      |
| Female, <55   | 268                          | 141     | 102     | 79       |
| Female, 55-75 | 1,344                        | 784     | 539     | 545      |
| Female, 75+   | 458                          | 255     | 161     | 120      |
| Total Female  | 2,091                        | 1,189   | 820     | 754      |
| Total         | 3,733                        | 2,009   | 1,359   | 1,325    |

1  
2  
3  
4  
5  
6  
7  
8  
9  
10  
11  
12  
13  
14  
15  
16  
17  
18  
19  
20  
21  
22  
23  
24  
25  
26  
27  
28  
29  
30  
31  
32  
33  
34  
35  
36  
37  
38  
39  
40  
41  
42  
43  
44  
45  
46  
47

**The RECORD statement – checklist of items, extended from the STROBE statement, that should be reported in observational studies using routinely collected health data.**

|                           | Item No. | STROBE items                                                                                                                                                                               | Location in manuscript where items are reported | RECORD items                                                                                                                                                                                                                                                                                                                                                                                                                                | Location in manuscript where items are reported           |
|---------------------------|----------|--------------------------------------------------------------------------------------------------------------------------------------------------------------------------------------------|-------------------------------------------------|---------------------------------------------------------------------------------------------------------------------------------------------------------------------------------------------------------------------------------------------------------------------------------------------------------------------------------------------------------------------------------------------------------------------------------------------|-----------------------------------------------------------|
| <b>Title and abstract</b> |          |                                                                                                                                                                                            |                                                 |                                                                                                                                                                                                                                                                                                                                                                                                                                             |                                                           |
|                           | 1        | (a) Indicate the study’s design with a commonly used term in the title or the abstract (b) Provide in the abstract an informative and balanced summary of what was done and what was found | Title page 1, abstract page 2.                  | RECORD 1.1: The type of data used should be specified in the title or abstract. When possible, the name of the databases used should be included.<br><br>RECORD 1.2: If applicable, the geographic region and timeframe within which the study took place should be reported in the title or abstract.<br><br>RECORD 1.3: If linkage between databases was conducted for the study, this should be clearly stated in the title or abstract. | Title, abstract page 2.<br><br>Abstract page 2<br><br>N/A |
| <b>Introduction</b>       |          |                                                                                                                                                                                            |                                                 |                                                                                                                                                                                                                                                                                                                                                                                                                                             |                                                           |
| Background rationale      | 2        | Explain the scientific background and rationale for the investigation being reported                                                                                                       | Introduction Page 4                             |                                                                                                                                                                                                                                                                                                                                                                                                                                             |                                                           |
| Objectives                | 3        | State specific objectives, including any prespecified hypotheses                                                                                                                           | Introduction Page 5                             |                                                                                                                                                                                                                                                                                                                                                                                                                                             |                                                           |
| <b>Methods</b>            |          |                                                                                                                                                                                            |                                                 |                                                                                                                                                                                                                                                                                                                                                                                                                                             |                                                           |
| Study Design              | 4        | Present key elements of study design early in the paper                                                                                                                                    | Methods pages 7 to 8                            |                                                                                                                                                                                                                                                                                                                                                                                                                                             |                                                           |
| Setting                   | 5        | Describe the setting, locations, and relevant dates, including periods of recruitment, exposure, follow-up, and data collection                                                            | Methods page 6 and 7                            |                                                                                                                                                                                                                                                                                                                                                                                                                                             |                                                           |
| Participants              | 6        | (a) <i>Cohort study</i> - Give the eligibility criteria, and the sources and methods of selection of participants. Describe methods of follow-up                                           | Methods page 6                                  | RECORD 6.1: The methods of study population selection (such as codes or algorithms used to identify subjects) should be listed in detail. If this is not possible, an                                                                                                                                                                                                                                                                       | Methods Page 6, supplemental figure 1                     |

|                              |    |                                                                                                                                                                                                                                                                                                                                                                                                                                                                                                                                                                      |                       |                                                                                                                                                                                                                                                                                                                                                                                                                                                                                                                                |                                                          |
|------------------------------|----|----------------------------------------------------------------------------------------------------------------------------------------------------------------------------------------------------------------------------------------------------------------------------------------------------------------------------------------------------------------------------------------------------------------------------------------------------------------------------------------------------------------------------------------------------------------------|-----------------------|--------------------------------------------------------------------------------------------------------------------------------------------------------------------------------------------------------------------------------------------------------------------------------------------------------------------------------------------------------------------------------------------------------------------------------------------------------------------------------------------------------------------------------|----------------------------------------------------------|
|                              |    | <p><i>Case-control study</i> - Give the eligibility criteria, and the sources and methods of case ascertainment and control selection. Give the rationale for the choice of cases and controls</p> <p><i>Cross-sectional study</i> - Give the eligibility criteria, and the sources and methods of selection of participants</p> <p>(b) <i>Cohort study</i> - For matched studies, give matching criteria and number of exposed and unexposed</p> <p><i>Case-control study</i> - For matched studies, give matching criteria and the number of controls per case</p> |                       | <p>explanation should be provided.</p> <p>RECORD 6.2: Any validation studies of the codes or algorithms used to select the population should be referenced. If validation was conducted for this study and not published elsewhere, detailed methods and results should be provided.</p> <p>RECORD 6.3: If the study involved linkage of databases, consider use of a flow diagram or other graphical display to demonstrate the data linkage process, including the number of individuals with linked data at each stage.</p> | <p>N/A</p> <p>N/A</p>                                    |
| Variables                    | 7  | Clearly define all outcomes, exposures, predictors, potential confounders, and effect modifiers. Give diagnostic criteria, if applicable.                                                                                                                                                                                                                                                                                                                                                                                                                            | Methods page 6 and 7  | RECORD 7.1: A complete list of codes and algorithms used to classify exposures, outcomes, confounders, and effect modifiers should be provided. If these cannot be reported, an explanation should be provided.                                                                                                                                                                                                                                                                                                                | Methods page 6 (description of data selection, no codes) |
| Data sources/<br>measurement | 8  | For each variable of interest, give sources of data and details of methods of assessment (measurement). Describe comparability of assessment methods if there is more than one group                                                                                                                                                                                                                                                                                                                                                                                 | Methods Page 6        |                                                                                                                                                                                                                                                                                                                                                                                                                                                                                                                                |                                                          |
| Bias                         | 9  | Describe any efforts to address potential sources of bias                                                                                                                                                                                                                                                                                                                                                                                                                                                                                                            |                       |                                                                                                                                                                                                                                                                                                                                                                                                                                                                                                                                |                                                          |
| Study size                   | 10 | Explain how the study size was arrived at                                                                                                                                                                                                                                                                                                                                                                                                                                                                                                                            | Supplemental figure 1 |                                                                                                                                                                                                                                                                                                                                                                                                                                                                                                                                |                                                          |
| Quantitative variables       | 11 | Explain how quantitative variables were handled in the analyses. If applicable, describe which groupings were chosen, and why                                                                                                                                                                                                                                                                                                                                                                                                                                        | Methods Page 6 and 7  |                                                                                                                                                                                                                                                                                                                                                                                                                                                                                                                                |                                                          |
| Statistical methods          | 12 | (a) Describe all statistical methods, including those used to control for confounding<br>(b) Describe any methods used to                                                                                                                                                                                                                                                                                                                                                                                                                                            | Methods Page 6 and 7  |                                                                                                                                                                                                                                                                                                                                                                                                                                                                                                                                |                                                          |



1  
2  
3  
4  
5  
6  
7  
8  
9  
10  
11  
12  
13  
14  
15  
16  
17  
18  
19  
20  
21  
22  
23  
24  
25  
26  
27  
28  
29  
30  
31  
32  
33  
34  
35  
36  
37  
38  
39  
40  
41  
42  
43  
44  
45  
46  
47

|                                  |    |                                                                                                                                                                                                                                                                                                                                                                                                                                                                       |                                          |                                                                                                                                                                                                                                                                                                                         |                                                                              |
|----------------------------------|----|-----------------------------------------------------------------------------------------------------------------------------------------------------------------------------------------------------------------------------------------------------------------------------------------------------------------------------------------------------------------------------------------------------------------------------------------------------------------------|------------------------------------------|-------------------------------------------------------------------------------------------------------------------------------------------------------------------------------------------------------------------------------------------------------------------------------------------------------------------------|------------------------------------------------------------------------------|
|                                  |    | <p>examine subgroups and interactions</p> <p>(c) Explain how missing data were addressed</p> <p>(d) <i>Cohort study</i> - If applicable, explain how loss to follow-up was addressed</p> <p><i>Case-control study</i> - If applicable, explain how matching of cases and controls was addressed</p> <p><i>Cross-sectional study</i> - If applicable, describe analytical methods taking account of sampling strategy</p> <p>(e) Describe any sensitivity analyses</p> |                                          |                                                                                                                                                                                                                                                                                                                         |                                                                              |
| Data access and cleaning methods |    | ..                                                                                                                                                                                                                                                                                                                                                                                                                                                                    |                                          | <p>RECORD 12.1: Authors should describe the extent to which the investigators had access to the database population used to create the study population.</p> <p>RECORD 12.2: Authors should provide information on the data cleaning methods used in the study.</p>                                                     | <p>Acknowledgement section; contributions, page 15</p> <p>Methods Page 6</p> |
| Linkage                          |    | ..                                                                                                                                                                                                                                                                                                                                                                                                                                                                    |                                          | <p>RECORD 12.3: State whether the study included person-level, institutional-level, or other data linkage across two or more databases. The methods of linkage and methods of linkage quality evaluation should be provided.</p>                                                                                        | No linkage                                                                   |
| <b>Results</b>                   |    |                                                                                                                                                                                                                                                                                                                                                                                                                                                                       |                                          |                                                                                                                                                                                                                                                                                                                         |                                                                              |
| Participants                     | 13 | <p>(a) Report the numbers of individuals at each stage of the study (<i>e.g.</i>, numbers potentially eligible, examined for eligibility, confirmed eligible, included in the study, completing follow-up, and analysed)</p> <p>(b) Give reasons for non-participation</p>                                                                                                                                                                                            | Supplemental figure 1 and Results page 8 | <p>RECORD 13.1: Describe in detail the selection of the persons included in the study (<i>i.e.</i>, study population selection) including filtering based on data quality, data availability and linkage. The selection of included persons can be described in the text and/or by means of the study flow diagram.</p> | <p>Methods, page 6; Results page 8 and supplemental figure 1</p>             |

|                   |    |                                                                                                                                                                                                                                                                                                                                                                                                                 |                                                        |  |  |
|-------------------|----|-----------------------------------------------------------------------------------------------------------------------------------------------------------------------------------------------------------------------------------------------------------------------------------------------------------------------------------------------------------------------------------------------------------------|--------------------------------------------------------|--|--|
|                   |    | at each stage.<br>(c) Consider use of a flow diagram                                                                                                                                                                                                                                                                                                                                                            |                                                        |  |  |
| Descriptive data  | 14 | (a) Give characteristics of study participants (e.g., demographic, clinical, social) and information on exposures and potential confounders<br>(b) Indicate the number of participants with missing data for each variable of interest<br>(c) <i>Cohort study</i> - summarise follow-up time (e.g., average and total amount)                                                                                   |                                                        |  |  |
| Outcome data      | 15 | <i>Cohort study</i> - Report numbers of outcome events or summary measures over time<br><i>Case-control study</i> - Report numbers in each exposure category, or summary measures of exposure<br><i>Cross-sectional study</i> - Report numbers of outcome events or summary measures                                                                                                                            | All supplemental tables; supplemental tables 10a and b |  |  |
| Main results      | 16 | (a) Give unadjusted estimates and, if applicable, confounder-adjusted estimates and their precision (e.g., 95% confidence interval). Make clear which confounders were adjusted for and why they were included<br>(b) Report category boundaries when continuous variables were categorized<br>(c) If relevant, consider translating estimates of relative risk into absolute risk for a meaningful time period | Results Pages 8 to 11, Supplemental tables             |  |  |
| Other analyses    | 17 | Report other analyses done—e.g., analyses of subgroups and interactions, and sensitivity analyses                                                                                                                                                                                                                                                                                                               | Results Page 11                                        |  |  |
| <b>Discussion</b> |    |                                                                                                                                                                                                                                                                                                                                                                                                                 |                                                        |  |  |
| Key results       | 18 | Summarise key results with reference to study objectives                                                                                                                                                                                                                                                                                                                                                        | Discussion Page 12                                     |  |  |

1  
2  
3  
4  
5  
6  
7  
8  
9  
10  
11  
12  
13  
14  
15  
16  
17  
18  
19  
20  
21  
22  
23  
24  
25  
26  
27  
28  
29  
30  
31  
32  
33  
34  
35  
36  
37  
38  
39  
40  
41  
42  
43  
44  
45  
46  
47

|                                                           |    |                                                                                                                                                                            |                        |                                                                                                                                                                                                                                                                                                          |                           |
|-----------------------------------------------------------|----|----------------------------------------------------------------------------------------------------------------------------------------------------------------------------|------------------------|----------------------------------------------------------------------------------------------------------------------------------------------------------------------------------------------------------------------------------------------------------------------------------------------------------|---------------------------|
| Limitations                                               | 19 | Discuss limitations of the study, taking into account sources of potential bias or imprecision. Discuss both direction and magnitude of any potential bias                 | Discussion Pages 13    | RECORD 19.1: Discuss the implications of using data that were not created or collected to answer the specific research question(s). Include discussion of misclassification bias, unmeasured confounding, missing data, and changing eligibility over time, as they pertain to the study being reported. | Discussion Pages 12 to 13 |
| Interpretation                                            | 20 | Give a cautious overall interpretation of results considering objectives, limitations, multiplicity of analyses, results from similar studies, and other relevant evidence | Discussion Pages 11-13 |                                                                                                                                                                                                                                                                                                          |                           |
| Generalisability                                          | 21 | Discuss the generalisability (external validity) of the study results                                                                                                      | Discussion Page 14     |                                                                                                                                                                                                                                                                                                          |                           |
| <b>Other Information</b>                                  |    |                                                                                                                                                                            |                        |                                                                                                                                                                                                                                                                                                          |                           |
| Funding                                                   | 22 | Give the source of funding and the role of the funders for the present study and, if applicable, for the original study on which the present article is based              | Page 1 and page 15     |                                                                                                                                                                                                                                                                                                          |                           |
| Accessibility of protocol, raw data, and programming code |    | ..                                                                                                                                                                         | N/A                    | RECORD 22.1: Authors should provide information on how to access any supplemental information such as the study protocol, raw data, or programming code.                                                                                                                                                 | N/A                       |
