# Supplementary material for: Assessing the non-inferiority of prosthesis constructs used in hip replacement using data from the National Joint Registry of England, Wales, Northern Ireland and the Isle of Man: a benchmarking study
Source: PubMed Central journal article supplement (PMC6502009; doi:10.1136/bmjopen-2018-026685), 2019-04-29
Supplement: bmjopen-2018-026685supp001.pdf [file bmjopen-2018-026685supp001.pdf]

Supplementary Figure 1: Flow diagram of showing derivation of procedures used in analyses

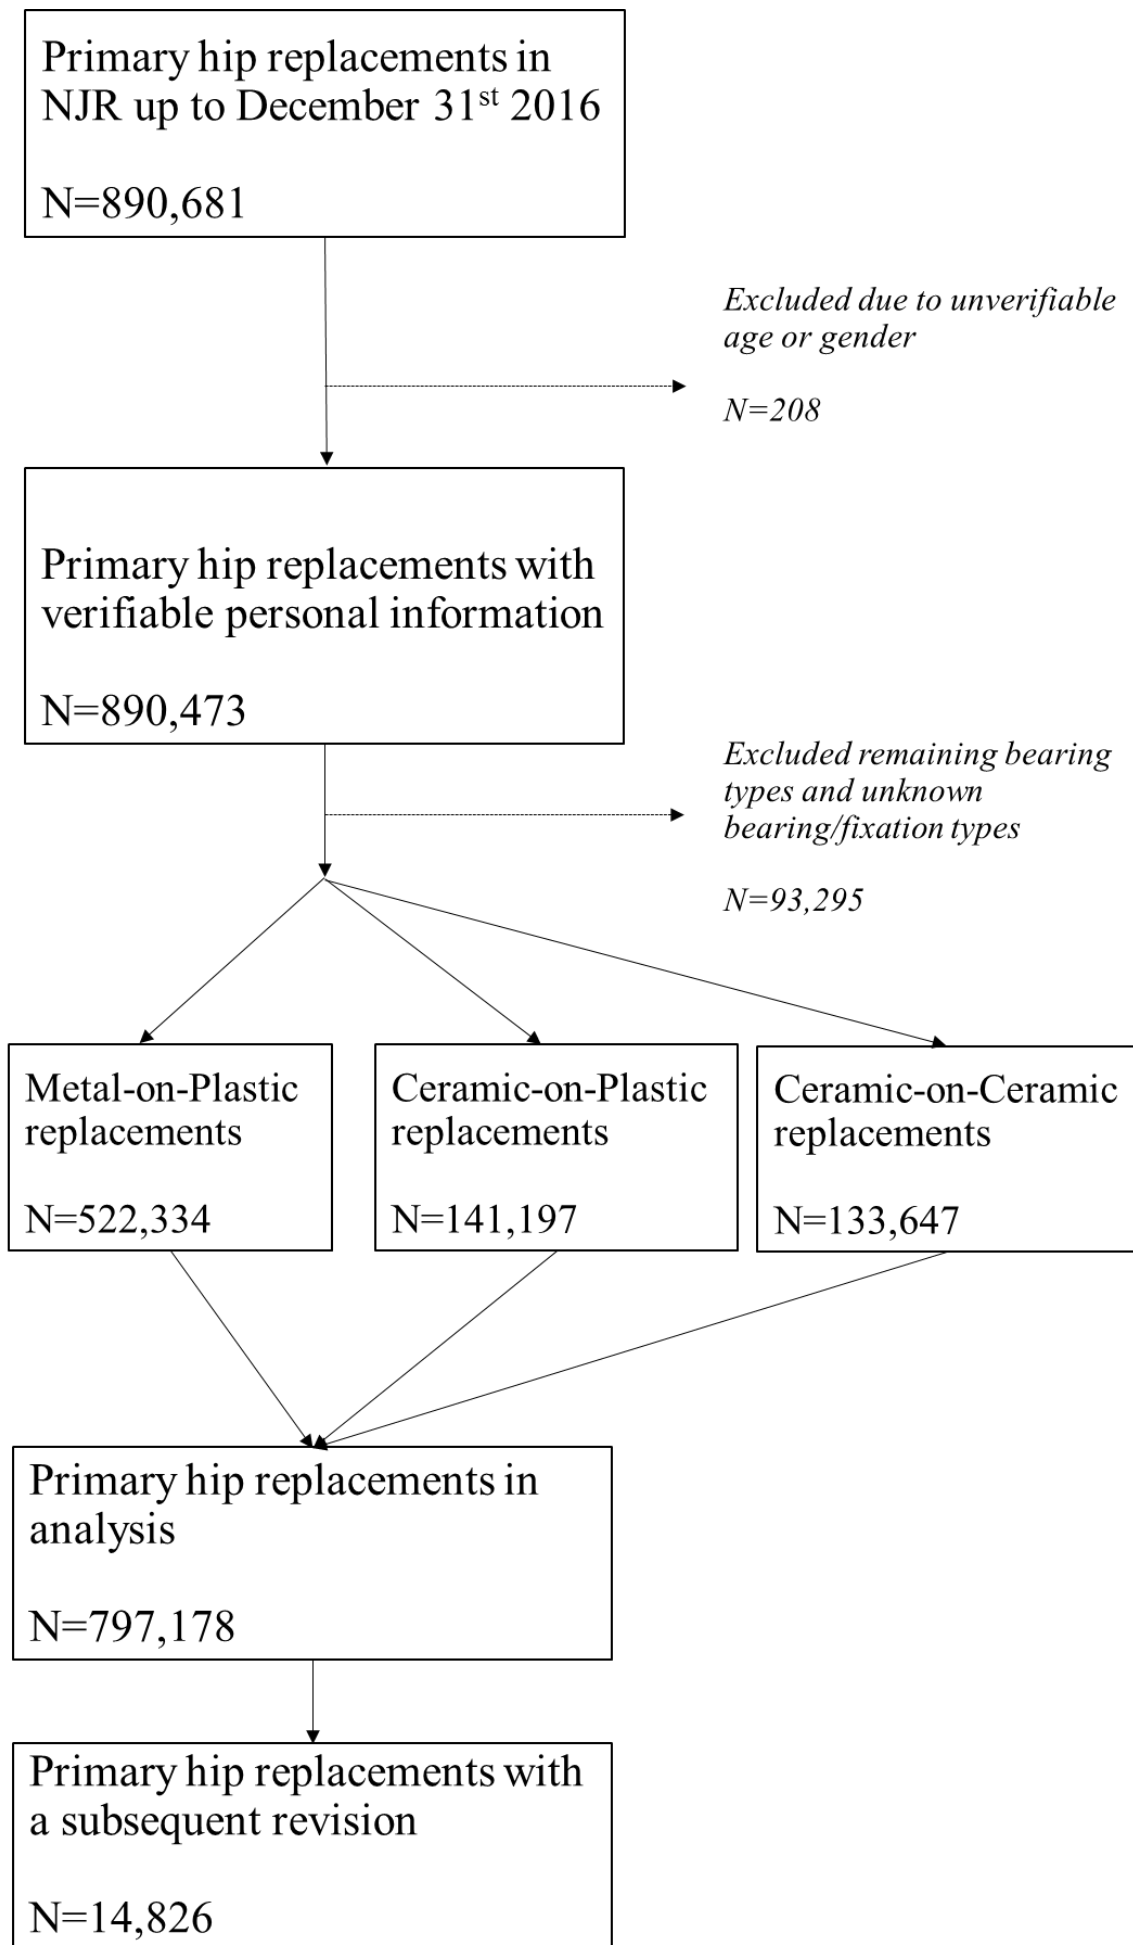

**Supplementary Figure 2a: Difference in failure of implanted constructs compared to a contemporary reference at 3 years in men, using all stem-cup combinations with  $\geq 500$  procedures remaining at risk**

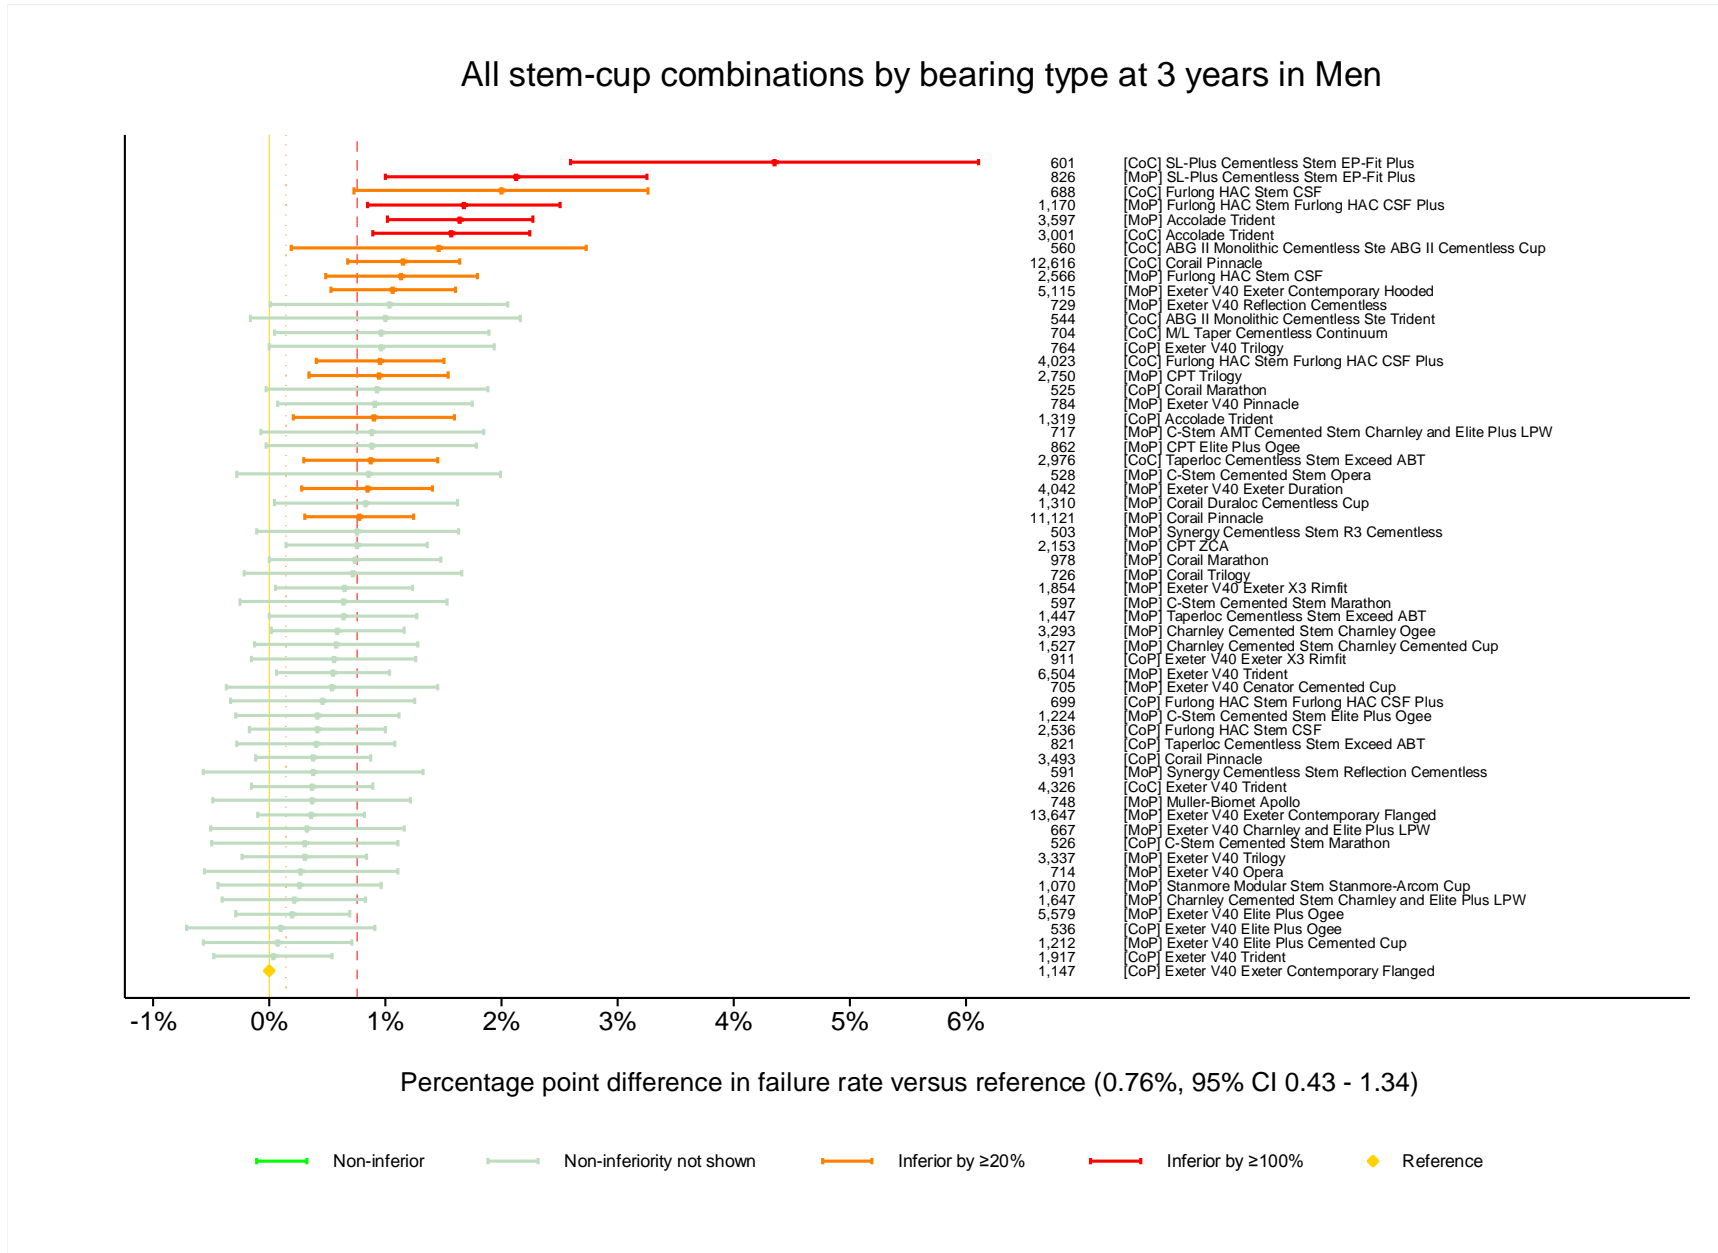

**Supplementary Figure 2b: Difference in failure of implanted constructs compared to a contemporary reference at 3 years in men less than 55 years, using all stem-cup combinations with  $\geq 500$  procedures remaining at risk**

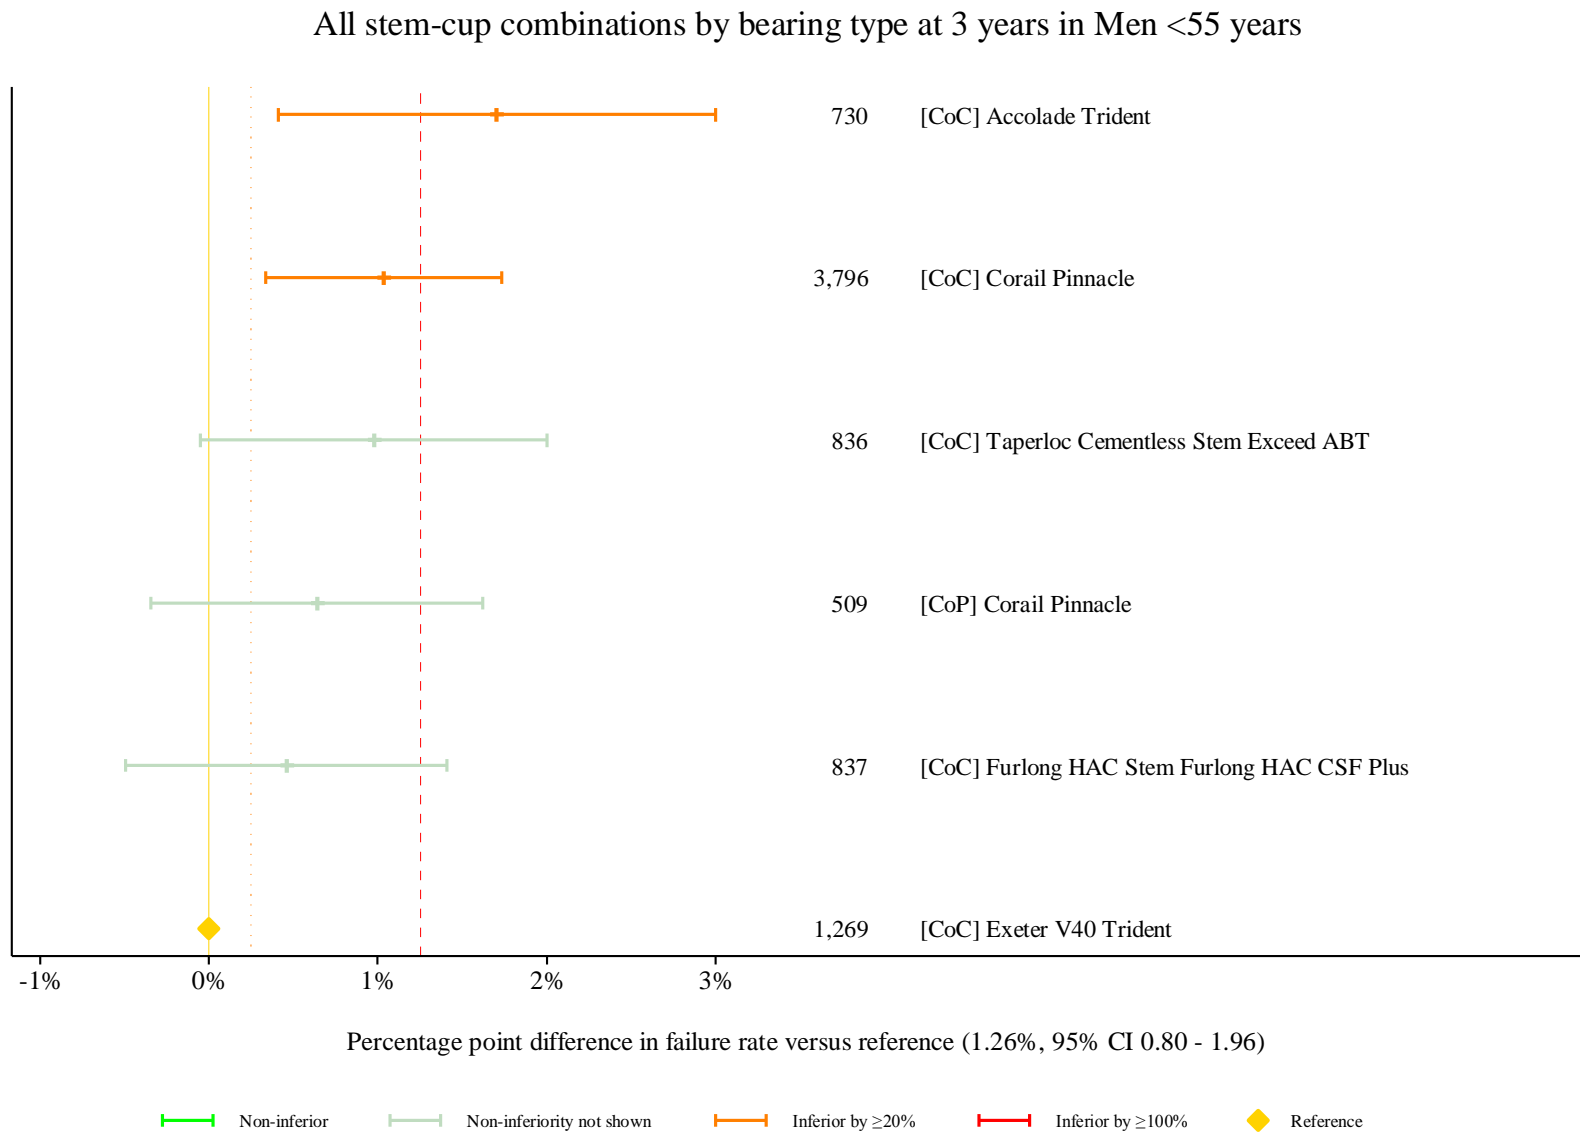

**Supplementary Figure 2c: Difference in failure of implanted constructs compared to a contemporary reference at 3 years in men between 55 and 75 years, using all stem-cup combinations with  $\geq 500$  procedures remaining at risk**

All stem-cup combinations by bearing type at 3 years in Men 55-75 years

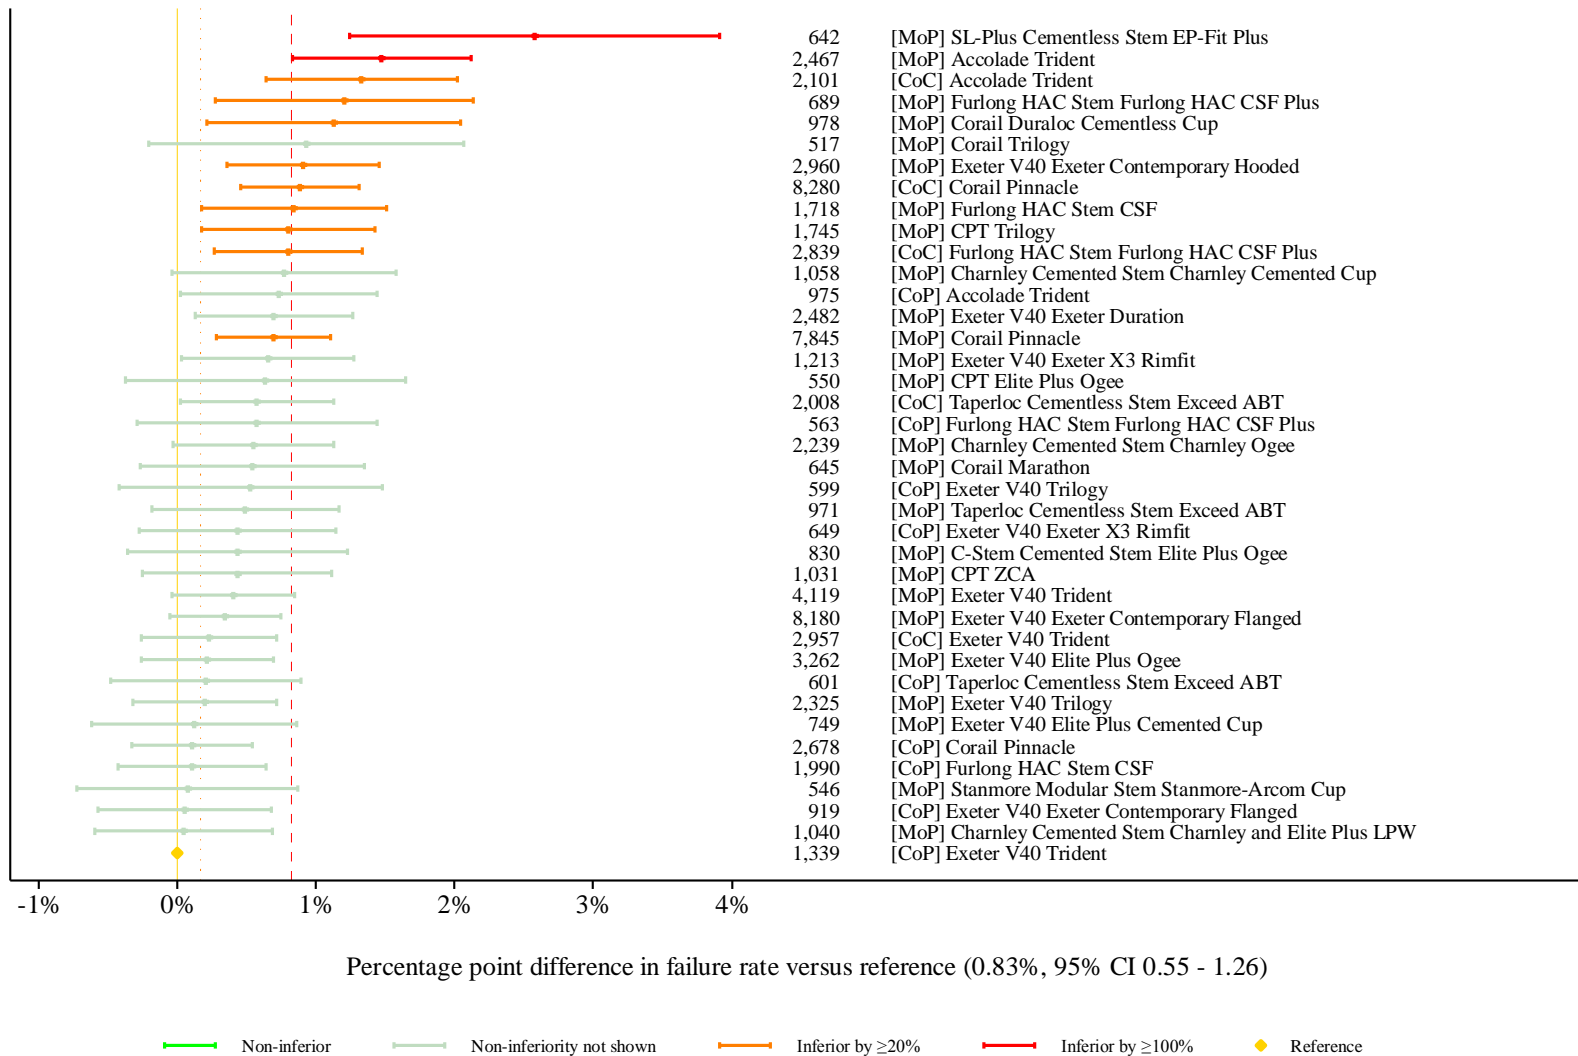

**Supplementary Figure 2d: Difference in failure of implanted constructs compared to a contemporary reference at 3 years in men greater than 75 years, using all stem-cup combinations with  $\geq 500$  procedures remaining at risk**

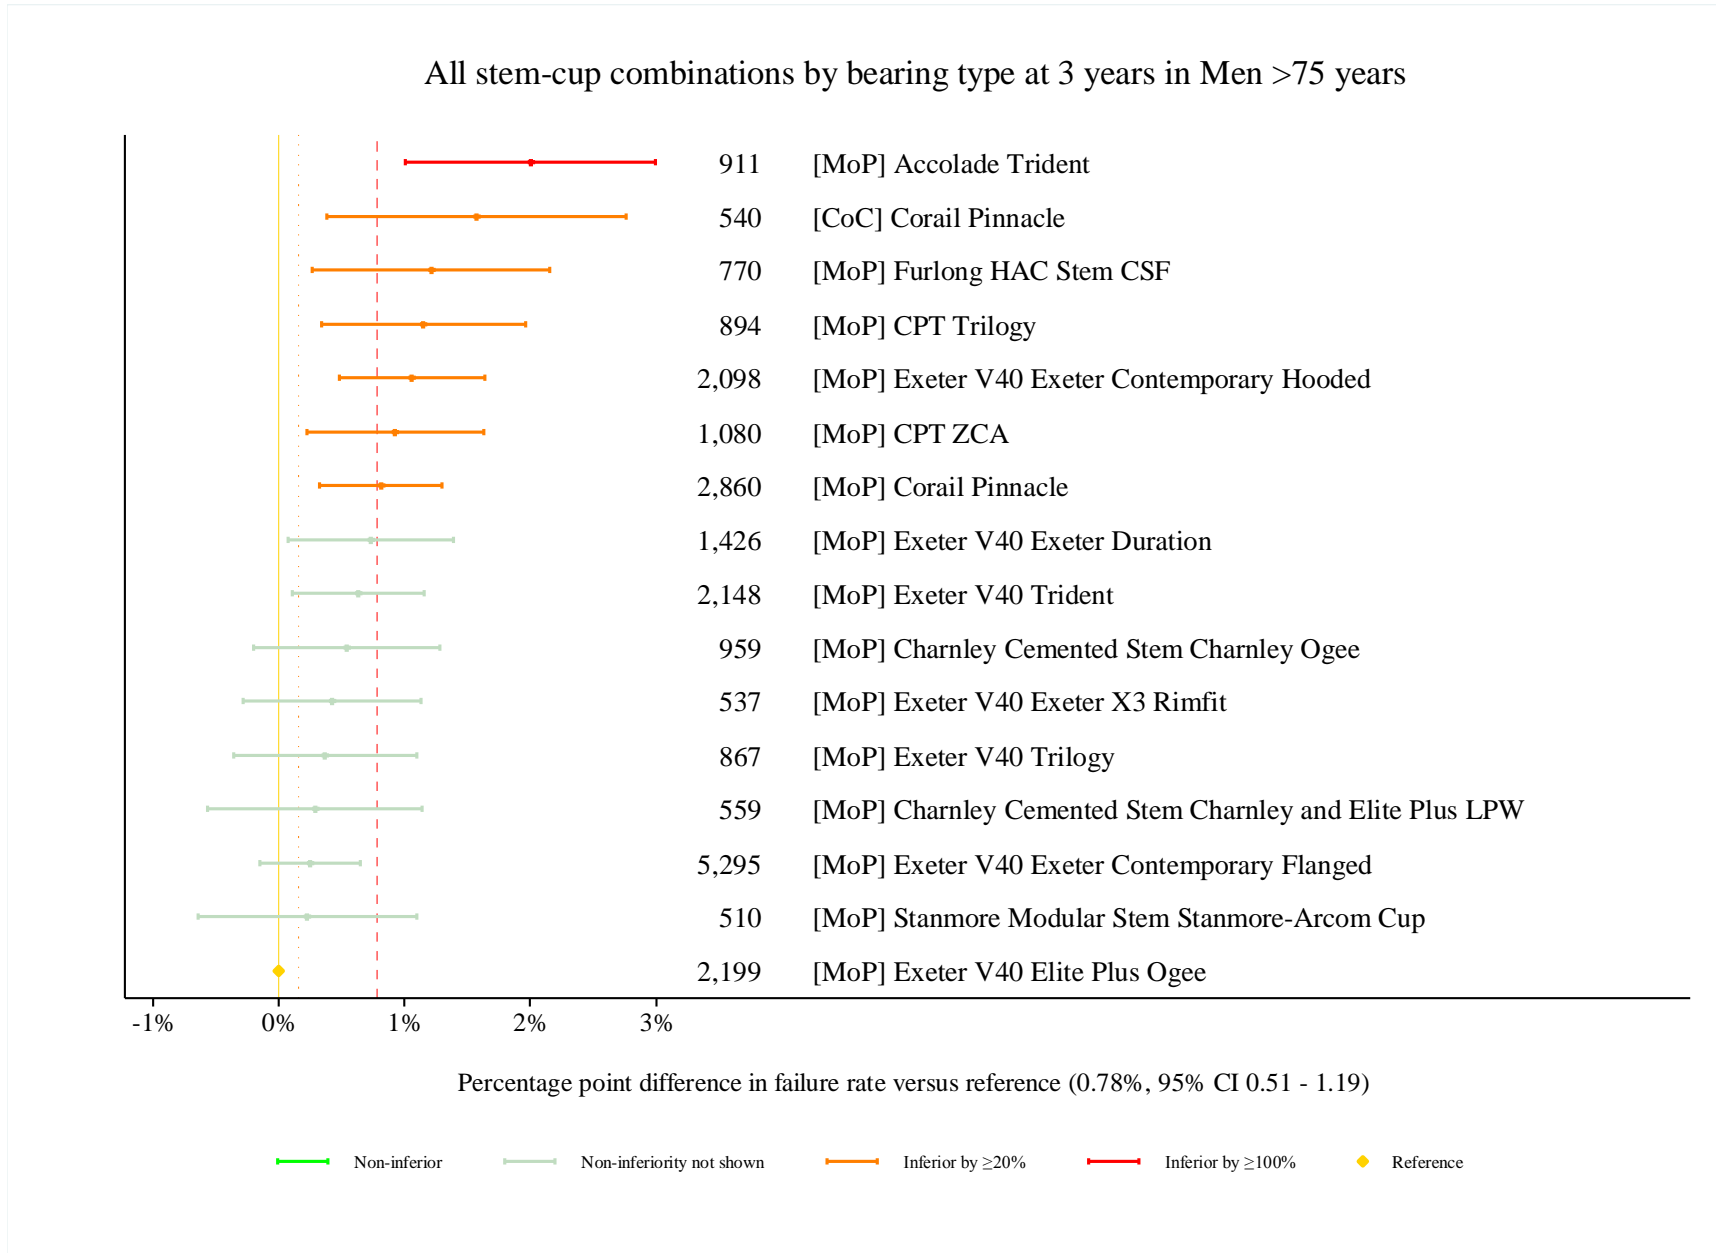

**Supplementary Figure 3a: Difference in failure of implanted constructs compared to a contemporary reference at 5 years in men, using all stem-cup combinations with  $\geq 500$  procedures remaining at risk**

All stem-cup combinations by bearing type at 5 years in Men

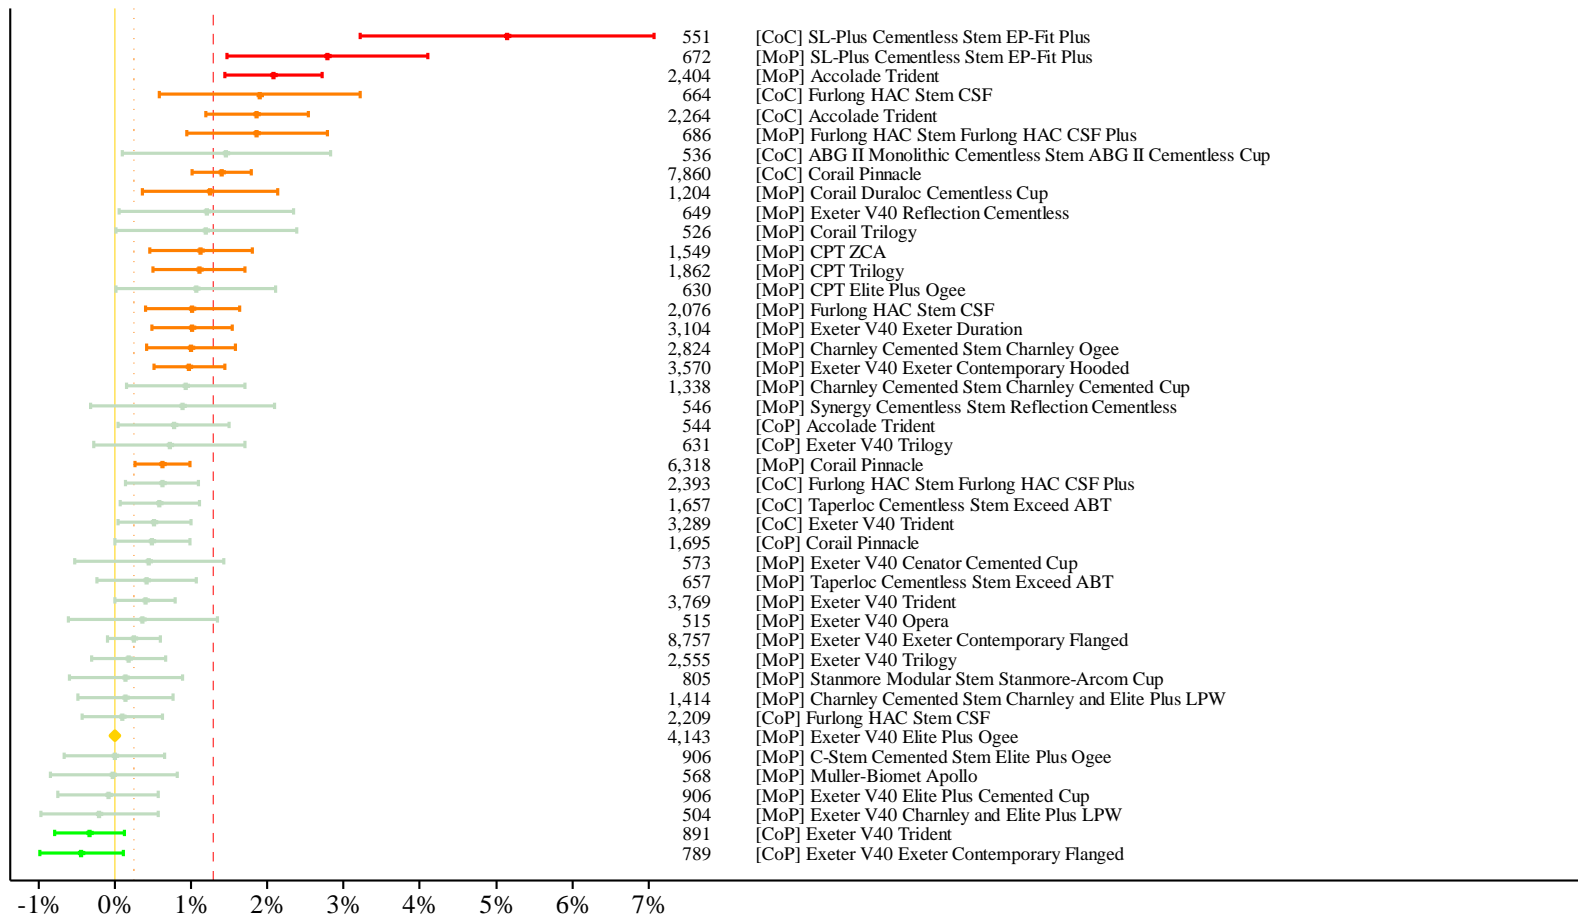

Percentage point difference in failure rate versus reference (1.29%, 95% CI 1.03 - 1.60)

— Non-inferior    
 — Non-inferiority not shown    
 — Inferior by  $\geq 20\%$     
 — Inferior by  $\geq 100\%$     
 ◆ Reference

Supplementary Figure 3b: Difference in failure of implanted constructs compared to a contemporary reference at 5 years in men less than 55 years, using all stem-cup combinations with  $\geq 500$  procedures remaining at risk

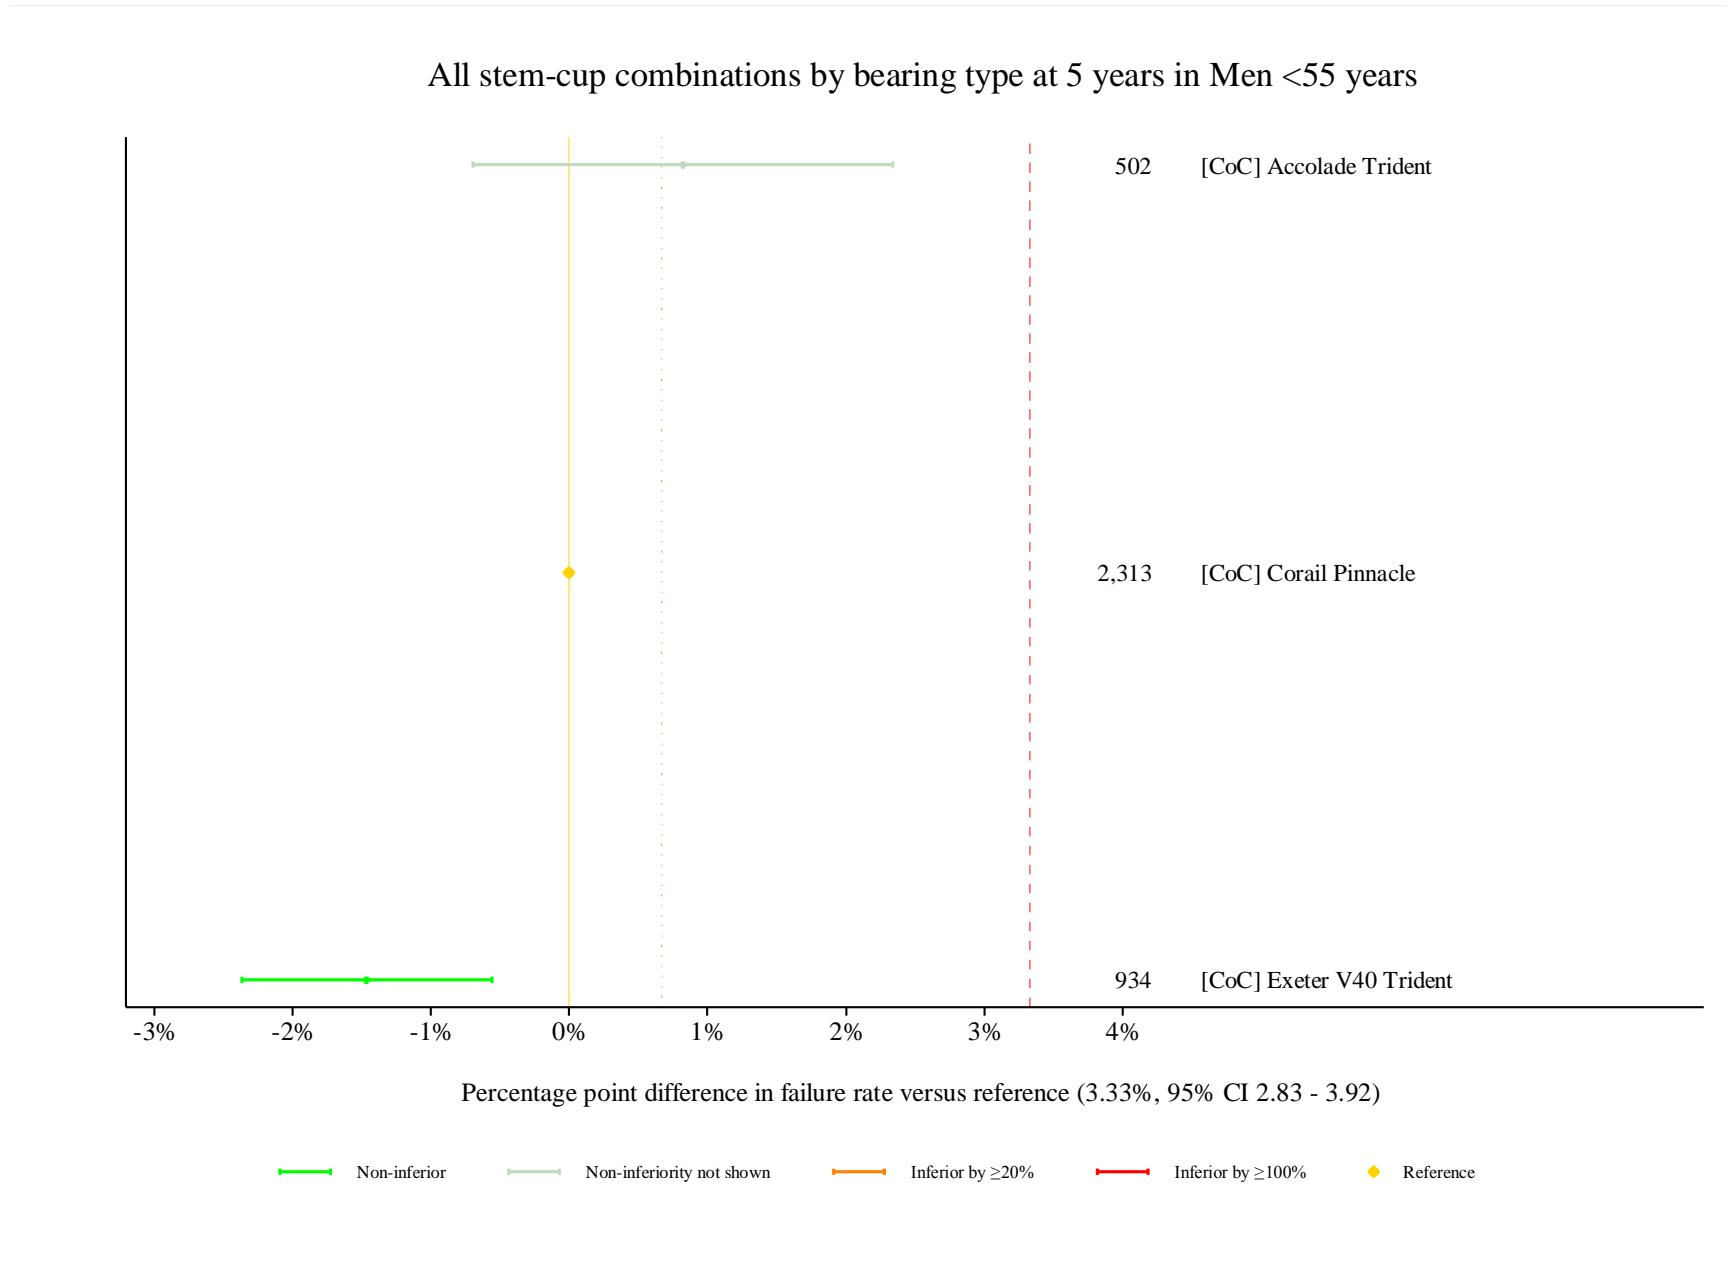

**Supplementary Figure 3c: Difference in failure of implanted constructs compared to a contemporary reference at 5 years in men between 55 and 75 years, using all stem-cup combinations with  $\geq 500$  procedures remaining at risk**

All stem-cup combinations by bearing type at 5 years in Men 55-75 years

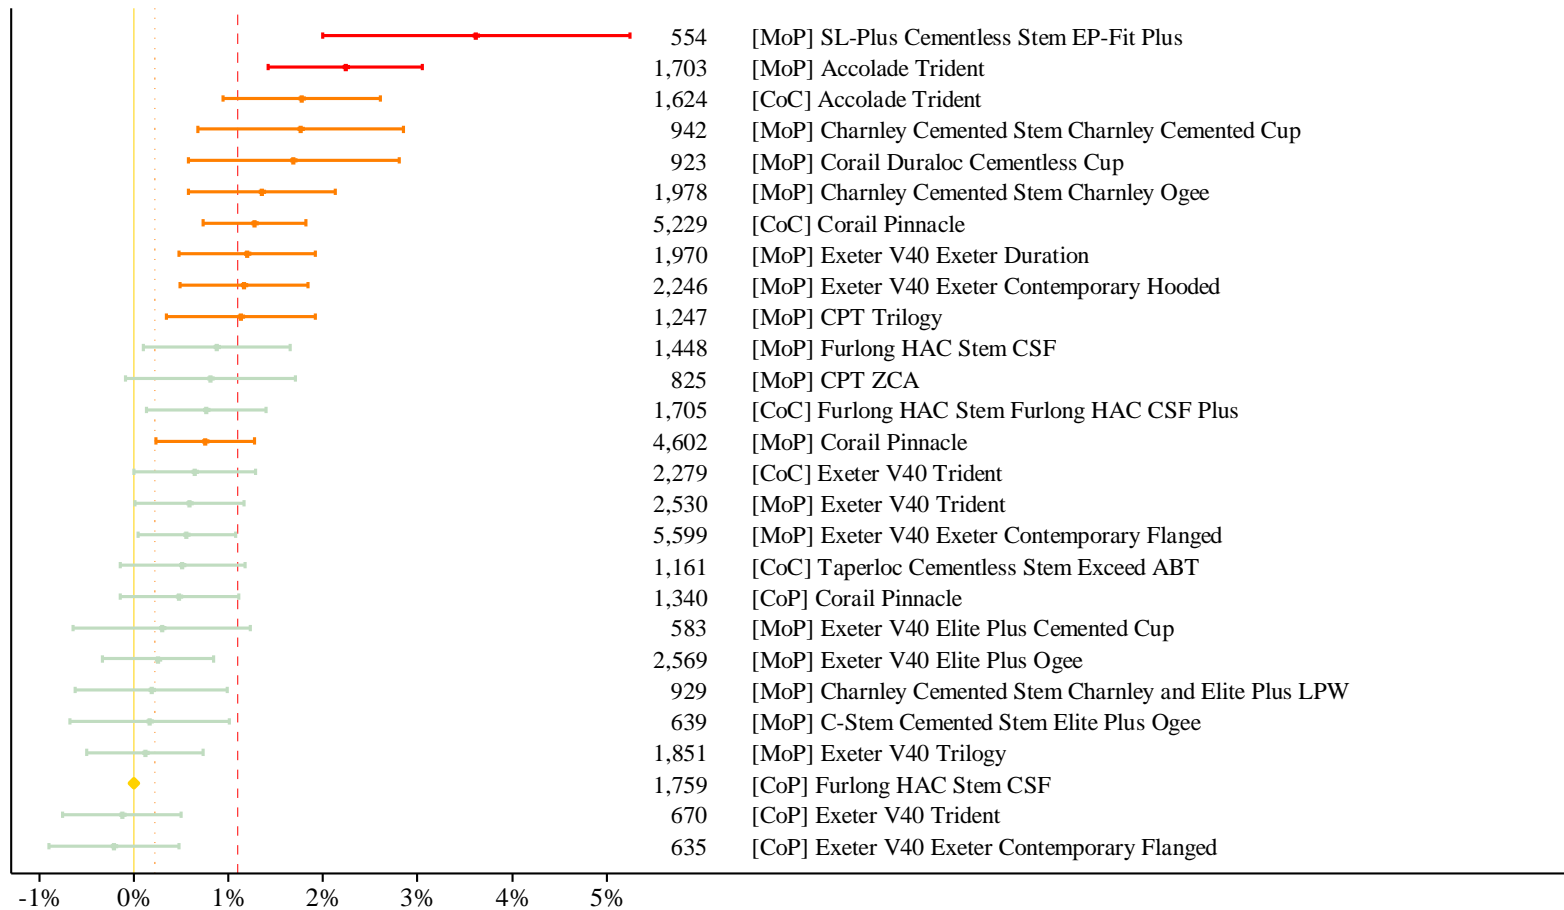

Percentage point difference in failure rate versus reference (1.09%, 95% CI 0.73 - 1.64)

— Non-inferior    
 — Non-inferiority not shown    
 — Inferior by  $\geq 20\%$     
 — Inferior by  $\geq 100\%$     
 ◆ Reference



**Supplementary Figure 3d: Difference in failure of implanted constructs compared to a contemporary reference at 5 years in men greater than 75 years, using all stem-cup combinations with  $\geq 500$  procedures remaining at risk**

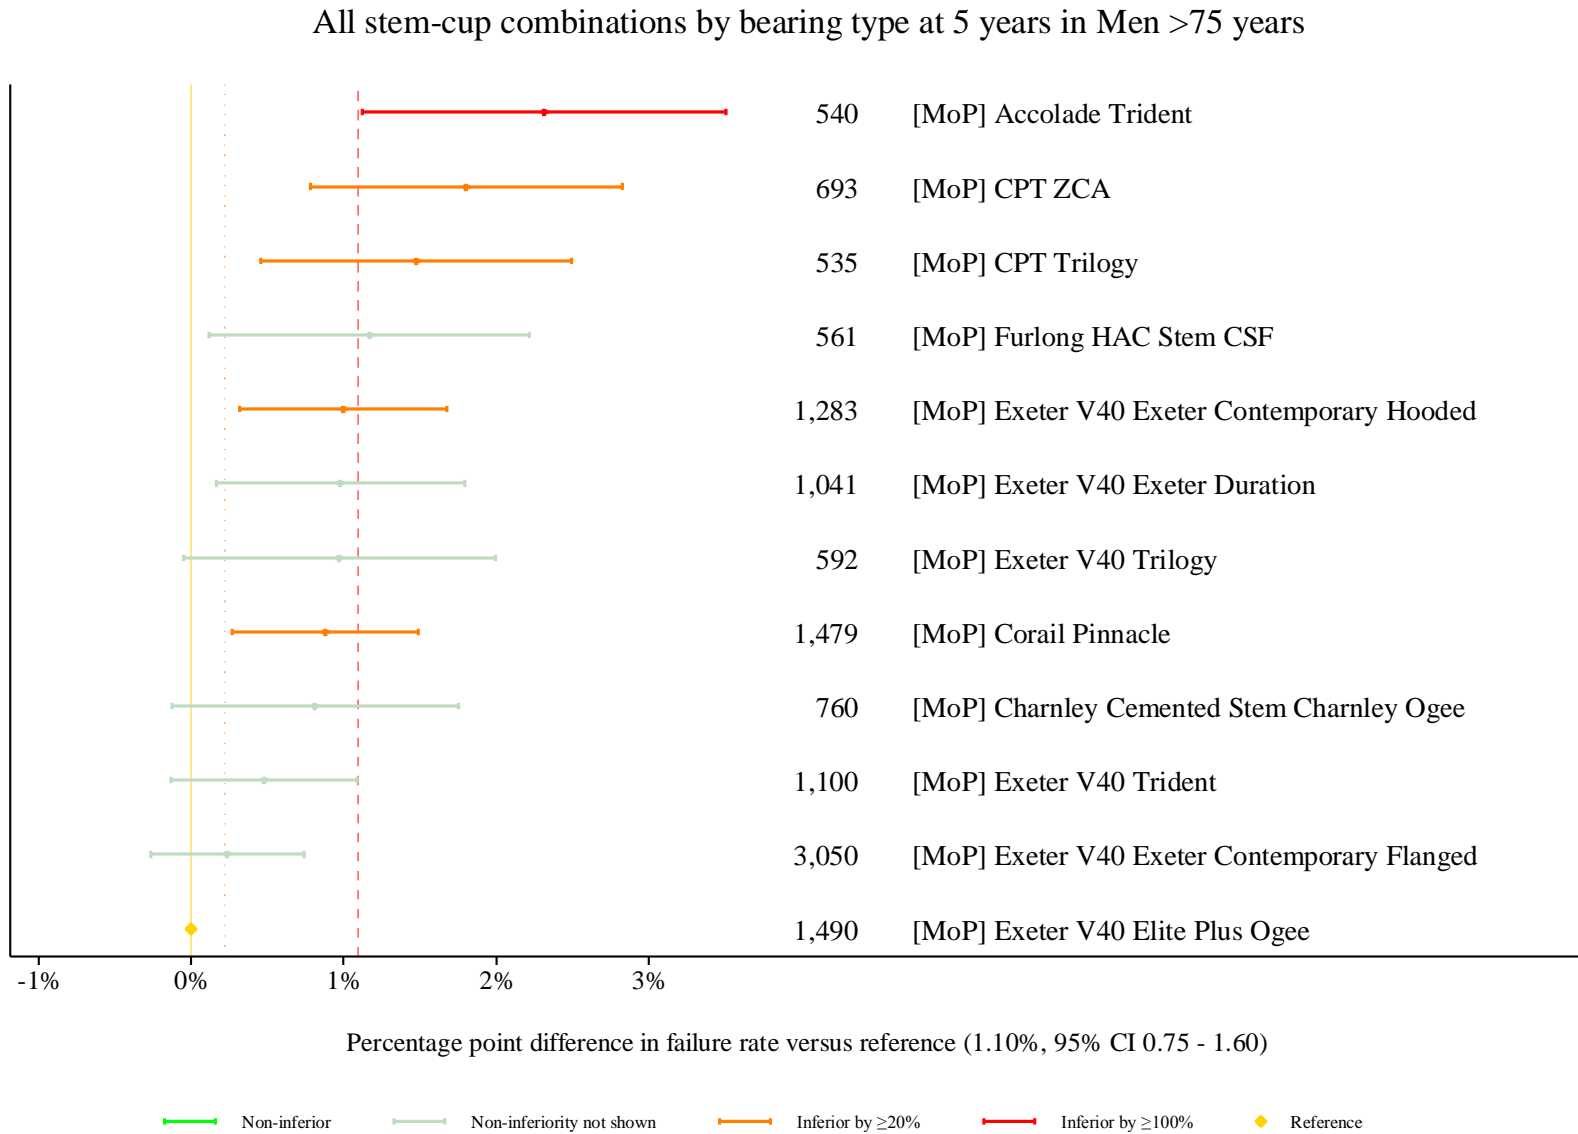

**Supplementary Figure 4a: Difference in failure of implanted constructs compared to a contemporary reference at 7 years in men, using all stem-cup combinations with  $\geq 500$  procedures remaining at risk**

All stem-cup combinations by bearing type at 7 years in Men

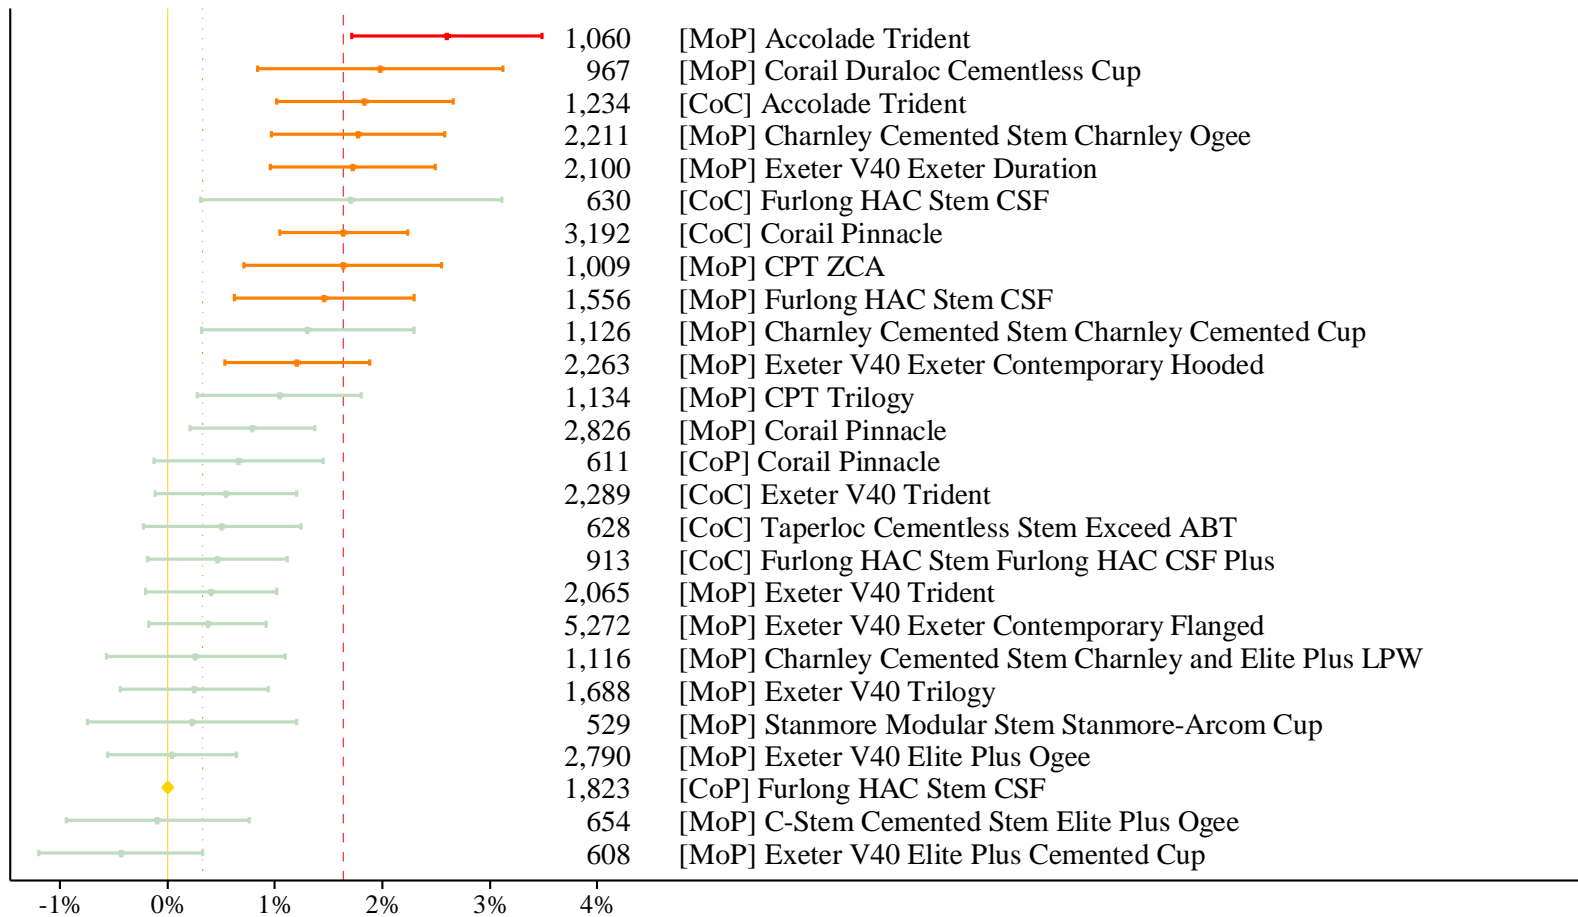

Percentage point difference in failure rate versus reference (1.64%, 95% CI 1.21 - 2.20)

— Non-inferior    
 — Non-inferiority not shown    
 — Inferior by  $\geq 20\%$     
 — Inferior by  $\geq 100\%$     
 ◆ Reference

**Supplementary Figure 4b: Difference in failure of implanted constructs compared to a contemporary reference at 7 years in men between 55 and 75 years, using all stem-cup combinations with  $\geq 500$  procedures remaining at risk**

All stem-cup combinations by bearing type at 7 years in Men 55-75 years

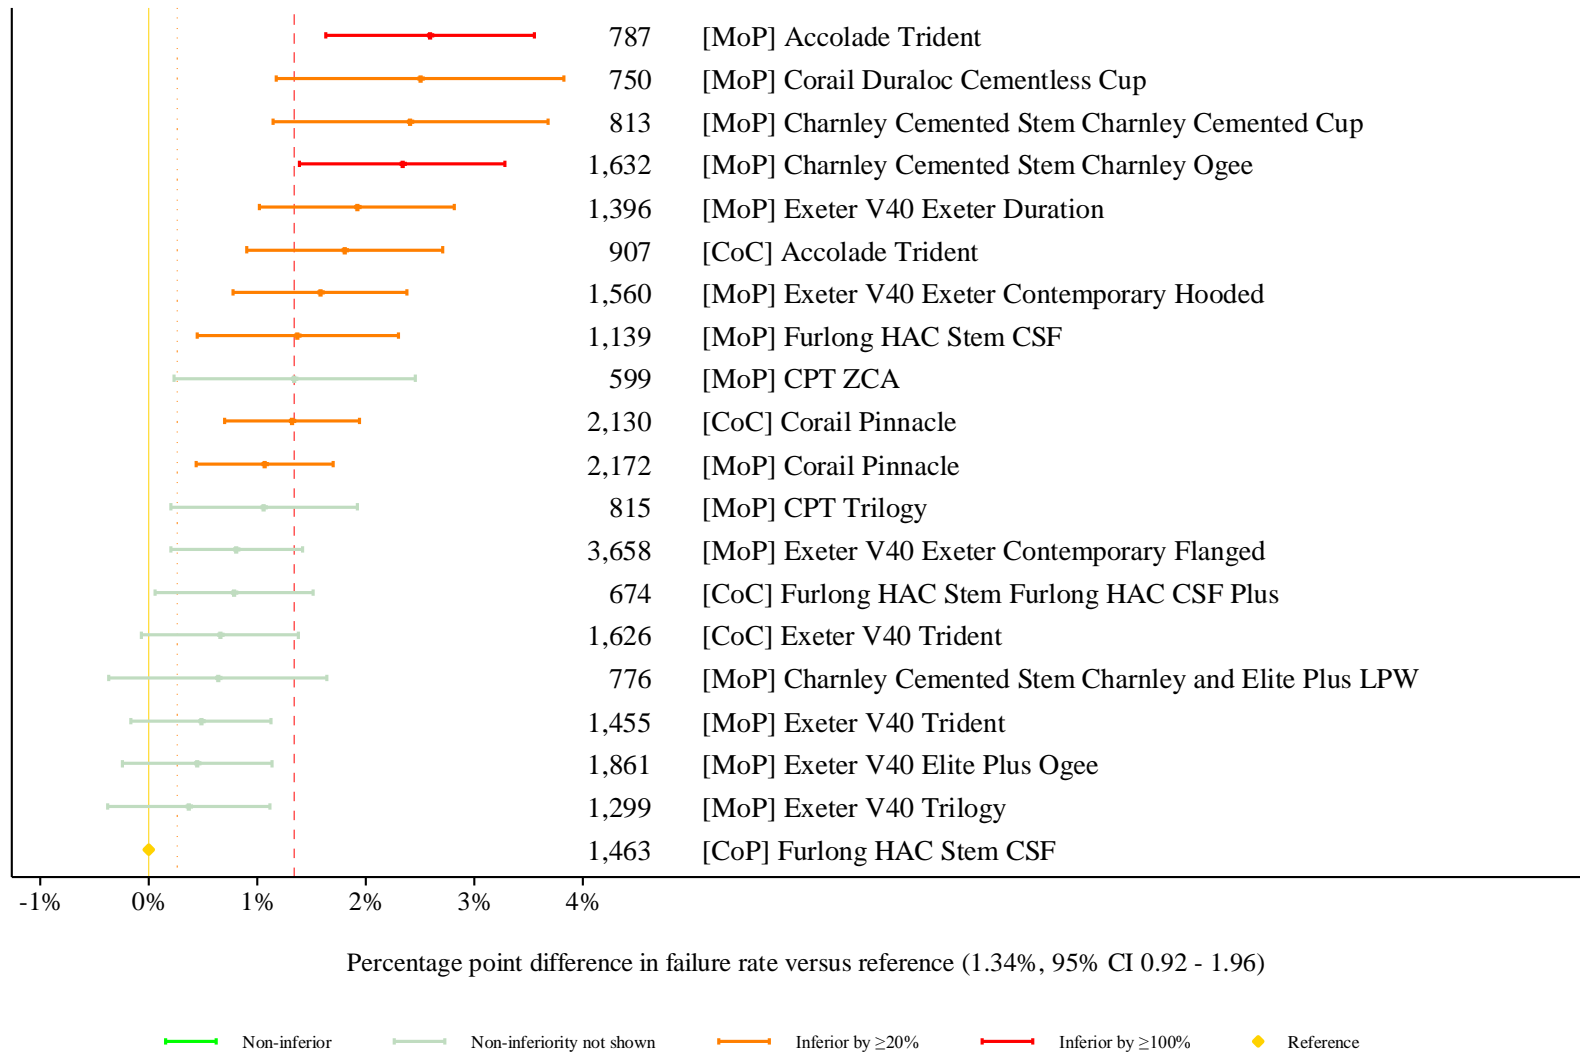

**Supplementary Figure 4c: Difference in failure of implanted constructs compared to a contemporary reference at 7 years in men greater than 75 years, using all stem-cup combinations with  $\geq 500$  procedures remaining at risk**

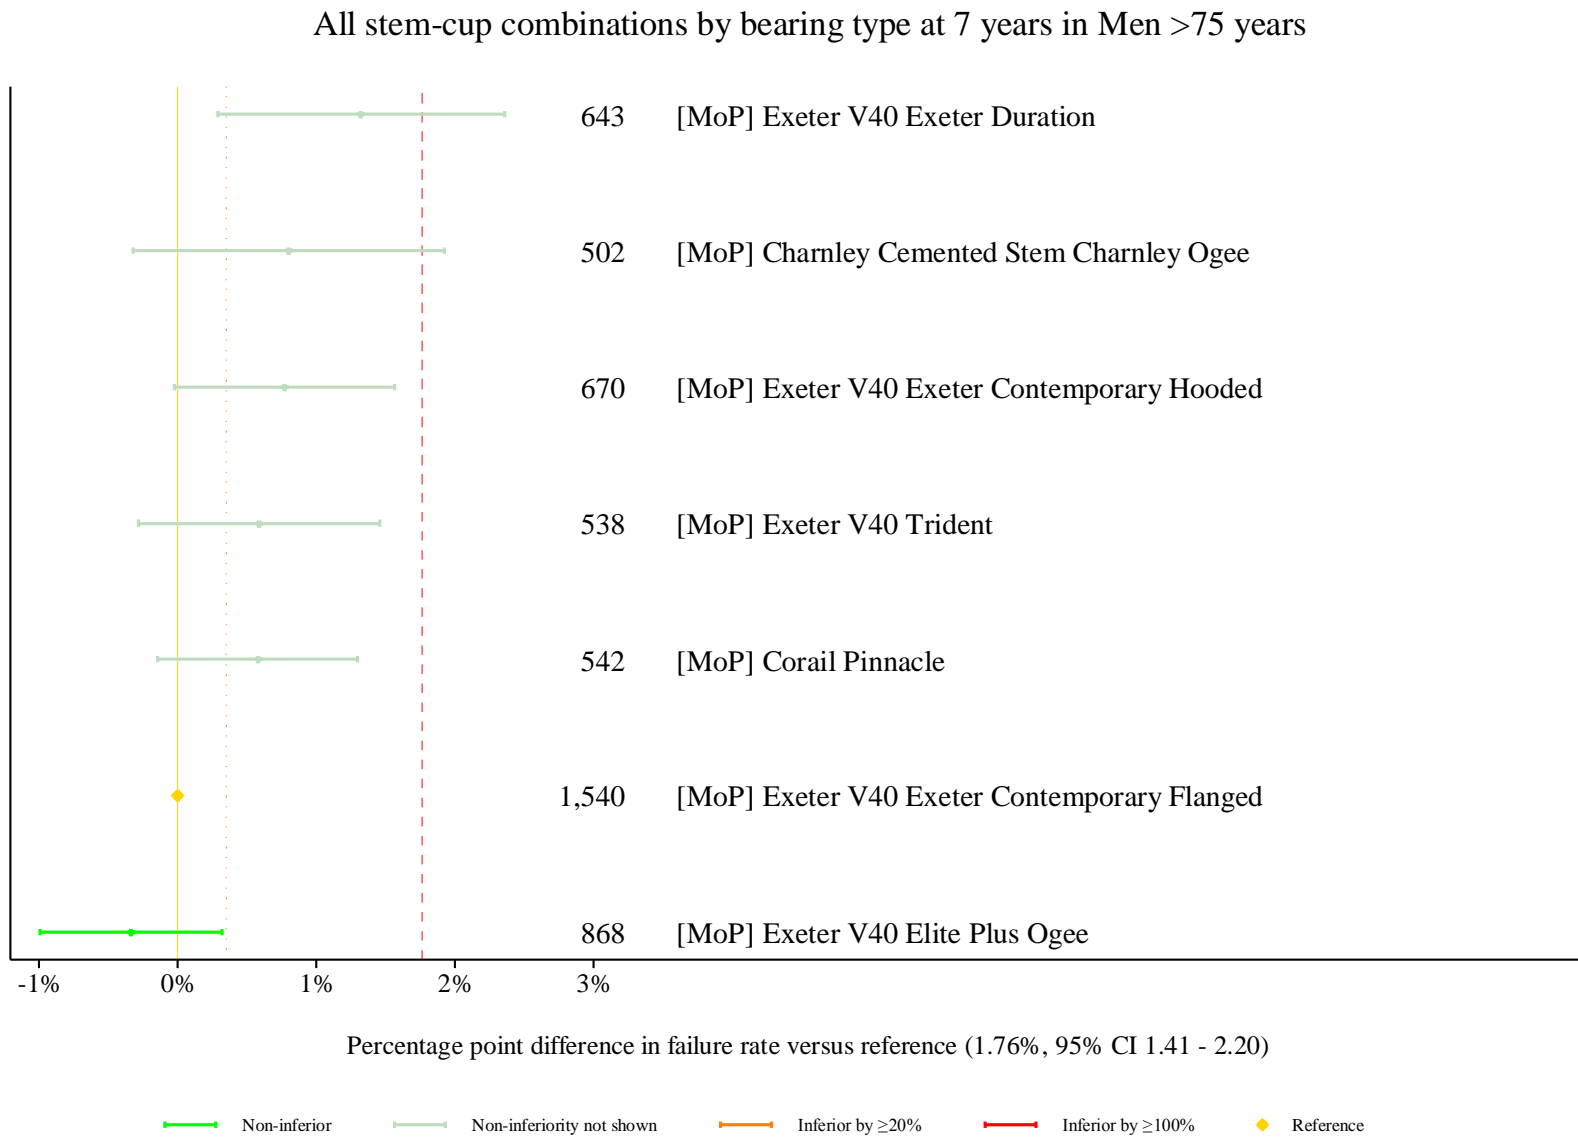

**Supplementary Figure 5a: Difference in failure of implanted constructs compared to a contemporary reference at 10 years, using all stem-cup combinations with  $\geq 500$  procedures remaining at risk**

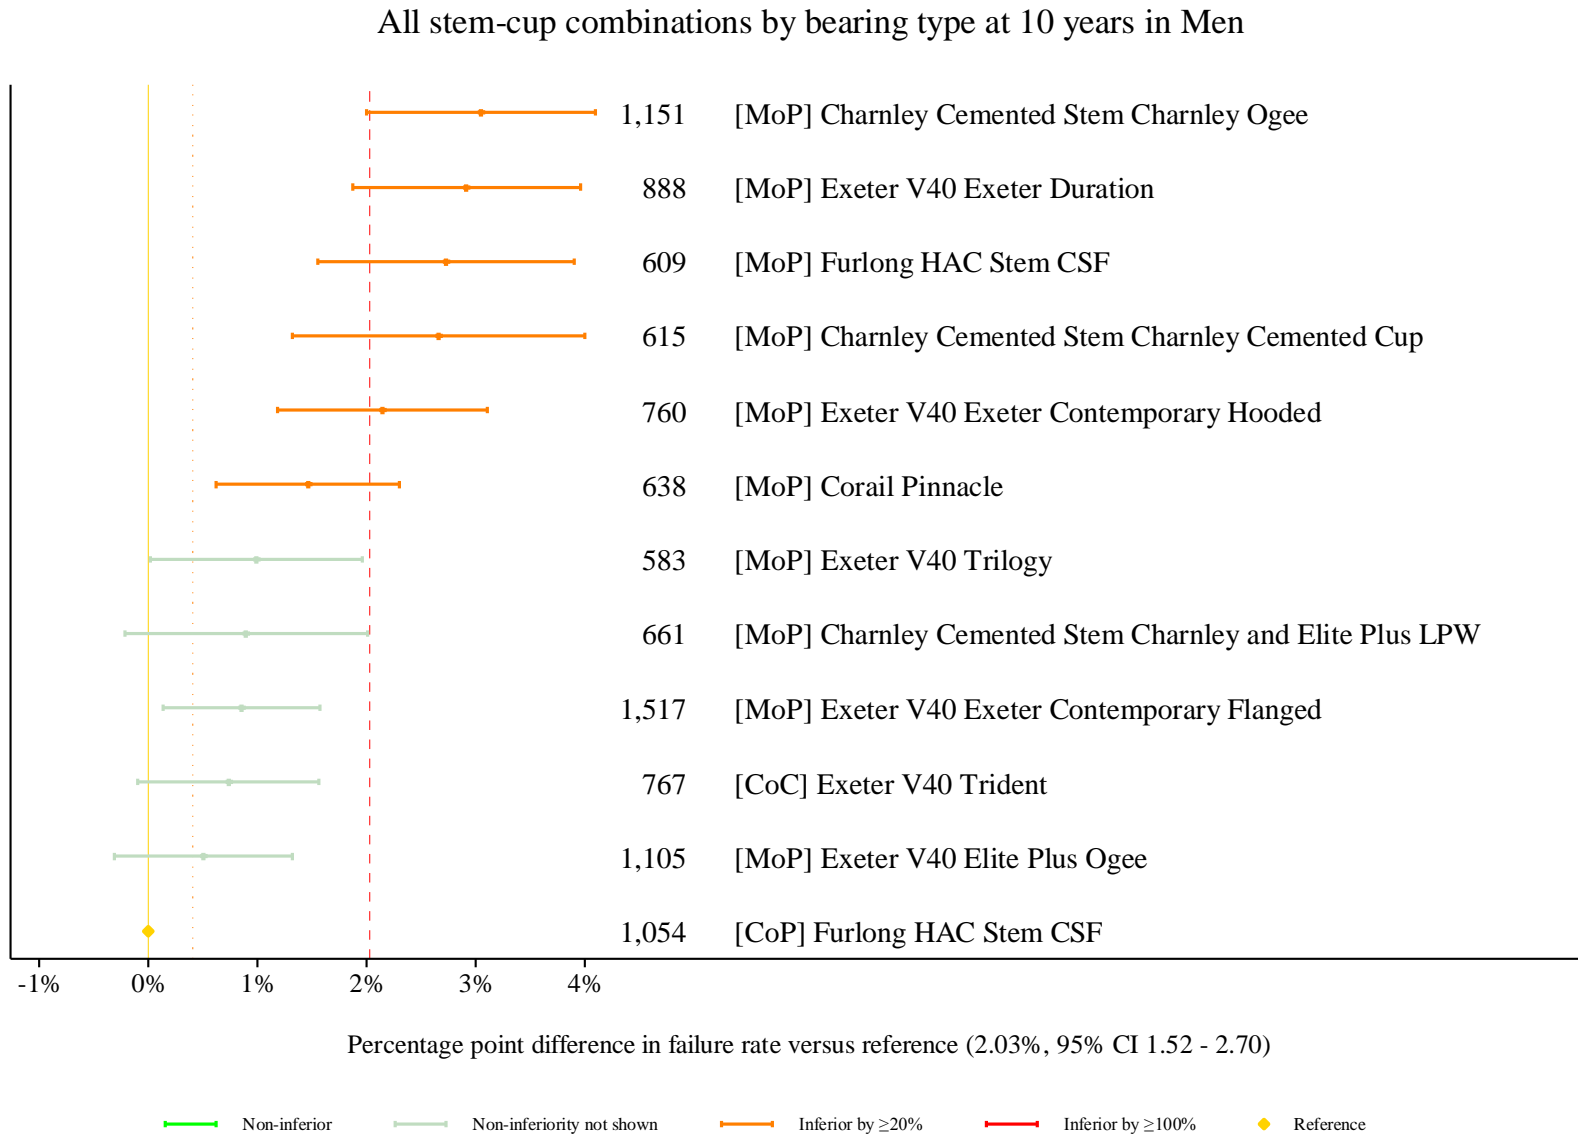

**Supplementary Figure 5b: Difference in failure of implanted constructs compared to a contemporary reference at 10 years in men between 55 and 75 years, using all stem-cup combinations with  $\geq 500$  procedures remaining at risk**

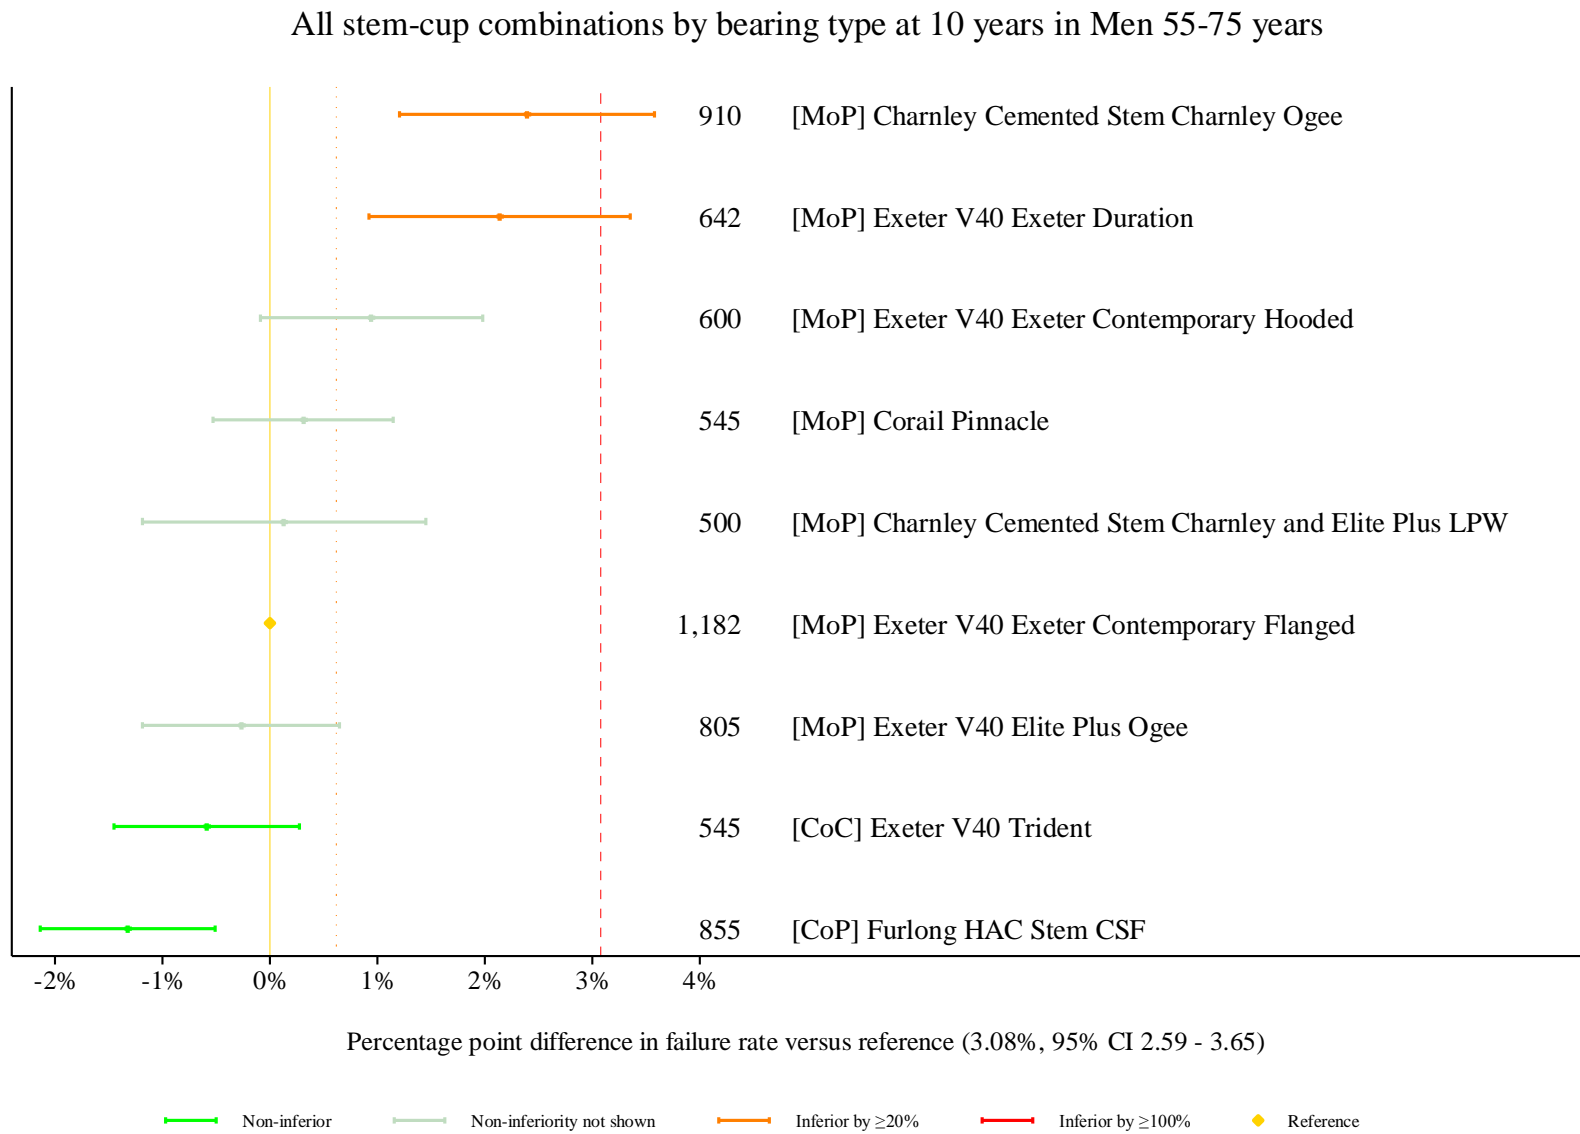

**Supplementary Figure 6a: Difference in failure of implanted constructs compared to a contemporary reference at 3 years in women, using all stem-cup combinations with  $\geq 500$  procedures remaining at risk**

**All stem-cup combinations by bearing type at 3 years in Women**

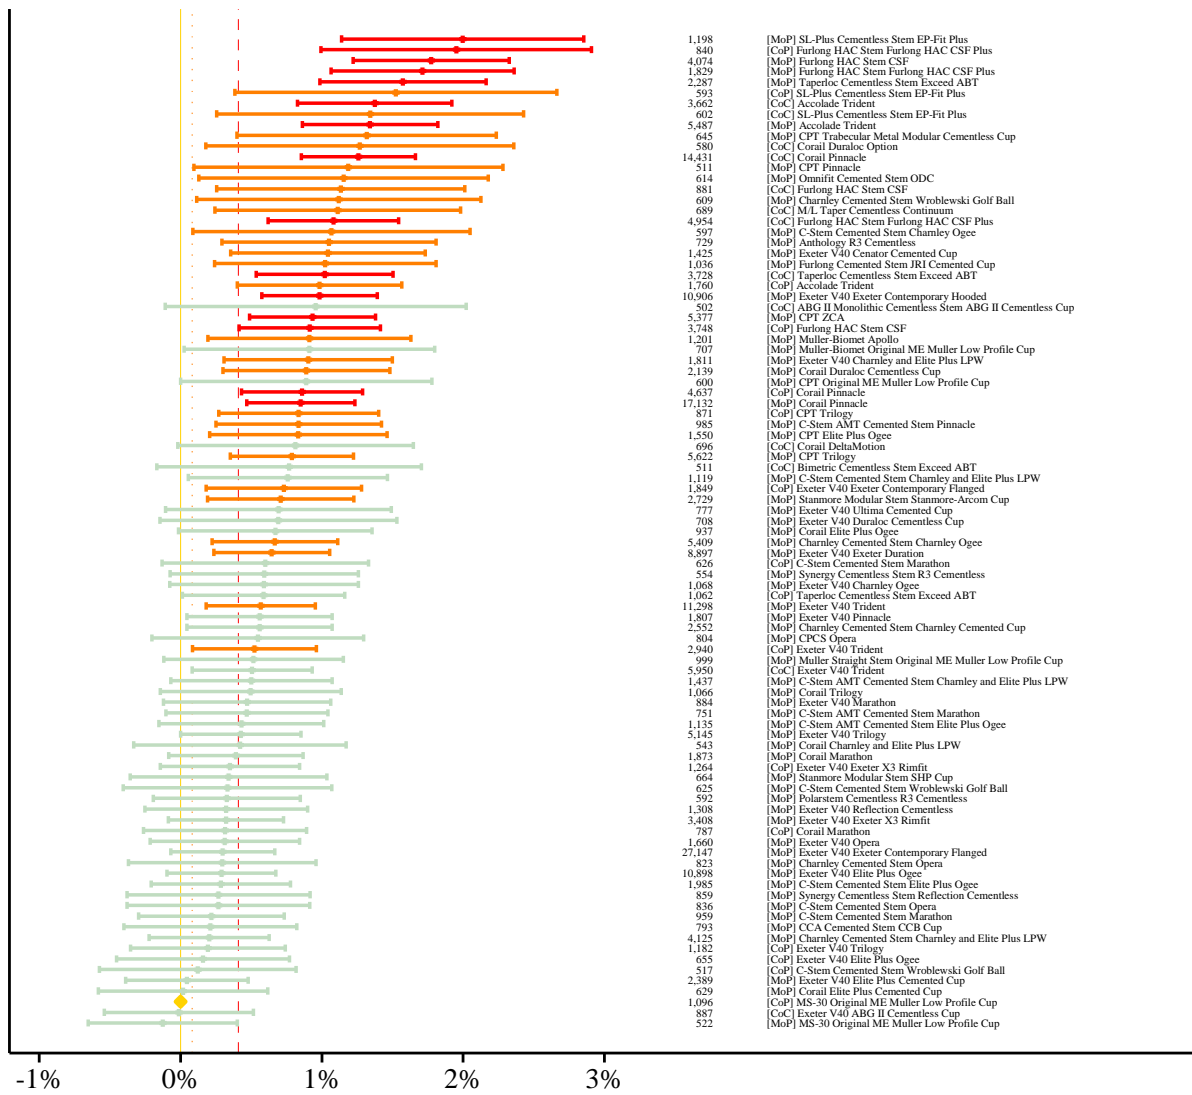

Percentage point difference in failure rate versus reference (0.41%, 95% CI 0.17 - 0.98)

— Non-inferior    
 — Non-inferiority not shown    
 — Inferior by  $\geq 20\%$     
 — Inferior by  $\geq 100\%$     
 ◆ Reference

**Supplementary Figure 6b: Difference in failure of implanted constructs compared to a contemporary reference at 3 years in women less than 55 years, using all stem-cup combinations with  $\geq 500$  procedures remaining at risk**

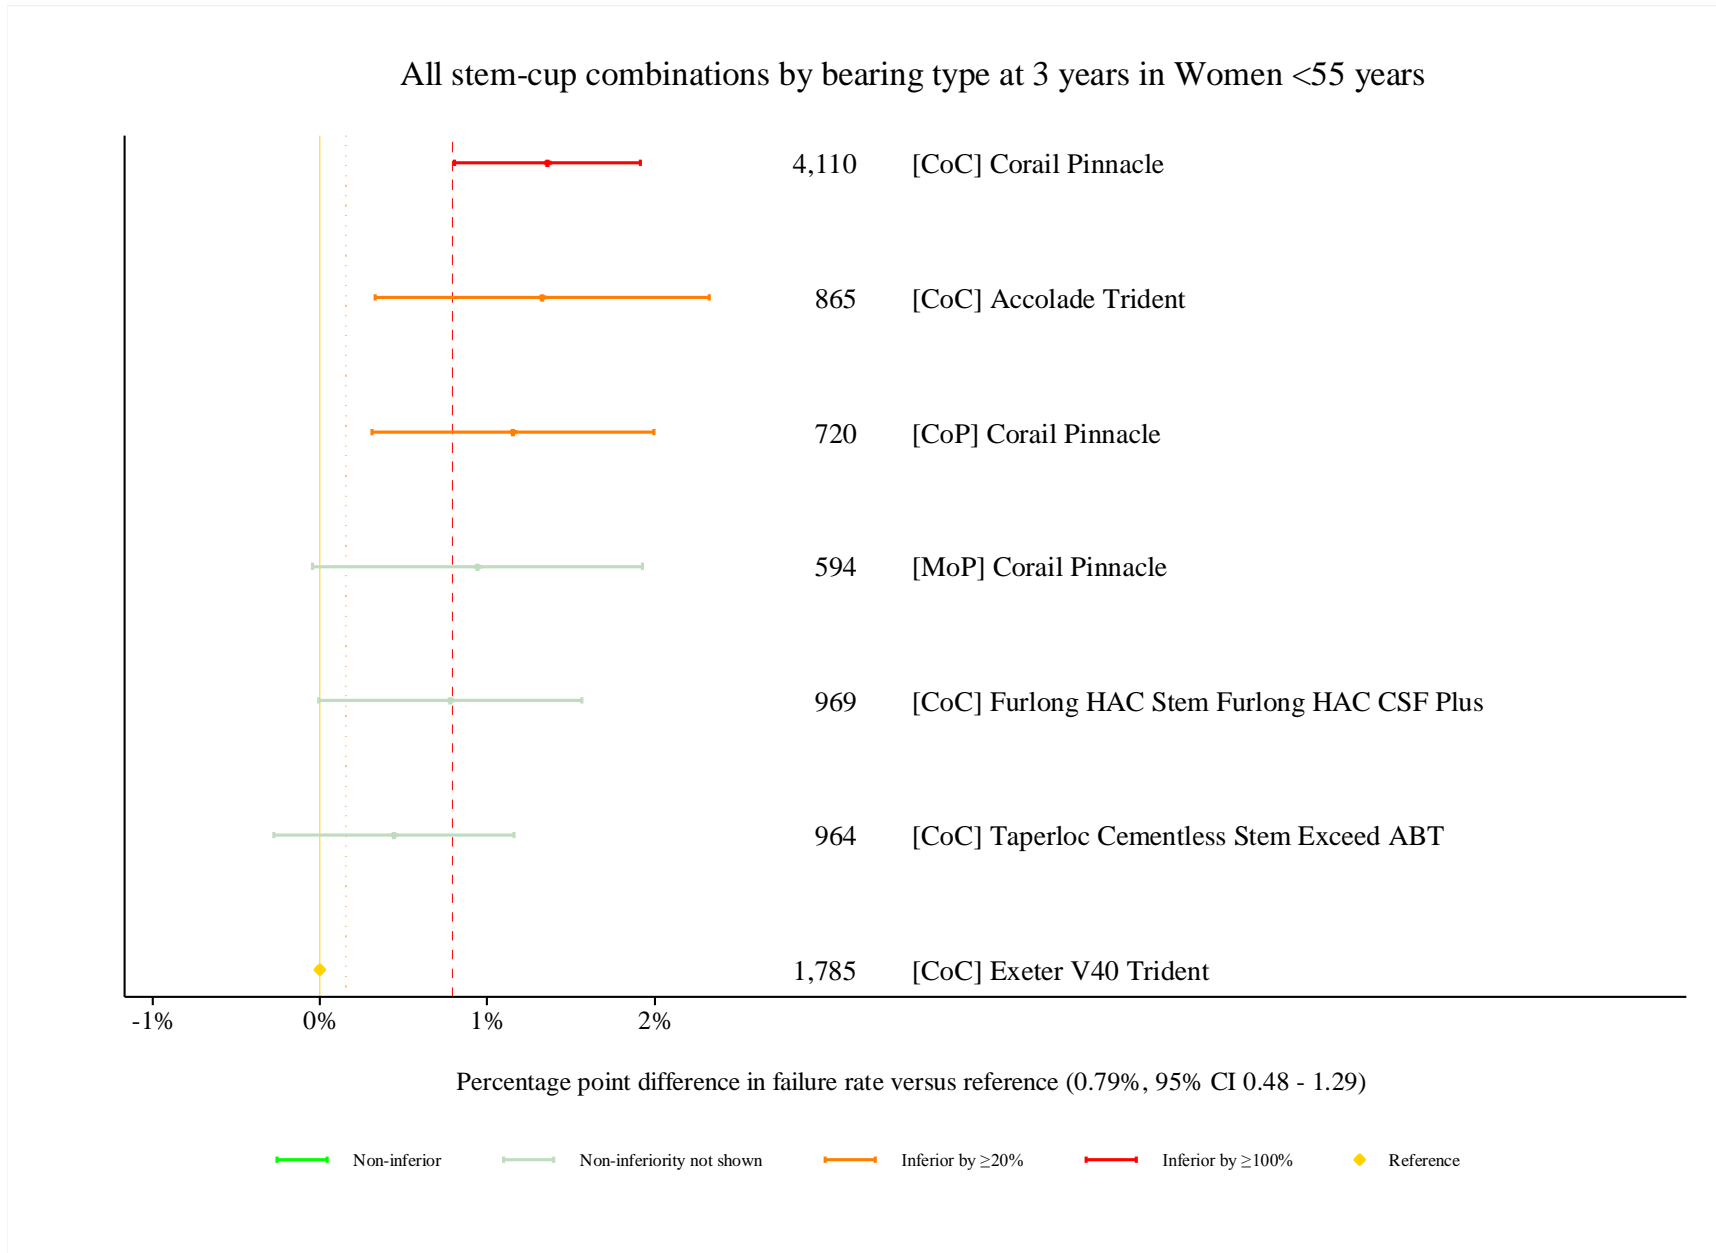



**Supplementary Figure 6c: Difference in failure of implanted constructs compared to a contemporary reference at 3 years in women between 55 and 75 years, using all stem-cup combinations with  $\geq 500$  procedures remaining at risk**

All stem-cup combinations by bearing type at 3 years in Women 55-75 years

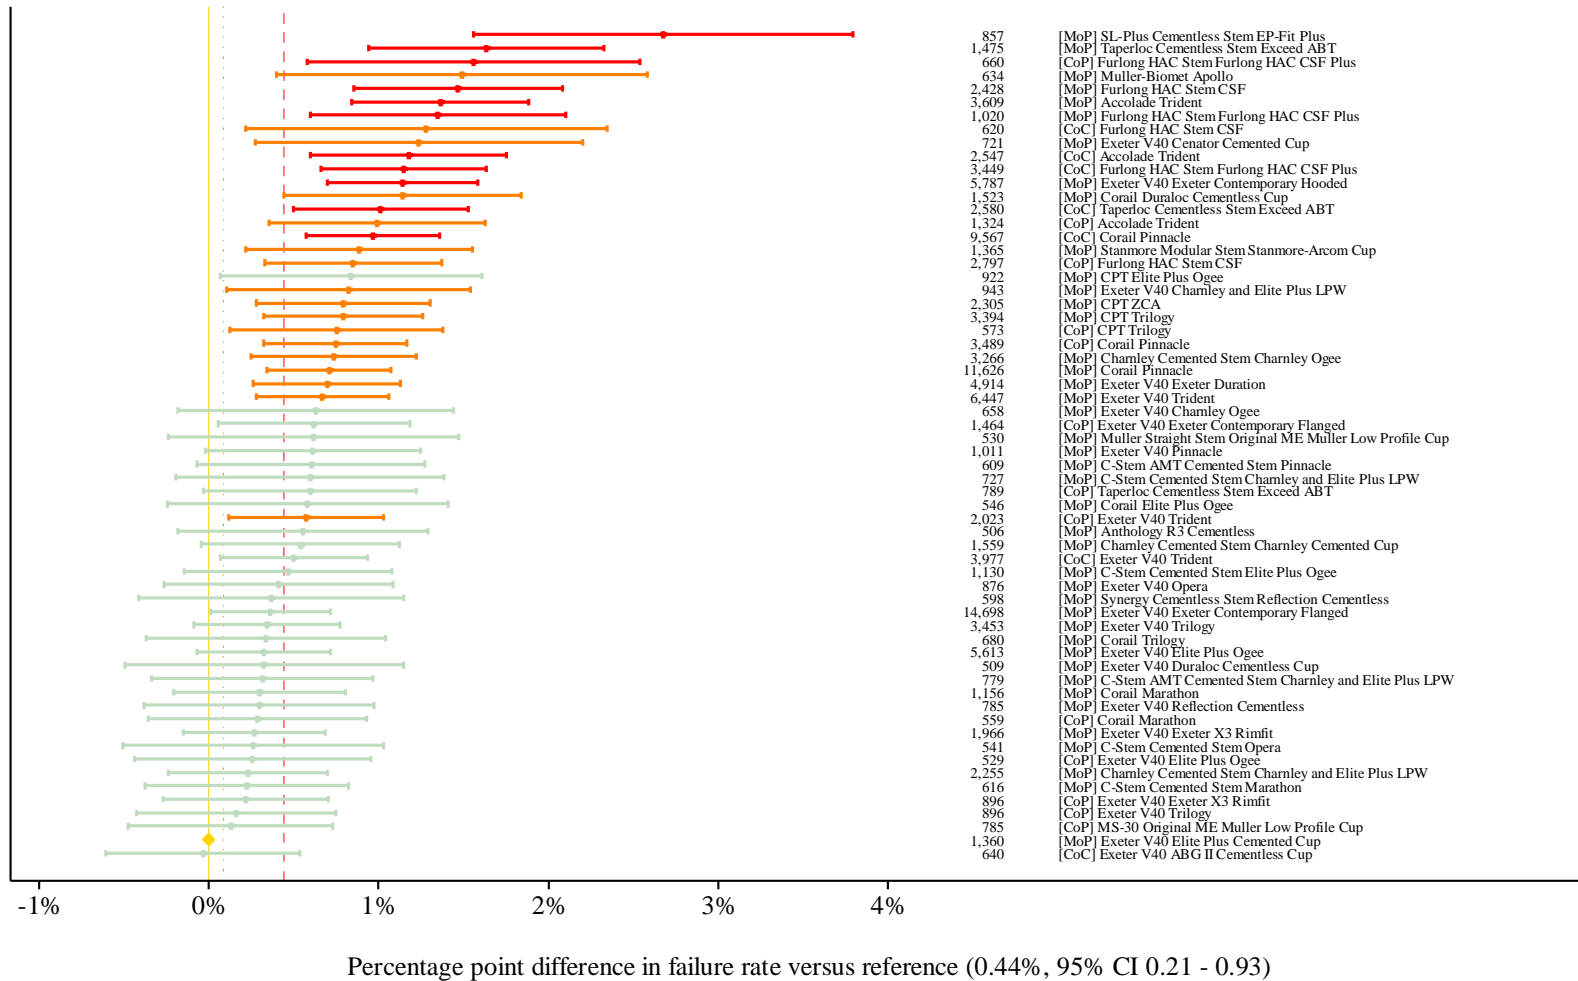

— Non-inferior    
 — Non-inferiority not shown    
 — Inferior by  $\geq 20\%$     
 — Inferior by  $\geq 100\%$     
 ◆ Reference

**Supplementary Figure 6d: Difference in failure of implanted constructs compared to a contemporary reference at 3 years in women greater than 75 years, using all stem-cup combinations with  $\geq 500$  procedures remaining at risk**

All stem-cup combinations by bearing type at 3 years in Men >75 years

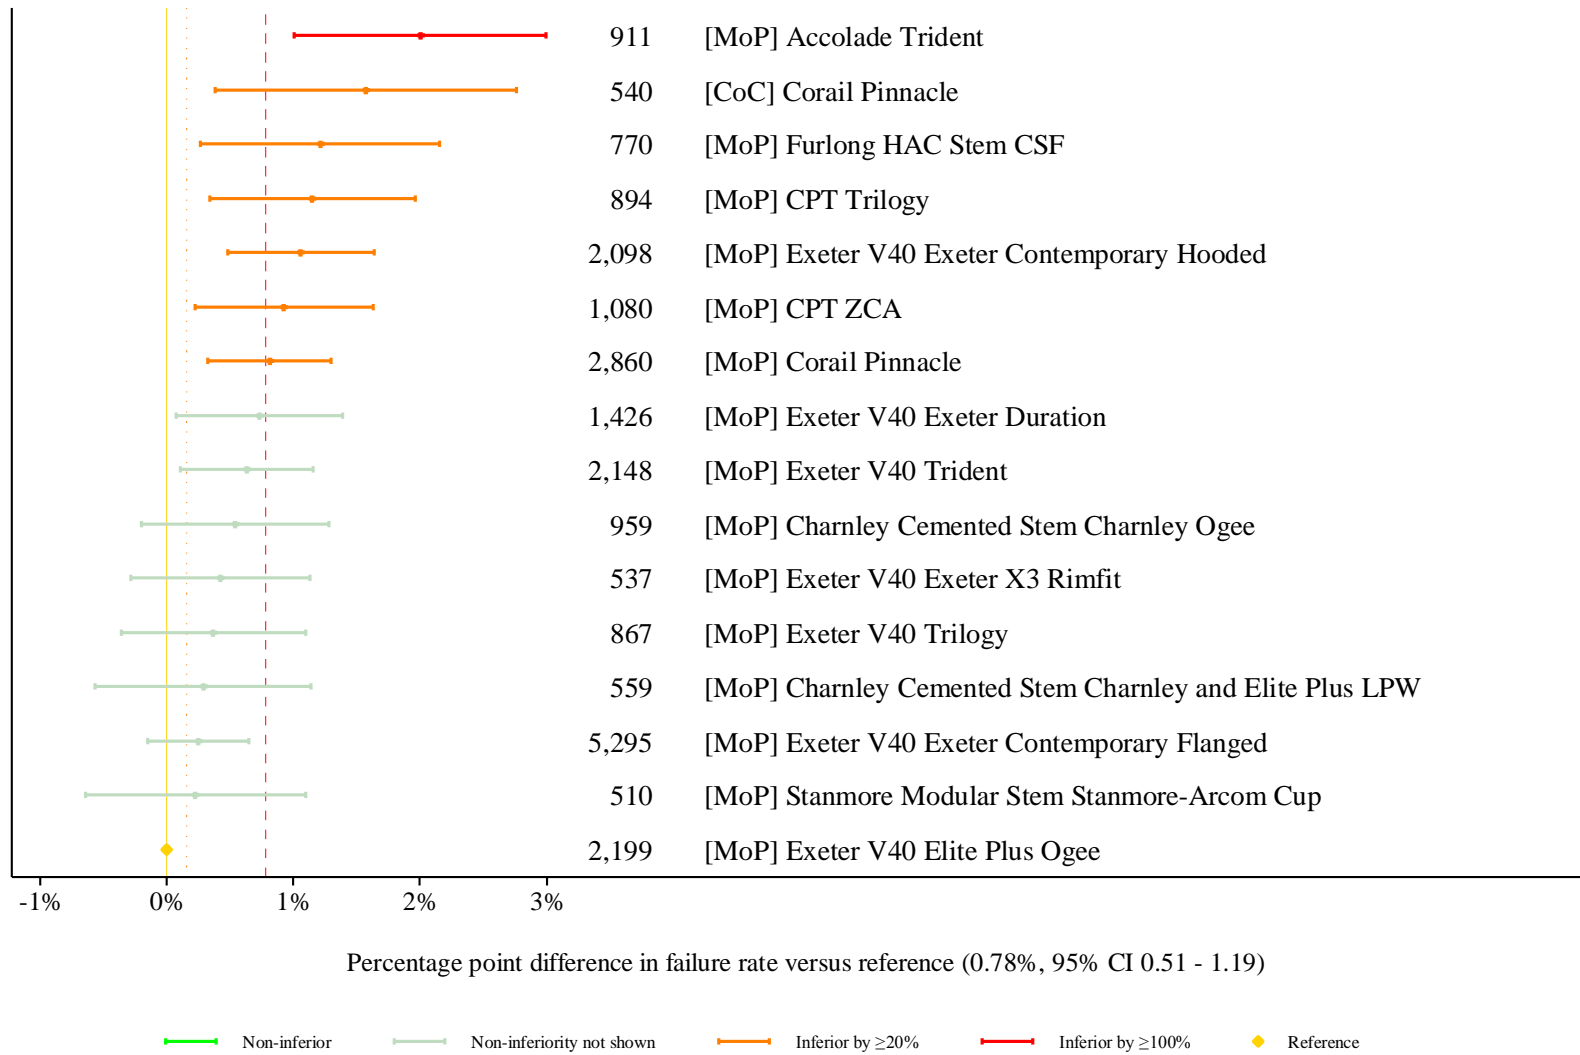

Supplementary Figure 7a: Difference in failure of implanted constructs compared to a contemporary reference at 5 years in women, using all stem-cup combinations with  $\geq 500$  procedures remaining at risk

All stem-cup combinations by bearing type at 5 years in Women

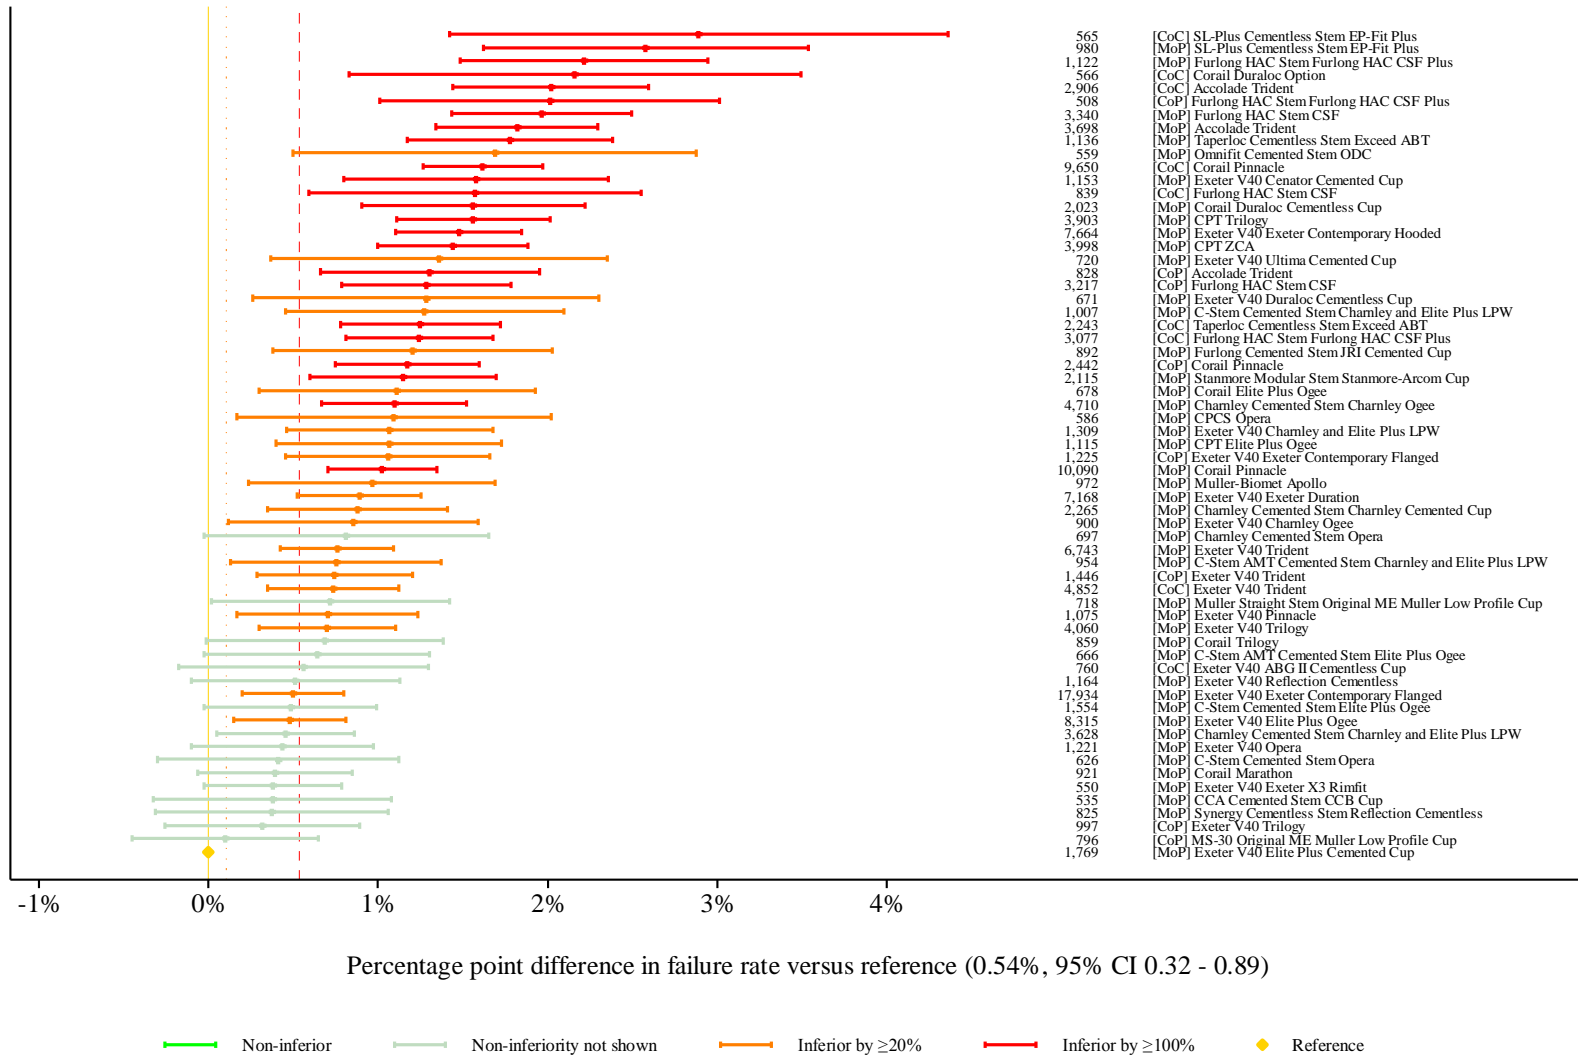

**Supplementary Figure 7b: Difference in failure of implanted constructs compared to a contemporary reference at 5 years in women less than 55 years, using all stem-cup combinations with  $\geq 500$  procedures remaining at risk**

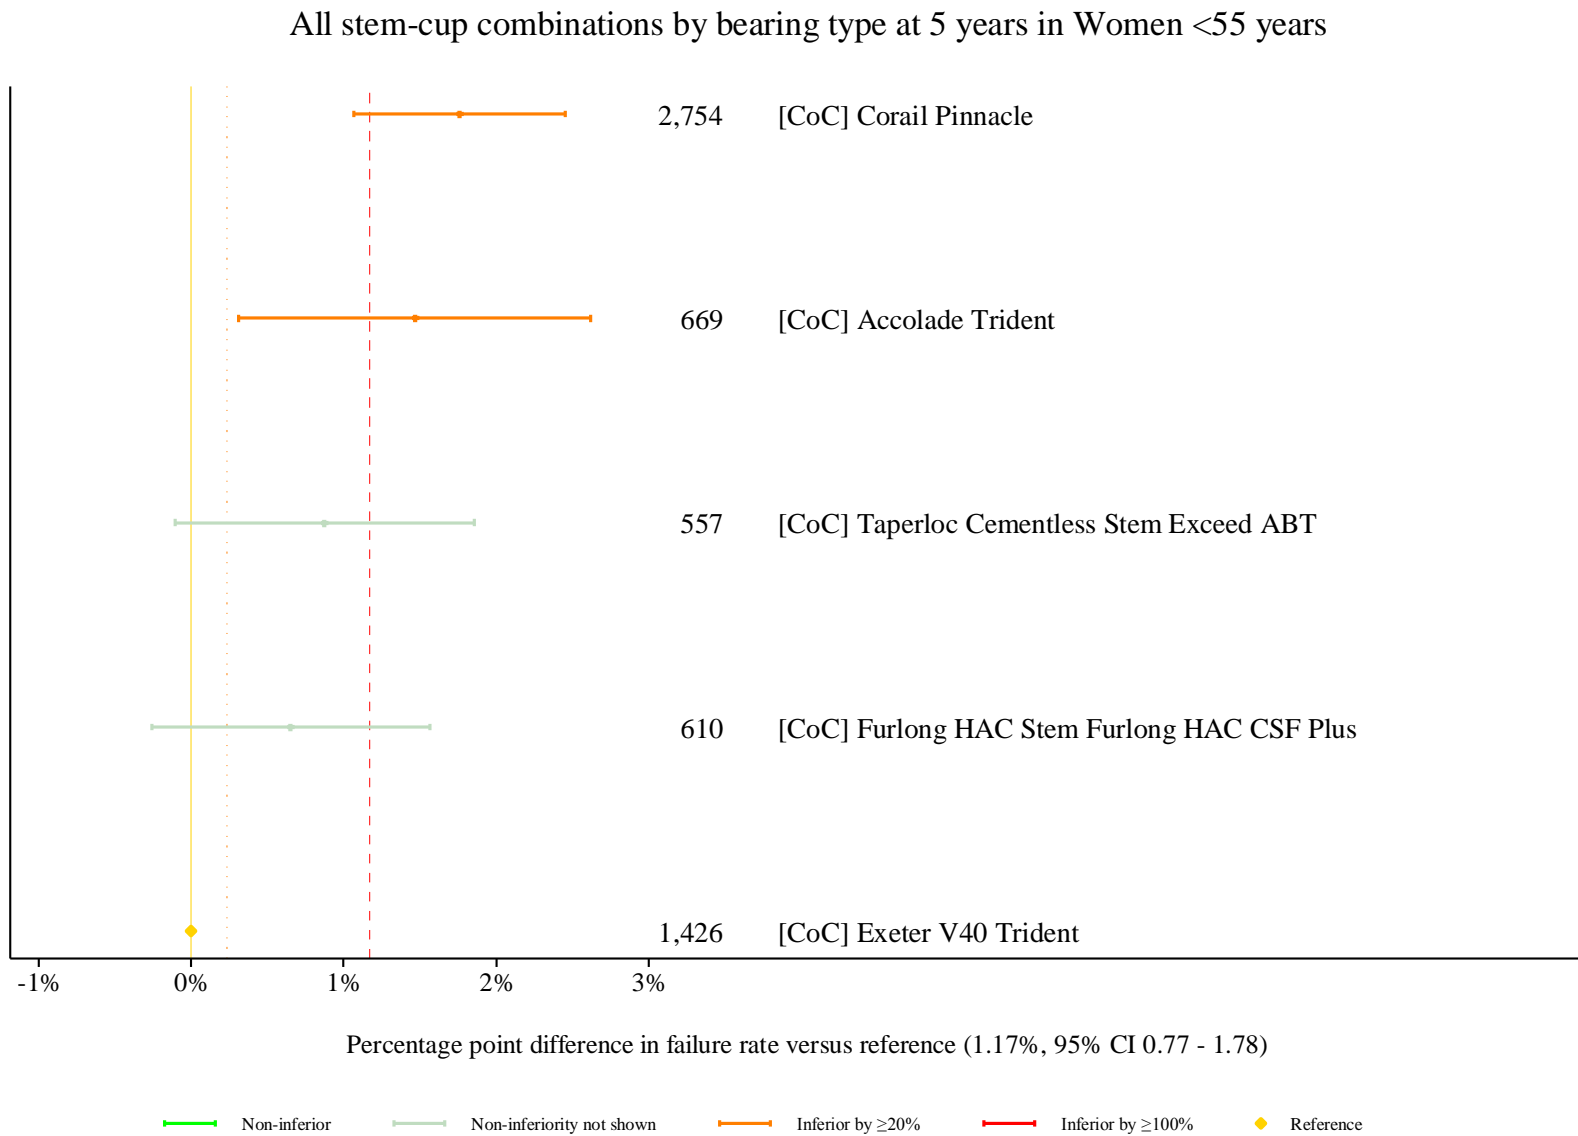

Supplementary Figure 7c: Difference in failure of implanted constructs compared to a contemporary reference at 5 years in women between 55 and 75 years, using all stem-cup combinations with  $\geq 500$  procedures remaining at risk

All stem-cup combinations by bearing type at 5 years in Women 55-75 years

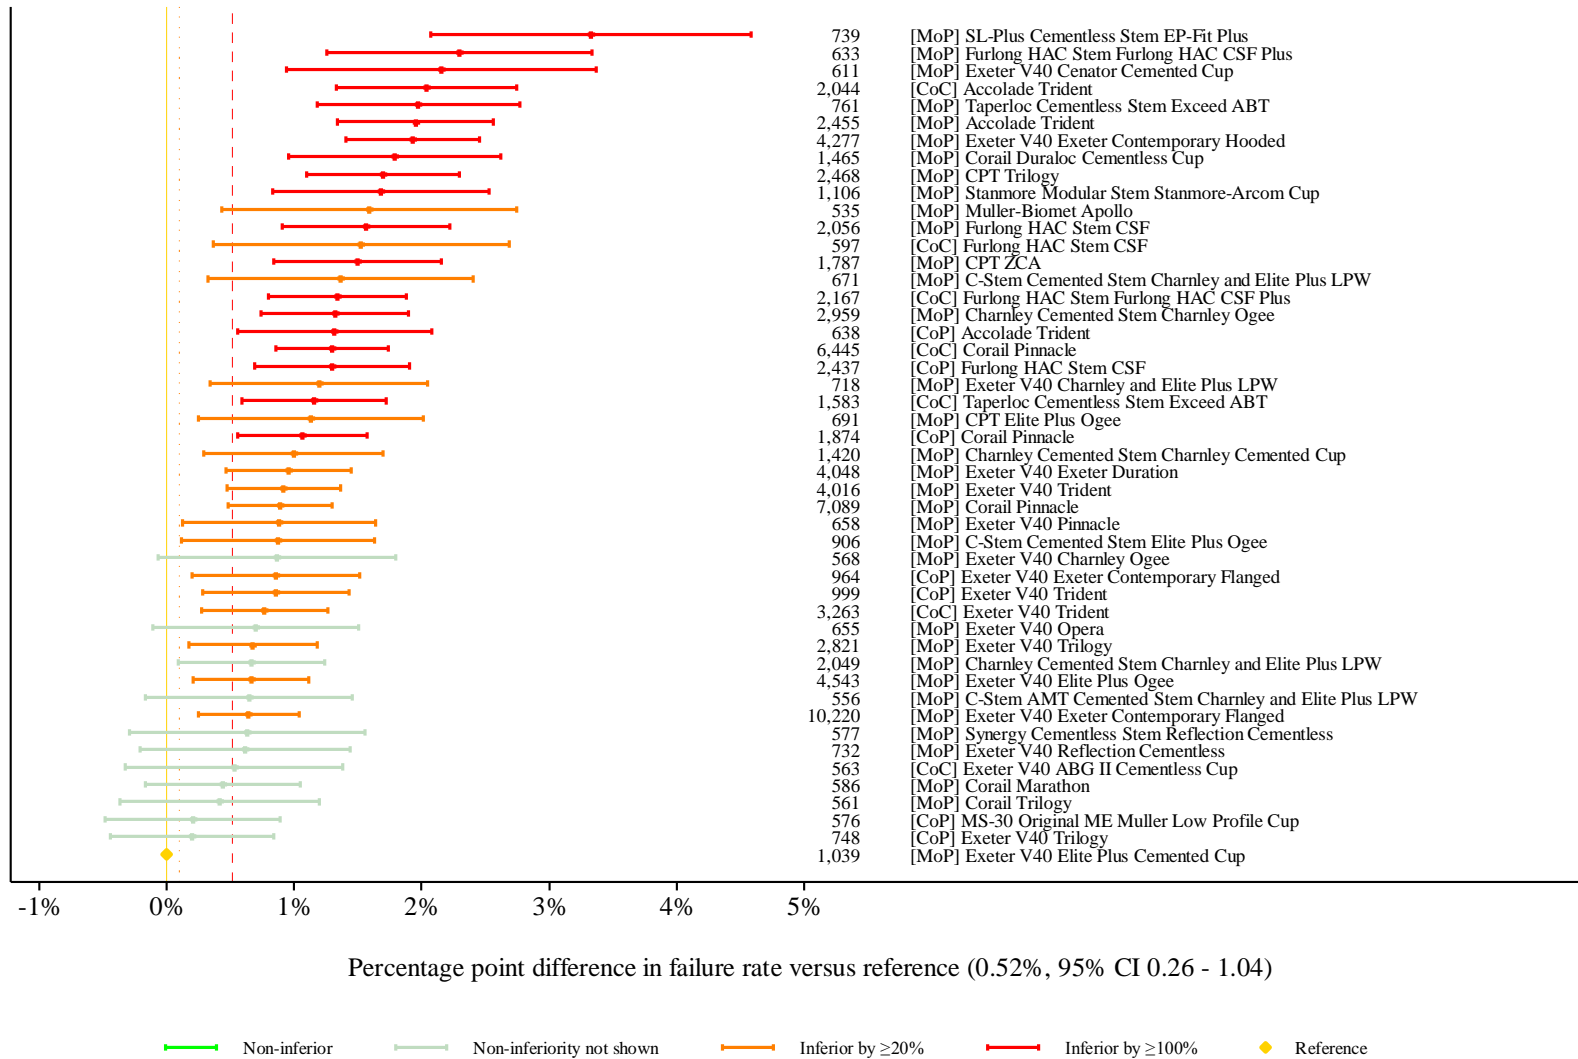

**Supplementary Figure 7d: Difference in failure of implanted constructs compared to a contemporary reference at 5 years in women greater than 75 years, using all stem-cup combinations with  $\geq 500$  procedures remaining at risk**

All stem-cup combinations by bearing type at 5 years in Women >75 years

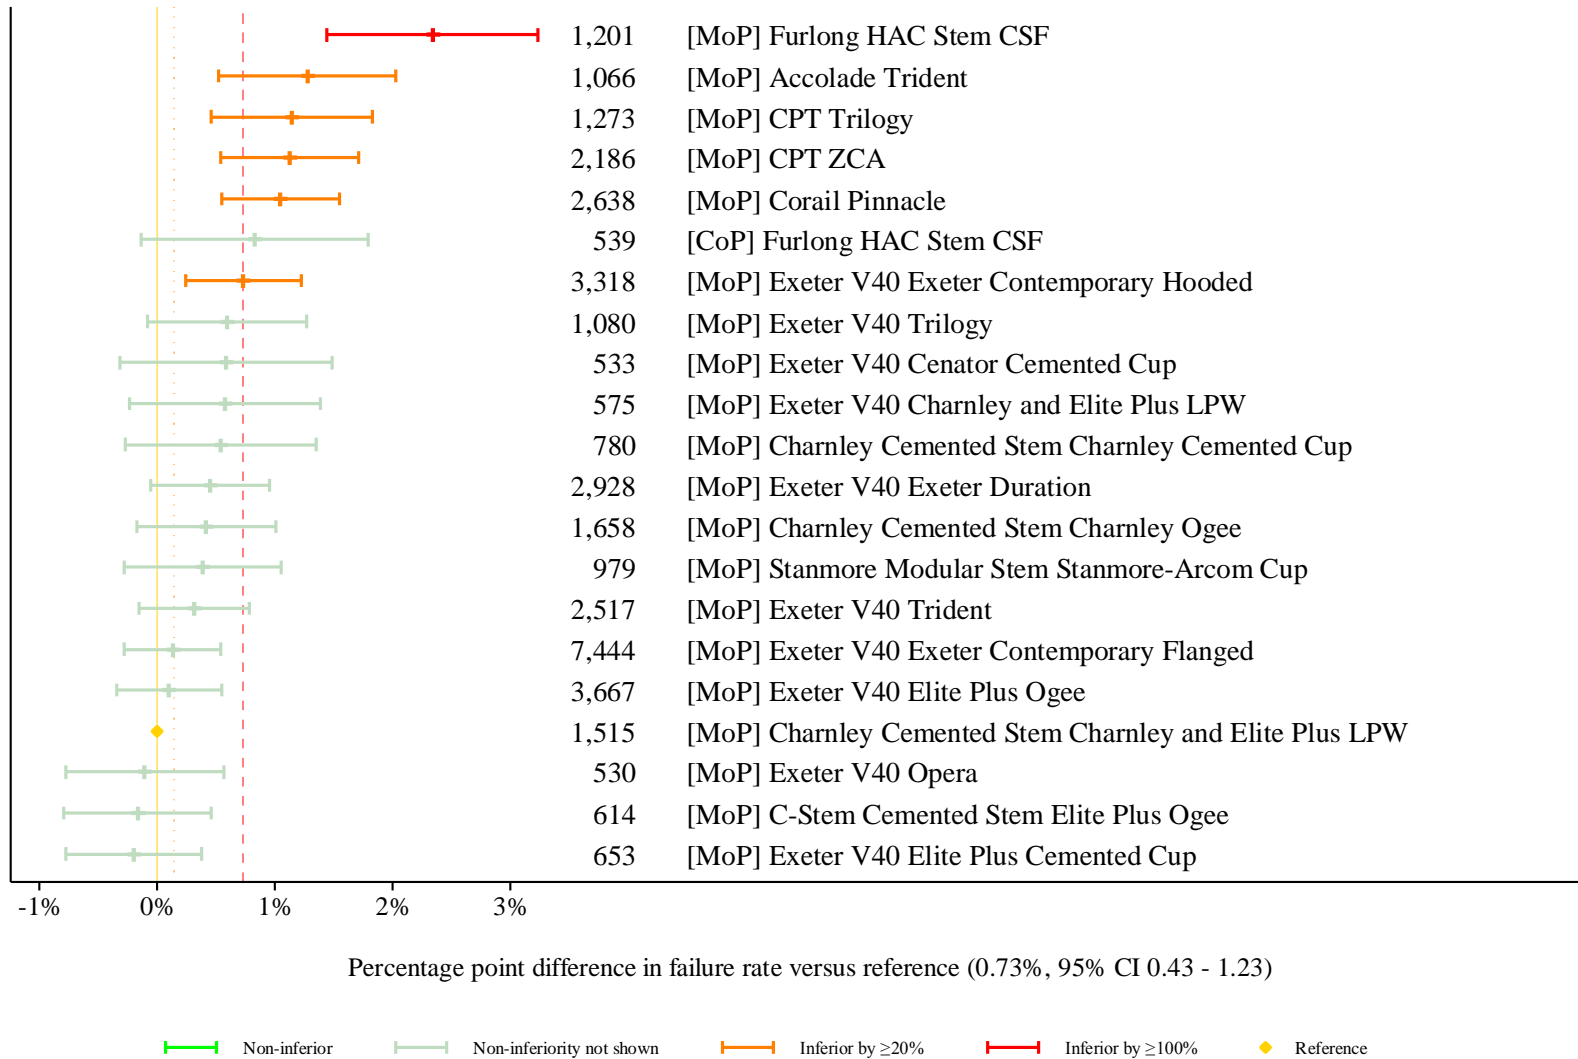

Supplementary Figure 8a: Difference in failure of implanted constructs compared to a contemporary reference at 7 years in women, using all stem-cup combinations with  $\geq 500$  procedures remaining at risk

All stem-cup combinations by bearing type at 7 years in Women

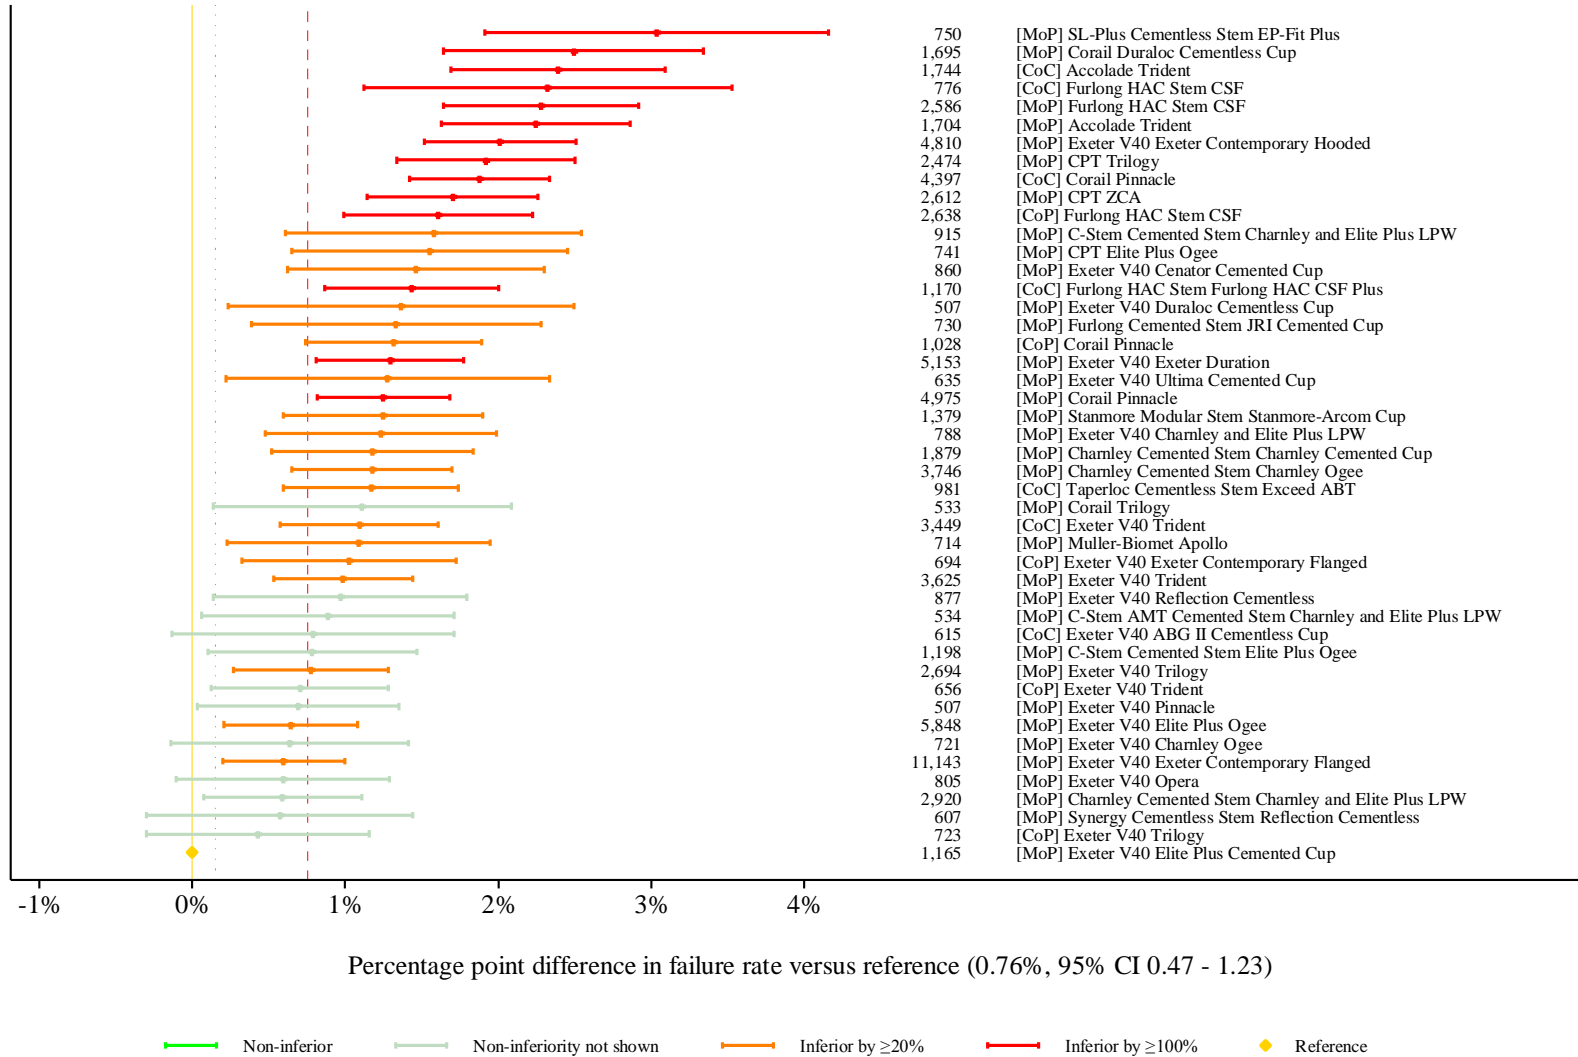

Supplementary Figure 8b: Difference in failure of implanted constructs compared to a contemporary reference at 7 years in women less than 55 years, using all stem-cup combinations with  $\geq 500$  procedures remaining at risk

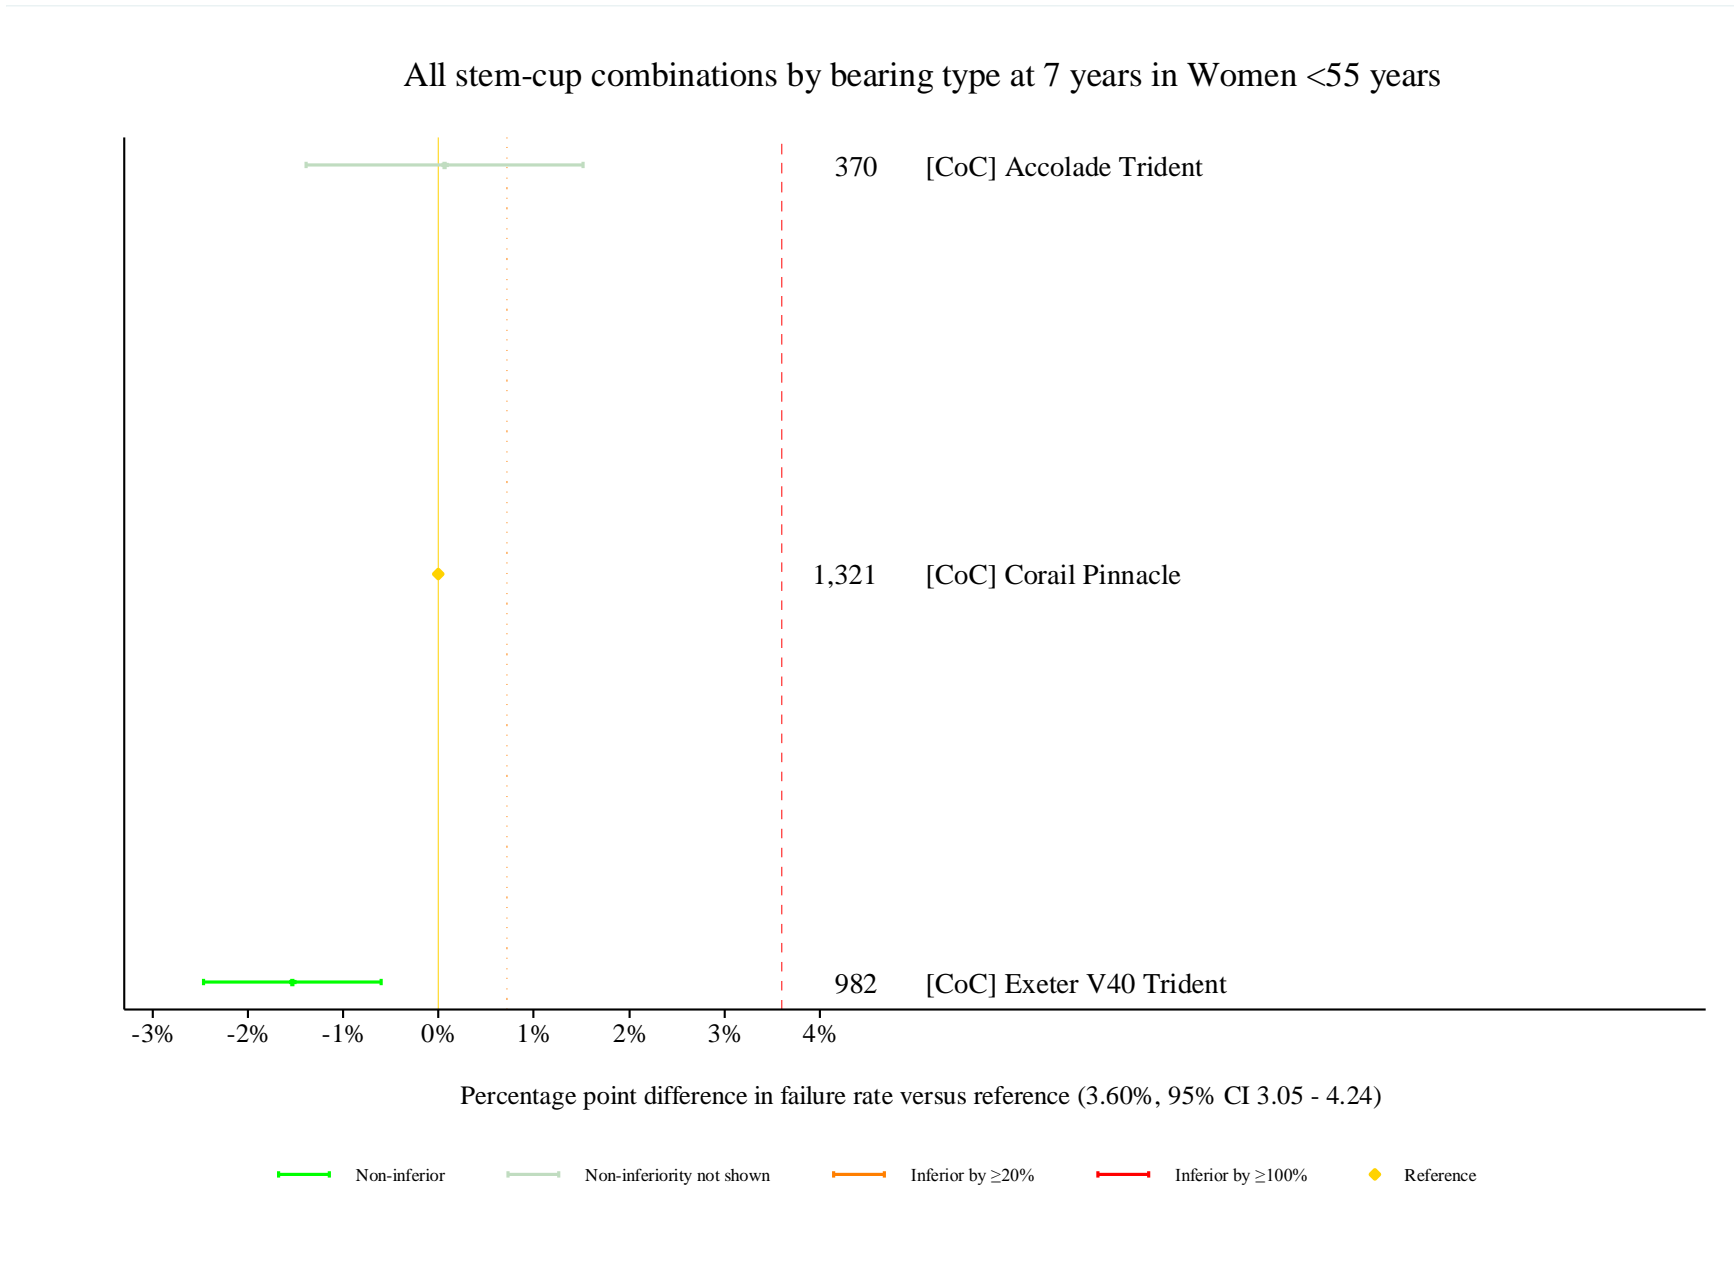



**Supplementary Figure 8c: Difference in failure of implanted constructs compared to a contemporary reference at 7 years in women between 55 and 75 years, using all stem-cup combinations with  $\geq 500$  procedures remaining at risk**

All stem-cup combinations by bearing type at 7 years in Women 55-75 years

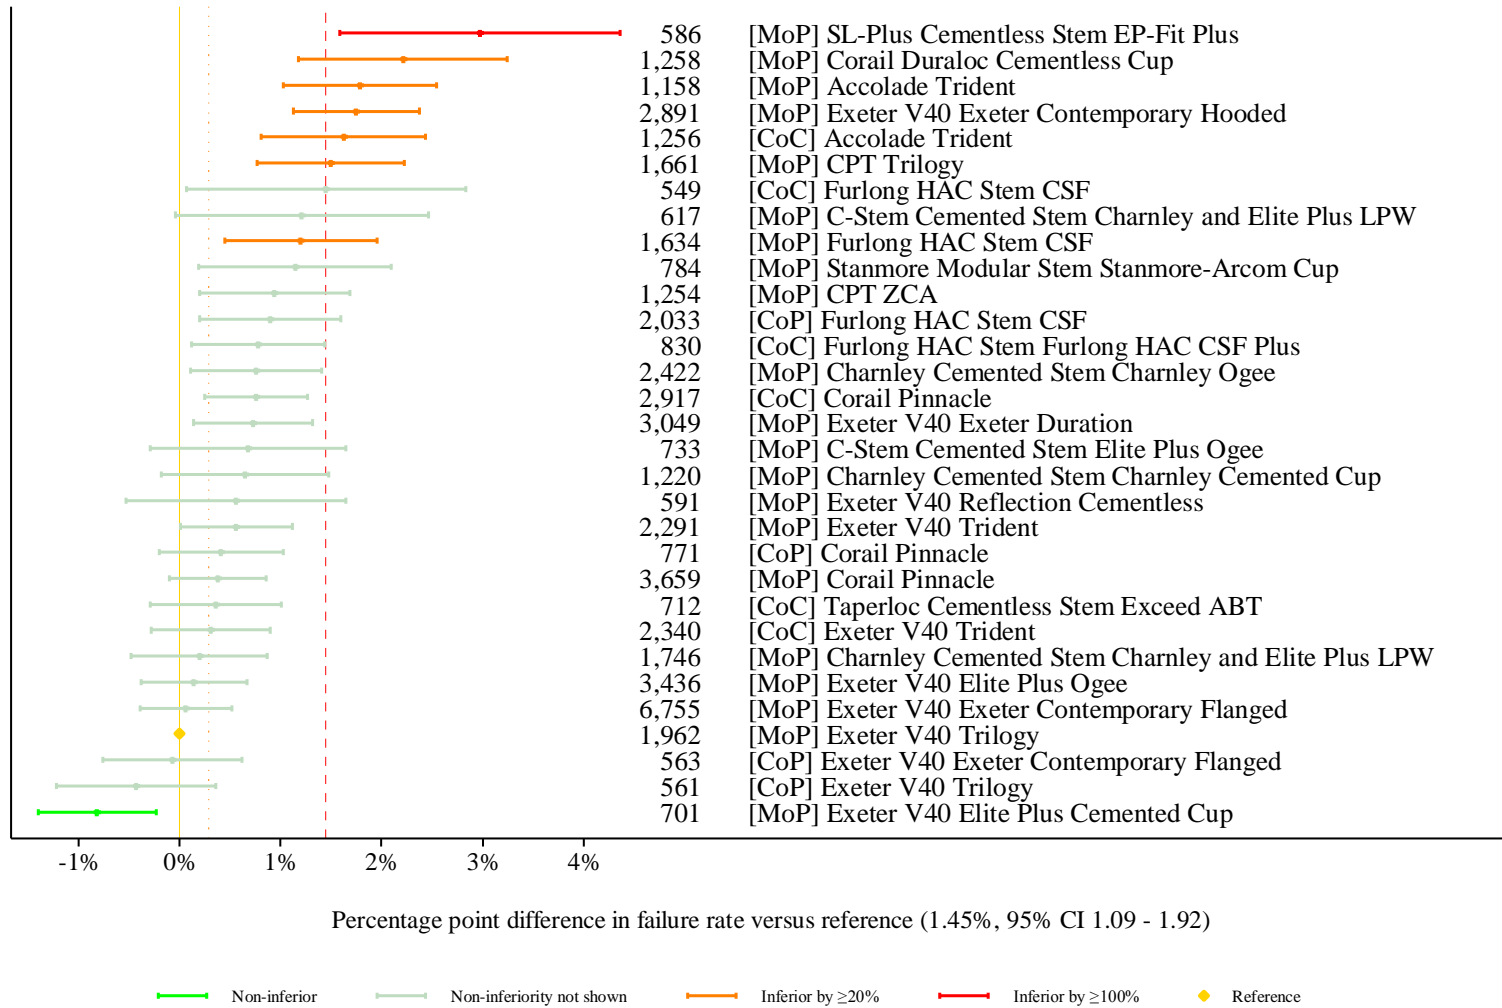

**Supplementary Figure 8d: Difference in failure of implanted constructs compared to a contemporary reference at 7 years in women greater than 75 years, using all stem-cup combinations with  $\geq 500$  procedures remaining at risk**

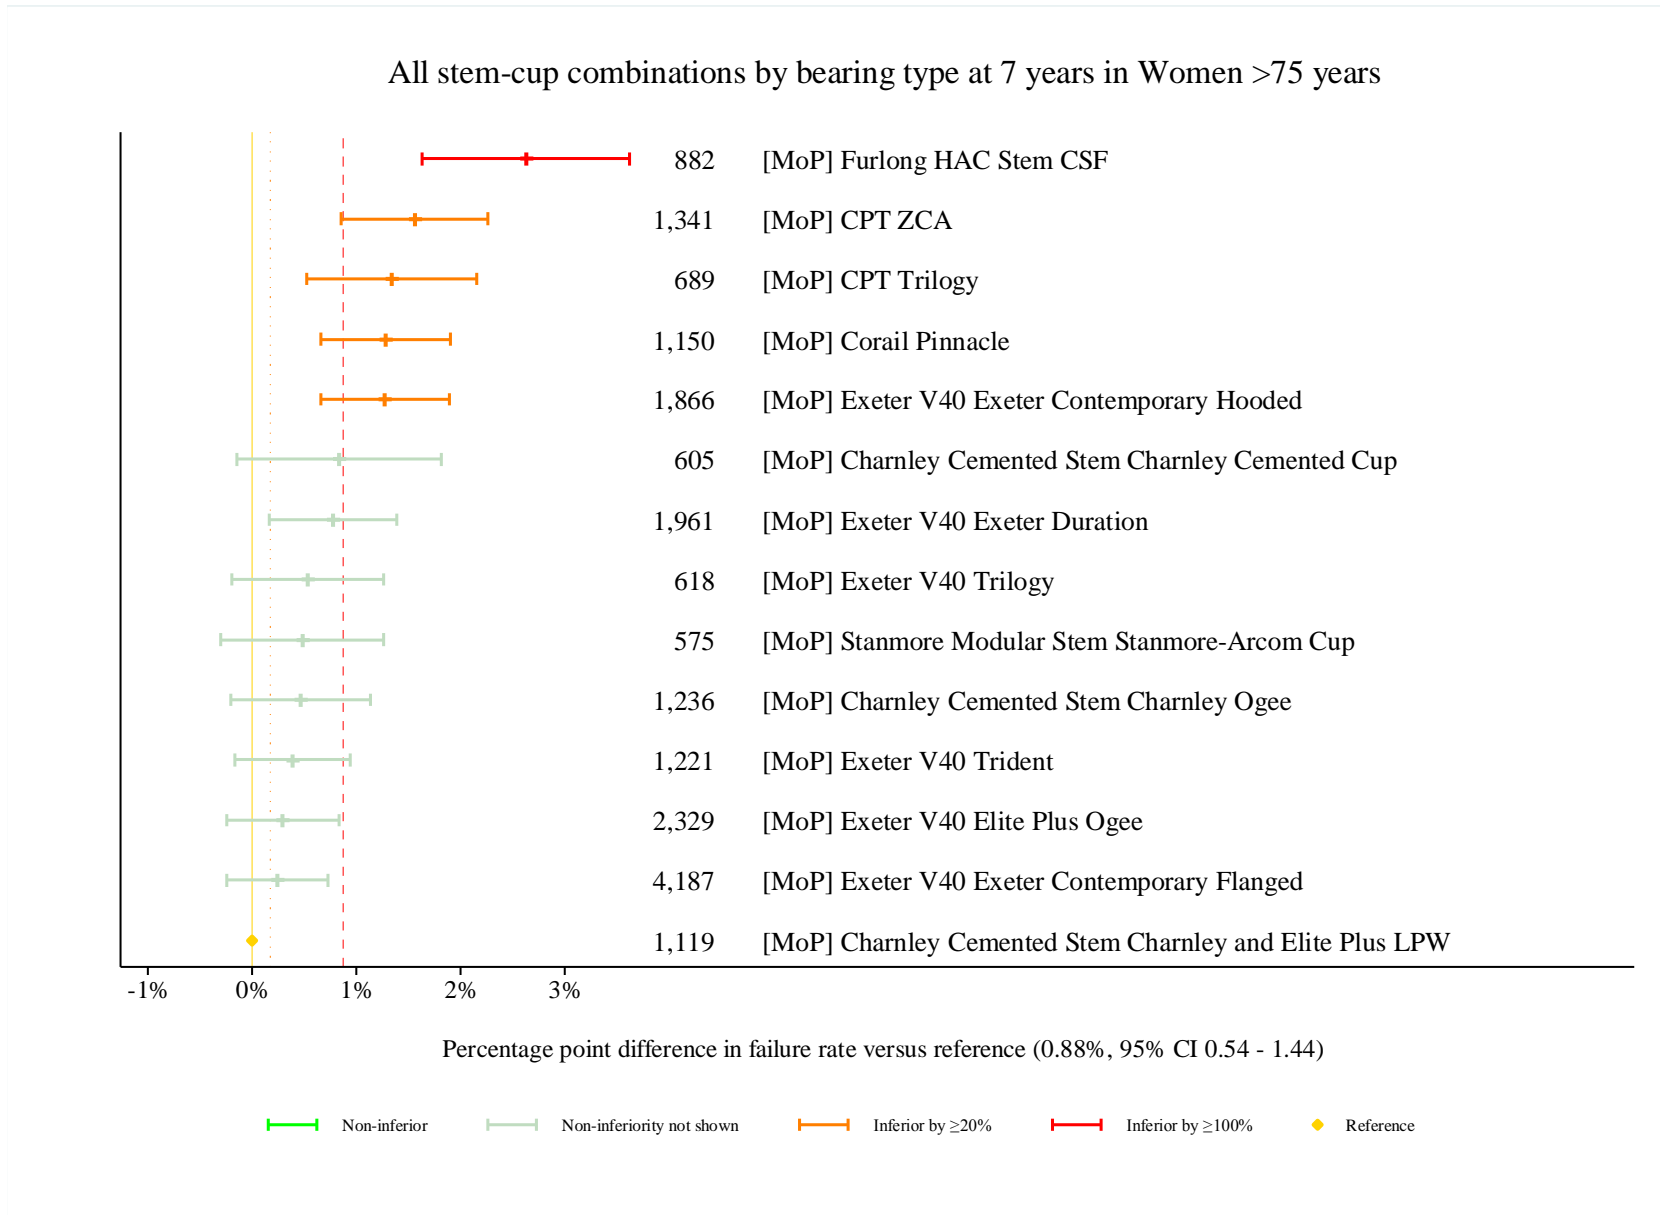

**Supplementary Figure 9a: Difference in failure of implanted constructs compared to a contemporary reference at 10 years in women, using all stem-cup combinations with  $\geq 500$  procedures remaining at risk**

**All stem-cup combinations by bearing type at 10 years in Women**

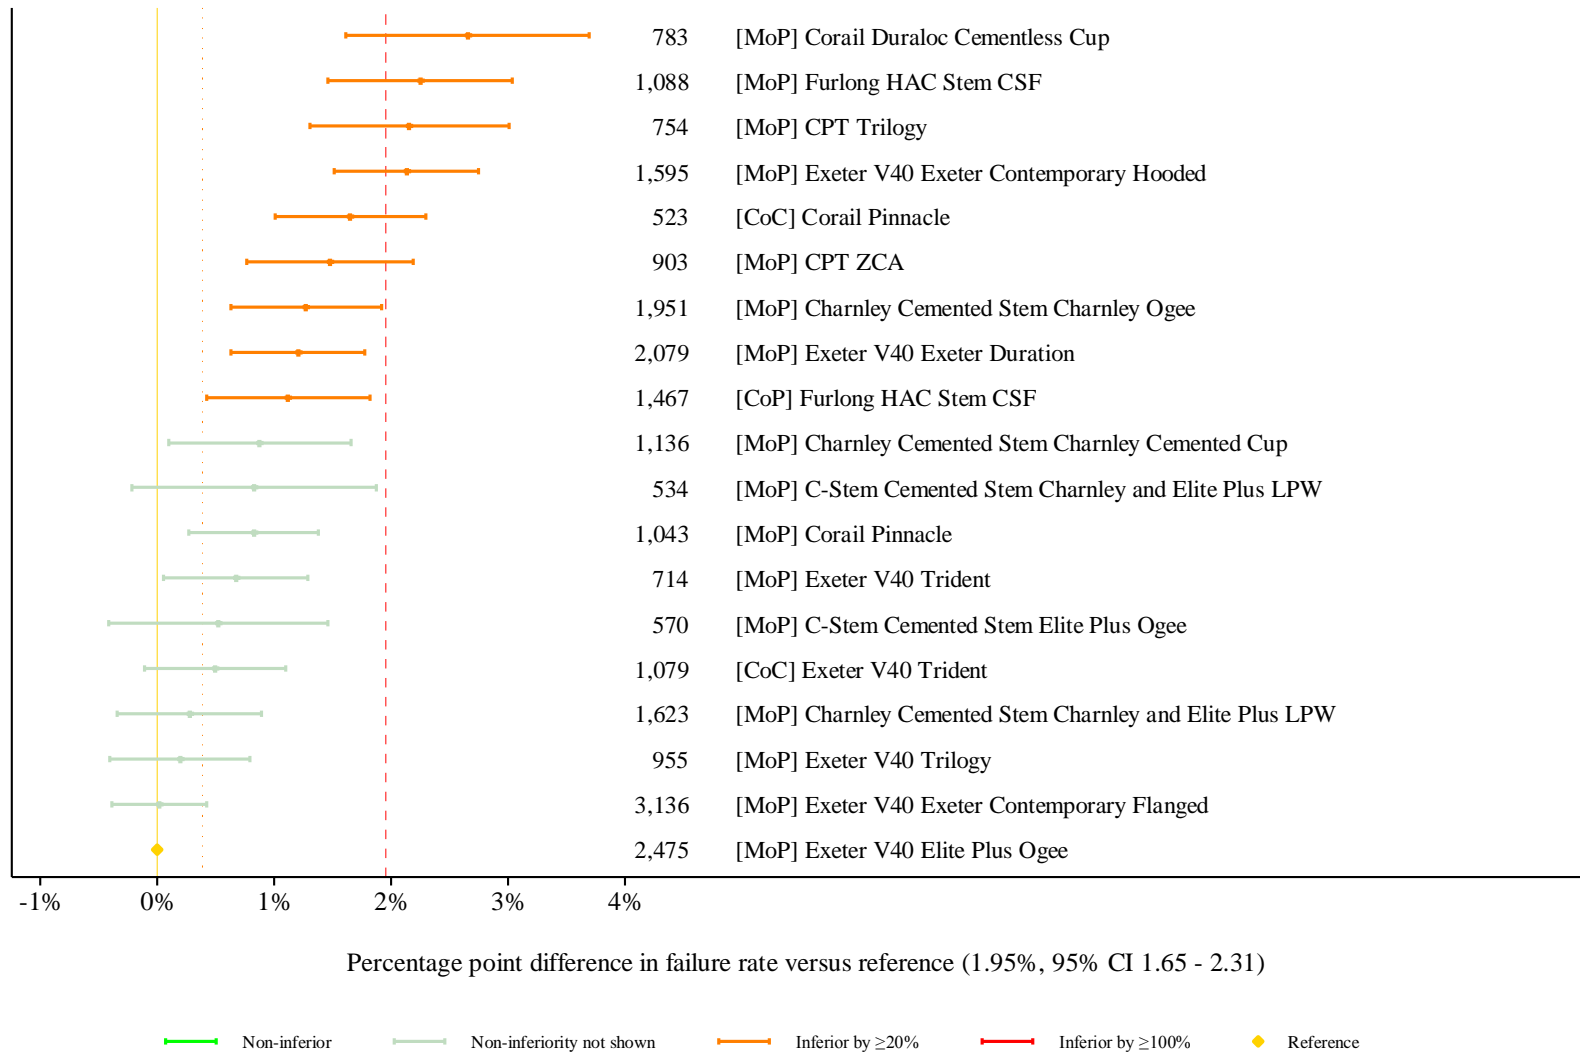

**Supplementary Figure 9b: Difference in failure of implanted constructs compared to a contemporary reference at 10 years in women between 55 and 75 years, using all stem-cup combinations with  $\geq 500$  procedures remaining at risk**

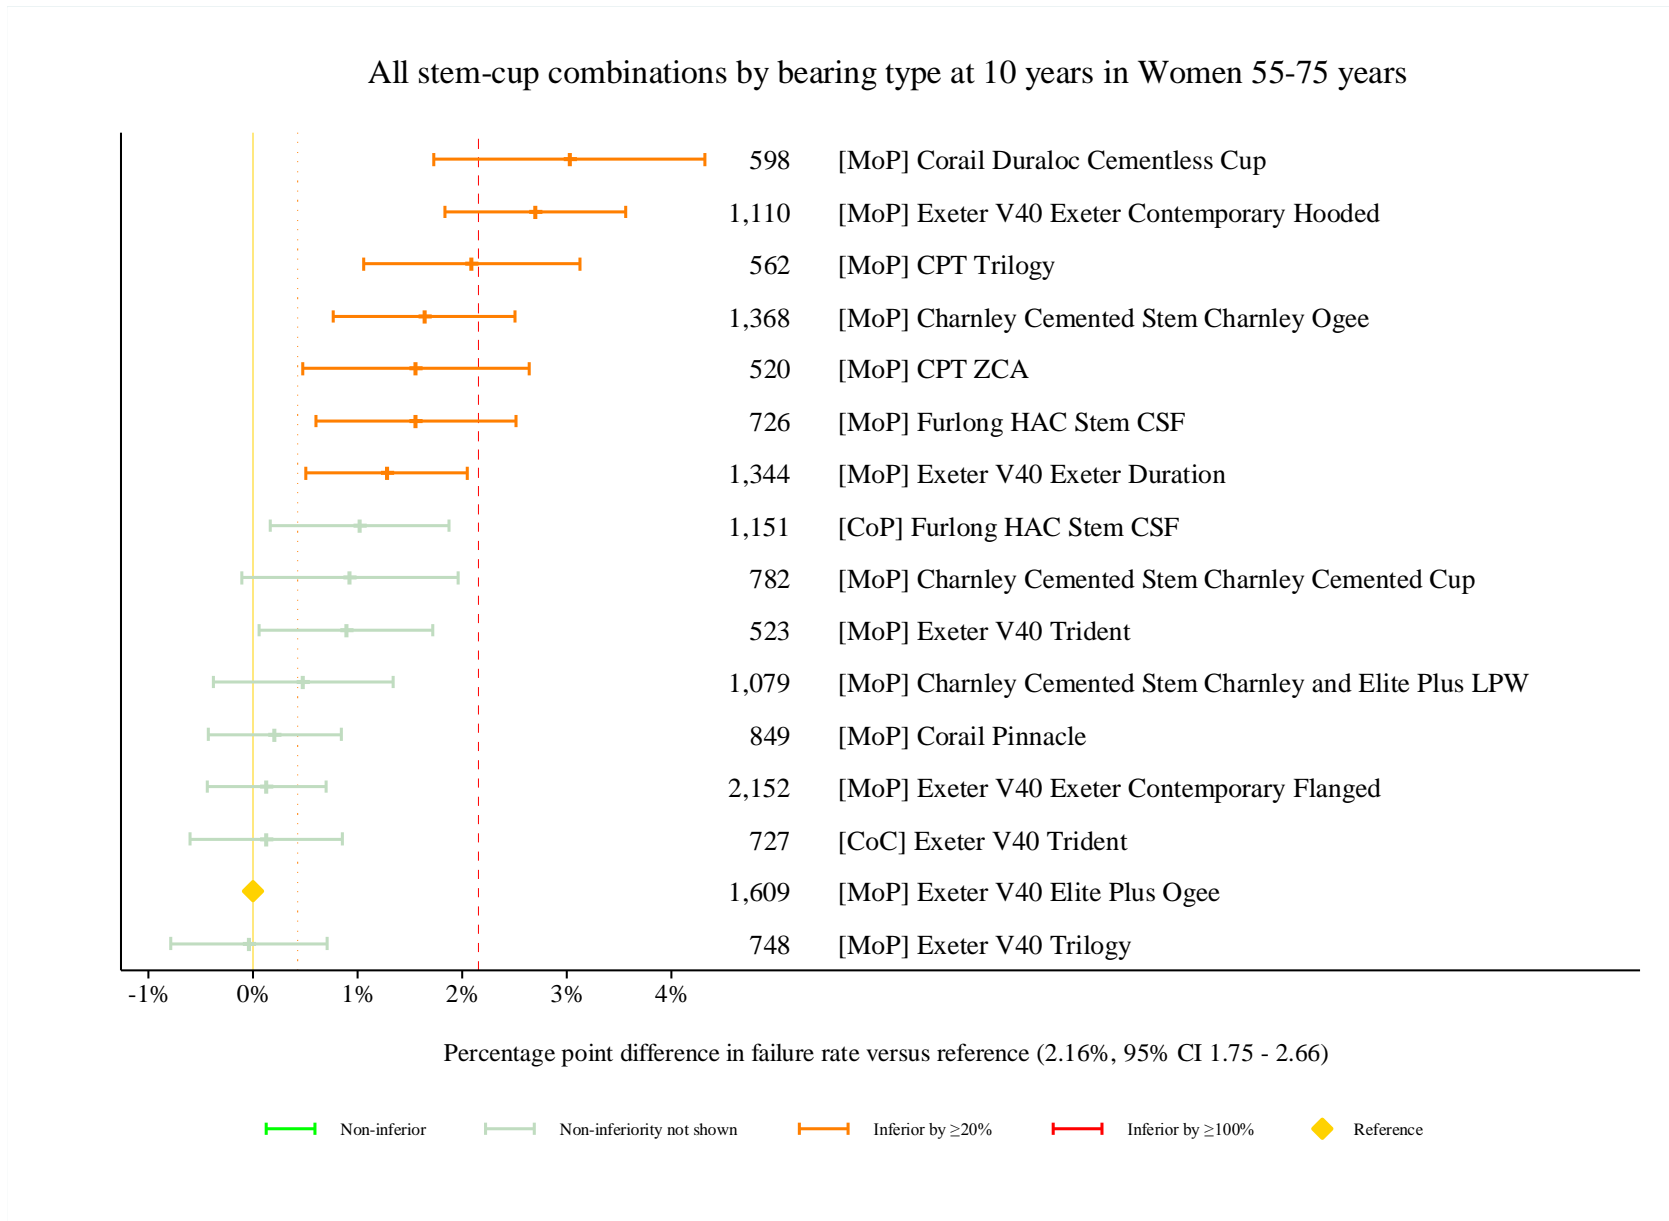

**Supplementary table 1a: Difference in Kaplan-Meier failure estimate between a contemporary reference and implants with at least 250 at risk at 3 years since primary**

| Stem/cup brand                                                | Number at risk | Cumulative failure (%) | Difference in failure (%) | 95% CI         | Equivalence status        | p-value |
|---------------------------------------------------------------|----------------|------------------------|---------------------------|----------------|---------------------------|---------|
| [CoP] MS-30 Original ME Muller Low Profile Cup                | 1,554          | 0.39                   | [REFERENCE]               |                |                           |         |
| [CoC] ABG II Monolithic Cementless Stem ABG II Cementless Cup | 1,061          | 1.82                   | 1.43                      | [ 0.59 , 2.27] | Inferior by $\geq 100\%$  | 0.001   |
| [CoC] ABG II Monolithic Cementless Stem Trident               | 1,007          | 1.98                   | 1.59                      | [ 0.70 , 2.48] | Inferior by $\geq 100\%$  | <0.001  |
| [CoC] AMIStem-H Versafit CC Trio                              | 331            | 2.00                   | 1.61                      | [ 0.44 , 2.77] | Inferior by $\geq 100\%$  | 0.007   |
| [CoC] Accolade Trident                                        | 6,660          | 2.03                   | 1.64                      | [ 1.20 , 2.08] | Inferior by $\geq 100\%$  | <0.001  |
| [CoC] Anthology R3 Cementless                                 | 327            | 1.13                   | 0.74                      | [-0.24 , 1.72] | Non-inferiority not shown | 0.140   |
| [CoC] Bicontact Cementless Stem Plasmacup SC                  | 346            | 1.01                   | 0.62                      | [-0.41 , 1.65] | Non-inferiority not shown | 0.237   |
| [CoC] Bimetric Cementless Stem Exceed ABT                     | 888            | 1.05                   | 0.65                      | [-0.03 , 1.34] | Non-inferiority not shown | 0.059   |
| [CoC] C-Stem AMT Cemented Stem Pinnacle                       | 770            | 0.83                   | 0.44                      | [-0.18 , 1.06] | Non-inferiority not shown | 0.168   |
| [CoC] C-Stem Cemented Stem Pinnacle                           | 342            | 0.54                   | 0.15                      | [-0.65 , 0.95] | Non-inferiority not shown | 0.715   |
| [CoC] CPT Continuum                                           | 801            | 1.71                   | 1.32                      | [ 0.52 , 2.13] | Inferior by $\geq 100\%$  | 0.001   |
| [CoC] CPT Trilogy AB                                          | 525            | 1.12                   | 0.73                      | [-0.21 , 1.67] | Non-inferiority not shown | 0.127   |
| [CoC] CPT Trilogy IT                                          | 314            | 1.14                   | 0.74                      | [-0.13 , 1.62] | Non-inferiority not shown | 0.095   |
| [CoC] Charnley Modular Trilogy AB                             | 252            | 0.39                   | 0.00                      | [-0.82 , 0.81] | Non-inferiority not shown | 0.996   |
| [CoC] Corail Delta TT                                         | 726            | 2.10                   | 1.71                      | [ 0.82 , 2.60] | Inferior by $\geq 100\%$  | <0.001  |
| [CoC] Corail DeltaMotion                                      | 1,147          | 1.40                   | 1.01                      | [ 0.32 , 1.70] | Inferior by $\geq 20\%$   | 0.004   |
| [CoC] Corail Duraloc Option                                   | 1,042          | 1.95                   | 1.56                      | [ 0.68 , 2.43] | Inferior by $\geq 100\%$  | <0.001  |
| [CoC] Corail Pinnacle                                         | 27,047         | 1.79                   | 1.40                      | [ 1.07 , 1.72] | Inferior by $\geq 100\%$  | <0.001  |
| [CoC] Corail Pinnacle Gription                                | 452            | 2.41                   | 2.02                      | [ 0.97 , 3.07] | Inferior by $\geq 100\%$  | <0.001  |
| [CoC] Corail Trinity                                          | 431            | 0.65                   | 0.26                      | [-0.38 , 0.89] | Non-inferiority not shown | 0.430   |
| [CoC] Excia Cementless Plasmacup SC                           | 888            | 1.20                   | 0.81                      | [ 0.12 , 1.50] | Inferior by $\geq 20\%$   | 0.022   |
| [CoC] Exeter V40 ABG II Cementless Cup                        | 1,343          | 0.64                   | 0.25                      | [-0.24 , 0.75] | Non-inferiority not shown | 0.315   |
| [CoC] Exeter V40 Trident                                      | 10,273         | 1.01                   | 0.62                      | [ 0.27 , 0.96] | Inferior by $\geq 20\%$   | <0.001  |
| [CoC] Furlong Evolution Cementless Furlong HAC CSF Plus       | 597            | 1.37                   | 0.98                      | [ 0.36 , 1.60] | Inferior by $\geq 20\%$   | 0.002   |
| [CoC] Furlong HAC Stem CSF                                    | 1,568          | 2.08                   | 1.69                      | [ 0.94 , 2.44] | Inferior by $\geq 100\%$  | <0.001  |
| [CoC] Furlong HAC Stem Furlong HAC CSF Plus                   | 8,977          | 1.59                   | 1.20                      | [ 0.83 , 1.57] | Inferior by $\geq 100\%$  | <0.001  |
| [CoC] Furlong HAC Stem Furlong Threaded                       | 323            | 2.10                   | 1.71                      | [ 0.14 , 3.28] | Inferior by $\geq 20\%$   | 0.033   |
| [CoC] M/L Taper Cementless Continuum                          | 1,393          | 1.63                   | 1.24                      | [ 0.60 , 1.88] | Inferior by $\geq 100\%$  | <0.001  |
| [CoC] M/L Taper Cementless Trilogy IT                         | 257            | 2.94                   | 2.55                      | [ 0.93 , 4.18] | Inferior by $\geq 100\%$  | 0.002   |
| [CoC] M/L Taper Kinectiv Cementless Continuum                 | 258            | 3.39                   | 3.00                      | [ 0.91 , 5.08] | Inferior by $\geq 100\%$  | 0.005   |
| [CoC] Metafix Stem Trinity                                    | 813            | 1.29                   | 0.90                      | [ 0.24 , 1.55] | Inferior by $\geq 20\%$   | 0.007   |
| [CoC] Omnifit Cementless Stem Trident                         | 486            | 1.99                   | 1.60                      | [ 0.34 , 2.85] | Inferior by $\geq 20\%$   | 0.013   |
| [CoC] Polarstem Cementless R3 Cementless                      | 800            | 0.78                   | 0.39                      | [-0.20 , 0.97] | Non-inferiority not shown | 0.195   |
| [CoC] S-Rom Cementless Stem Pinnacle                          | 543            | 3.12                   | 2.73                      | [ 1.38 , 4.08] | Inferior by $\geq 100\%$  | <0.001  |
| [CoC] SL-Plus Cementless Stem EP-Fit Plus                     | 1,202          | 3.46                   | 3.07                      | [ 2.03 , 4.12] | Inferior by $\geq 100\%$  | <0.001  |
| [CoC] SL-Plus Cementless Stem R3 Cementless                   | 539            | 0.80                   | 0.41                      | [-0.35 , 1.16] | Non-inferiority not shown | 0.292   |
| [CoC] SPS Modular April - Ceramic                             | 593            | 1.50                   | 1.11                      | [ 0.14 , 2.07] | Inferior by $\geq 20\%$   | 0.025   |
| [CoC] Summit Cementless Stem Pinnacle                         | 482            | 1.33                   | 0.94                      | [ 0.02 , 1.87] | Non-inferiority not shown | 0.046   |
| [CoC] Synergy Cementless Stem R3 Cementless                   | 280            | 0.96                   | 0.57                      | [-0.41 , 1.54] | Non-inferiority not shown | 0.257   |

|                                                               |       |      |       |                |                           |        |
|---------------------------------------------------------------|-------|------|-------|----------------|---------------------------|--------|
| [CoC] Taperloc Cementless Stem Exceed ABT                     | 6,704 | 1.52 | 1.13  | [ 0.75 , 1.51] | Inferior by $\geq 100\%$  | <0.001 |
| [CoC] Trilock BPS Pinnacle                                    | 341   | 2.06 | 1.67  | [ 0.36 , 2.98] | Inferior by $\geq 20\%$   | 0.012  |
| [CoC] miniHip Trinity                                         | 713   | 1.91 | 1.52  | [ 0.64 , 2.41] | Inferior by $\geq 100\%$  | 0.001  |
| [CoP] Accolade Trident                                        | 3,079 | 1.52 | 1.12  | [ 0.67 , 1.58] | Inferior by $\geq 100\%$  | <0.001 |
| [CoP] C-Stem AMT Cemented Stem Marathon                       | 321   | 0.80 | 0.41  | [-0.34 , 1.15] | Non-inferiority not shown | 0.285  |
| [CoP] C-Stem AMT Cemented Stem Pinnacle                       | 346   | 1.63 | 1.24  | [ 0.36 , 2.12] | Inferior by $\geq 20\%$   | 0.006  |
| [CoP] C-Stem Cemented Stem Elite Plus Ogee                    | 607   | 0.57 | 0.18  | [-0.45 , 0.80] | Non-inferiority not shown | 0.583  |
| [CoP] C-Stem Cemented Stem Marathon                           | 1,150 | 1.03 | 0.64  | [ 0.10 , 1.19] | Inferior by $\geq 20\%$   | 0.021  |
| [CoP] C-Stem Cemented Stem Opera                              | 785   | 0.63 | 0.23  | [-0.38 , 0.85] | Non-inferiority not shown | 0.457  |
| [CoP] C-Stem Cemented Stem Wroblewski Golf Ball               | 913   | 0.69 | 0.30  | [-0.29 , 0.88] | Non-inferiority not shown | 0.320  |
| [CoP] CLS Cementless Stem Trilogy                             | 283   | 0.59 | 0.20  | [-0.67 , 1.06] | Non-inferiority not shown | 0.656  |
| [CoP] CPT Trilogy                                             | 1,321 | 1.47 | 1.08  | [ 0.59 , 1.58] | Inferior by $\geq 100\%$  | <0.001 |
| [CoP] CPT ZCA                                                 | 349   | 0.39 | -0.01 | [-0.62 , 0.61] | Non-inferiority not shown | 0.987  |
| [CoP] Corail Charnley and Elite Plus LPW                      | 627   | 1.72 | 1.33  | [ 0.32 , 2.34] | Inferior by $\geq 20\%$   | 0.010  |
| [CoP] Corail Duraloc Cementless Cup                           | 301   | 4.40 | 4.01  | [ 1.74 , 6.28] | Inferior by $\geq 100\%$  | 0.001  |
| [CoP] Corail Elite Plus Cemented Cup                          | 409   | 0.95 | 0.56  | [-0.32 , 1.43] | Non-inferiority not shown | 0.214  |
| [CoP] Corail Elite Plus Ogee                                  | 464   | 1.70 | 1.31  | [ 0.17 , 2.46] | Inferior by $\geq 20\%$   | 0.024  |
| [CoP] Corail Marathon                                         | 1,309 | 1.12 | 0.73  | [ 0.20 , 1.26] | Inferior by $\geq 20\%$   | 0.007  |
| [CoP] Corail Pinnacle                                         | 8,130 | 1.21 | 0.82  | [ 0.48 , 1.16] | Inferior by $\geq 100\%$  | <0.001 |
| [CoP] Corail Trabecular Metal Modular Cementless Cup          | 335   | 2.76 | 2.36  | [ 0.85 , 3.88] | Inferior by $\geq 100\%$  | 0.002  |
| [CoP] Corail Trident                                          | 300   | 0.26 | -0.13 | [-0.72 , 0.45] | Non-inferiority not shown | 0.660  |
| [CoP] Corail Trilogy                                          | 654   | 1.31 | 0.92  | [ 0.02 , 1.81] | Non-inferiority not shown | 0.045  |
| [CoP] Excia Cementless Plasmacup SC                           | 301   | 0.96 | 0.57  | [-0.32 , 1.47] | Non-inferiority not shown | 0.210  |
| [CoP] Exeter V40 Charnley and Elite Plus LPW                  | 674   | 1.59 | 1.20  | [ 0.32 , 2.07] | Inferior by $\geq 20\%$   | 0.008  |
| [CoP] Exeter V40 Elite Plus Ogee                              | 1,190 | 0.70 | 0.31  | [-0.20 , 0.81] | Non-inferiority not shown | 0.231  |
| [CoP] Exeter V40 Exeter Contemporary Flanged                  | 2,995 | 0.99 | 0.60  | [ 0.18 , 1.03] | Inferior by $\geq 20\%$   | 0.005  |
| [CoP] Exeter V40 Exeter Contemporary Hooded                   | 779   | 2.03 | 1.64  | [ 0.70 , 2.57] | Inferior by $\geq 100\%$  | 0.001  |
| [CoP] Exeter V40 Exeter Duration                              | 775   | 0.66 | 0.27  | [-0.33 , 0.88] | Non-inferiority not shown | 0.378  |
| [CoP] Exeter V40 Exeter X3 Rimfit                             | 2,175 | 0.99 | 0.60  | [ 0.18 , 1.02] | Inferior by $\geq 20\%$   | 0.005  |
| [CoP] Exeter V40 Marathon                                     | 485   | 0.70 | 0.31  | [-0.34 , 0.96] | Non-inferiority not shown | 0.349  |
| [CoP] Exeter V40 Pinnacle                                     | 542   | 1.14 | 0.75  | [ 0.07 , 1.42] | Non-inferiority not shown | 0.030  |
| [CoP] Exeter V40 Trident                                      | 4,857 | 0.88 | 0.48  | [ 0.14 , 0.83] | Inferior by $\geq 20\%$   | 0.006  |
| [CoP] Exeter V40 Trilogy                                      | 1,945 | 1.05 | 0.66  | [ 0.14 , 1.17] | Inferior by $\geq 20\%$   | 0.013  |
| [CoP] Exeter V40 Tritanium                                    | 437   | 1.91 | 1.52  | [ 0.60 , 2.45] | Inferior by $\geq 100\%$  | 0.001  |
| [CoP] Furlong HAC Stem CSF                                    | 6,284 | 1.26 | 0.87  | [ 0.48 , 1.26] | Inferior by $\geq 100\%$  | <0.001 |
| [CoP] Furlong HAC Stem Furlong HAC CSF Plus                   | 1,538 | 1.84 | 1.45  | [ 0.81 , 2.09] | Inferior by $\geq 100\%$  | <0.001 |
| [CoP] Furlong HAC Stem Furlong Threaded                       | 388   | 0.50 | 0.11  | [-0.64 , 0.86] | Non-inferiority not shown | 0.778  |
| [CoP] M/L Taper Cementless Continuum                          | 391   | 2.79 | 2.40  | [ 1.26 , 3.53] | Inferior by $\geq 100\%$  | <0.001 |
| [CoP] Muller Straight Stem Original ME Muller Low Profile Cup | 364   | 1.22 | 0.83  | [-0.19 , 1.85] | Non-inferiority not shown | 0.110  |
| [CoP] SL-Plus Cementless Stem Bicon-Plus                      | 620   | 2.56 | 2.17  | [ 0.93 , 3.40] | Inferior by $\geq 100\%$  | 0.001  |
| [CoP] SL-Plus Cementless Stem EP-Fit Plus                     | 958   | 1.89 | 1.50  | [ 0.61 , 2.39] | Inferior by $\geq 100\%$  | 0.001  |
| [CoP] SP II Cemented Stem Interplanta                         | 310   | 0.00 | --    | [ -- , -- ]    | No failures to date       |        |
| [CoP] Stanmore Modular Stem Stanmore-Arcom Cup                | 355   | 1.19 | 0.80  | [-0.28 , 1.88] | Non-inferiority not shown | 0.145  |
| [CoP] Taperloc Cementless Stem Exceed ABT                     | 1,879 | 1.07 | 0.68  | [ 0.23 , 1.13] | Inferior by $\geq 20\%$   | 0.003  |
| [CoP] Versys Cementless Stem Trilogy                          | 363   | 1.07 | 0.68  | [-0.40 , 1.76] | Non-inferiority not shown | 0.220  |
| [MoP] ABG II Monolithic Cementless Stem ABG II Cementless Cup | 442   | 1.70 | 1.31  | [ 0.10 , 2.51] | Inferior by $\geq 20\%$   | 0.033  |

|                                                            |       |      |       |                |                           |        |
|------------------------------------------------------------|-------|------|-------|----------------|---------------------------|--------|
| [MoP] ABG II Monolithic Cementless Stem Trident            | 440   | 3.19 | 2.80  | [ 1.18 , 4.42] | Inferior by $\geq 100\%$  | 0.001  |
| [MoP] Accolade Trident                                     | 9,084 | 2.01 | 1.62  | [ 1.23 , 2.02] | Inferior by $\geq 100\%$  | <0.001 |
| [MoP] Anthology R3 Cementless                              | 1,155 | 1.76 | 1.36  | [ 0.73 , 2.00] | Inferior by $\geq 100\%$  | <0.001 |
| [MoP] Bimetric Cementless Stem Mallory-Head Cementless Cup | 359   | 2.05 | 1.66  | [ 0.42 , 2.90] | Inferior by $\geq 100\%$  | 0.009  |
| [MoP] C-Stem AMT Cemented Stem Charnley and Elite Plus LPW | 2,153 | 1.15 | 0.76  | [ 0.26 , 1.26] | Inferior by $\geq 20\%$   | 0.003  |
| [MoP] C-Stem AMT Cemented Stem Elite Plus Cemented Cup     | 612   | 0.88 | 0.48  | [-0.27 , 1.24] | Non-inferiority not shown | 0.209  |
| [MoP] C-Stem AMT Cemented Stem Elite Plus Ogee             | 1,608 | 0.77 | 0.38  | [-0.09 , 0.85] | Non-inferiority not shown | 0.116  |
| [MoP] C-Stem AMT Cemented Stem Marathon                    | 1,157 | 0.93 | 0.54  | [ 0.07 , 1.00] | Non-inferiority not shown | 0.023  |
| [MoP] C-Stem AMT Cemented Stem Pinnacle                    | 1,478 | 1.22 | 0.83  | [ 0.35 , 1.31] | Inferior by $\geq 20\%$   | 0.001  |
| [MoP] C-Stem Cemented Stem Charnley Ogee                   | 847   | 1.31 | 0.92  | [ 0.15 , 1.68] | Inferior by $\geq 20\%$   | 0.019  |
| [MoP] C-Stem Cemented Stem Charnley and Elite Plus LPW     | 1,594 | 1.05 | 0.66  | [ 0.10 , 1.23] | Inferior by $\geq 20\%$   | 0.022  |
| [MoP] C-Stem Cemented Stem Duraloc Cementless Cup          | 535   | 2.10 | 1.71  | [ 0.50 , 2.92] | Inferior by $\geq 100\%$  | 0.006  |
| [MoP] C-Stem Cemented Stem Elite Plus Cemented Cup         | 650   | 0.56 | 0.17  | [-0.45 , 0.79] | Non-inferiority not shown | 0.590  |
| [MoP] C-Stem Cemented Stem Elite Plus Ogee                 | 3,208 | 0.88 | 0.49  | [ 0.07 , 0.91] | Non-inferiority not shown | 0.022  |
| [MoP] C-Stem Cemented Stem Marathon                        | 1,556 | 0.92 | 0.53  | [ 0.05 , 1.00] | Non-inferiority not shown | 0.029  |
| [MoP] C-Stem Cemented Stem Opera                           | 1,363 | 1.04 | 0.65  | [ 0.05 , 1.25] | Non-inferiority not shown | 0.033  |
| [MoP] C-Stem Cemented Stem Pinnacle                        | 417   | 1.56 | 1.17  | [ 0.06 , 2.28] | Non-inferiority not shown | 0.039  |
| [MoP] C-Stem Cemented Stem Polarcup Cementless             | 268   | 0.71 | 0.32  | [-0.70 , 1.35] | Non-inferiority not shown | 0.539  |
| [MoP] C-Stem Cemented Stem Trilogy                         | 364   | 0.53 | 0.14  | [-0.65 , 0.93] | Non-inferiority not shown | 0.730  |
| [MoP] C-Stem Cemented Stem Wroblewski Golf Ball            | 978   | 0.94 | 0.55  | [-0.10 , 1.20] | Non-inferiority not shown | 0.098  |
| [MoP] CCA Cemented Stem CCB Cup                            | 1,129 | 0.57 | 0.18  | [-0.31 , 0.68] | Non-inferiority not shown | 0.469  |
| [MoP] CLS Cementless Stem Allofit                          | 600   | 2.56 | 2.17  | [ 0.93 , 3.40] | Inferior by $\geq 100\%$  | 0.001  |
| [MoP] CLS Cementless Stem Trilogy                          | 559   | 2.80 | 2.40  | [ 1.06 , 3.75] | Inferior by $\geq 100\%$  | <0.001 |
| [MoP] CMK Modular Cemented Stem CMK Cemented Cup           | 462   | 0.41 | 0.02  | [-0.62 , 0.67] | Non-inferiority not shown | 0.943  |
| [MoP] CPCS Opera                                           | 1,174 | 0.82 | 0.42  | [-0.16 , 1.01] | Non-inferiority not shown | 0.152  |
| [MoP] CPCS Polarcup Cementless                             | 400   | 0.49 | 0.09  | [-0.64 , 0.83] | Non-inferiority not shown | 0.801  |
| [MoP] CPCS Reflection Cemented                             | 382   | 1.02 | 0.63  | [-0.14 , 1.40] | Non-inferiority not shown | 0.107  |
| [MoP] CPS Plus Cenator Cemented Cup                        | 381   | 0.26 | -0.13 | [-0.72 , 0.46] | Non-inferiority not shown | 0.662  |
| [MoP] CPS Plus EP-Fit Plus                                 | 301   | 1.58 | 1.19  | [-0.21 , 2.60] | Non-inferiority not shown | 0.097  |
| [MoP] CPS Plus Opera                                       | 490   | 1.55 | 1.16  | [ 0.05 , 2.27] | Non-inferiority not shown | 0.040  |
| [MoP] CPT Allofit                                          | 686   | 0.55 | 0.16  | [-0.38 , 0.69] | Non-inferiority not shown | 0.561  |
| [MoP] CPT Continuum                                        | 480   | 2.60 | 2.20  | [ 1.33 , 3.08] | Inferior by $\geq 100\%$  | <0.001 |
| [MoP] CPT Elite Plus Ogee                                  | 2,410 | 1.38 | 0.99  | [ 0.47 , 1.52] | Inferior by $\geq 100\%$  | <0.001 |
| [MoP] CPT Exceed                                           | 284   | 3.02 | 2.63  | [ 0.66 , 4.59] | Inferior by $\geq 100\%$  | 0.009  |
| [MoP] CPT Exeter Contemporary Flanged                      | 386   | 2.10 | 1.71  | [ 0.50 , 2.92] | Inferior by $\geq 100\%$  | 0.006  |
| [MoP] CPT Opera                                            | 406   | 1.40 | 1.01  | [-0.14 , 2.16] | Non-inferiority not shown | 0.086  |
| [MoP] CPT Original ME Muller Low Profile Cup               | 833   | 1.20 | 0.81  | [ 0.09 , 1.53] | Inferior by $\geq 20\%$   | 0.028  |
| [MoP] CPT Pinnacle                                         | 753   | 1.70 | 1.31  | [ 0.38 , 2.24] | Inferior by $\geq 20\%$   | 0.006  |
| [MoP] CPT Trabecular Metal Modular Cementless Cup          | 891   | 1.66 | 1.27  | [ 0.50 , 2.03] | Inferior by $\geq 100\%$  | 0.001  |
| [MoP] CPT Trilogy                                          | 8,372 | 1.37 | 0.98  | [ 0.62 , 1.34] | Inferior by $\geq 100\%$  | <0.001 |
| [MoP] CPT Trilogy IT                                       | 450   | 2.89 | 2.50  | [ 1.61 , 3.40] | Inferior by $\geq 100\%$  | <0.001 |
| [MoP] CPT ZCA                                              | 7,529 | 1.39 | 1.00  | [ 0.63 , 1.37] | Inferior by $\geq 100\%$  | <0.001 |
| [MoP] Centrament Chirulen                                  | 378   | 0.24 | -0.15 | [-0.71 , 0.41] | Non-inferiority not shown | 0.608  |
| [MoP] Charnley Cemented Stem Charnley Cemented Cup         | 4,078 | 1.11 | 0.71  | [ 0.29 , 1.14] | Inferior by $\geq 20\%$   | 0.001  |
| [MoP] Charnley Cemented Stem Charnley Ogee                 | 8,701 | 1.18 | 0.79  | [ 0.43 , 1.15] | Inferior by $\geq 100\%$  | <0.001 |
| [MoP] Charnley Cemented Stem Charnley and Elite Plus LPW   | 5,770 | 0.72 | 0.32  | [-0.03 , 0.68] | Non-inferiority not shown | 0.075  |

|                                                            |        |      |       |                |                           |        |
|------------------------------------------------------------|--------|------|-------|----------------|---------------------------|--------|
| [MoP] Charnley Cemented Stem Opera                         | 1,229  | 0.85 | 0.46  | [-0.12 , 1.04] | Non-inferiority not shown | 0.119  |
| [MoP] Charnley Cemented Stem Wroblewski Golf Ball          | 990    | 1.50 | 1.10  | [ 0.32 , 1.89] | Inferior by $\geq 20\%$   | 0.006  |
| [MoP] Charnley Modular Charnley and Elite Plus LPW         | 363    | 0.27 | -0.12 | [-0.73 , 0.49] | Non-inferiority not shown | 0.702  |
| [MoP] Corail Charnley and Elite Plus LPW                   | 723    | 1.36 | 0.97  | [ 0.18 , 1.76] | Inferior by $\geq 20\%$   | 0.017  |
| [MoP] Corail Duraloc Cementless Cup                        | 3,449  | 1.41 | 1.02  | [ 0.54 , 1.50] | Inferior by $\geq 100\%$  | <0.001 |
| [MoP] Corail Elite Plus Cemented Cup                       | 964    | 0.81 | 0.42  | [-0.19 , 1.02] | Non-inferiority not shown | 0.175  |
| [MoP] Corail Elite Plus Ogee                               | 1,407  | 1.22 | 0.83  | [ 0.24 , 1.42] | Inferior by $\geq 20\%$   | 0.005  |
| [MoP] Corail Exeter Contemporary Flanged                   | 571    | 1.13 | 0.73  | [-0.06 , 1.53] | Non-inferiority not shown | 0.070  |
| [MoP] Corail Marathon                                      | 2,848  | 1.05 | 0.66  | [ 0.24 , 1.07] | Inferior by $\geq 20\%$   | 0.002  |
| [MoP] Corail Pinnacle                                      | 28,253 | 1.37 | 0.98  | [ 0.67 , 1.29] | Inferior by $\geq 100\%$  | <0.001 |
| [MoP] Corail Pinnacle Gription                             | 382    | 1.54 | 1.15  | [ 0.34 , 1.95] | Inferior by $\geq 20\%$   | 0.005  |
| [MoP] Corail Trident                                       | 585    | 1.54 | 1.15  | [ 0.33 , 1.96] | Inferior by $\geq 20\%$   | 0.006  |
| [MoP] Corail Trilogy                                       | 1,791  | 1.14 | 0.74  | [ 0.20 , 1.29] | Inferior by $\geq 20\%$   | 0.007  |
| [MoP] Elite Plus Cemented Stem Charnley and Elite Plus LPW | 331    | 1.66 | 1.27  | [-0.08 , 2.62] | Non-inferiority not shown | 0.065  |
| [MoP] Elite Plus Cemented Stem Elite Plus Ogee             | 576    | 0.34 | -0.05 | [-0.60 , 0.50] | Non-inferiority not shown | 0.848  |
| [MoP] Excia Cementless Plasmacup SC                        | 316    | 3.20 | 2.81  | [ 1.00 , 4.62] | Inferior by $\geq 100\%$  | 0.002  |
| [MoP] Exeter Elite Plus Ogee                               | 282    | 0.33 | -0.06 | [-0.77 , 0.65] | Non-inferiority not shown | 0.871  |
| [MoP] Exeter V40 ABG II Cementless Cup                     | 734    | 1.28 | 0.89  | [ 0.05 , 1.73] | Non-inferiority not shown | 0.038  |
| [MoP] Exeter V40 Cenator Cemented Cup                      | 2,129  | 1.40 | 1.01  | [ 0.45 , 1.57] | Inferior by $\geq 100\%$  | <0.001 |
| [MoP] Exeter V40 Charnley Cemented Cup                     | 314    | 0.87 | 0.48  | [-0.55 , 1.51] | Non-inferiority not shown | 0.358  |
| [MoP] Exeter V40 Charnley Ogee                             | 1,315  | 0.95 | 0.56  | [-0.02 , 1.14] | Non-inferiority not shown | 0.057  |
| [MoP] Exeter V40 Charnley and Elite Plus LPW               | 2,477  | 1.25 | 0.86  | [ 0.37 , 1.35] | Inferior by $\geq 20\%$   | 0.001  |
| [MoP] Exeter V40 Duraloc Cementless Cup                    | 1,061  | 1.46 | 1.06  | [ 0.30 , 1.83] | Inferior by $\geq 20\%$   | 0.006  |
| [MoP] Exeter V40 EP-Fit Plus                               | 539    | 1.44 | 1.05  | [ 0.02 , 2.08] | Non-inferiority not shown | 0.046  |
| [MoP] Exeter V40 Elite Plus Cemented Cup                   | 3,599  | 0.58 | 0.19  | [-0.18 , 0.56] | Non-inferiority not shown | 0.314  |
| [MoP] Exeter V40 Elite Plus Ogee                           | 16,477 | 0.79 | 0.40  | [ 0.08 , 0.71] | Inferior by $\geq 20\%$   | 0.014  |
| [MoP] Exeter V40 Exceed                                    | 494    | 0.94 | 0.55  | [-0.32 , 1.42] | Non-inferiority not shown | 0.215  |
| [MoP] Exeter V40 Exceed ABT                                | 456    | 0.60 | 0.21  | [-0.45 , 0.87] | Non-inferiority not shown | 0.528  |
| [MoP] Exeter V40 Exeter Contemporary Flanged               | 40,794 | 0.85 | 0.46  | [ 0.15 , 0.76] | Inferior by $\geq 20\%$   | 0.003  |
| [MoP] Exeter V40 Exeter Contemporary Hooded                | 16,021 | 1.53 | 1.14  | [ 0.80 , 1.47] | Inferior by $\geq 100\%$  | <0.001 |
| [MoP] Exeter V40 Exeter Duration                           | 12,935 | 1.23 | 0.84  | [ 0.50 , 1.18] | Inferior by $\geq 100\%$  | <0.001 |
| [MoP] Exeter V40 Exeter X3 Rimfit                          | 5,262  | 0.96 | 0.57  | [ 0.23 , 0.92] | Inferior by $\geq 20\%$   | 0.001  |
| [MoP] Exeter V40 Furlong HAC CSF Plus                      | 504    | 0.35 | -0.04 | [-0.53 , 0.46] | Non-inferiority not shown | 0.882  |
| [MoP] Exeter V40 Marathon                                  | 1,300  | 1.05 | 0.66  | [ 0.15 , 1.18] | Inferior by $\geq 20\%$   | 0.012  |
| [MoP] Exeter V40 Opera                                     | 2,373  | 0.81 | 0.42  | [-0.03 , 0.88] | Non-inferiority not shown | 0.067  |
| [MoP] Exeter V40 Pinnacle                                  | 2,590  | 1.18 | 0.79  | [ 0.35 , 1.24] | Inferior by $\geq 20\%$   | <0.001 |
| [MoP] Exeter V40 R3 Cementless                             | 461    | 1.23 | 0.84  | [ 0.10 , 1.57] | Inferior by $\geq 20\%$   | 0.025  |
| [MoP] Exeter V40 Reflection Cementless                     | 2,035  | 1.12 | 0.73  | [ 0.19 , 1.26] | Inferior by $\geq 20\%$   | 0.007  |
| [MoP] Exeter V40 Trabecular Metal Modular Cementless Cup   | 411    | 1.22 | 0.83  | [-0.12 , 1.77] | Non-inferiority not shown | 0.086  |
| [MoP] Exeter V40 Trabecular Metal Natural Cup              | 318    | 3.43 | 3.04  | [ 1.11 , 4.97] | Inferior by $\geq 100\%$  | 0.002  |
| [MoP] Exeter V40 Trident                                   | 17,802 | 1.10 | 0.71  | [ 0.39 , 1.02] | Inferior by $\geq 20\%$   | <0.001 |
| [MoP] Exeter V40 Trilogy                                   | 8,482  | 0.92 | 0.53  | [ 0.19 , 0.88] | Inferior by $\geq 20\%$   | 0.003  |
| [MoP] Exeter V40 Tritanium                                 | 475    | 2.06 | 1.67  | [ 0.71 , 2.63] | Inferior by $\geq 100\%$  | 0.001  |
| [MoP] Exeter V40 Ultima Cemented Cup                       | 1,139  | 1.56 | 1.17  | [ 0.41 , 1.92] | Inferior by $\geq 100\%$  | 0.002  |
| [MoP] Exeter V40 ZCA                                       | 274    | 0.36 | -0.03 | [-0.79 , 0.73] | Non-inferiority not shown | 0.933  |
| [MoP] Furlong Cemented Stem JRI Cemented Cup               | 1,478  | 1.38 | 0.99  | [ 0.34 , 1.63] | Inferior by $\geq 20\%$   | 0.003  |



|                                                               |       |      |       |                |                           |        |
|---------------------------------------------------------------|-------|------|-------|----------------|---------------------------|--------|
| [MoP] Furlong HAC Stem CSF                                    | 6,640 | 2.07 | 1.68  | [ 1.25 , 2.11] | Inferior by $\geq 100\%$  | <0.001 |
| [MoP] Furlong HAC Stem Furlong HAC CSF Plus                   | 2,998 | 2.24 | 1.85  | [ 1.33 , 2.37] | Inferior by $\geq 100\%$  | <0.001 |
| [MoP] Furlong HAC Stem Furlong Threaded                       | 479   | 2.13 | 1.74  | [ 0.46 , 3.02] | Inferior by $\geq 100\%$  | 0.008  |
| [MoP] Furlong HAC Stem Trilogy                                | 341   | 1.90 | 1.51  | [ 0.09 , 2.94] | Inferior by $\geq 20\%$   | 0.038  |
| [MoP] M/L Taper Cementless Allofit                            | 543   | 1.27 | 0.88  | [ 0.00 , 1.76] | Non-inferiority not shown | 0.049  |
| [MoP] M/L Taper Cementless Continuum                          | 612   | 1.40 | 1.01  | [ 0.28 , 1.74] | Inferior by $\geq 20\%$   | 0.007  |
| [MoP] M/L Taper Cementless Trilogy                            | 475   | 2.08 | 1.69  | [ 0.63 , 2.74] | Inferior by $\geq 100\%$  | 0.002  |
| [MoP] M/L Taper Cementless Trilogy IT                         | 270   | 1.86 | 1.47  | [ 0.46 , 2.47] | Inferior by $\geq 100\%$  | 0.004  |
| [MoP] MS-30 Allofit                                           | 314   | 0.57 | 0.17  | [-0.66 , 1.01] | Non-inferiority not shown | 0.683  |
| [MoP] MS-30 Original ME Muller Low Profile Cup                | 756   | 0.58 | 0.19  | [-0.36 , 0.74] | Non-inferiority not shown | 0.497  |
| [MoP] Mem Original ME Muller Low Profile Cup                  | 337   | 0.56 | 0.17  | [-0.66 , 1.00] | Non-inferiority not shown | 0.688  |
| [MoP] Muller Straight Stem Centerpulse Muller                 | 502   | 0.95 | 0.56  | [-0.32 , 1.43] | Non-inferiority not shown | 0.213  |
| [MoP] Muller Straight Stem Original ME Muller Low Profile Cup | 1,412 | 0.81 | 0.41  | [-0.09 , 0.92] | Non-inferiority not shown | 0.106  |
| [MoP] Muller-Biomet Apollo                                    | 1,949 | 1.24 | 0.85  | [ 0.30 , 1.41] | Inferior by $\geq 20\%$   | 0.003  |
| [MoP] Muller-Biomet Original ME Muller Low Profile Cup        | 831   | 1.56 | 1.17  | [ 0.31 , 2.03] | Inferior by $\geq 20\%$   | 0.008  |
| [MoP] Omnifit Cemented Stem ODC                               | 880   | 1.40 | 1.01  | [ 0.20 , 1.82] | Inferior by $\geq 20\%$   | 0.015  |
| [MoP] Omnifit Cemented Stem Trident                           | 270   | 0.36 | -0.03 | [-0.80 , 0.74] | Non-inferiority not shown | 0.947  |
| [MoP] Omnifit Cementless Stem Secure Fit Cementless Cup       | 283   | 0.69 | 0.30  | [-0.70 , 1.30] | Non-inferiority not shown | 0.554  |
| [MoP] Omnifit Cementless Stem Trident                         | 426   | 3.34 | 2.95  | [ 1.31 , 4.58] | Inferior by $\geq 100\%$  | <0.001 |
| [MoP] P10 Muller Original ME Muller Low Profile Cup           | 415   | 0.96 | 0.57  | [-0.33 , 1.47] | Non-inferiority not shown | 0.213  |
| [MoP] Polarstem Cementless R3 Cementless                      | 1,068 | 0.96 | 0.57  | [ 0.14 , 1.00] | Inferior by $\geq 20\%$   | 0.010  |
| [MoP] SL-Plus Cementless Stem EP-Fit Plus                     | 2,023 | 2.60 | 2.21  | [ 1.52 , 2.90] | Inferior by $\geq 100\%$  | <0.001 |
| [MoP] SP II Cemented Stem Interplanta                         | 625   | 2.72 | 2.33  | [ 1.09 , 3.57] | Inferior by $\geq 100\%$  | <0.001 |
| [MoP] SP II Cemented Stem Link Flange Cup                     | 274   | 0.69 | 0.29  | [-0.70 , 1.29] | Non-inferiority not shown | 0.560  |
| [MoP] Spectron Reflection Cementless                          | 298   | 1.24 | 0.84  | [-0.39 , 2.08] | Non-inferiority not shown | 0.182  |
| [MoP] Stanmore Modular Stem Elite Plus Cemented Cup           | 534   | 0.35 | -0.05 | [-0.61 , 0.51] | Non-inferiority not shown | 0.872  |
| [MoP] Stanmore Modular Stem SHP Cup                           | 931   | 0.82 | 0.43  | [-0.18 , 1.03] | Non-inferiority not shown | 0.169  |
| [MoP] Stanmore Modular Stem Stanmore-Arcom Cup                | 3,798 | 1.09 | 0.70  | [ 0.27 , 1.12] | Inferior by $\geq 20\%$   | 0.001  |
| [MoP] Synergy Cementless Stem R3 Cementless                   | 1,057 | 1.25 | 0.86  | [ 0.31 , 1.41] | Inferior by $\geq 20\%$   | 0.002  |
| [MoP] Synergy Cementless Stem Reflection Cementless           | 1,449 | 0.87 | 0.47  | [-0.08 , 1.03] | Non-inferiority not shown | 0.092  |
| [MoP] Taperfit Cemented Stem Atlas IIIp                       | 444   | 0.84 | 0.45  | [-0.34 , 1.24] | Non-inferiority not shown | 0.268  |
| [MoP] Taperloc Cemented Stem Exceed ABT                       | 280   | 0.97 | 0.58  | [-0.21 , 1.38] | Non-inferiority not shown | 0.152  |
| [MoP] Taperloc Cementless Stem Exceed                         | 553   | 1.20 | 0.81  | [-0.12 , 1.73] | Non-inferiority not shown | 0.089  |
| [MoP] Taperloc Cementless Stem Exceed ABT                     | 3,732 | 1.75 | 1.36  | [ 0.91 , 1.80] | Inferior by $\geq 100\%$  | <0.001 |
| [MoP] Trilock BPS Pinnacle                                    | 264   | 1.65 | 1.26  | [ 0.01 , 2.51] | Non-inferiority not shown | 0.048  |
| [MoP] Trilock BPS Pinnacle Gription                           | 275   | 1.37 | 0.98  | [-0.19 , 2.15] | Non-inferiority not shown | 0.100  |
| [MoP] VerSys Cemented Stem Trilogy                            | 263   | 1.11 | 0.71  | [-0.56 , 1.99] | Non-inferiority not shown | 0.273  |
| [MoP] Versys Cementless Stem Trilogy                          | 860   | 4.01 | 3.62  | [ 2.32 , 4.91] | Inferior by $\geq 100\%$  | <0.001 |

**Supplementary table 1b: Difference in Kaplan-Meier failure estimate between a contemporary reference and implants with at least 250 at risk at 5 years since primary**

| <b>Stem/cup brand</b>                                         | <b>Number at risk</b> | <b>Cumulative failure (%)</b> | <b>Difference in failure (%)</b> | <b>95% CI</b>  | <b>Equivalence status</b> | <b>p-value</b> |
|---------------------------------------------------------------|-----------------------|-------------------------------|----------------------------------|----------------|---------------------------|----------------|
| [CoP] MS-30 Original ME Muller Low Profile Cup                | 1,125                 | 0.55                          | [REFERENCE]                      |                |                           |                |
| [CoC] ABG II Monolithic Cementless Stem ABG II Cementless Cup | 1,020                 | 2.29                          | 1.73                             | [ 0.77 , 2.70] | Inferior by ≥100%         | <0.001         |
| [CoC] ABG II Monolithic Cementless Stem Trident               | 834                   | 3.07                          | 2.51                             | [ 1.38 , 3.64] | Inferior by ≥100%         | <0.001         |
| [CoC] Accolade Trident                                        | 5,169                 | 2.83                          | 2.27                             | [ 1.74 , 2.81] | Inferior by ≥100%         | <0.001         |
| [CoC] Bicontact Cementless Stem Plasmacup SC                  | 289                   | 1.01                          | 0.46                             | [-0.60 , 1.51] | Non-inferiority not shown | 0.395          |
| [CoC] Bimetric Cementless Stem Exceed ABT                     | 627                   | 1.80                          | 1.24                             | [ 0.31 , 2.17] | Inferior by ≥20%          | 0.009          |
| [CoC] C-Stem AMT Cemented Stem Pinnacle                       | 427                   | 1.30                          | 0.74                             | [-0.10 , 1.59] | Non-inferiority not shown | 0.085          |
| [CoC] C-Stem Cemented Stem Pinnacle                           | 310                   | 1.44                          | 0.88                             | [-0.42 , 2.19] | Non-inferiority not shown | 0.185          |
| [CoC] CPT Continuum                                           | 379                   | 2.40                          | 1.85                             | [ 0.77 , 2.92] | Inferior by ≥100%         | 0.001          |
| [CoC] CPT Trilogy AB                                          | 468                   | 1.70                          | 1.15                             | [-0.02 , 2.31] | Non-inferiority not shown | 0.053          |
| [CoC] Corail DeltaMotion                                      | 633                   | 1.64                          | 1.08                             | [ 0.28 , 1.89] | Inferior by ≥20%          | 0.008          |
| [CoC] Corail Duraloc Option                                   | 1,014                 | 2.99                          | 2.44                             | [ 1.35 , 3.52] | Inferior by ≥100%         | <0.001         |
| [CoC] Corail Pinnacle                                         | 17,510                | 2.40                          | 1.85                             | [ 1.44 , 2.26] | Inferior by ≥100%         | <0.001         |
| [CoC] Excia Cementless Plasmacup SC                           | 501                   | 1.33                          | 0.77                             | [ 0.00 , 1.54] | Non-inferiority not shown | 0.049          |
| [CoC] Exeter V40 ABG II Cementless Cup                        | 1,138                 | 1.20                          | 0.64                             | [-0.04 , 1.32] | Non-inferiority not shown | 0.063          |
| [CoC] Exeter V40 Trident                                      | 8,141                 | 1.50                          | 0.94                             | [ 0.51 , 1.38] | Inferior by ≥20%          | <0.001         |
| [CoC] Furlong HAC Stem CSF                                    | 1,502                 | 2.59                          | 2.03                             | [ 1.18 , 2.89] | Inferior by ≥100%         | <0.001         |
| [CoC] Furlong HAC Stem Furlong HAC CSF Plus                   | 5,470                 | 1.84                          | 1.28                             | [ 0.84 , 1.73] | Inferior by ≥100%         | <0.001         |
| [CoC] Furlong HAC Stem Furlong Threaded                       | 318                   | 3.01                          | 2.46                             | [ 0.58 , 4.34] | Inferior by ≥100%         | 0.010          |
| [CoC] M/L Taper Cementless Continuum                          | 607                   | 1.71                          | 1.15                             | [ 0.46 , 1.85] | Inferior by ≥20%          | 0.001          |
| [CoC] Metafix Stem Trinity                                    | 280                   | 1.52                          | 0.96                             | [ 0.14 , 1.79] | Inferior by ≥20%          | 0.022          |
| [CoC] Omnifit Cementless Stem Trident                         | 387                   | 3.10                          | 2.54                             | [ 0.95 , 4.13] | Inferior by ≥100%         | 0.002          |
| [CoC] Polarstem Cementless R3 Cementless                      | 300                   | 0.78                          | 0.22                             | [-0.40 , 0.85] | Non-inferiority not shown | 0.487          |
| [CoC] S-Rom Cementless Stem Pinnacle                          | 407                   | 4.35                          | 3.79                             | [ 2.12 , 5.46] | Inferior by ≥100%         | <0.001         |
| [CoC] SL-Plus Cementless Stem EP-Fit Plus                     | 1,115                 | 4.96                          | 4.40                             | [ 3.14 , 5.66] | Inferior by ≥100%         | <0.001         |
| [CoC] SPS Modular April - Ceramic                             | 321                   | 2.99                          | 2.43                             | [ 0.95 , 3.92] | Inferior by ≥100%         | 0.001          |
| [CoC] Summit Cementless Stem Pinnacle                         | 385                   | 1.33                          | 0.78                             | [-0.18 , 1.73] | Non-inferiority not shown | 0.110          |
| [CoC] Taperloc Cementless Stem Exceed ABT                     | 3,900                 | 1.83                          | 1.27                             | [ 0.80 , 1.74] | Inferior by ≥100%         | <0.001         |
| [CoP] Accolade Trident                                        | 1,372                 | 1.95                          | 1.39                             | [ 0.82 , 1.97] | Inferior by ≥100%         | <0.001         |
| [CoP] C-Stem Cemented Stem Elite Plus Ogee                    | 474                   | 0.75                          | 0.20                             | [-0.56 , 0.96] | Non-inferiority not shown | 0.609          |
| [CoP] C-Stem Cemented Stem Marathon                           | 542                   | 1.34                          | 0.79                             | [ 0.10 , 1.47] | Non-inferiority not shown | 0.024          |
| [CoP] C-Stem Cemented Stem Opera                              | 656                   | 1.33                          | 0.77                             | [-0.12 , 1.67] | Non-inferiority not shown | 0.091          |
| [CoP] C-Stem Cemented Stem Wroblewski Golf Ball               | 738                   | 1.05                          | 0.49                             | [-0.25 , 1.24] | Non-inferiority not shown | 0.196          |
| [CoP] CPT ZCA                                                 | 261                   | 0.39                          | -0.17                            | [-0.82 , 0.48] | Non-inferiority not shown | 0.611          |
| [CoP] Corail Charnley and Elite Plus LPW                      | 532                   | 1.89                          | 1.33                             | [ 0.25 , 2.42] | Inferior by ≥20%          | 0.016          |
| [CoP] Corail Duraloc Cementless Cup                           | 289                   | 4.72                          | 4.17                             | [ 1.81 , 6.53] | Inferior by ≥100%         | 0.001          |
| [CoP] Corail Elite Plus Cemented Cup                          | 328                   | 1.50                          | 0.95                             | [-0.24 , 2.13] | Non-inferiority not shown | 0.117          |
| [CoP] Corail Elite Plus Ogee                                  | 340                   | 2.64                          | 2.08                             | [ 0.61 , 3.55] | Inferior by ≥100%         | 0.006          |
| [CoP] Corail Marathon                                         | 573                   | 1.40                          | 0.84                             | [ 0.19 , 1.49] | Inferior by ≥20%          | 0.012          |
| [CoP] Corail Pinnacle                                         | 4,134                 | 1.74                          | 1.18                             | [ 0.74 , 1.63] | Inferior by ≥100%         | <0.001         |

|                                                               |       |      |      |                |                           |        |
|---------------------------------------------------------------|-------|------|------|----------------|---------------------------|--------|
| [CoP] Corail Trilogy                                          | 592   | 1.61 | 1.06 | [ 0.04 , 2.07] | Non-inferiority not shown | 0.041  |
| [CoP] Exeter V40 Charnley and Elite Plus LPW                  | 433   | 2.02 | 1.47 | [ 0.38 , 2.55] | Inferior by $\geq 20\%$   | 0.008  |
| [CoP] Exeter V40 Elite Plus Ogee                              | 858   | 1.08 | 0.53 | [-0.14 , 1.20] | Non-inferiority not shown | 0.122  |
| [CoP] Exeter V40 Exeter Contemporary Flanged                  | 2,011 | 1.31 | 0.76 | [ 0.23 , 1.28] | Inferior by $\geq 20\%$   | 0.005  |
| [CoP] Exeter V40 Exeter Contemporary Hooded                   | 593   | 2.58 | 2.03 | [ 0.93 , 3.12] | Inferior by $\geq 100\%$  | <0.001 |
| [CoP] Exeter V40 Exeter Duration                              | 664   | 0.95 | 0.40 | [-0.36 , 1.16] | Non-inferiority not shown | 0.304  |
| [CoP] Exeter V40 Exeter X3 Rimfit                             | 363   | 1.16 | 0.60 | [ 0.09 , 1.12] | Non-inferiority not shown | 0.022  |
| [CoP] Exeter V40 Marathon                                     | 258   | 0.94 | 0.38 | [-0.44 , 1.21] | Non-inferiority not shown | 0.365  |
| [CoP] Exeter V40 Pinnacle                                     | 297   | 1.53 | 0.98 | [ 0.08 , 1.87] | Non-inferiority not shown | 0.032  |
| [CoP] Exeter V40 Trident                                      | 2,337 | 1.16 | 0.60 | [ 0.15 , 1.06] | Inferior by $\geq 20\%$   | 0.009  |
| [CoP] Exeter V40 Trilogy                                      | 1,627 | 1.31 | 0.76 | [ 0.15 , 1.37] | Inferior by $\geq 20\%$   | 0.015  |
| [CoP] Furlong HAC Stem CSF                                    | 5,425 | 1.65 | 1.09 | [ 0.61 , 1.57] | Inferior by $\geq 100\%$  | <0.001 |
| [CoP] Furlong HAC Stem Furlong HAC CSF Plus                   | 908   | 2.02 | 1.47 | [ 0.74 , 2.19] | Inferior by $\geq 100\%$  | <0.001 |
| [CoP] Furlong HAC Stem Furlong Threaded                       | 362   | 1.29 | 0.73 | [-0.45 , 1.91] | Non-inferiority not shown | 0.225  |
| [CoP] Muller Straight Stem Original ME Muller Low Profile Cup | 298   | 1.22 | 0.67 | [-0.38 , 1.71] | Non-inferiority not shown | 0.210  |
| [CoP] SL-Plus Cementless Stem Bicon-Plus                      | 558   | 4.05 | 3.50 | [ 1.93 , 5.07] | Inferior by $\geq 100\%$  | <0.001 |
| [CoP] SL-Plus Cementless Stem EP-Fit Plus                     | 810   | 3.41 | 2.86 | [ 1.65 , 4.06] | Inferior by $\geq 100\%$  | <0.001 |
| [CoP] Stanmore Modular Stem Stanmore-Arcom Cup                | 257   | 1.19 | 0.64 | [-0.46 , 1.74] | Non-inferiority not shown | 0.257  |
| [CoP] Taperloc Cementless Stem Exceed ABT                     | 775   | 1.43 | 0.87 | [ 0.26 , 1.49] | Inferior by $\geq 20\%$   | 0.006  |
| [CoP] Versys Cementless Stem Trilogy                          | 342   | 1.07 | 0.51 | [-0.59 , 1.61] | Non-inferiority not shown | 0.363  |
| [MoP] ABG II Monolithic Cementless Stem ABG II Cementless Cup | 419   | 1.92 | 1.37 | [ 0.07 , 2.66] | Non-inferiority not shown | 0.039  |
| [MoP] ABG II Monolithic Cementless Stem Trident               | 402   | 4.11 | 3.56 | [ 1.71 , 5.41] | Inferior by $\geq 100\%$  | <0.001 |
| [MoP] Accolade Trident                                        | 6,100 | 2.76 | 2.21 | [ 1.72 , 2.70] | Inferior by $\geq 100\%$  | <0.001 |
| [MoP] Anthology R3 Cementless                                 | 353   | 2.14 | 1.59 | [ 0.69 , 2.48] | Inferior by $\geq 100\%$  | <0.001 |
| [MoP] Bimetric Cementless Stem Mallory-Head Cementless Cup    | 271   | 2.05 | 1.50 | [ 0.23 , 2.76] | Inferior by $\geq 20\%$   | 0.020  |
| [MoP] C-Stem AMT Cemented Stem Charnley and Elite Plus LPW    | 1,397 | 1.46 | 0.90 | [ 0.30 , 1.51] | Inferior by $\geq 20\%$   | 0.003  |
| [MoP] C-Stem AMT Cemented Stem Elite Plus Cemented Cup        | 435   | 1.22 | 0.66 | [-0.26 , 1.58] | Non-inferiority not shown | 0.157  |
| [MoP] C-Stem AMT Cemented Stem Elite Plus Ogee                | 918   | 1.01 | 0.46 | [-0.13 , 1.05] | Non-inferiority not shown | 0.130  |
| [MoP] C-Stem AMT Cemented Stem Marathon                       | 356   | 1.46 | 0.90 | [ 0.10 , 1.71] | Non-inferiority not shown | 0.028  |
| [MoP] C-Stem AMT Cemented Stem Pinnacle                       | 657   | 1.85 | 1.29 | [ 0.56 , 2.02] | Inferior by $\geq 100\%$  | 0.001  |
| [MoP] C-Stem Cemented Stem Charnley Ogee                      | 680   | 1.86 | 1.30 | [ 0.34 , 2.26] | Inferior by $\geq 20\%$   | 0.008  |
| [MoP] C-Stem Cemented Stem Charnley and Elite Plus LPW        | 1,435 | 1.57 | 1.02 | [ 0.31 , 1.72] | Inferior by $\geq 20\%$   | 0.005  |
| [MoP] C-Stem Cemented Stem Duraloc Cementless Cup             | 496   | 2.67 | 2.12 | [ 0.73 , 3.50] | Inferior by $\geq 100\%$  | 0.003  |
| [MoP] C-Stem Cemented Stem Elite Plus Cemented Cup            | 586   | 0.90 | 0.34 | [-0.46 , 1.15] | Non-inferiority not shown | 0.405  |
| [MoP] C-Stem Cemented Stem Elite Plus Ogee                    | 2,459 | 1.13 | 0.57 | [ 0.06 , 1.08] | Non-inferiority not shown | 0.028  |
| [MoP] C-Stem Cemented Stem Marathon                           | 744   | 1.25 | 0.70 | [ 0.08 , 1.32] | Non-inferiority not shown | 0.028  |
| [MoP] C-Stem Cemented Stem Opera                              | 1,013 | 1.44 | 0.89 | [ 0.16 , 1.62] | Inferior by $\geq 20\%$   | 0.017  |
| [MoP] C-Stem Cemented Stem Pinnacle                           | 331   | 1.56 | 1.01 | [-0.13 , 2.14] | Non-inferiority not shown | 0.083  |
| [MoP] C-Stem Cemented Stem Polarcup Cementless                | 255   | 0.71 | 0.16 | [-0.89 , 1.21] | Non-inferiority not shown | 0.768  |
| [MoP] C-Stem Cemented Stem Trilogy                            | 338   | 0.82 | 0.26 | [-0.73 , 1.25] | Non-inferiority not shown | 0.606  |
| [MoP] C-Stem Cemented Stem Wroblewski Golf Ball               | 756   | 1.50 | 0.94 | [ 0.10 , 1.79] | Non-inferiority not shown | 0.028  |
| [MoP] CCA Cemented Stem CCB Cup                               | 738   | 0.79 | 0.23 | [-0.38 , 0.85] | Non-inferiority not shown | 0.459  |
| [MoP] CLS Cementless Stem Allofit                             | 553   | 2.90 | 2.34 | [ 1.01 , 3.68] | Inferior by $\geq 100\%$  | 0.001  |
| [MoP] CLS Cementless Stem Trilogy                             | 419   | 3.18 | 2.63 | [ 1.17 , 4.09] | Inferior by $\geq 100\%$  | <0.001 |
| [MoP] CMK Modular Cemented Stem CMK Cemented Cup              | 418   | 1.08 | 0.52 | [-0.49 , 1.53] | Non-inferiority not shown | 0.310  |
| [MoP] CPCS Opera                                              | 866   | 1.28 | 0.72 | [-0.02 , 1.46] | Non-inferiority not shown | 0.056  |

|                                                            |        |      |       |                |                           |        |
|------------------------------------------------------------|--------|------|-------|----------------|---------------------------|--------|
| [MoP] CPCS Polarcup Cementless                             | 368    | 0.99 | 0.43  | [-0.60 , 1.46] | Non-inferiority not shown | 0.410  |
| [MoP] CPS Plus Cenator Cemented Cup                        | 339    | 0.80 | 0.25  | [-0.73 , 1.23] | Non-inferiority not shown | 0.618  |
| [MoP] CPS Plus EP-Fit Plus                                 | 282    | 3.23 | 2.68  | [ 0.67 , 4.69] | Inferior by $\geq 100\%$  | 0.009  |
| [MoP] CPS Plus Opera                                       | 464    | 2.16 | 1.61  | [ 0.29 , 2.92] | Inferior by $\geq 20\%$   | 0.017  |
| [MoP] CPT Allofit                                          | 430    | 0.94 | 0.39  | [-0.41 , 1.18] | Non-inferiority not shown | 0.339  |
| [MoP] CPT Elite Plus Ogee                                  | 1,744  | 1.87 | 1.32  | [ 0.67 , 1.97] | Inferior by $\geq 100\%$  | <0.001 |
| [MoP] CPT Exceed                                           | 263    | 4.10 | 3.55  | [ 1.24 , 5.85] | Inferior by $\geq 100\%$  | 0.003  |
| [MoP] CPT Opera                                            | 378    | 2.17 | 1.62  | [ 0.16 , 3.07] | Inferior by $\geq 20\%$   | 0.029  |
| [MoP] CPT Original ME Muller Low Profile Cup               | 422    | 2.20 | 1.64  | [ 0.54 , 2.75] | Inferior by $\geq 20\%$   | 0.004  |
| [MoP] CPT Pinnacle                                         | 639    | 2.42 | 1.86  | [ 0.72 , 3.00] | Inferior by $\geq 100\%$  | 0.001  |
| [MoP] CPT Trabecular Metal Modular Cementless Cup          | 523    | 2.41 | 1.85  | [ 0.82 , 2.89] | Inferior by $\geq 100\%$  | <0.001 |
| [MoP] CPT Trilogy                                          | 5,765  | 2.20 | 1.65  | [ 1.17 , 2.12] | Inferior by $\geq 100\%$  | <0.001 |
| [MoP] CPT ZCA                                              | 5,547  | 2.11 | 1.55  | [ 1.07 , 2.03] | Inferior by $\geq 100\%$  | <0.001 |
| [MoP] Centrament Chirulen                                  | 310    | 1.12 | 0.57  | [-0.59 , 1.72] | Non-inferiority not shown | 0.337  |
| [MoP] Charnley Cemented Stem Charnley Cemented Cup         | 3,601  | 1.72 | 1.17  | [ 0.63 , 1.71] | Inferior by $\geq 100\%$  | <0.001 |
| [MoP] Charnley Cemented Stem Charnley Ogee                 | 7,533  | 1.88 | 1.33  | [ 0.86 , 1.79] | Inferior by $\geq 100\%$  | <0.001 |
| [MoP] Charnley Cemented Stem Charnley and Elite Plus LPW   | 5,041  | 1.12 | 0.56  | [ 0.11 , 1.02] | Non-inferiority not shown | 0.015  |
| [MoP] Charnley Cemented Stem Opera                         | 1,039  | 1.46 | 0.91  | [ 0.14 , 1.67] | Inferior by $\geq 20\%$   | 0.020  |
| [MoP] Charnley Cemented Stem Wroblewski Golf Ball          | 797    | 1.74 | 1.18  | [ 0.30 , 2.06] | Inferior by $\geq 20\%$   | 0.008  |
| [MoP] Charnley Modular Charnley and Elite Plus LPW         | 277    | 0.27 | -0.28 | [-0.93 , 0.37] | Non-inferiority not shown | 0.393  |
| [MoP] Corail Charnley and Elite Plus LPW                   | 448    | 1.85 | 1.30  | [ 0.30 , 2.29] | Inferior by $\geq 20\%$   | 0.010  |
| [MoP] Corail Duraloc Cementless Cup                        | 3,226  | 2.27 | 1.71  | [ 1.10 , 2.33] | Inferior by $\geq 100\%$  | <0.001 |
| [MoP] Corail Elite Plus Cemented Cup                       | 727    | 1.31 | 0.75  | [-0.05 , 1.56] | Non-inferiority not shown | 0.067  |
| [MoP] Corail Elite Plus Ogee                               | 1,029  | 1.70 | 1.14  | [ 0.41 , 1.88] | Inferior by $\geq 20\%$   | 0.002  |
| [MoP] Corail Exeter Contemporary Flanged                   | 328    | 1.35 | 0.79  | [-0.14 , 1.72] | Non-inferiority not shown | 0.095  |
| [MoP] Corail Marathon                                      | 1,385  | 1.23 | 0.67  | [ 0.17 , 1.18] | Inferior by $\geq 20\%$   | 0.009  |
| [MoP] Corail Pinnacle                                      | 16,408 | 1.70 | 1.15  | [ 0.76 , 1.54] | Inferior by $\geq 100\%$  | <0.001 |
| [MoP] Corail Trilogy                                       | 1,383  | 1.72 | 1.17  | [ 0.47 , 1.87] | Inferior by $\geq 20\%$   | 0.001  |
| [MoP] Elite Plus Cemented Stem Charnley and Elite Plus LPW | 308    | 1.66 | 1.11  | [-0.26 , 2.47] | Non-inferiority not shown | 0.113  |
| [MoP] Elite Plus Cemented Stem Elite Plus Ogee             | 519    | 1.06 | 0.50  | [-0.42 , 1.42] | Non-inferiority not shown | 0.284  |
| [MoP] Exeter Elite Plus Ogee                               | 259    | 0.71 | 0.15  | [-0.89 , 1.20] | Non-inferiority not shown | 0.775  |
| [MoP] Exeter V40 ABG II Cementless Cup                     | 693    | 1.56 | 1.00  | [ 0.05 , 1.95] | Non-inferiority not shown | 0.038  |
| [MoP] Exeter V40 Cenator Cemented Cup                      | 1,725  | 1.99 | 1.44  | [ 0.75 , 2.12] | Inferior by $\geq 100\%$  | <0.001 |
| [MoP] Exeter V40 Charnley Cemented Cup                     | 286    | 0.87 | 0.32  | [-0.73 , 1.37] | Non-inferiority not shown | 0.553  |
| [MoP] Exeter V40 Charnley Ogee                             | 1,113  | 1.44 | 0.88  | [ 0.15 , 1.61] | Inferior by $\geq 20\%$   | 0.018  |
| [MoP] Exeter V40 Charnley and Elite Plus LPW               | 1,812  | 1.47 | 0.91  | [ 0.34 , 1.48] | Inferior by $\geq 20\%$   | 0.002  |
| [MoP] Exeter V40 Duraloc Cementless Cup                    | 1,000  | 2.04 | 1.48  | [ 0.56 , 2.40] | Inferior by $\geq 100\%$  | 0.002  |
| [MoP] Exeter V40 EP-Fit Plus                               | 496    | 2.56 | 2.01  | [ 0.63 , 3.38] | Inferior by $\geq 100\%$  | 0.004  |
| [MoP] Exeter V40 Elite Plus Cemented Cup                   | 2,674  | 0.76 | 0.21  | [-0.25 , 0.66] | Non-inferiority not shown | 0.376  |
| [MoP] Exeter V40 Elite Plus Ogee                           | 12,458 | 1.11 | 0.56  | [ 0.16 , 0.96] | Inferior by $\geq 20\%$   | 0.006  |
| [MoP] Exeter V40 Exceed                                    | 375    | 0.94 | 0.39  | [-0.51 , 1.29] | Non-inferiority not shown | 0.399  |
| [MoP] Exeter V40 Exceed ABT                                | 305    | 1.17 | 0.62  | [-0.43 , 1.67] | Non-inferiority not shown | 0.251  |
| [MoP] Exeter V40 Exeter Contemporary Flanged               | 26,691 | 1.21 | 0.65  | [ 0.27 , 1.03] | Inferior by $\geq 20\%$   | 0.001  |
| [MoP] Exeter V40 Exeter Contemporary Hooded                | 11,227 | 2.10 | 1.54  | [ 1.12 , 1.96] | Inferior by $\geq 100\%$  | <0.001 |
| [MoP] Exeter V40 Exeter Duration                           | 10,271 | 1.70 | 1.15  | [ 0.72 , 1.57] | Inferior by $\geq 100\%$  | <0.001 |
| [MoP] Exeter V40 Exeter X3 Rimfit                          | 859    | 1.16 | 0.61  | [ 0.14 , 1.07] | Inferior by $\geq 20\%$   | 0.010  |

|                                                               |        |      |      |                |                           |        |
|---------------------------------------------------------------|--------|------|------|----------------|---------------------------|--------|
| [MoP] Exeter V40 Marathon                                     | 555    | 1.54 | 0.99 | [ 0.24 , 1.73] | Inferior by $\geq 20\%$   | 0.010  |
| [MoP] Exeter V40 Opera                                        | 1,734  | 1.18 | 0.63 | [ 0.06 , 1.19] | Non-inferiority not shown | 0.030  |
| [MoP] Exeter V40 Pinnacle                                     | 1,546  | 1.60 | 1.05 | [ 0.48 , 1.62] | Inferior by $\geq 20\%$   | <0.001 |
| [MoP] Exeter V40 Reflection Cementless                        | 1,812  | 1.58 | 1.02 | [ 0.37 , 1.67] | Inferior by $\geq 20\%$   | 0.002  |
| [MoP] Exeter V40 Trabecular Metal Modular Cementless Cup      | 276    | 2.23 | 1.68 | [ 0.19 , 3.17] | Inferior by $\geq 20\%$   | 0.028  |
| [MoP] Exeter V40 Trabecular Metal Natural Cup                 | 284    | 4.06 | 3.51 | [ 1.39 , 5.63] | Inferior by $\geq 100\%$  | 0.001  |
| [MoP] Exeter V40 Trident                                      | 10,507 | 1.44 | 0.88 | [ 0.48 , 1.29] | Inferior by $\geq 20\%$   | <0.001 |
| [MoP] Exeter V40 Trilogy                                      | 6,611  | 1.33 | 0.77 | [ 0.34 , 1.21] | Inferior by $\geq 20\%$   | 0.001  |
| [MoP] Exeter V40 Ultima Cemented Cup                          | 1,040  | 2.19 | 1.64 | [ 0.73 , 2.55] | Inferior by $\geq 100\%$  | <0.001 |
| [MoP] Furlong Cemented Stem JRI Cemented Cup                  | 1,287  | 1.66 | 1.11 | [ 0.37 , 1.84] | Inferior by $\geq 20\%$   | 0.003  |
| [MoP] Furlong HAC Stem CSF                                    | 5,416  | 2.43 | 1.87 | [ 1.36 , 2.38] | Inferior by $\geq 100\%$  | <0.001 |
| [MoP] Furlong HAC Stem Furlong HAC CSF Plus                   | 1,808  | 2.91 | 2.35 | [ 1.70 , 3.01] | Inferior by $\geq 100\%$  | <0.001 |
| [MoP] Furlong HAC Stem Furlong Threaded                       | 416    | 3.01 | 2.46 | [ 0.91 , 4.00] | Inferior by $\geq 100\%$  | 0.002  |
| [MoP] Furlong HAC Stem Trilogy                                | 264    | 1.90 | 1.35 | [-0.10 , 2.80] | Non-inferiority not shown | 0.067  |
| [MoP] M/L Taper Cementless Allofit                            | 295    | 2.04 | 1.48 | [ 0.22 , 2.74] | Inferior by $\geq 20\%$   | 0.021  |
| [MoP] M/L Taper Cementless Trilogy                            | 328    | 2.54 | 1.98 | [ 0.73 , 3.23] | Inferior by $\geq 100\%$  | 0.002  |
| [MoP] MS-30 Allofit                                           | 269    | 0.57 | 0.01 | [-0.85 , 0.87] | Non-inferiority not shown | 0.981  |
| [MoP] MS-30 Original ME Muller Low Profile Cup                | 531    | 1.23 | 0.67 | [-0.19 , 1.54] | Non-inferiority not shown | 0.128  |
| [MoP] Mem Original ME Muller Low Profile Cup                  | 313    | 0.86 | 0.30 | [-0.73 , 1.34] | Non-inferiority not shown | 0.567  |
| [MoP] Muller Straight Stem Centerpulse Muller                 | 442    | 1.79 | 1.24 | [ 0.02 , 2.46] | Non-inferiority not shown | 0.047  |
| [MoP] Muller Straight Stem Original ME Muller Low Profile Cup | 1,008  | 1.12 | 0.56 | [-0.07 , 1.19] | Non-inferiority not shown | 0.080  |
| [MoP] Muller-Biomet Apollo                                    | 1,539  | 1.41 | 0.86 | [ 0.23 , 1.49] | Inferior by $\geq 20\%$   | 0.008  |
| [MoP] Muller-Biomet Original ME Muller Low Profile Cup        | 512    | 1.96 | 1.41 | [ 0.41 , 2.40] | Inferior by $\geq 20\%$   | 0.006  |
| [MoP] Omnifit Cemented Stem ODC                               | 801    | 1.98 | 1.43 | [ 0.45 , 2.41] | Inferior by $\geq 20\%$   | 0.004  |
| [MoP] Omnifit Cemented Stem Trident                           | 250    | 1.89 | 1.34 | [-0.35 , 3.02] | Non-inferiority not shown | 0.120  |
| [MoP] Omnifit Cementless Stem Secure Fit Cementless Cup       | 275    | 0.69 | 0.14 | [-0.89 , 1.16] | Non-inferiority not shown | 0.791  |
| [MoP] Omnifit Cementless Stem Trident                         | 385    | 5.46 | 4.90 | [ 2.78 , 7.02] | Inferior by $\geq 100\%$  | <0.001 |
| [MoP] P10 Muller Original ME Muller Low Profile Cup           | 293    | 0.96 | 0.41 | [-0.52 , 1.34] | Non-inferiority not shown | 0.388  |
| [MoP] SL-Plus Cementless Stem EP-Fit Plus                     | 1,651  | 3.51 | 2.96 | [ 2.12 , 3.80] | Inferior by $\geq 100\%$  | <0.001 |
| [MoP] SP II Cemented Stem Interplanta                         | 552    | 3.23 | 2.67 | [ 1.29 , 4.05] | Inferior by $\geq 100\%$  | <0.001 |
| [MoP] Spectron Reflection Cementless                          | 267    | 1.24 | 0.68 | [-0.58 , 1.94] | Non-inferiority not shown | 0.289  |
| [MoP] Stanmore Modular Stem Elite Plus Cemented Cup           | 406    | 0.98 | 0.42 | [-0.51 , 1.36] | Non-inferiority not shown | 0.375  |
| [MoP] Stanmore Modular Stem SHP Cup                           | 677    | 0.95 | 0.40 | [-0.30 , 1.10] | Non-inferiority not shown | 0.265  |
| [MoP] Stanmore Modular Stem Stanmore-Arcom Cup                | 2,920  | 1.62 | 1.06 | [ 0.52 , 1.60] | Inferior by $\geq 20\%$   | <0.001 |
| [MoP] Synergy Cementless Stem Reflection Cementless           | 1,370  | 1.43 | 0.87 | [ 0.16 , 1.59] | Inferior by $\geq 20\%$   | 0.016  |
| [MoP] Taperfit Cemented Stem Atlas IIIp                       | 250    | 2.18 | 1.63 | [ 0.20 , 3.06] | Inferior by $\geq 20\%$   | 0.026  |
| [MoP] Taperloc Cementless Stem Exceed                         | 470    | 1.57 | 1.01 | [-0.07 , 2.10] | Non-inferiority not shown | 0.066  |
| [MoP] Taperloc Cementless Stem Exceed ABT                     | 1,793  | 2.07 | 1.52 | [ 0.98 , 2.06] | Inferior by $\geq 100\%$  | <0.001 |
| [MoP] Versys Cementless Stem Trilogy                          | 797    | 4.81 | 4.26 | [ 2.82 , 5.69] | Inferior by $\geq 100\%$  | <0.001 |

**Supplementary table 1c: Difference in Kaplan-Meier failure estimate between a contemporary reference and implants with at least 250 at risk at 7 years since primary**

| <b>Stem/cup brand</b>                                         | <b>Number at risk</b> | <b>Cumulative failure (%)</b> | <b>Difference in failure (%)</b> | <b>95% CI</b>  | <b>Equivalence status</b> | <b>p-value</b> |
|---------------------------------------------------------------|-----------------------|-------------------------------|----------------------------------|----------------|---------------------------|----------------|
| [MoP] Exeter V40 Elite Plus Cemented Cup                      | 1,773                 | 0.91                          | [REFERENCE]                      |                |                           |                |
| [CoC] ABG II Monolithic Cementless Stem ABG II Cementless Cup | 909                   | 3.09                          | 2.19                             | [ 1.10 , 3.27] | Inferior by $\geq 100\%$  | <0.001         |
| [CoC] ABG II Monolithic Cementless Stem Trident               | 705                   | 3.68                          | 2.77                             | [ 1.55 , 4.00] | Inferior by $\geq 100\%$  | <0.001         |
| [CoC] Accolade Trident                                        | 2,978                 | 3.31                          | 2.40                             | [ 1.86 , 2.95] | Inferior by $\geq 100\%$  | <0.001         |
| [CoC] C-Stem Cemented Stem Pinnacle                           | 286                   | 1.44                          | 0.53                             | [-0.76 , 1.82] | Non-inferiority not shown | 0.420          |
| [CoC] CPT Trilogy AB                                          | 265                   | 1.93                          | 1.03                             | [-0.20 , 2.26] | Non-inferiority not shown | 0.101          |
| [CoC] Corail Duraloc Option                                   | 819                   | 3.61                          | 2.71                             | [ 1.54 , 3.88] | Inferior by $\geq 100\%$  | <0.001         |
| [CoC] Corail Pinnacle                                         | 7,589                 | 2.93                          | 2.03                             | [ 1.65 , 2.40] | Inferior by $\geq 100\%$  | <0.001         |
| [CoC] Exeter V40 ABG II Cementless Cup                        | 918                   | 1.69                          | 0.79                             | [ 0.01 , 1.57] | Non-inferiority not shown | 0.048          |
| [CoC] Exeter V40 Trident                                      | 5,732                 | 1.99                          | 1.09                             | [ 0.67 , 1.51] | Inferior by $\geq 20\%$   | <0.001         |
| [CoC] Furlong HAC Stem CSF                                    | 1,405                 | 3.19                          | 2.29                             | [ 1.37 , 3.21] | Inferior by $\geq 100\%$  | <0.001         |
| [CoC] Furlong HAC Stem Furlong HAC CSF Plus                   | 2,083                 | 2.15                          | 1.25                             | [ 0.81 , 1.69] | Inferior by $\geq 20\%$   | <0.001         |
| [CoC] Furlong HAC Stem Furlong Threaded                       | 308                   | 4.24                          | 3.34                             | [ 1.14 , 5.53] | Inferior by $\geq 100\%$  | 0.003          |
| [CoC] Omnifit Cementless Stem Trident                         | 313                   | 4.21                          | 3.31                             | [ 1.41 , 5.21] | Inferior by $\geq 100\%$  | 0.001          |
| [CoC] SL-Plus Cementless Stem EP-Fit Plus                     | 968                   | 5.32                          | 4.41                             | [ 3.12 , 5.70] | Inferior by $\geq 100\%$  | <0.001         |
| [CoC] Summit Cementless Stem Pinnacle                         | 301                   | 1.60                          | 0.69                             | [-0.37 , 1.76] | Non-inferiority not shown | 0.203          |
| [CoC] Taperloc Cementless Stem Exceed ABT                     | 1,609                 | 2.02                          | 1.12                             | [ 0.65 , 1.58] | Inferior by $\geq 20\%$   | <0.001         |
| [CoP] Accolade Trident                                        | 544                   | 2.20                          | 1.29                             | [ 0.64 , 1.95] | Inferior by $\geq 20\%$   | <0.001         |
| [CoP] C-Stem Cemented Stem Elite Plus Ogee                    | 342                   | 0.75                          | -0.15                            | [-0.89 , 0.58] | Non-inferiority not shown | 0.684          |
| [CoP] C-Stem Cemented Stem Opera                              | 478                   | 1.69                          | 0.79                             | [-0.22 , 1.80] | Non-inferiority not shown | 0.127          |
| [CoP] C-Stem Cemented Stem Wroblewski Golf Ball               | 598                   | 1.67                          | 0.76                             | [-0.18 , 1.70] | Non-inferiority not shown | 0.112          |
| [CoP] Corail Charnley and Elite Plus LPW                      | 335                   | 2.49                          | 1.59                             | [ 0.32 , 2.85] | Inferior by $\geq 20\%$   | 0.014          |
| [CoP] Corail Duraloc Cementless Cup                           | 266                   | 5.06                          | 4.15                             | [ 1.72 , 6.59] | Inferior by $\geq 100\%$  | 0.001          |
| [CoP] Corail Pinnacle                                         | 1,638                 | 2.16                          | 1.25                             | [ 0.78 , 1.73] | Inferior by $\geq 20\%$   | <0.001         |
| [CoP] Corail Trilogy                                          | 477                   | 1.61                          | 0.71                             | [-0.29 , 1.71] | Non-inferiority not shown | 0.164          |
| [CoP] Exeter V40 Charnley and Elite Plus LPW                  | 250                   | 2.02                          | 1.12                             | [ 0.05 , 2.19] | Non-inferiority not shown | 0.040          |
| [CoP] Exeter V40 Elite Plus Ogee                              | 535                   | 1.35                          | 0.44                             | [-0.29 , 1.18] | Non-inferiority not shown | 0.240          |
| [CoP] Exeter V40 Exeter Contemporary Flanged                  | 1,110                 | 1.42                          | 0.52                             | [ 0.00 , 1.03] | Non-inferiority not shown | 0.048          |
| [CoP] Exeter V40 Exeter Contemporary Hooded                   | 410                   | 3.14                          | 2.23                             | [ 0.98 , 3.48] | Inferior by $\geq 100\%$  | <0.001         |
| [CoP] Exeter V40 Exeter Duration                              | 500                   | 2.11                          | 1.21                             | [ 0.08 , 2.33] | Non-inferiority not shown | 0.035          |
| [CoP] Exeter V40 Trident                                      | 1,113                 | 1.46                          | 0.56                             | [ 0.07 , 1.05] | Non-inferiority not shown | 0.026          |
| [CoP] Exeter V40 Trilogy                                      | 1,159                 | 1.58                          | 0.67                             | [ 0.04 , 1.30] | Non-inferiority not shown | 0.037          |
| [CoP] Furlong HAC Stem CSF                                    | 4,459                 | 2.07                          | 1.16                             | [ 0.69 , 1.64] | Inferior by $\geq 20\%$   | <0.001         |
| [CoP] Furlong HAC Stem Furlong HAC CSF Plus                   | 345                   | 2.46                          | 1.55                             | [ 0.69 , 2.41] | Inferior by $\geq 20\%$   | <0.001         |
| [CoP] Furlong HAC Stem Furlong Threaded                       | 327                   | 1.84                          | 0.94                             | [-0.45 , 2.33] | Non-inferiority not shown | 0.187          |
| [CoP] MS-30 Original ME Muller Low Profile Cup                | 675                   | 0.70                          | -0.21                            | [-0.77 , 0.35] | Non-inferiority not shown | 0.460          |
| [CoP] SL-Plus Cementless Stem Bicon-Plus                      | 406                   | 4.66                          | 3.75                             | [ 2.06 , 5.45] | Inferior by $\geq 100\%$  | <0.001         |
| [CoP] SL-Plus Cementless Stem EP-Fit Plus                     | 579                   | 4.10                          | 3.20                             | [ 1.87 , 4.53] | Inferior by $\geq 100\%$  | <0.001         |
| [CoP] Versys Cementless Stem Trilogy                          | 303                   | 1.36                          | 0.46                             | [-0.77 , 1.69] | Non-inferiority not shown | 0.465          |
| [MoP] ABG II Monolithic Cementless Stem ABG II Cementless Cup | 376                   | 2.40                          | 1.50                             | [ 0.06 , 2.94] | Non-inferiority not shown | 0.041          |

|                                                            |       |      |       |                |                           |        |
|------------------------------------------------------------|-------|------|-------|----------------|---------------------------|--------|
| [MoP] ABG II Monolithic Cementless Stem Trident            | 301   | 5.72 | 4.81  | [ 2.60 , 7.02] | Inferior by $\geq 100\%$  | <0.001 |
| [MoP] Accolade Trident                                     | 2,764 | 3.50 | 2.59  | [ 2.07 , 3.11] | Inferior by $\geq 100\%$  | <0.001 |
| [MoP] C-Stem AMT Cemented Stem Charnley and Elite Plus LPW | 782   | 1.81 | 0.91  | [ 0.21 , 1.61] | Inferior by $\geq 20\%$   | 0.011  |
| [MoP] C-Stem AMT Cemented Stem Elite Plus Ogee             | 523   | 1.71 | 0.81  | [-0.02 , 1.64] | Non-inferiority not shown | 0.057  |
| [MoP] C-Stem AMT Cemented Stem Pinnacle                    | 298   | 2.08 | 1.18  | [ 0.34 , 2.02] | Inferior by $\geq 20\%$   | 0.006  |
| [MoP] C-Stem Cemented Stem Charnley Ogee                   | 539   | 2.03 | 1.12  | [ 0.12 , 2.12] | Non-inferiority not shown | 0.028  |
| [MoP] C-Stem Cemented Stem Charnley and Elite Plus LPW     | 1,298 | 1.94 | 1.04  | [ 0.29 , 1.79] | Inferior by $\geq 20\%$   | 0.007  |
| [MoP] C-Stem Cemented Stem Duraloc Cementless Cup          | 391   | 3.73 | 2.83  | [ 1.18 , 4.47] | Inferior by $\geq 100\%$  | 0.001  |
| [MoP] C-Stem Cemented Stem Elite Plus Cemented Cup         | 472   | 1.62 | 0.71  | [-0.34 , 1.76] | Non-inferiority not shown | 0.184  |
| [MoP] C-Stem Cemented Stem Elite Plus Ogee                 | 1,851 | 1.55 | 0.65  | [ 0.10 , 1.19] | Non-inferiority not shown | 0.020  |
| [MoP] C-Stem Cemented Stem Opera                           | 744   | 2.01 | 1.10  | [ 0.24 , 1.96] | Inferior by $\geq 20\%$   | 0.012  |
| [MoP] C-Stem Cemented Stem Pinnacle                        | 258   | 1.94 | 1.04  | [-0.30 , 2.38] | Non-inferiority not shown | 0.130  |
| [MoP] C-Stem Cemented Stem Trilogy                         | 278   | 1.11 | 0.21  | [-0.92 , 1.34] | Non-inferiority not shown | 0.719  |
| [MoP] C-Stem Cemented Stem Wroblewski Golf Ball            | 502   | 1.88 | 0.97  | [ 0.00 , 1.94] | Non-inferiority not shown | 0.050  |
| [MoP] CCA Cemented Stem CCB Cup                            | 328   | 1.69 | 0.78  | [-0.20 , 1.77] | Non-inferiority not shown | 0.119  |
| [MoP] CLS Cementless Stem Allofit                          | 350   | 3.77 | 2.87  | [ 1.30 , 4.44] | Inferior by $\geq 100\%$  | <0.001 |
| [MoP] CMK Modular Cemented Stem CMK Cemented Cup           | 329   | 1.08 | 0.17  | [-0.82 , 1.16] | Non-inferiority not shown | 0.734  |
| [MoP] CPCS Opera                                           | 324   | 2.86 | 1.95  | [ 0.78 , 3.12] | Inferior by $\geq 20\%$   | 0.001  |
| [MoP] CPS Plus Cenator Cemented Cup                        | 250   | 0.80 | -0.10 | [-1.06 , 0.86] | Non-inferiority not shown | 0.836  |
| [MoP] CPS Plus Opera                                       | 421   | 3.49 | 2.58  | [ 0.92 , 4.25] | Inferior by $\geq 100\%$  | 0.002  |
| [MoP] CPT Elite Plus Ogee                                  | 1,177 | 2.37 | 1.47  | [ 0.75 , 2.19] | Inferior by $\geq 20\%$   | <0.001 |
| [MoP] CPT Opera                                            | 276   | 3.01 | 2.11  | [ 0.39 , 3.82] | Inferior by $\geq 20\%$   | 0.016  |
| [MoP] CPT Trabecular Metal Modular Cementless Cup          | 270   | 3.00 | 2.09  | [ 0.78 , 3.40] | Inferior by $\geq 20\%$   | 0.002  |
| [MoP] CPT Trilogy                                          | 3,606 | 2.69 | 1.78  | [ 1.31 , 2.26] | Inferior by $\geq 100\%$  | <0.001 |
| [MoP] CPT ZCA                                              | 3,619 | 2.69 | 1.78  | [ 1.30 , 2.27] | Inferior by $\geq 100\%$  | <0.001 |
| [MoP] Centrament Chirulen                                  | 257   | 1.12 | 0.22  | [-0.93 , 1.36] | Non-inferiority not shown | 0.710  |
| [MoP] Charnley Cemented Stem Charnley Cemented Cup         | 3,004 | 2.31 | 1.41  | [ 0.84 , 1.97] | Inferior by $\geq 20\%$   | <0.001 |
| [MoP] Charnley Cemented Stem Charnley Ogee                 | 5,956 | 2.49 | 1.58  | [ 1.13 , 2.04] | Inferior by $\geq 100\%$  | <0.001 |
| [MoP] Charnley Cemented Stem Charnley and Elite Plus LPW   | 4,036 | 1.51 | 0.60  | [ 0.15 , 1.05] | Non-inferiority not shown | 0.009  |
| [MoP] Charnley Cemented Stem Opera                         | 733   | 2.08 | 1.18  | [ 0.29 , 2.07] | Inferior by $\geq 20\%$   | 0.009  |
| [MoP] Charnley Cemented Stem Wroblewski Golf Ball          | 659   | 1.87 | 0.96  | [ 0.07 , 1.86] | Non-inferiority not shown | 0.035  |
| [MoP] Corail Duraloc Cementless Cup                        | 2,661 | 3.39 | 2.48  | [ 1.79 , 3.18] | Inferior by $\geq 100\%$  | <0.001 |
| [MoP] Corail Elite Plus Cemented Cup                       | 467   | 1.82 | 0.91  | [-0.06 , 1.88] | Non-inferiority not shown | 0.065  |
| [MoP] Corail Elite Plus Ogee                               | 696   | 1.83 | 0.92  | [ 0.17 , 1.68] | Non-inferiority not shown | 0.016  |
| [MoP] Corail Marathon                                      | 354   | 1.49 | 0.59  | [ 0.03 , 1.15] | Non-inferiority not shown | 0.038  |
| [MoP] Corail Pinnacle                                      | 7,798 | 2.17 | 1.26  | [ 0.90 , 1.63] | Inferior by $\geq 20\%$   | <0.001 |
| [MoP] Corail Trilogy                                       | 855   | 2.65 | 1.75  | [ 0.86 , 2.63] | Inferior by $\geq 20\%$   | <0.001 |
| [MoP] Elite Plus Cemented Stem Charnley and Elite Plus LPW | 281   | 2.00 | 1.10  | [-0.41 , 2.60] | Non-inferiority not shown | 0.154  |
| [MoP] Elite Plus Cemented Stem Elite Plus Ogee             | 465   | 1.26 | 0.35  | [-0.63 , 1.33] | Non-inferiority not shown | 0.480  |
| [MoP] Exeter V40 ABG II Cementless Cup                     | 626   | 2.02 | 1.11  | [ 0.05 , 2.18] | Non-inferiority not shown | 0.040  |
| [MoP] Exeter V40 Cenator Cemented Cup                      | 1,274 | 2.26 | 1.36  | [ 0.65 , 2.07] | Inferior by $\geq 20\%$   | <0.001 |
| [MoP] Exeter V40 Charnley Ogee                             | 901   | 1.62 | 0.71  | [-0.03 , 1.46] | Non-inferiority not shown | 0.061  |
| [MoP] Exeter V40 Charnley and Elite Plus LPW               | 1,082 | 1.81 | 0.91  | [ 0.29 , 1.53] | Inferior by $\geq 20\%$   | 0.004  |
| [MoP] Exeter V40 Duraloc Cementless Cup                    | 754   | 2.24 | 1.33  | [ 0.39 , 2.27] | Inferior by $\geq 20\%$   | 0.005  |
| [MoP] Exeter V40 EP-Fit Plus                               | 424   | 3.64 | 2.74  | [ 1.09 , 4.38] | Inferior by $\geq 100\%$  | 0.001  |
| [MoP] Exeter V40 Elite Plus Ogee                           | 8,638 | 1.50 | 0.59  | [ 0.22 , 0.96] | Inferior by $\geq 20\%$   | 0.002  |

|                                                               |        |      |       |                |                           |        |
|---------------------------------------------------------------|--------|------|-------|----------------|---------------------------|--------|
| [MoP] Exeter V40 Exceed                                       | 265    | 0.94 | 0.04  | [-0.84 , 0.92] | Non-inferiority not shown | 0.934  |
| [MoP] Exeter V40 Exeter Contemporary Flanged                  | 16,415 | 1.58 | 0.67  | [ 0.33 , 1.01] | Inferior by $\geq 20\%$   | <0.001 |
| [MoP] Exeter V40 Exeter Contemporary Hooded                   | 7,073  | 2.79 | 1.89  | [ 1.47 , 2.30] | Inferior by $\geq 100\%$  | <0.001 |
| [MoP] Exeter V40 Exeter Duration                              | 7,252  | 2.45 | 1.55  | [ 1.13 , 1.97] | Inferior by $\geq 100\%$  | <0.001 |
| [MoP] Exeter V40 Opera                                        | 1,144  | 1.59 | 0.68  | [ 0.06 , 1.31] | Non-inferiority not shown | 0.032  |
| [MoP] Exeter V40 Pinnacle                                     | 718    | 1.89 | 0.98  | [ 0.35 , 1.61] | Inferior by $\geq 20\%$   | 0.002  |
| [MoP] Exeter V40 Reflection Cementless                        | 1,359  | 2.31 | 1.41  | [ 0.66 , 2.15] | Inferior by $\geq 20\%$   | <0.001 |
| [MoP] Exeter V40 Trident                                      | 5,685  | 1.85 | 0.95  | [ 0.57 , 1.33] | Inferior by $\geq 20\%$   | <0.001 |
| [MoP] Exeter V40 Trilogy                                      | 4,380  | 1.67 | 0.77  | [ 0.34 , 1.19] | Inferior by $\geq 20\%$   | <0.001 |
| [MoP] Exeter V40 Ultima Cemented Cup                          | 916    | 2.29 | 1.38  | [ 0.47 , 2.29] | Inferior by $\geq 20\%$   | 0.003  |
| [MoP] Furlong Cemented Stem JRI Cemented Cup                  | 1,041  | 1.99 | 1.09  | [ 0.31 , 1.86] | Inferior by $\geq 20\%$   | 0.006  |
| [MoP] Furlong HAC Stem CSF                                    | 4,138  | 3.06 | 2.15  | [ 1.63 , 2.67] | Inferior by $\geq 100\%$  | <0.001 |
| [MoP] Furlong HAC Stem Furlong HAC CSF Plus                   | 731    | 3.34 | 2.44  | [ 1.72 , 3.16] | Inferior by $\geq 100\%$  | <0.001 |
| [MoP] Furlong HAC Stem Furlong Threaded                       | 348    | 3.27 | 2.37  | [ 0.75 , 3.98] | Inferior by $\geq 20\%$   | 0.004  |
| [MoP] MS-30 Original ME Muller Low Profile Cup                | 334    | 1.74 | 0.83  | [-0.27 , 1.93] | Non-inferiority not shown | 0.139  |
| [MoP] Mem Original ME Muller Low Profile Cup                  | 286    | 0.86 | -0.05 | [-1.06 , 0.97] | Non-inferiority not shown | 0.926  |
| [MoP] Muller Straight Stem Centerpulse Muller                 | 316    | 3.15 | 2.24  | [ 0.56 , 3.92] | Inferior by $\geq 20\%$   | 0.009  |
| [MoP] Muller Straight Stem Original ME Muller Low Profile Cup | 646    | 2.06 | 1.16  | [ 0.27 , 2.04] | Inferior by $\geq 20\%$   | 0.010  |
| [MoP] Muller-Biomet Apollo                                    | 1,089  | 1.70 | 0.80  | [ 0.13 , 1.46] | Non-inferiority not shown | 0.019  |
| [MoP] Muller-Biomet Original ME Muller Low Profile Cup        | 267    | 2.22 | 1.32  | [ 0.21 , 2.42] | Inferior by $\geq 20\%$   | 0.019  |
| [MoP] Omnifit Cemented Stem ODC                               | 708    | 2.78 | 1.88  | [ 0.73 , 3.03] | Inferior by $\geq 20\%$   | 0.001  |
| [MoP] Omnifit Cementless Stem Secure Fit Cementless Cup       | 255    | 1.42 | 0.52  | [-0.90 , 1.93] | Non-inferiority not shown | 0.476  |
| [MoP] Omnifit Cementless Stem Trident                         | 321    | 6.51 | 5.61  | [ 3.28 , 7.94] | Inferior by $\geq 100\%$  | <0.001 |
| [MoP] SL-Plus Cementless Stem EP-Fit Plus                     | 1,230  | 4.42 | 3.52  | [ 2.58 , 4.46] | Inferior by $\geq 100\%$  | <0.001 |
| [MoP] SP II Cemented Stem Interplanta                         | 455    | 4.00 | 3.09  | [ 1.54 , 4.65] | Inferior by $\geq 100\%$  | <0.001 |
| [MoP] Stanmore Modular Stem SHP Cup                           | 480    | 1.46 | 0.55  | [-0.33 , 1.44] | Non-inferiority not shown | 0.222  |
| [MoP] Stanmore Modular Stem Stanmore-Arcom Cup                | 1,908  | 1.97 | 1.06  | [ 0.51 , 1.61] | Inferior by $\geq 20\%$   | <0.001 |
| [MoP] Synergy Cementless Stem Reflection Cementless           | 1,002  | 1.75 | 0.85  | [ 0.10 , 1.60] | Non-inferiority not shown | 0.027  |
| [MoP] Taperloc Cementless Stem Exceed                         | 370    | 2.27 | 1.37  | [ 0.04 , 2.69] | Non-inferiority not shown | 0.043  |
| [MoP] Taperloc Cementless Stem Exceed ABT                     | 513    | 2.52 | 1.61  | [ 0.96 , 2.26] | Inferior by $\geq 100\%$  | <0.001 |
| [MoP] Versys Cementless Stem Trilogy                          | 714    | 4.81 | 3.91  | [ 2.48 , 5.33] | Inferior by $\geq 100\%$  | <0.001 |



**Supplementary table 1d: Difference in Kaplan-Meier failure estimate between a contemporary reference and implants with at least 250 at risk at 10 years since primary**

| Stem/cup brand                                                | Number at risk | Cumulative failure (%) | Difference in failure (%) | 95% CI          | Equivalence status        | p-value |
|---------------------------------------------------------------|----------------|------------------------|---------------------------|-----------------|---------------------------|---------|
| [MoP] Exeter V40 Elite Plus Ogee                              | 3,580          | 2.14                   | [REFERENCE]               |                 |                           |         |
| [CoC] ABG II Monolithic Cementless Stem ABG II Cementless Cup | 695            | 4.42                   | 2.28                      | [ 0.96 , 3.60]  | Inferior by $\geq 20\%$   | 0.001   |
| [CoC] ABG II Monolithic Cementless Stem Trident               | 412            | 4.15                   | 2.01                      | [ 0.68 , 3.34]  | Inferior by $\geq 20\%$   | 0.003   |
| [CoC] Accolade Trident                                        | 454            | 4.38                   | 2.24                      | [ 1.48 , 3.00]  | Inferior by $\geq 20\%$   | <0.001  |
| [CoC] Corail Duraloc Option                                   | 383            | 4.45                   | 2.31                      | [ 0.93 , 3.68]  | Inferior by $\geq 20\%$   | 0.001   |
| [CoC] Corail Pinnacle                                         | 886            | 3.90                   | 1.76                      | [ 1.23 , 2.29]  | Inferior by $\geq 20\%$   | <0.001  |
| [CoC] Exeter V40 ABG II Cementless Cup                        | 440            | 2.66                   | 0.52                      | [-0.54 , 1.58]  | Non-inferiority not shown | 0.334   |
| [CoC] Exeter V40 Trident                                      | 1,846          | 2.59                   | 0.44                      | [-0.04 , 0.93]  | Non-inferiority not shown | 0.072   |
| [CoC] Furlong HAC Stem CSF                                    | 829            | 4.37                   | 2.22                      | [ 1.13 , 3.32]  | Inferior by $\geq 20\%$   | <0.001  |
| [CoC] SL-Plus Cementless Stem EP-Fit Plus                     | 288            | 6.94                   | 4.80                      | [ 3.25 , 6.35]  | Inferior by $\geq 100\%$  | <0.001  |
| [CoP] C-Stem Cemented Stem Wroblewski Golf Ball               | 317            | 2.51                   | 0.36                      | [-0.88 , 1.61]  | Non-inferiority not shown | 0.567   |
| [CoP] Exeter V40 Exeter Contemporary Flanged                  | 269            | 2.10                   | -0.05                     | [-0.90 , 0.80]  | Non-inferiority not shown | 0.913   |
| [CoP] Exeter V40 Trilogy                                      | 494            | 1.91                   | -0.23                     | [-0.96 , 0.50]  | Non-inferiority not shown | 0.537   |
| [CoP] Furlong HAC Stem CSF                                    | 2,520          | 2.65                   | 0.51                      | [-0.02 , 1.03]  | Non-inferiority not shown | 0.058   |
| [MoP] ABG II Monolithic Cementless Stem ABG II Cementless Cup | 278            | 4.37                   | 2.22                      | [ 0.21 , 4.24]  | Non-inferiority not shown | 0.031   |
| [MoP] C-Stem Cemented Stem Charnley Ogee                      | 293            | 2.25                   | 0.11                      | [-0.97 , 1.19]  | Non-inferiority not shown | 0.846   |
| [MoP] C-Stem Cemented Stem Charnley and Elite Plus LPW        | 725            | 2.45                   | 0.30                      | [-0.54 , 1.14]  | Non-inferiority not shown | 0.481   |
| [MoP] C-Stem Cemented Stem Elite Plus Cemented Cup            | 267            | 2.49                   | 0.35                      | [-1.08 , 1.79]  | Non-inferiority not shown | 0.632   |
| [MoP] C-Stem Cemented Stem Elite Plus Ogee                    | 882            | 2.57                   | 0.43                      | [-0.33 , 1.19]  | Non-inferiority not shown | 0.271   |
| [MoP] C-Stem Cemented Stem Opera                              | 356            | 3.79                   | 1.64                      | [ 0.21 , 3.08]  | Non-inferiority not shown | 0.025   |
| [MoP] C-Stem Cemented Stem Wroblewski Golf Ball               | 259            | 2.47                   | 0.33                      | [-0.94 , 1.59]  | Non-inferiority not shown | 0.614   |
| [MoP] CPT Elite Plus Ogee                                     | 408            | 3.16                   | 1.01                      | [ 0.04 , 1.98]  | Non-inferiority not shown | 0.041   |
| [MoP] CPT Trilogy                                             | 1,135          | 4.29                   | 2.14                      | [ 1.42 , 2.86]  | Inferior by $\geq 20\%$   | <0.001  |
| [MoP] CPT ZCA                                                 | 1,233          | 3.71                   | 1.57                      | [ 0.95 , 2.19]  | Inferior by $\geq 20\%$   | <0.001  |
| [MoP] Charnley Cemented Stem Charnley Cemented Cup            | 1,751          | 3.52                   | 1.38                      | [ 0.69 , 2.07]  | Inferior by $\geq 20\%$   | <0.001  |
| [MoP] Charnley Cemented Stem Charnley Ogee                    | 3,102          | 3.93                   | 1.78                      | [ 1.23 , 2.34]  | Inferior by $\geq 20\%$   | <0.001  |
| [MoP] Charnley Cemented Stem Charnley and Elite Plus LPW      | 2,284          | 2.43                   | 0.29                      | [-0.25 , 0.83]  | Non-inferiority not shown | 0.297   |
| [MoP] Charnley Cemented Stem Opera                            | 254            | 3.99                   | 1.85                      | [ 0.19 , 3.51]  | Non-inferiority not shown | 0.029   |
| [MoP] Charnley Cemented Stem Wroblewski Golf Ball             | 419            | 2.42                   | 0.28                      | [-0.81 , 1.36]  | Non-inferiority not shown | 0.619   |
| [MoP] Corail Duraloc Cementless Cup                           | 1,200          | 5.37                   | 3.22                      | [ 2.31 , 4.14]  | Inferior by $\geq 100\%$  | <0.001  |
| [MoP] Corail Pinnacle                                         | 1,681          | 3.05                   | 0.91                      | [ 0.45 , 1.36]  | Inferior by $\geq 20\%$   | <0.001  |
| [MoP] Elite Plus Cemented Stem Elite Plus Ogee                | 351            | 2.03                   | -0.11                     | [-1.41 , 1.19]  | Non-inferiority not shown | 0.865   |
| [MoP] Exeter V40 ABG II Cementless Cup                        | 429            | 2.62                   | 0.48                      | [-0.77 , 1.73]  | Non-inferiority not shown | 0.456   |
| [MoP] Exeter V40 Cenator Cemented Cup                         | 694            | 2.64                   | 0.49                      | [-0.29 , 1.28]  | Non-inferiority not shown | 0.219   |
| [MoP] Exeter V40 Charnley Ogee                                | 561            | 1.62                   | -0.52                     | [-1.26 , 0.21]  | Non-inferior              | 0.163   |
| [MoP] Exeter V40 Charnley and Elite Plus LPW                  | 404            | 2.44                   | 0.30                      | [-0.53 , 1.12]  | Non-inferiority not shown | 0.484   |
| [MoP] Exeter V40 Duraloc Cementless Cup                       | 451            | 4.19                   | 2.05                      | [ 0.62 , 3.48]  | Inferior by $\geq 20\%$   | 0.005   |
| [MoP] Exeter V40 Elite Plus Cemented Cup                      | 725            | 1.44                   | -0.70                     | [-1.31 , -0.09] | Non-inferior              | 0.024   |
| [MoP] Exeter V40 Exeter Contemporary Flanged                  | 4,653          | 2.28                   | 0.13                      | [-0.23 , 0.49]  | Non-inferiority not shown | 0.469   |

|                                                     |       |      |      |                |                           |        |
|-----------------------------------------------------|-------|------|------|----------------|---------------------------|--------|
| [MoP] Exeter V40 Exeter Contemporary Hooded         | 2,355 | 4.12 | 1.97 | [ 1.45 , 2.49] | Inferior by $\geq 20\%$   | <0.001 |
| [MoP] Exeter V40 Exeter Duration                    | 2,967 | 3.71 | 1.56 | [ 1.05 , 2.07] | Inferior by $\geq 20\%$   | <0.001 |
| [MoP] Exeter V40 Opera                              | 443   | 3.23 | 1.09 | [-0.03 , 2.21] | Non-inferiority not shown | 0.057  |
| [MoP] Exeter V40 Reflection Cementless              | 393   | 4.18 | 2.03 | [ 0.76 , 3.30] | Inferior by $\geq 20\%$   | 0.002  |
| [MoP] Exeter V40 Trident                            | 1,116 | 2.71 | 0.56 | [ 0.05 , 1.08] | Non-inferiority not shown | 0.031  |
| [MoP] Exeter V40 Trilogy                            | 1,538 | 2.49 | 0.35 | [-0.17 , 0.87] | Non-inferiority not shown | 0.191  |
| [MoP] Exeter V40 Ultima Cemented Cup                | 498   | 3.27 | 1.12 | [-0.03 , 2.27] | Non-inferiority not shown | 0.056  |
| [MoP] Furlong Cemented Stem JRI Cemented Cup        | 584   | 3.23 | 1.09 | [ 0.01 , 2.17] | Non-inferiority not shown | 0.048  |
| [MoP] Furlong HAC Stem CSF                          | 1,697 | 4.41 | 2.27 | [ 1.61 , 2.92] | Inferior by $\geq 20\%$   | <0.001 |
| [MoP] Muller-Biomet Apollo                          | 371   | 2.67 | 0.53 | [-0.56 , 1.62] | Non-inferiority not shown | 0.345  |
| [MoP] Omnifit Cemented Stem ODC                     | 458   | 3.89 | 1.74 | [ 0.35 , 3.14] | Non-inferiority not shown | 0.014  |
| [MoP] SP II Cemented Stem Interplanta               | 258   | 5.45 | 3.31 | [ 1.32 , 5.30] | Inferior by $\geq 20\%$   | 0.001  |
| [MoP] Stanmore Modular Stem Stanmore-Arcom Cup      | 669   | 2.52 | 0.38 | [-0.29 , 1.04] | Non-inferiority not shown | 0.264  |
| [MoP] Synergy Cementless Stem Reflection Cementless | 322   | 2.38 | 0.24 | [-0.80 , 1.28] | Non-inferiority not shown | 0.651  |
| [MoP] Versys Cementless Stem Trilogy                | 464   | 5.47 | 3.32 | [ 1.77 , 4.87] | Inferior by $\geq 20\%$   | <0.001 |

**Supplemental table 2a: Difference in Kaplan-Meier failure estimate between a contemporary reference and implants with at least 250 at risk at 3 years since primary in females**

| Stem/cup brand                                                | Number at risk | Cumulative failure (%) | Difference in failure (%) | 95% CI         | Equivalence status        | p-value |
|---------------------------------------------------------------|----------------|------------------------|---------------------------|----------------|---------------------------|---------|
| [CoP] MS-30 Original ME Muller Low Profile Cup                | 1,096          | 0.41                   | [REFERENCE]               |                |                           |         |
| [CoC] ABG II Monolithic Cementless Stem ABG II Cementless Cup | 502            | 1.36                   | 0.96                      | [-0.11 , 2.02] | Non-inferiority not shown | 0.079   |
| [CoC] ABG II Monolithic Cementless Stem Trident               | 465            | 2.24                   | 1.84                      | [ 0.48 , 3.19] | Inferior by $\geq 100\%$  | 0.008   |
| [CoC] Accolade Trident                                        | 3,662          | 1.78                   | 1.37                      | [ 0.83 , 1.92] | Inferior by $\geq 100\%$  | <0.001  |
| [CoC] Bimetric Cementless Stem Exceed ABT                     | 511            | 1.18                   | 0.77                      | [-0.17 , 1.70] | Non-inferiority not shown | 0.108   |
| [CoC] C-Stem AMT Cemented Stem Pinnacle                       | 487            | 1.06                   | 0.65                      | [-0.22 , 1.52] | Non-inferiority not shown | 0.143   |
| [CoC] CPT Continuum                                           | 481            | 1.17                   | 0.76                      | [-0.13 , 1.64] | Non-inferiority not shown | 0.093   |
| [CoC] CPT Trilogy AB                                          | 305            | 0.97                   | 0.56                      | [-0.59 , 1.71] | Non-inferiority not shown | 0.339   |
| [CoC] Corail Delta TT                                         | 453            | 1.90                   | 1.49                      | [ 0.44 , 2.54] | Inferior by $\geq 100\%$  | 0.005   |
| [CoC] Corail DeltaMotion                                      | 696            | 1.22                   | 0.81                      | [-0.02 , 1.65] | Non-inferiority not shown | 0.056   |
| [CoC] Corail Duraloc Option                                   | 580            | 1.68                   | 1.27                      | [ 0.18 , 2.36] | Inferior by $\geq 20\%$   | 0.023   |
| [CoC] Corail Pinnacle                                         | 14,431         | 1.67                   | 1.26                      | [ 0.85 , 1.66] | Inferior by $\geq 100\%$  | <0.001  |
| [CoC] Corail Pinnacle Gription                                | 292            | 2.28                   | 1.87                      | [ 0.57 , 3.17] | Inferior by $\geq 100\%$  | 0.005   |
| [CoC] Corail Trinity                                          | 256            | 0.21                   | -0.20                     | [-0.74 , 0.35] | Non-inferiority not shown | 0.474   |
| [CoC] Excia Cementless Plasmacup SC                           | 471            | 1.52                   | 1.11                      | [ 0.06 , 2.17] | Non-inferiority not shown | 0.038   |
| [CoC] Exeter V40 ABG II Cementless Cup                        | 887            | 0.40                   | -0.01                     | [-0.54 , 0.52] | Non-inferiority not shown | 0.964   |
| [CoC] Exeter V40 Trident                                      | 5,950          | 0.91                   | 0.51                      | [ 0.08 , 0.93] | Non-inferiority not shown | 0.020   |
| [CoC] Furlong Evolution Cementless Furlong HAC CSF Plus       | 323            | 0.90                   | 0.49                      | [-0.17 , 1.16] | Non-inferiority not shown | 0.147   |
| [CoC] Furlong HAC Stem CSF                                    | 881            | 1.54                   | 1.13                      | [ 0.26 , 2.01] | Inferior by $\geq 20\%$   | 0.011   |
| [CoC] Furlong HAC Stem Furlong HAC CSF Plus                   | 4,954          | 1.49                   | 1.08                      | [ 0.62 , 1.54] | Inferior by $\geq 100\%$  | <0.001  |
| [CoC] M/L Taper Cementless Continuum                          | 689            | 1.52                   | 1.11                      | [ 0.24 , 1.98] | Inferior by $\geq 20\%$   | 0.012   |
| [CoC] Metafix Stem Trinity                                    | 469            | 1.43                   | 1.03                      | [ 0.13 , 1.93] | Inferior by $\geq 20\%$   | 0.025   |
| [CoC] Omnifit Cementless Stem Trident                         | 267            | 2.20                   | 1.79                      | [ 0.01 , 3.57] | Non-inferiority not shown | 0.048   |
| [CoC] Polarstem Cementless R3 Cementless                      | 460            | 1.10                   | 0.70                      | [-0.19 , 1.59] | Non-inferiority not shown | 0.125   |
| [CoC] S-Rom Cementless Stem Pinnacle                          | 327            | 2.46                   | 2.06                      | [ 0.50 , 3.61] | Inferior by $\geq 100\%$  | 0.010   |
| [CoC] SL-Plus Cementless Stem EP-Fit Plus                     | 602            | 1.75                   | 1.34                      | [ 0.26 , 2.43] | Inferior by $\geq 20\%$   | 0.015   |
| [CoC] SPS Modular April - Ceramic                             | 302            | 2.39                   | 1.98                      | [ 0.31 , 3.66] | Inferior by $\geq 20\%$   | 0.020   |
| [CoC] Summit Cementless Stem Pinnacle                         | 269            | 1.14                   | 0.73                      | [-0.44 , 1.90] | Non-inferiority not shown | 0.223   |
| [CoC] Taperloc Cementless Stem Exceed ABT                     | 3,728          | 1.43                   | 1.02                      | [ 0.54 , 1.50] | Inferior by $\geq 100\%$  | <0.001  |
| [CoC] miniHip Trinity                                         | 441            | 1.11                   | 0.70                      | [-0.19 , 1.60] | Non-inferiority not shown | 0.125   |
| [CoP] Accolade Trident                                        | 1,760          | 1.39                   | 0.98                      | [ 0.40 , 1.56] | Inferior by $\geq 20\%$   | 0.001   |
| [CoP] C-Stem Cemented Stem Elite Plus Ogee                    | 342            | 0.28                   | -0.12                     | [-0.79 , 0.54] | Non-inferiority not shown | 0.716   |
| [CoP] C-Stem Cemented Stem Marathon                           | 626            | 1.01                   | 0.60                      | [-0.13 , 1.33] | Non-inferiority not shown | 0.108   |
| [CoP] C-Stem Cemented Stem Opera                              | 445            | 0.22                   | -0.19                     | [-0.75 , 0.38] | Non-inferiority not shown | 0.515   |
| [CoP] C-Stem Cemented Stem Wroblewski Golf Ball               | 517            | 0.53                   | 0.12                      | [-0.57 , 0.82] | Non-inferiority not shown | 0.732   |
| [CoP] CPT Trilogy                                             | 871            | 1.24                   | 0.84                      | [ 0.27 , 1.40] | Inferior by $\geq 20\%$   | 0.004   |
| [CoP] Corail Charnley and Elite Plus LPW                      | 376            | 2.14                   | 1.73                      | [ 0.30 , 3.16] | Inferior by $\geq 20\%$   | 0.018   |
| [CoP] Corail Elite Plus Cemented Cup                          | 267            | 0.91                   | 0.50                      | [-0.58 , 1.58] | Non-inferiority not shown | 0.367   |
| [CoP] Corail Elite Plus Ogee                                  | 268            | 1.67                   | 1.26                      | [-0.23 , 2.76] | Non-inferiority not shown | 0.098   |
| [CoP] Corail Marathon                                         | 787            | 0.72                   | 0.31                      | [-0.26 , 0.89] | Non-inferiority not shown | 0.285   |

|                                                            |       |      |       |                |                           |        |
|------------------------------------------------------------|-------|------|-------|----------------|---------------------------|--------|
| [CoP] Corail Pinnacle                                      | 4,637 | 1.27 | 0.86  | [ 0.43 , 1.29] | Inferior by $\geq 100\%$  | <0.001 |
| [CoP] Corail Trilogy                                       | 437   | 0.87 | 0.46  | [-0.46 , 1.39] | Non-inferiority not shown | 0.324  |
| [CoP] Exeter V40 Charnley and Elite Plus LPW               | 374   | 1.99 | 1.58  | [ 0.30 , 2.86] | Inferior by $\geq 20\%$   | 0.015  |
| [CoP] Exeter V40 Elite Plus Ogee                           | 655   | 0.57 | 0.16  | [-0.45 , 0.77] | Non-inferiority not shown | 0.611  |
| [CoP] Exeter V40 Exeter Contemporary Flanged               | 1,849 | 1.14 | 0.73  | [ 0.18 , 1.28] | Inferior by $\geq 20\%$   | 0.009  |
| [CoP] Exeter V40 Exeter Contemporary Hooded                | 482   | 1.83 | 1.42  | [ 0.29 , 2.56] | Inferior by $\geq 20\%$   | 0.014  |
| [CoP] Exeter V40 Exeter Duration                           | 476   | 0.93 | 0.52  | [-0.37 , 1.40] | Non-inferiority not shown | 0.251  |
| [CoP] Exeter V40 Exeter X3 Rimfit                          | 1,264 | 0.76 | 0.35  | [-0.14 , 0.84] | Non-inferiority not shown | 0.164  |
| [CoP] Exeter V40 Marathon                                  | 284   | 0.92 | 0.51  | [-0.48 , 1.49] | Non-inferiority not shown | 0.312  |
| [CoP] Exeter V40 Pinnacle                                  | 292   | 1.12 | 0.71  | [-0.20 , 1.62] | Non-inferiority not shown | 0.127  |
| [CoP] Exeter V40 Trident                                   | 2,940 | 0.93 | 0.52  | [ 0.08 , 0.96] | Inferior by $\geq 20\%$   | 0.020  |
| [CoP] Exeter V40 Trilogy                                   | 1,182 | 0.60 | 0.19  | [-0.36 , 0.74] | Non-inferiority not shown | 0.491  |
| [CoP] Exeter V40 Tritanium                                 | 250   | 1.74 | 1.33  | [ 0.12 , 2.55] | Inferior by $\geq 20\%$   | 0.032  |
| [CoP] Furlong HAC Stem CSF                                 | 3,748 | 1.32 | 0.91  | [ 0.41 , 1.41] | Inferior by $\geq 100\%$  | <0.001 |
| [CoP] Furlong HAC Stem Furlong HAC CSF Plus                | 840   | 2.36 | 1.95  | [ 0.99 , 2.91] | Inferior by $\geq 100\%$  | <0.001 |
| [CoP] SL-Plus Cementless Stem Bicon-Plus                   | 342   | 1.66 | 1.25  | [-0.11 , 2.61] | Non-inferiority not shown | 0.073  |
| [CoP] SL-Plus Cementless Stem EP-Fit Plus                  | 593   | 1.93 | 1.52  | [ 0.38 , 2.66] | Inferior by $\geq 20\%$   | 0.009  |
| [CoP] Stanmore Modular Stem Stanmore-Arcom Cup             | 262   | 1.58 | 1.17  | [-0.25 , 2.59] | Non-inferiority not shown | 0.106  |
| [CoP] Taperloc Cementless Stem Exceed ABT                  | 1,062 | 0.99 | 0.59  | [ 0.01 , 1.16] | Non-inferiority not shown | 0.046  |
| [MoP] Accolade Trident                                     | 5,487 | 1.75 | 1.34  | [ 0.86 , 1.82] | Inferior by $\geq 100\%$  | <0.001 |
| [MoP] Anthology R3 Cementless                              | 729   | 1.46 | 1.05  | [ 0.29 , 1.81] | Inferior by $\geq 20\%$   | 0.007  |
| [MoP] C-Stem AMT Cemented Stem Charnley and Elite Plus LPW | 1,437 | 0.91 | 0.50  | [-0.07 , 1.07] | Non-inferiority not shown | 0.085  |
| [MoP] C-Stem AMT Cemented Stem Elite Plus Cemented Cup     | 438   | 0.61 | 0.20  | [-0.57 , 0.97] | Non-inferiority not shown | 0.614  |
| [MoP] C-Stem AMT Cemented Stem Elite Plus Ogee             | 1,135 | 0.84 | 0.43  | [-0.15 , 1.01] | Non-inferiority not shown | 0.149  |
| [MoP] C-Stem AMT Cemented Stem Marathon                    | 751   | 0.88 | 0.47  | [-0.10 , 1.04] | Non-inferiority not shown | 0.108  |
| [MoP] C-Stem AMT Cemented Stem Pinnacle                    | 985   | 1.24 | 0.84  | [ 0.25 , 1.42] | Inferior by $\geq 20\%$   | 0.005  |
| [MoP] C-Stem Cemented Stem Charnley Ogee                   | 597   | 1.48 | 1.07  | [ 0.09 , 2.05] | Inferior by $\geq 20\%$   | 0.033  |
| [MoP] C-Stem Cemented Stem Charnley and Elite Plus LPW     | 1,119 | 1.17 | 0.76  | [ 0.05 , 1.46] | Non-inferiority not shown | 0.035  |
| [MoP] C-Stem Cemented Stem Duraloc Cementless Cup          | 420   | 1.59 | 1.18  | [-0.04 , 2.41] | Non-inferiority not shown | 0.058  |
| [MoP] C-Stem Cemented Stem Elite Plus Cemented Cup         | 390   | 0.47 | 0.06  | [-0.68 , 0.80] | Non-inferiority not shown | 0.870  |
| [MoP] C-Stem Cemented Stem Elite Plus Ogee                 | 1,985 | 0.69 | 0.28  | [-0.21 , 0.78] | Non-inferiority not shown | 0.257  |
| [MoP] C-Stem Cemented Stem Marathon                        | 959   | 0.63 | 0.22  | [-0.30 , 0.73] | Non-inferiority not shown | 0.407  |
| [MoP] C-Stem Cemented Stem Opera                           | 836   | 0.68 | 0.27  | [-0.38 , 0.91] | Non-inferiority not shown | 0.417  |
| [MoP] C-Stem Cemented Stem Pinnacle                        | 301   | 1.59 | 1.19  | [-0.13 , 2.50] | Non-inferiority not shown | 0.077  |
| [MoP] C-Stem Cemented Stem Wroblewski Golf Ball            | 625   | 0.74 | 0.33  | [-0.41 , 1.07] | Non-inferiority not shown | 0.379  |
| [MoP] CCA Cemented Stem CCB Cup                            | 793   | 0.62 | 0.21  | [-0.40 , 0.82] | Non-inferiority not shown | 0.501  |
| [MoP] CLS Cementless Stem Allofit                          | 336   | 1.93 | 1.52  | [ 0.06 , 2.99] | Non-inferiority not shown | 0.041  |
| [MoP] CLS Cementless Stem Trilogy                          | 321   | 3.16 | 2.75  | [ 0.88 , 4.62] | Inferior by $\geq 100\%$  | 0.004  |
| [MoP] CMK Modular Cemented Stem CMK Cemented Cup           | 319   | 0.30 | -0.11 | [-0.79 , 0.58] | Non-inferiority not shown | 0.755  |
| [MoP] CPCS Opera                                           | 804   | 0.95 | 0.55  | [-0.20 , 1.30] | Non-inferiority not shown | 0.153  |
| [MoP] CPCS Polarcup Cementless                             | 259   | 0.76 | 0.35  | [-0.76 , 1.46] | Non-inferiority not shown | 0.535  |
| [MoP] CPCS Reflection Cemented                             | 264   | 1.10 | 0.69  | [-0.26 , 1.64] | Non-inferiority not shown | 0.156  |
| [MoP] CPS Plus Cenator Cemented Cup                        | 268   | 0.37 | -0.04 | [-0.85 , 0.77] | Non-inferiority not shown | 0.931  |
| [MoP] CPS Plus Opera                                       | 327   | 1.17 | 0.76  | [-0.43 , 1.96] | Non-inferiority not shown | 0.211  |
| [MoP] CPT Allofit                                          | 485   | 0.32 | -0.09 | [-0.66 , 0.48] | Non-inferiority not shown | 0.752  |
| [MoP] CPT Continuum                                        | 315   | 2.66 | 2.25  | [ 1.17 , 3.33] | Inferior by $\geq 100\%$  | <0.001 |

|                                                          |        |      |       |                |                           |        |
|----------------------------------------------------------|--------|------|-------|----------------|---------------------------|--------|
| [MoP] CPT Elite Plus Ogee                                | 1,550  | 1.24 | 0.83  | [ 0.21 , 1.46] | Inferior by $\geq 20\%$   | 0.009  |
| [MoP] CPT Exeter Contemporary Flanged                    | 283    | 2.17 | 1.76  | [ 0.31 , 3.21] | Inferior by $\geq 20\%$   | 0.017  |
| [MoP] CPT Opera                                          | 268    | 1.06 | 0.66  | [-0.59 , 1.91] | Non-inferiority not shown | 0.303  |
| [MoP] CPT Original ME Muller Low Profile Cup             | 600    | 1.30 | 0.89  | [ 0.00 , 1.78] | Non-inferiority not shown | 0.050  |
| [MoP] CPT Pinnacle                                       | 511    | 1.59 | 1.19  | [ 0.09 , 2.28] | Inferior by $\geq 20\%$   | 0.033  |
| [MoP] CPT Trabecular Metal Modular Cementless Cup        | 645    | 1.72 | 1.32  | [ 0.40 , 2.23] | Inferior by $\geq 20\%$   | 0.005  |
| [MoP] CPT Trilogy                                        | 5,622  | 1.20 | 0.79  | [ 0.35 , 1.22] | Inferior by $\geq 20\%$   | <0.001 |
| [MoP] CPT Trilogy IT                                     | 304    | 2.93 | 2.52  | [ 1.48 , 3.57] | Inferior by $\geq 100\%$  | <0.001 |
| [MoP] CPT ZCA                                            | 5,377  | 1.34 | 0.93  | [ 0.49 , 1.38] | Inferior by $\geq 100\%$  | <0.001 |
| [MoP] Centrament Chirulen                                | 294    | 0.00 | --    | [ -- , -- ]    | No failures to date       |        |
| [MoP] Charnley Cemented Stem Charnley Cemented Cup       | 2,552  | 0.97 | 0.56  | [ 0.04 , 1.07] | Non-inferiority not shown | 0.033  |
| [MoP] Charnley Cemented Stem Charnley Ogee               | 5,409  | 1.08 | 0.67  | [ 0.22 , 1.11] | Inferior by $\geq 20\%$   | 0.003  |
| [MoP] Charnley Cemented Stem Charnley and Elite Plus LPW | 4,125  | 0.61 | 0.20  | [-0.22 , 0.63] | Non-inferiority not shown | 0.352  |
| [MoP] Charnley Cemented Stem Opera                       | 823    | 0.70 | 0.29  | [-0.37 , 0.96] | Non-inferiority not shown | 0.385  |
| [MoP] Charnley Cemented Stem Wroblewski Golf Ball        | 609    | 1.53 | 1.12  | [ 0.11 , 2.12] | Inferior by $\geq 20\%$   | 0.029  |
| [MoP] Charnley Modular Charnley and Elite Plus LPW       | 275    | 0.36 | -0.05 | [-0.84 , 0.75] | Non-inferiority not shown | 0.908  |
| [MoP] Corail Charnley and Elite Plus LPW                 | 543    | 0.83 | 0.42  | [-0.33 , 1.17] | Non-inferiority not shown | 0.274  |
| [MoP] Corail Duraloc Cementless Cup                      | 2,139  | 1.30 | 0.89  | [ 0.30 , 1.48] | Inferior by $\geq 20\%$   | 0.003  |
| [MoP] Corail Elite Plus Cemented Cup                     | 629    | 0.42 | 0.02  | [-0.58 , 0.62] | Non-inferiority not shown | 0.955  |
| [MoP] Corail Elite Plus Ogee                             | 937    | 1.08 | 0.67  | [-0.01 , 1.36] | Non-inferiority not shown | 0.055  |
| [MoP] Corail Exeter Contemporary Flanged                 | 376    | 0.95 | 0.54  | [-0.37 , 1.45] | Non-inferiority not shown | 0.246  |
| [MoP] Corail Marathon                                    | 1,873  | 0.80 | 0.39  | [-0.08 , 0.87] | Non-inferiority not shown | 0.107  |
| [MoP] Corail Pinnacle                                    | 17,132 | 1.26 | 0.85  | [ 0.47 , 1.23] | Inferior by $\geq 100\%$  | <0.001 |
| [MoP] Corail Trident                                     | 385    | 1.01 | 0.60  | [-0.23 , 1.43] | Non-inferiority not shown | 0.154  |
| [MoP] Corail Trilogy                                     | 1,066  | 0.90 | 0.50  | [-0.15 , 1.14] | Non-inferiority not shown | 0.129  |
| [MoP] Elite Plus Cemented Stem Elite Plus Ogee           | 402    | 0.49 | 0.08  | [-0.68 , 0.84] | Non-inferiority not shown | 0.842  |
| [MoP] Exeter V40 ABG II Cementless Cup                   | 477    | 0.80 | 0.39  | [-0.47 , 1.25] | Non-inferiority not shown | 0.373  |
| [MoP] Exeter V40 Cenator Cemented Cup                    | 1,425  | 1.45 | 1.04  | [ 0.35 , 1.73] | Inferior by $\geq 20\%$   | 0.003  |
| [MoP] Exeter V40 Charnley Ogee                           | 1,068  | 1.00 | 0.59  | [-0.08 , 1.26] | Non-inferiority not shown | 0.083  |
| [MoP] Exeter V40 Charnley and Elite Plus LPW             | 1,811  | 1.31 | 0.90  | [ 0.31 , 1.50] | Inferior by $\geq 20\%$   | 0.003  |
| [MoP] Exeter V40 Duraloc Cementless Cup                  | 708    | 1.10 | 0.69  | [-0.15 , 1.53] | Non-inferiority not shown | 0.106  |
| [MoP] Exeter V40 EP-Fit Plus                             | 333    | 1.17 | 0.77  | [-0.43 , 1.96] | Non-inferiority not shown | 0.210  |
| [MoP] Exeter V40 Elite Plus Cemented Cup                 | 2,389  | 0.45 | 0.04  | [-0.39 , 0.48] | Non-inferiority not shown | 0.842  |
| [MoP] Exeter V40 Elite Plus Ogee                         | 10,898 | 0.70 | 0.29  | [-0.10 , 0.67] | Non-inferiority not shown | 0.142  |
| [MoP] Exeter V40 Exceed                                  | 333    | 0.85 | 0.44  | [-0.58 , 1.46] | Non-inferiority not shown | 0.397  |
| [MoP] Exeter V40 Exceed ABT                              | 284    | 0.94 | 0.53  | [-0.45 , 1.52] | Non-inferiority not shown | 0.290  |
| [MoP] Exeter V40 Exeter Contemporary Flanged             | 27,147 | 0.71 | 0.30  | [-0.07 , 0.67] | Non-inferiority not shown | 0.113  |
| [MoP] Exeter V40 Exeter Contemporary Hooded              | 10,906 | 1.39 | 0.98  | [ 0.58 , 1.39] | Inferior by $\geq 100\%$  | <0.001 |
| [MoP] Exeter V40 Exeter Duration                         | 8,897  | 1.05 | 0.64  | [ 0.23 , 1.05] | Inferior by $\geq 20\%$   | 0.002  |
| [MoP] Exeter V40 Exeter X3 Rimfit                        | 3,408  | 0.73 | 0.32  | [-0.09 , 0.73] | Non-inferiority not shown | 0.123  |
| [MoP] Exeter V40 Furlong HAC CSF Plus                    | 340    | 0.17 | -0.24 | [-0.73 , 0.25] | Non-inferiority not shown | 0.333  |
| [MoP] Exeter V40 Marathon                                | 884    | 0.88 | 0.47  | [-0.12 , 1.06] | Non-inferiority not shown | 0.119  |
| [MoP] Exeter V40 Opera                                   | 1,660  | 0.72 | 0.31  | [-0.22 , 0.84] | Non-inferiority not shown | 0.248  |
| [MoP] Exeter V40 Pinnacle                                | 1,807  | 0.97 | 0.56  | [ 0.05 , 1.07] | Non-inferiority not shown | 0.033  |
| [MoP] Exeter V40 R3 Cementless                           | 363    | 0.90 | 0.49  | [-0.27 , 1.26] | Non-inferiority not shown | 0.205  |
| [MoP] Exeter V40 Reflection Cementless                   | 1,308  | 0.73 | 0.32  | [-0.25 , 0.90] | Non-inferiority not shown | 0.273  |

|                                                               |        |      |       |                |                           |        |
|---------------------------------------------------------------|--------|------|-------|----------------|---------------------------|--------|
| [MoP] Exeter V40 Trabecular Metal Modular Cementless Cup      | 286    | 1.55 | 1.14  | [-0.14 , 2.42] | Non-inferiority not shown | 0.081  |
| [MoP] Exeter V40 Trident                                      | 11,298 | 0.97 | 0.57  | [ 0.18 , 0.95] | Inferior by $\geq 20\%$   | 0.004  |
| [MoP] Exeter V40 Trilogy                                      | 5,145  | 0.83 | 0.43  | [ 0.00 , 0.85] | Non-inferiority not shown | 0.050  |
| [MoP] Exeter V40 Tritanium                                    | 282    | 1.60 | 1.19  | [ 0.12 , 2.25] | Inferior by $\geq 20\%$   | 0.029  |
| [MoP] Exeter V40 Ultima Cemented Cup                          | 777    | 1.10 | 0.69  | [-0.11 , 1.49] | Non-inferiority not shown | 0.090  |
| [MoP] Furlong Cemented Stem JRI Cemented Cup                  | 1,036  | 1.43 | 1.02  | [ 0.24 , 1.81] | Inferior by $\geq 20\%$   | 0.010  |
| [MoP] Furlong HAC Stem CSF                                    | 4,074  | 2.18 | 1.77  | [ 1.22 , 2.33] | Inferior by $\geq 100\%$  | <0.001 |
| [MoP] Furlong HAC Stem Furlong HAC CSF Plus                   | 1,829  | 2.12 | 1.71  | [ 1.07 , 2.36] | Inferior by $\geq 100\%$  | <0.001 |
| [MoP] Furlong HAC Stem Furlong Threaded                       | 311    | 1.83 | 1.42  | [-0.07 , 2.92] | Non-inferiority not shown | 0.062  |
| [MoP] M/L Taper Cementless Continuum                          | 381    | 1.72 | 1.31  | [ 0.24 , 2.37] | Inferior by $\geq 20\%$   | 0.016  |
| [MoP] M/L Taper Cementless Trilogy                            | 281    | 2.08 | 1.68  | [ 0.34 , 3.01] | Inferior by $\geq 20\%$   | 0.014  |
| [MoP] MS-30 Original ME Muller Low Profile Cup                | 522    | 0.28 | -0.13 | [-0.66 , 0.40] | Non-inferiority not shown | 0.637  |
| [MoP] Muller Straight Stem Centerpulse Muller                 | 328    | 0.88 | 0.47  | [-0.58 , 1.52] | Non-inferiority not shown | 0.382  |
| [MoP] Muller Straight Stem Original ME Muller Low Profile Cup | 999    | 0.92 | 0.52  | [-0.12 , 1.15] | Non-inferiority not shown | 0.112  |
| [MoP] Muller-Biomet Apollo                                    | 1,201  | 1.32 | 0.91  | [ 0.19 , 1.63] | Inferior by $\geq 20\%$   | 0.013  |
| [MoP] Muller-Biomet Original ME Muller Low Profile Cup        | 707    | 1.32 | 0.91  | [ 0.02 , 1.80] | Non-inferiority not shown | 0.044  |
| [MoP] Omnifit Cemented Stem ODC                               | 614    | 1.56 | 1.15  | [ 0.13 , 2.18] | Inferior by $\geq 20\%$   | 0.027  |
| [MoP] Omnifit Cementless Stem Trident                         | 251    | 2.95 | 2.55  | [ 0.50 , 4.60] | Inferior by $\geq 100\%$  | 0.015  |
| [MoP] P10 Muller Original ME Muller Low Profile Cup           | 268    | 1.03 | 0.62  | [-0.59 , 1.83] | Non-inferiority not shown | 0.317  |
| [MoP] Polarstem Cementless R3 Cementless                      | 592    | 0.73 | 0.33  | [-0.19 , 0.85] | Non-inferiority not shown | 0.217  |
| [MoP] SL-Plus Cementless Stem EP-Fit Plus                     | 1,198  | 2.40 | 2.00  | [ 1.14 , 2.85] | Inferior by $\geq 100\%$  | <0.001 |
| [MoP] SP II Cemented Stem Interplanta                         | 444    | 1.84 | 1.43  | [ 0.19 , 2.68] | Inferior by $\geq 20\%$   | 0.024  |
| [MoP] Stanmore Modular Stem Elite Plus Cemented Cup           | 367    | 0.26 | -0.15 | [-0.77 , 0.48] | Non-inferiority not shown | 0.647  |
| [MoP] Stanmore Modular Stem SHP Cup                           | 664    | 0.75 | 0.34  | [-0.36 , 1.04] | Non-inferiority not shown | 0.339  |
| [MoP] Stanmore Modular Stem Stanmore-Arcom Cup                | 2,729  | 1.12 | 0.71  | [ 0.19 , 1.23] | Inferior by $\geq 20\%$   | 0.007  |
| [MoP] Synergy Cementless Stem R3 Cementless                   | 554    | 1.00 | 0.59  | [-0.08 , 1.26] | Non-inferiority not shown | 0.082  |
| [MoP] Synergy Cementless Stem Reflection Cementless           | 859    | 0.68 | 0.27  | [-0.38 , 0.92] | Non-inferiority not shown | 0.416  |
| [MoP] Taperfit Cemented Stem Atlas IIIp                       | 327    | 1.14 | 0.73  | [-0.33 , 1.79] | Non-inferiority not shown | 0.177  |
| [MoP] Taperloc Cementless Stem Exceed                         | 318    | 1.20 | 0.79  | [-0.43 , 2.01] | Non-inferiority not shown | 0.204  |
| [MoP] Taperloc Cementless Stem Exceed ABT                     | 2,287  | 1.98 | 1.57  | [ 0.98 , 2.16] | Inferior by $\geq 100\%$  | <0.001 |
| [MoP] Versys Cementless Stem Trilogy                          | 492    | 3.79 | 3.38  | [ 1.71 , 5.05] | Inferior by $\geq 100\%$  | <0.001 |

**Supplemental table 2b: Difference in Kaplan-Meier failure estimate between a contemporary reference and implants with at least 250 at risk at 5 years since primary in females**

| Stem/cup brand                                                | Number at risk | Cumulative failure (%) | Difference in failure (%) | 95% CI         | Equivalence status        | p-value |
|---------------------------------------------------------------|----------------|------------------------|---------------------------|----------------|---------------------------|---------|
| [MoP] Exeter V40 Elite Plus Cemented Cup                      | 1,769          | 0.54                   | [REFERENCE]               |                |                           |         |
| [CoC] ABG II Monolithic Cementless Stem ABG II Cementless Cup | 485            | 1.76                   | 1.22                      | [ 0.05 , 2.40] | Non-inferiority not shown | 0.041   |
| [CoC] ABG II Monolithic Cementless Stem Trident               | 372            | 2.95                   | 2.41                      | [ 0.86 , 3.96] | Inferior by $\geq 100\%$  | 0.002   |
| [CoC] Accolade Trident                                        | 2,906          | 2.56                   | 2.02                      | [ 1.44 , 2.59] | Inferior by $\geq 100\%$  | <0.001  |
| [CoC] Bimetric Cementless Stem Exceed ABT                     | 369            | 1.84                   | 1.30                      | [ 0.13 , 2.48] | Inferior by $\geq 20\%$   | 0.030   |
| [CoC] C-Stem AMT Cemented Stem Pinnacle                       | 268            | 1.80                   | 1.26                      | [ 0.08 , 2.44] | Non-inferiority not shown | 0.037   |
| [CoC] CPT Trilogy AB                                          | 278            | 1.64                   | 1.10                      | [-0.35 , 2.55] | Non-inferiority not shown | 0.138   |
| [CoC] Corail DeltaMotion                                      | 373            | 1.47                   | 0.93                      | [-0.01 , 1.86] | Non-inferiority not shown | 0.051   |
| [CoC] Corail Duraloc Option                                   | 566            | 2.70                   | 2.16                      | [ 0.83 , 3.49] | Inferior by $\geq 100\%$  | 0.001   |
| [CoC] Corail Pinnacle                                         | 9,650          | 2.16                   | 1.62                      | [ 1.26 , 1.97] | Inferior by $\geq 100\%$  | <0.001  |
| [CoC] Excia Cementless Plasmacup SC                           | 266            | 1.52                   | 0.98                      | [-0.04 , 2.01] | Non-inferiority not shown | 0.061   |
| [CoC] Exeter V40 ABG II Cementless Cup                        | 760            | 1.10                   | 0.56                      | [-0.17 , 1.30] | Non-inferiority not shown | 0.133   |
| [CoC] Exeter V40 Trident                                      | 4,852          | 1.27                   | 0.74                      | [ 0.35 , 1.13] | Inferior by $\geq 20\%$   | <0.001  |
| [CoC] Furlong HAC Stem CSF                                    | 839            | 2.11                   | 1.57                      | [ 0.59 , 2.55] | Inferior by $\geq 100\%$  | 0.002   |
| [CoC] Furlong HAC Stem Furlong HAC CSF Plus                   | 3,077          | 1.78                   | 1.24                      | [ 0.81 , 1.68] | Inferior by $\geq 100\%$  | <0.001  |
| [CoC] M/L Taper Cementless Continuum                          | 304            | 1.68                   | 1.14                      | [ 0.25 , 2.04] | Inferior by $\geq 20\%$   | 0.012   |
| [CoC] S-Rom Cementless Stem Pinnacle                          | 251            | 3.21                   | 2.67                      | [ 0.83 , 4.52] | Inferior by $\geq 100\%$  | 0.004   |
| [CoC] SL-Plus Cementless Stem EP-Fit Plus                     | 565            | 3.43                   | 2.89                      | [ 1.42 , 4.36] | Inferior by $\geq 100\%$  | <0.001  |
| [CoC] Taperloc Cementless Stem Exceed ABT                     | 2,243          | 1.79                   | 1.25                      | [ 0.78 , 1.72] | Inferior by $\geq 100\%$  | <0.001  |
| [CoP] Accolade Trident                                        | 828            | 1.84                   | 1.31                      | [ 0.66 , 1.95] | Inferior by $\geq 100\%$  | <0.001  |
| [CoP] C-Stem Cemented Stem Elite Plus Ogee                    | 262            | 0.62                   | 0.08                      | [-0.82 , 0.98] | Non-inferiority not shown | 0.860   |
| [CoP] C-Stem Cemented Stem Marathon                           | 297            | 1.21                   | 0.67                      | [-0.13 , 1.48] | Non-inferiority not shown | 0.099   |
| [CoP] C-Stem Cemented Stem Opera                              | 374            | 1.20                   | 0.66                      | [-0.42 , 1.74] | Non-inferiority not shown | 0.232   |
| [CoP] C-Stem Cemented Stem Wroblewski Golf Ball               | 417            | 0.73                   | 0.19                      | [-0.57 , 0.95] | Non-inferiority not shown | 0.628   |
| [CoP] Corail Charnley and Elite Plus LPW                      | 321            | 2.42                   | 1.88                      | [ 0.37 , 3.39] | Inferior by $\geq 20\%$   | 0.015   |
| [CoP] Corail Marathon                                         | 333            | 1.04                   | 0.50                      | [-0.19 , 1.19] | Non-inferiority not shown | 0.153   |
| [CoP] Corail Pinnacle                                         | 2,442          | 1.71                   | 1.17                      | [ 0.75 , 1.59] | Inferior by $\geq 100\%$  | <0.001  |
| [CoP] Corail Trilogy                                          | 397            | 1.10                   | 0.56                      | [-0.44 , 1.56] | Non-inferiority not shown | 0.269   |
| [CoP] Exeter V40 Elite Plus Ogee                              | 478            | 1.06                   | 0.52                      | [-0.27 , 1.31] | Non-inferiority not shown | 0.198   |
| [CoP] Exeter V40 Exeter Contemporary Flanged                  | 1,225          | 1.60                   | 1.06                      | [ 0.45 , 1.66] | Inferior by $\geq 20\%$   | 0.001   |
| [CoP] Exeter V40 Exeter Contemporary Hooded                   | 358            | 2.31                   | 1.77                      | [ 0.48 , 3.06] | Inferior by $\geq 20\%$   | 0.007   |
| [CoP] Exeter V40 Exeter Duration                              | 405            | 0.93                   | 0.39                      | [-0.47 , 1.24] | Non-inferiority not shown | 0.374   |
| [CoP] Exeter V40 Trident                                      | 1,446          | 1.28                   | 0.75                      | [ 0.29 , 1.20] | Inferior by $\geq 20\%$   | 0.001   |
| [CoP] Exeter V40 Trilogy                                      | 997            | 0.86                   | 0.32                      | [-0.26 , 0.89] | Non-inferiority not shown | 0.278   |
| [CoP] Furlong HAC Stem CSF                                    | 3,217          | 1.83                   | 1.29                      | [ 0.79 , 1.79] | Inferior by $\geq 100\%$  | <0.001  |
| [CoP] Furlong HAC Stem Furlong HAC CSF Plus                   | 508            | 2.55                   | 2.01                      | [ 1.01 , 3.01] | Inferior by $\geq 100\%$  | <0.001  |
| [CoP] MS-30 Original ME Muller Low Profile Cup                | 796            | 0.64                   | 0.10                      | [-0.45 , 0.65] | Non-inferiority not shown | 0.725   |
| [CoP] SL-Plus Cementless Stem Bicon-Plus                      | 306            | 3.49                   | 2.95                      | [ 0.99 , 4.91] | Inferior by $\geq 100\%$  | 0.003   |
| [CoP] SL-Plus Cementless Stem EP-Fit Plus                     | 499            | 3.49                   | 2.95                      | [ 1.46 , 4.45] | Inferior by $\geq 100\%$  | <0.001  |
| [CoP] Taperloc Cementless Stem Exceed ABT                     | 466            | 1.23                   | 0.69                      | [ 0.07 , 1.31] | Non-inferiority not shown | 0.029   |

|                                                            |        |      |       |                |                           |        |
|------------------------------------------------------------|--------|------|-------|----------------|---------------------------|--------|
| [MoP] Accolade Trident                                     | 3,698  | 2.36 | 1.82  | [ 1.34 , 2.29] | Inferior by $\geq 100\%$  | <0.001 |
| [MoP] C-Stem AMT Cemented Stem Charnley and Elite Plus LPW | 954    | 1.29 | 0.75  | [ 0.13 , 1.37] | Inferior by $\geq 20\%$   | 0.017  |
| [MoP] C-Stem AMT Cemented Stem Elite Plus Cemented Cup     | 313    | 0.85 | 0.31  | [-0.57 , 1.18] | Non-inferiority not shown | 0.488  |
| [MoP] C-Stem AMT Cemented Stem Elite Plus Ogee             | 666    | 1.18 | 0.64  | [-0.02 , 1.30] | Non-inferiority not shown | 0.058  |
| [MoP] C-Stem AMT Cemented Stem Pinnacle                    | 426    | 1.66 | 1.12  | [ 0.40 , 1.83] | Inferior by $\geq 20\%$   | 0.002  |
| [MoP] C-Stem Cemented Stem Charnley Ogee                   | 480    | 2.25 | 1.71  | [ 0.50 , 2.92] | Inferior by $\geq 20\%$   | 0.006  |
| [MoP] C-Stem Cemented Stem Charnley and Elite Plus LPW     | 1,007  | 1.81 | 1.28  | [ 0.46 , 2.09] | Inferior by $\geq 20\%$   | 0.002  |
| [MoP] C-Stem Cemented Stem Duraloc Cementless Cup          | 388    | 2.33 | 1.79  | [ 0.34 , 3.24] | Inferior by $\geq 20\%$   | 0.016  |
| [MoP] C-Stem Cemented Stem Elite Plus Cemented Cup         | 357    | 0.47 | -0.07 | [-0.77 , 0.64] | Non-inferiority not shown | 0.848  |
| [MoP] C-Stem Cemented Stem Elite Plus Ogee                 | 1,554  | 1.02 | 0.49  | [-0.02 , 0.99] | Non-inferiority not shown | 0.062  |
| [MoP] C-Stem Cemented Stem Marathon                        | 473    | 0.91 | 0.37  | [-0.24 , 0.98] | Non-inferiority not shown | 0.235  |
| [MoP] C-Stem Cemented Stem Opera                           | 626    | 0.95 | 0.41  | [-0.30 , 1.13] | Non-inferiority not shown | 0.259  |
| [MoP] C-Stem Cemented Stem Wroblewski Golf Ball            | 488    | 1.61 | 1.07  | [ 0.04 , 2.11] | Non-inferiority not shown | 0.042  |
| [MoP] CCA Cemented Stem CCB Cup                            | 535    | 0.92 | 0.38  | [-0.32 , 1.08] | Non-inferiority not shown | 0.289  |
| [MoP] CLS Cementless Stem Allofit                          | 316    | 2.53 | 1.99  | [ 0.33 , 3.64] | Inferior by $\geq 20\%$   | 0.019  |
| [MoP] CMK Modular Cemented Stem CMK Cemented Cup           | 291    | 1.25 | 0.72  | [-0.54 , 1.97] | Non-inferiority not shown | 0.263  |
| [MoP] CPCS Opera                                           | 586    | 1.63 | 1.09  | [ 0.17 , 2.02] | Inferior by $\geq 20\%$   | 0.020  |
| [MoP] CPS Plus Opera                                       | 309    | 1.78 | 1.25  | [-0.20 , 2.69] | Non-inferiority not shown | 0.090  |
| [MoP] CPT Allofit                                          | 308    | 0.58 | 0.04  | [-0.69 , 0.77] | Non-inferiority not shown | 0.921  |
| [MoP] CPT Elite Plus Ogee                                  | 1,115  | 1.60 | 1.06  | [ 0.40 , 1.73] | Inferior by $\geq 20\%$   | 0.002  |
| [MoP] CPT Opera                                            | 252    | 1.84 | 1.30  | [-0.32 , 2.92] | Non-inferiority not shown | 0.116  |
| [MoP] CPT Original ME Muller Low Profile Cup               | 322    | 1.98 | 1.44  | [ 0.28 , 2.60] | Inferior by $\geq 20\%$   | 0.015  |
| [MoP] CPT Pinnacle                                         | 433    | 2.03 | 1.49  | [ 0.27 , 2.72] | Inferior by $\geq 20\%$   | 0.017  |
| [MoP] CPT Trabecular Metal Modular Cementless Cup          | 399    | 2.48 | 1.95  | [ 0.79 , 3.10] | Inferior by $\geq 100\%$  | 0.001  |
| [MoP] CPT Trilogy                                          | 3,903  | 2.10 | 1.56  | [ 1.11 , 2.01] | Inferior by $\geq 100\%$  | <0.001 |
| [MoP] CPT ZCA                                              | 3,998  | 1.98 | 1.44  | [ 1.00 , 1.88] | Inferior by $\geq 100\%$  | <0.001 |
| [MoP] Charnley Cemented Stem Charnley Cemented Cup         | 2,265  | 1.42 | 0.88  | [ 0.35 , 1.41] | Inferior by $\geq 20\%$   | 0.001  |
| [MoP] Charnley Cemented Stem Charnley Ogee                 | 4,710  | 1.63 | 1.10  | [ 0.67 , 1.53] | Inferior by $\geq 100\%$  | <0.001 |
| [MoP] Charnley Cemented Stem Charnley and Elite Plus LPW   | 3,628  | 1.00 | 0.46  | [ 0.05 , 0.86] | Non-inferiority not shown | 0.027  |
| [MoP] Charnley Cemented Stem Opera                         | 697    | 1.35 | 0.81  | [-0.03 , 1.65] | Non-inferiority not shown | 0.058  |
| [MoP] Charnley Cemented Stem Wroblewski Golf Ball          | 487    | 1.73 | 1.19  | [ 0.14 , 2.24] | Inferior by $\geq 20\%$   | 0.027  |
| [MoP] Corail Charnley and Elite Plus LPW                   | 332    | 1.29 | 0.75  | [-0.21 , 1.71] | Non-inferiority not shown | 0.126  |
| [MoP] Corail Duraloc Cementless Cup                        | 2,023  | 2.10 | 1.56  | [ 0.90 , 2.22] | Inferior by $\geq 100\%$  | <0.001 |
| [MoP] Corail Elite Plus Cemented Cup                       | 481    | 0.99 | 0.45  | [-0.39 , 1.29] | Non-inferiority not shown | 0.295  |
| [MoP] Corail Elite Plus Ogee                               | 678    | 1.65 | 1.11  | [ 0.30 , 1.93] | Inferior by $\geq 20\%$   | 0.007  |
| [MoP] Corail Marathon                                      | 921    | 0.93 | 0.40  | [-0.06 , 0.85] | Non-inferiority not shown | 0.089  |
| [MoP] Corail Pinnacle                                      | 10,090 | 1.56 | 1.03  | [ 0.71 , 1.35] | Inferior by $\geq 100\%$  | <0.001 |
| [MoP] Corail Trilogy                                       | 859    | 1.22 | 0.69  | [-0.01 , 1.38] | Non-inferiority not shown | 0.054  |
| [MoP] Elite Plus Cemented Stem Elite Plus Ogee             | 362    | 1.26 | 0.72  | [-0.41 , 1.86] | Non-inferiority not shown | 0.211  |
| [MoP] Exeter V40 ABG II Cementless Cup                     | 458    | 1.01 | 0.47  | [-0.45 , 1.40] | Non-inferiority not shown | 0.315  |
| [MoP] Exeter V40 Cenator Cemented Cup                      | 1,153  | 2.12 | 1.58  | [ 0.80 , 2.36] | Inferior by $\geq 100\%$  | <0.001 |
| [MoP] Exeter V40 Charnley Ogee                             | 900    | 1.39 | 0.85  | [ 0.12 , 1.59] | Inferior by $\geq 20\%$   | 0.023  |
| [MoP] Exeter V40 Charnley and Elite Plus LPW               | 1,309  | 1.61 | 1.07  | [ 0.46 , 1.68] | Inferior by $\geq 20\%$   | 0.001  |
| [MoP] Exeter V40 Duraloc Cementless Cup                    | 671    | 1.82 | 1.28  | [ 0.26 , 2.30] | Inferior by $\geq 20\%$   | 0.014  |
| [MoP] Exeter V40 EP-Fit Plus                               | 312    | 2.98 | 2.44  | [ 0.60 , 4.29] | Inferior by $\geq 100\%$  | 0.009  |
| [MoP] Exeter V40 Elite Plus Ogee                           | 8,315  | 1.02 | 0.48  | [ 0.15 , 0.81] | Inferior by $\geq 20\%$   | 0.004  |



|                                                               |        |      |      |                |                           |        |
|---------------------------------------------------------------|--------|------|------|----------------|---------------------------|--------|
| [MoP] Exeter V40 Exceed                                       | 250    | 0.85 | 0.31 | [-0.68 , 1.30] | Non-inferiority not shown | 0.541  |
| [MoP] Exeter V40 Exeter Contemporary Flanged                  | 17,934 | 1.04 | 0.50 | [ 0.20 , 0.80] | Inferior by $\geq 20\%$   | 0.001  |
| [MoP] Exeter V40 Exeter Contemporary Hooded                   | 7,664  | 2.02 | 1.48 | [ 1.10 , 1.85] | Inferior by $\geq 100\%$  | <0.001 |
| [MoP] Exeter V40 Exeter Duration                              | 7,168  | 1.43 | 0.89 | [ 0.53 , 1.25] | Inferior by $\geq 20\%$   | <0.001 |
| [MoP] Exeter V40 Exeter X3 Rimfit                             | 550    | 0.92 | 0.38 | [-0.02 , 0.79] | Non-inferiority not shown | 0.066  |
| [MoP] Exeter V40 Marathon                                     | 364    | 1.25 | 0.71 | [-0.04 , 1.46] | Non-inferiority not shown | 0.064  |
| [MoP] Exeter V40 Opera                                        | 1,221  | 0.98 | 0.44 | [-0.10 , 0.98] | Non-inferiority not shown | 0.110  |
| [MoP] Exeter V40 Pinnacle                                     | 1,075  | 1.24 | 0.70 | [ 0.17 , 1.24] | Inferior by $\geq 20\%$   | 0.010  |
| [MoP] Exeter V40 Reflection Cementless                        | 1,164  | 1.05 | 0.51 | [-0.10 , 1.13] | Non-inferiority not shown | 0.100  |
| [MoP] Exeter V40 Trident                                      | 6,743  | 1.30 | 0.76 | [ 0.43 , 1.09] | Inferior by $\geq 20\%$   | <0.001 |
| [MoP] Exeter V40 Trilogy                                      | 4,060  | 1.24 | 0.70 | [ 0.30 , 1.10] | Inferior by $\geq 20\%$   | 0.001  |
| [MoP] Exeter V40 Ultima Cemented Cup                          | 720    | 1.90 | 1.36 | [ 0.37 , 2.35] | Inferior by $\geq 20\%$   | 0.007  |
| [MoP] Furlong Cemented Stem JRI Cemented Cup                  | 892    | 1.74 | 1.20 | [ 0.38 , 2.03] | Inferior by $\geq 20\%$   | 0.004  |
| [MoP] Furlong HAC Stem CSF                                    | 3,340  | 2.50 | 1.96 | [ 1.43 , 2.50] | Inferior by $\geq 100\%$  | <0.001 |
| [MoP] Furlong HAC Stem Furlong HAC CSF Plus                   | 1,122  | 2.75 | 2.21 | [ 1.48 , 2.94] | Inferior by $\geq 100\%$  | <0.001 |
| [MoP] Furlong HAC Stem Furlong Threaded                       | 269    | 2.84 | 2.30 | [ 0.45 , 4.15] | Inferior by $\geq 20\%$   | 0.015  |
| [MoP] MS-30 Original ME Muller Low Profile Cup                | 366    | 0.98 | 0.44 | [-0.48 , 1.36] | Non-inferiority not shown | 0.351  |
| [MoP] Muller Straight Stem Centerpulse Muller                 | 291    | 1.85 | 1.31 | [-0.18 , 2.81] | Non-inferiority not shown | 0.085  |
| [MoP] Muller Straight Stem Original ME Muller Low Profile Cup | 718    | 1.26 | 0.72 | [ 0.02 , 1.42] | Non-inferiority not shown | 0.044  |
| [MoP] Muller-Biomet Apollo                                    | 972    | 1.50 | 0.97 | [ 0.24 , 1.69] | Inferior by $\geq 20\%$   | 0.009  |
| [MoP] Muller-Biomet Original ME Muller Low Profile Cup        | 442    | 1.79 | 1.25 | [ 0.25 , 2.26] | Inferior by $\geq 20\%$   | 0.015  |
| [MoP] Omnifit Cemented Stem ODC                               | 559    | 2.23 | 1.69 | [ 0.50 , 2.87] | Inferior by $\geq 20\%$   | 0.005  |
| [MoP] SL-Plus Cementless Stem EP-Fit Plus                     | 980    | 3.12 | 2.58 | [ 1.62 , 3.54] | Inferior by $\geq 100\%$  | <0.001 |
| [MoP] SP II Cemented Stem Interplanta                         | 392    | 2.33 | 1.79 | [ 0.40 , 3.18] | Inferior by $\geq 20\%$   | 0.012  |
| [MoP] Stanmore Modular Stem Elite Plus Cemented Cup           | 273    | 1.19 | 0.65 | [-0.55 , 1.85] | Non-inferiority not shown | 0.287  |
| [MoP] Stanmore Modular Stem SHP Cup                           | 483    | 0.75 | 0.21 | [-0.45 , 0.87] | Non-inferiority not shown | 0.534  |
| [MoP] Stanmore Modular Stem Stanmore-Arcom Cup                | 2,115  | 1.69 | 1.15 | [ 0.60 , 1.70] | Inferior by $\geq 100\%$  | <0.001 |
| [MoP] Synergy Cementless Stem Reflection Cementless           | 825    | 0.91 | 0.38 | [-0.31 , 1.06] | Non-inferiority not shown | 0.284  |
| [MoP] Taperloc Cementless Stem Exceed                         | 277    | 1.84 | 1.30 | [-0.18 , 2.79] | Non-inferiority not shown | 0.086  |
| [MoP] Taperloc Cementless Stem Exceed ABT                     | 1,136  | 2.32 | 1.78 | [ 1.17 , 2.38] | Inferior by $\geq 100\%$  | <0.001 |
| [MoP] Versys Cementless Stem Trilogy                          | 462    | 4.99 | 4.45 | [ 2.56 , 6.34] | Inferior by $\geq 100\%$  | <0.001 |

**Supplemental table 2c: Difference in Kaplan-Meier failure estimate between a contemporary reference and implants with at least 250 at risk at 7 years since primary in females**

| Stem/cup brand                                                | Number at risk | Cumulative failure (%) | Difference in failure (%) | 95% CI         | Equivalence status        | p-value |
|---------------------------------------------------------------|----------------|------------------------|---------------------------|----------------|---------------------------|---------|
| [MoP] Exeter V40 Elite Plus Cemented Cup                      | 1,165          | 0.76                   | [REFERENCE]               |                |                           |         |
| [CoC] ABG II Monolithic Cementless Stem ABG II Cementless Cup | 441            | 2.60                   | 1.84                      | [ 0.40 , 3.29] | Inferior by $\geq 20\%$   | 0.012   |
| [CoC] ABG II Monolithic Cementless Stem Trident               | 341            | 3.21                   | 2.45                      | [ 0.80 , 4.10] | Inferior by $\geq 100\%$  | 0.004   |
| [CoC] Accolade Trident                                        | 1,744          | 3.15                   | 2.39                      | [ 1.69 , 3.09] | Inferior by $\geq 100\%$  | <0.001  |
| [CoC] Corail Duraloc Option                                   | 466            | 3.09                   | 2.33                      | [ 0.88 , 3.79] | Inferior by $\geq 100\%$  | 0.002   |
| [CoC] Corail Pinnacle                                         | 4,397          | 2.64                   | 1.88                      | [ 1.42 , 2.34] | Inferior by $\geq 100\%$  | <0.001  |
| [CoC] Exeter V40 ABG II Cementless Cup                        | 615            | 1.55                   | 0.79                      | [-0.13 , 1.71] | Non-inferiority not shown | 0.094   |
| [CoC] Exeter V40 Trident                                      | 3,449          | 1.85                   | 1.09                      | [ 0.58 , 1.61] | Inferior by $\geq 20\%$   | <0.001  |
| [CoC] Furlong HAC Stem CSF                                    | 776            | 3.08                   | 2.32                      | [ 1.12 , 3.53] | Inferior by $\geq 100\%$  | <0.001  |
| [CoC] Furlong HAC Stem Furlong HAC CSF Plus                   | 1,170          | 2.19                   | 1.43                      | [ 0.87 , 2.00] | Inferior by $\geq 100\%$  | <0.001  |
| [CoC] SL-Plus Cementless Stem EP-Fit Plus                     | 486            | 3.61                   | 2.85                      | [ 1.32 , 4.38] | Inferior by $\geq 100\%$  | <0.001  |
| [CoC] Taperloc Cementless Stem Exceed ABT                     | 981            | 1.93                   | 1.17                      | [ 0.60 , 1.74] | Inferior by $\geq 20\%$   | <0.001  |
| [CoP] Accolade Trident                                        | 345            | 1.98                   | 1.22                      | [ 0.48 , 1.96] | Inferior by $\geq 20\%$   | 0.001   |
| [CoP] C-Stem Cemented Stem Opera                              | 274            | 1.84                   | 1.08                      | [-0.34 , 2.49] | Non-inferiority not shown | 0.135   |
| [CoP] C-Stem Cemented Stem Wroblewski Golf Ball               | 347            | 1.80                   | 1.05                      | [-0.27 , 2.37] | Non-inferiority not shown | 0.120   |
| [CoP] Corail Pinnacle                                         | 1,028          | 2.07                   | 1.32                      | [ 0.74 , 1.89] | Inferior by $\geq 20\%$   | <0.001  |
| [CoP] Corail Trilogy                                          | 310            | 1.10                   | 0.34                      | [-0.69 , 1.37] | Non-inferiority not shown | 0.513   |
| [CoP] Exeter V40 Elite Plus Ogee                              | 304            | 1.29                   | 0.54                      | [-0.41 , 1.49] | Non-inferiority not shown | 0.268   |
| [CoP] Exeter V40 Exeter Contemporary Flanged                  | 694            | 1.78                   | 1.02                      | [ 0.32 , 1.73] | Inferior by $\geq 20\%$   | 0.004   |
| [CoP] Exeter V40 Exeter Duration                              | 309            | 2.02                   | 1.26                      | [-0.12 , 2.65] | Non-inferiority not shown | 0.074   |
| [CoP] Exeter V40 Trident                                      | 656            | 1.46                   | 0.71                      | [ 0.13 , 1.28] | Non-inferiority not shown | 0.017   |
| [CoP] Exeter V40 Trilogy                                      | 723            | 1.19                   | 0.43                      | [-0.30 , 1.16] | Non-inferiority not shown | 0.249   |
| [CoP] Furlong HAC Stem CSF                                    | 2,638          | 2.37                   | 1.61                      | [ 0.99 , 2.22] | Inferior by $\geq 100\%$  | <0.001  |
| [CoP] MS-30 Original ME Muller Low Profile Cup                | 489            | 0.64                   | -0.12                     | [-0.72 , 0.48] | Non-inferiority not shown | 0.696   |
| [CoP] SL-Plus Cementless Stem EP-Fit Plus                     | 364            | 4.38                   | 3.63                      | [ 1.89 , 5.37] | Inferior by $\geq 100\%$  | <0.001  |
| [MoP] Accolade Trident                                        | 1,704          | 3.00                   | 2.25                      | [ 1.63 , 2.86] | Inferior by $\geq 100\%$  | <0.001  |
| [MoP] C-Stem AMT Cemented Stem Charnley and Elite Plus LPW    | 534            | 1.65                   | 0.89                      | [ 0.06 , 1.71] | Non-inferiority not shown | 0.035   |
| [MoP] C-Stem AMT Cemented Stem Elite Plus Ogee                | 378            | 1.98                   | 1.22                      | [ 0.17 , 2.28] | Inferior by $\geq 20\%$   | 0.023   |
| [MoP] C-Stem Cemented Stem Charnley Ogee                      | 384            | 2.49                   | 1.73                      | [ 0.41 , 3.05] | Inferior by $\geq 20\%$   | 0.010   |
| [MoP] C-Stem Cemented Stem Charnley and Elite Plus LPW        | 915            | 2.34                   | 1.58                      | [ 0.61 , 2.54] | Inferior by $\geq 20\%$   | 0.001   |
| [MoP] C-Stem Cemented Stem Duraloc Cementless Cup             | 300            | 3.44                   | 2.68                      | [ 0.86 , 4.49] | Inferior by $\geq 100\%$  | 0.004   |
| [MoP] C-Stem Cemented Stem Elite Plus Cemented Cup            | 295            | 1.05                   | 0.30                      | [-0.80 , 1.39] | Non-inferiority not shown | 0.598   |
| [MoP] C-Stem Cemented Stem Elite Plus Ogee                    | 1,198          | 1.54                   | 0.79                      | [ 0.10 , 1.47] | Non-inferiority not shown | 0.024   |
| [MoP] C-Stem Cemented Stem Opera                              | 463            | 1.66                   | 0.90                      | [-0.12 , 1.93] | Non-inferiority not shown | 0.084   |
| [MoP] C-Stem Cemented Stem Wroblewski Golf Ball               | 333            | 2.18                   | 1.42                      | [ 0.10 , 2.73] | Non-inferiority not shown | 0.034   |
| [MoP] CPS Plus Opera                                          | 279            | 2.13                   | 1.37                      | [-0.24 , 2.97] | Non-inferiority not shown | 0.095   |
| [MoP] CPT Elite Plus Ogee                                     | 741            | 2.31                   | 1.55                      | [ 0.65 , 2.45] | Inferior by $\geq 20\%$   | 0.001   |
| [MoP] CPT Trilogy                                             | 2,474          | 2.68                   | 1.92                      | [ 1.34 , 2.50] | Inferior by $\geq 100\%$  | <0.001  |
| [MoP] CPT ZCA                                                 | 2,612          | 2.46                   | 1.70                      | [ 1.15 , 2.26] | Inferior by $\geq 100\%$  | <0.001  |
| [MoP] Charnley Cemented Stem Charnley Cemented Cup            | 1,879          | 1.93                   | 1.18                      | [ 0.52 , 1.83] | Inferior by $\geq 20\%$   | <0.001  |

|                                                               |        |      |      |                |                           |        |
|---------------------------------------------------------------|--------|------|------|----------------|---------------------------|--------|
| [MoP] Charnley Cemented Stem Charnley Ogee                    | 3,746  | 1.93 | 1.18 | [ 0.65 , 1.70] | Inferior by $\geq 20\%$   | <0.001 |
| [MoP] Charnley Cemented Stem Charnley and Elite Plus LPW      | 2,920  | 1.35 | 0.59 | [ 0.08 , 1.11] | Non-inferiority not shown | 0.024  |
| [MoP] Charnley Cemented Stem Opera                            | 496    | 2.12 | 1.37 | [ 0.26 , 2.47] | Inferior by $\geq 20\%$   | 0.015  |
| [MoP] Charnley Cemented Stem Wroblewski Golf Ball             | 404    | 1.73 | 0.97 | [-0.11 , 2.05] | Non-inferiority not shown | 0.079  |
| [MoP] Corail Duraloc Cementless Cup                           | 1,695  | 3.25 | 2.49 | [ 1.65 , 3.34] | Inferior by $\geq 100\%$  | <0.001 |
| [MoP] Corail Elite Plus Cemented Cup                          | 322    | 1.46 | 0.70 | [-0.39 , 1.79] | Non-inferiority not shown | 0.208  |
| [MoP] Corail Elite Plus Ogee                                  | 456    | 1.85 | 1.09 | [ 0.16 , 2.03] | Inferior by $\geq 20\%$   | 0.022  |
| [MoP] Corail Pinnacle                                         | 4,975  | 2.01 | 1.25 | [ 0.82 , 1.68] | Inferior by $\geq 100\%$  | <0.001 |
| [MoP] Corail Trilogy                                          | 533    | 1.87 | 1.11 | [ 0.14 , 2.08] | Non-inferiority not shown | 0.025  |
| [MoP] Elite Plus Cemented Stem Elite Plus Ogee                | 329    | 1.26 | 0.50 | [-0.66 , 1.67] | Non-inferiority not shown | 0.394  |
| [MoP] Exeter V40 ABG II Cementless Cup                        | 416    | 1.25 | 0.49 | [-0.57 , 1.55] | Non-inferiority not shown | 0.365  |
| [MoP] Exeter V40 Cenator Cemented Cup                         | 860    | 2.22 | 1.46 | [ 0.62 , 2.30] | Inferior by $\geq 20\%$   | 0.001  |
| [MoP] Exeter V40 Charnley Ogee                                | 721    | 1.39 | 0.64 | [-0.14 , 1.41] | Non-inferiority not shown | 0.108  |
| [MoP] Exeter V40 Charnley and Elite Plus LPW                  | 788    | 1.99 | 1.23 | [ 0.48 , 1.99] | Inferior by $\geq 20\%$   | 0.001  |
| [MoP] Exeter V40 Duraloc Cementless Cup                       | 507    | 2.12 | 1.37 | [ 0.24 , 2.49] | Inferior by $\geq 20\%$   | 0.017  |
| [MoP] Exeter V40 EP-Fit Plus                                  | 268    | 3.64 | 2.88 | [ 0.82 , 4.94] | Inferior by $\geq 100\%$  | 0.006  |
| [MoP] Exeter V40 Elite Plus Ogee                              | 5,848  | 1.40 | 0.65 | [ 0.21 , 1.08] | Inferior by $\geq 20\%$   | 0.004  |
| [MoP] Exeter V40 Exeter Contemporary Flanged                  | 11,143 | 1.36 | 0.60 | [ 0.20 , 1.00] | Inferior by $\geq 20\%$   | 0.003  |
| [MoP] Exeter V40 Exeter Contemporary Hooded                   | 4,810  | 2.77 | 2.01 | [ 1.52 , 2.51] | Inferior by $\geq 100\%$  | <0.001 |
| [MoP] Exeter V40 Exeter Duration                              | 5,153  | 2.05 | 1.29 | [ 0.81 , 1.77] | Inferior by $\geq 100\%$  | <0.001 |
| [MoP] Exeter V40 Opera                                        | 805    | 1.35 | 0.59 | [-0.10 , 1.29] | Non-inferiority not shown | 0.095  |
| [MoP] Exeter V40 Pinnacle                                     | 507    | 1.45 | 0.69 | [ 0.04 , 1.35] | Non-inferiority not shown | 0.038  |
| [MoP] Exeter V40 Reflection Cementless                        | 877    | 1.73 | 0.97 | [ 0.14 , 1.80] | Non-inferiority not shown | 0.022  |
| [MoP] Exeter V40 Trident                                      | 3,625  | 1.74 | 0.99 | [ 0.53 , 1.44] | Inferior by $\geq 20\%$   | <0.001 |
| [MoP] Exeter V40 Trilogy                                      | 2,694  | 1.53 | 0.77 | [ 0.27 , 1.28] | Inferior by $\geq 20\%$   | 0.003  |
| [MoP] Exeter V40 Ultima Cemented Cup                          | 635    | 2.04 | 1.28 | [ 0.22 , 2.33] | Inferior by $\geq 20\%$   | 0.018  |
| [MoP] Furlong Cemented Stem JRI Cemented Cup                  | 730    | 2.09 | 1.33 | [ 0.39 , 2.28] | Inferior by $\geq 20\%$   | 0.006  |
| [MoP] Furlong HAC Stem CSF                                    | 2,586  | 3.04 | 2.28 | [ 1.64 , 2.92] | Inferior by $\geq 100\%$  | <0.001 |
| [MoP] Furlong HAC Stem Furlong HAC CSF Plus                   | 469    | 3.16 | 2.40 | [ 1.53 , 3.27] | Inferior by $\geq 100\%$  | <0.001 |
| [MoP] Muller Straight Stem Original ME Muller Low Profile Cup | 474    | 2.09 | 1.33 | [ 0.29 , 2.37] | Inferior by $\geq 20\%$   | 0.012  |
| [MoP] Muller-Biomet Apollo                                    | 714    | 1.85 | 1.09 | [ 0.23 , 1.95] | Inferior by $\geq 20\%$   | 0.013  |
| [MoP] Omnifit Cemented Stem ODC                               | 495    | 3.36 | 2.60 | [ 1.10 , 4.10] | Inferior by $\geq 100\%$  | 0.001  |
| [MoP] SL-Plus Cementless Stem EP-Fit Plus                     | 750    | 3.80 | 3.04 | [ 1.92 , 4.16] | Inferior by $\geq 100\%$  | <0.001 |
| [MoP] SP II Cemented Stem Interplanta                         | 326    | 2.88 | 2.12 | [ 0.52 , 3.72] | Inferior by $\geq 20\%$   | 0.009  |
| [MoP] Stanmore Modular Stem SHP Cup                           | 352    | 1.24 | 0.48 | [-0.50 , 1.46] | Non-inferiority not shown | 0.338  |
| [MoP] Stanmore Modular Stem Stanmore-Arcom Cup                | 1,379  | 2.01 | 1.25 | [ 0.59 , 1.90] | Inferior by $\geq 20\%$   | <0.001 |
| [MoP] Synergy Cementless Stem Reflection Cementless           | 607    | 1.33 | 0.57 | [-0.30 , 1.44] | Non-inferiority not shown | 0.196  |
| [MoP] Taperloc Cementless Stem Exceed ABT                     | 346    | 2.99 | 2.24 | [ 1.34 , 3.13] | Inferior by $\geq 100\%$  | <0.001 |
| [MoP] Versys Cementless Stem Trilogy                          | 418    | 4.99 | 4.23 | [ 2.32 , 6.14] | Inferior by $\geq 100\%$  | <0.001 |

**Supplemental table 2d: Difference in Kaplan-Meier failure estimate between a contemporary reference and implants with at least 250 at risk at 10 years since primary in females**

| Stem/cup brand                                                | Number at risk | Cumulative failure (%) | Difference in failure (%) | 95% CI          | Equivalence status        | p-value |
|---------------------------------------------------------------|----------------|------------------------|---------------------------|-----------------|---------------------------|---------|
| [MoP] Exeter V40 Elite Plus Ogee                              | 2,475          | 1.95                   | [REFERENCE]               |                 |                           |         |
| [CoC] ABG II Monolithic Cementless Stem ABG II Cementless Cup | 347            | 3.34                   | 1.38                      | [-0.27 , 3.03]  | Non-inferiority not shown | 0.100   |
| [CoC] Accolade Trident                                        | 255            | 4.07                   | 2.11                      | [ 1.17 , 3.05]  | Inferior by $\geq 20\%$   | <0.001  |
| [CoC] Corail Pinnacle                                         | 523            | 3.61                   | 1.65                      | [ 1.01 , 2.30]  | Inferior by $\geq 20\%$   | <0.001  |
| [CoC] Exeter V40 ABG II Cementless Cup                        | 302            | 2.63                   | 0.67                      | [-0.64 , 1.98]  | Non-inferiority not shown | 0.317   |
| [CoC] Exeter V40 Trident                                      | 1,079          | 2.45                   | 0.50                      | [-0.11 , 1.11]  | Non-inferiority not shown | 0.106   |
| [CoC] Furlong HAC Stem CSF                                    | 470            | 4.44                   | 2.49                      | [ 1.01 , 3.97]  | Inferior by $\geq 20\%$   | 0.001   |
| [CoP] Exeter V40 Trilogy                                      | 300            | 1.58                   | -0.37                     | [-1.28 , 0.53]  | Non-inferiority not shown | 0.417   |
| [CoP] Furlong HAC Stem CSF                                    | 1,467          | 3.08                   | 1.12                      | [ 0.42 , 1.82]  | Inferior by $\geq 20\%$   | 0.002   |
| [MoP] C-Stem Cemented Stem Charnley and Elite Plus LPW        | 534            | 2.79                   | 0.84                      | [-0.21 , 1.88]  | Non-inferiority not shown | 0.117   |
| [MoP] C-Stem Cemented Stem Elite Plus Ogee                    | 570            | 2.48                   | 0.53                      | [-0.41 , 1.46]  | Non-inferiority not shown | 0.271   |
| [MoP] CPT Elite Plus Ogee                                     | 256            | 2.80                   | 0.85                      | [-0.31 , 2.01]  | Non-inferiority not shown | 0.151   |
| [MoP] CPT Trilogy                                             | 754            | 4.11                   | 2.16                      | [ 1.31 , 3.01]  | Inferior by $\geq 20\%$   | <0.001  |
| [MoP] CPT ZCA                                                 | 903            | 3.43                   | 1.48                      | [ 0.76 , 2.19]  | Inferior by $\geq 20\%$   | <0.001  |
| [MoP] Charnley Cemented Stem Charnley Cemented Cup            | 1,136          | 2.83                   | 0.88                      | [ 0.10 , 1.66]  | Non-inferiority not shown | 0.027   |
| [MoP] Charnley Cemented Stem Charnley Ogee                    | 1,951          | 3.23                   | 1.28                      | [ 0.63 , 1.92]  | Inferior by $\geq 20\%$   | <0.001  |
| [MoP] Charnley Cemented Stem Charnley and Elite Plus LPW      | 1,623          | 2.23                   | 0.28                      | [-0.34 , 0.90]  | Non-inferiority not shown | 0.376   |
| [MoP] Charnley Cemented Stem Wroblewski Golf Ball             | 252            | 2.62                   | 0.67                      | [-0.81 , 2.14]  | Non-inferiority not shown | 0.375   |
| [MoP] Corail Duraloc Cementless Cup                           | 783            | 4.61                   | 2.66                      | [ 1.62 , 3.70]  | Inferior by $\geq 20\%$   | <0.001  |
| [MoP] Corail Pinnacle                                         | 1,043          | 2.78                   | 0.83                      | [ 0.28 , 1.38]  | Non-inferiority not shown | 0.003   |
| [MoP] Exeter V40 ABG II Cementless Cup                        | 279            | 1.55                   | -0.40                     | [-1.60 , 0.80]  | Non-inferiority not shown | 0.515   |
| [MoP] Exeter V40 Cenator Cemented Cup                         | 468            | 2.50                   | 0.55                      | [-0.36 , 1.45]  | Non-inferiority not shown | 0.239   |
| [MoP] Exeter V40 Charnley Ogee                                | 434            | 1.39                   | -0.56                     | [-1.32 , 0.20]  | Non-inferior              | 0.146   |
| [MoP] Exeter V40 Charnley and Elite Plus LPW                  | 292            | 2.60                   | 0.65                      | [-0.30 , 1.60]  | Non-inferiority not shown | 0.180   |
| [MoP] Exeter V40 Duraloc Cementless Cup                       | 301            | 3.88                   | 1.92                      | [ 0.23 , 3.62]  | Non-inferiority not shown | 0.026   |
| [MoP] Exeter V40 Elite Plus Cemented Cup                      | 480            | 1.04                   | -0.91                     | [-1.55 , -0.28] | Non-inferior              | 0.005   |
| [MoP] Exeter V40 Exeter Contemporary Flanged                  | 3,136          | 1.98                   | 0.02                      | [-0.39 , 0.43]  | Non-inferiority not shown | 0.919   |
| [MoP] Exeter V40 Exeter Contemporary Hooded                   | 1,595          | 4.09                   | 2.14                      | [ 1.52 , 2.75]  | Inferior by $\geq 20\%$   | <0.001  |
| [MoP] Exeter V40 Exeter Duration                              | 2,079          | 3.16                   | 1.21                      | [ 0.64 , 1.78]  | Inferior by $\geq 20\%$   | <0.001  |
| [MoP] Exeter V40 Opera                                        | 315            | 2.79                   | 0.83                      | [-0.44 , 2.11]  | Non-inferiority not shown | 0.200   |
| [MoP] Exeter V40 Trident                                      | 714            | 2.63                   | 0.68                      | [ 0.06 , 1.29]  | Non-inferiority not shown | 0.031   |
| [MoP] Exeter V40 Trilogy                                      | 955            | 2.15                   | 0.20                      | [-0.40 , 0.80]  | Non-inferiority not shown | 0.518   |
| [MoP] Exeter V40 Ultima Cemented Cup                          | 334            | 2.65                   | 0.70                      | [-0.55 , 1.94]  | Non-inferiority not shown | 0.275   |
| [MoP] Furlong Cemented Stem JRI Cemented Cup                  | 413            | 3.49                   | 1.53                      | [ 0.20 , 2.87]  | Non-inferiority not shown | 0.024   |
| [MoP] Furlong HAC Stem CSF                                    | 1,088          | 4.21                   | 2.25                      | [ 1.46 , 3.04]  | Inferior by $\geq 20\%$   | <0.001  |
| [MoP] Muller-Biomet Apollo                                    | 256            | 2.18                   | 0.23                      | [-0.84 , 1.30]  | Non-inferiority not shown | 0.673   |
| [MoP] Omnifit Cemented Stem ODC                               | 321            | 4.49                   | 2.54                      | [ 0.76 , 4.32]  | Inferior by $\geq 20\%$   | 0.005   |
| [MoP] Stanmore Modular Stem Stanmore-Arcom Cup                | 489            | 2.78                   | 0.83                      | [-0.01 , 1.66]  | Non-inferiority not shown | 0.052   |
| [MoP] Versys Cementless Stem Trilogy                          | 263            | 5.52                   | 3.57                      | [ 1.54 , 5.60]  | Inferior by $\geq 20\%$   | 0.001   |



**Supplemental table 3a: Difference in Kaplan-Meier failure estimate between a contemporary reference and implants with at least 250 at risk at 3 years since primary in females <55 years**

| Stem/cup brand                               | Number at risk | Cumulative failure (%) | Difference in failure (%) | 95% CI         | Equivalence status        | p-value |
|----------------------------------------------|----------------|------------------------|---------------------------|----------------|---------------------------|---------|
| [CoC] Exeter V40 Trident                     | 1,785          | 0.79                   | [REFERENCE]               |                |                           |         |
| [CoC] Accolade Trident                       | 865            | 2.12                   | 1.33                      | [ 0.33 , 2.33] | Inferior by $\geq 20\%$   | 0.009   |
| [CoC] Corail DeltaMotion                     | 342            | 1.53                   | 0.74                      | [-0.54 , 2.02] | Non-inferiority not shown | 0.256   |
| [CoC] Corail Pinnacle                        | 4,110          | 2.15                   | 1.36                      | [ 0.81 , 1.92] | Inferior by $\geq 100\%$  | <0.001  |
| [CoC] Furlong HAC Stem Furlong HAC CSF Plus  | 969            | 1.57                   | 0.78                      | [-0.01 , 1.57] | Non-inferiority not shown | 0.052   |
| [CoC] M/L Taper Cementless Continuum         | 324            | 1.22                   | 0.43                      | [-0.70 , 1.57] | Non-inferiority not shown | 0.456   |
| [CoC] Taperloc Cementless Stem Exceed ABT    | 964            | 1.23                   | 0.44                      | [-0.27 , 1.16] | Non-inferiority not shown | 0.225   |
| [CoP] Accolade Trident                       | 313            | 1.01                   | 0.22                      | [-0.67 , 1.12] | Non-inferiority not shown | 0.629   |
| [CoP] C-Stem Cemented Stem Marathon          | 251            | 1.23                   | 0.44                      | [-0.71 , 1.58] | Non-inferiority not shown | 0.457   |
| [CoP] Corail Pinnacle                        | 720            | 1.95                   | 1.16                      | [ 0.31 , 2.00] | Inferior by $\geq 20\%$   | 0.007   |
| [CoP] Exeter V40 Exeter X3 Rimfit            | 309            | 1.29                   | 0.50                      | [-0.55 , 1.56] | Non-inferiority not shown | 0.351   |
| [CoP] Exeter V40 Trident                     | 493            | 1.06                   | 0.27                      | [-0.51 , 1.05] | Non-inferiority not shown | 0.501   |
| [CoP] Furlong HAC Stem CSF                   | 259            | 1.81                   | 1.02                      | [-0.60 , 2.64] | Non-inferiority not shown | 0.217   |
| [MoP] Accolade Trident                       | 256            | 1.87                   | 1.08                      | [-0.45 , 2.61] | Non-inferiority not shown | 0.168   |
| [MoP] Corail Pinnacle                        | 594            | 1.73                   | 0.94                      | [-0.05 , 1.93] | Non-inferiority not shown | 0.062   |
| [MoP] Exeter V40 Exeter Contemporary Flanged | 366            | 0.56                   | -0.23                     | [-0.97 , 0.50] | Non-inferiority not shown | 0.535   |
| [MoP] Exeter V40 Trident                     | 344            | 1.05                   | 0.26                      | [-0.74 , 1.27] | Non-inferiority not shown | 0.610   |

**Supplemental table 3b: Difference in Kaplan-Meier failure estimate between a contemporary reference and implants with at least 250 at risk at 5 years since primary in females <55 years**

| Stem/cup brand                               | Number at risk | Cumulative failure (%) | Difference in failure (%) | 95% CI         | Equivalence status        | p-value |
|----------------------------------------------|----------------|------------------------|---------------------------|----------------|---------------------------|---------|
| [CoC] Exeter V40 Trident                     | 1,426          | 1.17                   | [REFERENCE]               |                |                           |         |
| [CoC] Accolade Trident                       | 669            | 2.64                   | 1.47                      | [ 0.31 , 2.62] | Inferior by $\geq 20\%$   | 0.013   |
| [CoC] Corail Pinnacle                        | 2,754          | 2.93                   | 1.76                      | [ 1.07 , 2.45] | Inferior by $\geq 20\%$   | <0.001  |
| [CoC] Furlong HAC Stem Furlong HAC CSF Plus  | 610            | 1.82                   | 0.65                      | [-0.26 , 1.57] | Non-inferiority not shown | 0.161   |
| [CoC] Taperloc Cementless Stem Exceed ABT    | 557            | 2.05                   | 0.88                      | [-0.11 , 1.86] | Non-inferiority not shown | 0.080   |
| [CoP] Corail Pinnacle                        | 369            | 2.59                   | 1.42                      | [ 0.33 , 2.52] | Inferior by $\geq 20\%$   | 0.011   |
| [MoP] Corail Pinnacle                        | 365            | 2.65                   | 1.48                      | [ 0.18 , 2.78] | Non-inferiority not shown | 0.026   |
| [MoP] Exeter V40 Exeter Contemporary Flanged | 279            | 1.81                   | 0.64                      | [-0.82 , 2.10] | Non-inferiority not shown | 0.391   |

**Supplemental table 3c: Difference in Kaplan-Meier failure estimate between a contemporary reference and implants with at least 250 at risk at 7 years since primary in females <55 years**

| <b>Stem/cup brand</b>    | <b>Number at risk</b> | <b>Cumulative failure (%)</b> | <b>Difference in failure (%)</b> | <b>95% CI</b>   | <b>Equivalence status</b> | <b>p-value</b> |
|--------------------------|-----------------------|-------------------------------|----------------------------------|-----------------|---------------------------|----------------|
| [CoC] Corail Pinnacle    | 1,321                 | 3.60                          | [REFERENCE]                      |                 |                           |                |
| [CoC] Accolade Trident   | 370                   | 3.66                          | 0.06                             | [-1.38 , 1.51]  | Non-inferiority not shown | 0.930          |
| [CoC] Exeter V40 Trident | 982                   | 2.07                          | -1.53                            | [-2.47 , -0.60] | Non-inferior              | 0.001          |



**Supplemental table 4a: Difference in Kaplan-Meier failure estimate between a contemporary reference and implants with at least 250 at risk at 3 years since primary in females between 55 and 75 years**

| Stem/cup brand                                                | Number at risk | Cumulative failure (%) | Difference in failure (%) | 95% CI         | Equivalence status        | p-value |
|---------------------------------------------------------------|----------------|------------------------|---------------------------|----------------|---------------------------|---------|
| [MoP] Exeter V40 Elite Plus Cemented Cup                      | 1,360          | 0.44                   | [REFERENCE]               |                |                           |         |
| [CoC] ABG II Monolithic Cementless Stem ABG II Cementless Cup | 375            | 1.57                   | 1.13                      | [-0.16 , 2.42] | Non-inferiority not shown | 0.087   |
| [CoC] ABG II Monolithic Cementless Stem Trident               | 325            | 2.05                   | 1.61                      | [ 0.07 , 3.14] | Non-inferiority not shown | 0.041   |
| [CoC] Accolade Trident                                        | 2,547          | 1.62                   | 1.18                      | [ 0.60 , 1.75] | Inferior by $\geq 100\%$  | <0.001  |
| [CoC] Bimetric Cementless Stem Exceed ABT                     | 407            | 1.48                   | 1.04                      | [-0.10 , 2.17] | Non-inferiority not shown | 0.074   |
| [CoC] C-Stem AMT Cemented Stem Pinnacle                       | 368            | 1.00                   | 0.56                      | [-0.38 , 1.50] | Non-inferiority not shown | 0.245   |
| [CoC] CPT Continuum                                           | 275            | 0.90                   | 0.45                      | [-0.61 , 1.52] | Non-inferiority not shown | 0.405   |
| [CoC] Corail Delta TT                                         | 293            | 2.02                   | 1.58                      | [ 0.29 , 2.86] | Inferior by $\geq 20\%$   | 0.016   |
| [CoC] Corail DeltaMotion                                      | 347            | 0.95                   | 0.51                      | [-0.48 , 1.50] | Non-inferiority not shown | 0.312   |
| [CoC] Corail Duraloc Option                                   | 382            | 1.52                   | 1.08                      | [-0.17 , 2.33] | Non-inferiority not shown | 0.092   |
| [CoC] Corail Pinnacle                                         | 9,567          | 1.41                   | 0.97                      | [ 0.57 , 1.36] | Inferior by $\geq 100\%$  | <0.001  |
| [CoC] Excia Cementless Plasmacup SC                           | 325            | 1.03                   | 0.58                      | [-0.48 , 1.64] | Non-inferiority not shown | 0.281   |
| [CoC] Exeter V40 ABG II Cementless Cup                        | 640            | 0.41                   | -0.03                     | [-0.60 , 0.54] | Non-inferiority not shown | 0.909   |
| [CoC] Exeter V40 Trident                                      | 3,977          | 0.95                   | 0.50                      | [ 0.07 , 0.94] | Non-inferiority not shown | 0.024   |
| [CoC] Furlong HAC Stem CSF                                    | 620            | 1.73                   | 1.28                      | [ 0.22 , 2.34] | Inferior by $\geq 20\%$   | 0.018   |
| [CoC] Furlong HAC Stem Furlong HAC CSF Plus                   | 3,449          | 1.59                   | 1.15                      | [ 0.66 , 1.63] | Inferior by $\geq 100\%$  | <0.001  |
| [CoC] M/L Taper Cementless Continuum                          | 363            | 1.61                   | 1.16                      | [ 0.01 , 2.32] | Non-inferiority not shown | 0.048   |
| [CoC] Metafix Stem Trinity                                    | 290            | 1.39                   | 0.94                      | [-0.16 , 2.04] | Non-inferiority not shown | 0.093   |
| [CoC] Polarstem Cementless R3 Cementless                      | 370            | 0.84                   | 0.40                      | [-0.49 , 1.29] | Non-inferiority not shown | 0.377   |
| [CoC] SL-Plus Cementless Stem EP-Fit Plus                     | 376            | 1.53                   | 1.09                      | [-0.17 , 2.34] | Non-inferiority not shown | 0.091   |
| [CoC] Taperloc Cementless Stem Exceed ABT                     | 2,580          | 1.46                   | 1.01                      | [ 0.50 , 1.53] | Inferior by $\geq 100\%$  | <0.001  |
| [CoP] Accolade Trident                                        | 1,324          | 1.44                   | 0.99                      | [ 0.36 , 1.63] | Inferior by $\geq 20\%$   | 0.002   |
| [CoP] C-Stem Cemented Stem Elite Plus Ogee                    | 279            | 0.35                   | -0.09                     | [-0.85 , 0.66] | Non-inferiority not shown | 0.807   |
| [CoP] C-Stem Cemented Stem Marathon                           | 364            | 0.59                   | 0.15                      | [-0.62 , 0.91] | Non-inferiority not shown | 0.706   |
| [CoP] C-Stem Cemented Stem Opera                              | 295            | 0.00                   | --                        | [ -- , --]     | No failures to date       |         |
| [CoP] C-Stem Cemented Stem Wroblewski Golf Ball               | 346            | 0.53                   | 0.08                      | [-0.72 , 0.89] | Non-inferiority not shown | 0.836   |
| [CoP] CPT Trilogy                                             | 573            | 1.20                   | 0.75                      | [ 0.13 , 1.38] | Inferior by $\geq 20\%$   | 0.018   |
| [CoP] Corail Charnley and Elite Plus LPW                      | 296            | 2.41                   | 1.97                      | [ 0.28 , 3.65] | Inferior by $\geq 20\%$   | 0.022   |
| [CoP] Corail Marathon                                         | 559            | 0.73                   | 0.29                      | [-0.35 , 0.93] | Non-inferiority not shown | 0.378   |
| [CoP] Corail Pinnacle                                         | 3,489          | 1.19                   | 0.75                      | [ 0.33 , 1.17] | Inferior by $\geq 20\%$   | <0.001  |
| [CoP] Corail Trilogy                                          | 355            | 0.81                   | 0.37                      | [-0.60 , 1.34] | Non-inferiority not shown | 0.460   |
| [CoP] Exeter V40 Charnley and Elite Plus LPW                  | 355            | 1.69                   | 1.24                      | [ 0.03 , 2.45] | Non-inferiority not shown | 0.044   |
| [CoP] Exeter V40 Elite Plus Ogee                              | 529            | 0.70                   | 0.26                      | [-0.44 , 0.95] | Non-inferiority not shown | 0.468   |
| [CoP] Exeter V40 Exeter Contemporary Flanged                  | 1,464          | 1.06                   | 0.62                      | [ 0.05 , 1.18] | Non-inferiority not shown | 0.032   |
| [CoP] Exeter V40 Exeter Contemporary Hooded                   | 376            | 1.55                   | 1.11                      | [-0.08 , 2.30] | Non-inferiority not shown | 0.068   |
| [CoP] Exeter V40 Exeter Duration                              | 369            | 0.98                   | 0.54                      | [-0.48 , 1.55] | Non-inferiority not shown | 0.299   |
| [CoP] Exeter V40 Exeter X3 Rimfit                             | 896            | 0.66                   | 0.22                      | [-0.27 , 0.70] | Non-inferiority not shown | 0.385   |
| [CoP] Exeter V40 Trident                                      | 2,023          | 1.02                   | 0.57                      | [ 0.12 , 1.03] | Inferior by $\geq 20\%$   | 0.014   |
| [CoP] Exeter V40 Trilogy                                      | 896            | 0.61                   | 0.16                      | [-0.42 , 0.75] | Non-inferiority not shown | 0.587   |
| [CoP] Furlong HAC Stem CSF                                    | 2,797          | 1.29                   | 0.85                      | [ 0.33 , 1.37] | Inferior by $\geq 20\%$   | 0.001   |

|                                                            |        |      |       |                |                           |        |
|------------------------------------------------------------|--------|------|-------|----------------|---------------------------|--------|
| [CoP] Furlong HAC Stem Furlong HAC CSF Plus                | 660    | 2.00 | 1.56  | [ 0.58 , 2.54] | Inferior by $\geq 100\%$  | 0.002  |
| [CoP] MS-30 Original ME Muller Low Profile Cup             | 785    | 0.57 | 0.13  | [-0.47 , 0.73] | Non-inferiority not shown | 0.674  |
| [CoP] SL-Plus Cementless Stem EP-Fit Plus                  | 368    | 1.82 | 1.38  | [-0.00 , 2.75] | Non-inferiority not shown | 0.050  |
| [CoP] Taperloc Cementless Stem Exceed ABT                  | 789    | 1.04 | 0.60  | [-0.03 , 1.22] | Non-inferiority not shown | 0.062  |
| [MoP] Accolade Trident                                     | 3,609  | 1.81 | 1.36  | [ 0.84 , 1.89] | Inferior by $\geq 100\%$  | <0.001 |
| [MoP] Anthology R3 Cementless                              | 506    | 1.00 | 0.56  | [-0.18 , 1.29] | Non-inferiority not shown | 0.138  |
| [MoP] C-Stem AMT Cemented Stem Charnley and Elite Plus LPW | 779    | 0.76 | 0.32  | [-0.34 , 0.97] | Non-inferiority not shown | 0.341  |
| [MoP] C-Stem AMT Cemented Stem Elite Plus Ogee             | 482    | 0.79 | 0.35  | [-0.43 , 1.12] | Non-inferiority not shown | 0.380  |
| [MoP] C-Stem AMT Cemented Stem Marathon                    | 406    | 1.09 | 0.65  | [-0.12 , 1.42] | Non-inferiority not shown | 0.099  |
| [MoP] C-Stem AMT Cemented Stem Pinnacle                    | 609    | 1.05 | 0.60  | [-0.07 , 1.27] | Non-inferiority not shown | 0.077  |
| [MoP] C-Stem Cemented Stem Charnley Ogee                   | 400    | 1.80 | 1.35  | [ 0.07 , 2.64] | Non-inferiority not shown | 0.038  |
| [MoP] C-Stem Cemented Stem Charnley and Elite Plus LPW     | 727    | 1.04 | 0.60  | [-0.19 , 1.39] | Non-inferiority not shown | 0.138  |
| [MoP] C-Stem Cemented Stem Duraloc Cementless Cup          | 298    | 1.64 | 1.20  | [-0.27 , 2.67] | Non-inferiority not shown | 0.109  |
| [MoP] C-Stem Cemented Stem Elite Plus Ogee                 | 1,130  | 0.91 | 0.47  | [-0.14 , 1.08] | Non-inferiority not shown | 0.132  |
| [MoP] C-Stem Cemented Stem Marathon                        | 616    | 0.67 | 0.22  | [-0.37 , 0.82] | Non-inferiority not shown | 0.461  |
| [MoP] C-Stem Cemented Stem Opera                           | 541    | 0.71 | 0.26  | [-0.50 , 1.03] | Non-inferiority not shown | 0.500  |
| [MoP] C-Stem Cemented Stem Wroblewski Golf Ball            | 397    | 0.48 | 0.04  | [-0.71 , 0.78] | Non-inferiority not shown | 0.925  |
| [MoP] CCA Cemented Stem CCB Cup                            | 457    | 0.34 | -0.10 | [-0.68 , 0.47] | Non-inferiority not shown | 0.728  |
| [MoP] CLS Cementless Stem Allofit                          | 259    | 1.45 | 1.01  | [-0.44 , 2.46] | Non-inferiority not shown | 0.174  |
| [MoP] CPCS Opera                                           | 488    | 1.19 | 0.75  | [-0.26 , 1.75] | Non-inferiority not shown | 0.145  |
| [MoP] CPT Allofit                                          | 386    | 0.16 | -0.28 | [-0.74 , 0.17] | Non-inferiority not shown | 0.220  |
| [MoP] CPT Elite Plus Ogee                                  | 922    | 1.28 | 0.84  | [ 0.07 , 1.61] | Non-inferiority not shown | 0.032  |
| [MoP] CPT Original ME Muller Low Profile Cup               | 324    | 0.92 | 0.48  | [-0.48 , 1.44] | Non-inferiority not shown | 0.329  |
| [MoP] CPT Pinnacle                                         | 290    | 0.64 | 0.20  | [-0.75 , 1.15] | Non-inferiority not shown | 0.680  |
| [MoP] CPT Trabecular Metal Modular Cementless Cup          | 317    | 2.73 | 2.29  | [ 0.72 , 3.86] | Inferior by $\geq 100\%$  | 0.004  |
| [MoP] CPT Trilogy                                          | 3,394  | 1.23 | 0.79  | [ 0.32 , 1.26] | Inferior by $\geq 20\%$   | 0.001  |
| [MoP] CPT ZCA                                              | 2,305  | 1.24 | 0.79  | [ 0.28 , 1.31] | Inferior by $\geq 20\%$   | 0.003  |
| [MoP] Charnley Cemented Stem Charnley Cemented Cup         | 1,559  | 0.98 | 0.54  | [-0.04 , 1.12] | Non-inferiority not shown | 0.069  |
| [MoP] Charnley Cemented Stem Charnley Ogee                 | 3,266  | 1.18 | 0.73  | [ 0.25 , 1.22] | Inferior by $\geq 20\%$   | 0.003  |
| [MoP] Charnley Cemented Stem Charnley and Elite Plus LPW   | 2,255  | 0.68 | 0.23  | [-0.24 , 0.70] | Non-inferiority not shown | 0.331  |
| [MoP] Charnley Cemented Stem Opera                         | 498    | 0.39 | -0.05 | [-0.69 , 0.58] | Non-inferiority not shown | 0.868  |
| [MoP] Charnley Cemented Stem Wroblewski Golf Ball          | 333    | 1.43 | 0.98  | [-0.30 , 2.27] | Non-inferiority not shown | 0.134  |
| [MoP] Corail Charnley and Elite Plus LPW                   | 334    | 0.23 | -0.21 | [-0.77 , 0.35] | Non-inferiority not shown | 0.454  |
| [MoP] Corail Duraloc Cementless Cup                        | 1,523  | 1.59 | 1.14  | [ 0.44 , 1.84] | Inferior by $\geq 20\%$   | 0.001  |
| [MoP] Corail Elite Plus Cemented Cup                       | 354    | 0.25 | -0.20 | [-0.78 , 0.39] | Non-inferiority not shown | 0.510  |
| [MoP] Corail Elite Plus Ogee                               | 546    | 1.03 | 0.58  | [-0.24 , 1.41] | Non-inferiority not shown | 0.167  |
| [MoP] Corail Marathon                                      | 1,156  | 0.74 | 0.30  | [-0.21 , 0.80] | Non-inferiority not shown | 0.246  |
| [MoP] Corail Pinnacle                                      | 11,626 | 1.15 | 0.71  | [ 0.34 , 1.08] | Inferior by $\geq 20\%$   | <0.001 |
| [MoP] Corail Trilogy                                       | 680    | 0.78 | 0.34  | [-0.37 , 1.04] | Non-inferiority not shown | 0.350  |
| [MoP] Exeter V40 ABG II Cementless Cup                     | 288    | 1.01 | 0.56  | [-0.62 , 1.74] | Non-inferiority not shown | 0.351  |
| [MoP] Exeter V40 Cenator Cemented Cup                      | 721    | 1.68 | 1.24  | [ 0.27 , 2.20] | Inferior by $\geq 20\%$   | 0.012  |
| [MoP] Exeter V40 Charnley Ogee                             | 658    | 1.07 | 0.63  | [-0.18 , 1.44] | Non-inferiority not shown | 0.129  |
| [MoP] Exeter V40 Charnley and Elite Plus LPW               | 943    | 1.27 | 0.82  | [ 0.11 , 1.54] | Inferior by $\geq 20\%$   | 0.025  |
| [MoP] Exeter V40 Duraloc Cementless Cup                    | 509    | 0.77 | 0.33  | [-0.49 , 1.15] | Non-inferiority not shown | 0.437  |
| [MoP] Exeter V40 EP-Fit Plus                               | 265    | 1.11 | 0.67  | [-0.63 , 1.96] | Non-inferiority not shown | 0.312  |
| [MoP] Exeter V40 Elite Plus Ogee                           | 5,613  | 0.77 | 0.33  | [-0.07 , 0.72] | Non-inferiority not shown | 0.103  |

|                                                               |        |      |      |                |                           |        |
|---------------------------------------------------------------|--------|------|------|----------------|---------------------------|--------|
| [MoP] Exeter V40 Exeter Contemporary Flanged                  | 14,698 | 0.81 | 0.36 | [ 0.01 , 0.72] | Non-inferiority not shown | 0.043  |
| [MoP] Exeter V40 Exeter Contemporary Hooded                   | 5,787  | 1.59 | 1.14 | [ 0.70 , 1.58] | Inferior by $\geq 100\%$  | <0.001 |
| [MoP] Exeter V40 Exeter Duration                              | 4,914  | 1.14 | 0.70 | [ 0.26 , 1.13] | Inferior by $\geq 20\%$   | 0.002  |
| [MoP] Exeter V40 Exeter X3 Rimfit                             | 1,966  | 0.71 | 0.27 | [-0.15 , 0.68] | Non-inferiority not shown | 0.210  |
| [MoP] Exeter V40 Marathon                                     | 486    | 0.87 | 0.42 | [-0.31 , 1.16] | Non-inferiority not shown | 0.261  |
| [MoP] Exeter V40 Opera                                        | 876    | 0.86 | 0.41 | [-0.26 , 1.09] | Non-inferiority not shown | 0.232  |
| [MoP] Exeter V40 Pinnacle                                     | 1,011  | 1.06 | 0.61 | [-0.02 , 1.25] | Non-inferiority not shown | 0.058  |
| [MoP] Exeter V40 Reflection Cementless                        | 785    | 0.74 | 0.30 | [-0.38 , 0.97] | Non-inferiority not shown | 0.389  |
| [MoP] Exeter V40 Trident                                      | 6,447  | 1.11 | 0.67 | [ 0.28 , 1.06] | Inferior by $\geq 20\%$   | 0.001  |
| [MoP] Exeter V40 Trilogy                                      | 3,453  | 0.79 | 0.34 | [-0.09 , 0.77] | Non-inferiority not shown | 0.119  |
| [MoP] Exeter V40 Ultima Cemented Cup                          | 425    | 1.38 | 0.93 | [-0.21 , 2.08] | Non-inferiority not shown | 0.109  |
| [MoP] Furlong Cemented Stem JRI Cemented Cup                  | 495    | 1.90 | 1.46 | [ 0.24 , 2.67] | Inferior by $\geq 20\%$   | 0.019  |
| [MoP] Furlong HAC Stem CSF                                    | 2,428  | 1.91 | 1.47 | [ 0.85 , 2.08] | Inferior by $\geq 100\%$  | <0.001 |
| [MoP] Furlong HAC Stem Furlong HAC CSF Plus                   | 1,020  | 1.79 | 1.35 | [ 0.60 , 2.10] | Inferior by $\geq 100\%$  | <0.001 |
| [MoP] M/L Taper Cementless Continuum                          | 253    | 1.51 | 1.07 | [-0.14 , 2.28] | Non-inferiority not shown | 0.084  |
| [MoP] Muller Straight Stem Original ME Muller Low Profile Cup | 530    | 1.06 | 0.62 | [-0.24 , 1.47] | Non-inferiority not shown | 0.157  |
| [MoP] Muller-Biomet Apollo                                    | 634    | 1.93 | 1.49 | [ 0.40 , 2.58] | Inferior by $\geq 20\%$   | 0.008  |
| [MoP] Muller-Biomet Original ME Muller Low Profile Cup        | 362    | 1.57 | 1.12 | [-0.16 , 2.41] | Non-inferiority not shown | 0.087  |
| [MoP] Omnifit Cemented Stem ODC                               | 358    | 1.63 | 1.19 | [-0.15 , 2.53] | Non-inferiority not shown | 0.081  |
| [MoP] Polarstem Cementless R3 Cementless                      | 355    | 0.64 | 0.20 | [-0.35 , 0.75] | Non-inferiority not shown | 0.479  |
| [MoP] SL-Plus Cementless Stem EP-Fit Plus                     | 857    | 3.12 | 2.68 | [ 1.56 , 3.79] | Inferior by $\geq 100\%$  | <0.001 |
| [MoP] SP II Cemented Stem Interplanta                         | 258    | 2.11 | 1.67 | [-0.04 , 3.37] | Non-inferiority not shown | 0.055  |
| [MoP] Stanmore Modular Stem SHP Cup                           | 298    | 0.89 | 0.44 | [-0.61 , 1.49] | Non-inferiority not shown | 0.411  |
| [MoP] Stanmore Modular Stem Stanmore-Arcom Cup                | 1,365  | 1.33 | 0.89 | [ 0.22 , 1.56] | Inferior by $\geq 20\%$   | 0.009  |
| [MoP] Synergy Cementless Stem R3 Cementless                   | 363    | 0.63 | 0.19 | [-0.46 , 0.83] | Non-inferiority not shown | 0.571  |
| [MoP] Synergy Cementless Stem Reflection Cementless           | 598    | 0.81 | 0.37 | [-0.41 , 1.15] | Non-inferiority not shown | 0.357  |
| [MoP] Taperloc Cementless Stem Exceed ABT                     | 1,475  | 2.08 | 1.63 | [ 0.94 , 2.33] | Inferior by $\geq 100\%$  | <0.001 |
| [MoP] Versys Cementless Stem Trilogy                          | 363    | 3.38 | 2.94 | [ 1.10 , 4.78] | Inferior by $\geq 100\%$  | 0.002  |

**Supplemental table 4b: Difference in Kaplan-Meier failure estimate between a contemporary reference and implants with at least 250 at risk at 5 years since primary in females between 55 and 75 years**

| Stem/cup brand                                                | Number at risk | Cumulative failure (%) | Difference in failure (%) | 95% CI         | Equivalence status        | p-value |
|---------------------------------------------------------------|----------------|------------------------|---------------------------|----------------|---------------------------|---------|
| [MoP] Exeter V40 Elite Plus Cemented Cup                      | 1,039          | 0.52                   | [REFERENCE]               |                |                           |         |
| [CoC] ABG II Monolithic Cementless Stem ABG II Cementless Cup | 363            | 1.84                   | 1.32                      | [-0.08 , 2.71] | Non-inferiority not shown | 0.064   |
| [CoC] ABG II Monolithic Cementless Stem Trident               | 250            | 3.09                   | 2.57                      | [ 0.64 , 4.49] | Inferior by $\geq 100\%$  | 0.009   |
| [CoC] Accolade Trident                                        | 2,044          | 2.56                   | 2.04                      | [ 1.33 , 2.75] | Inferior by $\geq 100\%$  | <0.001  |
| [CoC] Bimetric Cementless Stem Exceed ABT                     | 289            | 2.32                   | 1.80                      | [ 0.32 , 3.28] | Inferior by $\geq 20\%$   | 0.017   |
| [CoC] Corail Duraloc Option                                   | 370            | 2.82                   | 2.30                      | [ 0.62 , 3.99] | Inferior by $\geq 100\%$  | 0.007   |
| [CoC] Corail Pinnacle                                         | 6,445          | 1.82                   | 1.30                      | [ 0.86 , 1.74] | Inferior by $\geq 100\%$  | <0.001  |

|                                                            |       |      |      |                |                           |        |
|------------------------------------------------------------|-------|------|------|----------------|---------------------------|--------|
| [CoC] Exeter V40 ABG II Cementless Cup                     | 563   | 1.05 | 0.53 | [-0.33 , 1.38] | Non-inferiority not shown | 0.225  |
| [CoC] Exeter V40 Trident                                   | 3,263 | 1.29 | 0.77 | [ 0.27 , 1.26] | Inferior by $\geq 20\%$   | 0.002  |
| [CoC] Furlong HAC Stem CSF                                 | 597   | 2.05 | 1.53 | [ 0.37 , 2.68] | Inferior by $\geq 20\%$   | 0.010  |
| [CoC] Furlong HAC Stem Furlong HAC CSF Plus                | 2,167 | 1.86 | 1.34 | [ 0.80 , 1.88] | Inferior by $\geq 100\%$  | <0.001 |
| [CoC] SL-Plus Cementless Stem EP-Fit Plus                  | 352   | 3.15 | 2.63 | [ 0.84 , 4.43] | Inferior by $\geq 100\%$  | 0.004  |
| [CoC] Taperloc Cementless Stem Exceed ABT                  | 1,583 | 1.68 | 1.16 | [ 0.59 , 1.72] | Inferior by $\geq 100\%$  | <0.001 |
| [CoP] Accolade Trident                                     | 638   | 1.84 | 1.32 | [ 0.56 , 2.08] | Inferior by $\geq 100\%$  | 0.001  |
| [CoP] C-Stem Cemented Stem Wroblewski Golf Ball            | 283   | 0.82 | 0.30 | [-0.69 , 1.30] | Non-inferiority not shown | 0.549  |
| [CoP] Corail Pinnacle                                      | 1,874 | 1.58 | 1.06 | [ 0.56 , 1.57] | Inferior by $\geq 100\%$  | <0.001 |
| [CoP] Corail Trilogy                                       | 327   | 1.09 | 0.57 | [-0.55 , 1.70] | Non-inferiority not shown | 0.317  |
| [CoP] Exeter V40 Elite Plus Ogee                           | 397   | 1.31 | 0.79 | [-0.20 , 1.77] | Non-inferiority not shown | 0.117  |
| [CoP] Exeter V40 Exeter Contemporary Flanged               | 964   | 1.38 | 0.86 | [ 0.20 , 1.52] | Inferior by $\geq 20\%$   | 0.011  |
| [CoP] Exeter V40 Exeter Contemporary Hooded                | 290   | 1.82 | 1.30 | [-0.01 , 2.60] | Non-inferiority not shown | 0.051  |
| [CoP] Exeter V40 Exeter Duration                           | 325   | 0.98 | 0.46 | [-0.56 , 1.49] | Non-inferiority not shown | 0.377  |
| [CoP] Exeter V40 Trident                                   | 999   | 1.37 | 0.86 | [ 0.28 , 1.43] | Inferior by $\geq 20\%$   | 0.003  |
| [CoP] Exeter V40 Trilogy                                   | 748   | 0.72 | 0.20 | [-0.44 , 0.84] | Non-inferiority not shown | 0.540  |
| [CoP] Furlong HAC Stem CSF                                 | 2,437 | 1.82 | 1.30 | [ 0.69 , 1.90] | Inferior by $\geq 100\%$  | <0.001 |
| [CoP] Furlong HAC Stem Furlong HAC CSF Plus                | 397   | 2.25 | 1.73 | [ 0.63 , 2.83] | Inferior by $\geq 100\%$  | 0.002  |
| [CoP] MS-30 Original ME Muller Low Profile Cup             | 576   | 0.72 | 0.21 | [-0.48 , 0.89] | Non-inferiority not shown | 0.557  |
| [CoP] SL-Plus Cementless Stem EP-Fit Plus                  | 317   | 3.48 | 2.96 | [ 1.07 , 4.86] | Inferior by $\geq 100\%$  | 0.002  |
| [CoP] Taperloc Cementless Stem Exceed ABT                  | 355   | 1.36 | 0.84 | [ 0.06 , 1.61] | Non-inferiority not shown | 0.035  |
| [MoP] Accolade Trident                                     | 2,455 | 2.47 | 1.95 | [ 1.34 , 2.56] | Inferior by $\geq 100\%$  | <0.001 |
| [MoP] C-Stem AMT Cemented Stem Charnley and Elite Plus LPW | 556   | 1.17 | 0.65 | [-0.16 , 1.46] | Non-inferiority not shown | 0.117  |
| [MoP] C-Stem AMT Cemented Stem Elite Plus Ogee             | 319   | 1.54 | 1.02 | [-0.14 , 2.18] | Non-inferiority not shown | 0.084  |
| [MoP] C-Stem AMT Cemented Stem Pinnacle                    | 308   | 1.68 | 1.16 | [ 0.17 , 2.14] | Inferior by $\geq 20\%$   | 0.021  |
| [MoP] C-Stem Cemented Stem Charnley Ogee                   | 335   | 2.64 | 2.12 | [ 0.53 , 3.71] | Inferior by $\geq 100\%$  | 0.009  |
| [MoP] C-Stem Cemented Stem Charnley and Elite Plus LPW     | 671   | 1.88 | 1.36 | [ 0.32 , 2.41] | Inferior by $\geq 20\%$   | 0.010  |
| [MoP] C-Stem Cemented Stem Duraloc Cementless Cup          | 285   | 2.32 | 1.80 | [ 0.06 , 3.54] | Non-inferiority not shown | 0.042  |
| [MoP] C-Stem Cemented Stem Elite Plus Ogee                 | 906   | 1.40 | 0.88 | [ 0.12 , 1.63] | Inferior by $\geq 20\%$   | 0.023  |
| [MoP] C-Stem Cemented Stem Marathon                        | 330   | 0.67 | 0.15 | [-0.46 , 0.76] | Non-inferiority not shown | 0.633  |
| [MoP] C-Stem Cemented Stem Opera                           | 407   | 0.90 | 0.38 | [-0.48 , 1.24] | Non-inferiority not shown | 0.390  |
| [MoP] C-Stem Cemented Stem Wroblewski Golf Ball            | 324   | 1.57 | 1.05 | [-0.25 , 2.36] | Non-inferiority not shown | 0.113  |
| [MoP] CCA Cemented Stem CCB Cup                            | 327   | 0.61 | 0.09 | [-0.70 , 0.88] | Non-inferiority not shown | 0.827  |
| [MoP] CPCS Opera                                           | 367   | 2.09 | 1.57 | [ 0.24 , 2.91] | Inferior by $\geq 20\%$   | 0.021  |
| [MoP] CPT Elite Plus Ogee                                  | 691   | 1.65 | 1.13 | [ 0.25 , 2.01] | Inferior by $\geq 20\%$   | 0.012  |
| [MoP] CPT Pinnacle                                         | 254   | 1.40 | 0.88 | [-0.53 , 2.29] | Non-inferiority not shown | 0.223  |
| [MoP] CPT Trilogy                                          | 2,468 | 2.22 | 1.70 | [ 1.10 , 2.30] | Inferior by $\geq 100\%$  | <0.001 |
| [MoP] CPT ZCA                                              | 1,787 | 2.02 | 1.50 | [ 0.84 , 2.15] | Inferior by $\geq 100\%$  | <0.001 |
| [MoP] Charnley Cemented Stem Charnley Cemented Cup         | 1,420 | 1.52 | 1.00 | [ 0.30 , 1.70] | Inferior by $\geq 20\%$   | 0.005  |
| [MoP] Charnley Cemented Stem Charnley Ogee                 | 2,959 | 1.84 | 1.32 | [ 0.74 , 1.90] | Inferior by $\geq 100\%$  | <0.001 |
| [MoP] Charnley Cemented Stem Charnley and Elite Plus LPW   | 2,049 | 1.18 | 0.67 | [ 0.09 , 1.24] | Non-inferiority not shown | 0.023  |
| [MoP] Charnley Cemented Stem Opera                         | 454   | 1.22 | 0.70 | [-0.34 , 1.73] | Non-inferiority not shown | 0.185  |
| [MoP] Charnley Cemented Stem Wroblewski Golf Ball          | 277   | 1.77 | 1.26 | [-0.20 , 2.71] | Non-inferiority not shown | 0.091  |
| [MoP] Corail Duraloc Cementless Cup                        | 1,465 | 2.31 | 1.79 | [ 0.96 , 2.62] | Inferior by $\geq 100\%$  | <0.001 |
| [MoP] Corail Elite Plus Cemented Cup                       | 277   | 0.55 | 0.03 | [-0.81 , 0.87] | Non-inferiority not shown | 0.947  |
| [MoP] Corail Elite Plus Ogee                               | 418   | 1.62 | 1.10 | [ 0.03 , 2.17] | Non-inferiority not shown | 0.044  |

|                                                               |        |      |      |                |                           |        |
|---------------------------------------------------------------|--------|------|------|----------------|---------------------------|--------|
| [MoP] Corail Marathon                                         | 586    | 0.96 | 0.44 | [-0.16 , 1.05] | Non-inferiority not shown | 0.153  |
| [MoP] Corail Pinnacle                                         | 7,089  | 1.41 | 0.89 | [ 0.49 , 1.30] | Inferior by $\geq 20\%$   | <0.001 |
| [MoP] Corail Trilogy                                          | 561    | 0.94 | 0.42 | [-0.36 , 1.20] | Non-inferiority not shown | 0.293  |
| [MoP] Exeter V40 ABG II Cementless Cup                        | 283    | 1.01 | 0.49 | [-0.70 , 1.67] | Non-inferiority not shown | 0.422  |
| [MoP] Exeter V40 Cenator Cemented Cup                         | 611    | 2.67 | 2.15 | [ 0.94 , 3.37] | Inferior by $\geq 100\%$  | <0.001 |
| [MoP] Exeter V40 Charnley Ogee                                | 568    | 1.39 | 0.87 | [-0.06 , 1.79] | Non-inferiority not shown | 0.068  |
| [MoP] Exeter V40 Charnley and Elite Plus LPW                  | 718    | 1.72 | 1.20 | [ 0.34 , 2.05] | Inferior by $\geq 20\%$   | 0.006  |
| [MoP] Exeter V40 Duraloc Cementless Cup                       | 488    | 1.37 | 0.85 | [-0.22 , 1.93] | Non-inferiority not shown | 0.119  |
| [MoP] Exeter V40 EP-Fit Plus                                  | 250    | 3.01 | 2.49 | [ 0.40 , 4.57] | Inferior by $\geq 20\%$   | 0.019  |
| [MoP] Exeter V40 Elite Plus Ogee                              | 4,543  | 1.18 | 0.66 | [ 0.21 , 1.12] | Inferior by $\geq 20\%$   | 0.004  |
| [MoP] Exeter V40 Exeter Contemporary Flanged                  | 10,220 | 1.16 | 0.64 | [ 0.25 , 1.04] | Inferior by $\geq 20\%$   | 0.001  |
| [MoP] Exeter V40 Exeter Contemporary Hooded                   | 4,277  | 2.45 | 1.93 | [ 1.40 , 2.46] | Inferior by $\geq 100\%$  | <0.001 |
| [MoP] Exeter V40 Exeter Duration                              | 4,048  | 1.48 | 0.96 | [ 0.47 , 1.44] | Inferior by $\geq 20\%$   | <0.001 |
| [MoP] Exeter V40 Exeter X3 Rimfit                             | 319    | 0.71 | 0.19 | [-0.25 , 0.63] | Non-inferiority not shown | 0.395  |
| [MoP] Exeter V40 Opera                                        | 655    | 1.22 | 0.70 | [-0.10 , 1.50] | Non-inferiority not shown | 0.088  |
| [MoP] Exeter V40 Pinnacle                                     | 658    | 1.40 | 0.88 | [ 0.12 , 1.64] | Inferior by $\geq 20\%$   | 0.023  |
| [MoP] Exeter V40 Reflection Cementless                        | 732    | 1.14 | 0.62 | [-0.20 , 1.44] | Non-inferiority not shown | 0.141  |
| [MoP] Exeter V40 Trident                                      | 4,016  | 1.44 | 0.92 | [ 0.47 , 1.36] | Inferior by $\geq 20\%$   | <0.001 |
| [MoP] Exeter V40 Trilogy                                      | 2,821  | 1.20 | 0.68 | [ 0.17 , 1.18] | Inferior by $\geq 20\%$   | 0.009  |
| [MoP] Exeter V40 Ultima Cemented Cup                          | 408    | 2.56 | 2.04 | [ 0.51 , 3.58] | Inferior by $\geq 20\%$   | 0.009  |
| [MoP] Furlong Cemented Stem JRI Cemented Cup                  | 458    | 2.52 | 2.00 | [ 0.60 , 3.41] | Inferior by $\geq 100\%$  | 0.005  |
| [MoP] Furlong HAC Stem CSF                                    | 2,056  | 2.08 | 1.56 | [ 0.91 , 2.22] | Inferior by $\geq 100\%$  | <0.001 |
| [MoP] Furlong HAC Stem Furlong HAC CSF Plus                   | 633    | 2.82 | 2.30 | [ 1.26 , 3.34] | Inferior by $\geq 100\%$  | <0.001 |
| [MoP] Muller Straight Stem Original ME Muller Low Profile Cup | 395    | 1.47 | 0.95 | [-0.08 , 1.98] | Non-inferiority not shown | 0.071  |
| [MoP] Muller-Biomet Apollo                                    | 535    | 2.11 | 1.59 | [ 0.44 , 2.74] | Inferior by $\geq 20\%$   | 0.007  |
| [MoP] Omnifit Cemented Stem ODC                               | 340    | 2.48 | 1.96 | [ 0.32 , 3.60] | Inferior by $\geq 20\%$   | 0.019  |
| [MoP] SL-Plus Cementless Stem EP-Fit Plus                     | 739    | 3.85 | 3.33 | [ 2.07 , 4.59] | Inferior by $\geq 100\%$  | <0.001 |
| [MoP] Stanmore Modular Stem Stanmore-Arcom Cup                | 1,106  | 2.20 | 1.68 | [ 0.83 , 2.53] | Inferior by $\geq 100\%$  | <0.001 |
| [MoP] Synergy Cementless Stem Reflection Cementless           | 577    | 1.15 | 0.63 | [-0.29 , 1.55] | Non-inferiority not shown | 0.179  |
| [MoP] Taperloc Cementless Stem Exceed ABT                     | 761    | 2.49 | 1.97 | [ 1.18 , 2.77] | Inferior by $\geq 100\%$  | <0.001 |
| [MoP] Versys Cementless Stem Trilogy                          | 342    | 4.74 | 4.22 | [ 2.05 , 6.38] | Inferior by $\geq 100\%$  | <0.001 |

**Supplemental table 4c: Difference in Kaplan-Meier failure estimate between a contemporary reference and implants with at least 250 at risk at 7 years since primary in females between 55 and 75 years**

| Stem/cup brand                                                | Number at risk | Cumulative failure (%) | Difference in failure (%) | 95% CI          | Equivalence status        | p-value |
|---------------------------------------------------------------|----------------|------------------------|---------------------------|-----------------|---------------------------|---------|
| [MoP] Exeter V40 Trilogy                                      | 1,962          | 1.45                   | [REFERENCE]               |                 |                           |         |
| [CoC] ABG II Monolithic Cementless Stem ABG II Cementless Cup | 335            | 2.11                   | 0.66                      | [-0.84 , 2.16]  | Non-inferiority not shown | 0.389   |
| [CoC] Accolade Trident                                        | 1,256          | 3.07                   | 1.62                      | [ 0.81 , 2.44]  | Inferior by $\geq 20\%$   | <0.001  |
| [CoC] Corail Duraloc Option                                   | 301            | 3.15                   | 1.70                      | [-0.11 , 3.50]  | Non-inferiority not shown | 0.065   |
| [CoC] Corail Pinnacle                                         | 2,917          | 2.20                   | 0.76                      | [ 0.25 , 1.26]  | Non-inferiority not shown | 0.004   |
| [CoC] Exeter V40 ABG II Cementless Cup                        | 454            | 1.65                   | 0.20                      | [-0.90 , 1.31]  | Non-inferiority not shown | 0.721   |
| [CoC] Exeter V40 Trident                                      | 2,340          | 1.76                   | 0.31                      | [-0.28 , 0.90]  | Non-inferiority not shown | 0.300   |
| [CoC] Furlong HAC Stem CSF                                    | 549            | 2.90                   | 1.45                      | [ 0.07 , 2.83]  | Non-inferiority not shown | 0.040   |
| [CoC] Furlong HAC Stem Furlong HAC CSF Plus                   | 830            | 2.23                   | 0.78                      | [ 0.12 , 1.44]  | Non-inferiority not shown | 0.021   |
| [CoC] SL-Plus Cementless Stem EP-Fit Plus                     | 295            | 3.46                   | 2.01                      | [ 0.11 , 3.90]  | Non-inferiority not shown | 0.038   |
| [CoC] Taperloc Cementless Stem Exceed ABT                     | 712            | 1.81                   | 0.36                      | [-0.29 , 1.01]  | Non-inferiority not shown | 0.279   |
| [CoP] Accolade Trident                                        | 257            | 2.02                   | 0.57                      | [-0.29 , 1.43]  | Non-inferiority not shown | 0.195   |
| [CoP] Corail Pinnacle                                         | 771            | 1.86                   | 0.41                      | [-0.20 , 1.02]  | Non-inferiority not shown | 0.183   |
| [CoP] Corail Trilogy                                          | 258            | 1.09                   | -0.35                     | [-1.50 , 0.79]  | Non-inferiority not shown | 0.543   |
| [CoP] Exeter V40 Elite Plus Ogee                              | 251            | 1.59                   | 0.15                      | [-1.00 , 1.29]  | Non-inferiority not shown | 0.804   |
| [CoP] Exeter V40 Exeter Contemporary Flanged                  | 563            | 1.38                   | -0.07                     | [-0.76 , 0.61]  | Non-inferiority not shown | 0.839   |
| [CoP] Exeter V40 Exeter Duration                              | 255            | 1.30                   | -0.14                     | [-1.36 , 1.07]  | Non-inferiority not shown | 0.818   |
| [CoP] Exeter V40 Trident                                      | 463            | 1.63                   | 0.19                      | [-0.52 , 0.89]  | Non-inferiority not shown | 0.606   |
| [CoP] Exeter V40 Trilogy                                      | 561            | 1.02                   | -0.43                     | [-1.22 , 0.35]  | Non-inferiority not shown | 0.282   |
| [CoP] Furlong HAC Stem CSF                                    | 2,033          | 2.34                   | 0.90                      | [ 0.20 , 1.60]  | Non-inferiority not shown | 0.012   |
| [CoP] MS-30 Original ME Muller Low Profile Cup                | 374            | 0.72                   | -0.72                     | [-1.43 , -0.01] | Non-inferior              | 0.046   |
| [MoP] Accolade Trident                                        | 1,158          | 3.23                   | 1.79                      | [ 1.03 , 2.54]  | Inferior by $\geq 20\%$   | <0.001  |
| [MoP] C-Stem AMT Cemented Stem Charnley and Elite Plus LPW    | 344            | 1.72                   | 0.28                      | [-0.85 , 1.41]  | Non-inferiority not shown | 0.632   |
| [MoP] C-Stem Cemented Stem Charnley Ogee                      | 284            | 2.97                   | 1.52                      | [-0.20 , 3.24]  | Non-inferiority not shown | 0.084   |
| [MoP] C-Stem Cemented Stem Charnley and Elite Plus LPW        | 617            | 2.66                   | 1.21                      | [-0.04 , 2.46]  | Non-inferiority not shown | 0.058   |
| [MoP] C-Stem Cemented Stem Elite Plus Ogee                    | 733            | 2.13                   | 0.68                      | [-0.29 , 1.65]  | Non-inferiority not shown | 0.170   |
| [MoP] C-Stem Cemented Stem Opera                              | 311            | 1.69                   | 0.24                      | [-1.01 , 1.49]  | Non-inferiority not shown | 0.709   |
| [MoP] CPT Elite Plus Ogee                                     | 470            | 2.58                   | 1.13                      | [-0.08 , 2.34]  | Non-inferiority not shown | 0.067   |
| [MoP] CPT Trilogy                                             | 1,661          | 2.95                   | 1.50                      | [ 0.77 , 2.23]  | Inferior by $\geq 20\%$   | <0.001  |
| [MoP] CPT ZCA                                                 | 1,254          | 2.39                   | 0.94                      | [ 0.20 , 1.68]  | Non-inferiority not shown | 0.013   |
| [MoP] Charnley Cemented Stem Charnley Cemented Cup            | 1,220          | 2.10                   | 0.65                      | [-0.18 , 1.48]  | Non-inferiority not shown | 0.125   |
| [MoP] Charnley Cemented Stem Charnley Ogee                    | 2,422          | 2.20                   | 0.76                      | [ 0.11 , 1.40]  | Non-inferiority not shown | 0.022   |
| [MoP] Charnley Cemented Stem Charnley and Elite Plus LPW      | 1,746          | 1.64                   | 0.20                      | [-0.48 , 0.87]  | Non-inferiority not shown | 0.569   |
| [MoP] Charnley Cemented Stem Opera                            | 345            | 2.16                   | 0.71                      | [-0.68 , 2.10]  | Non-inferiority not shown | 0.316   |
| [MoP] Corail Duraloc Cementless Cup                           | 1,258          | 3.66                   | 2.21                      | [ 1.18 , 3.25]  | Inferior by $\geq 20\%$   | <0.001  |
| [MoP] Corail Elite Plus Ogee                                  | 292            | 1.93                   | 0.48                      | [-0.76 , 1.72]  | Non-inferiority not shown | 0.449   |
| [MoP] Corail Pinnacle                                         | 3,659          | 1.82                   | 0.38                      | [-0.10 , 0.86]  | Non-inferiority not shown | 0.123   |
| [MoP] Corail Trilogy                                          | 369            | 1.65                   | 0.20                      | [-0.93 , 1.34]  | Non-inferiority not shown | 0.725   |
| [MoP] Exeter V40 ABG II Cementless Cup                        | 272            | 1.01                   | -0.44                     | [-1.65 , 0.76]  | Non-inferiority not shown | 0.472   |

|                                                               |       |      |       |                 |                           |        |
|---------------------------------------------------------------|-------|------|-------|-----------------|---------------------------|--------|
| [MoP] Exeter V40 Cenator Cemented Cup                         | 478   | 2.86 | 1.41  | [ 0.13 , 2.69]  | Non-inferiority not shown | 0.030  |
| [MoP] Exeter V40 Charnley Ogee                                | 467   | 1.39 | -0.06 | [-1.01 , 0.89]  | Non-inferiority not shown | 0.897  |
| [MoP] Exeter V40 Charnley and Elite Plus LPW                  | 470   | 2.39 | 0.94  | [-0.15 , 2.03]  | Non-inferiority not shown | 0.091  |
| [MoP] Exeter V40 Duraloc Cementless Cup                       | 392   | 1.79 | 0.34  | [-0.89 , 1.56]  | Non-inferiority not shown | 0.589  |
| [MoP] Exeter V40 Elite Plus Cemented Cup                      | 701   | 0.63 | -0.82 | [-1.40 , -0.23] | Non-inferior              | 0.006  |
| [MoP] Exeter V40 Elite Plus Ogee                              | 3,436 | 1.59 | 0.14  | [-0.38 , 0.67]  | Non-inferiority not shown | 0.593  |
| [MoP] Exeter V40 Exeter Contemporary Flanged                  | 6,755 | 1.51 | 0.06  | [-0.39 , 0.52]  | Non-inferiority not shown | 0.788  |
| [MoP] Exeter V40 Exeter Contemporary Hooded                   | 2,891 | 3.20 | 1.75  | [ 1.12 , 2.38]  | Inferior by $\geq 20\%$   | <0.001 |
| [MoP] Exeter V40 Exeter Duration                              | 3,049 | 2.17 | 0.72  | [ 0.14 , 1.31]  | Non-inferiority not shown | 0.016  |
| [MoP] Exeter V40 Opera                                        | 462   | 1.54 | 0.09  | [-0.84 , 1.02]  | Non-inferiority not shown | 0.850  |
| [MoP] Exeter V40 Pinnacle                                     | 346   | 1.56 | 0.11  | [-0.73 , 0.95]  | Non-inferiority not shown | 0.797  |
| [MoP] Exeter V40 Reflection Cementless                        | 591   | 2.01 | 0.56  | [-0.53 , 1.65]  | Non-inferiority not shown | 0.312  |
| [MoP] Exeter V40 Trident                                      | 2,291 | 2.01 | 0.56  | [ 0.01 , 1.11]  | Non-inferiority not shown | 0.046  |
| [MoP] Exeter V40 Ultima Cemented Cup                          | 379   | 2.80 | 1.36  | [-0.26 , 2.97]  | Non-inferiority not shown | 0.100  |
| [MoP] Furlong Cemented Stem JRI Cemented Cup                  | 416   | 2.97 | 1.52  | [-0.02 , 3.05]  | Non-inferiority not shown | 0.053  |
| [MoP] Furlong HAC Stem CSF                                    | 1,634 | 2.65 | 1.20  | [ 0.44 , 1.96]  | Inferior by $\geq 20\%$   | 0.002  |
| [MoP] Furlong HAC Stem Furlong HAC CSF Plus                   | 270   | 3.32 | 1.87  | [ 0.67 , 3.06]  | Inferior by $\geq 20\%$   | 0.002  |
| [MoP] Muller Straight Stem Original ME Muller Low Profile Cup | 264   | 2.38 | 0.93  | [-0.53 , 2.40]  | Non-inferiority not shown | 0.211  |
| [MoP] Muller-Biomet Apollo                                    | 414   | 2.72 | 1.27  | [-0.08 , 2.62]  | Non-inferiority not shown | 0.065  |
| [MoP] Omnifit Cemented Stem ODC                               | 309   | 3.99 | 2.54  | [ 0.45 , 4.63]  | Inferior by $\geq 20\%$   | 0.017  |
| [MoP] SL-Plus Cementless Stem EP-Fit Plus                     | 586   | 4.42 | 2.97  | [ 1.59 , 4.36]  | Inferior by $\geq 100\%$  | <0.001 |
| [MoP] Stanmore Modular Stem Stanmore-Arcom Cup                | 784   | 2.59 | 1.14  | [ 0.19 , 2.09]  | Non-inferiority not shown | 0.018  |
| [MoP] Synergy Cementless Stem Reflection Cementless           | 432   | 1.74 | 0.29  | [-0.86 , 1.44]  | Non-inferiority not shown | 0.617  |
| [MoP] Versys Cementless Stem Trilogy                          | 318   | 4.74 | 3.29  | [ 1.11 , 5.46]  | Inferior by $\geq 20\%$   | 0.003  |

**Supplemental table 4d: Difference in Kaplan-Meier failure estimate between a contemporary reference and implants with at least 250 at risk at 10 years since primary in females between 55 and 75 years**

| Stem/cup brand                                                | Number at risk | Cumulative failure (%) | Difference in failure (%) | 95% CI          | Equivalence status        | p-value |
|---------------------------------------------------------------|----------------|------------------------|---------------------------|-----------------|---------------------------|---------|
| [MoP] Exeter V40 Elite Plus Ogee                              | 1,609          | 2.16                   | [REFERENCE]               |                 |                           |         |
| [CoC] ABG II Monolithic Cementless Stem ABG II Cementless Cup | 259            | 2.44                   | 0.28                      | [-1.36 , 1.92]  | Non-inferiority not shown | 0.739   |
| [CoC] Corail Pinnacle                                         | 342            | 2.97                   | 0.81                      | [ 0.10 , 1.52]  | Non-inferiority not shown | 0.025   |
| [CoC] Exeter V40 Trident                                      | 727            | 2.29                   | 0.13                      | [-0.60 , 0.85]  | Non-inferiority not shown | 0.731   |
| [CoC] Furlong HAC Stem CSF                                    | 322            | 3.61                   | 1.45                      | [-0.16 , 3.06]  | Non-inferiority not shown | 0.077   |
| [CoP] Exeter V40 Trilogy                                      | 250            | 1.52                   | -0.64                     | [-1.72 , 0.43]  | Non-inferiority not shown | 0.243   |
| [CoP] Furlong HAC Stem CSF                                    | 1,151          | 3.18                   | 1.02                      | [ 0.17 , 1.88]  | Non-inferiority not shown | 0.019   |
| [MoP] C-Stem Cemented Stem Charnley and Elite Plus LPW        | 376            | 3.32                   | 1.16                      | [-0.26 , 2.57]  | Non-inferiority not shown | 0.108   |
| [MoP] C-Stem Cemented Stem Elite Plus Ogee                    | 373            | 2.97                   | 0.81                      | [-0.42 , 2.04]  | Non-inferiority not shown | 0.198   |
| [MoP] CPT Trilogy                                             | 562            | 4.25                   | 2.09                      | [ 1.06 , 3.12]  | Inferior by $\geq 20\%$   | <0.001  |
| [MoP] CPT ZCA                                                 | 520            | 3.72                   | 1.56                      | [ 0.48 , 2.64]  | Inferior by $\geq 20\%$   | 0.005   |
| [MoP] Charnley Cemented Stem Charnley Cemented Cup            | 782            | 3.09                   | 0.93                      | [-0.10 , 1.96]  | Non-inferiority not shown | 0.076   |
| [MoP] Charnley Cemented Stem Charnley Ogee                    | 1,368          | 3.80                   | 1.64                      | [ 0.77 , 2.51]  | Inferior by $\geq 20\%$   | <0.001  |
| [MoP] Charnley Cemented Stem Charnley and Elite Plus LPW      | 1,079          | 2.64                   | 0.48                      | [-0.38 , 1.34]  | Non-inferiority not shown | 0.275   |
| [MoP] Corail Duraloc Cementless Cup                           | 598            | 5.19                   | 3.03                      | [ 1.73 , 4.32]  | Inferior by $\geq 20\%$   | <0.001  |
| [MoP] Corail Pinnacle                                         | 849            | 2.37                   | 0.21                      | [-0.43 , 0.84]  | Non-inferiority not shown | 0.521   |
| [MoP] Exeter V40 Cenator Cemented Cup                         | 312            | 3.32                   | 1.16                      | [-0.28 , 2.59]  | Non-inferiority not shown | 0.114   |
| [MoP] Exeter V40 Charnley Ogee                                | 312            | 1.39                   | -0.77                     | [-1.74 , 0.19]  | Non-inferior              | 0.116   |
| [MoP] Exeter V40 Duraloc Cementless Cup                       | 257            | 3.96                   | 1.80                      | [-0.21 , 3.82]  | Non-inferiority not shown | 0.079   |
| [MoP] Exeter V40 Elite Plus Cemented Cup                      | 305            | 0.89                   | -1.27                     | [-2.07 , -0.48] | Non-inferior              | 0.002   |
| [MoP] Exeter V40 Exeter Contemporary Flanged                  | 2,152          | 2.29                   | 0.13                      | [-0.43 , 0.70]  | Non-inferiority not shown | 0.644   |
| [MoP] Exeter V40 Exeter Contemporary Hooded                   | 1,110          | 4.86                   | 2.70                      | [ 1.83 , 3.56]  | Inferior by $\geq 20\%$   | <0.001  |
| [MoP] Exeter V40 Exeter Duration                              | 1,344          | 3.44                   | 1.28                      | [ 0.51 , 2.05]  | Inferior by $\geq 20\%$   | 0.001   |
| [MoP] Exeter V40 Trident                                      | 523            | 3.05                   | 0.89                      | [ 0.06 , 1.72]  | Non-inferiority not shown | 0.035   |
| [MoP] Exeter V40 Trilogy                                      | 748            | 2.13                   | -0.03                     | [-0.78 , 0.72]  | Non-inferiority not shown | 0.931   |
| [MoP] Furlong Cemented Stem JRI Cemented Cup                  | 268            | 4.14                   | 1.98                      | [ 0.07 , 3.89]  | Non-inferiority not shown | 0.043   |
| [MoP] Furlong HAC Stem CSF                                    | 726            | 3.72                   | 1.56                      | [ 0.60 , 2.51]  | Inferior by $\geq 20\%$   | 0.001   |
| [MoP] Stanmore Modular Stem Stanmore-Arcom Cup                | 329            | 3.31                   | 1.15                      | [-0.00 , 2.30]  | Non-inferiority not shown | 0.050   |



**Supplemental table 5a: Difference in Kaplan-Meier failure estimate between a contemporary reference and implants with at least 250 at risk at 3 years since primary in females >75 years**

| Stem/cup brand                                             | Number at risk | Cumulative failure (%) | Difference in failure (%) | 95% CI         | Equivalence status        | p-value |
|------------------------------------------------------------|----------------|------------------------|---------------------------|----------------|---------------------------|---------|
| [MoP] Charnley Cemented Stem Charnley and Elite Plus LPW   | 1,794          | 0.55                   | [REFERENCE]               |                |                           |         |
| [CoC] Accolade Trident                                     | 251            | 2.21                   | 1.66                      | [-0.12 , 3.44] | Non-inferiority not shown | 0.067   |
| [CoC] Corail Pinnacle                                      | 757            | 2.22                   | 1.67                      | [ 0.67 , 2.66] | Inferior by $\geq 100\%$  | 0.001   |
| [CoC] Furlong HAC Stem Furlong HAC CSF Plus                | 540            | 0.68                   | 0.13                      | [-0.55 , 0.81] | Non-inferiority not shown | 0.700   |
| [CoP] Corail Pinnacle                                      | 431            | 0.69                   | 0.14                      | [-0.48 , 0.76] | Non-inferiority not shown | 0.653   |
| [CoP] Exeter V40 Trident                                   | 424            | 0.34                   | -0.21                     | [-0.72 , 0.30] | Non-inferiority not shown | 0.417   |
| [CoP] Furlong HAC Stem CSF                                 | 693            | 1.24                   | 0.69                      | [-0.14 , 1.52] | Non-inferiority not shown | 0.103   |
| [CoP] MS-30 Original ME Muller Low Profile Cup             | 300            | 0.00                   | --                        | [ -- , -- ]    | No failures to date       |         |
| [MoP] Accolade Trident                                     | 1,623          | 1.59                   | 1.04                      | [ 0.40 , 1.69] | Inferior by $\geq 20\%$   | 0.002   |
| [MoP] C-Stem AMT Cemented Stem Charnley and Elite Plus LPW | 646            | 1.09                   | 0.54                      | [-0.24 , 1.32] | Non-inferiority not shown | 0.176   |
| [MoP] C-Stem AMT Cemented Stem Elite Plus Ogee             | 646            | 0.88                   | 0.33                      | [-0.37 , 1.03] | Non-inferiority not shown | 0.354   |
| [MoP] C-Stem AMT Cemented Stem Marathon                    | 343            | 0.68                   | 0.13                      | [-0.52 , 0.78] | Non-inferiority not shown | 0.691   |
| [MoP] C-Stem AMT Cemented Stem Pinnacle                    | 369            | 1.48                   | 0.93                      | [ 0.12 , 1.74] | Inferior by $\geq 20\%$   | 0.024   |
| [MoP] C-Stem Cemented Stem Charnley and Elite Plus LPW     | 384            | 1.43                   | 0.88                      | [-0.30 , 2.06] | Non-inferiority not shown | 0.145   |
| [MoP] C-Stem Cemented Stem Elite Plus Ogee                 | 808            | 0.43                   | -0.12                     | [-0.65 , 0.42] | Non-inferiority not shown | 0.672   |
| [MoP] C-Stem Cemented Stem Marathon                        | 333            | 0.58                   | 0.03                      | [-0.63 , 0.69] | Non-inferiority not shown | 0.928   |
| [MoP] C-Stem Cemented Stem Opera                           | 270            | 0.34                   | -0.21                     | [-0.95 , 0.52] | Non-inferiority not shown | 0.568   |
| [MoP] CCA Cemented Stem CCB Cup                            | 329            | 1.00                   | 0.45                      | [-0.59 , 1.49] | Non-inferiority not shown | 0.394   |
| [MoP] CPCS Opera                                           | 309            | 0.61                   | 0.06                      | [-0.84 , 0.95] | Non-inferiority not shown | 0.904   |
| [MoP] CPT Elite Plus Ogee                                  | 585            | 1.11                   | 0.56                      | [-0.27 , 1.40] | Non-inferiority not shown | 0.186   |
| [MoP] CPT Original ME Muller Low Profile Cup               | 272            | 1.78                   | 1.23                      | [-0.25 , 2.70] | Non-inferiority not shown | 0.104   |
| [MoP] CPT Trabecular Metal Modular Cementless Cup          | 306            | 0.92                   | 0.37                      | [-0.60 , 1.34] | Non-inferiority not shown | 0.451   |
| [MoP] CPT Trilogy                                          | 2,024          | 1.12                   | 0.57                      | [ 0.07 , 1.08] | Non-inferiority not shown | 0.027   |
| [MoP] CPT ZCA                                              | 3,039          | 1.37                   | 0.82                      | [ 0.34 , 1.30] | Inferior by $\geq 20\%$   | 0.001   |
| [MoP] Charnley Cemented Stem Charnley Cemented Cup         | 926            | 0.92                   | 0.37                      | [-0.31 , 1.05] | Non-inferiority not shown | 0.289   |
| [MoP] Charnley Cemented Stem Charnley Ogee                 | 2,041          | 0.79                   | 0.24                      | [-0.25 , 0.72] | Non-inferiority not shown | 0.344   |
| [MoP] Charnley Cemented Stem Opera                         | 306            | 0.93                   | 0.38                      | [-0.72 , 1.49] | Non-inferiority not shown | 0.494   |
| [MoP] Charnley Cemented Stem Wroblewski Golf Ball          | 275            | 1.66                   | 1.11                      | [-0.37 , 2.59] | Non-inferiority not shown | 0.142   |
| [MoP] Corail Duraloc Cementless Cup                        | 535            | 0.68                   | 0.13                      | [-0.61 , 0.87] | Non-inferiority not shown | 0.727   |
| [MoP] Corail Elite Plus Cemented Cup                       | 272            | 0.65                   | 0.10                      | [-0.86 , 1.06] | Non-inferiority not shown | 0.841   |
| [MoP] Corail Elite Plus Ogee                               | 376            | 1.19                   | 0.64                      | [-0.36 , 1.64] | Non-inferiority not shown | 0.211   |
| [MoP] Corail Marathon                                      | 690            | 0.92                   | 0.37                      | [-0.28 , 1.01] | Non-inferiority not shown | 0.264   |
| [MoP] Corail Pinnacle                                      | 4,912          | 1.43                   | 0.88                      | [ 0.46 , 1.30] | Inferior by $\geq 20\%$   | <0.001  |
| [MoP] Corail Trilogy                                       | 336            | 0.77                   | 0.22                      | [-0.71 , 1.15] | Non-inferiority not shown | 0.642   |
| [MoP] Exeter V40 Cenator Cemented Cup                      | 694            | 0.99                   | 0.44                      | [-0.32 , 1.20] | Non-inferiority not shown | 0.256   |
| [MoP] Exeter V40 Charnley Ogee                             | 321            | 0.59                   | 0.04                      | [-0.84 , 0.92] | Non-inferiority not shown | 0.930   |
| [MoP] Exeter V40 Charnley and Elite Plus LPW               | 847            | 1.31                   | 0.76                      | [-0.02 , 1.54] | Non-inferiority not shown | 0.057   |
| [MoP] Exeter V40 Elite Plus Cemented Cup                   | 906            | 0.42                   | -0.14                     | [-0.62 , 0.35] | Non-inferiority not shown | 0.587   |
| [MoP] Exeter V40 Elite Plus Ogee                           | 5,144          | 0.61                   | 0.06                      | [-0.32 , 0.43] | Non-inferiority not shown | 0.772   |

|                                                               |        |      |       |                |                           |        |
|---------------------------------------------------------------|--------|------|-------|----------------|---------------------------|--------|
| [MoP] Exeter V40 Exeter Contemporary Flanged                  | 12,084 | 0.59 | 0.04  | [-0.31 , 0.39] | Non-inferiority not shown | 0.821  |
| [MoP] Exeter V40 Exeter Contemporary Hooded                   | 5,022  | 1.11 | 0.56  | [ 0.15 , 0.97] | Inferior by $\geq 20\%$   | 0.007  |
| [MoP] Exeter V40 Exeter Duration                              | 3,745  | 0.79 | 0.24  | [-0.18 , 0.65] | Non-inferiority not shown | 0.265  |
| [MoP] Exeter V40 Exeter X3 Rimfit                             | 1,286  | 0.68 | 0.13  | [-0.31 , 0.57] | Non-inferiority not shown | 0.567  |
| [MoP] Exeter V40 Marathon                                     | 365    | 0.95 | 0.40  | [-0.38 , 1.18] | Non-inferiority not shown | 0.319  |
| [MoP] Exeter V40 Opera                                        | 732    | 0.48 | -0.07 | [-0.64 , 0.50] | Non-inferiority not shown | 0.815  |
| [MoP] Exeter V40 Pinnacle                                     | 736    | 0.83 | 0.28  | [-0.31 , 0.87] | Non-inferiority not shown | 0.358  |
| [MoP] Exeter V40 Reflection Cementless                        | 494    | 0.75 | 0.20  | [-0.60 , 1.00] | Non-inferiority not shown | 0.623  |
| [MoP] Exeter V40 Trident                                      | 4,508  | 0.77 | 0.22  | [-0.16 , 0.60] | Non-inferiority not shown | 0.261  |
| [MoP] Exeter V40 Trilogy                                      | 1,511  | 0.87 | 0.32  | [-0.21 , 0.86] | Non-inferiority not shown | 0.240  |
| [MoP] Exeter V40 Ultima Cemented Cup                          | 337    | 0.82 | 0.27  | [-0.71 , 1.25] | Non-inferiority not shown | 0.591  |
| [MoP] Furlong Cemented Stem JRI Cemented Cup                  | 531    | 0.88 | 0.33  | [-0.51 , 1.16] | Non-inferiority not shown | 0.442  |
| [MoP] Furlong HAC Stem CSF                                    | 1,553  | 2.48 | 1.93  | [ 1.15 , 2.70] | Inferior by $\geq 100\%$  | <0.001 |
| [MoP] Furlong HAC Stem Furlong HAC CSF Plus                   | 792    | 2.58 | 2.03  | [ 1.08 , 2.97] | Inferior by $\geq 100\%$  | <0.001 |
| [MoP] MS-30 Original ME Muller Low Profile Cup                | 401    | 0.36 | -0.20 | [-0.78 , 0.39] | Non-inferiority not shown | 0.516  |
| [MoP] Muller Straight Stem Original ME Muller Low Profile Cup | 461    | 0.78 | 0.23  | [-0.53 , 0.99] | Non-inferiority not shown | 0.550  |
| [MoP] Muller-Biomet Apollo                                    | 551    | 0.66 | 0.11  | [-0.61 , 0.83] | Non-inferiority not shown | 0.763  |
| [MoP] Muller-Biomet Original ME Muller Low Profile Cup        | 342    | 1.08 | 0.53  | [-0.57 , 1.63] | Non-inferiority not shown | 0.346  |
| [MoP] Omnifit Cemented Stem ODC                               | 253    | 1.47 | 0.92  | [-0.55 , 2.39] | Non-inferiority not shown | 0.218  |
| [MoP] SL-Plus Cementless Stem EP-Fit Plus                     | 290    | 0.71 | 0.16  | [-0.70 , 1.02] | Non-inferiority not shown | 0.720  |
| [MoP] Stanmore Modular Stem SHP Cup                           | 367    | 0.64 | 0.09  | [-0.70 , 0.89] | Non-inferiority not shown | 0.819  |
| [MoP] Stanmore Modular Stem Stanmore-Arcom Cup                | 1,325  | 0.86 | 0.31  | [-0.26 , 0.87] | Non-inferiority not shown | 0.289  |
| [MoP] Taperloc Cementless Stem Exceed ABT                     | 733    | 1.73 | 1.18  | [ 0.37 , 1.99] | Inferior by $\geq 20\%$   | 0.004  |

**Supplemental table 5b: Difference in Kaplan-Meier failure estimate between a contemporary reference and implants with at least 250 at risk at 5 years since primary in females >75 years**

| Stem/cup brand                                                | Number at risk | Cumulative failure (%) | Difference in failure (%) | 95% CI         | Equivalence status        | p-value |
|---------------------------------------------------------------|----------------|------------------------|---------------------------|----------------|---------------------------|---------|
| [MoP] Charnley Cemented Stem Charnley and Elite Plus LPW      | 1,515          | 0.73                   | [REFERENCE]               |                |                           |         |
| [CoC] Corail Pinnacle                                         | 454            | 2.22                   | 1.49                      | [ 0.47 , 2.50] | Inferior by $\geq 20\%$   | 0.004   |
| [CoC] Furlong HAC Stem Furlong HAC CSF Plus                   | 302            | 1.22                   | 0.49                      | [-0.55 , 1.53] | Non-inferiority not shown | 0.352   |
| [CoP] Furlong HAC Stem CSF                                    | 539            | 1.56                   | 0.83                      | [-0.13 , 1.80] | Non-inferiority not shown | 0.089   |
| [MoP] Accolade Trident                                        | 1,066          | 2.01                   | 1.28                      | [ 0.53 , 2.03] | Inferior by $\geq 20\%$   | 0.001   |
| [MoP] C-Stem AMT Cemented Stem Charnley and Elite Plus LPW    | 388            | 1.25                   | 0.52                      | [-0.34 , 1.39] | Non-inferiority not shown | 0.236   |
| [MoP] C-Stem AMT Cemented Stem Elite Plus Ogee                | 345            | 0.88                   | 0.15                      | [-0.57 , 0.88] | Non-inferiority not shown | 0.682   |
| [MoP] C-Stem Cemented Stem Charnley and Elite Plus LPW        | 328            | 1.73                   | 1.00                      | [-0.33 , 2.33] | Non-inferiority not shown | 0.141   |
| [MoP] C-Stem Cemented Stem Elite Plus Ogee                    | 614            | 0.57                   | -0.16                     | [-0.79 , 0.47] | Non-inferiority not shown | 0.615   |
| [MoP] CPT Elite Plus Ogee                                     | 388            | 1.49                   | 0.76                      | [-0.24 , 1.77] | Non-inferiority not shown | 0.136   |
| [MoP] CPT Trilogy                                             | 1,273          | 1.88                   | 1.15                      | [ 0.47 , 1.83] | Inferior by $\geq 20\%$   | 0.001   |
| [MoP] CPT ZCA                                                 | 2,186          | 1.86                   | 1.13                      | [ 0.55 , 1.71] | Inferior by $\geq 20\%$   | <0.001  |
| [MoP] Charnley Cemented Stem Charnley Cemented Cup            | 780            | 1.27                   | 0.54                      | [-0.27 , 1.36] | Non-inferiority not shown | 0.190   |
| [MoP] Charnley Cemented Stem Charnley Ogee                    | 1,658          | 1.15                   | 0.42                      | [-0.17 , 1.01] | Non-inferiority not shown | 0.162   |
| [MoP] Corail Duraloc Cementless Cup                           | 479            | 1.66                   | 0.93                      | [-0.21 , 2.07] | Non-inferiority not shown | 0.111   |
| [MoP] Corail Marathon                                         | 325            | 0.92                   | 0.19                      | [-0.49 , 0.86] | Non-inferiority not shown | 0.585   |
| [MoP] Corail Pinnacle                                         | 2,638          | 1.78                   | 1.05                      | [ 0.55 , 1.55] | Inferior by $\geq 20\%$   | <0.001  |
| [MoP] Corail Trilogy                                          | 261            | 1.11                   | 0.39                      | [-0.78 , 1.55] | Non-inferiority not shown | 0.515   |
| [MoP] Exeter V40 Cenator Cemented Cup                         | 533            | 1.32                   | 0.59                      | [-0.31 , 1.49] | Non-inferiority not shown | 0.201   |
| [MoP] Exeter V40 Charnley Ogee                                | 264            | 1.27                   | 0.54                      | [-0.76 , 1.85] | Non-inferiority not shown | 0.414   |
| [MoP] Exeter V40 Charnley and Elite Plus LPW                  | 575            | 1.31                   | 0.58                      | [-0.23 , 1.39] | Non-inferiority not shown | 0.159   |
| [MoP] Exeter V40 Elite Plus Cemented Cup                      | 653            | 0.53                   | -0.20                     | [-0.77 , 0.38] | Non-inferiority not shown | 0.502   |
| [MoP] Exeter V40 Elite Plus Ogee                              | 3,667          | 0.84                   | 0.11                      | [-0.34 , 0.56] | Non-inferiority not shown | 0.644   |
| [MoP] Exeter V40 Exeter Contemporary Flanged                  | 7,444          | 0.86                   | 0.13                      | [-0.28 , 0.55] | Non-inferiority not shown | 0.524   |
| [MoP] Exeter V40 Exeter Contemporary Hooded                   | 3,318          | 1.47                   | 0.74                      | [ 0.24 , 1.23] | Inferior by $\geq 20\%$   | 0.003   |
| [MoP] Exeter V40 Exeter Duration                              | 2,928          | 1.18                   | 0.46                      | [-0.05 , 0.96] | Non-inferiority not shown | 0.078   |
| [MoP] Exeter V40 Opera                                        | 530            | 0.63                   | -0.10                     | [-0.77 , 0.57] | Non-inferiority not shown | 0.768   |
| [MoP] Exeter V40 Pinnacle                                     | 386            | 1.03                   | 0.30                      | [-0.44 , 1.04] | Non-inferiority not shown | 0.422   |
| [MoP] Exeter V40 Reflection Cementless                        | 402            | 0.96                   | 0.23                      | [-0.69 , 1.16] | Non-inferiority not shown | 0.620   |
| [MoP] Exeter V40 Trident                                      | 2,517          | 1.05                   | 0.32                      | [-0.15 , 0.79] | Non-inferiority not shown | 0.179   |
| [MoP] Exeter V40 Trilogy                                      | 1,080          | 1.32                   | 0.59                      | [-0.08 , 1.27] | Non-inferiority not shown | 0.085   |
| [MoP] Exeter V40 Ultima Cemented Cup                          | 300            | 1.15                   | 0.42                      | [-0.77 , 1.61] | Non-inferiority not shown | 0.488   |
| [MoP] Furlong Cemented Stem JRI Cemented Cup                  | 426            | 0.88                   | 0.15                      | [-0.71 , 1.00] | Non-inferiority not shown | 0.734   |
| [MoP] Furlong HAC Stem CSF                                    | 1,201          | 3.07                   | 2.34                      | [ 1.44 , 3.24] | Inferior by $\geq 100\%$  | <0.001  |
| [MoP] Furlong HAC Stem Furlong HAC CSF Plus                   | 481            | 2.71                   | 1.98                      | [ 0.98 , 2.98] | Inferior by $\geq 100\%$  | <0.001  |
| [MoP] MS-30 Original ME Muller Low Profile Cup                | 259            | 1.30                   | 0.57                      | [-0.67 , 1.81] | Non-inferiority not shown | 0.366   |
| [MoP] Muller Straight Stem Original ME Muller Low Profile Cup | 319            | 1.04                   | 0.31                      | [-0.62 , 1.25] | Non-inferiority not shown | 0.514   |
| [MoP] Muller-Biomet Apollo                                    | 422            | 0.86                   | 0.13                      | [-0.71 , 0.98] | Non-inferiority not shown | 0.759   |
| [MoP] Stanmore Modular Stem Stanmore-Arcom Cup                | 979            | 1.12                   | 0.39                      | [-0.28 , 1.06] | Non-inferiority not shown | 0.253   |

[MoP] Taperloc Cementless Stem Exceed ABT

337

1.95

1.22 [ 0.29 , 2.15]

Inferior by  $\geq 20\%$

0.010

---

**Supplemental table 5c: Difference in Kaplan-Meier failure estimate between a contemporary reference and implants with at least 250 at risk at 7 years since primary in females >75 years**

| Stem/cup brand                                           | Number at risk | Cumulative failure (%) | Difference in failure (%) | 95% CI         | Equivalence status        | p-value |
|----------------------------------------------------------|----------------|------------------------|---------------------------|----------------|---------------------------|---------|
| [MoP] Charnley Cemented Stem Charnley and Elite Plus LPW | 1,119          | 0.88                   | [REFERENCE]               |                |                           |         |
| [CoP] Furlong HAC Stem CSF                               | 391            | 2.04                   | 1.16                      | [-0.02 , 2.34] | Non-inferiority not shown | 0.055   |
| [MoP] Accolade Trident                                   | 460            | 2.40                   | 1.52                      | [ 0.61 , 2.42] | Inferior by $\geq 20\%$   | 0.001   |
| [MoP] C-Stem Cemented Stem Charnley and Elite Plus LPW   | 292            | 1.73                   | 0.85                      | [-0.50 , 2.19] | Non-inferiority not shown | 0.218   |
| [MoP] C-Stem Cemented Stem Elite Plus Ogee               | 444            | 0.57                   | -0.31                     | [-0.98 , 0.35] | Non-inferiority not shown | 0.354   |
| [MoP] CPT Trilogy                                        | 689            | 2.22                   | 1.34                      | [ 0.53 , 2.16] | Inferior by $\geq 20\%$   | 0.001   |
| [MoP] CPT ZCA                                            | 1,341          | 2.44                   | 1.56                      | [ 0.85 , 2.27] | Inferior by $\geq 20\%$   | <0.001  |
| [MoP] Charnley Cemented Stem Charnley Cemented Cup       | 605            | 1.72                   | 0.84                      | [-0.14 , 1.81] | Non-inferiority not shown | 0.093   |
| [MoP] Charnley Cemented Stem Charnley Ogee               | 1,236          | 1.35                   | 0.47                      | [-0.20 , 1.13] | Non-inferiority not shown | 0.167   |
| [MoP] Corail Duraloc Cementless Cup                      | 363            | 2.36                   | 1.48                      | [ 0.08 , 2.88] | Non-inferiority not shown | 0.039   |
| [MoP] Corail Pinnacle                                    | 1,150          | 2.17                   | 1.28                      | [ 0.67 , 1.90] | Inferior by $\geq 20\%$   | <0.001  |
| [MoP] Exeter V40 Cenator Cemented Cup                    | 373            | 1.32                   | 0.44                      | [-0.49 , 1.37] | Non-inferiority not shown | 0.355   |
| [MoP] Exeter V40 Charnley and Elite Plus LPW             | 309            | 1.31                   | 0.43                      | [-0.41 , 1.26] | Non-inferiority not shown | 0.313   |
| [MoP] Exeter V40 Elite Plus Cemented Cup                 | 429            | 0.95                   | 0.07                      | [-0.77 , 0.90] | Non-inferiority not shown | 0.879   |
| [MoP] Exeter V40 Elite Plus Ogee                         | 2,329          | 1.18                   | 0.30                      | [-0.24 , 0.83] | Non-inferiority not shown | 0.283   |
| [MoP] Exeter V40 Exeter Contemporary Flanged             | 4,187          | 1.13                   | 0.24                      | [-0.24 , 0.73] | Non-inferiority not shown | 0.320   |
| [MoP] Exeter V40 Exeter Contemporary Hooded              | 1,866          | 2.16                   | 1.28                      | [ 0.66 , 1.90] | Inferior by $\geq 20\%$   | <0.001  |
| [MoP] Exeter V40 Exeter Duration                         | 1,961          | 1.66                   | 0.78                      | [ 0.17 , 1.39] | Non-inferiority not shown | 0.012   |
| [MoP] Exeter V40 Opera                                   | 317            | 0.85                   | -0.03                     | [-0.86 , 0.80] | Non-inferiority not shown | 0.950   |
| [MoP] Exeter V40 Reflection Cementless                   | 258            | 1.34                   | 0.46                      | [-0.74 , 1.66] | Non-inferiority not shown | 0.452   |
| [MoP] Exeter V40 Trident                                 | 1,221          | 1.27                   | 0.39                      | [-0.17 , 0.95] | Non-inferiority not shown | 0.168   |
| [MoP] Exeter V40 Trilogy                                 | 618            | 1.41                   | 0.53                      | [-0.20 , 1.26] | Non-inferiority not shown | 0.151   |
| [MoP] Furlong Cemented Stem JRI Cemented Cup             | 307            | 1.11                   | 0.23                      | [-0.76 , 1.22] | Non-inferiority not shown | 0.649   |
| [MoP] Furlong HAC Stem CSF                               | 882            | 3.51                   | 2.63                      | [ 1.63 , 3.63] | Inferior by $\geq 100\%$  | <0.001  |
| [MoP] Muller-Biomet Apollo                               | 288            | 0.86                   | -0.02                     | [-0.89 , 0.85] | Non-inferiority not shown | 0.965   |
| [MoP] Stanmore Modular Stem Stanmore-Arcom Cup           | 575            | 1.36                   | 0.48                      | [-0.29 , 1.26] | Non-inferiority not shown | 0.223   |

**Supplemental table 6a: Difference in Kaplan-Meier failure estimate between a contemporary reference and implants with at least 250 at risk at 3 years since primary in males**

| Stem/cup brand                                                | Number at risk | Cumulative failure (%) | Difference in failure (%) | 95% CI         | Equivalence status        | p-value |
|---------------------------------------------------------------|----------------|------------------------|---------------------------|----------------|---------------------------|---------|
| [CoP] Exeter V40 Exeter Contemporary Flanged                  | 1,147          | 0.76                   | [REFERENCE]               |                |                           |         |
| [CoC] ABG II Monolithic Cementless Stem ABG II Cementless Cup | 560            | 2.22                   | 1.46                      | [ 0.19 , 2.73] | Inferior by $\geq 20\%$   | 0.024   |
| [CoC] ABG II Monolithic Cementless Stem Trident               | 544            | 1.76                   | 1.00                      | [-0.16 , 2.17] | Non-inferiority not shown | 0.091   |
| [CoC] Accolade Trident                                        | 3,001          | 2.33                   | 1.57                      | [ 0.90 , 2.25] | Inferior by $\geq 100\%$  | <0.001  |
| [CoC] Bimetric Cementless Stem Exceed ABT                     | 377            | 0.89                   | 0.14                      | [-0.84 , 1.11] | Non-inferiority not shown | 0.784   |
| [CoC] C-Stem AMT Cemented Stem Pinnacle                       | 284            | 0.43                   | -0.33                     | [-1.06 , 0.40] | Non-inferiority not shown | 0.380   |
| [CoC] CPT Continuum                                           | 321            | 2.54                   | 1.78                      | [ 0.30 , 3.27] | Inferior by $\geq 20\%$   | 0.019   |
| [CoC] Corail Delta TT                                         | 274            | 2.45                   | 1.69                      | [ 0.11 , 3.27] | Non-inferiority not shown | 0.036   |
| [CoC] Corail DeltaMotion                                      | 452            | 1.67                   | 0.91                      | [-0.25 , 2.08] | Non-inferiority not shown | 0.125   |
| [CoC] Corail Duraloc Option                                   | 463            | 2.29                   | 1.53                      | [ 0.13 , 2.94] | Non-inferiority not shown | 0.033   |
| [CoC] Corail Pinnacle                                         | 12,616         | 1.92                   | 1.16                      | [ 0.68 , 1.64] | Inferior by $\geq 20\%$   | <0.001  |
| [CoC] Excia Cementless Plasmacap SC                           | 419            | 0.85                   | 0.09                      | [-0.77 , 0.95] | Non-inferiority not shown | 0.832   |
| [CoC] Exeter V40 ABG II Cementless Cup                        | 457            | 1.13                   | 0.38                      | [-0.62 , 1.38] | Non-inferiority not shown | 0.460   |
| [CoC] Exeter V40 Trident                                      | 4,326          | 1.13                   | 0.37                      | [-0.15 , 0.89] | Non-inferiority not shown | 0.158   |
| [CoC] Furlong Evolution Cementless Furlong HAC CSF Plus       | 275            | 2.00                   | 1.24                      | [ 0.12 , 2.36] | Non-inferiority not shown | 0.030   |
| [CoC] Furlong HAC Stem CSF                                    | 688            | 2.76                   | 2.00                      | [ 0.73 , 3.27] | Inferior by $\geq 20\%$   | 0.002   |
| [CoC] Furlong HAC Stem Furlong HAC CSF Plus                   | 4,023          | 1.72                   | 0.96                      | [ 0.41 , 1.51] | Inferior by $\geq 20\%$   | 0.001   |
| [CoC] M/L Taper Cementless Continuum                          | 704            | 1.73                   | 0.97                      | [ 0.05 , 1.90] | Non-inferiority not shown | 0.040   |
| [CoC] Metafix Stem Trinity                                    | 344            | 1.09                   | 0.33                      | [-0.59 , 1.26] | Non-inferiority not shown | 0.479   |
| [CoC] Polarstem Cementless R3 Cementless                      | 341            | 0.37                   | -0.39                     | [-1.06 , 0.27] | Non-inferiority not shown | 0.248   |
| [CoC] SL-Plus Cementless Stem EP-Fit Plus                     | 601            | 5.11                   | 4.36                      | [ 2.60 , 6.11] | Inferior by $\geq 100\%$  | <0.001  |
| [CoC] SL-Plus Cementless Stem R3 Cementless                   | 298            | 1.48                   | 0.72                      | [-0.64 , 2.08] | Non-inferiority not shown | 0.298   |
| [CoC] SPS Modular April - Ceramic                             | 291            | 0.59                   | -0.17                     | [-1.09 , 0.75] | Non-inferiority not shown | 0.722   |
| [CoC] Taperloc Cementless Stem Exceed ABT                     | 2,976          | 1.64                   | 0.88                      | [ 0.30 , 1.46] | Inferior by $\geq 20\%$   | 0.003   |
| [CoC] miniHip Trinity                                         | 273            | 3.21                   | 2.46                      | [ 0.68 , 4.24] | Inferior by $\geq 20\%$   | 0.007   |
| [CoP] Accolade Trident                                        | 1,319          | 1.66                   | 0.91                      | [ 0.21 , 1.60] | Inferior by $\geq 20\%$   | 0.011   |
| [CoP] C-Stem Cemented Stem Elite Plus Ogee                    | 265            | 0.93                   | 0.17                      | [-0.96 , 1.30] | Non-inferiority not shown | 0.771   |
| [CoP] C-Stem Cemented Stem Marathon                           | 526            | 1.07                   | 0.31                      | [-0.49 , 1.11] | Non-inferiority not shown | 0.447   |
| [CoP] C-Stem Cemented Stem Opera                              | 341            | 1.15                   | 0.39                      | [-0.81 , 1.60] | Non-inferiority not shown | 0.520   |
| [CoP] C-Stem Cemented Stem Wroblewski Golf Ball               | 396            | 0.90                   | 0.14                      | [-0.84 , 1.12] | Non-inferiority not shown | 0.779   |
| [CoP] CPT Trilogy                                             | 450            | 1.91                   | 1.15                      | [ 0.24 , 2.05] | Inferior by $\geq 20\%$   | 0.013   |
| [CoP] Corail Charnley and Elite Plus LPW                      | 252            | 1.10                   | 0.35                      | [-0.97 , 1.66] | Non-inferiority not shown | 0.606   |
| [CoP] Corail Marathon                                         | 525            | 1.69                   | 0.93                      | [-0.02 , 1.89] | Non-inferiority not shown | 0.055   |
| [CoP] Corail Pinnacle                                         | 3,493          | 1.14                   | 0.38                      | [-0.11 , 0.88] | Non-inferiority not shown | 0.131   |
| [CoP] Exeter V40 Charnley and Elite Plus LPW                  | 300            | 1.07                   | 0.31                      | [-0.82 , 1.44] | Non-inferiority not shown | 0.593   |
| [CoP] Exeter V40 Elite Plus Ogee                              | 536            | 0.86                   | 0.10                      | [-0.71 , 0.92] | Non-inferiority not shown | 0.803   |
| [CoP] Exeter V40 Exeter Contemporary Hooded                   | 298            | 2.35                   | 1.59                      | [-0.00 , 3.18] | Non-inferiority not shown | 0.050   |
| [CoP] Exeter V40 Exeter Duration                              | 300            | 0.27                   | -0.49                     | [-1.17 , 0.18] | Non-inferiority not shown | 0.152   |
| [CoP] Exeter V40 Exeter X3 Rimfit                             | 911            | 1.32                   | 0.56                      | [-0.15 , 1.27] | Non-inferiority not shown | 0.120   |
| [CoP] Exeter V40 Pinnacle                                     | 251            | 1.17                   | 0.41                      | [-0.58 , 1.40] | Non-inferiority not shown | 0.418   |

|                                                            |        |      |       |                |                           |        |
|------------------------------------------------------------|--------|------|-------|----------------|---------------------------|--------|
| [CoP] Exeter V40 Trident                                   | 1,917  | 0.79 | 0.04  | [-0.47 , 0.55] | Non-inferiority not shown | 0.887  |
| [CoP] Exeter V40 Trilogy                                   | 764    | 1.73 | 0.97  | [ 0.00 , 1.94] | Non-inferiority not shown | 0.050  |
| [CoP] Furlong HAC Stem CSF                                 | 2,536  | 1.18 | 0.42  | [-0.17 , 1.01] | Non-inferiority not shown | 0.162  |
| [CoP] Furlong HAC Stem Furlong HAC CSF Plus                | 699    | 1.22 | 0.46  | [-0.33 , 1.26] | Non-inferiority not shown | 0.250  |
| [CoP] MS-30 Original ME Muller Low Profile Cup             | 459    | 0.35 | -0.41 | [-1.06 , 0.24] | Non-inferiority not shown | 0.217  |
| [CoP] SL-Plus Cementless Stem Bicon-Plus                   | 279    | 3.64 | 2.88  | [ 0.73 , 5.04] | Inferior by $\geq 20\%$   | 0.009  |
| [CoP] SL-Plus Cementless Stem EP-Fit Plus                  | 366    | 1.82 | 1.06  | [-0.34 , 2.47] | Non-inferiority not shown | 0.138  |
| [CoP] Taperloc Cementless Stem Exceed ABT                  | 821    | 1.17 | 0.41  | [-0.27 , 1.09] | Non-inferiority not shown | 0.240  |
| [MoP] Accolade Trident                                     | 3,597  | 2.40 | 1.65  | [ 1.02 , 2.27] | Inferior by $\geq 100\%$  | <0.001 |
| [MoP] Anthology R3 Cementless                              | 427    | 2.22 | 1.46  | [ 0.36 , 2.56] | Inferior by $\geq 20\%$   | 0.009  |
| [MoP] C-Stem AMT Cemented Stem Charnley and Elite Plus LPW | 717    | 1.65 | 0.89  | [-0.07 , 1.85] | Non-inferiority not shown | 0.070  |
| [MoP] C-Stem AMT Cemented Stem Elite Plus Ogee             | 473    | 0.61 | -0.15 | [-0.89 , 0.59] | Non-inferiority not shown | 0.690  |
| [MoP] C-Stem AMT Cemented Stem Marathon                    | 406    | 1.04 | 0.28  | [-0.47 , 1.03] | Non-inferiority not shown | 0.461  |
| [MoP] C-Stem AMT Cemented Stem Pinnacle                    | 495    | 1.18 | 0.42  | [-0.37 , 1.22] | Non-inferiority not shown | 0.296  |
| [MoP] C-Stem Cemented Stem Charnley Ogee                   | 251    | 0.91 | 0.15  | [-0.96 , 1.26] | Non-inferiority not shown | 0.794  |
| [MoP] C-Stem Cemented Stem Charnley and Elite Plus LPW     | 476    | 0.79 | 0.03  | [-0.85 , 0.92] | Non-inferiority not shown | 0.942  |
| [MoP] C-Stem Cemented Stem Elite Plus Cemented Cup         | 261    | 0.70 | -0.06 | [-1.12 , 1.00] | Non-inferiority not shown | 0.918  |
| [MoP] C-Stem Cemented Stem Elite Plus Ogee                 | 1,224  | 1.18 | 0.42  | [-0.29 , 1.12] | Non-inferiority not shown | 0.243  |
| [MoP] C-Stem Cemented Stem Marathon                        | 597    | 1.40 | 0.65  | [-0.25 , 1.54] | Non-inferiority not shown | 0.155  |
| [MoP] C-Stem Cemented Stem Opera                           | 528    | 1.62 | 0.86  | [-0.27 , 2.00] | Non-inferiority not shown | 0.137  |
| [MoP] C-Stem Cemented Stem Wroblewski Golf Ball            | 354    | 1.29 | 0.53  | [-0.67 , 1.73] | Non-inferiority not shown | 0.388  |
| [MoP] CCA Cemented Stem CCB Cup                            | 337    | 0.47 | -0.28 | [-1.07 , 0.50] | Non-inferiority not shown | 0.480  |
| [MoP] CLS Cementless Stem Allofit                          | 265    | 3.32 | 2.56  | [ 0.49 , 4.63] | Inferior by $\geq 20\%$   | 0.015  |
| [MoP] CPCS Opera                                           | 371    | 0.51 | -0.24 | [-1.07 , 0.59] | Non-inferiority not shown | 0.567  |
| [MoP] CPT Elite Plus Ogee                                  | 862    | 1.64 | 0.88  | [-0.02 , 1.79] | Non-inferiority not shown | 0.056  |
| [MoP] CPT Trilogy                                          | 2,750  | 1.70 | 0.95  | [ 0.35 , 1.54] | Inferior by $\geq 20\%$   | 0.002  |
| [MoP] CPT ZCA                                              | 2,153  | 1.52 | 0.76  | [ 0.15 , 1.37] | Non-inferiority not shown | 0.015  |
| [MoP] Charnley Cemented Stem Charnley Cemented Cup         | 1,527  | 1.34 | 0.58  | [-0.12 , 1.28] | Non-inferiority not shown | 0.107  |
| [MoP] Charnley Cemented Stem Charnley Ogee                 | 3,293  | 1.35 | 0.59  | [ 0.02 , 1.16] | Non-inferiority not shown | 0.043  |
| [MoP] Charnley Cemented Stem Charnley and Elite Plus LPW   | 1,647  | 0.97 | 0.22  | [-0.41 , 0.84] | Non-inferiority not shown | 0.496  |
| [MoP] Charnley Cemented Stem Opera                         | 407    | 1.15 | 0.39  | [-0.70 , 1.49] | Non-inferiority not shown | 0.479  |
| [MoP] Charnley Cemented Stem Wroblewski Golf Ball          | 382    | 1.45 | 0.69  | [-0.54 , 1.92] | Non-inferiority not shown | 0.270  |
| [MoP] Corail Duraloc Cementless Cup                        | 1,310  | 1.59 | 0.83  | [ 0.05 , 1.62] | Non-inferiority not shown | 0.038  |
| [MoP] Corail Elite Plus Cemented Cup                       | 337    | 1.52 | 0.76  | [-0.52 , 2.04] | Non-inferiority not shown | 0.245  |
| [MoP] Corail Elite Plus Ogee                               | 471    | 1.51 | 0.75  | [-0.32 , 1.82] | Non-inferiority not shown | 0.171  |
| [MoP] Corail Marathon                                      | 978    | 1.50 | 0.74  | [-0.00 , 1.48] | Non-inferiority not shown | 0.050  |
| [MoP] Corail Pinnacle                                      | 11,121 | 1.53 | 0.78  | [ 0.31 , 1.25] | Inferior by $\geq 20\%$   | 0.001  |
| [MoP] Corail Trilogy                                       | 726    | 1.48 | 0.72  | [-0.21 , 1.66] | Non-inferiority not shown | 0.131  |
| [MoP] Exeter V40 ABG II Cementless Cup                     | 258    | 2.15 | 1.39  | [-0.36 , 3.15] | Non-inferiority not shown | 0.120  |
| [MoP] Exeter V40 Cenator Cemented Cup                      | 705    | 1.30 | 0.55  | [-0.37 , 1.46] | Non-inferiority not shown | 0.240  |
| [MoP] Exeter V40 Charnley and Elite Plus LPW               | 667    | 1.09 | 0.33  | [-0.50 , 1.16] | Non-inferiority not shown | 0.437  |
| [MoP] Exeter V40 Duraloc Cementless Cup                    | 355    | 2.15 | 1.40  | [-0.14 , 2.93] | Non-inferiority not shown | 0.075  |
| [MoP] Exeter V40 Elite Plus Cemented Cup                   | 1,212  | 0.84 | 0.08  | [-0.56 , 0.72] | Non-inferiority not shown | 0.809  |
| [MoP] Exeter V40 Elite Plus Ogee                           | 5,579  | 0.96 | 0.21  | [-0.29 , 0.70] | Non-inferiority not shown | 0.413  |
| [MoP] Exeter V40 Exeter Contemporary Flanged               | 13,647 | 1.12 | 0.36  | [-0.09 , 0.82] | Non-inferiority not shown | 0.118  |
| [MoP] Exeter V40 Exeter Contemporary Hooded                | 5,115  | 1.83 | 1.07  | [ 0.53 , 1.60] | Inferior by $\geq 20\%$   | <0.001 |

|                                                               |       |      |       |                |                           |        |
|---------------------------------------------------------------|-------|------|-------|----------------|---------------------------|--------|
| [MoP] Exeter V40 Exeter Duration                              | 4,042 | 1.60 | 0.85  | [ 0.29 , 1.41] | Inferior by $\geq 20\%$   | 0.003  |
| [MoP] Exeter V40 Exeter X3 Rimfit                             | 1,854 | 1.41 | 0.65  | [ 0.06 , 1.24] | Non-inferiority not shown | 0.031  |
| [MoP] Exeter V40 Marathon                                     | 418   | 1.41 | 0.65  | [-0.32 , 1.61] | Non-inferiority not shown | 0.188  |
| [MoP] Exeter V40 Opera                                        | 714   | 1.04 | 0.28  | [-0.56 , 1.11] | Non-inferiority not shown | 0.514  |
| [MoP] Exeter V40 Pinnacle                                     | 784   | 1.67 | 0.91  | [ 0.08 , 1.75] | Non-inferiority not shown | 0.033  |
| [MoP] Exeter V40 Reflection Cementless                        | 729   | 1.79 | 1.04  | [ 0.01 , 2.06] | Non-inferiority not shown | 0.048  |
| [MoP] Exeter V40 Trident                                      | 6,504 | 1.31 | 0.55  | [ 0.07 , 1.04] | Non-inferiority not shown | 0.025  |
| [MoP] Exeter V40 Trilogy                                      | 3,337 | 1.06 | 0.31  | [-0.23 , 0.85] | Non-inferiority not shown | 0.265  |
| [MoP] Exeter V40 Ultima Cemented Cup                          | 363   | 2.49 | 1.73  | [ 0.15 , 3.32] | Non-inferiority not shown | 0.032  |
| [MoP] Furlong Cemented Stem JRI Cemented Cup                  | 443   | 1.25 | 0.50  | [-0.59 , 1.58] | Non-inferiority not shown | 0.370  |
| [MoP] Furlong HAC Stem CSF                                    | 2,566 | 1.90 | 1.14  | [ 0.49 , 1.79] | Inferior by $\geq 20\%$   | 0.001  |
| [MoP] Furlong HAC Stem Furlong HAC CSF Plus                   | 1,170 | 2.43 | 1.68  | [ 0.85 , 2.50] | Inferior by $\geq 100\%$  | <0.001 |
| [MoP] M/L Taper Cementless Allofit                            | 339   | 1.83 | 1.08  | [-0.26 , 2.41] | Non-inferiority not shown | 0.113  |
| [MoP] Muller Straight Stem Original ME Muller Low Profile Cup | 414   | 0.52 | -0.24 | [-0.97 , 0.49] | Non-inferiority not shown | 0.522  |
| [MoP] Muller-Biomet Apollo                                    | 748   | 1.13 | 0.37  | [-0.48 , 1.22] | Non-inferiority not shown | 0.395  |
| [MoP] Omnifit Cemented Stem ODC                               | 267   | 1.04 | 0.28  | [-0.96 , 1.52] | Non-inferiority not shown | 0.661  |
| [MoP] Polarstem Cementless R3 Cementless                      | 476   | 1.24 | 0.48  | [-0.21 , 1.18] | Non-inferiority not shown | 0.174  |
| [MoP] SL-Plus Cementless Stem EP-Fit Plus                     | 826   | 2.89 | 2.13  | [ 1.01 , 3.26] | Inferior by $\geq 100\%$  | <0.001 |
| [MoP] Stanmore Modular Stem SHP Cup                           | 267   | 0.99 | 0.23  | [-0.97 , 1.44] | Non-inferiority not shown | 0.702  |
| [MoP] Stanmore Modular Stem Stanmore-Arcom Cup                | 1,070 | 1.02 | 0.26  | [-0.44 , 0.97] | Non-inferiority not shown | 0.461  |
| [MoP] Synergy Cementless Stem R3 Cementless                   | 503   | 1.52 | 0.76  | [-0.10 , 1.63] | Non-inferiority not shown | 0.083  |
| [MoP] Synergy Cementless Stem Reflection Cementless           | 591   | 1.14 | 0.38  | [-0.56 , 1.32] | Non-inferiority not shown | 0.429  |
| [MoP] Taperloc Cementless Stem Exceed ABT                     | 1,447 | 1.40 | 0.64  | [ 0.00 , 1.28] | Non-inferiority not shown | 0.049  |
| [MoP] Versys Cementless Stem Trilogy                          | 369   | 4.30 | 3.54  | [ 1.49 , 5.58] | Inferior by $\geq 100\%$  | 0.001  |

**Supplemental table 6b: Difference in Kaplan-Meier failure estimate between a contemporary reference and implants with at least 250 at risk at 5 years since primary in males**

| Stem/cup brand                                                | Number at risk | Cumulative failure (%) | Difference in failure (%) | 95% CI         | Equivalence status        | p-value |
|---------------------------------------------------------------|----------------|------------------------|---------------------------|----------------|---------------------------|---------|
| [MoP] Exeter V40 Elite Plus Ogee                              | 4,143          | 1.29                   | [REFERENCE]               |                |                           |         |
| [CoC] ABG II Monolithic Cementless Stem ABG II Cementless Cup | 536            | 2.75                   | 1.47                      | [ 0.11 , 2.82] | Non-inferiority not shown | 0.035   |
| [CoC] ABG II Monolithic Cementless Stem Trident               | 463            | 3.15                   | 1.86                      | [ 0.36 , 3.37] | Inferior by $\geq 20\%$   | 0.015   |
| [CoC] Accolade Trident                                        | 2,264          | 3.15                   | 1.87                      | [ 1.19 , 2.54] | Inferior by $\geq 20\%$   | <0.001  |
| [CoC] Bimetric Cementless Stem Exceed ABT                     | 259            | 1.75                   | 0.46                      | [-0.86 , 1.79] | Non-inferiority not shown | 0.494   |
| [CoC] Corail DeltaMotion                                      | 261            | 1.91                   | 0.62                      | [-0.59 , 1.83] | Non-inferiority not shown | 0.315   |
| [CoC] Corail Duraloc Option                                   | 449            | 3.36                   | 2.07                      | [ 0.43 , 3.72] | Inferior by $\geq 20\%$   | 0.013   |
| [CoC] Corail Pinnacle                                         | 7,860          | 2.68                   | 1.40                      | [ 1.01 , 1.79] | Inferior by $\geq 20\%$   | <0.001  |
| [CoC] Exeter V40 ABG II Cementless Cup                        | 379            | 1.39                   | 0.10                      | [-0.97 , 1.17] | Non-inferiority not shown | 0.852   |
| [CoC] Exeter V40 Trident                                      | 3,289          | 1.81                   | 0.52                      | [ 0.04 , 1.00] | Non-inferiority not shown | 0.034   |
| [CoC] Furlong HAC Stem CSF                                    | 664            | 3.19                   | 1.91                      | [ 0.59 , 3.22] | Inferior by $\geq 20\%$   | 0.005   |
| [CoC] Furlong HAC Stem Furlong HAC CSF Plus                   | 2,393          | 1.91                   | 0.62                      | [ 0.15 , 1.10] | Non-inferiority not shown | 0.010   |
| [CoC] M/L Taper Cementless Continuum                          | 304            | 1.73                   | 0.44                      | [-0.42 , 1.31] | Non-inferiority not shown | 0.316   |
| [CoC] SL-Plus Cementless Stem EP-Fit Plus                     | 551            | 6.43                   | 5.14                      | [ 3.22 , 7.07] | Inferior by $\geq 100\%$  | <0.001  |



|                                                            |       |      |       |                 |                           |        |
|------------------------------------------------------------|-------|------|-------|-----------------|---------------------------|--------|
| [CoC] Taperloc Cementless Stem Exceed ABT                  | 1,657 | 1.87 | 0.59  | [ 0.07 , 1.11]  | Non-inferiority not shown | 0.027  |
| [CoP] Accolade Trident                                     | 544   | 2.06 | 0.77  | [ 0.05 , 1.50]  | Non-inferiority not shown | 0.037  |
| [CoP] C-Stem Cemented Stem Opera                           | 283   | 1.49 | 0.21  | [-1.13 , 1.54]  | Non-inferiority not shown | 0.759  |
| [CoP] C-Stem Cemented Stem Wroblewski Golf Ball            | 321   | 1.47 | 0.18  | [-1.03 , 1.39]  | Non-inferiority not shown | 0.769  |
| [CoP] Corail Pinnacle                                      | 1,695 | 1.78 | 0.49  | [ 0.01 , 0.98]  | Non-inferiority not shown | 0.047  |
| [CoP] Exeter V40 Elite Plus Ogee                           | 381   | 1.11 | -0.18 | [-1.06 , 0.71]  | Non-inferiority not shown | 0.697  |
| [CoP] Exeter V40 Exeter Contemporary Flanged               | 789   | 0.85 | -0.44 | [-0.98 , 0.11]  | Non-inferior              | 0.116  |
| [CoP] Exeter V40 Exeter Duration                           | 261   | 1.01 | -0.28 | [-1.46 , 0.90]  | Non-inferiority not shown | 0.641  |
| [CoP] Exeter V40 Trident                                   | 891   | 0.96 | -0.33 | [-0.79 , 0.13]  | Non-inferior              | 0.162  |
| [CoP] Exeter V40 Trilogy                                   | 631   | 2.00 | 0.72  | [-0.27 , 1.71]  | Non-inferiority not shown | 0.154  |
| [CoP] Furlong HAC Stem CSF                                 | 2,209 | 1.39 | 0.10  | [-0.42 , 0.62]  | Non-inferiority not shown | 0.703  |
| [CoP] Furlong HAC Stem Furlong HAC CSF Plus                | 400   | 1.38 | 0.10  | [-0.69 , 0.88]  | Non-inferiority not shown | 0.809  |
| [CoP] MS-30 Original ME Muller Low Profile Cup             | 330   | 0.35 | -0.94 | [-1.50 , -0.38] | Non-inferior              | 0.001  |
| [CoP] SL-Plus Cementless Stem Bicon-Plus                   | 253   | 4.74 | 3.46  | [ 1.01 , 5.90]  | Inferior by $\geq 20\%$   | 0.006  |
| [CoP] SL-Plus Cementless Stem EP-Fit Plus                  | 312   | 3.28 | 1.99  | [ 0.14 , 3.85]  | Non-inferiority not shown | 0.035  |
| [CoP] Taperloc Cementless Stem Exceed ABT                  | 309   | 1.70 | 0.42  | [-0.54 , 1.37]  | Non-inferiority not shown | 0.391  |
| [MoP] Accolade Trident                                     | 2,404 | 3.37 | 2.08  | [ 1.45 , 2.71]  | Inferior by $\geq 100\%$  | <0.001 |
| [MoP] C-Stem AMT Cemented Stem Charnley and Elite Plus LPW | 444   | 1.81 | 0.52  | [-0.44 , 1.47]  | Non-inferiority not shown | 0.286  |
| [MoP] C-Stem AMT Cemented Stem Elite Plus Ogee             | 253   | 0.61 | -0.68 | [-1.34 , -0.01] | Non-inferior              | 0.045  |
| [MoP] C-Stem Cemented Stem Charnley and Elite Plus LPW     | 429   | 1.01 | -0.27 | [-1.20 , 0.66]  | Non-inferiority not shown | 0.564  |
| [MoP] C-Stem Cemented Stem Elite Plus Ogee                 | 906   | 1.28 | 0.00  | [-0.66 , 0.66]  | Non-inferiority not shown | 0.997  |
| [MoP] C-Stem Cemented Stem Marathon                        | 274   | 1.82 | 0.54  | [-0.48 , 1.55]  | Non-inferiority not shown | 0.300  |
| [MoP] C-Stem Cemented Stem Opera                           | 389   | 2.23 | 0.94  | [-0.34 , 2.23]  | Non-inferiority not shown | 0.149  |
| [MoP] C-Stem Cemented Stem Wroblewski Golf Ball            | 269   | 1.29 | 0.00  | [-1.16 , 1.16]  | Non-inferiority not shown | 0.999  |
| [MoP] CPCS Opera                                           | 281   | 0.51 | -0.77 | [-1.54 , -0.01] | Non-inferior              | 0.048  |
| [MoP] CPT Elite Plus Ogee                                  | 630   | 2.35 | 1.07  | [ 0.02 , 2.11]  | Non-inferiority not shown | 0.046  |
| [MoP] CPT Trilogy                                          | 1,862 | 2.39 | 1.11  | [ 0.50 , 1.71]  | Inferior by $\geq 20\%$   | <0.001 |
| [MoP] CPT ZCA                                              | 1,549 | 2.42 | 1.13  | [ 0.46 , 1.80]  | Inferior by $\geq 20\%$   | 0.001  |
| [MoP] Charnley Cemented Stem Charnley Cemented Cup         | 1,338 | 2.22 | 0.93  | [ 0.15 , 1.71]  | Non-inferiority not shown | 0.019  |
| [MoP] Charnley Cemented Stem Charnley Ogee                 | 2,824 | 2.29 | 1.00  | [ 0.42 , 1.58]  | Inferior by $\geq 20\%$   | 0.001  |
| [MoP] Charnley Cemented Stem Charnley and Elite Plus LPW   | 1,414 | 1.42 | 0.14  | [-0.49 , 0.76]  | Non-inferiority not shown | 0.667  |
| [MoP] Charnley Cemented Stem Opera                         | 343   | 1.68 | 0.40  | [-0.88 , 1.67]  | Non-inferiority not shown | 0.540  |
| [MoP] Charnley Cemented Stem Wroblewski Golf Ball          | 311   | 1.75 | 0.47  | [-0.86 , 1.79]  | Non-inferiority not shown | 0.489  |
| [MoP] Corail Duraloc Cementless Cup                        | 1,204 | 2.54 | 1.25  | [ 0.36 , 2.14]  | Inferior by $\geq 20\%$   | 0.006  |
| [MoP] Corail Elite Plus Ogee                               | 352   | 1.79 | 0.50  | [-0.66 , 1.66]  | Non-inferiority not shown | 0.397  |
| [MoP] Corail Marathon                                      | 465   | 1.77 | 0.48  | [-0.28 , 1.24]  | Non-inferiority not shown | 0.216  |
| [MoP] Corail Pinnacle                                      | 6,318 | 1.91 | 0.63  | [ 0.26 , 0.99]  | Inferior by $\geq 20\%$   | 0.001  |
| [MoP] Corail Trilogy                                       | 526   | 2.48 | 1.20  | [ 0.01 , 2.38]  | Non-inferiority not shown | 0.047  |
| [MoP] Exeter V40 Cenator Cemented Cup                      | 573   | 1.74 | 0.45  | [-0.53 , 1.43]  | Non-inferiority not shown | 0.366  |
| [MoP] Exeter V40 Charnley and Elite Plus LPW               | 504   | 1.09 | -0.20 | [-0.97 , 0.57]  | Non-inferiority not shown | 0.612  |
| [MoP] Exeter V40 Duraloc Cementless Cup                    | 330   | 2.45 | 1.16  | [-0.44 , 2.77]  | Non-inferiority not shown | 0.156  |
| [MoP] Exeter V40 Elite Plus Cemented Cup                   | 906   | 1.20 | -0.09 | [-0.74 , 0.57]  | Non-inferiority not shown | 0.797  |
| [MoP] Exeter V40 Exeter Contemporary Flanged               | 8,757 | 1.54 | 0.26  | [-0.09 , 0.60]  | Non-inferiority not shown | 0.145  |
| [MoP] Exeter V40 Exeter Contemporary Hooded                | 3,570 | 2.27 | 0.98  | [ 0.51 , 1.45]  | Inferior by $\geq 20\%$   | <0.001 |
| [MoP] Exeter V40 Exeter Duration                           | 3,104 | 2.30 | 1.02  | [ 0.49 , 1.54]  | Inferior by $\geq 20\%$   | <0.001 |
| [MoP] Exeter V40 Exeter X3 Rimfit                          | 309   | 1.61 | 0.33  | [-0.31 , 0.96]  | Non-inferiority not shown | 0.314  |

|                                                               |       |      |       |                |                           |        |
|---------------------------------------------------------------|-------|------|-------|----------------|---------------------------|--------|
| [MoP] Exeter V40 Opera                                        | 515   | 1.66 | 0.37  | [-0.61 , 1.35] | Non-inferiority not shown | 0.457  |
| [MoP] Exeter V40 Pinnacle                                     | 471   | 2.43 | 1.14  | [ 0.13 , 2.15] | Non-inferiority not shown | 0.027  |
| [MoP] Exeter V40 Reflection Cementless                        | 649   | 2.49 | 1.21  | [ 0.06 , 2.35] | Non-inferiority not shown | 0.039  |
| [MoP] Exeter V40 Trident                                      | 3,769 | 1.68 | 0.40  | [-0.00 , 0.80] | Non-inferiority not shown | 0.051  |
| [MoP] Exeter V40 Trilogy                                      | 2,555 | 1.46 | 0.18  | [-0.31 , 0.66] | Non-inferiority not shown | 0.473  |
| [MoP] Exeter V40 Ultima Cemented Cup                          | 321   | 2.77 | 1.48  | [-0.16 , 3.12] | Non-inferiority not shown | 0.077  |
| [MoP] Furlong Cemented Stem JRI Cemented Cup                  | 396   | 1.48 | 0.19  | [-0.93 , 1.32] | Non-inferiority not shown | 0.735  |
| [MoP] Furlong HAC Stem CSF                                    | 2,076 | 2.31 | 1.02  | [ 0.40 , 1.64] | Inferior by $\geq 20\%$   | 0.001  |
| [MoP] Furlong HAC Stem Furlong HAC CSF Plus                   | 686   | 3.15 | 1.86  | [ 0.94 , 2.79] | Inferior by $\geq 20\%$   | <0.001 |
| [MoP] Muller Straight Stem Original ME Muller Low Profile Cup | 291   | 0.78 | -0.51 | [-1.33 , 0.31] | Non-inferiority not shown | 0.224  |
| [MoP] Muller-Biomet Apollo                                    | 568   | 1.27 | -0.02 | [-0.85 , 0.81] | Non-inferiority not shown | 0.967  |
| [MoP] SL-Plus Cementless Stem EP-Fit Plus                     | 672   | 4.08 | 2.79  | [ 1.48 , 4.11] | Inferior by $\geq 100\%$  | <0.001 |
| [MoP] Stanmore Modular Stem Stanmore-Arcom Cup                | 805   | 1.43 | 0.15  | [-0.59 , 0.89] | Non-inferiority not shown | 0.697  |
| [MoP] Synergy Cementless Stem Reflection Cementless           | 546   | 2.18 | 0.90  | [-0.31 , 2.10] | Non-inferiority not shown | 0.146  |
| [MoP] Taperloc Cementless Stem Exceed ABT                     | 657   | 1.71 | 0.42  | [-0.23 , 1.08] | Non-inferiority not shown | 0.208  |
| [MoP] Versys Cementless Stem Trilogy                          | 336   | 4.56 | 3.28  | [ 1.20 , 5.36] | Inferior by $\geq 20\%$   | 0.002  |

**Supplemental table 6c: Difference in Kaplan-Meier failure estimate between a contemporary reference and implants with at least 250 at risk at 7 years since primary in males**

| Stem/cup brand                                                | Number at risk | Cumulative failure (%) | Difference in failure (%) | 95% CI          | Equivalence status        | p-value |
|---------------------------------------------------------------|----------------|------------------------|---------------------------|-----------------|---------------------------|---------|
| [CoP] Furlong HAC Stem CSF                                    | 1,823          | 1.64                   | [REFERENCE]               |                 |                           |         |
| [CoC] ABG II Monolithic Cementless Stem ABG II Cementless Cup | 469            | 3.52                   | 1.89                      | [ 0.29 , 3.48]  | Non-inferiority not shown | 0.020   |
| [CoC] ABG II Monolithic Cementless Stem Trident               | 365            | 4.06                   | 2.42                      | [ 0.64 , 4.20]  | Inferior by $\geq 20\%$   | 0.008   |
| [CoC] Accolade Trident                                        | 1,234          | 3.47                   | 1.84                      | [ 1.01 , 2.66]  | Inferior by $\geq 20\%$   | <0.001  |
| [CoC] Corail Duraloc Option                                   | 354            | 4.27                   | 2.64                      | [ 0.74 , 4.54]  | Inferior by $\geq 20\%$   | 0.006   |
| [CoC] Corail Pinnacle                                         | 3,192          | 3.28                   | 1.64                      | [ 1.05 , 2.23]  | Inferior by $\geq 20\%$   | <0.001  |
| [CoC] Exeter V40 ABG II Cementless Cup                        | 304            | 1.98                   | 0.35                      | [-1.05 , 1.75]  | Non-inferiority not shown | 0.627   |
| [CoC] Exeter V40 Trident                                      | 2,289          | 2.18                   | 0.54                      | [-0.12 , 1.20]  | Non-inferiority not shown | 0.108   |
| [CoC] Furlong HAC Stem CSF                                    | 630            | 3.34                   | 1.71                      | [ 0.30 , 3.11]  | Non-inferiority not shown | 0.017   |
| [CoC] Furlong HAC Stem Furlong HAC CSF Plus                   | 913            | 2.10                   | 0.47                      | [-0.18 , 1.11]  | Non-inferiority not shown | 0.158   |
| [CoC] SL-Plus Cementless Stem EP-Fit Plus                     | 483            | 6.96                   | 5.33                      | [ 3.28 , 7.38]  | Inferior by $\geq 100\%$  | <0.001  |
| [CoC] Taperloc Cementless Stem Exceed ABT                     | 628            | 2.14                   | 0.51                      | [-0.23 , 1.24]  | Non-inferiority not shown | 0.175   |
| [CoP] C-Stem Cemented Stem Wroblewski Golf Ball               | 252            | 1.47                   | -0.17                     | [-1.44 , 1.11]  | Non-inferiority not shown | 0.796   |
| [CoP] Corail Pinnacle                                         | 611            | 2.30                   | 0.66                      | [-0.12 , 1.45]  | Non-inferiority not shown | 0.098   |
| [CoP] Exeter V40 Exeter Contemporary Flanged                  | 417            | 0.85                   | -0.79                     | [-1.46 , -0.11] | Non-inferior              | 0.022   |
| [CoP] Exeter V40 Trident                                      | 459            | 1.46                   | -0.18                     | [-1.01 , 0.65]  | Non-inferiority not shown | 0.676   |
| [CoP] Exeter V40 Trilogy                                      | 438            | 2.16                   | 0.53                      | [-0.58 , 1.64]  | Non-inferiority not shown | 0.351   |
| [MoP] Accolade Trident                                        | 1,060          | 4.24                   | 2.60                      | [ 1.71 , 3.49]  | Inferior by $\geq 100\%$  | <0.001  |
| [MoP] C-Stem Cemented Stem Charnley and Elite Plus LPW        | 384            | 1.01                   | -0.62                     | [-1.63 , 0.39]  | Non-inferiority not shown | 0.227   |
| [MoP] C-Stem Cemented Stem Elite Plus Ogee                    | 654            | 1.54                   | -0.09                     | [-0.94 , 0.76]  | Non-inferiority not shown | 0.830   |
| [MoP] C-Stem Cemented Stem Opera                              | 282            | 2.55                   | 0.92                      | [-0.56 , 2.40]  | Non-inferiority not shown | 0.225   |
| [MoP] CPT Elite Plus Ogee                                     | 436            | 2.51                   | 0.87                      | [-0.29 , 2.03]  | Non-inferiority not shown | 0.140   |
| [MoP] CPT Trilogy                                             | 1,134          | 2.68                   | 1.04                      | [ 0.28 , 1.81]  | Non-inferiority not shown | 0.008   |
| [MoP] CPT ZCA                                                 | 1,009          | 3.27                   | 1.63                      | [ 0.71 , 2.56]  | Inferior by $\geq 20\%$   | 0.001   |
| [MoP] Charnley Cemented Stem Charnley Cemented Cup            | 1,126          | 2.94                   | 1.31                      | [ 0.31 , 2.30]  | Non-inferiority not shown | 0.010   |
| [MoP] Charnley Cemented Stem Charnley Ogee                    | 2,211          | 3.41                   | 1.77                      | [ 0.96 , 2.58]  | Inferior by $\geq 20\%$   | <0.001  |
| [MoP] Charnley Cemented Stem Charnley and Elite Plus LPW      | 1,116          | 1.90                   | 0.26                      | [-0.57 , 1.09]  | Non-inferiority not shown | 0.539   |
| [MoP] Charnley Cemented Stem Wroblewski Golf Ball             | 256            | 2.09                   | 0.46                      | [-1.07 , 1.98]  | Non-inferiority not shown | 0.559   |
| [MoP] Corail Duraloc Cementless Cup                           | 967            | 3.62                   | 1.98                      | [ 0.84 , 3.13]  | Inferior by $\geq 20\%$   | 0.001   |
| [MoP] Corail Pinnacle                                         | 2,826          | 2.42                   | 0.79                      | [ 0.21 , 1.37]  | Non-inferiority not shown | 0.008   |
| [MoP] Corail Trilogy                                          | 323            | 3.87                   | 2.23                      | [ 0.58 , 3.89]  | Inferior by $\geq 20\%$   | 0.008   |
| [MoP] Exeter V40 Cenator Cemented Cup                         | 415            | 2.35                   | 0.71                      | [-0.55 , 1.97]  | Non-inferiority not shown | 0.267   |
| [MoP] Exeter V40 Charnley and Elite Plus LPW                  | 294            | 1.33                   | -0.30                     | [-1.29 , 0.68]  | Non-inferiority not shown | 0.547   |
| [MoP] Exeter V40 Elite Plus Cemented Cup                      | 608            | 1.20                   | -0.44                     | [-1.20 , 0.33]  | Non-inferiority not shown | 0.266   |
| [MoP] Exeter V40 Elite Plus Ogee                              | 2,790          | 1.68                   | 0.04                      | [-0.56 , 0.64]  | Non-inferiority not shown | 0.888   |
| [MoP] Exeter V40 Exeter Contemporary Flanged                  | 5,272          | 2.01                   | 0.37                      | [-0.18 , 0.92]  | Non-inferiority not shown | 0.183   |
| [MoP] Exeter V40 Exeter Contemporary Hooded                   | 2,263          | 2.84                   | 1.20                      | [ 0.53 , 1.88]  | Inferior by $\geq 20\%$   | <0.001  |
| [MoP] Exeter V40 Exeter Duration                              | 2,100          | 3.36                   | 1.72                      | [ 0.96 , 2.49]  | Inferior by $\geq 20\%$   | <0.001  |
| [MoP] Exeter V40 Opera                                        | 340            | 2.14                   | 0.50                      | [-0.75 , 1.75]  | Non-inferiority not shown | 0.432   |
| [MoP] Exeter V40 Reflection Cementless                        | 483            | 3.34                   | 1.70                      | [ 0.29 , 3.12]  | Non-inferiority not shown | 0.018   |

|                                                     |       |      |       |                |                           |        |
|-----------------------------------------------------|-------|------|-------|----------------|---------------------------|--------|
| [MoP] Exeter V40 Trident                            | 2,065 | 2.04 | 0.41  | [-0.20 , 1.01] | Non-inferiority not shown | 0.191  |
| [MoP] Exeter V40 Trilogy                            | 1,688 | 1.88 | 0.25  | [-0.44 , 0.93] | Non-inferiority not shown | 0.477  |
| [MoP] Exeter V40 Ultima Cemented Cup                | 282   | 2.77 | 1.13  | [-0.55 , 2.82] | Non-inferiority not shown | 0.188  |
| [MoP] Furlong Cemented Stem JRI Cemented Cup        | 312   | 1.77 | 0.13  | [-1.18 , 1.45] | Non-inferiority not shown | 0.843  |
| [MoP] Furlong HAC Stem CSF                          | 1,556 | 3.09 | 1.46  | [ 0.62 , 2.29] | Inferior by $\geq 20\%$   | 0.001  |
| [MoP] Furlong HAC Stem Furlong HAC CSF Plus         | 265   | 3.66 | 2.02  | [ 0.80 , 3.25] | Inferior by $\geq 20\%$   | 0.001  |
| [MoP] Muller-Biomet Apollo                          | 376   | 1.46 | -0.18 | [-1.17 , 0.81] | Non-inferiority not shown | 0.722  |
| [MoP] SL-Plus Cementless Stem EP-Fit Plus           | 483   | 5.32 | 3.69  | [ 2.08 , 5.29] | Inferior by $\geq 100\%$  | <0.001 |
| [MoP] Stanmore Modular Stem Stanmore-Arcom Cup      | 529   | 1.86 | 0.23  | [-0.74 , 1.20] | Non-inferiority not shown | 0.644  |
| [MoP] Synergy Cementless Stem Reflection Cementless | 396   | 2.37 | 0.73  | [-0.59 , 2.05] | Non-inferiority not shown | 0.277  |
| [MoP] Versys Cementless Stem Trilogy                | 297   | 4.56 | 2.93  | [ 0.81 , 5.05] | Inferior by $\geq 20\%$   | 0.007  |

**Supplemental table 6d: Difference in Kaplan-Meier failure estimate between a contemporary reference and implants with at least 250 at risk at 10 years since primary in males**

| <b>Stem/cup brand</b>                                         | <b>Number at risk</b> | <b>Cumulative failure (%)</b> | <b>Difference in failure (%)</b> | <b>95% CI</b>  | <b>Equivalence status</b> | <b>p-value</b> |
|---------------------------------------------------------------|-----------------------|-------------------------------|----------------------------------|----------------|---------------------------|----------------|
| [CoP] Furlong HAC Stem CSF                                    | 1,054                 | 2.03                          | [REFERENCE]                      |                |                           |                |
| [CoC] ABG II Monolithic Cementless Stem ABG II Cementless Cup | 348                   | 5.43                          | 3.40                             | [ 1.33 , 5.47] | Inferior by $\geq 20\%$   | 0.001          |
| [CoC] Corail Pinnacle                                         | 363                   | 4.24                          | 2.21                             | [ 1.28 , 3.15] | Inferior by $\geq 20\%$   | <0.001         |
| [CoC] Exeter V40 Trident                                      | 767                   | 2.76                          | 0.74                             | [-0.10 , 1.57] | Non-inferiority not shown | 0.083          |
| [CoC] Furlong HAC Stem CSF                                    | 360                   | 4.28                          | 2.25                             | [ 0.60 , 3.90] | Inferior by $\geq 20\%$   | 0.008          |
| [MoP] C-Stem Cemented Stem Elite Plus Ogee                    | 313                   | 2.71                          | 0.68                             | [-0.63 , 1.98] | Non-inferiority not shown | 0.308          |
| [MoP] CPT Trilogy                                             | 382                   | 4.61                          | 2.58                             | [ 1.24 , 3.92] | Inferior by $\geq 20\%$   | <0.001         |
| [MoP] CPT ZCA                                                 | 332                   | 4.41                          | 2.38                             | [ 1.15 , 3.61] | Inferior by $\geq 20\%$   | <0.001         |
| [MoP] Charnley Cemented Stem Charnley Cemented Cup            | 615                   | 4.69                          | 2.66                             | [ 1.32 , 4.00] | Inferior by $\geq 20\%$   | <0.001         |
| [MoP] Charnley Cemented Stem Charnley Ogee                    | 1,151                 | 5.08                          | 3.05                             | [ 2.00 , 4.10] | Inferior by $\geq 20\%$   | <0.001         |
| [MoP] Charnley Cemented Stem Charnley and Elite Plus LPW      | 661                   | 2.93                          | 0.90                             | [-0.21 , 2.01] | Non-inferiority not shown | 0.114          |
| [MoP] Corail Duraloc Cementless Cup                           | 418                   | 6.69                          | 4.66                             | [ 2.92 , 6.41] | Inferior by $\geq 100\%$  | <0.001         |
| [MoP] Corail Pinnacle                                         | 638                   | 3.49                          | 1.47                             | [ 0.63 , 2.30] | Inferior by $\geq 20\%$   | 0.001          |
| [MoP] Exeter V40 Elite Plus Ogee                              | 1,105                 | 2.53                          | 0.51                             | [-0.31 , 1.32] | Non-inferiority not shown | 0.226          |
| [MoP] Exeter V40 Exeter Contemporary Flanged                  | 1,517                 | 2.88                          | 0.85                             | [ 0.13 , 1.57] | Non-inferiority not shown | 0.020          |
| [MoP] Exeter V40 Exeter Contemporary Hooded                   | 760                   | 4.17                          | 2.15                             | [ 1.19 , 3.11] | Inferior by $\geq 20\%$   | <0.001         |
| [MoP] Exeter V40 Exeter Duration                              | 888                   | 4.95                          | 2.92                             | [ 1.88 , 3.96] | Inferior by $\geq 20\%$   | <0.001         |
| [MoP] Exeter V40 Trident                                      | 402                   | 2.84                          | 0.81                             | [-0.12 , 1.74] | Non-inferiority not shown | 0.089          |
| [MoP] Exeter V40 Trilogy                                      | 583                   | 3.02                          | 0.99                             | [ 0.02 , 1.96] | Non-inferiority not shown | 0.045          |
| [MoP] Furlong HAC Stem CSF                                    | 609                   | 4.76                          | 2.73                             | [ 1.56 , 3.90] | Inferior by $\geq 20\%$   | <0.001         |

**Supplemental table 7a: Difference in Kaplan-Meier failure estimate between a contemporary reference and implants with at least 250 at risk at 3 years since primary in males <55 years**

| Stem/cup brand                              | Number at risk | Cumulative failure (%) | Difference in failure (%) | 95% CI         | Equivalence status        | p-value |
|---------------------------------------------|----------------|------------------------|---------------------------|----------------|---------------------------|---------|
| [CoC] Exeter V40 Trident                    | 1,269          | 1.26                   | [REFERENCE]               |                |                           |         |
| [CoC] Accolade Trident                      | 730            | 2.96                   | 1.70                      | [ 0.41 , 3.00] | Inferior by $\geq 20\%$   | 0.010   |
| [CoC] Corail Pinnacle                       | 3,796          | 2.29                   | 1.03                      | [ 0.33 , 1.74] | Inferior by $\geq 20\%$   | 0.004   |
| [CoC] Furlong HAC Stem Furlong HAC CSF Plus | 837            | 1.71                   | 0.46                      | [-0.49 , 1.41] | Non-inferiority not shown | 0.345   |
| [CoC] M/L Taper Cementless Continuum        | 296            | 2.21                   | 0.95                      | [-0.59 , 2.49] | Non-inferiority not shown | 0.226   |
| [CoC] Taperloc Cementless Stem Exceed ABT   | 836            | 2.23                   | 0.98                      | [-0.05 , 2.00] | Non-inferiority not shown | 0.062   |
| [CoP] Accolade Trident                      | 251            | 2.12                   | 0.87                      | [-0.64 , 2.37] | Non-inferiority not shown | 0.259   |
| [CoP] Corail Pinnacle                       | 509            | 1.90                   | 0.64                      | [-0.34 , 1.62] | Non-inferiority not shown | 0.201   |
| [CoP] Exeter V40 Trident                    | 369            | 0.81                   | -0.44                     | [-1.25 , 0.37] | Non-inferiority not shown | 0.286   |
| [MoP] Corail Pinnacle                       | 417            | 1.20                   | -0.06                     | [-1.12 , 1.00] | Non-inferiority not shown | 0.915   |

**Supplemental table 7b: Difference in Kaplan-Meier failure estimate between a contemporary reference and implants with at least 250 at risk at 5 years since primary in males <55 years**

| <b>Stem/cup brand</b>                       | <b>Number at risk</b> | <b>Cumulative failure (%)</b> | <b>Difference in failure (%)</b> | <b>95% CI</b>   | <b>Equivalence status</b> | <b>p-value</b> |
|---------------------------------------------|-----------------------|-------------------------------|----------------------------------|-----------------|---------------------------|----------------|
| [CoC] Corail Pinnacle                       | 2,313                 | 3.33                          | [REFERENCE]                      |                 |                           |                |
| [CoC] Accolade Trident                      | 502                   | 4.15                          | 0.82                             | [-0.70 , 2.34]  | Non-inferiority not shown | 0.290          |
| [CoC] Exeter V40 Trident                    | 934                   | 1.87                          | -1.46                            | [-2.36 , -0.56] | Non-inferior              | 0.001          |
| [CoC] Furlong HAC Stem Furlong HAC CSF Plus | 494                   | 1.85                          | -1.48                            | [-2.45 , -0.50] | Non-inferior              | 0.003          |
| [CoC] Taperloc Cementless Stem Exceed ABT   | 430                   | 2.57                          | -0.76                            | [-1.88 , 0.35]  | Non-inferior              | 0.179          |

**Supplemental table 8a: Difference in Kaplan-Meier failure estimate between a contemporary reference and implants with at least 250 at risk at 3 years since primary in males between 55 and 75 years**

| Stem/cup brand                                                | Number at risk | Cumulative failure (%) | Difference in failure (%) | 95% CI          | Equivalence status        | p-value |
|---------------------------------------------------------------|----------------|------------------------|---------------------------|-----------------|---------------------------|---------|
| [CoP] Exeter V40 Trident                                      | 1,339          | 0.83                   | [REFERENCE]               |                 |                           |         |
| [CoC] ABG II Monolithic Cementless Stem ABG II Cementless Cup | 408            | 2.58                   | 1.75                      | [ 0.21 , 3.30]  | Inferior by $\geq 20\%$   | 0.026   |
| [CoC] ABG II Monolithic Cementless Stem Trident               | 368            | 1.82                   | 0.99                      | [-0.39 , 2.37]  | Non-inferiority not shown | 0.159   |
| [CoC] Accolade Trident                                        | 2,101          | 2.16                   | 1.33                      | [ 0.64 , 2.02]  | Inferior by $\geq 20\%$   | <0.001  |
| [CoC] Bimetric Cementless Stem Exceed ABT                     | 279            | 0.60                   | -0.22                     | [-1.13 , 0.68]  | Non-inferiority not shown | 0.628   |
| [CoC] Corail Duraloc Option                                   | 311            | 1.86                   | 1.04                      | [-0.48 , 2.55]  | Non-inferiority not shown | 0.181   |
| [CoC] Corail Pinnacle                                         | 8,280          | 1.71                   | 0.89                      | [ 0.46 , 1.31]  | Inferior by $\geq 20\%$   | <0.001  |
| [CoC] Excia Cementless Plasmacup SC                           | 284            | 1.25                   | 0.42                      | [-0.72 , 1.57]  | Non-inferiority not shown | 0.468   |
| [CoC] Exeter V40 ABG II Cementless Cup                        | 324            | 0.80                   | -0.03                     | [-0.99 , 0.93]  | Non-inferiority not shown | 0.949   |
| [CoC] Exeter V40 Trident                                      | 2,957          | 1.06                   | 0.23                      | [-0.26 , 0.72]  | Non-inferiority not shown | 0.350   |
| [CoC] Furlong HAC Stem CSF                                    | 452            | 3.36                   | 2.53                      | [ 0.88 , 4.19]  | Inferior by $\geq 100\%$  | 0.003   |
| [CoC] Furlong HAC Stem Furlong HAC CSF Plus                   | 2,839          | 1.63                   | 0.80                      | [ 0.27 , 1.33]  | Inferior by $\geq 20\%$   | 0.003   |
| [CoC] M/L Taper Cementless Continuum                          | 405            | 1.41                   | 0.58                      | [-0.45 , 1.61]  | Non-inferiority not shown | 0.269   |
| [CoC] Polarstem Cementless R3 Cementless                      | 256            | 0.54                   | -0.29                     | [-1.11 , 0.54]  | Non-inferiority not shown | 0.496   |
| [CoC] SL-Plus Cementless Stem EP-Fit Plus                     | 398            | 4.90                   | 4.07                      | [ 2.00 , 6.14]  | Inferior by $\geq 100\%$  | <0.001  |
| [CoC] Taperloc Cementless Stem Exceed ABT                     | 2,008          | 1.40                   | 0.58                      | [ 0.02 , 1.13]  | Non-inferiority not shown | 0.041   |
| [CoP] Accolade Trident                                        | 975            | 1.56                   | 0.73                      | [ 0.03 , 1.44]  | Non-inferiority not shown | 0.042   |
| [CoP] C-Stem Cemented Stem Marathon                           | 344            | 0.69                   | -0.14                     | [-0.92 , 0.64]  | Non-inferiority not shown | 0.726   |
| [CoP] C-Stem Cemented Stem Wroblewski Golf Ball               | 273            | 0.31                   | -0.52                     | [-1.21 , 0.17]  | Non-inferiority not shown | 0.142   |
| [CoP] CPT Trilogy                                             | 274            | 1.73                   | 0.90                      | [-0.14 , 1.94]  | Non-inferiority not shown | 0.089   |
| [CoP] Corail Marathon                                         | 368            | 1.84                   | 1.02                      | [-0.12 , 2.15]  | Non-inferiority not shown | 0.079   |
| [CoP] Corail Pinnacle                                         | 2,678          | 0.94                   | 0.11                      | [-0.33 , 0.54]  | Non-inferiority not shown | 0.630   |
| [CoP] Exeter V40 Charnley and Elite Plus LPW                  | 275            | 1.16                   | 0.33                      | [-0.85 , 1.52]  | Non-inferiority not shown | 0.585   |
| [CoP] Exeter V40 Elite Plus Ogee                              | 420            | 0.56                   | -0.27                     | [-0.99 , 0.45]  | Non-inferiority not shown | 0.467   |
| [CoP] Exeter V40 Exeter Contemporary Flanged                  | 919            | 0.88                   | 0.06                      | [-0.57 , 0.68]  | Non-inferiority not shown | 0.862   |
| [CoP] Exeter V40 Exeter X3 Rimfit                             | 649            | 1.27                   | 0.44                      | [-0.27 , 1.15]  | Non-inferiority not shown | 0.225   |
| [CoP] Exeter V40 Trilogy                                      | 599            | 1.36                   | 0.53                      | [-0.42 , 1.48]  | Non-inferiority not shown | 0.274   |
| [CoP] Furlong HAC Stem CSF                                    | 1,990          | 0.93                   | 0.11                      | [-0.43 , 0.64]  | Non-inferiority not shown | 0.699   |
| [CoP] Furlong HAC Stem Furlong HAC CSF Plus                   | 563            | 1.40                   | 0.58                      | [-0.29 , 1.44]  | Non-inferiority not shown | 0.193   |
| [CoP] MS-30 Original ME Muller Low Profile Cup                | 375            | 0.21                   | -0.62                     | [-1.16 , -0.07] | Non-inferior              | 0.026   |
| [CoP] SL-Plus Cementless Stem EP-Fit Plus                     | 268            | 1.45                   | 0.62                      | [-0.83 , 2.07]  | Non-inferiority not shown | 0.404   |
| [CoP] Taperloc Cementless Stem Exceed ABT                     | 601            | 1.04                   | 0.21                      | [-0.48 , 0.89]  | Non-inferiority not shown | 0.552   |
| [MoP] Accolade Trident                                        | 2,467          | 2.30                   | 1.47                      | [ 0.83 , 2.12]  | Inferior by $\geq 100\%$  | <0.001  |
| [MoP] Anthology R3 Cementless                                 | 292            | 2.08                   | 1.25                      | [ 0.01 , 2.49]  | Non-inferiority not shown | 0.048   |
| [MoP] C-Stem AMT Cemented Stem Charnley and Elite Plus LPW    | 419            | 1.68                   | 0.85                      | [-0.36 , 2.06]  | Non-inferiority not shown | 0.167   |
| [MoP] C-Stem AMT Cemented Stem Marathon                       | 256            | 1.18                   | 0.35                      | [-0.62 , 1.32]  | Non-inferiority not shown | 0.475   |
| [MoP] C-Stem AMT Cemented Stem Pinnacle                       | 322            | 1.15                   | 0.32                      | [-0.55 , 1.19]  | Non-inferiority not shown | 0.474   |
| [MoP] C-Stem Cemented Stem Charnley and Elite Plus LPW        | 322            | 1.16                   | 0.34                      | [-0.85 , 1.52]  | Non-inferiority not shown | 0.579   |
| [MoP] C-Stem Cemented Stem Elite Plus Ogee                    | 830            | 1.26                   | 0.43                      | [-0.36 , 1.23]  | Non-inferiority not shown | 0.283   |



|                                                          |       |      |       |                |                           |        |
|----------------------------------------------------------|-------|------|-------|----------------|---------------------------|--------|
| [MoP] C-Stem Cemented Stem Marathon                      | 418   | 1.27 | 0.44  | [-0.53 , 1.41] | Non-inferiority not shown | 0.372  |
| [MoP] C-Stem Cemented Stem Opera                         | 391   | 1.47 | 0.64  | [-0.58 , 1.86] | Non-inferiority not shown | 0.301  |
| [MoP] CPT Elite Plus Ogee                                | 550   | 1.47 | 0.64  | [-0.37 , 1.65] | Non-inferiority not shown | 0.217  |
| [MoP] CPT Trilogy                                        | 1,745 | 1.63 | 0.80  | [ 0.18 , 1.42] | Inferior by $\geq 20\%$   | 0.012  |
| [MoP] CPT ZCA                                            | 1,031 | 1.26 | 0.43  | [-0.25 , 1.12] | Non-inferiority not shown | 0.213  |
| [MoP] Charnley Cemented Stem Charnley Cemented Cup       | 1,058 | 1.60 | 0.77  | [-0.04 , 1.58] | Non-inferiority not shown | 0.063  |
| [MoP] Charnley Cemented Stem Charnley Ogee               | 2,239 | 1.38 | 0.55  | [-0.03 , 1.13] | Non-inferiority not shown | 0.064  |
| [MoP] Charnley Cemented Stem Charnley and Elite Plus LPW | 1,040 | 0.88 | 0.05  | [-0.59 , 0.69] | Non-inferiority not shown | 0.886  |
| [MoP] Charnley Cemented Stem Opera                       | 280   | 1.36 | 0.53  | [-0.84 , 1.90] | Non-inferiority not shown | 0.446  |
| [MoP] Corail Duraloc Cementless Cup                      | 978   | 1.96 | 1.13  | [ 0.21 , 2.05] | Inferior by $\geq 20\%$   | 0.016  |
| [MoP] Corail Elite Plus Ogee                             | 308   | 1.86 | 1.03  | [-0.38 , 2.44] | Non-inferiority not shown | 0.153  |
| [MoP] Corail Marathon                                    | 645   | 1.37 | 0.54  | [-0.27 , 1.35] | Non-inferiority not shown | 0.188  |
| [MoP] Corail Pinnacle                                    | 7,845 | 1.52 | 0.69  | [ 0.28 , 1.11] | Inferior by $\geq 20\%$   | 0.001  |
| [MoP] Corail Trilogy                                     | 517   | 1.76 | 0.93  | [-0.20 , 2.07] | Non-inferiority not shown | 0.108  |
| [MoP] Exeter V40 Cenator Cemented Cup                    | 395   | 1.46 | 0.63  | [-0.58 , 1.84] | Non-inferiority not shown | 0.307  |
| [MoP] Exeter V40 Charnley and Elite Plus LPW             | 397   | 1.70 | 0.87  | [-0.35 , 2.09] | Non-inferiority not shown | 0.164  |
| [MoP] Exeter V40 Duraloc Cementless Cup                  | 265   | 2.54 | 1.71  | [-0.18 , 3.60] | Non-inferiority not shown | 0.076  |
| [MoP] Exeter V40 Elite Plus Cemented Cup                 | 749   | 0.95 | 0.12  | [-0.62 , 0.86] | Non-inferiority not shown | 0.748  |
| [MoP] Exeter V40 Elite Plus Ogee                         | 3,262 | 1.05 | 0.22  | [-0.26 , 0.69] | Non-inferiority not shown | 0.369  |
| [MoP] Exeter V40 Exeter Contemporary Flanged             | 8,180 | 1.18 | 0.35  | [-0.05 , 0.75] | Non-inferiority not shown | 0.090  |
| [MoP] Exeter V40 Exeter Contemporary Hooded              | 2,960 | 1.74 | 0.91  | [ 0.36 , 1.45] | Inferior by $\geq 20\%$   | 0.001  |
| [MoP] Exeter V40 Exeter Duration                         | 2,482 | 1.53 | 0.70  | [ 0.13 , 1.27] | Non-inferiority not shown | 0.016  |
| [MoP] Exeter V40 Exeter X3 Rimfit                        | 1,213 | 1.48 | 0.65  | [ 0.03 , 1.28] | Non-inferiority not shown | 0.039  |
| [MoP] Exeter V40 Marathon                                | 261   | 0.86 | 0.03  | [-0.80 , 0.85] | Non-inferiority not shown | 0.946  |
| [MoP] Exeter V40 Opera                                   | 414   | 0.71 | -0.12 | [-0.99 , 0.75] | Non-inferiority not shown | 0.785  |
| [MoP] Exeter V40 Pinnacle                                | 462   | 1.75 | 0.92  | [-0.12 , 1.97] | Non-inferiority not shown | 0.084  |
| [MoP] Exeter V40 Reflection Cementless                   | 467   | 1.44 | 0.61  | [-0.50 , 1.72] | Non-inferiority not shown | 0.284  |
| [MoP] Exeter V40 Trident                                 | 4,119 | 1.23 | 0.40  | [-0.04 , 0.85] | Non-inferiority not shown | 0.074  |
| [MoP] Exeter V40 Trilogy                                 | 2,325 | 1.03 | 0.20  | [-0.32 , 0.71] | Non-inferiority not shown | 0.455  |
| [MoP] Furlong Cemented Stem JRI Cemented Cup             | 250   | 1.52 | 0.69  | [-0.83 , 2.21] | Non-inferiority not shown | 0.371  |
| [MoP] Furlong HAC Stem CSF                               | 1,718 | 1.67 | 0.84  | [ 0.17 , 1.51] | Inferior by $\geq 20\%$   | 0.014  |
| [MoP] Furlong HAC Stem Furlong HAC CSF Plus              | 689   | 2.04 | 1.21  | [ 0.27 , 2.14] | Inferior by $\geq 20\%$   | 0.011  |
| [MoP] M/L Taper Cementless Allofit                       | 280   | 1.41 | 0.58  | [-0.69 , 1.85] | Non-inferiority not shown | 0.373  |
| [MoP] Muller-Biomet Apollo                               | 460   | 1.24 | 0.41  | [-0.63 , 1.46] | Non-inferiority not shown | 0.438  |
| [MoP] Polarstem Cementless R3 Cementless                 | 330   | 1.22 | 0.39  | [-0.35 , 1.13] | Non-inferiority not shown | 0.302  |
| [MoP] SL-Plus Cementless Stem EP-Fit Plus                | 642   | 3.41 | 2.58  | [ 1.24 , 3.91] | Inferior by $\geq 100\%$  | <0.001 |
| [MoP] Stanmore Modular Stem Stanmore-Arcom Cup           | 546   | 0.90 | 0.07  | [-0.72 , 0.87] | Non-inferiority not shown | 0.856  |
| [MoP] Synergy Cementless Stem R3 Cementless              | 318   | 1.21 | 0.38  | [-0.54 , 1.29] | Non-inferiority not shown | 0.416  |
| [MoP] Synergy Cementless Stem Reflection Cementless      | 439   | 1.54 | 0.71  | [-0.47 , 1.89] | Non-inferiority not shown | 0.239  |
| [MoP] Taperloc Cementless Stem Exceed ABT                | 971   | 1.32 | 0.49  | [-0.18 , 1.17] | Non-inferiority not shown | 0.154  |
| [MoP] Versys Cementless Stem Trilogy                     | 282   | 3.38 | 2.55  | [ 0.46 , 4.64] | Inferior by $\geq 20\%$   | 0.017  |

**Supplemental table 8b: Difference in Kaplan-Meier failure estimate between a contemporary reference and implants with at least 250 at risk at 5 years since primary in males between 55 and 75 years**

| Stem/cup brand                                                | Number at risk | Cumulative failure (%) | Difference in failure (%) | 95% CI          | Equivalence status        | p-value |
|---------------------------------------------------------------|----------------|------------------------|---------------------------|-----------------|---------------------------|---------|
| [CoP] Furlong HAC Stem CSF                                    | 1,759          | 1.09                   | [REFERENCE]               |                 |                           |         |
| [CoC] ABG II Monolithic Cementless Stem ABG II Cementless Cup | 392            | 2.82                   | 1.73                      | [ 0.09 , 3.37]  | Non-inferiority not shown | 0.038   |
| [CoC] ABG II Monolithic Cementless Stem Trident               | 306            | 3.89                   | 2.80                      | [ 0.74 , 4.85]  | Inferior by $\geq 20\%$   | 0.008   |
| [CoC] Accolade Trident                                        | 1,624          | 2.87                   | 1.77                      | [ 0.94 , 2.60]  | Inferior by $\geq 20\%$   | <0.001  |
| [CoC] Corail Duraloc Option                                   | 303            | 2.50                   | 1.41                      | [-0.36 , 3.18]  | Non-inferiority not shown | 0.119   |
| [CoC] Corail Pinnacle                                         | 5,229          | 2.37                   | 1.28                      | [ 0.74 , 1.82]  | Inferior by $\geq 20\%$   | <0.001  |
| [CoC] Exeter V40 ABG II Cementless Cup                        | 269            | 1.15                   | 0.06                      | [-1.16 , 1.28]  | Non-inferiority not shown | 0.924   |
| [CoC] Exeter V40 Trident                                      | 2,279          | 1.74                   | 0.65                      | [ 0.00 , 1.29]  | Non-inferiority not shown | 0.049   |
| [CoC] Furlong HAC Stem CSF                                    | 438            | 3.80                   | 2.70                      | [ 0.93 , 4.48]  | Inferior by $\geq 20\%$   | 0.003   |
| [CoC] Furlong HAC Stem Furlong HAC CSF Plus                   | 1,705          | 1.86                   | 0.76                      | [ 0.13 , 1.40]  | Non-inferiority not shown | 0.018   |
| [CoC] SL-Plus Cementless Stem EP-Fit Plus                     | 367            | 5.89                   | 4.79                      | [ 2.51 , 7.08]  | Inferior by $\geq 100\%$  | <0.001  |
| [CoC] Taperloc Cementless Stem Exceed ABT                     | 1,161          | 1.61                   | 0.52                      | [-0.15 , 1.18]  | Non-inferiority not shown | 0.127   |
| [CoP] Accolade Trident                                        | 422            | 1.94                   | 0.85                      | [-0.03 , 1.72]  | Non-inferiority not shown | 0.057   |
| [CoP] Corail Pinnacle                                         | 1,340          | 1.58                   | 0.48                      | [-0.14 , 1.11]  | Non-inferiority not shown | 0.131   |
| [CoP] Exeter V40 Elite Plus Ogee                              | 294            | 0.88                   | -0.21                     | [-1.21 , 0.79]  | Non-inferiority not shown | 0.680   |
| [CoP] Exeter V40 Exeter Contemporary Flanged                  | 635            | 0.88                   | -0.21                     | [-0.90 , 0.48]  | Non-inferiority not shown | 0.548   |
| [CoP] Exeter V40 Trident                                      | 670            | 0.97                   | -0.12                     | [-0.75 , 0.51]  | Non-inferiority not shown | 0.701   |
| [CoP] Exeter V40 Trilogy                                      | 492            | 1.71                   | 0.62                      | [-0.48 , 1.72]  | Non-inferiority not shown | 0.272   |
| [CoP] Furlong HAC Stem Furlong HAC CSF Plus                   | 327            | 1.60                   | 0.51                      | [-0.48 , 1.50]  | Non-inferiority not shown | 0.313   |
| [CoP] MS-30 Original ME Muller Low Profile Cup                | 267            | 0.21                   | -0.88                     | [-1.49 , -0.27] | Non-inferior              | 0.005   |
| [MoP] Accolade Trident                                        | 1,703          | 3.33                   | 2.24                      | [ 1.42 , 3.05]  | Inferior by $\geq 100\%$  | <0.001  |
| [MoP] C-Stem AMT Cemented Stem Charnley and Elite Plus LPW    | 283            | 1.68                   | 0.58                      | [-0.65 , 1.82]  | Non-inferiority not shown | 0.355   |
| [MoP] C-Stem Cemented Stem Charnley and Elite Plus LPW        | 296            | 1.16                   | 0.07                      | [-1.15 , 1.29]  | Non-inferiority not shown | 0.911   |
| [MoP] C-Stem Cemented Stem Elite Plus Ogee                    | 639            | 1.26                   | 0.17                      | [-0.67 , 1.01]  | Non-inferiority not shown | 0.696   |
| [MoP] C-Stem Cemented Stem Opera                              | 288            | 2.29                   | 1.20                      | [-0.35 , 2.75]  | Non-inferiority not shown | 0.129   |
| [MoP] CPT Elite Plus Ogee                                     | 426            | 2.12                   | 1.02                      | [-0.25 , 2.30]  | Non-inferiority not shown | 0.116   |
| [MoP] CPT Trilogy                                             | 1,247          | 2.23                   | 1.14                      | [ 0.35 , 1.92]  | Inferior by $\geq 20\%$   | 0.005   |
| [MoP] CPT ZCA                                                 | 825            | 1.91                   | 0.81                      | [-0.09 , 1.71]  | Non-inferiority not shown | 0.076   |
| [MoP] Charnley Cemented Stem Charnley Cemented Cup            | 942            | 2.86                   | 1.76                      | [ 0.67 , 2.85]  | Inferior by $\geq 20\%$   | 0.002   |
| [MoP] Charnley Cemented Stem Charnley Ogee                    | 1,978          | 2.45                   | 1.35                      | [ 0.58 , 2.13]  | Inferior by $\geq 20\%$   | 0.001   |
| [MoP] Charnley Cemented Stem Charnley and Elite Plus LPW      | 929            | 1.28                   | 0.19                      | [-0.62 , 0.99]  | Non-inferiority not shown | 0.650   |
| [MoP] Corail Duraloc Cementless Cup                           | 923            | 2.79                   | 1.69                      | [ 0.58 , 2.80]  | Inferior by $\geq 20\%$   | 0.003   |
| [MoP] Corail Marathon                                         | 326            | 1.77                   | 0.67                      | [-0.34 , 1.69]  | Non-inferiority not shown | 0.193   |
| [MoP] Corail Pinnacle                                         | 4,602          | 1.85                   | 0.76                      | [ 0.24 , 1.28]  | Inferior by $\geq 20\%$   | 0.004   |
| [MoP] Corail Trilogy                                          | 393            | 2.43                   | 1.34                      | [-0.05 , 2.72]  | Non-inferiority not shown | 0.059   |
| [MoP] Exeter V40 Cenator Cemented Cup                         | 337            | 1.97                   | 0.87                      | [-0.55 , 2.30]  | Non-inferiority not shown | 0.229   |
| [MoP] Exeter V40 Charnley and Elite Plus LPW                  | 317            | 1.70                   | 0.60                      | [-0.65 , 1.86]  | Non-inferiority not shown | 0.347   |
| [MoP] Exeter V40 Duraloc Cementless Cup                       | 252            | 2.92                   | 1.83                      | [-0.22 , 3.87]  | Non-inferiority not shown | 0.080   |
| [MoP] Exeter V40 Elite Plus Cemented Cup                      | 583            | 1.39                   | 0.30                      | [-0.64 , 1.23]  | Non-inferiority not shown | 0.533   |

|                                                     |       |      |      |                |                           |        |
|-----------------------------------------------------|-------|------|------|----------------|---------------------------|--------|
| [MoP] Exeter V40 Elite Plus Ogee                    | 2,569 | 1.35 | 0.26 | [-0.33 , 0.85] | Non-inferiority not shown | 0.390  |
| [MoP] Exeter V40 Exeter Contemporary Flanged        | 5,599 | 1.66 | 0.56 | [ 0.04 , 1.08] | Non-inferiority not shown | 0.033  |
| [MoP] Exeter V40 Exeter Contemporary Hooded         | 2,246 | 2.26 | 1.17 | [ 0.50 , 1.84] | Inferior by $\geq 20\%$   | 0.001  |
| [MoP] Exeter V40 Exeter Duration                    | 1,970 | 2.29 | 1.20 | [ 0.47 , 1.92] | Inferior by $\geq 20\%$   | 0.001  |
| [MoP] Exeter V40 Opera                              | 298   | 1.53 | 0.43 | [-0.86 , 1.73] | Non-inferiority not shown | 0.512  |
| [MoP] Exeter V40 Pinnacle                           | 305   | 2.50 | 1.40 | [ 0.04 , 2.77] | Non-inferiority not shown | 0.044  |
| [MoP] Exeter V40 Reflection Cementless              | 426   | 2.31 | 1.22 | [-0.21 , 2.64] | Non-inferiority not shown | 0.094  |
| [MoP] Exeter V40 Trident                            | 2,530 | 1.68 | 0.59 | [ 0.02 , 1.16] | Non-inferiority not shown | 0.044  |
| [MoP] Exeter V40 Trilogy                            | 1,851 | 1.21 | 0.12 | [-0.50 , 0.74] | Non-inferiority not shown | 0.703  |
| [MoP] Furlong HAC Stem CSF                          | 1,448 | 1.97 | 0.88 | [ 0.11 , 1.65] | Non-inferiority not shown | 0.026  |
| [MoP] Furlong HAC Stem Furlong HAC CSF Plus         | 430   | 3.06 | 1.97 | [ 0.70 , 3.23] | Inferior by $\geq 20\%$   | 0.002  |
| [MoP] Muller-Biomet Apollo                          | 375   | 1.47 | 0.37 | [-0.80 , 1.54] | Non-inferiority not shown | 0.531  |
| [MoP] SL-Plus Cementless Stem EP-Fit Plus           | 554   | 4.71 | 3.62 | [ 2.00 , 5.24] | Inferior by $\geq 100\%$  | <0.001 |
| [MoP] Stanmore Modular Stem Stanmore-Arcom Cup      | 434   | 1.51 | 0.41 | [-0.67 , 1.50] | Non-inferiority not shown | 0.455  |
| [MoP] Synergy Cementless Stem Reflection Cementless | 407   | 2.46 | 1.37 | [-0.14 , 2.87] | Non-inferiority not shown | 0.075  |
| [MoP] Taperloc Cementless Stem Exceed ABT           | 448   | 1.64 | 0.55 | [-0.32 , 1.41] | Non-inferiority not shown | 0.214  |
| [MoP] Versys Cementless Stem Trilogy                | 261   | 3.73 | 2.64 | [ 0.43 , 4.85] | Inferior by $\geq 20\%$   | 0.019  |

**Supplemental table 8c: Difference in Kaplan-Meier failure estimate between a contemporary reference and implants with at least 250 at risk at 7 years since primary in males between 55 and 75 years**

| Stem/cup brand                                                | Number at risk | Cumulative failure (%) | Difference in failure (%) | 95% CI         | Equivalence status        | p-value |
|---------------------------------------------------------------|----------------|------------------------|---------------------------|----------------|---------------------------|---------|
| [CoP] Furlong HAC Stem CSF                                    | 1,463          | 1.34                   | [REFERENCE]               |                |                           |         |
| [CoC] ABG II Monolithic Cementless Stem ABG II Cementless Cup | 345            | 3.88                   | 2.53                      | [ 0.60 , 4.47] | Inferior by $\geq 20\%$   | 0.010   |
| [CoC] Accolade Trident                                        | 907            | 3.15                   | 1.81                      | [ 0.90 , 2.71] | Inferior by $\geq 20\%$   | <0.001  |
| [CoC] Corail Pinnacle                                         | 2,130          | 2.66                   | 1.32                      | [ 0.70 , 1.94] | Inferior by $\geq 20\%$   | <0.001  |
| [CoC] Exeter V40 Trident                                      | 1,626          | 2.00                   | 0.66                      | [-0.06 , 1.38] | Non-inferiority not shown | 0.074   |
| [CoC] Furlong HAC Stem CSF                                    | 415            | 4.02                   | 2.68                      | [ 0.84 , 4.53] | Inferior by $\geq 20\%$   | 0.004   |
| [CoC] Furlong HAC Stem Furlong HAC CSF Plus                   | 674            | 2.13                   | 0.79                      | [ 0.06 , 1.51] | Non-inferiority not shown | 0.034   |
| [CoC] SL-Plus Cementless Stem EP-Fit Plus                     | 322            | 6.44                   | 5.09                      | [ 2.69 , 7.50] | Inferior by $\geq 100\%$  | <0.001  |
| [CoC] Taperloc Cementless Stem Exceed ABT                     | 469            | 1.99                   | 0.65                      | [-0.20 , 1.49] | Non-inferiority not shown | 0.132   |
| [CoP] Corail Pinnacle                                         | 480            | 2.24                   | 0.90                      | [-0.00 , 1.80] | Non-inferiority not shown | 0.051   |
| [CoP] Exeter V40 Exeter Contemporary Flanged                  | 335            | 0.88                   | -0.46                     | [-1.19 , 0.27] | Non-inferiority not shown | 0.218   |
| [CoP] Exeter V40 Trident                                      | 362            | 1.17                   | -0.17                     | [-0.95 , 0.61] | Non-inferiority not shown | 0.668   |
| [CoP] Exeter V40 Trilogy                                      | 350            | 1.92                   | 0.57                      | [-0.62 , 1.77] | Non-inferiority not shown | 0.347   |
| [MoP] Accolade Trident                                        | 787            | 3.94                   | 2.60                      | [ 1.64 , 3.55] | Inferior by $\geq 100\%$  | <0.001  |
| [MoP] C-Stem Cemented Stem Charnley and Elite Plus LPW        | 272            | 1.16                   | -0.18                     | [-1.42 , 1.07] | Non-inferiority not shown | 0.779   |
| [MoP] C-Stem Cemented Stem Elite Plus Ogee                    | 494            | 1.45                   | 0.11                      | [-0.84 , 1.06] | Non-inferiority not shown | 0.818   |
| [MoP] CPT Elite Plus Ogee                                     | 325            | 2.35                   | 1.01                      | [-0.37 , 2.38] | Non-inferiority not shown | 0.151   |
| [MoP] CPT Trilogy                                             | 815            | 2.41                   | 1.06                      | [ 0.21 , 1.92] | Non-inferiority not shown | 0.015   |
| [MoP] CPT ZCA                                                 | 599            | 2.69                   | 1.35                      | [ 0.23 , 2.46] | Non-inferiority not shown | 0.018   |
| [MoP] Charnley Cemented Stem Charnley Cemented Cup            | 813            | 3.75                   | 2.41                      | [ 1.14 , 3.68] | Inferior by $\geq 20\%$   | <0.001  |
| [MoP] Charnley Cemented Stem Charnley Ogee                    | 1,632          | 3.68                   | 2.34                      | [ 1.39 , 3.29] | Inferior by $\geq 100\%$  | <0.001  |
| [MoP] Charnley Cemented Stem Charnley and Elite Plus LPW      | 776            | 1.98                   | 0.64                      | [-0.37 , 1.64] | Non-inferiority not shown | 0.212   |
| [MoP] Corail Duraloc Cementless Cup                           | 750            | 3.84                   | 2.50                      | [ 1.18 , 3.82] | Inferior by $\geq 20\%$   | <0.001  |
| [MoP] Corail Pinnacle                                         | 2,172          | 2.41                   | 1.07                      | [ 0.44 , 1.70] | Inferior by $\geq 20\%$   | 0.001   |
| [MoP] Corail Trilogy                                          | 254            | 3.58                   | 2.24                      | [ 0.45 , 4.03] | Inferior by $\geq 20\%$   | 0.014   |
| [MoP] Exeter V40 Cenator Cemented Cup                         | 263            | 2.66                   | 1.32                      | [-0.40 , 3.04] | Non-inferiority not shown | 0.134   |
| [MoP] Exeter V40 Elite Plus Cemented Cup                      | 400            | 1.39                   | 0.05                      | [-0.92 , 1.02] | Non-inferiority not shown | 0.920   |
| [MoP] Exeter V40 Elite Plus Ogee                              | 1,861          | 1.79                   | 0.45                      | [-0.24 , 1.14] | Non-inferiority not shown | 0.203   |
| [MoP] Exeter V40 Exeter Contemporary Flanged                  | 3,658          | 2.15                   | 0.81                      | [ 0.21 , 1.42] | Non-inferiority not shown | 0.008   |
| [MoP] Exeter V40 Exeter Contemporary Hooded                   | 1,560          | 2.93                   | 1.58                      | [ 0.78 , 2.38] | Inferior by $\geq 20\%$   | <0.001  |
| [MoP] Exeter V40 Exeter Duration                              | 1,396          | 3.26                   | 1.92                      | [ 1.02 , 2.82] | Inferior by $\geq 20\%$   | <0.001  |
| [MoP] Exeter V40 Reflection Cementless                        | 339            | 2.55                   | 1.21                      | [-0.31 , 2.73] | Non-inferiority not shown | 0.117   |
| [MoP] Exeter V40 Trident                                      | 1,455          | 1.83                   | 0.48                      | [-0.16 , 1.12] | Non-inferiority not shown | 0.140   |
| [MoP] Exeter V40 Trilogy                                      | 1,299          | 1.71                   | 0.37                      | [-0.38 , 1.12] | Non-inferiority not shown | 0.332   |
| [MoP] Furlong HAC Stem CSF                                    | 1,139          | 2.72                   | 1.37                      | [ 0.45 , 2.30] | Inferior by $\geq 20\%$   | 0.004   |
| [MoP] Muller-Biomet Apollo                                    | 277            | 1.47                   | 0.13                      | [-1.07 , 1.32] | Non-inferiority not shown | 0.835   |
| [MoP] SL-Plus Cementless Stem EP-Fit Plus                     | 411            | 6.01                   | 4.67                      | [ 2.79 , 6.55] | Inferior by $\geq 100\%$  | <0.001  |
| [MoP] Stanmore Modular Stem Stanmore-Arcum Cup                | 312            | 2.00                   | 0.66                      | [-0.64 , 1.96] | Non-inferiority not shown | 0.320   |
| [MoP] Synergy Cementless Stem Reflection Cementless           | 298            | 2.71                   | 1.37                      | [-0.23 , 2.96] | Non-inferiority not shown | 0.093   |



**Supplemental table 8d: Difference in Kaplan-Meier failure estimate between a contemporary reference and implants with at least 250 at risk at 10 years since primary in males between 55 and 75 years**

| Stem/cup brand                                                | Number at risk | Cumulative failure (%) | Difference in failure (%) | 95% CI          | Equivalence status        | p-value |
|---------------------------------------------------------------|----------------|------------------------|---------------------------|-----------------|---------------------------|---------|
| [MoP] Exeter V40 Exeter Contemporary Flanged                  | 1,182          | 3.08                   | [REFERENCE]               |                 |                           |         |
| [CoC] ABG II Monolithic Cementless Stem ABG II Cementless Cup | 257            | 5.45                   | 2.38                      | [ 0.02 , 4.73]  | Non-inferiority not shown | 0.048   |
| [CoC] Exeter V40 Trident                                      | 545            | 2.49                   | -0.59                     | [-1.46 , 0.27]  | Non-inferior              | 0.179   |
| [CoP] Furlong HAC Stem CSF                                    | 855            | 1.75                   | -1.32                     | [-2.14 , -0.51] | Non-inferior              | 0.001   |
| [MoP] C-Stem Cemented Stem Elite Plus Ogee                    | 254            | 2.48                   | -0.60                     | [-2.00 , 0.80]  | Non-inferiority not shown | 0.400   |
| [MoP] CPT Trilogy                                             | 302            | 3.83                   | 0.75                      | [-0.59 , 2.10]  | Non-inferiority not shown | 0.272   |
| [MoP] Charnley Cemented Stem Charnley Cemented Cup            | 486            | 5.76                   | 2.68                      | [ 1.04 , 4.31]  | Inferior by $\geq 20\%$   | 0.001   |
| [MoP] Charnley Cemented Stem Charnley Ogee                    | 910            | 5.47                   | 2.39                      | [ 1.21 , 3.58]  | Inferior by $\geq 20\%$   | <0.001  |
| [MoP] Charnley Cemented Stem Charnley and Elite Plus LPW      | 500            | 3.21                   | 0.13                      | [-1.19 , 1.45]  | Non-inferiority not shown | 0.846   |
| [MoP] Corail Duraloc Cementless Cup                           | 336            | 7.31                   | 4.23                      | [ 2.19 , 6.27]  | Inferior by $\geq 20\%$   | <0.001  |
| [MoP] Corail Pinnacle                                         | 545            | 3.39                   | 0.31                      | [-0.53 , 1.15]  | Non-inferiority not shown | 0.468   |
| [MoP] Exeter V40 Elite Plus Ogee                              | 805            | 2.81                   | -0.27                     | [-1.18 , 0.65]  | Non-inferiority not shown | 0.568   |
| [MoP] Exeter V40 Exeter Contemporary Hooded                   | 600            | 4.02                   | 0.94                      | [-0.09 , 1.98]  | Non-inferiority not shown | 0.074   |
| [MoP] Exeter V40 Exeter Duration                              | 642            | 5.21                   | 2.14                      | [ 0.92 , 3.35]  | Inferior by $\geq 20\%$   | 0.001   |
| [MoP] Exeter V40 Trident                                      | 335            | 2.78                   | -0.30                     | [-1.32 , 0.72]  | Non-inferiority not shown | 0.566   |
| [MoP] Exeter V40 Trilogy                                      | 482            | 3.05                   | -0.03                     | [-1.09 , 1.03]  | Non-inferiority not shown | 0.956   |
| [MoP] Furlong HAC Stem CSF                                    | 483            | 4.63                   | 1.55                      | [ 0.22 , 2.89]  | Non-inferiority not shown | 0.023   |

**Supplemental table 9a: Difference in Kaplan-Meier failure estimate between a contemporary reference and implants with at least 250 at risk at 3 years since primary in males >75 years**

| Stem/cup brand                                             | Number at risk | Cumulative failure (%) | Difference in failure (%) | 95% CI         | Equivalence status        | p-value |
|------------------------------------------------------------|----------------|------------------------|---------------------------|----------------|---------------------------|---------|
| [MoP] Exeter V40 Elite Plus Ogee                           | 2,199          | 0.78                   | [REFERENCE]               |                |                           |         |
| [CoC] Corail Pinnacle                                      | 540            | 2.35                   | 1.57                      | [ 0.38 , 2.76] | Inferior by $\geq 20\%$   | 0.010   |
| [CoC] Furlong HAC Stem Furlong HAC CSF Plus                | 350            | 2.46                   | 1.68                      | [ 0.26 , 3.10] | Inferior by $\geq 20\%$   | 0.020   |
| [CoP] Corail Pinnacle                                      | 306            | 1.43                   | 0.65                      | [-0.25 , 1.56] | Non-inferiority not shown | 0.159   |
| [CoP] Furlong HAC Stem CSF                                 | 326            | 1.19                   | 0.41                      | [-0.68 , 1.51] | Non-inferiority not shown | 0.456   |
| [MoP] Accolade Trident                                     | 911            | 2.78                   | 2.00                      | [ 1.01 , 3.00] | Inferior by $\geq 100\%$  | <0.001  |
| [MoP] C-Stem AMT Cemented Stem Charnley and Elite Plus LPW | 293            | 1.38                   | 0.60                      | [-0.65 , 1.85] | Non-inferiority not shown | 0.347   |
| [MoP] C-Stem AMT Cemented Stem Elite Plus Ogee             | 265            | 0.56                   | -0.22                     | [-1.07 , 0.63] | Non-inferiority not shown | 0.618   |
| [MoP] C-Stem Cemented Stem Elite Plus Ogee                 | 365            | 1.07                   | 0.29                      | [-0.70 , 1.28] | Non-inferiority not shown | 0.563   |
| [MoP] CPT Elite Plus Ogee                                  | 287            | 2.08                   | 1.30                      | [-0.26 , 2.87] | Non-inferiority not shown | 0.103   |
| [MoP] CPT Trilogy                                          | 894            | 1.93                   | 1.15                      | [ 0.34 , 1.97] | Inferior by $\geq 20\%$   | 0.005   |
| [MoP] CPT ZCA                                              | 1,080          | 1.70                   | 0.93                      | [ 0.22 , 1.63] | Inferior by $\geq 20\%$   | 0.010   |
| [MoP] Charnley Cemented Stem Charnley Cemented Cup         | 398            | 0.92                   | 0.14                      | [-0.82 , 1.10] | Non-inferiority not shown | 0.771   |
| [MoP] Charnley Cemented Stem Charnley Ogee                 | 959            | 1.32                   | 0.54                      | [-0.20 , 1.28] | Non-inferiority not shown | 0.154   |
| [MoP] Charnley Cemented Stem Charnley and Elite Plus LPW   | 559            | 1.07                   | 0.29                      | [-0.56 , 1.14] | Non-inferiority not shown | 0.507   |
| [MoP] Corail Duraloc Cementless Cup                        | 280            | 0.64                   | -0.14                     | [-1.08 , 0.81] | Non-inferiority not shown | 0.780   |
| [MoP] Corail Marathon                                      | 317            | 1.78                   | 1.00                      | [-0.14 , 2.14] | Non-inferiority not shown | 0.084   |
| [MoP] Corail Pinnacle                                      | 2,860          | 1.59                   | 0.81                      | [ 0.33 , 1.30] | Inferior by $\geq 20\%$   | 0.001   |
| [MoP] Exeter V40 Cenator Cemented Cup                      | 301            | 1.13                   | 0.35                      | [-0.80 , 1.51] | Non-inferiority not shown | 0.547   |
| [MoP] Exeter V40 Charnley and Elite Plus LPW               | 263            | 0.27                   | -0.51                     | [-1.13 , 0.12] | Non-inferior              | 0.113   |
| [MoP] Exeter V40 Elite Plus Cemented Cup                   | 394            | 0.78                   | 0.00                      | [-0.83 , 0.84] | Non-inferiority not shown | 0.994   |
| [MoP] Exeter V40 Exeter Contemporary Flanged               | 5,295          | 1.03                   | 0.25                      | [-0.15 , 0.65] | Non-inferiority not shown | 0.221   |
| [MoP] Exeter V40 Exeter Contemporary Hooded                | 2,098          | 1.84                   | 1.06                      | [ 0.48 , 1.64] | Inferior by $\geq 20\%$   | <0.001  |
| [MoP] Exeter V40 Exeter Duration                           | 1,426          | 1.51                   | 0.73                      | [ 0.08 , 1.39] | Non-inferiority not shown | 0.028   |
| [MoP] Exeter V40 Exeter X3 Rimfit                          | 537            | 1.21                   | 0.43                      | [-0.28 , 1.13] | Non-inferiority not shown | 0.237   |
| [MoP] Exeter V40 Opera                                     | 290            | 1.47                   | 0.69                      | [-0.63 , 2.01] | Non-inferiority not shown | 0.306   |
| [MoP] Exeter V40 Pinnacle                                  | 288            | 1.15                   | 0.37                      | [-0.62 , 1.36] | Non-inferiority not shown | 0.460   |
| [MoP] Exeter V40 Reflection Cementless                     | 256            | 2.46                   | 1.68                      | [-0.15 , 3.51] | Non-inferiority not shown | 0.072   |
| [MoP] Exeter V40 Trident                                   | 2,148          | 1.41                   | 0.63                      | [ 0.11 , 1.15] | Non-inferiority not shown | 0.018   |
| [MoP] Exeter V40 Trilogy                                   | 867            | 1.15                   | 0.37                      | [-0.36 , 1.10] | Non-inferiority not shown | 0.319   |
| [MoP] Furlong HAC Stem CSF                                 | 770            | 1.99                   | 1.21                      | [ 0.27 , 2.16] | Inferior by $\geq 20\%$   | 0.012   |
| [MoP] Furlong HAC Stem Furlong HAC CSF Plus                | 449            | 3.06                   | 2.28                      | [ 1.00 , 3.56] | Inferior by $\geq 100\%$  | <0.001  |
| [MoP] Muller-Biomet Apollo                                 | 276            | 0.96                   | 0.18                      | [-0.95 , 1.31] | Non-inferiority not shown | 0.755   |
| [MoP] Stanmore Modular Stem Stanmore-Arcom Cup             | 510            | 1.01                   | 0.23                      | [-0.64 , 1.09] | Non-inferiority not shown | 0.610   |
| [MoP] Taperloc Cementless Stem Exceed ABT                  | 421            | 1.75                   | 0.97                      | [ 0.01 , 1.94] | Non-inferiority not shown | 0.049   |

**Supplemental table 9b: Difference in Kaplan-Meier failure estimate between a contemporary reference and implants with at least 250 at risk at 5 years since primary in males >75 years**

| Stem/cup brand                                           | Number at risk | Cumulative failure (%) | Difference in failure (%) | 95% CI         | Equivalence status        | p-value |
|----------------------------------------------------------|----------------|------------------------|---------------------------|----------------|---------------------------|---------|
| [MoP] Exeter V40 Elite Plus Ogee                         | 1,490          | 1.10                   | [REFERENCE]               |                |                           |         |
| [CoC] Corail Pinnacle                                    | 321            | 2.82                   | 1.73                      | [ 0.35 , 3.11] | Inferior by $\geq 20\%$   | 0.014   |
| [MoP] Accolade Trident                                   | 540            | 3.41                   | 2.32                      | [ 1.12 , 3.51] | Inferior by $\geq 100\%$  | <0.001  |
| [MoP] C-Stem Cemented Stem Elite Plus Ogee               | 253            | 1.45                   | 0.36                      | [-0.91 , 1.62] | Non-inferiority not shown | 0.579   |
| [MoP] CPT Trilogy                                        | 535            | 2.58                   | 1.48                      | [ 0.46 , 2.50] | Inferior by $\geq 20\%$   | 0.004   |
| [MoP] CPT ZCA                                            | 693            | 2.90                   | 1.80                      | [ 0.78 , 2.83] | Inferior by $\geq 20\%$   | 0.001   |
| [MoP] Charnley Cemented Stem Charnley Cemented Cup       | 325            | 0.92                   | -0.17                     | [-1.16 , 0.82] | Non-inferiority not shown | 0.731   |
| [MoP] Charnley Cemented Stem Charnley Ogee               | 760            | 1.91                   | 0.81                      | [-0.12 , 1.75] | Non-inferiority not shown | 0.088   |
| [MoP] Charnley Cemented Stem Charnley and Elite Plus LPW | 446            | 1.43                   | 0.33                      | [-0.68 , 1.35] | Non-inferiority not shown | 0.521   |
| [MoP] Corail Pinnacle                                    | 1,479          | 1.98                   | 0.88                      | [ 0.27 , 1.49] | Inferior by $\geq 20\%$   | 0.005   |
| [MoP] Exeter V40 Elite Plus Cemented Cup                 | 271            | 1.04                   | -0.06                     | [-1.06 , 0.95] | Non-inferiority not shown | 0.910   |
| [MoP] Exeter V40 Exeter Contemporary Flanged             | 3,050          | 1.33                   | 0.24                      | [-0.26 , 0.74] | Non-inferiority not shown | 0.350   |
| [MoP] Exeter V40 Exeter Contemporary Hooded              | 1,283          | 2.09                   | 1.00                      | [ 0.32 , 1.68] | Inferior by $\geq 20\%$   | 0.004   |
| [MoP] Exeter V40 Exeter Duration                         | 1,041          | 2.08                   | 0.98                      | [ 0.17 , 1.80] | Non-inferiority not shown | 0.018   |
| [MoP] Exeter V40 Trident                                 | 1,100          | 1.57                   | 0.48                      | [-0.13 , 1.09] | Non-inferiority not shown | 0.125   |
| [MoP] Exeter V40 Trilogy                                 | 592            | 2.07                   | 0.97                      | [-0.05 , 1.99] | Non-inferiority not shown | 0.063   |
| [MoP] Furlong HAC Stem CSF                               | 561            | 2.27                   | 1.17                      | [ 0.12 , 2.22] | Non-inferiority not shown | 0.029   |
| [MoP] Stanmore Modular Stem Stanmore-Arcom Cup           | 358            | 1.20                   | 0.11                      | [-0.88 , 1.09] | Non-inferiority not shown | 0.834   |



**Supplemental table 9c: Difference in Kaplan-Meier failure estimate between a contemporary reference and implants with at least 250 at risk at 7 years since primary in males >75 years**

| <b>Stem/cup brand</b>                                    | <b>Number at risk</b> | <b>Cumulative failure (%)</b> | <b>Difference in failure (%)</b> | <b>95% CI</b>  | <b>Equivalence status</b> | <b>p-value</b> |
|----------------------------------------------------------|-----------------------|-------------------------------|----------------------------------|----------------|---------------------------|----------------|
| [MoP] Exeter V40 Exeter Contemporary Flanged             | 1,540                 | 1.76                          | [REFERENCE]                      |                |                           |                |
| [MoP] CPT Trilogy                                        | 264                   | 3.16                          | 1.40                             | [ 0.20 , 2.60] | Non-inferiority not shown | 0.022          |
| [MoP] CPT ZCA                                            | 390                   | 3.94                          | 2.18                             | [ 0.82 , 3.55] | Inferior by $\geq 20\%$   | 0.002          |
| [MoP] Charnley Cemented Stem Charnley Cemented Cup       | 252                   | 1.25                          | -0.51                            | [-1.68 , 0.66] | Non-inferiority not shown | 0.393          |
| [MoP] Charnley Cemented Stem Charnley Ogee               | 502                   | 2.56                          | 0.80                             | [-0.32 , 1.92] | Non-inferiority not shown | 0.162          |
| [MoP] Charnley Cemented Stem Charnley and Elite Plus LPW | 308                   | 1.43                          | -0.33                            | [-1.34 , 0.68] | Non-inferiority not shown | 0.520          |
| [MoP] Corail Pinnacle                                    | 542                   | 2.34                          | 0.58                             | [-0.14 , 1.30] | Non-inferiority not shown | 0.116          |
| [MoP] Exeter V40 Elite Plus Ogee                         | 868                   | 1.43                          | -0.33                            | [-0.99 , 0.32] | Non-inferior              | 0.315          |
| [MoP] Exeter V40 Exeter Contemporary Hooded              | 670                   | 2.53                          | 0.77                             | [-0.02 , 1.57] | Non-inferiority not shown | 0.056          |
| [MoP] Exeter V40 Exeter Duration                         | 643                   | 3.08                          | 1.32                             | [ 0.29 , 2.36] | Non-inferiority not shown | 0.012          |
| [MoP] Exeter V40 Trident                                 | 538                   | 2.35                          | 0.59                             | [-0.28 , 1.46] | Non-inferiority not shown | 0.185          |
| [MoP] Exeter V40 Trilogy                                 | 321                   | 2.07                          | 0.31                             | [-0.71 , 1.32] | Non-inferiority not shown | 0.553          |
| [MoP] Furlong HAC Stem CSF                               | 358                   | 3.06                          | 1.30                             | [ 0.01 , 2.60] | Non-inferiority not shown | 0.049          |

**Supplemental table 10a: Total number of implants at risk at each time-point by age-group and gender in implants with at least 500**

|               | Time since primary procedure |         |         |          |
|---------------|------------------------------|---------|---------|----------|
|               | 3 years                      | 5 years | 7 years | 10 years |
| Male, <55     | 7,977                        | 3,749   | No data | No data  |
| Male, 55-75   | 79,299                       | 49,540  | 27,512  | 6,584    |
| Male, 75+     | 23,653                       | 13,124  | 5,303   | No data  |
| Total Male    | 132,073                      | 82,003  | 42,294  | 10,348   |
| Female, <55   | 10,007                       | 6,016   | 2,303   | No data  |
| Female, 55-75 | 136,561                      | 91,874  | 52,940  | 15,848   |
| Female, 75+   | 64,959                       | 37,694  | 19,779  | No data  |
| Total Female  | 244,285                      | 156,505 | 91,701  | 24,408   |
| Total         | 415,608                      | 268,809 | 156,138 | 41,908   |

**Supplemental table 10b: Total number of implant failures at each time-point by age-group and gender in implants with at least 500 at risk**

|               | Time since primary procedure |         |         |          |
|---------------|------------------------------|---------|---------|----------|
|               | 3 years                      | 5 years | 7 years | 10 years |
| Male, <55     | 260                          | 132     | 68      | 53       |
| Male, 55-75   | 1,039                        | 533     | 364     | 442      |
| Male, 75+     | 293                          | 133     | 86      | 57       |
| Total Male    | 1,618                        | 811     | 529     | 560      |
| Female, <55   | 268                          | 141     | 102     | 79       |
| Female, 55-75 | 1,344                        | 784     | 539     | 545      |
| Female, 75+   | 458                          | 255     | 161     | 120      |
| Total Female  | 2,091                        | 1,189   | 820     | 754      |
| Total         | 3,733                        | 2,009   | 1,359   | 1,325    |
